# Supplementary material for: An Efficient Design of Systematic Rateless Codes
Source: Hindawi journal article supplement (doi:10.1155/2020/8068414), 2020-05-19
Supplement: f1 [file 8068414.f1.zip]

Archive with 330 entries (313 files):
- supplementary files/
- supplementary files/Matlab_code_for_Figure1/
- supplementary files/Matlab_code_for_Figure1/BER_by_DDE/
- supplementary files/Matlab_code_for_Figure1/BER_by_DDE/BER_by_DDE_awgn_sigma2_1_dist0_Ns.txt
- supplementary files/Matlab_code_for_Figure1/BER_by_DDE/BER_by_DDE_awgn_sigma_n_977_dist2016977_s.txt
- supplementary files/Matlab_code_for_Figure1/BER_by_DDE/BER_by_DDE_awgn_sigma_n_977_dist2019298_s.txt
- supplementary files/Matlab_code_for_Figure1/BER_by_DDE/BER_by_DDE_rician_rate_1_3_098_dist9_s.txt
- supplementary files/Matlab_code_for_Figure1/BER_by_DDE/ChNode_R2_first_fun.m
- supplementary files/Matlab_code_for_Figure1/BER_by_DDE/Copy_of_Gen_initial_message_BFSK_combL1_3.m
- supplementary files/Matlab_code_for_Figure1/BER_by_DDE/Cost_fun.m
- supplementary files/Matlab_code_for_Figure1/BER_by_DDE/Critical_BER_by_DDE_rate_090_099_dv3_5.txt
- supplementary files/Matlab_code_for_Figure1/BER_by_DDE/DDE_algo_main.m
- supplementary files/Matlab_code_for_Figure1/BER_by_DDE/DDE_algo_main_comp_gaussian.m
- supplementary files/Matlab_code_for_Figure1/BER_by_DDE/DDE_algo_main_find_crit_BER_of_out_code.m
- supplementary files/Matlab_code_for_Figure1/BER_by_DDE/DDE_algo_main_fixed_EsN0.m
- supplementary files/Matlab_code_for_Figure1/BER_by_DDE/DDE_algo_main_fixed_OH.m
- supplementary files/Matlab_code_for_Figure1/BER_by_DDE/DDE_algo_main_threshold.m
- supplementary files/Matlab_code_for_Figure1/BER_by_DDE/DDE_BER_GA_algo_main.m
- supplementary files/Matlab_code_for_Figure1/BER_by_DDE/degree_edge_to_node.m
- supplementary files/Matlab_code_for_Figure1/BER_by_DDE/degree_node_to_edge.m
- supplementary files/Matlab_code_for_Figure1/BER_by_DDE/Diff_evol_main.asv
- supplementary files/Matlab_code_for_Figure1/BER_by_DDE/Gene_Lookup_Table_for_ChNode_update.m
- supplementary files/Matlab_code_for_Figure1/BER_by_DDE/Gene_Lookup_Table_v__10_005_30_Process
- supplementary files/Matlab_code_for_Figure1/BER_by_DDE/Gene_Lookup_Table_v__5_005_45_Process
- supplementary files/Matlab_code_for_Figure1/BER_by_DDE/gen_check_dist.m
- supplementary files/Matlab_code_for_Figure1/BER_by_DDE/Gen_initial_message_BPSK_BFSK.m
- supplementary files/Matlab_code_for_Figure1/BER_by_DDE/Get_Initial_BFSK_Message.m
- supplementary files/Matlab_code_for_Figure1/BER_by_DDE/lookup_table_v__10_005_30.mat
- supplementary files/Matlab_code_for_Figure1/BER_by_DDE/lookup_table_v__20_005_60.mat
- supplementary files/Matlab_code_for_Figure1/BER_by_DDE/lookup_table_v__5_005_45.mat
- supplementary files/Matlab_code_for_Figure1/BER_by_DDE/LT_threshold.txt
- supplementary files/Matlab_code_for_Figure1/BER_by_DDE/omiga_BEC_sigma1_BEC.fig
- supplementary files/Matlab_code_for_Figure1/BER_by_DDE/Quan_fun2.m
- supplementary files/Matlab_code_for_Figure1/BER_by_DDE/test.txt
- supplementary files/Matlab_code_for_Figure1/BER_by_DDE/VarNode_conv.m
- supplementary files/Matlab_code_for_Figure1/BER_by_DDE/var_nodes_index_gen.m
- supplementary files/Matlab_code_for_Figure1/BER_by_DDE/仿真结果/
- supplementary files/Matlab_code_for_Figure1/BER_by_DDE/仿真结果/AWGN.fig
- supplementary files/Matlab_code_for_Figure1/BER_by_DDE/仿真结果/BER_by_DDE_awgn_rate_1_2_dist0_Ns.fig
- supplementary files/Matlab_code_for_Figure1/BER_by_DDE/仿真结果/BER_by_DDE_awgn_rate_1_2_dist0_Ns.txt
- supplementary files/Matlab_code_for_Figure1/BER_by_DDE/仿真结果/BER_by_DDE_awgn_rate_1_2_dist0_s.fig
- supplementary files/Matlab_code_for_Figure1/BER_by_DDE/仿真结果/BER_by_DDE_awgn_rate_1_2_dist0_s.txt
- supplementary files/Matlab_code_for_Figure1/BER_by_DDE/仿真结果/BER_by_DDE_awgn_rate_1_2_dist1_Ns.fig
- supplementary files/Matlab_code_for_Figure1/BER_by_DDE/仿真结果/BER_by_DDE_awgn_rate_1_2_dist1_Ns.txt
- supplementary files/Matlab_code_for_Figure1/BER_by_DDE/仿真结果/BER_by_DDE_awgn_rate_1_2_dist1_s.fig
- supplementary files/Matlab_code_for_Figure1/BER_by_DDE/仿真结果/BER_by_DDE_awgn_rate_1_2_dist1_s.txt
- supplementary files/Matlab_code_for_Figure1/BER_by_DDE/仿真结果/BER_by_DDE_awgn_rate_1_2_dist2_Ns.fig
- supplementary files/Matlab_code_for_Figure1/BER_by_DDE/仿真结果/BER_by_DDE_awgn_rate_1_2_dist2_Ns.txt
- supplementary files/Matlab_code_for_Figure1/BER_by_DDE/仿真结果/BER_by_DDE_awgn_rate_1_2_dist2_s.fig
- supplementary files/Matlab_code_for_Figure1/BER_by_DDE/仿真结果/BER_by_DDE_awgn_rate_1_2_dist2_s.txt
- supplementary files/Matlab_code_for_Figure1/BER_by_DDE/仿真结果/BER_by_DDE_rayl_rate_1_2_dist0_Ns.fig
- supplementary files/Matlab_code_for_Figure1/BER_by_DDE/仿真结果/BER_by_DDE_rayl_rate_1_2_dist0_Ns.txt
- supplementary files/Matlab_code_for_Figure1/BER_by_DDE/仿真结果/BER_by_DDE_rayl_rate_1_2_dist0_s.fig
- supplementary files/Matlab_code_for_Figure1/BER_by_DDE/仿真结果/BER_by_DDE_rayl_rate_1_2_dist0_s.txt
- supplementary files/Matlab_code_for_Figure1/BER_by_DDE/仿真结果/BER_by_DDE_rayl_rate_1_2_dist1_Ns.fig
- supplementary files/Matlab_code_for_Figure1/BER_by_DDE/仿真结果/BER_by_DDE_rayl_rate_1_2_dist1_Ns.txt
- supplementary files/Matlab_code_for_Figure1/BER_by_DDE/仿真结果/BER_by_DDE_rayl_rate_1_2_dist1_s.fig
- supplementary files/Matlab_code_for_Figure1/BER_by_DDE/仿真结果/BER_by_DDE_rayl_rate_1_2_dist1_s.txt
- supplementary files/Matlab_code_for_Figure1/BER_by_DDE/仿真结果/BER_by_DDE_rayl_rate_1_2_dist2_Ns.fig
- supplementary files/Matlab_code_for_Figure1/BER_by_DDE/仿真结果/BER_by_DDE_rayl_rate_1_2_dist2_Ns.txt
- supplementary files/Matlab_code_for_Figure1/BER_by_DDE/仿真结果/BER_by_DDE_rayl_rate_1_2_dist2_s.fig
- supplementary files/Matlab_code_for_Figure1/BER_by_DDE/仿真结果/BER_by_DDE_rayl_rate_1_2_dist2_s.txt
- supplementary files/Matlab_code_for_Figure1/BER_by_DDE/仿真结果/BER_by_DDE_rician_rate_1_2_dist0_Ns.fig
- supplementary files/Matlab_code_for_Figure1/BER_by_DDE/仿真结果/BER_by_DDE_rician_rate_1_2_dist0_Ns.txt
- supplementary files/Matlab_code_for_Figure1/BER_by_DDE/仿真结果/BER_by_DDE_rician_rate_1_2_dist0_s.fig
- supplementary files/Matlab_code_for_Figure1/BER_by_DDE/仿真结果/BER_by_DDE_rician_rate_1_2_dist0_s.txt
- supplementary files/Matlab_code_for_Figure1/BER_by_DDE/仿真结果/BER_by_DDE_rician_rate_1_2_dist1_Ns.fig
- supplementary files/Matlab_code_for_Figure1/BER_by_DDE/仿真结果/BER_by_DDE_rician_rate_1_2_dist1_Ns.txt
- supplementary files/Matlab_code_for_Figure1/BER_by_DDE/仿真结果/BER_by_DDE_rician_rate_1_2_dist1_s.fig
- supplementary files/Matlab_code_for_Figure1/BER_by_DDE/仿真结果/BER_by_DDE_rician_rate_1_2_dist1_s.txt
- supplementary files/Matlab_code_for_Figure1/BER_by_DDE/仿真结果/BER_by_DDE_rician_rate_1_2_dist2_Ns.fig
- supplementary files/Matlab_code_for_Figure1/BER_by_DDE/仿真结果/BER_by_DDE_rician_rate_1_2_dist2_Ns.txt
- supplementary files/Matlab_code_for_Figure1/BER_by_DDE/仿真结果/BER_by_DDE_rician_rate_1_2_dist2_s.fig
- supplementary files/Matlab_code_for_Figure1/BER_by_DDE/仿真结果/BER_by_DDE_rician_rate_1_2_dist2_s.txt
- supplementary files/Matlab_code_for_Figure1/BER_by_DDE/仿真结果/BER_by_DDE_rician_sigma2_1_dist0_Ns.fig
- supplementary files/Matlab_code_for_Figure1/BER_by_DDE/仿真结果/BER_by_DDE_rician_sigma2_1_dist0_Ns.txt
- supplementary files/Matlab_code_for_Figure1/BER_by_DDE/仿真结果/BER_by_DDE_rician_sigma2_1_dist0_s.fig
- supplementary files/Matlab_code_for_Figure1/BER_by_DDE/仿真结果/BER_by_DDE_rician_sigma2_1_dist0_s.txt
- supplementary files/Matlab_code_for_Figure1/BER_by_DDE/仿真结果/Fig2_AWGN.eps
- supplementary files/Matlab_code_for_Figure1/BER_by_DDE/仿真结果/Fig3_Rician.eps
- supplementary files/Matlab_code_for_Figure1/BER_by_DDE/仿真结果/Fig4_Rayleigh.eps
- supplementary files/Matlab_code_for_Figure1/BER_by_DDE/仿真结果/Gene_fig_AWGN_omiga012_rate_1_2.m
- supplementary files/Matlab_code_for_Figure1/BER_by_DDE/仿真结果/Gene_fig_Rayleigh_omiga012_rate_1_2.m
- supplementary files/Matlab_code_for_Figure1/BER_by_DDE/仿真结果/Gene_fig_Rician_omiga012_rate_1_2.m
- supplementary files/Matlab_code_for_Figure1/BER_by_DDE/仿真结果/Rayleigh.fig
- supplementary files/Matlab_code_for_Figure1/BER_by_DDE/仿真结果/Rician.fig
- supplementary files/Matlab_code_for_Figure1/BER_by_DDE/仿真结果/低码率/
- supplementary files/Matlab_code_for_Figure1/BER_by_DDE/仿真结果/低码率/BER_by_DDE_rician_rate_1_6_098_dist0_Ns.txt
- supplementary files/Matlab_code_for_Figure1/BER_by_DDE/仿真结果/关键BER结果/
- supplementary files/Matlab_code_for_Figure1/BER_by_DDE/仿真结果/关键BER结果/Critical_BER_by_DDE_rate_090_099_dv3_5.txt
- supplementary files/Matlab_code_for_Figure1/BER_by_DDE/仿真结果/关键BER结果/Critical_BER_by_DDE_rate_090_dv3.txt
- supplementary files/Matlab_code_for_Figure1/BER_by_DDE/仿真结果/关键BER结果/Critical_BER_by_DDE_rate_090_dv4.txt
- supplementary files/Matlab_code_for_Figure1/BER_by_DDE/仿真结果/关键BER结果/Critical_BER_by_DDE_rate_090_dv5.txt
- supplementary files/Matlab_code_for_Figure1/BER_by_DDE/仿真结果/关键BER结果/Critical_BER_by_DDE_rate_095_dv3.txt
- supplementary files/Matlab_code_for_Figure1/BER_by_DDE/仿真结果/关键BER结果/Critical_BER_by_DDE_rate_095_dv4.txt
- supplementary files/Matlab_code_for_Figure1/BER_by_DDE/仿真结果/关键BER结果/Critical_BER_by_DDE_rate_095_dv5.txt
- supplementary files/Matlab_code_for_Figure1/BER_by_DDE/仿真结果/关键BER结果/Critical_BER_by_DDE_rate_098_dv3.txt
- supplementary files/Matlab_code_for_Figure1/BER_by_DDE/仿真结果/关键BER结果/Critical_BER_by_DDE_rate_098_dv4.txt
- supplementary files/Matlab_code_for_Figure1/BER_by_DDE/仿真结果/关键BER结果/Critical_BER_by_DDE_rate_098_dv5.txt
- supplementary files/Matlab_code_for_Figure1/BER_by_DDE/仿真结果/固定符号信噪比变码率比较/
- supplementary files/Matlab_code_for_Figure1/BER_by_DDE/仿真结果/固定符号信噪比变码率比较/BER_by_DDE_rician_sigma2_1_dist0_Ns.txt
- supplementary files/Matlab_code_for_Figure1/BER_by_DDE/仿真结果/固定符号信噪比变码率比较/BER_by_DDE_rician_sigma2_1_dist0_Ns_v1.txt
- supplementary files/Matlab_code_for_Figure1/BER_by_DDE/仿真结果/固定符号信噪比变码率比较/BER_by_DDE_rician_sigma2_1_dist0_s.txt
- supplementary files/Matlab_code_for_Figure1/BER_by_DDE/仿真结果/固定符号信噪比变码率比较/BER_by_DDE_rician_sigma2_1_dist0_s_v1.txt
- supplementary files/Matlab_code_for_Figure1/BER_by_DDE/仿真结果/固定符号信噪比变码率比较/comp_SR_NR_sigma2_1_rician.m
- supplementary files/Matlab_code_for_Figure1/BER_by_DDE/仿真结果/固定符号信噪比变码率比较/rician_fixed_Es_N0.fig
- supplementary files/Matlab_code_for_Figure1/BER_by_DDE/仿真结果/高斯近似消息比较/
- supplementary files/Matlab_code_for_Figure1/BER_by_DDE/仿真结果/高斯近似消息比较/BER_by_DDE_rician_rate_1_2_dist0_Ns_GA.txt
- supplementary files/Matlab_code_for_Figure1/BER_by_DDE/瑞利信道0518.fig
- supplementary files/Matlab_code_for_Figure1/BER_by_GA_EXIT/
- supplementary files/Matlab_code_for_Figure1/BER_by_GA_EXIT/ChNode_R2_first_fun.m
- supplementary files/Matlab_code_for_Figure1/BER_by_GA_EXIT/DDE_outcode.m
- supplementary files/Matlab_code_for_Figure1/BER_by_GA_EXIT/degree_edge_to_node.m
- supplementary files/Matlab_code_for_Figure1/BER_by_GA_EXIT/degree_node_to_edge.m
- supplementary files/Matlab_code_for_Figure1/BER_by_GA_EXIT/EXIT_BER_outcode.m
- supplementary files/Matlab_code_for_Figure1/BER_by_GA_EXIT/Find_critail_BER.m
- supplementary files/Matlab_code_for_Figure1/BER_by_GA_EXIT/GA_BER_outcode.m
- supplementary files/Matlab_code_for_Figure1/BER_by_GA_EXIT/Gene_Lookup_Table_for_ChNode_update.m
- supplementary files/Matlab_code_for_Figure1/BER_by_GA_EXIT/inv_Phi.m
- supplementary files/Matlab_code_for_Figure1/BER_by_GA_EXIT/Inv_Phi_sv.m
- supplementary files/Matlab_code_for_Figure1/BER_by_GA_EXIT/Jfunc.m
- supplementary files/Matlab_code_for_Figure1/BER_by_GA_EXIT/Jinv.m
- supplementary files/Matlab_code_for_Figure1/BER_by_GA_EXIT/main_GA_BER.m
- supplementary files/Matlab_code_for_Figure1/BER_by_GA_EXIT/main_GA_exit.m
- supplementary files/Matlab_code_for_Figure1/BER_by_GA_EXIT/main_GA_Mento_carl.m
- supplementary files/Matlab_code_for_Figure1/BER_by_GA_EXIT/main_GA_tradi.m
- supplementary files/Matlab_code_for_Figure1/BER_by_GA_EXIT/main_GA_two_type_msg.m
- supplementary files/Matlab_code_for_Figure1/BER_by_GA_EXIT/omiga_BEC_sigma1_GA_BEC.fig
- supplementary files/Matlab_code_for_Figure1/BER_by_GA_EXIT/Phi.m
- supplementary files/Matlab_code_for_Figure1/BER_by_GA_EXIT/Phi_small_mean.m
- supplementary files/Matlab_code_for_Figure1/BER_by_GA_EXIT/phi函数公式值与实际值的差.fig
- supplementary files/Matlab_code_for_Figure1/BER_by_GA_EXIT/Quan_fun2.m
- supplementary files/Matlab_code_for_Figure1/BER_by_GA_EXIT/Q_ray.m
- supplementary files/Matlab_code_for_Figure1/BER_by_GA_EXIT/Q_ray_inv.m
- supplementary files/Matlab_code_for_Figure1/BER_by_GA_EXIT/relationship_alpha_pe_Iec.m
- supplementary files/Matlab_code_for_Figure1/BER_by_GA_EXIT/test.txt
- supplementary files/Matlab_code_for_Figure1/BER_by_GA_EXIT/test_keshan.m
- supplementary files/Matlab_code_for_Figure1/BER_by_GA_EXIT/VarNode_conv.m
- supplementary files/Matlab_code_for_Figure1/BER_by_GA_EXIT/var_nodes_index_gen.m
- supplementary files/Matlab_code_for_Figure1/BER_by_GA_EXIT/x_small.mat
- supplementary files/Matlab_code_for_Figure1/BER_by_GA_EXIT/y_small.mat
- supplementary files/Matlab_code_for_Figure1/BER_by_GA_EXIT/实际值与公式计算的phi函数值.fig
- supplementary files/Matlab_code_for_Figure1/BER_by_GA_mean/
- supplementary files/Matlab_code_for_Figure1/BER_by_GA_mean/C2_BPSK.m
- supplementary files/Matlab_code_for_Figure1/BER_by_GA_mean/degree_edge_to_node.m
- supplementary files/Matlab_code_for_Figure1/BER_by_GA_mean/degree_node_to_edge.m
- supplementary files/Matlab_code_for_Figure1/BER_by_GA_mean/fd_fun.m
- supplementary files/Matlab_code_for_Figure1/BER_by_GA_mean/f_j_mu.m
- supplementary files/Matlab_code_for_Figure1/BER_by_GA_mean/gene_rsd_dist.m
- supplementary files/Matlab_code_for_Figure1/BER_by_GA_mean/gen_check_dist.m
- supplementary files/Matlab_code_for_Figure1/BER_by_GA_mean/initial_message.m
- supplementary files/Matlab_code_for_Figure1/BER_by_GA_mean/inv_Phi.m
- supplementary files/Matlab_code_for_Figure1/BER_by_GA_mean/keshan.m
- supplementary files/Matlab_code_for_Figure1/BER_by_GA_mean/keshan2.m
- supplementary files/Matlab_code_for_Figure1/BER_by_GA_mean/keshan3.m
- supplementary files/Matlab_code_for_Figure1/BER_by_GA_mean/keshan4.m
- supplementary files/Matlab_code_for_Figure1/BER_by_GA_mean/linear_prog_LT.m
- supplementary files/Matlab_code_for_Figure1/BER_by_GA_mean/Main_GA.m
- supplementary files/Matlab_code_for_Figure1/BER_by_GA_mean/Main_GA_AWGN_with_erasures.m
- supplementary files/Matlab_code_for_Figure1/BER_by_GA_mean/Phi.m
- supplementary files/Matlab_code_for_Figure1/BER_by_GA_mean/simu_Fig5_Fig6.m
- supplementary files/Matlab_code_for_Figure1/BER_by_GA_mean/test_simu.m
- supplementary files/Matlab_code_for_Figure1/BER_by_Simulation/
- supplementary files/Matlab_code_for_Figure1/BER_by_Simulation/Gpois.m
- supplementary files/Matlab_code_for_Figure1/BER_by_Simulation/Grsd.m
- supplementary files/Matlab_code_for_Figure1/BER_by_Simulation/G_LT_fixed_14700.mat
- supplementary files/Matlab_code_for_Figure1/BER_by_Simulation/G_LT_fixed_19600.mat
- supplementary files/Matlab_code_for_Figure1/BER_by_Simulation/G_LT_fixed_29400.mat
- supplementary files/Matlab_code_for_Figure1/BER_by_Simulation/H_pre_fixed.mat
- supplementary files/Matlab_code_for_Figure1/BER_by_Simulation/H_pre_good.mat
- supplementary files/Matlab_code_for_Figure1/BER_by_Simulation/Linear_time_PEG.m
- supplementary files/Matlab_code_for_Figure1/BER_by_Simulation/Linear_time_PEG_get_word.m
- supplementary files/Matlab_code_for_Figure1/BER_by_Simulation/Linear_time_regular_Possion.m
- supplementary files/Matlab_code_for_Figure1/BER_by_Simulation/Log_SP_decode.m
- supplementary files/Matlab_code_for_Figure1/BER_by_Simulation/LT_soft_decode.m
- supplementary files/Matlab_code_for_Figure1/BER_by_Simulation/Main_LT_enc_dec.m
- supplementary files/Matlab_code_for_Figure1/BER_by_Simulation/Main_Raptor_enc_dec.m
- supplementary files/Matlab_code_for_Figure1/BER_by_Simulation/Raptor_encode_weak_distr.m
- supplementary files/Matlab_code_for_Figure1/BER_by_Simulation/Raptor_encode_weak_distr1.m
- supplementary files/Matlab_code_for_Figure1/BER_by_Simulation/rayleigh_sigma2_1.fig
- supplementary files/Matlab_code_for_Figure1/BER_by_Simulation/removal_g4c_for_LPEG.m
- supplementary files/Matlab_code_for_Figure1/BER_by_Simulation/sys_LT_Log_SP_decode.m
- supplementary files/Matlab_code_for_Figure1/BER_by_Simulation/实际码字结果/
- supplementary files/Matlab_code_for_Figure1/BER_by_Simulation/实际码字结果/20190816结果.zip
- supplementary files/Matlab_code_for_Figure1/BER_by_Simulation/实际码字结果/AWGN_dist2016977_K10000_S.txt
- supplementary files/Matlab_code_for_Figure1/BER_by_Simulation/实际码字结果/AWGN_dist2016977_K10000_S_detail.txt
- supplementary files/Matlab_code_for_Figure1/BER_by_Simulation/实际码字结果/AWGN_dist2016977_K10000_S_detail2.txt
- supplementary files/Matlab_code_for_Figure1/BER_by_Simulation/实际码字结果/AWGN_dist2016977_K1960_S.txt
- supplementary files/Matlab_code_for_Figure1/BER_by_Simulation/实际码字结果/AWGN_dist2016977_K4900_S.txt
- supplementary files/Matlab_code_for_Figure1/BER_by_Simulation/实际码字结果/AWGN_dist2016977_K9800_S.txt
- supplementary files/Matlab_code_for_Figure1/BER_by_Simulation/实际码字结果/AWGN_dist2016977_K9800_S_part2.txt
- supplementary files/Matlab_code_for_Figure1/BER_by_Simulation/实际码字结果/AWGN_dist2018033_K10000_S.txt
- supplementary files/Matlab_code_for_Figure1/BER_by_Simulation/实际码字结果/AWGN_dist2018033_K10000_S_part2.txt
- supplementary files/Matlab_code_for_Figure1/BER_by_Simulation/实际码字结果/AWGN_dist2018033_K10000_S_part3.txt
- supplementary files/Matlab_code_for_Figure1/BER_by_Simulation/实际码字结果/AWGN_dist201912973_K10000_S.txt
- supplementary files/Matlab_code_for_Figure1/BER_by_Simulation/实际码字结果/AWGN_dist201912973_K10000_S_iter100.txt
- supplementary files/Matlab_code_for_Figure1/BER_by_Simulation/实际码字结果/AWGN_dist201912973_K10000_S_iter100_part2.txt
- supplementary files/Matlab_code_for_Figure1/BER_by_Simulation/实际码字结果/AWGN_dist201912973_K10000_S_iter100_part3.txt
- supplementary files/Matlab_code_for_Figure1/BER_by_Simulation/实际码字结果/AWGN_dist2019298_K10000_S.txt
- supplementary files/Matlab_code_for_Figure1/BER_by_Simulation/实际码字结果/AWGN_dist2019298_K10000_S_part2.txt
- supplementary files/Matlab_code_for_Figure1/BER_by_Simulation/实际码字结果/AWGN_dist2019298_K10000_S_part3.txt
- supplementary files/Matlab_code_for_Figure1/Figure1.fig
- supplementary files/Matlab_code_for_Figure1/Gene_Fig1.m
- supplementary files/Matlab_code_for_Figure1/Readme.txt
- supplementary files/Matlab_code_for_Figure2/
- supplementary files/Matlab_code_for_Figure2/aita_from_alpha.m
- supplementary files/Matlab_code_for_Figure2/degree_edge_to_node.m
- supplementary files/Matlab_code_for_Figure2/degree_node_to_edge.m
- supplementary files/Matlab_code_for_Figure2/Figure2.fig
- supplementary files/Matlab_code_for_Figure2/Get_Pe_from_alpha_Iec.m
- supplementary files/Matlab_code_for_Figure2/global_opt.m
- supplementary files/Matlab_code_for_Figure2/Jfunc.m
- supplementary files/Matlab_code_for_Figure2/Jinv.m
- supplementary files/Matlab_code_for_Figure2/linear_prog_LT.m
- supplementary files/Matlab_code_for_Figure2/PE.m
- supplementary files/Matlab_code_for_Figure2/PE_ray.m
- supplementary files/Matlab_code_for_Figure2/Q_naka.m
- supplementary files/Matlab_code_for_Figure2/Q_naka_inv.m
- supplementary files/Matlab_code_for_Figure2/Q_ray.m
- supplementary files/Matlab_code_for_Figure2/Q_ray_inv.m
- supplementary files/Matlab_code_for_Figure2/Readme.txt
- supplementary files/Matlab_code_for_Figure2/results_para_from_linear_prog_LT.m
- supplementary files/Matlab_code_for_Figure3/
- supplementary files/Matlab_code_for_Figure3/ChNode_R2_first_fun.m
- supplementary files/Matlab_code_for_Figure3/DDE_outcode.m
- supplementary files/Matlab_code_for_Figure3/degree_edge_to_node.m
- supplementary files/Matlab_code_for_Figure3/degree_node_to_edge.m
- supplementary files/Matlab_code_for_Figure3/EXIT_BER_outcode.m
- supplementary files/Matlab_code_for_Figure3/Figure3.fig
- supplementary files/Matlab_code_for_Figure3/Find_critail_BER.m
- supplementary files/Matlab_code_for_Figure3/GA_BER_outcode.m
- supplementary files/Matlab_code_for_Figure3/Gene_Fig3.m
- supplementary files/Matlab_code_for_Figure3/Gene_Lookup_Table_for_ChNode_update.m
- supplementary files/Matlab_code_for_Figure3/inv_Phi.m
- supplementary files/Matlab_code_for_Figure3/Inv_Phi_sv.m
- supplementary files/Matlab_code_for_Figure3/Jfunc.m
- supplementary files/Matlab_code_for_Figure3/Jinv.m
- supplementary files/Matlab_code_for_Figure3/main_GA_BER.m
- supplementary files/Matlab_code_for_Figure3/main_GA_exit.m
- supplementary files/Matlab_code_for_Figure3/main_GA_Mento_carl.m
- supplementary files/Matlab_code_for_Figure3/main_GA_tradi.m
- supplementary files/Matlab_code_for_Figure3/main_GA_two_type_msg.m
- supplementary files/Matlab_code_for_Figure3/omiga_BEC_sigma1_GA_BEC.fig
- supplementary files/Matlab_code_for_Figure3/Phi.m
- supplementary files/Matlab_code_for_Figure3/Phi_small_mean.m
- supplementary files/Matlab_code_for_Figure3/phi函数公式值与实际值的差.fig
- supplementary files/Matlab_code_for_Figure3/Quan_fun2.m
- supplementary files/Matlab_code_for_Figure3/Q_ray.m
- supplementary files/Matlab_code_for_Figure3/Q_ray_inv.m
- supplementary files/Matlab_code_for_Figure3/relationship_alpha_pe_Iec.m
- supplementary files/Matlab_code_for_Figure3/test.txt
- supplementary files/Matlab_code_for_Figure3/test_keshan.m
- supplementary files/Matlab_code_for_Figure3/VarNode_conv.m
- supplementary files/Matlab_code_for_Figure3/var_nodes_index_gen.m
- supplementary files/Matlab_code_for_Figure3/x_small.mat
- supplementary files/Matlab_code_for_Figure3/y_small.mat
- supplementary files/Matlab_code_for_Figure3/实际值与公式计算的phi函数值.fig
- supplementary files/Matlab_code_for_Figure4_and_5/
- supplementary files/Matlab_code_for_Figure4_and_5/AWGN_dist20182_K10000_S.txt
- supplementary files/Matlab_code_for_Figure4_and_5/AWGN_dist20182_K10000_S_part2.txt
- supplementary files/Matlab_code_for_Figure4_and_5/AWGN_dist2019298_K10000_S.txt
- supplementary files/Matlab_code_for_Figure4_and_5/AWGN_dist2019298_K10000_S_part2.txt
- supplementary files/Matlab_code_for_Figure4_and_5/AWGN_dist2019298_K10000_S_part3.txt
- supplementary files/Matlab_code_for_Figure4_and_5/AWGN_dist2019_K10000_S.txt
- supplementary files/Matlab_code_for_Figure4_and_5/AWGN_dist202002_K10000_S.txt
- supplementary files/Matlab_code_for_Figure4_and_5/AWGN_dist202003_K10000_S.txt
- supplementary files/Matlab_code_for_Figure4_and_5/AWGN_dist202004_K10000_S.txt
- supplementary files/Matlab_code_for_Figure4_and_5/AWGN_sigma945_dist201805_K10000_N.txt
- supplementary files/Matlab_code_for_Figure4_and_5/AWGN_sigma945_dist201805_K10000_N2.txt
- supplementary files/Matlab_code_for_Figure4_and_5/AWGN_sigma945_dist2020096_K10000_S.txt
- supplementary files/Matlab_code_for_Figure4_and_5/AWGN_sigma945_dist2020096_K10000_S2.txt
- supplementary files/Matlab_code_for_Figure4_and_5/AWGN_sigma959_dist201805_K10000_N.txt
- supplementary files/Matlab_code_for_Figure4_and_5/AWGN_sigma959_dist201805_K10000_N2.txt
- supplementary files/Matlab_code_for_Figure4_and_5/AWGN_sigma959_dist202005_K10000_S_part2.txt
- supplementary files/Matlab_code_for_Figure4_and_5/Gpois.m
- supplementary files/Matlab_code_for_Figure4_and_5/Grsd.m
- supplementary files/Matlab_code_for_Figure4_and_5/G_LT_fixed_14700.mat
- supplementary files/Matlab_code_for_Figure4_and_5/G_LT_fixed_19600.mat
- supplementary files/Matlab_code_for_Figure4_and_5/G_LT_fixed_29400.mat
- supplementary files/Matlab_code_for_Figure4_and_5/H_pre_fixed.mat
- supplementary files/Matlab_code_for_Figure4_and_5/H_pre_good.mat
- supplementary files/Matlab_code_for_Figure4_and_5/Linear_time_PEG.m
- supplementary files/Matlab_code_for_Figure4_and_5/Linear_time_PEG_get_word.m
- supplementary files/Matlab_code_for_Figure4_and_5/Linear_time_regular_Possion.m
- supplementary files/Matlab_code_for_Figure4_and_5/Log_SP_decode.m
- supplementary files/Matlab_code_for_Figure4_and_5/LT_soft_decode.m
- supplementary files/Matlab_code_for_Figure4_and_5/Main_LT_enc_dec.m
- supplementary files/Matlab_code_for_Figure4_and_5/Main_Raptor_enc_dec.m
- supplementary files/Matlab_code_for_Figure4_and_5/NLT_AWGN_OH_2_dist0_K10000.txt
- supplementary files/Matlab_code_for_Figure4_and_5/NLT_AWGN_OH_2_dist0_K4000.txt
- supplementary files/Matlab_code_for_Figure4_and_5/NLT_AWGN_sig9786_dist1_K10000_modi.txt
- supplementary files/Matlab_code_for_Figure4_and_5/NLT_AWGN_sigma_1_dist0_K1000.txt
- supplementary files/Matlab_code_for_Figure4_and_5/PBI_rho07_dist2_100000.txt
- supplementary files/Matlab_code_for_Figure4_and_5/PBI_rho07_dist2_100000_t2.txt
- supplementary files/Matlab_code_for_Figure4_and_5/PBI_rho07_dist2_30000.txt
- supplementary files/Matlab_code_for_Figure4_and_5/PBI_rho07_dist2_4000.txt
- supplementary files/Matlab_code_for_Figure4_and_5/PBI_rho07_dist2_65000.txt
- supplementary files/Matlab_code_for_Figure4_and_5/PBI_rho07_dist3.txt
- supplementary files/Matlab_code_for_Figure4_and_5/PBI_rho0_dist2019_10000.txt
- supplementary files/Matlab_code_for_Figure4_and_5/Raptor_encode_weak_distr.m
[truncated: 30 more entries]
