# Supplementary material for: An Efficient Design of Systematic Rateless Codes
Source: Hindawi journal article supplement (doi:10.1155/2020/8068414), 2020-05-19
Supplement: f1 [file 8068414.f1.zip › supplementary files/Matlab_code_for_Figure1/BER_by_DDE/BER_by_DDE_awgn_sigma2_1_dist0_Ns.txt]

ÐÅµÀÎªAWGNÐÅµÀ

overhead_vec =

  1 ÖÁ 5 ÁÐ

   1.500000000000000   1.600000000000000   1.700000000000000   1.800000000000000   1.900000000000000

  6 ÖÁ 10 ÁÐ

   2.000000000000000   2.100000000000000   2.200000000000000   2.300000000000000   2.400000000000000

  11 ÖÁ 15 ÁÐ

   2.500000000000000   2.600000000000000   2.700000000000000   2.800000000000000   2.900000000000000

  16 ÁÐ

   3.000000000000000


inner_code_rate =

  1 ÖÁ 5 ÁÐ

   0.666666666666667   0.625000000000000   0.588235294117647   0.555555555555556   0.526315789473684

  6 ÖÁ 10 ÁÐ

   0.500000000000000   0.476190476190476   0.454545454545455   0.434782608695652   0.416666666666667

  11 ÖÁ 15 ÁÐ

   0.400000000000000   0.384615384615385   0.370370370370370   0.357142857142857   0.344827586206897

  16 ÁÐ

   0.333333333333333


code_rate_vec =

  1 ÖÁ 5 ÁÐ

   0.653333333333333   0.612500000000000   0.576470588235294   0.544444444444445   0.515789473684210

  6 ÖÁ 10 ÁÐ

   0.490000000000000   0.466666666666667   0.445454545454545   0.426086956521739   0.408333333333333

  11 ÖÁ 15 ÁÐ

   0.392000000000000   0.376923076923077   0.362962962962963   0.350000000000000   0.337931034482759

  16 ÁÐ

   0.326666666666667


sigma2 =

     1


EsN0indB =

  -3.010299956639812


EbN0indB_vec =

  1 ÖÁ 5 ÁÐ

  -1.161648123007948  -0.881360887005513  -0.618071499782022  -0.369835662531700  -0.135024704036471

  6 ÖÁ 10 ÁÐ

   0.087739243075052   0.299632233774433   0.501666094657302   0.694717646611168   0.879551703551300

  11 ÖÁ 15 ÁÐ

   1.056839373155615   1.227172766143420   1.391076928025113   1.549019599857432   1.701419265424800

  16 ÁÐ

   1.848651833631864


distr_num =

     0

ÖÆ±í³É¹¦
µ±Ç°Ñ¡ÔñLTÂë
µ±Ç°Ñ¡Ôñ·ÇÏµÍ³Âë

out_node_index =

     1     2     3     4     5     8     9    19    65    66


ans =

  1 ÖÁ 5 ÁÐ

   0.007969000000000   0.493570000000000   0.166220000000000   0.072646000000000   0.082558000000000

  6 ÖÁ 10 ÁÐ

   0.056058000000000   0.037229000000000   0.055590000000000   0.025023000000000   0.003135000000000


inner_code_BER =

  1 ÖÁ 5 ÁÐ

   0.459152248131782                   0                   0                   0                   0

  6 ÖÁ 10 ÁÐ

                   0                   0                   0                   0                   0

  11 ÖÁ 15 ÁÐ

                   0                   0                   0                   0                   0

  16 ÁÐ

                   0


inner_code_BER =

  1 ÖÁ 5 ÁÐ

   0.459152248131782   0.442380720621527                   0                   0                   0

  6 ÖÁ 10 ÁÐ

                   0                   0                   0                   0                   0

  11 ÖÁ 15 ÁÐ

                   0                   0                   0                   0                   0

  16 ÁÐ

                   0


inner_code_BER =

  1 ÖÁ 5 ÁÐ

   0.459152248131782   0.442380720621527   0.416538043651084                   0                   0

  6 ÖÁ 10 ÁÐ

                   0                   0                   0                   0                   0

  11 ÖÁ 15 ÁÐ

                   0                   0                   0                   0                   0

  16 ÁÐ

                   0


inner_code_BER =

  1 ÖÁ 5 ÁÐ

   0.459152248131782   0.442380720621527   0.416538043651084   0.370709242618808                   0

  6 ÖÁ 10 ÁÐ

                   0                   0                   0                   0                   0

  11 ÖÁ 15 ÁÐ

                   0                   0                   0                   0                   0

  16 ÁÐ

                   0


inner_code_BER =

  1 ÖÁ 5 ÁÐ

   0.459152248131782   0.442380720621527   0.416538043651084   0.370709242618808   0.278939452575462

  6 ÖÁ 10 ÁÐ

                   0                   0                   0                   0                   0

  11 ÖÁ 15 ÁÐ

                   0                   0                   0                   0                   0

  16 ÁÐ

                   0


inner_code_BER =

  1 ÖÁ 5 ÁÐ

   0.459152248131782   0.442380720621527   0.416538043651084   0.370709242618808   0.278939452575462

  6 ÖÁ 10 ÁÐ

   0.137941576647608                   0                   0                   0                   0

  11 ÖÁ 15 ÁÐ

                   0                   0                   0                   0                   0

  16 ÁÐ

                   0


inner_code_BER =

  1 ÖÁ 5 ÁÐ

   0.459152248131782   0.442380720621527   0.416538043651084   0.370709242618808   0.278939452575462

  6 ÖÁ 10 ÁÐ

   0.137941576647608   0.028808591085451                   0                   0                   0

  11 ÖÁ 15 ÁÐ

                   0                   0                   0                   0                   0

  16 ÁÐ

                   0


inner_code_BER =

  1 ÖÁ 5 ÁÐ

   0.459152248131782   0.442380720621527   0.416538043651084   0.370709242618808   0.278939452575462

  6 ÖÁ 10 ÁÐ

   0.137941576647608   0.028808591085451   0.001832607744408                   0                   0

  11 ÖÁ 15 ÁÐ

                   0                   0                   0                   0                   0

  16 ÁÐ

                   0


inner_code_BER =

  1 ÖÁ 5 ÁÐ

   0.459152248131782   0.442380720621527   0.416538043651084   0.370709242618808   0.278939452575462

  6 ÖÁ 10 ÁÐ

   0.137941576647608   0.028808591085451   0.001832607744408   0.001109654377577                   0

  11 ÖÁ 15 ÁÐ

                   0                   0                   0                   0                   0

  16 ÁÐ

                   0


inner_code_BER =

  1 ÖÁ 5 ÁÐ

   0.459152248131782   0.442380720621527   0.416538043651084   0.370709242618808   0.278939452575462

  6 ÖÁ 10 ÁÐ

   0.137941576647608   0.028808591085451   0.001832607744408   0.001109654377577   0.000748016183384

  11 ÖÁ 15 ÁÐ

                   0                   0                   0                   0                   0

  16 ÁÐ

                   0


inner_code_BER =

  1 ÖÁ 5 ÁÐ

   0.459152248131782   0.442380720621527   0.416538043651084   0.370709242618808   0.278939452575462

  6 ÖÁ 10 ÁÐ

   0.137941576647608   0.028808591085451   0.001832607744408   0.001109654377577   0.000748016183384

  11 ÖÁ 15 ÁÐ

   0.000529436440258                   0                   0                   0                   0

  16 ÁÐ

                   0


inner_code_BER =

  1 ÖÁ 5 ÁÐ

   0.459152248131782   0.442380720621527   0.416538043651084   0.370709242618808   0.278939452575462

  6 ÖÁ 10 ÁÐ

   0.137941576647608   0.028808591085451   0.001832607744408   0.001109654377577   0.000748016183384

  11 ÖÁ 15 ÁÐ

   0.000529436440258   0.000385492334485                   0                   0                   0

  16 ÁÐ

                   0


inner_code_BER =

  1 ÖÁ 5 ÁÐ

   0.459152248131782   0.442380720621527   0.416538043651084   0.370709242618808   0.278939452575462

  6 ÖÁ 10 ÁÐ

   0.137941576647608   0.028808591085451   0.001832607744408   0.001109654377577   0.000748016183384

  11 ÖÁ 15 ÁÐ

   0.000529436440258   0.000385492334485   0.000285909620927                   0                   0

  16 ÁÐ

                   0


inner_code_BER =

  1 ÖÁ 5 ÁÐ

   0.459152248131782   0.442380720621527   0.416538043651084   0.370709242618808   0.278939452575462

  6 ÖÁ 10 ÁÐ

   0.137941576647608   0.028808591085451   0.001832607744408   0.001109654377577   0.000748016183384

  11 ÖÁ 15 ÁÐ

   0.000529436440258   0.000385492334485   0.000285909620927   0.000214797496448                   0

  16 ÁÐ

                   0


inner_code_BER =

  1 ÖÁ 5 ÁÐ

   0.459152248131782   0.442380720621527   0.416538043651084   0.370709242618808   0.278939452575462

  6 ÖÁ 10 ÁÐ

   0.137941576647608   0.028808591085451   0.001832607744408   0.001109654377577   0.000748016183384

  11 ÖÁ 15 ÁÐ

   0.000529436440258   0.000385492334485   0.000285909620927   0.000214797496448   0.000162893276428

  16 ÁÐ

                   0


inner_code_BER =

  1 ÖÁ 5 ÁÐ

   0.459152248131782   0.442380720621527   0.416538043651084   0.370709242618808   0.278939452575462

  6 ÖÁ 10 ÁÐ

   0.137941576647608   0.028808591085451   0.001832607744408   0.001109654377577   0.000748016183384

  11 ÖÁ 15 ÁÐ

   0.000529436440258   0.000385492334485   0.000285909620927   0.000214797496448   0.000162893276428

  16 ÁÐ

   0.000124405559257

Ê±¼äÒÑ¹ý 1800.569219 Ãë¡£
