# Supplementary material for: An Efficient Design of Systematic Rateless Codes
Source: Hindawi journal article supplement (doi:10.1155/2020/8068414), 2020-05-19
Supplement: f1 [file 8068414.f1.zip › supplementary files/Matlab_code_for_Figure1/BER_by_DDE/BER_by_DDE_awgn_sigma_n_977_dist2016977_s.txt]

ÐÅµÀÎªAWGNÐÅµÀ

overhead_vec =

  1 ÖÁ 5 ÁÐ

   0.600000000000000   0.700000000000000   0.800000000000000   0.900000000000000   1.000000000000000

  6 ÖÁ 10 ÁÐ

   1.100000000000000   1.200000000000000   1.300000000000000   1.400000000000000   1.500000000000000

  11 ÖÁ 15 ÁÐ

   1.600000000000000   1.700000000000000   1.800000000000000   1.900000000000000   2.000000000000000


inner_code_rate =

  1 ÖÁ 5 ÁÐ

   0.625000000000000   0.588235294117647   0.555555555555556   0.526315789473684   0.500000000000000

  6 ÖÁ 10 ÁÐ

   0.476190476190476   0.454545454545455   0.434782608695652   0.416666666666667   0.400000000000000

  11 ÖÁ 15 ÁÐ

   0.384615384615385   0.370370370370370   0.357142857142857   0.344827586206897   0.333333333333333


code_rate_vec =

  1 ÖÁ 5 ÁÐ

   0.612500000000000   0.576470588235294   0.544444444444445   0.515789473684210   0.490000000000000

  6 ÖÁ 10 ÁÐ

   0.466666666666667   0.445454545454545   0.426086956521739   0.408333333333333   0.392000000000000

  11 ÖÁ 15 ÁÐ

   0.376923076923077   0.362962962962963   0.350000000000000   0.337931034482759   0.326666666666667


sigma2 =

   0.954529000000000


EsN0indB =

  -2.808191231015273


EbN0indB_vec =

  1 ÖÁ 5 ÁÐ

  -0.679252161380974  -0.415962774157483  -0.167726936907162   0.067084021588068   0.289847968699590

  6 ÖÁ 10 ÁÐ

   0.501740959398971   0.703774820281840   0.896826372235706   1.081660429175838   1.258948098780154

  11 ÖÁ 15 ÁÐ

   1.429281491767958   1.593185653649651   1.751128325481971   1.903527991049339   2.050760559256402


distr_num =

     2.019298000000000e+03

ÖÆ±í³É¹¦
µ±Ç°Ñ¡ÔñLTÂë
µ±Ç°Ñ¡ÔñÏµÍ³Âë

out_node_degree =

  1 ÖÁ 5 ÁÐ

                   0                   0                   0                   0                   0

  6 ÖÁ 10 ÁÐ

   0.846815465372582   0.045038486769935                   0                   0                   0

  11 ÖÁ 15 ÁÐ

                   0                   0                   0                   0                   0

  16 ÖÁ 20 ÁÐ

                   0                   0                   0                   0                   0

  21 ÖÁ 25 ÁÐ

                   0                   0                   0                   0                   0

  26 ÖÁ 30 ÁÐ

                   0                   0                   0                   0                   0

  31 ÖÁ 35 ÁÐ

                   0                   0                   0                   0                   0

  36 ÖÁ 39 ÁÐ

                   0                   0   0.000613563333579   0.107532484523904

{²Ù×÷ÔÚÒÔÏÂ¹ý³ÌÖÐ±»ÓÃ»§ÖÕÖ¹ <a href="matlab:matlab.internal.language.introspective.errorDocCallback('ChNode_R2_first_fun', 'E:\Ñ§Êõ\ÂÛÎÄ\20190731ÏµÍ³ÂëÏà¸É·ÇÏà¸ÉGA»¥ÐÅÏ¢·½·¨\³ÌÐò\ÀëÉ¢ÃÜ¶È½ø»¯»ñÈ¡ÃÅÏÞÖµ\ChNode_R2_first_fun.m', 4)" style="font-weight:bold">ChNode_R2_first_fun</a> (<a href="matlab: opentoline('E:\Ñ§Êõ\ÂÛÎÄ\20190731ÏµÍ³ÂëÏà¸É·ÇÏà¸ÉGA»¥ÐÅÏ¢·½·¨\³ÌÐò\ÀëÉ¢ÃÜ¶È½ø»¯»ñÈ¡ÃÅÏÞÖµ\ChNode_R2_first_fun.m',4,0)">line 4</a>)


Î»ÖÃ <a href="matlab:matlab.internal.language.introspective.errorDocCallback('DDE_algo_main_fixed_EsN0', 'E:\Ñ§Êõ\ÂÛÎÄ\20190731ÏµÍ³ÂëÏà¸É·ÇÏà¸ÉGA»¥ÐÅÏ¢·½·¨\³ÌÐò\ÀëÉ¢ÃÜ¶È½ø»¯»ñÈ¡ÃÅÏÞÖµ\DDE_algo_main_fixed_EsN0.m', 231)" style="font-weight:bold">DDE_algo_main_fixed_EsN0</a> (<a href="matlab: opentoline('E:\Ñ§Êõ\ÂÛÎÄ\20190731ÏµÍ³ÂëÏà¸É·ÇÏà¸ÉGA»¥ÐÅÏ¢·½·¨\³ÌÐò\ÀëÉ¢ÃÜ¶È½ø»¯»ñÈ¡ÃÅÏÞÖµ\DDE_algo_main_fixed_EsN0.m',231,0)">line 231</a>)
            temp_pu(ii_index,:)=ChNode_R2_first_fun(ii_vec,jj_vec,startpoint_vec,ij_length_dist,temp_pu(ii_index-1,:),pv,delta);} 
DDE_algo_main_fixed_EsN0
