# Supplementary material for: An Efficient Design of Systematic Rateless Codes
Source: Hindawi journal article supplement (doi:10.1155/2020/8068414), 2020-05-19
Supplement: f1 [file 8068414.f1.zip › supplementary files/Matlab_code_for_Figure1/BER_by_DDE/BER_by_DDE_awgn_sigma_n_977_dist2019298_s.txt]

ÐÅµÀÎªAWGNÐÅµÀ

overhead_vec =

  1 ÖÁ 5 ÁÐ

   0.500000000000000   0.550000000000000   0.650000000000000   0.750000000000000   0.850000000000000

  6 ÖÁ 10 ÁÐ

   0.950000000000000   1.050000000000000   1.150000000000000   1.250000000000000   1.350000000000000

  11 ÖÁ 15 ÁÐ

   1.450000000000000   1.550000000000000   1.600000000000000   1.650000000000000   1.700000000000000

  16 ÖÁ 20 ÁÐ

   1.750000000000000   1.800000000000000   1.850000000000000   1.900000000000000   1.950000000000000

  21 ÁÐ

   2.000000000000000


inner_code_rate =

  1 ÖÁ 5 ÁÐ

   0.666666666666667   0.645161290322581   0.606060606060606   0.571428571428571   0.540540540540540

  6 ÖÁ 10 ÁÐ

   0.512820512820513   0.487804878048781   0.465116279069767   0.444444444444444   0.425531914893617

  11 ÖÁ 15 ÁÐ

   0.408163265306122   0.392156862745098   0.384615384615385   0.377358490566038   0.370370370370370

  16 ÖÁ 20 ÁÐ

   0.363636363636364   0.357142857142857   0.350877192982456   0.344827586206897   0.338983050847458

  21 ÁÐ

   0.333333333333333


code_rate_vec =

  1 ÖÁ 5 ÁÐ

   0.653333333333333   0.632258064516129   0.593939393939394   0.560000000000000   0.529729729729730

  6 ÖÁ 10 ÁÐ

   0.502564102564103   0.478048780487805   0.455813953488372   0.435555555555556   0.417021276595745

  11 ÖÁ 15 ÁÐ

   0.400000000000000   0.384313725490196   0.376923076923077   0.369811320754717   0.362962962962963

  16 ÖÁ 20 ÁÐ

   0.356363636363636   0.350000000000000   0.343859649122807   0.337931034482759   0.332203389830508

  21 ÁÐ

   0.326666666666667


sigma2 =

   0.954529000000000


EsN0indB =

  -2.808191231015273


EbN0indB_vec =

  1 ÖÁ 5 ÁÐ

  -0.959539397383409  -0.817135006237306  -0.545612545801159  -0.290071501077277  -0.048734703910083

  6 ÖÁ 10 ÁÐ

   0.179894125684958   0.397086622617321   0.603932611215832   0.801373193173403   0.990226634777141

  11 ÖÁ 15 ÁÐ

   1.171208855705103   1.344949816399330   1.429281491767958   1.512006751427857   1.593185653649651

  16 ÖÁ 20 ÁÐ

   1.672874950362404   1.751128325481971   1.827996612144881   1.903527991049339   1.977768171841408

  21 ÁÐ

   2.050760559256402


distr_num =

     2.016977000000000e+03

ÖÆ±í³É¹¦
µ±Ç°Ñ¡ÔñLTÂë
µ±Ç°Ñ¡ÔñÏµÍ³Âë

inner_code_BER =

  1 ÖÁ 5 ÁÐ

   0.136553447243601                   0                   0                   0                   0

  6 ÖÁ 10 ÁÐ

                   0                   0                   0                   0                   0

  11 ÖÁ 15 ÁÐ

                   0                   0                   0                   0                   0

  16 ÖÁ 20 ÁÐ

                   0                   0                   0                   0                   0

  21 ÁÐ

                   0


inner_code_BER =

  1 ÖÁ 5 ÁÐ

   0.136553447243601   0.134186136693468                   0                   0                   0

  6 ÖÁ 10 ÁÐ

                   0                   0                   0                   0                   0

  11 ÖÁ 15 ÁÐ

                   0                   0                   0                   0                   0

  16 ÖÁ 20 ÁÐ

                   0                   0                   0                   0                   0

  21 ÁÐ

                   0


inner_code_BER =

  1 ÖÁ 5 ÁÐ

   0.136553447243601   0.134186136693468   0.128680558898765                   0                   0

  6 ÖÁ 10 ÁÐ

                   0                   0                   0                   0                   0

  11 ÖÁ 15 ÁÐ

                   0                   0                   0                   0                   0

  16 ÖÁ 20 ÁÐ

                   0                   0                   0                   0                   0

  21 ÁÐ

                   0


inner_code_BER =

  1 ÖÁ 5 ÁÐ

   0.136553447243601   0.134186136693468   0.128680558898765   0.121608407468063                   0

  6 ÖÁ 10 ÁÐ

                   0                   0                   0                   0                   0

  11 ÖÁ 15 ÁÐ

                   0                   0                   0                   0                   0

  16 ÖÁ 20 ÁÐ

                   0                   0                   0                   0                   0

  21 ÁÐ

                   0


inner_code_BER =

  1 ÖÁ 5 ÁÐ

   0.136553447243601   0.134186136693468   0.128680558898765   0.121608407468063   0.111432247372588

  6 ÖÁ 10 ÁÐ

                   0                   0                   0                   0                   0

  11 ÖÁ 15 ÁÐ

                   0                   0                   0                   0                   0

  16 ÖÁ 20 ÁÐ

                   0                   0                   0                   0                   0

  21 ÁÐ

                   0


inner_code_BER =

  1 ÖÁ 5 ÁÐ

   0.136553447243601   0.134186136693468   0.128680558898765   0.121608407468063   0.111432247372588

  6 ÖÁ 10 ÁÐ

   0.089808205006294                   0                   0                   0                   0

  11 ÖÁ 15 ÁÐ

                   0                   0                   0                   0                   0

  16 ÖÁ 20 ÁÐ

                   0                   0                   0                   0                   0

  21 ÁÐ

                   0


inner_code_BER =

  1 ÖÁ 5 ÁÐ

   0.136553447243601   0.134186136693468   0.128680558898765   0.121608407468063   0.111432247372588

  6 ÖÁ 10 ÁÐ

   0.089808205006294   0.018720408784945                   0                   0                   0

  11 ÖÁ 15 ÁÐ

                   0                   0                   0                   0                   0

  16 ÖÁ 20 ÁÐ

                   0                   0                   0                   0                   0

  21 ÁÐ

                   0


inner_code_BER =

  1 ÖÁ 5 ÁÐ

   0.136553447243601   0.134186136693468   0.128680558898765   0.121608407468063   0.111432247372588

  6 ÖÁ 10 ÁÐ

   0.089808205006294   0.018720408784945   0.010903144617018                   0                   0

  11 ÖÁ 15 ÁÐ

                   0                   0                   0                   0                   0

  16 ÖÁ 20 ÁÐ

                   0                   0                   0                   0                   0

  21 ÁÐ

                   0


inner_code_BER =

  1 ÖÁ 5 ÁÐ

   0.136553447243601   0.134186136693468   0.128680558898765   0.121608407468063   0.111432247372588

  6 ÖÁ 10 ÁÐ

   0.089808205006294   0.018720408784945   0.010903144617018   0.006621243249686                   0

  11 ÖÁ 15 ÁÐ

                   0                   0                   0                   0                   0

  16 ÖÁ 20 ÁÐ

                   0                   0                   0                   0                   0

  21 ÁÐ

                   0


inner_code_BER =

  1 ÖÁ 5 ÁÐ

   0.136553447243601   0.134186136693468   0.128680558898765   0.121608407468063   0.111432247372588

  6 ÖÁ 10 ÁÐ

   0.089808205006294   0.018720408784945   0.010903144617018   0.006621243249686   0.000088981715292

  11 ÖÁ 15 ÁÐ

                   0                   0                   0                   0                   0

  16 ÖÁ 20 ÁÐ

                   0                   0                   0                   0                   0

  21 ÁÐ

                   0


inner_code_BER =

  1 ÖÁ 5 ÁÐ

   0.136553447243601   0.134186136693468   0.128680558898765   0.121608407468063   0.111432247372588

  6 ÖÁ 10 ÁÐ

   0.089808205006294   0.018720408784945   0.010903144617018   0.006621243249686   0.000088981715292

  11 ÖÁ 15 ÁÐ

   0.000046196825104                   0                   0                   0                   0

  16 ÖÁ 20 ÁÐ

                   0                   0                   0                   0                   0

  21 ÁÐ

                   0


inner_code_BER =

  1 ÖÁ 5 ÁÐ

   0.136553447243601   0.134186136693468   0.128680558898765   0.121608407468063   0.111432247372588

  6 ÖÁ 10 ÁÐ

   0.089808205006294   0.018720408784945   0.010903144617018   0.006621243249686   0.000088981715292

  11 ÖÁ 15 ÁÐ

   0.000046196825104   0.000025338963199                   0                   0                   0

  16 ÖÁ 20 ÁÐ

                   0                   0                   0                   0                   0

  21 ÁÐ

                   0


inner_code_BER =

  1 ÖÁ 5 ÁÐ

   0.136553447243601   0.134186136693468   0.128680558898765   0.121608407468063   0.111432247372588

  6 ÖÁ 10 ÁÐ

   0.089808205006294   0.018720408784945   0.010903144617018   0.006621243249686   0.000088981715292

  11 ÖÁ 15 ÁÐ

   0.000046196825104   0.000025338963199   0.000018982514824                   0                   0

  16 ÖÁ 20 ÁÐ

                   0                   0                   0                   0                   0

  21 ÁÐ

                   0


inner_code_BER =

  1 ÖÁ 5 ÁÐ

   0.136553447243601   0.134186136693468   0.128680558898765   0.121608407468063   0.111432247372588

  6 ÖÁ 10 ÁÐ

   0.089808205006294   0.018720408784945   0.010903144617018   0.006621243249686   0.000088981715292

  11 ÖÁ 15 ÁÐ

   0.000046196825104   0.000025338963199   0.000018982514824   0.000014292831241                   0

  16 ÖÁ 20 ÁÐ

                   0                   0                   0                   0                   0

  21 ÁÐ

                   0


inner_code_BER =

  1 ÖÁ 5 ÁÐ

   0.136553447243601   0.134186136693468   0.128680558898765   0.121608407468063   0.111432247372588

  6 ÖÁ 10 ÁÐ

   0.089808205006294   0.018720408784945   0.010903144617018   0.006621243249686   0.000088981715292

  11 ÖÁ 15 ÁÐ

   0.000046196825104   0.000025338963199   0.000018982514824   0.000014292831241   0.000010803439907

  16 ÖÁ 20 ÁÐ

                   0                   0                   0                   0                   0

  21 ÁÐ

                   0


inner_code_BER =

  1 ÖÁ 5 ÁÐ

   0.136553447243601   0.134186136693468   0.128680558898765   0.121608407468063   0.111432247372588

  6 ÖÁ 10 ÁÐ

   0.089808205006294   0.018720408784945   0.010903144617018   0.006621243249686   0.000088981715292

  11 ÖÁ 15 ÁÐ

   0.000046196825104   0.000025338963199   0.000018982514824   0.000014292831241   0.000010803439907

  16 ÖÁ 20 ÁÐ

   0.000008190970146                   0                   0                   0                   0

  21 ÁÐ

                   0


inner_code_BER =

  1 ÖÁ 5 ÁÐ

   0.136553447243601   0.134186136693468   0.128680558898765   0.121608407468063   0.111432247372588

  6 ÖÁ 10 ÁÐ

   0.089808205006294   0.018720408784945   0.010903144617018   0.006621243249686   0.000088981715292

  11 ÖÁ 15 ÁÐ

   0.000046196825104   0.000025338963199   0.000018982514824   0.000014292831241   0.000010803439907

  16 ÖÁ 20 ÁÐ

   0.000008190970146   0.000006225132829                   0                   0                   0

  21 ÁÐ

                   0


inner_code_BER =

  1 ÖÁ 5 ÁÐ

   0.136553447243601   0.134186136693468   0.128680558898765   0.121608407468063   0.111432247372588

  6 ÖÁ 10 ÁÐ

   0.089808205006294   0.018720408784945   0.010903144617018   0.006621243249686   0.000088981715292

  11 ÖÁ 15 ÁÐ

   0.000046196825104   0.000025338963199   0.000018982514824   0.000014292831241   0.000010803439907

  16 ÖÁ 20 ÁÐ

   0.000008190970146   0.000006225132829   0.000004739882162                   0                   0

  21 ÁÐ

                   0


inner_code_BER =

  1 ÖÁ 5 ÁÐ

   0.136553447243601   0.134186136693468   0.128680558898765   0.121608407468063   0.111432247372588

  6 ÖÁ 10 ÁÐ

   0.089808205006294   0.018720408784945   0.010903144617018   0.006621243249686   0.000088981715292

  11 ÖÁ 15 ÁÐ

   0.000046196825104   0.000025338963199   0.000018982514824   0.000014292831241   0.000010803439907

  16 ÖÁ 20 ÁÐ

   0.000008190970146   0.000006225132829   0.000004739882162   0.000003614547997                   0

  21 ÁÐ

                   0


inner_code_BER =

  1 ÖÁ 5 ÁÐ

   0.136553447243601   0.134186136693468   0.128680558898765   0.121608407468063   0.111432247372588

  6 ÖÁ 10 ÁÐ

   0.089808205006294   0.018720408784945   0.010903144617018   0.006621243249686   0.000088981715292

  11 ÖÁ 15 ÁÐ

   0.000046196825104   0.000025338963199   0.000018982514824   0.000014292831241   0.000010803439907

  16 ÖÁ 20 ÁÐ

   0.000008190970146   0.000006225132829   0.000004739882162   0.000003614547997   0.000002759791586

  21 ÁÐ

                   0


inner_code_BER =

  1 ÖÁ 5 ÁÐ

   0.136553447243601   0.134186136693468   0.128680558898765   0.121608407468063   0.111432247372588

  6 ÖÁ 10 ÁÐ

   0.089808205006294   0.018720408784945   0.010903144617018   0.006621243249686   0.000088981715292

  11 ÖÁ 15 ÁÐ

   0.000046196825104   0.000025338963199   0.000018982514824   0.000014292831241   0.000010803439907

  16 ÖÁ 20 ÁÐ

   0.000008190970146   0.000006225132829   0.000004739882162   0.000003614547997   0.000002759791586

  21 ÁÐ

   0.000002109289574

Ê±¼äÒÑ¹ý 2551.680408 Ãë¡£
