# Supplementary material for: An Efficient Design of Systematic Rateless Codes
Source: Hindawi journal article supplement (doi:10.1155/2020/8068414), 2020-05-19
Supplement: f1 [file 8068414.f1.zip › supplementary files/Matlab_code_for_Figure1/BER_by_DDE/BER_by_DDE_rician_rate_1_3_098_dist9_s.txt]

ÐÅµÀÎªAWGNÐÅµÀ

EbN0indB_vec =

     0

ÖÆ±í³É¹¦
µ±Ç°Ñ¡ÔñLTÂë
µ±Ç°Ñ¡Ôñ·ÇÏµÍ³Âë
×ÜÂëÂÊ=0.50000, ÍâÂëÂëÂÊ=1.00000, ÄÚÂëÂëÂÊ=0.50000

out_node_index =

     1     2     3     4     5     8     9    19    65    66


ans =

  1 ÖÁ 5 ÁÐ

   0.007969000000000   0.493570000000000   0.166220000000000   0.072646000000000   0.082558000000000

  6 ÖÁ 10 ÁÐ

   0.056058000000000   0.037229000000000   0.055590000000000   0.025023000000000   0.003135000000000

plot(v,pv)
plot(v,pu_init)
plot(pu)
plot(v,pu)
