# Supplementary material for: An Efficient Design of Systematic Rateless Codes
Source: Hindawi journal article supplement (doi:10.1155/2020/8068414), 2020-05-19
Supplement: f1 [file 8068414.f1.zip › supplementary files/Matlab_code_for_Figure1/BER_by_DDE/ChNode_R2_first_fun.m]

function pc=ChNode_R2_first_fun(ii_vec,jj_vec,startpoint_vec,ij_length_dist,pa,pb,delta)
pc=zeros(1,length(pa));
for v_index=1:length(pa)
    pc(v_index)=pa(ii_vec(startpoint_vec(v_index):startpoint_vec(v_index)+ij_length_dist(v_index)-1))*pb(jj_vec(startpoint_vec(v_index):startpoint_vec(v_index)+ij_length_dist(v_index)-1))';
end;
pc=pc*delta;
