# Supplementary material for: An Efficient Design of Systematic Rateless Codes
Source: Hindawi journal article supplement (doi:10.1155/2020/8068414), 2020-05-19
Supplement: f1 [file 8068414.f1.zip › supplementary files/Matlab_code_for_Figure1/BER_by_DDE/Copy_of_Gen_initial_message_BFSK_combL1_3.m]

%%%%%%%%% 20170524 ²úÉúBFSK L=1£¬3³õÊ¼ÏûÏ¢ ÔÚÍ¬Ò»¸öfigÎÄ¼þÖÐµÄÁ½¸ö×ÓÍ¼%%%%%%%%%%
clear;
clc;
close;
%%%%% ÐÅµÀ²ÎÊýÉèÖÃ   %%%%
modulation_way=1;   % 0:BPSK 1:BFSK  Ñ¡Ôñµ÷ÖÆ·½Ê½
epsilon_vec=0.5;      % ±»¸ÉÈÅµÄ¸ÅÂÊ
EbN0indB=20;        % ÐÅÔë±È
EbNjindB=8;         % ÐÅ¸É±È
include_noise=1;    % ÊÇ·ñ°üº¬±³¾°ÔëÉù
if modulation_way==0
combining_select=1    %  ¶ÔÓÚBFSK£¬Ñ¡Ôñ²»Í¬µÄºÏ²¢·½·¨¡ª¡ª1£ºMLºÏ²¢,2£ºMLºÏ²¢µÚÒ»ÖÖ½üËÆÊ½,3:MLºÏ²¢µÚ¶þÖÖ½üËÆ 4£ºÆ½·½ÂÉÏßÐÔºÏ²¢£¬5£º³Ë»ýºÏ²¢£¬
% diversity_level=1  % ·Ö¼¯¼¶Êý
end;
channel_mode=1      % 0: AWGNÐÅµÀ£¬1£ºricianÐÅµÀ£¬2£ºRayleighÐÅµÀ
if channel_mode==1
    gamma=10;        % ricianÐÅµÀÊ±µÄ²ÎÊý£¨Ö±Éä·ÖÁ¿ÓëÉ¢Éä·ÖÁ¿±ÈÖµ£©
elseif channel_mode==2
    gamma=0;
end;
code_rate=1/2;

rho=epsilon_vec;
%%%%%% ÏûÏ¢·¶Î§ÉèÖÃ  %%%%%%%%
delta=0.01;  %Á¿»¯¼ä¸ô
v_max=120;       % ·¶Î§²»ÄÜÌ«Ð¡£¬ÒòÎªµü´úºópvµÄ·Ö²¼»áÏò½Ï´óµÄvÖµ£¨Èç40-50£©¡°ÒÆ¶¯¡±£¬Ì«Ð¡µÄ»°»á¡°¸²¸Ç¡±²»È«
v_min=-20;
v_range=[v_min delta v_max];
v=[v_min:delta:v_max];

a_delta=0.01;
a_vec=[a_delta:a_delta:20];                                      % À³Ë¹»òÈðÀûÐÅµÀË¥ÂäÏµÊý²ÉÑùÖµ
[vv,aa]=meshgrid(v,a_vec);

%%%%%   ÐÅÔë±È ÐÅ¸É±È ¼ÆËã    %%%%%
EbN0=10^(EbN0indB/10);
Es=1;
Eb=Es/code_rate;
N0=Eb/EbN0;
sigma_0=sqrt(N0*Es/2);

EbNj=10^(EbNjindB/10);
Es=1;
Eb=Es/code_rate;
Nj=Eb/EbNj/rho;
sigma_j=sqrt(Nj*Es/2);     % ±»¸ÉÈÅ²¿·ÖµÄ¸ÉÈÅ±ê×¼²î
sigma=sqrt(sigma_j^2+sigma_0^2);   % ±»¸ÉÈÅ²¿·ÖµÄ¸ÉÈÅ+ÔëÉùÖ®ºÍµÄ±ê×¼²î


diversity_level=1;
        for jj=[1 3]
            combining_select=jj;
            [pv_init]=Get_Initial_BFSK_Message(EbNjindB,combining_select,diversity_level,rho,code_rate,v_range,EbN0indB);
            sum(pv_init)
            subplot(2,1,1);
            if jj==1
                hold on;plot(v,pv_init,'k');
            elseif jj==3
                hold on;plot(v,pv_init,'k--');
            end;
        end;
box;
legend('ML','PD/SL');
ylabel('PMF');
title('a')

diversity_level=3;
        for jj=[1 2 3]
            combining_select=jj;
            [pv_init]=Get_Initial_BFSK_Message(EbNjindB,combining_select,diversity_level,rho,code_rate,v_range,EbN0indB);
            sum(pv_init)
            subplot(2,1,2);
            if jj==1
                hold on;plot(v,pv_init,'k');
            elseif jj==2
                hold on;plot(v,pv_init,'k-.');
            elseif jj==3
                hold on;plot(v,pv_init,'k--');
            end;
        end;
box;
legend('ML','SL','PD');
ylabel('PMF');
title('b')
