# Supplementary material for: An Efficient Design of Systematic Rateless Codes
Source: Hindawi journal article supplement (doi:10.1155/2020/8068414), 2020-05-19
Supplement: f1 [file 8068414.f1.zip › supplementary files/Matlab_code_for_Figure1/BER_by_DDE/Cost_fun.m]

%%%%%%%%%%% 20170131  ²î·Ö½ø»¯ÖÐµÄ´ú¼Ûº¯Êý£¬ÊÇDiff_evol_mainµ÷ÓÃµÄº¯Êý  %%%%%%%%%%%%%%
function ber_end=Cost_fun(EbNjindB,EbN0indB,rho,code_rate,var_degree,ch_degree)
global delta;
global v_max;
global v_min;
global v_range;
global v;
global ii_vec;
global jj_vec;
global startpoint_vec;
global endpoint_vec;
global ij_length_dist;
 
if isempty(find(var_degree<0,1)) && isempty(find(var_degree>=1,1)) && isempty(find(ch_degree<0,1)) && isempty(find(ch_degree>=1,1))   % Ö»ÓÐÂú×ãÒªÇóµÄ·Ö²¼²ÅÐèÒª½øÐÐÃÜ¶È½ø»¯
else
    ber_end=1;
    return;
end;
%%%%% ÐÅµÀ²ÎÊýÉèÖÃ   %%%%
modulation_way=0;   % 0:BPSK 1:BFSK  Ñ¡Ôñµ÷ÖÆ·½Ê½
% EbN0indB=20;        % ÐÅÔë±È
include_noise=1;    % ÊÇ·ñ°üº¬±³¾°ÔëÉù
if modulation_way==1
combining_select=1    %  ¶ÔÓÚBFSK£¬Ñ¡Ôñ²»Í¬µÄºÏ²¢·½·¨¡ª¡ª1£ºMLºÏ²¢,2£ºMLºÏ²¢µÚÒ»ÖÖ½üËÆÊ½,3:MLºÏ²¢µÚ¶þÖÖ½üËÆ 4£ºÆ½·½ÂÉÏßÐÔºÏ²¢£¬5£º³Ë»ýºÏ²¢£¬
diversity_level=1  % ·Ö¼¯¼¶Êý
end;

%%%%% Ëã·¨²ÎÊýÉèÖÃ   %%%%
% init_EbNj=2;            % µü´úÖÐµÄ³õÊ¼ÐÅ¸É±È£¬ËæÒâÉè£¬Èç¹û½Ó½üÃÅÏÞÖµÐèÒªµÄÑ­»·´ÎÊý»áÉÙÒ»Ð©
% Precise=0.001;         % µü´úÖÐÃÅÏÞ¾«¶È£¨ÐÅ¸É±ÈÉÏÏÂ½çÖ®²îÐ¡ÓÚ¸ÃÖµ£¬ÉÏ½ç×÷ÎªÃÅÏÞÖµ£©
% Threshold_vec=-10*ones(1,length(epsilon_vec));    %  ¼ÇÂ¼¹ý³ÌÃÅÏÞÖµ
iter_max=1000; % Ëã·¨ÖÐÃ¿¸öÐÅ¸É±ÈÏÂµÄ×î´óµü´ú´ÎÊý
pe_limit=10^-8; % Ä¿±êÎóÂëÂÊ£¬µü´úÖÐÐ¡ÓÚËü¼´ÈÏÎªµ½´ïµ±Ç°¾«¶ÈµÄÃÅÏÞ


%%%%% Âë×Ö²ÎÊýÉèÖÃ   %%%%
% code_rate=1/2;     % ÂëÂÊ
% isirregular=0;     % ¹æÔòÂë£º0£¬ ²»¹æÔòÂë£º1
% if isirregular==0
% dl=3;dr=6;                                                                      % ¹æÔòÂë×ÖµÄ¶È·Ö²¼
% var_index=[3];
% var_degree=[0 0 1];
% ch_index=[6];
% ch_degree=[0 0 0 0 0 1];    
% code_rate=1-sum(ch_degree(ch_index)./ch_index)/sum(var_degree(var_index)./var_index);
% else
%   dl=10;dr=6;
dl=length(var_degree);dr=length(ch_degree);
% var_index=find(var_degree>0);ch_index=find(ch_degree>0);
% var_index=[2:length(var_degree)];
% ch_index=[2:length(ch_degree)];
% code_rate=1-sum(ch_degree(ch_index)./ch_index)/sum(var_degree(var_index)./var_index);
% end;
%%%%% ÖØÒª²ÎÊýÖµ´òÓ¡  %%%%%%
% if modulation_way==0
% fprintf('µ÷ÖÆ·½Ê½ÎªBPSK\n');
% elseif modulation_way==1
% fprintf('µ÷ÖÆ·½Ê½ÎªBFSK\n');
% end;
% fprintf('ÐÅÔë±ÈÎª%2.2fdB\n',EbN0indB);
% fprintf('ÃÅÏÞ¾«¶ÈÎª%2.5fdB\n',Precise);
% 
% fprintf('Á¿»¯·¶Î§Îª%dÖÁ%d ,¾«¶ÈÎª%2.5f\n',v_min,v_max,delta);
% 
% if isirregular==0
%     fprintf('µ±Ç°Ñ¡ÔñµÄÊÇ¹æÔòÂë\n');
%     fprintf('±äÁ¿½Úµã¶ÈÊýÎª%d,Ð£Ñé½Úµã¶ÈÊýÎª%d\n',dl,dr);
% elseif isirregular==1
%     fprintf('µ±Ç°Ñ¡ÔñµÄÊÇ²»¹æÔòÂë\n')
% end;


%%%%%%%%%%%%%%%%%%%%%%  Ëã·¨²¿·Ö %%%%%%%%%%%%%%%%%%%%%%%%%%%%%%%%%
%%%%%%% ÓÃÓÚ×éºÏÊýµÄ¼ÆËã£¬ÎªºóÃæ×ö×¼±¸
% for jj=ch_index        
%     for k=1:jj-1
%         C_choose_num(jj,k)=nchoosek(jj-1,k);
%     end;
% end;

% ber_mat=zeros(length(epsilon_vec),length(EbNj_vec));

%%% µÃµ½Î´±»¸ÉÈÅµÄÏûÏ¢µÄ³õÊ¼·Ö²¼pvn_init  %%%
EbN0=10^(EbN0indB/10);
Es=1;
Eb=Es/code_rate;
N0=Eb/EbN0;
sigma_0=sqrt(N0*Es/2);     % ÔëÉù±ê×¼²î
if modulation_way==0
     pvn_init=sigma_0/sqrt(8*pi)*exp(-(2-sigma_0^2*v).^2/8/sigma_0^2);   %   Î´±»¸ÉÈÅµ«ÓÐÔëÉùµÄ³õÊ¼ÏûÏ¢±äÁ¿½ÚµãÏûÏ¢
else
    [pvn_init,pvn_init_mean]=Get_Initial_Message(EbN0indB,combining_select,diversity_level,1,code_rate,v_range,gene_graph,EbN0indB,0); 
end;
% if abs(sum(pvn_init)*delta-1)>0.001    %%% Èç¹û³¬³öµ±Ç°²ÉÑù·¶Î§Ôò±¨´í
%     fprintf('Î´¸ÉÈÅÏûÏ¢·Ö²¼·¶Î§¹ýÐ¡£¬ÐèÒªµ÷Õû,µ±Ç°ÐÅÔë±È=%2.2fdB£¬ÂëÂÊ=%2.2f\n',EbN0indB,code_rate);
%     pvn_init(end)=(1-sum(pvn_init(1:end-1)*delta))/delta;
% end;

%%%%%%%%%%%%%%%%%%%%%%%%%%%%%%%%%%%%%%%%%%%%%
        epsilon=rho;          %  ÓÃepsilon±íÊ¾rho,Èç¹ûÊÇ±ê×¼µÄDDEËã·¨£¬ÔÚºóÃæ½«epsilonÉèÎªÁË1£¬ËùÒÔÕâÀïÒªÖØÐÂ¸³Öµ¡£
        EbNj=10^(EbNjindB/10);
        Es=1;
        Eb=Es/code_rate;
        Nj=Eb/EbNj/rho;
        sigma_j=sqrt(Nj*Es/2);     % ±»¸ÉÈÅ²¿·ÖµÄ¸ÉÈÅ±ê×¼²î
        sigma=sqrt(sigma_j^2+include_noise*sigma_0^2);   % ±»¸ÉÈÅ²¿·ÖµÄ¸ÉÈÅ+ÔëÉùÖ®ºÍµÄ±ê×¼²î
        
%%% µÃµ½±»¸ÉÈÅµÄÏûÏ¢µÄ³õÊ¼·Ö²¼pv_init  %%%
if modulation_way==0
     pvj_init=sigma/sqrt(8*pi)*exp(-(2-sigma^2*v).^2/8/sigma^2);    %  ±»¸ÉÈÅ²¿·ÖµÄ³õÊ¼±äÁ¿½ÚµãÏûÏ¢
else
    [pvj_init,pv_init_mean]=Get_Initial_Message(EbNjindB,combining_select,diversity_level,rho,code_rate,v_range,gene_graph,EbN0indB,include_noise); 
end;

%%%%%%%%%%%%%%%%%%%%%%%%%%%%%%%%%%%%%%%%%%
   pv_init=epsilon*pvj_init+(1-epsilon)*pvn_init;
%%%  µü´úÇ°µÄ³õÊ¼»¯   %%%
pv=pv_init;
ber=zeros(1,iter_max);               % Ã¿´Îµü´úµÄÎóÂëÂÊ
%%% ½øÐÐµü´ú %%%
for iter_index=1:iter_max    
    %%%%%%%%  Ð£Ñé½ÚµãµÄPMF×ª»»  %%%%%%%%
        temp_pu=[zeros(1,length(v));pv;zeros(dr-2,length(v))];    % ×î¶àÓÐdrÖÖ¶ÈÊý£¬²ÎÓëÐ£Ñé½ÚµãÀ´Ô´ÏûÏ¢×î¶àdr-1¸ö£¬ÐèÒªµÄRÔËËãÎªdr-2´Î£¬¶ÈÊýÎª1µÄ½ÚµãÃ»ÓÐÊä³ö£¬¶ÈÊýÎª2µÄ½ÚµãÊä³ö¾ÍÊÇpv
        for ii_index=3:dr     % À´Ô´±ßÓÐ2ÖÁdc-1¸ö²»È·¶¨ÏûÏ¢Ê±µÄÊä³öÏûÏ¢£¬Ã¿´ÎÑ­»·ÄÜ¼ÆËãÒ»ÖÖÇé¿ö£¬¶ÔÓ¦ÓÚtemp_puÖÐµÄÒ»ÐÐ
            temp_pu(ii_index,:)=ChNode_R2_first_fun(ii_vec,jj_vec,startpoint_vec,ij_length_dist,temp_pu(ii_index-1,:),pv,delta);
        end;
        pu=ch_degree*temp_pu;

    %%%%%%%%%%%%%%%%%%%%%%%%%%%%%%%%%
    %%%%%% ±äÁ¿½ÚµãµÄPMF×ª»» %%%%%%%%%
    temp_pv=zeros(dl,length(v));    % ×î¶àÓÐdlÖÖ¶ÈÊý£¬ÆäÖÐÇÒ¿Ï¶¨Ã»ÓÐ¶ÈÊýÎª1µÄ½Úµã
    for ii_index=2:dl
        temp_pv(ii_index,:)=VarNode_conv(pv_init,pu,ii_index,v,delta);
    end;
    pv=var_degree*temp_pv;
    pv=pv/sum(pv)/delta;
    
    ber(iter_index)=(sum(pv(1:abs(v_min/delta)))+0.5*pv(abs(v_min/delta)+1))*delta;
    
%     if ber(iter_index)<pe_limit
%         break;
%     end;
     
end;    % for iter_index=1:iter_max  

ber_end=ber(end);
