# Supplementary material for: An Efficient Design of Systematic Rateless Codes
Source: Hindawi journal article supplement (doi:10.1155/2020/8068414), 2020-05-19
Supplement: f1 [file 8068414.f1.zip › supplementary files/Matlab_code_for_Figure1/BER_by_DDE/Critical_BER_by_DDE_rate_090_099_dv3_5.txt]

ÖÆ±í³É¹¦

out_code_rate =

   0.900000000000000

µ±Ç°Êä³öÂë×ÖµÄÂëÂÊ=0.90000,dv=3,dc=30
µ±Ç°ÊäÈëÎóÂëÂÊ=1.00000e-03£¬¶ÔÓ¦µÄÊä³öÎóÂëÂÊ=2.64998e-08
µ±Ç°ÊäÈëÎóÂëÂÊ=2.00000e-03£¬¶ÔÓ¦µÄÊä³öÎóÂëÂÊ=2.25838e-10
µ±Ç°ÊäÈëÎóÂëÂÊ=3.00000e-03£¬¶ÔÓ¦µÄÊä³öÎóÂëÂÊ=2.07839e-08
µ±Ç°ÊäÈëÎóÂëÂÊ=4.00000e-03£¬¶ÔÓ¦µÄÊä³öÎóÂëÂÊ=4.11206e-07
µ±Ç°ÊäÈëÎóÂëÂÊ=5.00000e-03£¬¶ÔÓ¦µÄÊä³öÎóÂëÂÊ=3.26414e-09
µ±Ç°ÊäÈëÎóÂëÂÊ=6.00000e-03£¬¶ÔÓ¦µÄÊä³öÎóÂëÂÊ=8.60810e-08
µ±Ç°ÊäÈëÎóÂëÂÊ=7.00000e-03£¬¶ÔÓ¦µÄÊä³öÎóÂëÂÊ=4.53932e-10
µ±Ç°ÊäÈëÎóÂëÂÊ=8.00000e-03£¬¶ÔÓ¦µÄÊä³öÎóÂëÂÊ=2.29968e-08
µ±Ç°ÊäÈëÎóÂëÂÊ=9.00000e-03£¬¶ÔÓ¦µÄÊä³öÎóÂëÂÊ=5.00296e-07
µ±Ç°ÊäÈëÎóÂëÂÊ=1.00000e-02£¬¶ÔÓ¦µÄÊä³öÎóÂëÂÊ=1.50935e-08
µ±Ç°ÊäÈëÎóÂëÂÊ=1.10000e-02£¬¶ÔÓ¦µÄÊä³öÎóÂëÂÊ=5.92175e-07
µ±Ç°ÊäÈëÎóÂëÂÊ=1.20000e-02£¬¶ÔÓ¦µÄÊä³öÎóÂëÂÊ=5.08596e-08
µ±Ç°ÊäÈëÎóÂëÂÊ=1.30000e-02£¬¶ÔÓ¦µÄÊä³öÎóÂëÂÊ=5.11498e-09
µ±Ç°ÊäÈëÎóÂëÂÊ=1.40000e-02£¬¶ÔÓ¦µÄÊä³öÎóÂëÂÊ=1.15579e-09
µ±Ç°ÊäÈëÎóÂëÂÊ=1.50000e-02£¬¶ÔÓ¦µÄÊä³öÎóÂëÂÊ=1.35760e-09
µ±Ç°ÊäÈëÎóÂëÂÊ=1.60000e-02£¬¶ÔÓ¦µÄÊä³öÎóÂëÂÊ=1.58084e-08
µ±Ç°ÊäÈëÎóÂëÂÊ=1.70000e-02£¬¶ÔÓ¦µÄÊä³öÎóÂëÂÊ=1.57968e-09
µ±Ç°ÊäÈëÎóÂëÂÊ=1.80000e-02£¬¶ÔÓ¦µÄÊä³öÎóÂëÂÊ=9.56730e-08
µ±Ç°ÊäÈëÎóÂëÂÊ=1.90000e-02£¬¶ÔÓ¦µÄÊä³öÎóÂëÂÊ=6.15250e-07
µ±Ç°ÊäÈëÎóÂëÂÊ=2.00000e-02£¬¶ÔÓ¦µÄÊä³öÎóÂëÂÊ=7.76659e-08
µ±Ç°ÊäÈëÎóÂëÂÊ=2.10000e-02£¬¶ÔÓ¦µÄÊä³öÎóÂëÂÊ=1.05805e-02
ÕÒµ½µ±Ç°ÊäÈëÎóÂëÂÊÃÅÏÞ=2.00000e-02£¬¶ÔÓ¦µÄÊä³öÎóÂëÂÊ=7.76659e-08
µ±Ç°ÊäÈëÎóÂëÂÊ=2.00000e-02£¬¶ÔÓ¦µÄÊä³öÎóÂëÂÊ=7.76659e-08
µ±Ç°ÊäÈëÎóÂëÂÊ=2.01000e-02£¬¶ÔÓ¦µÄÊä³öÎóÂëÂÊ=2.32025e-07
µ±Ç°ÊäÈëÎóÂëÂÊ=2.02000e-02£¬¶ÔÓ¦µÄÊä³öÎóÂëÂÊ=3.16272e-08
µ±Ç°ÊäÈëÎóÂëÂÊ=2.03000e-02£¬¶ÔÓ¦µÄÊä³öÎóÂëÂÊ=4.96578e-07
µ±Ç°ÊäÈëÎóÂëÂÊ=2.04000e-02£¬¶ÔÓ¦µÄÊä³öÎóÂëÂÊ=5.79434e-08
µ±Ç°ÊäÈëÎóÂëÂÊ=2.05000e-02£¬¶ÔÓ¦µÄÊä³öÎóÂëÂÊ=8.91037e-09
µ±Ç°ÊäÈëÎóÂëÂÊ=2.06000e-02£¬¶ÔÓ¦µÄÊä³öÎóÂëÂÊ=2.90285e-08
µ±Ç°ÊäÈëÎóÂëÂÊ=2.07000e-02£¬¶ÔÓ¦µÄÊä³öÎóÂëÂÊ=2.91462e-07
µ±Ç°ÊäÈëÎóÂëÂÊ=2.08000e-02£¬¶ÔÓ¦µÄÊä³öÎóÂëÂÊ=8.71887e-03
ÕÒµ½µ±Ç°ÊäÈëÎóÂëÂÊÃÅÏÞ=2.07000e-02£¬¶ÔÓ¦µÄÊä³öÎóÂëÂÊ=2.91462e-07

threshold_BER =

  Columns 1 through 5

   0.020700000000000                   0                   0                   0                   0
                   0                   0                   0                   0                   0
                   0                   0                   0                   0                   0

  Columns 6 through 10

                   0                   0                   0                   0                   0
                   0                   0                   0                   0                   0
                   0                   0                   0                   0                   0

µ±Ç°Êä³öÂë×ÖµÄÂëÂÊ=0.90000,dv=4,dc=40
µ±Ç°ÊäÈëÎóÂëÂÊ=1.00000e-03£¬¶ÔÓ¦µÄÊä³öÎóÂëÂÊ=1.60206e-11
µ±Ç°ÊäÈëÎóÂëÂÊ=2.00000e-03£¬¶ÔÓ¦µÄÊä³öÎóÂëÂÊ=1.52795e-08
µ±Ç°ÊäÈëÎóÂëÂÊ=3.00000e-03£¬¶ÔÓ¦µÄÊä³öÎóÂëÂÊ=5.83020e-07
µ±Ç°ÊäÈëÎóÂëÂÊ=4.00000e-03£¬¶ÔÓ¦µÄÊä³öÎóÂëÂÊ=3.15597e-11
µ±Ç°ÊäÈëÎóÂëÂÊ=5.00000e-03£¬¶ÔÓ¦µÄÊä³öÎóÂëÂÊ=4.25162e-09
µ±Ç°ÊäÈëÎóÂëÂÊ=6.00000e-03£¬¶ÔÓ¦µÄÊä³öÎóÂëÂÊ=1.52151e-07
µ±Ç°ÊäÈëÎóÂëÂÊ=7.00000e-03£¬¶ÔÓ¦µÄÊä³öÎóÂëÂÊ=2.89846e-12
µ±Ç°ÊäÈëÎóÂëÂÊ=8.00000e-03£¬¶ÔÓ¦µÄÊä³öÎóÂëÂÊ=1.06127e-09
µ±Ç°ÊäÈëÎóÂëÂÊ=9.00000e-03£¬¶ÔÓ¦µÄÊä³öÎóÂëÂÊ=8.98047e-08
µ±Ç°ÊäÈëÎóÂëÂÊ=1.00000e-02£¬¶ÔÓ¦µÄÊä³öÎóÂëÂÊ=5.53163e-12
µ±Ç°ÊäÈëÎóÂëÂÊ=1.10000e-02£¬¶ÔÓ¦µÄÊä³öÎóÂëÂÊ=6.26950e-09
µ±Ç°ÊäÈëÎóÂëÂÊ=1.20000e-02£¬¶ÔÓ¦µÄÊä³öÎóÂëÂÊ=9.18919e-07
µ±Ç°ÊäÈëÎóÂëÂÊ=1.30000e-02£¬¶ÔÓ¦µÄÊä³öÎóÂëÂÊ=6.93216e-09
µ±Ç°ÊäÈëÎóÂëÂÊ=1.40000e-02£¬¶ÔÓ¦µÄÊä³öÎóÂëÂÊ=2.13456e-11
µ±Ç°ÊäÈëÎóÂëÂÊ=1.50000e-02£¬¶ÔÓ¦µÄÊä³öÎóÂëÂÊ=7.18844e-07
µ±Ç°ÊäÈëÎóÂëÂÊ=1.60000e-02£¬¶ÔÓ¦µÄÊä³öÎóÂëÂÊ=8.21343e-07
µ±Ç°ÊäÈëÎóÂëÂÊ=1.70000e-02£¬¶ÔÓ¦µÄÊä³öÎóÂëÂÊ=7.47469e-10
µ±Ç°ÊäÈëÎóÂëÂÊ=1.80000e-02£¬¶ÔÓ¦µÄÊä³öÎóÂëÂÊ=3.62125e-09
µ±Ç°ÊäÈëÎóÂëÂÊ=1.90000e-02£¬¶ÔÓ¦µÄÊä³öÎóÂëÂÊ=2.85125e-10
µ±Ç°ÊäÈëÎóÂëÂÊ=2.00000e-02£¬¶ÔÓ¦µÄÊä³öÎóÂëÂÊ=2.50227e-07
µ±Ç°ÊäÈëÎóÂëÂÊ=2.10000e-02£¬¶ÔÓ¦µÄÊä³öÎóÂëÂÊ=1.40458e-02
ÕÒµ½µ±Ç°ÊäÈëÎóÂëÂÊÃÅÏÞ=2.00000e-02£¬¶ÔÓ¦µÄÊä³öÎóÂëÂÊ=2.50227e-07
µ±Ç°ÊäÈëÎóÂëÂÊ=2.00000e-02£¬¶ÔÓ¦µÄÊä³öÎóÂëÂÊ=2.50227e-07
µ±Ç°ÊäÈëÎóÂëÂÊ=2.01000e-02£¬¶ÔÓ¦µÄÊä³öÎóÂëÂÊ=1.86740e-07
µ±Ç°ÊäÈëÎóÂëÂÊ=2.02000e-02£¬¶ÔÓ¦µÄÊä³öÎóÂëÂÊ=6.54011e-07
µ±Ç°ÊäÈëÎóÂëÂÊ=2.03000e-02£¬¶ÔÓ¦µÄÊä³öÎóÂëÂÊ=3.25449e-10
µ±Ç°ÊäÈëÎóÂëÂÊ=2.04000e-02£¬¶ÔÓ¦µÄÊä³öÎóÂëÂÊ=2.59100e-12
µ±Ç°ÊäÈëÎóÂëÂÊ=2.05000e-02£¬¶ÔÓ¦µÄÊä³öÎóÂëÂÊ=1.61681e-07
µ±Ç°ÊäÈëÎóÂëÂÊ=2.06000e-02£¬¶ÔÓ¦µÄÊä³öÎóÂëÂÊ=1.21589e-02
ÕÒµ½µ±Ç°ÊäÈëÎóÂëÂÊÃÅÏÞ=2.05000e-02£¬¶ÔÓ¦µÄÊä³öÎóÂëÂÊ=1.61681e-07

threshold_BER =

  Columns 1 through 5

   0.020700000000000                   0                   0                   0                   0
   0.020500000000000                   0                   0                   0                   0
                   0                   0                   0                   0                   0

  Columns 6 through 10

                   0                   0                   0                   0                   0
                   0                   0                   0                   0                   0
                   0                   0                   0                   0                   0

µ±Ç°Êä³öÂë×ÖµÄÂëÂÊ=0.90000,dv=5,dc=50
µ±Ç°ÊäÈëÎóÂëÂÊ=1.00000e-03£¬¶ÔÓ¦µÄÊä³öÎóÂëÂÊ=4.51825e-15
µ±Ç°ÊäÈëÎóÂëÂÊ=2.00000e-03£¬¶ÔÓ¦µÄÊä³öÎóÂëÂÊ=1.46378e-10
µ±Ç°ÊäÈëÎóÂëÂÊ=3.00000e-03£¬¶ÔÓ¦µÄÊä³öÎóÂëÂÊ=3.33306e-08
µ±Ç°ÊäÈëÎóÂëÂÊ=4.00000e-03£¬¶ÔÓ¦µÄÊä³öÎóÂëÂÊ=7.55442e-16
µ±Ç°ÊäÈëÎóÂëÂÊ=5.00000e-03£¬¶ÔÓ¦µÄÊä³öÎóÂëÂÊ=1.70687e-12
µ±Ç°ÊäÈëÎóÂëÂÊ=6.00000e-03£¬¶ÔÓ¦µÄÊä³öÎóÂëÂÊ=1.03498e-09
µ±Ç°ÊäÈëÎóÂëÂÊ=7.00000e-03£¬¶ÔÓ¦µÄÊä³öÎóÂëÂÊ=1.03103e-07
µ±Ç°ÊäÈëÎóÂëÂÊ=8.00000e-03£¬¶ÔÓ¦µÄÊä³öÎóÂëÂÊ=1.98236e-14
µ±Ç°ÊäÈëÎóÂëÂÊ=9.00000e-03£¬¶ÔÓ¦µÄÊä³öÎóÂëÂÊ=1.80231e-10
µ±Ç°ÊäÈëÎóÂëÂÊ=1.00000e-02£¬¶ÔÓ¦µÄÊä³öÎóÂëÂÊ=1.02311e-07
µ±Ç°ÊäÈëÎóÂëÂÊ=1.10000e-02£¬¶ÔÓ¦µÄÊä³öÎóÂëÂÊ=9.40730e-13
µ±Ç°ÊäÈëÎóÂëÂÊ=1.20000e-02£¬¶ÔÓ¦µÄÊä³öÎóÂëÂÊ=3.01816e-08
µ±Ç°ÊäÈëÎóÂëÂÊ=1.30000e-02£¬¶ÔÓ¦µÄÊä³öÎóÂëÂÊ=1.03331e-11
µ±Ç°ÊäÈëÎóÂëÂÊ=1.40000e-02£¬¶ÔÓ¦µÄÊä³öÎóÂëÂÊ=4.52046e-15
µ±Ç°ÊäÈëÎóÂëÂÊ=1.50000e-02£¬¶ÔÓ¦µÄÊä³öÎóÂëÂÊ=2.74457e-15
µ±Ç°ÊäÈëÎóÂëÂÊ=1.60000e-02£¬¶ÔÓ¦µÄÊä³öÎóÂëÂÊ=2.54332e-10
µ±Ç°ÊäÈëÎóÂëÂÊ=1.70000e-02£¬¶ÔÓ¦µÄÊä³öÎóÂëÂÊ=4.30551e-08
µ±Ç°ÊäÈëÎóÂëÂÊ=1.80000e-02£¬¶ÔÓ¦µÄÊä³öÎóÂëÂÊ=2.36350e-08
µ±Ç°ÊäÈëÎóÂëÂÊ=1.90000e-02£¬¶ÔÓ¦µÄÊä³öÎóÂëÂÊ=1.26262e-08
µ±Ç°ÊäÈëÎóÂëÂÊ=2.00000e-02£¬¶ÔÓ¦µÄÊä³öÎóÂëÂÊ=1.54935e-02
ÕÒµ½µ±Ç°ÊäÈëÎóÂëÂÊÃÅÏÞ=1.90000e-02£¬¶ÔÓ¦µÄÊä³öÎóÂëÂÊ=1.26262e-08
µ±Ç°ÊäÈëÎóÂëÂÊ=1.90000e-02£¬¶ÔÓ¦µÄÊä³öÎóÂëÂÊ=1.26262e-08
µ±Ç°ÊäÈëÎóÂëÂÊ=1.91000e-02£¬¶ÔÓ¦µÄÊä³öÎóÂëÂÊ=1.24331e-02
ÕÒµ½µ±Ç°ÊäÈëÎóÂëÂÊÃÅÏÞ=1.90000e-02£¬¶ÔÓ¦µÄÊä³öÎóÂëÂÊ=1.26262e-08

threshold_BER =

  Columns 1 through 5

   0.020700000000000                   0                   0                   0                   0
   0.020500000000000                   0                   0                   0                   0
   0.019000000000000                   0                   0                   0                   0

  Columns 6 through 10

                   0                   0                   0                   0                   0
                   0                   0                   0                   0                   0
                   0                   0                   0                   0                   0


out_code_rate =

   0.910000000000000

µ±Ç°Êä³öÂë×ÖµÄÂëÂÊ=0.91000,dv=3,dc=33
µ±Ç°ÊäÈëÎóÂëÂÊ=1.00000e-03£¬¶ÔÓ¦µÄÊä³öÎóÂëÂÊ=4.37463e-08
µ±Ç°ÊäÈëÎóÂëÂÊ=2.00000e-03£¬¶ÔÓ¦µÄÊä³öÎóÂëÂÊ=6.63249e-10
µ±Ç°ÊäÈëÎóÂëÂÊ=3.00000e-03£¬¶ÔÓ¦µÄÊä³öÎóÂëÂÊ=5.60664e-08
µ±Ç°ÊäÈëÎóÂëÂÊ=4.00000e-03£¬¶ÔÓ¦µÄÊä³öÎóÂëÂÊ=2.97577e-10
µ±Ç°ÊäÈëÎóÂëÂÊ=5.00000e-03£¬¶ÔÓ¦µÄÊä³öÎóÂëÂÊ=1.94302e-08
µ±Ç°ÊäÈëÎóÂëÂÊ=6.00000e-03£¬¶ÔÓ¦µÄÊä³öÎóÂëÂÊ=4.30713e-07
µ±Ç°ÊäÈëÎóÂëÂÊ=7.00000e-03£¬¶ÔÓ¦µÄÊä³öÎóÂëÂÊ=8.80261e-09
µ±Ç°ÊäÈëÎóÂëÂÊ=8.00000e-03£¬¶ÔÓ¦µÄÊä³öÎóÂëÂÊ=3.12710e-07
µ±Ç°ÊäÈëÎóÂëÂÊ=9.00000e-03£¬¶ÔÓ¦µÄÊä³öÎóÂëÂÊ=1.23020e-08
µ±Ç°ÊäÈëÎóÂëÂÊ=1.00000e-02£¬¶ÔÓ¦µÄÊä³öÎóÂëÂÊ=6.93318e-07
µ±Ç°ÊäÈëÎóÂëÂÊ=1.10000e-02£¬¶ÔÓ¦µÄÊä³öÎóÂëÂÊ=1.08982e-07
µ±Ç°ÊäÈëÎóÂëÂÊ=1.20000e-02£¬¶ÔÓ¦µÄÊä³öÎóÂëÂÊ=2.95938e-08
µ±Ç°ÊäÈëÎóÂëÂÊ=1.30000e-02£¬¶ÔÓ¦µÄÊä³öÎóÂëÂÊ=2.66180e-08
µ±Ç°ÊäÈëÎóÂëÂÊ=1.40000e-02£¬¶ÔÓ¦µÄÊä³öÎóÂëÂÊ=1.40117e-07
µ±Ç°ÊäÈëÎóÂëÂÊ=1.50000e-02£¬¶ÔÓ¦µÄÊä³öÎóÂëÂÊ=1.38226e-08
µ±Ç°ÊäÈëÎóÂëÂÊ=1.60000e-02£¬¶ÔÓ¦µÄÊä³öÎóÂëÂÊ=2.58555e-07
µ±Ç°ÊäÈëÎóÂëÂÊ=1.70000e-02£¬¶ÔÓ¦µÄÊä³öÎóÂëÂÊ=6.42228e-07
µ±Ç°ÊäÈëÎóÂëÂÊ=1.80000e-02£¬¶ÔÓ¦µÄÊä³öÎóÂëÂÊ=9.31478e-09
µ±Ç°ÊäÈëÎóÂëÂÊ=1.90000e-02£¬¶ÔÓ¦µÄÊä³öÎóÂëÂÊ=9.66169e-03
ÕÒµ½µ±Ç°ÊäÈëÎóÂëÂÊÃÅÏÞ=1.80000e-02£¬¶ÔÓ¦µÄÊä³öÎóÂëÂÊ=9.31478e-09
µ±Ç°ÊäÈëÎóÂëÂÊ=1.80000e-02£¬¶ÔÓ¦µÄÊä³öÎóÂëÂÊ=9.31478e-09
µ±Ç°ÊäÈëÎóÂëÂÊ=1.81000e-02£¬¶ÔÓ¦µÄÊä³öÎóÂëÂÊ=2.50892e-08
µ±Ç°ÊäÈëÎóÂëÂÊ=1.82000e-02£¬¶ÔÓ¦µÄÊä³öÎóÂëÂÊ=1.39876e-09
µ±Ç°ÊäÈëÎóÂëÂÊ=1.83000e-02£¬¶ÔÓ¦µÄÊä³öÎóÂëÂÊ=3.55705e-08
µ±Ç°ÊäÈëÎóÂëÂÊ=1.84000e-02£¬¶ÔÓ¦µÄÊä³öÎóÂëÂÊ=1.78650e-09
µ±Ç°ÊäÈëÎóÂëÂÊ=1.85000e-02£¬¶ÔÓ¦µÄÊä³öÎóÂëÂÊ=4.68229e-07
µ±Ç°ÊäÈëÎóÂëÂÊ=1.86000e-02£¬¶ÔÓ¦µÄÊä³öÎóÂëÂÊ=2.48958e-08
µ±Ç°ÊäÈëÎóÂëÂÊ=1.87000e-02£¬¶ÔÓ¦µÄÊä³öÎóÂëÂÊ=5.31853e-09
µ±Ç°ÊäÈëÎóÂëÂÊ=1.88000e-02£¬¶ÔÓ¦µÄÊä³öÎóÂëÂÊ=8.22446e-03
ÕÒµ½µ±Ç°ÊäÈëÎóÂëÂÊÃÅÏÞ=1.87000e-02£¬¶ÔÓ¦µÄÊä³öÎóÂëÂÊ=5.31853e-09

threshold_BER =

  Columns 1 through 5

   0.020700000000000   0.018700000000000                   0                   0                   0
   0.020500000000000                   0                   0                   0                   0
   0.019000000000000                   0                   0                   0                   0

  Columns 6 through 10

                   0                   0                   0                   0                   0
                   0                   0                   0                   0                   0
                   0                   0                   0                   0                   0

µ±Ç°Êä³öÂë×ÖµÄÂëÂÊ=0.91000,dv=4,dc=44
µ±Ç°ÊäÈëÎóÂëÂÊ=1.00000e-03£¬¶ÔÓ¦µÄÊä³öÎóÂëÂÊ=4.11195e-11
µ±Ç°ÊäÈëÎóÂëÂÊ=2.00000e-03£¬¶ÔÓ¦µÄÊä³öÎóÂëÂÊ=3.53649e-08
µ±Ç°ÊäÈëÎóÂëÂÊ=3.00000e-03£¬¶ÔÓ¦µÄÊä³öÎóÂëÂÊ=3.30383e-13
µ±Ç°ÊäÈëÎóÂëÂÊ=4.00000e-03£¬¶ÔÓ¦µÄÊä³öÎóÂëÂÊ=2.81422e-10
µ±Ç°ÊäÈëÎóÂëÂÊ=5.00000e-03£¬¶ÔÓ¦µÄÊä³öÎóÂëÂÊ=2.93862e-08
µ±Ç°ÊäÈëÎóÂëÂÊ=6.00000e-03£¬¶ÔÓ¦µÄÊä³öÎóÂëÂÊ=8.23867e-07
µ±Ç°ÊäÈëÎóÂëÂÊ=7.00000e-03£¬¶ÔÓ¦µÄÊä³öÎóÂëÂÊ=2.46008e-10
µ±Ç°ÊäÈëÎóÂëÂÊ=8.00000e-03£¬¶ÔÓ¦µÄÊä³öÎóÂëÂÊ=4.47721e-08
µ±Ç°ÊäÈëÎóÂëÂÊ=9.00000e-03£¬¶ÔÓ¦µÄÊä³öÎóÂëÂÊ=3.40394e-12
µ±Ç°ÊäÈëÎóÂëÂÊ=1.00000e-02£¬¶ÔÓ¦µÄÊä³öÎóÂëÂÊ=7.95953e-09
µ±Ç°ÊäÈëÎóÂëÂÊ=1.10000e-02£¬¶ÔÓ¦µÄÊä³öÎóÂëÂÊ=2.28303e-12
µ±Ç°ÊäÈëÎóÂëÂÊ=1.20000e-02£¬¶ÔÓ¦µÄÊä³öÎóÂëÂÊ=4.48096e-08
µ±Ç°ÊäÈëÎóÂëÂÊ=1.30000e-02£¬¶ÔÓ¦µÄÊä³öÎóÂëÂÊ=1.95002e-09
µ±Ç°ÊäÈëÎóÂëÂÊ=1.40000e-02£¬¶ÔÓ¦µÄÊä³öÎóÂëÂÊ=1.18461e-09
µ±Ç°ÊäÈëÎóÂëÂÊ=1.50000e-02£¬¶ÔÓ¦µÄÊä³öÎóÂëÂÊ=6.52847e-08
µ±Ç°ÊäÈëÎóÂëÂÊ=1.60000e-02£¬¶ÔÓ¦µÄÊä³öÎóÂëÂÊ=4.59324e-08
µ±Ç°ÊäÈëÎóÂëÂÊ=1.70000e-02£¬¶ÔÓ¦µÄÊä³öÎóÂëÂÊ=4.75924e-11
µ±Ç°ÊäÈëÎóÂëÂÊ=1.80000e-02£¬¶ÔÓ¦µÄÊä³öÎóÂëÂÊ=1.62217e-10
µ±Ç°ÊäÈëÎóÂëÂÊ=1.90000e-02£¬¶ÔÓ¦µÄÊä³öÎóÂëÂÊ=1.26473e-02
ÕÒµ½µ±Ç°ÊäÈëÎóÂëÂÊÃÅÏÞ=1.80000e-02£¬¶ÔÓ¦µÄÊä³öÎóÂëÂÊ=1.62217e-10
µ±Ç°ÊäÈëÎóÂëÂÊ=1.80000e-02£¬¶ÔÓ¦µÄÊä³öÎóÂëÂÊ=1.62217e-10
µ±Ç°ÊäÈëÎóÂëÂÊ=1.81000e-02£¬¶ÔÓ¦µÄÊä³öÎóÂëÂÊ=6.18574e-08
µ±Ç°ÊäÈëÎóÂëÂÊ=1.82000e-02£¬¶ÔÓ¦µÄÊä³öÎóÂëÂÊ=8.05059e-07
µ±Ç°ÊäÈëÎóÂëÂÊ=1.83000e-02£¬¶ÔÓ¦µÄÊä³öÎóÂëÂÊ=7.85197e-08
µ±Ç°ÊäÈëÎóÂëÂÊ=1.84000e-02£¬¶ÔÓ¦µÄÊä³öÎóÂëÂÊ=9.42691e-09
µ±Ç°ÊäÈëÎóÂëÂÊ=1.85000e-02£¬¶ÔÓ¦µÄÊä³öÎóÂëÂÊ=1.57288e-09
µ±Ç°ÊäÈëÎóÂëÂÊ=1.86000e-02£¬¶ÔÓ¦µÄÊä³öÎóÂëÂÊ=4.66400e-03
ÕÒµ½µ±Ç°ÊäÈëÎóÂëÂÊÃÅÏÞ=1.85000e-02£¬¶ÔÓ¦µÄÊä³öÎóÂëÂÊ=1.57288e-09

threshold_BER =

  Columns 1 through 5

   0.020700000000000   0.018700000000000                   0                   0                   0
   0.020500000000000   0.018500000000000                   0                   0                   0
   0.019000000000000                   0                   0                   0                   0

  Columns 6 through 10

                   0                   0                   0                   0                   0
                   0                   0                   0                   0                   0
                   0                   0                   0                   0                   0

µ±Ç°Êä³öÂë×ÖµÄÂëÂÊ=0.91000,dv=5,dc=56
µ±Ç°ÊäÈëÎóÂëÂÊ=1.00000e-03£¬¶ÔÓ¦µÄÊä³öÎóÂëÂÊ=2.41788e-14
µ±Ç°ÊäÈëÎóÂëÂÊ=2.00000e-03£¬¶ÔÓ¦µÄÊä³öÎóÂëÂÊ=6.83940e-10
µ±Ç°ÊäÈëÎóÂëÂÊ=3.00000e-03£¬¶ÔÓ¦µÄÊä³öÎóÂëÂÊ=1.27531e-07
µ±Ç°ÊäÈëÎóÂëÂÊ=4.00000e-03£¬¶ÔÓ¦µÄÊä³öÎóÂëÂÊ=2.55039e-14
µ±Ç°ÊäÈëÎóÂëÂÊ=5.00000e-03£¬¶ÔÓ¦µÄÊä³öÎóÂëÂÊ=1.10266e-10
µ±Ç°ÊäÈëÎóÂëÂÊ=6.00000e-03£¬¶ÔÓ¦µÄÊä³öÎóÂëÂÊ=3.39682e-08
µ±Ç°ÊäÈëÎóÂëÂÊ=7.00000e-03£¬¶ÔÓ¦µÄÊä³öÎóÂëÂÊ=5.23740e-15
µ±Ç°ÊäÈëÎóÂëÂÊ=8.00000e-03£¬¶ÔÓ¦µÄÊä³öÎóÂëÂÊ=1.66469e-10
µ±Ç°ÊäÈëÎóÂëÂÊ=9.00000e-03£¬¶ÔÓ¦µÄÊä³öÎóÂëÂÊ=1.74830e-07
µ±Ç°ÊäÈëÎóÂëÂÊ=1.00000e-02£¬¶ÔÓ¦µÄÊä³öÎóÂëÂÊ=1.90780e-11
µ±Ç°ÊäÈëÎóÂëÂÊ=1.10000e-02£¬¶ÔÓ¦µÄÊä³öÎóÂëÂÊ=4.03768e-07
µ±Ç°ÊäÈëÎóÂëÂÊ=1.20000e-02£¬¶ÔÓ¦µÄÊä³öÎóÂëÂÊ=1.12812e-08
µ±Ç°ÊäÈëÎóÂëÂÊ=1.30000e-02£¬¶ÔÓ¦µÄÊä³öÎóÂëÂÊ=7.20973e-09
µ±Ç°ÊäÈëÎóÂëÂÊ=1.40000e-02£¬¶ÔÓ¦µÄÊä³öÎóÂëÂÊ=2.21730e-15
µ±Ç°ÊäÈëÎóÂëÂÊ=1.50000e-02£¬¶ÔÓ¦µÄÊä³öÎóÂëÂÊ=2.73874e-11
µ±Ç°ÊäÈëÎóÂëÂÊ=1.60000e-02£¬¶ÔÓ¦µÄÊä³öÎóÂëÂÊ=5.39913e-09
µ±Ç°ÊäÈëÎóÂëÂÊ=1.70000e-02£¬¶ÔÓ¦µÄÊä³öÎóÂëÂÊ=1.11121e-02
ÕÒµ½µ±Ç°ÊäÈëÎóÂëÂÊÃÅÏÞ=1.60000e-02£¬¶ÔÓ¦µÄÊä³öÎóÂëÂÊ=5.39913e-09
µ±Ç°ÊäÈëÎóÂëÂÊ=1.60000e-02£¬¶ÔÓ¦µÄÊä³öÎóÂëÂÊ=5.39913e-09
µ±Ç°ÊäÈëÎóÂëÂÊ=1.61000e-02£¬¶ÔÓ¦µÄÊä³öÎóÂëÂÊ=4.34563e-09
µ±Ç°ÊäÈëÎóÂëÂÊ=1.62000e-02£¬¶ÔÓ¦µÄÊä³öÎóÂëÂÊ=6.31790e-08
µ±Ç°ÊäÈëÎóÂëÂÊ=1.63000e-02£¬¶ÔÓ¦µÄÊä³öÎóÂëÂÊ=6.96837e-13
µ±Ç°ÊäÈëÎóÂëÂÊ=1.64000e-02£¬¶ÔÓ¦µÄÊä³öÎóÂëÂÊ=1.65654e-15
µ±Ç°ÊäÈëÎóÂëÂÊ=1.65000e-02£¬¶ÔÓ¦µÄÊä³öÎóÂëÂÊ=6.49820e-11
µ±Ç°ÊäÈëÎóÂëÂÊ=1.66000e-02£¬¶ÔÓ¦µÄÊä³öÎóÂëÂÊ=2.20883e-08
µ±Ç°ÊäÈëÎóÂëÂÊ=1.67000e-02£¬¶ÔÓ¦µÄÊä³öÎóÂëÂÊ=1.15713e-07
µ±Ç°ÊäÈëÎóÂëÂÊ=1.68000e-02£¬¶ÔÓ¦µÄÊä³öÎóÂëÂÊ=4.76594e-11
µ±Ç°ÊäÈëÎóÂëÂÊ=1.69000e-02£¬¶ÔÓ¦µÄÊä³öÎóÂëÂÊ=9.25975e-09
µ±Ç°ÊäÈëÎóÂëÂÊ=1.70000e-02£¬¶ÔÓ¦µÄÊä³öÎóÂëÂÊ=1.11121e-02
ÕÒµ½µ±Ç°ÊäÈëÎóÂëÂÊÃÅÏÞ=1.69000e-02£¬¶ÔÓ¦µÄÊä³öÎóÂëÂÊ=9.25975e-09

threshold_BER =

  Columns 1 through 5

   0.020700000000000   0.018700000000000                   0                   0                   0
   0.020500000000000   0.018500000000000                   0                   0                   0
   0.019000000000000   0.016900000000000                   0                   0                   0

  Columns 6 through 10

                   0                   0                   0                   0                   0
                   0                   0                   0                   0                   0
                   0                   0                   0                   0                   0


out_code_rate =

   0.920000000000000

µ±Ç°Êä³öÂë×ÖµÄÂëÂÊ=0.92000,dv=3,dc=38
µ±Ç°ÊäÈëÎóÂëÂÊ=1.00000e-03£¬¶ÔÓ¦µÄÊä³öÎóÂëÂÊ=9.06527e-08
µ±Ç°ÊäÈëÎóÂëÂÊ=2.00000e-03£¬¶ÔÓ¦µÄÊä³öÎóÂëÂÊ=3.13406e-09
µ±Ç°ÊäÈëÎóÂëÂÊ=3.00000e-03£¬¶ÔÓ¦µÄÊä³öÎóÂëÂÊ=2.29609e-07
µ±Ç°ÊäÈëÎóÂëÂÊ=4.00000e-03£¬¶ÔÓ¦µÄÊä³öÎóÂëÂÊ=4.59346e-09
µ±Ç°ÊäÈëÎóÂëÂÊ=5.00000e-03£¬¶ÔÓ¦µÄÊä³öÎóÂëÂÊ=2.25319e-07
µ±Ç°ÊäÈëÎóÂëÂÊ=6.00000e-03£¬¶ÔÓ¦µÄÊä³öÎóÂëÂÊ=7.08214e-09
µ±Ç°ÊäÈëÎóÂëÂÊ=7.00000e-03£¬¶ÔÓ¦µÄÊä³öÎóÂëÂÊ=4.19189e-07
µ±Ç°ÊäÈëÎóÂëÂÊ=8.00000e-03£¬¶ÔÓ¦µÄÊä³öÎóÂëÂÊ=4.18378e-08
µ±Ç°ÊäÈëÎóÂëÂÊ=9.00000e-03£¬¶ÔÓ¦µÄÊä³öÎóÂëÂÊ=5.55173e-09
µ±Ç°ÊäÈëÎóÂëÂÊ=1.00000e-02£¬¶ÔÓ¦µÄÊä³öÎóÂëÂÊ=1.92834e-09
µ±Ç°ÊäÈëÎóÂëÂÊ=1.10000e-02£¬¶ÔÓ¦µÄÊä³öÎóÂëÂÊ=3.98918e-09
µ±Ç°ÊäÈëÎóÂëÂÊ=1.20000e-02£¬¶ÔÓ¦µÄÊä³öÎóÂëÂÊ=8.06344e-08
µ±Ç°ÊäÈëÎóÂëÂÊ=1.30000e-02£¬¶ÔÓ¦µÄÊä³öÎóÂëÂÊ=6.25580e-08
µ±Ç°ÊäÈëÎóÂëÂÊ=1.40000e-02£¬¶ÔÓ¦µÄÊä³öÎóÂëÂÊ=1.22977e-07
µ±Ç°ÊäÈëÎóÂëÂÊ=1.50000e-02£¬¶ÔÓ¦µÄÊä³öÎóÂëÂÊ=7.56510e-07
µ±Ç°ÊäÈëÎóÂëÂÊ=1.60000e-02£¬¶ÔÓ¦µÄÊä³öÎóÂëÂÊ=3.75319e-07
µ±Ç°ÊäÈëÎóÂëÂÊ=1.70000e-02£¬¶ÔÓ¦µÄÊä³öÎóÂëÂÊ=1.02943e-02
ÕÒµ½µ±Ç°ÊäÈëÎóÂëÂÊÃÅÏÞ=1.60000e-02£¬¶ÔÓ¦µÄÊä³öÎóÂëÂÊ=3.75319e-07
µ±Ç°ÊäÈëÎóÂëÂÊ=1.60000e-02£¬¶ÔÓ¦µÄÊä³öÎóÂëÂÊ=3.75319e-07
µ±Ç°ÊäÈëÎóÂëÂÊ=1.61000e-02£¬¶ÔÓ¦µÄÊä³öÎóÂëÂÊ=4.23810e-07
µ±Ç°ÊäÈëÎóÂëÂÊ=1.62000e-02£¬¶ÔÓ¦µÄÊä³öÎóÂëÂÊ=7.29066e-03
ÕÒµ½µ±Ç°ÊäÈëÎóÂëÂÊÃÅÏÞ=1.61000e-02£¬¶ÔÓ¦µÄÊä³öÎóÂëÂÊ=4.23810e-07

threshold_BER =

  Columns 1 through 5

   0.020700000000000   0.018700000000000   0.016100000000000                   0                   0
   0.020500000000000   0.018500000000000                   0                   0                   0
   0.019000000000000   0.016900000000000                   0                   0                   0

  Columns 6 through 10

                   0                   0                   0                   0                   0
                   0                   0                   0                   0                   0
                   0                   0                   0                   0                   0

µ±Ç°Êä³öÂë×ÖµÄÂëÂÊ=0.92000,dv=4,dc=50
µ±Ç°ÊäÈëÎóÂëÂÊ=1.00000e-03£¬¶ÔÓ¦µÄÊä³öÎóÂëÂÊ=1.42174e-10
µ±Ç°ÊäÈëÎóÂëÂÊ=2.00000e-03£¬¶ÔÓ¦µÄÊä³öÎóÂëÂÊ=1.05178e-07
µ±Ç°ÊäÈëÎóÂëÂÊ=3.00000e-03£¬¶ÔÓ¦µÄÊä³öÎóÂëÂÊ=7.56807e-12
µ±Ç°ÊäÈëÎóÂëÂÊ=4.00000e-03£¬¶ÔÓ¦µÄÊä³öÎóÂëÂÊ=4.40165e-09
µ±Ç°ÊäÈëÎóÂëÂÊ=5.00000e-03£¬¶ÔÓ¦µÄÊä³öÎóÂëÂÊ=3.16067e-07
µ±Ç°ÊäÈëÎóÂëÂÊ=6.00000e-03£¬¶ÔÓ¦µÄÊä³öÎóÂëÂÊ=9.40351e-11
µ±Ç°ÊäÈëÎóÂëÂÊ=7.00000e-03£¬¶ÔÓ¦µÄÊä³öÎóÂëÂÊ=4.07645e-08
µ±Ç°ÊäÈëÎóÂëÂÊ=8.00000e-03£¬¶ÔÓ¦µÄÊä³öÎóÂëÂÊ=1.17295e-11
µ±Ç°ÊäÈëÎóÂëÂÊ=9.00000e-03£¬¶ÔÓ¦µÄÊä³öÎóÂëÂÊ=4.15029e-08
µ±Ç°ÊäÈëÎóÂëÂÊ=1.00000e-02£¬¶ÔÓ¦µÄÊä³öÎóÂëÂÊ=2.69117e-10
µ±Ç°ÊäÈëÎóÂëÂÊ=1.10000e-02£¬¶ÔÓ¦µÄÊä³öÎóÂëÂÊ=4.46692e-12
µ±Ç°ÊäÈëÎóÂëÂÊ=1.20000e-02£¬¶ÔÓ¦µÄÊä³öÎóÂëÂÊ=5.31422e-12
µ±Ç°ÊäÈëÎóÂëÂÊ=1.30000e-02£¬¶ÔÓ¦µÄÊä³öÎóÂëÂÊ=4.40144e-09
µ±Ç°ÊäÈëÎóÂëÂÊ=1.40000e-02£¬¶ÔÓ¦µÄÊä³öÎóÂëÂÊ=4.10986e-08
µ±Ç°ÊäÈëÎóÂëÂÊ=1.50000e-02£¬¶ÔÓ¦µÄÊä³öÎóÂëÂÊ=6.02051e-07
µ±Ç°ÊäÈëÎóÂëÂÊ=1.60000e-02£¬¶ÔÓ¦µÄÊä³öÎóÂëÂÊ=1.07382e-08
µ±Ç°ÊäÈëÎóÂëÂÊ=1.70000e-02£¬¶ÔÓ¦µÄÊä³öÎóÂëÂÊ=1.20871e-02
ÕÒµ½µ±Ç°ÊäÈëÎóÂëÂÊÃÅÏÞ=1.60000e-02£¬¶ÔÓ¦µÄÊä³öÎóÂëÂÊ=1.07382e-08
µ±Ç°ÊäÈëÎóÂëÂÊ=1.60000e-02£¬¶ÔÓ¦µÄÊä³öÎóÂëÂÊ=1.07382e-08
µ±Ç°ÊäÈëÎóÂëÂÊ=1.61000e-02£¬¶ÔÓ¦µÄÊä³öÎóÂëÂÊ=1.83662e-07
µ±Ç°ÊäÈëÎóÂëÂÊ=1.62000e-02£¬¶ÔÓ¦µÄÊä³öÎóÂëÂÊ=1.06611e-09
µ±Ç°ÊäÈëÎóÂëÂÊ=1.63000e-02£¬¶ÔÓ¦µÄÊä³öÎóÂëÂÊ=9.27805e-03
ÕÒµ½µ±Ç°ÊäÈëÎóÂëÂÊÃÅÏÞ=1.62000e-02£¬¶ÔÓ¦µÄÊä³öÎóÂëÂÊ=1.06611e-09

threshold_BER =

  Columns 1 through 5

   0.020700000000000   0.018700000000000   0.016100000000000                   0                   0
   0.020500000000000   0.018500000000000   0.016200000000000                   0                   0
   0.019000000000000   0.016900000000000                   0                   0                   0

  Columns 6 through 10

                   0                   0                   0                   0                   0
                   0                   0                   0                   0                   0
                   0                   0                   0                   0                   0

µ±Ç°Êä³öÂë×ÖµÄÂëÂÊ=0.92000,dv=5,dc=63
µ±Ç°ÊäÈëÎóÂëÂÊ=1.00000e-03£¬¶ÔÓ¦µÄÊä³öÎóÂëÂÊ=1.46091e-13
µ±Ç°ÊäÈëÎóÂëÂÊ=2.00000e-03£¬¶ÔÓ¦µÄÊä³öÎóÂëÂÊ=3.19352e-09
µ±Ç°ÊäÈëÎóÂëÂÊ=3.00000e-03£¬¶ÔÓ¦µÄÊä³öÎóÂëÂÊ=4.75492e-07
µ±Ç°ÊäÈëÎóÂëÂÊ=4.00000e-03£¬¶ÔÓ¦µÄÊä³öÎóÂëÂÊ=2.72553e-12
µ±Ç°ÊäÈëÎóÂëÂÊ=5.00000e-03£¬¶ÔÓ¦µÄÊä³öÎóÂëÂÊ=5.23728e-09
µ±Ç°ÊäÈëÎóÂëÂÊ=6.00000e-03£¬¶ÔÓ¦µÄÊä³öÎóÂëÂÊ=7.60733e-07
µ±Ç°ÊäÈëÎóÂëÂÊ=7.00000e-03£¬¶ÔÓ¦µÄÊä³öÎóÂëÂÊ=6.98232e-11
µ±Ç°ÊäÈëÎóÂëÂÊ=8.00000e-03£¬¶ÔÓ¦µÄÊä³öÎóÂëÂÊ=1.95665e-07
µ±Ç°ÊäÈëÎóÂëÂÊ=9.00000e-03£¬¶ÔÓ¦µÄÊä³öÎóÂëÂÊ=1.44056e-10
µ±Ç°ÊäÈëÎóÂëÂÊ=1.00000e-02£¬¶ÔÓ¦µÄÊä³öÎóÂëÂÊ=4.14958e-14
µ±Ç°ÊäÈëÎóÂëÂÊ=1.10000e-02£¬¶ÔÓ¦µÄÊä³öÎóÂëÂÊ=2.37045e-15
µ±Ç°ÊäÈëÎóÂëÂÊ=1.20000e-02£¬¶ÔÓ¦µÄÊä³öÎóÂëÂÊ=1.70079e-11
µ±Ç°ÊäÈëÎóÂëÂÊ=1.30000e-02£¬¶ÔÓ¦µÄÊä³öÎóÂëÂÊ=2.61307e-10
µ±Ç°ÊäÈëÎóÂëÂÊ=1.40000e-02£¬¶ÔÓ¦µÄÊä³öÎóÂëÂÊ=2.60596e-14
µ±Ç°ÊäÈëÎóÂëÂÊ=1.50000e-02£¬¶ÔÓ¦µÄÊä³öÎóÂëÂÊ=1.66000e-09
µ±Ç°ÊäÈëÎóÂëÂÊ=1.60000e-02£¬¶ÔÓ¦µÄÊä³öÎóÂëÂÊ=1.26925e-02
ÕÒµ½µ±Ç°ÊäÈëÎóÂëÂÊÃÅÏÞ=1.50000e-02£¬¶ÔÓ¦µÄÊä³öÎóÂëÂÊ=1.66000e-09
µ±Ç°ÊäÈëÎóÂëÂÊ=1.50000e-02£¬¶ÔÓ¦µÄÊä³öÎóÂëÂÊ=1.66000e-09
µ±Ç°ÊäÈëÎóÂëÂÊ=1.51000e-02£¬¶ÔÓ¦µÄÊä³öÎóÂëÂÊ=1.01062e-02
ÕÒµ½µ±Ç°ÊäÈëÎóÂëÂÊÃÅÏÞ=1.50000e-02£¬¶ÔÓ¦µÄÊä³öÎóÂëÂÊ=1.66000e-09

threshold_BER =

  Columns 1 through 5

   0.020700000000000   0.018700000000000   0.016100000000000                   0                   0
   0.020500000000000   0.018500000000000   0.016200000000000                   0                   0
   0.019000000000000   0.016900000000000   0.015000000000000                   0                   0

  Columns 6 through 10

                   0                   0                   0                   0                   0
                   0                   0                   0                   0                   0
                   0                   0                   0                   0                   0


out_code_rate =

   0.930000000000000

µ±Ç°Êä³öÂë×ÖµÄÂëÂÊ=0.93000,dv=3,dc=43
µ±Ç°ÊäÈëÎóÂëÂÊ=1.00000e-03£¬¶ÔÓ¦µÄÊä³öÎóÂëÂÊ=1.69334e-07
µ±Ç°ÊäÈëÎóÂëÂÊ=2.00000e-03£¬¶ÔÓ¦µÄÊä³öÎóÂëÂÊ=1.16767e-08
µ±Ç°ÊäÈëÎóÂëÂÊ=3.00000e-03£¬¶ÔÓ¦µÄÊä³öÎóÂëÂÊ=7.41761e-07
µ±Ç°ÊäÈëÎóÂëÂÊ=4.00000e-03£¬¶ÔÓ¦µÄÊä³öÎóÂëÂÊ=4.28700e-08
µ±Ç°ÊäÈëÎóÂëÂÊ=5.00000e-03£¬¶ÔÓ¦µÄÊä³öÎóÂëÂÊ=1.45166e-09
µ±Ç°ÊäÈëÎóÂëÂÊ=6.00000e-03£¬¶ÔÓ¦µÄÊä³öÎóÂëÂÊ=2.13997e-07
µ±Ç°ÊäÈëÎóÂëÂÊ=7.00000e-03£¬¶ÔÓ¦µÄÊä³öÎóÂëÂÊ=3.47334e-08
µ±Ç°ÊäÈëÎóÂëÂÊ=8.00000e-03£¬¶ÔÓ¦µÄÊä³öÎóÂëÂÊ=1.14432e-08
µ±Ç°ÊäÈëÎóÂëÂÊ=9.00000e-03£¬¶ÔÓ¦µÄÊä³öÎóÂëÂÊ=1.55977e-08
µ±Ç°ÊäÈëÎóÂëÂÊ=1.00000e-02£¬¶ÔÓ¦µÄÊä³öÎóÂëÂÊ=1.51990e-07
µ±Ç°ÊäÈëÎóÂëÂÊ=1.10000e-02£¬¶ÔÓ¦µÄÊä³öÎóÂëÂÊ=6.14399e-08
µ±Ç°ÊäÈëÎóÂëÂÊ=1.20000e-02£¬¶ÔÓ¦µÄÊä³öÎóÂëÂÊ=3.56759e-08
µ±Ç°ÊäÈëÎóÂëÂÊ=1.30000e-02£¬¶ÔÓ¦µÄÊä³öÎóÂëÂÊ=1.63649e-08
µ±Ç°ÊäÈëÎóÂëÂÊ=1.40000e-02£¬¶ÔÓ¦µÄÊä³öÎóÂëÂÊ=2.03846e-07
µ±Ç°ÊäÈëÎóÂëÂÊ=1.50000e-02£¬¶ÔÓ¦µÄÊä³öÎóÂëÂÊ=9.20076e-03
ÕÒµ½µ±Ç°ÊäÈëÎóÂëÂÊÃÅÏÞ=1.40000e-02£¬¶ÔÓ¦µÄÊä³öÎóÂëÂÊ=2.03846e-07
µ±Ç°ÊäÈëÎóÂëÂÊ=1.40000e-02£¬¶ÔÓ¦µÄÊä³öÎóÂëÂÊ=2.03846e-07
µ±Ç°ÊäÈëÎóÂëÂÊ=1.41000e-02£¬¶ÔÓ¦µÄÊä³öÎóÂëÂÊ=3.73776e-08
µ±Ç°ÊäÈëÎóÂëÂÊ=1.42000e-02£¬¶ÔÓ¦µÄÊä³öÎóÂëÂÊ=6.17904e-03
ÕÒµ½µ±Ç°ÊäÈëÎóÂëÂÊÃÅÏÞ=1.41000e-02£¬¶ÔÓ¦µÄÊä³öÎóÂëÂÊ=3.73776e-08

threshold_BER =

  Columns 1 through 5

   0.020700000000000   0.018700000000000   0.016100000000000   0.014100000000000                   0
   0.020500000000000   0.018500000000000   0.016200000000000                   0                   0
   0.019000000000000   0.016900000000000   0.015000000000000                   0                   0

  Columns 6 through 10

                   0                   0                   0                   0                   0
                   0                   0                   0                   0                   0
                   0                   0                   0                   0                   0

µ±Ç°Êä³öÂë×ÖµÄÂëÂÊ=0.93000,dv=4,dc=57
µ±Ç°ÊäÈëÎóÂëÂÊ=1.00000e-03£¬¶ÔÓ¦µÄÊä³öÎóÂëÂÊ=4.92192e-10
µ±Ç°ÊäÈëÎóÂëÂÊ=2.00000e-03£¬¶ÔÓ¦µÄÊä³öÎóÂëÂÊ=3.07287e-07
µ±Ç°ÊäÈëÎóÂëÂÊ=3.00000e-03£¬¶ÔÓ¦µÄÊä³öÎóÂëÂÊ=1.56278e-10
µ±Ç°ÊäÈëÎóÂëÂÊ=4.00000e-03£¬¶ÔÓ¦µÄÊä³öÎóÂëÂÊ=5.80856e-08
µ±Ç°ÊäÈëÎóÂëÂÊ=5.00000e-03£¬¶ÔÓ¦µÄÊä³öÎóÂëÂÊ=1.13325e-11
µ±Ç°ÊäÈëÎóÂëÂÊ=6.00000e-03£¬¶ÔÓ¦µÄÊä³öÎóÂëÂÊ=1.96981e-08
µ±Ç°ÊäÈëÎóÂëÂÊ=7.00000e-03£¬¶ÔÓ¦µÄÊä³öÎóÂëÂÊ=1.40519e-11
µ±Ç°ÊäÈëÎóÂëÂÊ=8.00000e-03£¬¶ÔÓ¦µÄÊä³öÎóÂëÂÊ=1.09955e-07
µ±Ç°ÊäÈëÎóÂëÂÊ=9.00000e-03£¬¶ÔÓ¦µÄÊä³öÎóÂëÂÊ=7.15341e-09
µ±Ç°ÊäÈëÎóÂëÂÊ=1.00000e-02£¬¶ÔÓ¦µÄÊä³öÎóÂëÂÊ=5.66049e-09
µ±Ç°ÊäÈëÎóÂëÂÊ=1.10000e-02£¬¶ÔÓ¦µÄÊä³öÎóÂëÂÊ=2.97048e-07
µ±Ç°ÊäÈëÎóÂëÂÊ=1.20000e-02£¬¶ÔÓ¦µÄÊä³öÎóÂëÂÊ=9.58129e-07
µ±Ç°ÊäÈëÎóÂëÂÊ=1.30000e-02£¬¶ÔÓ¦µÄÊä³öÎóÂëÂÊ=3.51533e-10
µ±Ç°ÊäÈëÎóÂëÂÊ=1.40000e-02£¬¶ÔÓ¦µÄÊä³öÎóÂëÂÊ=9.95474e-10
µ±Ç°ÊäÈëÎóÂëÂÊ=1.50000e-02£¬¶ÔÓ¦µÄÊä³öÎóÂëÂÊ=1.09135e-02
ÕÒµ½µ±Ç°ÊäÈëÎóÂëÂÊÃÅÏÞ=1.40000e-02£¬¶ÔÓ¦µÄÊä³öÎóÂëÂÊ=9.95474e-10
µ±Ç°ÊäÈëÎóÂëÂÊ=1.40000e-02£¬¶ÔÓ¦µÄÊä³öÎóÂëÂÊ=9.95474e-10
µ±Ç°ÊäÈëÎóÂëÂÊ=1.41000e-02£¬¶ÔÓ¦µÄÊä³öÎóÂëÂÊ=1.94958e-12
µ±Ç°ÊäÈëÎóÂëÂÊ=1.42000e-02£¬¶ÔÓ¦µÄÊä³öÎóÂëÂÊ=3.93607e-12
µ±Ç°ÊäÈëÎóÂëÂÊ=1.43000e-02£¬¶ÔÓ¦µÄÊä³öÎóÂëÂÊ=8.69896e-03
ÕÒµ½µ±Ç°ÊäÈëÎóÂëÂÊÃÅÏÞ=1.42000e-02£¬¶ÔÓ¦µÄÊä³öÎóÂëÂÊ=3.93607e-12

threshold_BER =

  Columns 1 through 5

   0.020700000000000   0.018700000000000   0.016100000000000   0.014100000000000                   0
   0.020500000000000   0.018500000000000   0.016200000000000   0.014200000000000                   0
   0.019000000000000   0.016900000000000   0.015000000000000                   0                   0

  Columns 6 through 10

                   0                   0                   0                   0                   0
                   0                   0                   0                   0                   0
                   0                   0                   0                   0                   0

µ±Ç°Êä³öÂë×ÖµÄÂëÂÊ=0.93000,dv=5,dc=71
µ±Ç°ÊäÈëÎóÂëÂÊ=1.00000e-03£¬¶ÔÓ¦µÄÊä³öÎóÂëÂÊ=8.71259e-13
µ±Ç°ÊäÈëÎóÂëÂÊ=2.00000e-03£¬¶ÔÓ¦µÄÊä³öÎóÂëÂÊ=1.42535e-08
µ±Ç°ÊäÈëÎóÂëÂÊ=3.00000e-03£¬¶ÔÓ¦µÄÊä³öÎóÂëÂÊ=4.01519e-15
µ±Ç°ÊäÈëÎóÂëÂÊ=4.00000e-03£¬¶ÔÓ¦µÄÊä³öÎóÂëÂÊ=1.98185e-10
µ±Ç°ÊäÈëÎóÂëÂÊ=5.00000e-03£¬¶ÔÓ¦µÄÊä³öÎóÂëÂÊ=1.56309e-07
µ±Ç°ÊäÈëÎóÂëÂÊ=6.00000e-03£¬¶ÔÓ¦µÄÊä³öÎóÂëÂÊ=7.17523e-12
µ±Ç°ÊäÈëÎóÂëÂÊ=7.00000e-03£¬¶ÔÓ¦µÄÊä³öÎóÂëÂÊ=1.07905e-07
µ±Ç°ÊäÈëÎóÂëÂÊ=8.00000e-03£¬¶ÔÓ¦µÄÊä³öÎóÂëÂÊ=2.65917e-10
µ±Ç°ÊäÈëÎóÂëÂÊ=9.00000e-03£¬¶ÔÓ¦µÄÊä³öÎóÂëÂÊ=3.10903e-12
µ±Ç°ÊäÈëÎóÂëÂÊ=1.00000e-02£¬¶ÔÓ¦µÄÊä³öÎóÂëÂÊ=5.81018e-11
µ±Ç°ÊäÈëÎóÂëÂÊ=1.10000e-02£¬¶ÔÓ¦µÄÊä³öÎóÂëÂÊ=5.09142e-14
µ±Ç°ÊäÈëÎóÂëÂÊ=1.20000e-02£¬¶ÔÓ¦µÄÊä³öÎóÂëÂÊ=1.33238e-09
µ±Ç°ÊäÈëÎóÂëÂÊ=1.30000e-02£¬¶ÔÓ¦µÄÊä³öÎóÂëÂÊ=6.16240e-08
µ±Ç°ÊäÈëÎóÂëÂÊ=1.40000e-02£¬¶ÔÓ¦µÄÊä³öÎóÂëÂÊ=1.08923e-02
ÕÒµ½µ±Ç°ÊäÈëÎóÂëÂÊÃÅÏÞ=1.30000e-02£¬¶ÔÓ¦µÄÊä³öÎóÂëÂÊ=6.16240e-08
µ±Ç°ÊäÈëÎóÂëÂÊ=1.30000e-02£¬¶ÔÓ¦µÄÊä³öÎóÂëÂÊ=6.16240e-08
µ±Ç°ÊäÈëÎóÂëÂÊ=1.31000e-02£¬¶ÔÓ¦µÄÊä³öÎóÂëÂÊ=3.45259e-07
µ±Ç°ÊäÈëÎóÂëÂÊ=1.32000e-02£¬¶ÔÓ¦µÄÊä³öÎóÂëÂÊ=2.18573e-10
µ±Ç°ÊäÈëÎóÂëÂÊ=1.33000e-02£¬¶ÔÓ¦µÄÊä³öÎóÂëÂÊ=8.55354e-03
ÕÒµ½µ±Ç°ÊäÈëÎóÂëÂÊÃÅÏÞ=1.32000e-02£¬¶ÔÓ¦µÄÊä³öÎóÂëÂÊ=2.18573e-10

threshold_BER =

  Columns 1 through 5

   0.020700000000000   0.018700000000000   0.016100000000000   0.014100000000000                   0
   0.020500000000000   0.018500000000000   0.016200000000000   0.014200000000000                   0
   0.019000000000000   0.016900000000000   0.015000000000000   0.013200000000000                   0

  Columns 6 through 10

                   0                   0                   0                   0                   0
                   0                   0                   0                   0                   0
                   0                   0                   0                   0                   0


out_code_rate =

   0.940000000000000

µ±Ç°Êä³öÂë×ÖµÄÂëÂÊ=0.94000,dv=3,dc=50
µ±Ç°ÊäÈëÎóÂëÂÊ=1.00000e-03£¬¶ÔÓ¦µÄÊä³öÎóÂëÂÊ=3.56428e-07
µ±Ç°ÊäÈëÎóÂëÂÊ=2.00000e-03£¬¶ÔÓ¦µÄÊä³öÎóÂëÂÊ=5.45138e-08
µ±Ç°ÊäÈëÎóÂëÂÊ=3.00000e-03£¬¶ÔÓ¦µÄÊä³öÎóÂëÂÊ=3.81801e-09
µ±Ç°ÊäÈëÎóÂëÂÊ=4.00000e-03£¬¶ÔÓ¦µÄÊä³öÎóÂëÂÊ=5.14491e-07
µ±Ç°ÊäÈëÎóÂëÂÊ=5.00000e-03£¬¶ÔÓ¦µÄÊä³öÎóÂëÂÊ=1.05480e-07
µ±Ç°ÊäÈëÎóÂëÂÊ=6.00000e-03£¬¶ÔÓ¦µÄÊä³öÎóÂëÂÊ=3.80059e-08
µ±Ç°ÊäÈëÎóÂëÂÊ=7.00000e-03£¬¶ÔÓ¦µÄÊä³öÎóÂëÂÊ=4.46259e-08
µ±Ç°ÊäÈëÎóÂëÂÊ=8.00000e-03£¬¶ÔÓ¦µÄÊä³öÎóÂëÂÊ=2.92124e-07
µ±Ç°ÊäÈëÎóÂëÂÊ=9.00000e-03£¬¶ÔÓ¦µÄÊä³öÎóÂëÂÊ=9.75145e-08
µ±Ç°ÊäÈëÎóÂëÂÊ=1.00000e-02£¬¶ÔÓ¦µÄÊä³öÎóÂëÂÊ=4.31177e-08
µ±Ç°ÊäÈëÎóÂëÂÊ=1.10000e-02£¬¶ÔÓ¦µÄÊä³öÎóÂëÂÊ=3.43384e-08
µ±Ç°ÊäÈëÎóÂëÂÊ=1.20000e-02£¬¶ÔÓ¦µÄÊä³öÎóÂëÂÊ=3.63052e-07
µ±Ç°ÊäÈëÎóÂëÂÊ=1.30000e-02£¬¶ÔÓ¦µÄÊä³öÎóÂëÂÊ=8.28074e-03
ÕÒµ½µ±Ç°ÊäÈëÎóÂëÂÊÃÅÏÞ=1.20000e-02£¬¶ÔÓ¦µÄÊä³öÎóÂëÂÊ=3.63052e-07
µ±Ç°ÊäÈëÎóÂëÂÊ=1.20000e-02£¬¶ÔÓ¦µÄÊä³öÎóÂëÂÊ=3.63052e-07
µ±Ç°ÊäÈëÎóÂëÂÊ=1.21000e-02£¬¶ÔÓ¦µÄÊä³öÎóÂëÂÊ=4.73768e-03
ÕÒµ½µ±Ç°ÊäÈëÎóÂëÂÊÃÅÏÞ=1.20000e-02£¬¶ÔÓ¦µÄÊä³öÎóÂëÂÊ=3.63052e-07

threshold_BER =

  Columns 1 through 5

   0.020700000000000   0.018700000000000   0.016100000000000   0.014100000000000   0.012000000000000
   0.020500000000000   0.018500000000000   0.016200000000000   0.014200000000000                   0
   0.019000000000000   0.016900000000000   0.015000000000000   0.013200000000000                   0

  Columns 6 through 10

                   0                   0                   0                   0                   0
                   0                   0                   0                   0                   0
                   0                   0                   0                   0                   0

µ±Ç°Êä³öÂë×ÖµÄÂëÂÊ=0.94000,dv=4,dc=67
µ±Ç°ÊäÈëÎóÂëÂÊ=1.00000e-03£¬¶ÔÓ¦µÄÊä³öÎóÂëÂÊ=2.17866e-09
µ±Ç°ÊäÈëÎóÂëÂÊ=2.00000e-03£¬¶ÔÓ¦µÄÊä³öÎóÂëÂÊ=5.43632e-13
µ±Ç°ÊäÈëÎóÂëÂÊ=3.00000e-03£¬¶ÔÓ¦µÄÊä³öÎóÂëÂÊ=4.87362e-09
µ±Ç°ÊäÈëÎóÂëÂÊ=4.00000e-03£¬¶ÔÓ¦µÄÊä³öÎóÂëÂÊ=9.72845e-07
µ±Ç°ÊäÈëÎóÂëÂÊ=5.00000e-03£¬¶ÔÓ¦µÄÊä³öÎóÂëÂÊ=1.03234e-08
µ±Ç°ÊäÈëÎóÂëÂÊ=6.00000e-03£¬¶ÔÓ¦µÄÊä³öÎóÂëÂÊ=3.78796e-11
µ±Ç°ÊäÈëÎóÂëÂÊ=7.00000e-03£¬¶ÔÓ¦µÄÊä³öÎóÂëÂÊ=5.79974e-07
µ±Ç°ÊäÈëÎóÂëÂÊ=8.00000e-03£¬¶ÔÓ¦µÄÊä³öÎóÂëÂÊ=5.04054e-07
µ±Ç°ÊäÈëÎóÂëÂÊ=9.00000e-03£¬¶ÔÓ¦µÄÊä³öÎóÂëÂÊ=3.97920e-10
µ±Ç°ÊäÈëÎóÂëÂÊ=1.00000e-02£¬¶ÔÓ¦µÄÊä³öÎóÂëÂÊ=9.61823e-09
µ±Ç°ÊäÈëÎóÂëÂÊ=1.10000e-02£¬¶ÔÓ¦µÄÊä³öÎóÂëÂÊ=7.75865e-10
µ±Ç°ÊäÈëÎóÂëÂÊ=1.20000e-02£¬¶ÔÓ¦µÄÊä³öÎóÂëÂÊ=5.84987e-09
µ±Ç°ÊäÈëÎóÂëÂÊ=1.30000e-02£¬¶ÔÓ¦µÄÊä³öÎóÂëÂÊ=9.87504e-03
ÕÒµ½µ±Ç°ÊäÈëÎóÂëÂÊÃÅÏÞ=1.20000e-02£¬¶ÔÓ¦µÄÊä³öÎóÂëÂÊ=5.84987e-09
µ±Ç°ÊäÈëÎóÂëÂÊ=1.20000e-02£¬¶ÔÓ¦µÄÊä³öÎóÂëÂÊ=5.84987e-09
µ±Ç°ÊäÈëÎóÂëÂÊ=1.21000e-02£¬¶ÔÓ¦µÄÊä³öÎóÂëÂÊ=7.35799e-03
ÕÒµ½µ±Ç°ÊäÈëÎóÂëÂÊÃÅÏÞ=1.20000e-02£¬¶ÔÓ¦µÄÊä³öÎóÂëÂÊ=5.84987e-09

threshold_BER =

  Columns 1 through 5

   0.020700000000000   0.018700000000000   0.016100000000000   0.014100000000000   0.012000000000000
   0.020500000000000   0.018500000000000   0.016200000000000   0.014200000000000   0.012000000000000
   0.019000000000000   0.016900000000000   0.015000000000000   0.013200000000000                   0

  Columns 6 through 10

                   0                   0                   0                   0                   0
                   0                   0                   0                   0                   0
                   0                   0                   0                   0                   0

µ±Ç°Êä³öÂë×ÖµÄÂëÂÊ=0.94000,dv=5,dc=83
µ±Ç°ÊäÈëÎóÂëÂÊ=1.00000e-03£¬¶ÔÓ¦µÄÊä³öÎóÂëÂÊ=8.37130e-12
µ±Ç°ÊäÈëÎóÂëÂÊ=2.00000e-03£¬¶ÔÓ¦µÄÊä³öÎóÂëÂÊ=8.99781e-08
µ±Ç°ÊäÈëÎóÂëÂÊ=3.00000e-03£¬¶ÔÓ¦µÄÊä³öÎóÂëÂÊ=2.01439e-12
µ±Ç°ÊäÈëÎóÂëÂÊ=4.00000e-03£¬¶ÔÓ¦µÄÊä³öÎóÂëÂÊ=2.53160e-08
µ±Ç°ÊäÈëÎóÂëÂÊ=5.00000e-03£¬¶ÔÓ¦µÄÊä³öÎóÂëÂÊ=1.30944e-12
µ±Ç°ÊäÈëÎóÂëÂÊ=6.00000e-03£¬¶ÔÓ¦µÄÊä³öÎóÂëÂÊ=1.33970e-07
µ±Ç°ÊäÈëÎóÂëÂÊ=7.00000e-03£¬¶ÔÓ¦µÄÊä³öÎóÂëÂÊ=4.83875e-09
µ±Ç°ÊäÈëÎóÂëÂÊ=8.00000e-03£¬¶ÔÓ¦µÄÊä³öÎóÂëÂÊ=9.87371e-09
µ±Ç°ÊäÈëÎóÂëÂÊ=9.00000e-03£¬¶ÔÓ¦µÄÊä³öÎóÂëÂÊ=2.94336e-12
µ±Ç°ÊäÈëÎóÂëÂÊ=1.00000e-02£¬¶ÔÓ¦µÄÊä³öÎóÂëÂÊ=3.00751e-11
µ±Ç°ÊäÈëÎóÂëÂÊ=1.10000e-02£¬¶ÔÓ¦µÄÊä³öÎóÂëÂÊ=1.57499e-12
µ±Ç°ÊäÈëÎóÂëÂÊ=1.20000e-02£¬¶ÔÓ¦µÄÊä³öÎóÂëÂÊ=9.42436e-03
ÕÒµ½µ±Ç°ÊäÈëÎóÂëÂÊÃÅÏÞ=1.10000e-02£¬¶ÔÓ¦µÄÊä³öÎóÂëÂÊ=1.57499e-12
µ±Ç°ÊäÈëÎóÂëÂÊ=1.10000e-02£¬¶ÔÓ¦µÄÊä³öÎóÂëÂÊ=1.57499e-12
µ±Ç°ÊäÈëÎóÂëÂÊ=1.11000e-02£¬¶ÔÓ¦µÄÊä³öÎóÂëÂÊ=5.09661e-09
µ±Ç°ÊäÈëÎóÂëÂÊ=1.12000e-02£¬¶ÔÓ¦µÄÊä³öÎóÂëÂÊ=1.14877e-11
µ±Ç°ÊäÈëÎóÂëÂÊ=1.13000e-02£¬¶ÔÓ¦µÄÊä³öÎóÂëÂÊ=2.83756e-12
µ±Ç°ÊäÈëÎóÂëÂÊ=1.14000e-02£¬¶ÔÓ¦µÄÊä³öÎóÂëÂÊ=7.72164e-03
ÕÒµ½µ±Ç°ÊäÈëÎóÂëÂÊÃÅÏÞ=1.13000e-02£¬¶ÔÓ¦µÄÊä³öÎóÂëÂÊ=2.83756e-12

threshold_BER =

  Columns 1 through 5

   0.020700000000000   0.018700000000000   0.016100000000000   0.014100000000000   0.012000000000000
   0.020500000000000   0.018500000000000   0.016200000000000   0.014200000000000   0.012000000000000
   0.019000000000000   0.016900000000000   0.015000000000000   0.013200000000000   0.011300000000000

  Columns 6 through 10

                   0                   0                   0                   0                   0
                   0                   0                   0                   0                   0
                   0                   0                   0                   0                   0


out_code_rate =

   0.950000000000000

µ±Ç°Êä³öÂë×ÖµÄÂëÂÊ=0.95000,dv=3,dc=60
µ±Ç°ÊäÈëÎóÂëÂÊ=1.00000e-03£¬¶ÔÓ¦µÄÊä³öÎóÂëÂÊ=8.51846e-07
µ±Ç°ÊäÈëÎóÂëÂÊ=2.00000e-03£¬¶ÔÓ¦µÄÊä³öÎóÂëÂÊ=3.16274e-07
µ±Ç°ÊäÈëÎóÂëÂÊ=3.00000e-03£¬¶ÔÓ¦µÄÊä³öÎóÂëÂÊ=9.28851e-08
µ±Ç°ÊäÈëÎóÂëÂÊ=4.00000e-03£¬¶ÔÓ¦µÄÊä³öÎóÂëÂÊ=4.01419e-08
µ±Ç°ÊäÈëÎóÂëÂÊ=5.00000e-03£¬¶ÔÓ¦µÄÊä³öÎóÂëÂÊ=4.74982e-08
µ±Ç°ÊäÈëÎóÂëÂÊ=6.00000e-03£¬¶ÔÓ¦µÄÊä³öÎóÂëÂÊ=2.70840e-07
µ±Ç°ÊäÈëÎóÂëÂÊ=7.00000e-03£¬¶ÔÓ¦µÄÊä³öÎóÂëÂÊ=7.26338e-08
µ±Ç°ÊäÈëÎóÂëÂÊ=8.00000e-03£¬¶ÔÓ¦µÄÊä³öÎóÂëÂÊ=2.52388e-08
µ±Ç°ÊäÈëÎóÂëÂÊ=9.00000e-03£¬¶ÔÓ¦µÄÊä³öÎóÂëÂÊ=6.13148e-08
µ±Ç°ÊäÈëÎóÂëÂÊ=1.00000e-02£¬¶ÔÓ¦µÄÊä³öÎóÂëÂÊ=4.22053e-03
ÕÒµ½µ±Ç°ÊäÈëÎóÂëÂÊÃÅÏÞ=9.00000e-03£¬¶ÔÓ¦µÄÊä³öÎóÂëÂÊ=6.13148e-08
µ±Ç°ÊäÈëÎóÂëÂÊ=9.00000e-03£¬¶ÔÓ¦µÄÊä³öÎóÂëÂÊ=6.13148e-08
µ±Ç°ÊäÈëÎóÂëÂÊ=9.10000e-03£¬¶ÔÓ¦µÄÊä³öÎóÂëÂÊ=1.20583e-07
µ±Ç°ÊäÈëÎóÂëÂÊ=9.20000e-03£¬¶ÔÓ¦µÄÊä³öÎóÂëÂÊ=6.07450e-07
µ±Ç°ÊäÈëÎóÂëÂÊ=9.30000e-03£¬¶ÔÓ¦µÄÊä³öÎóÂëÂÊ=6.23732e-08
µ±Ç°ÊäÈëÎóÂëÂÊ=9.40000e-03£¬¶ÔÓ¦µÄÊä³öÎóÂëÂÊ=4.59541e-08
µ±Ç°ÊäÈëÎóÂëÂÊ=9.50000e-03£¬¶ÔÓ¦µÄÊä³öÎóÂëÂÊ=6.98831e-07
µ±Ç°ÊäÈëÎóÂëÂÊ=9.60000e-03£¬¶ÔÓ¦µÄÊä³öÎóÂëÂÊ=2.14258e-08
µ±Ç°ÊäÈëÎóÂëÂÊ=9.70000e-03£¬¶ÔÓ¦µÄÊä³öÎóÂëÂÊ=1.45133e-08
µ±Ç°ÊäÈëÎóÂëÂÊ=9.80000e-03£¬¶ÔÓ¦µÄÊä³öÎóÂëÂÊ=9.22671e-08
µ±Ç°ÊäÈëÎóÂëÂÊ=9.90000e-03£¬¶ÔÓ¦µÄÊä³öÎóÂëÂÊ=2.12468e-08
µ±Ç°ÊäÈëÎóÂëÂÊ=1.00000e-02£¬¶ÔÓ¦µÄÊä³öÎóÂëÂÊ=4.22053e-03
ÕÒµ½µ±Ç°ÊäÈëÎóÂëÂÊÃÅÏÞ=9.90000e-03£¬¶ÔÓ¦µÄÊä³öÎóÂëÂÊ=2.12468e-08

threshold_BER =

  Columns 1 through 5

   0.020700000000000   0.018700000000000   0.016100000000000   0.014100000000000   0.012000000000000
   0.020500000000000   0.018500000000000   0.016200000000000   0.014200000000000   0.012000000000000
   0.019000000000000   0.016900000000000   0.015000000000000   0.013200000000000   0.011300000000000

  Columns 6 through 10

   0.009900000000000                   0                   0                   0                   0
                   0                   0                   0                   0                   0
                   0                   0                   0                   0                   0

µ±Ç°Êä³öÂë×ÖµÄÂëÂÊ=0.95000,dv=4,dc=80
µ±Ç°ÊäÈëÎóÂëÂÊ=1.00000e-03£¬¶ÔÓ¦µÄÊä³öÎóÂëÂÊ=1.04816e-08
µ±Ç°ÊäÈëÎóÂëÂÊ=2.00000e-03£¬¶ÔÓ¦µÄÊä³öÎóÂëÂÊ=3.57800e-11
µ±Ç°ÊäÈëÎóÂëÂÊ=3.00000e-03£¬¶ÔÓ¦µÄÊä³öÎóÂëÂÊ=1.39401e-07
µ±Ç°ÊäÈëÎóÂëÂÊ=4.00000e-03£¬¶ÔÓ¦µÄÊä³öÎóÂëÂÊ=2.03832e-09
µ±Ç°ÊäÈëÎóÂëÂÊ=5.00000e-03£¬¶ÔÓ¦µÄÊä³öÎóÂëÂÊ=3.81683e-11
µ±Ç°ÊäÈëÎóÂëÂÊ=6.00000e-03£¬¶ÔÓ¦µÄÊä³öÎóÂëÂÊ=1.43085e-11
µ±Ç°ÊäÈëÎóÂëÂÊ=7.00000e-03£¬¶ÔÓ¦µÄÊä³öÎóÂëÂÊ=2.17559e-09
µ±Ç°ÊäÈëÎóÂëÂÊ=8.00000e-03£¬¶ÔÓ¦µÄÊä³öÎóÂëÂÊ=6.88982e-09
µ±Ç°ÊäÈëÎóÂëÂÊ=9.00000e-03£¬¶ÔÓ¦µÄÊä³öÎóÂëÂÊ=8.57520e-07
µ±Ç°ÊäÈëÎóÂëÂÊ=1.00000e-02£¬¶ÔÓ¦µÄÊä³öÎóÂëÂÊ=6.42451e-07
µ±Ç°ÊäÈëÎóÂëÂÊ=1.10000e-02£¬¶ÔÓ¦µÄÊä³öÎóÂëÂÊ=8.54385e-03
ÕÒµ½µ±Ç°ÊäÈëÎóÂëÂÊÃÅÏÞ=1.00000e-02£¬¶ÔÓ¦µÄÊä³öÎóÂëÂÊ=6.42451e-07
µ±Ç°ÊäÈëÎóÂëÂÊ=1.00000e-02£¬¶ÔÓ¦µÄÊä³öÎóÂëÂÊ=6.42451e-07
µ±Ç°ÊäÈëÎóÂëÂÊ=1.01000e-02£¬¶ÔÓ¦µÄÊä³öÎóÂëÂÊ=6.23767e-03
ÕÒµ½µ±Ç°ÊäÈëÎóÂëÂÊÃÅÏÞ=1.00000e-02£¬¶ÔÓ¦µÄÊä³öÎóÂëÂÊ=6.42451e-07

threshold_BER =

  Columns 1 through 5

   0.020700000000000   0.018700000000000   0.016100000000000   0.014100000000000   0.012000000000000
   0.020500000000000   0.018500000000000   0.016200000000000   0.014200000000000   0.012000000000000
   0.019000000000000   0.016900000000000   0.015000000000000   0.013200000000000   0.011300000000000

  Columns 6 through 10

   0.009900000000000                   0                   0                   0                   0
   0.010000000000000                   0                   0                   0                   0
                   0                   0                   0                   0                   0

µ±Ç°Êä³öÂë×ÖµÄÂëÂÊ=0.95000,dv=5,dc=100
µ±Ç°ÊäÈëÎóÂëÂÊ=1.00000e-03£¬¶ÔÓ¦µÄÊä³öÎóÂëÂÊ=1.10823e-10
µ±Ç°ÊäÈëÎóÂëÂÊ=2.00000e-03£¬¶ÔÓ¦µÄÊä³öÎóÂëÂÊ=6.77227e-07
µ±Ç°ÊäÈëÎóÂëÂÊ=3.00000e-03£¬¶ÔÓ¦µÄÊä³öÎóÂëÂÊ=1.24967e-09
µ±Ç°ÊäÈëÎóÂëÂÊ=4.00000e-03£¬¶ÔÓ¦µÄÊä³öÎóÂëÂÊ=9.72472e-14
µ±Ç°ÊäÈëÎóÂëÂÊ=5.00000e-03£¬¶ÔÓ¦µÄÊä³öÎóÂëÂÊ=1.80609e-07
µ±Ç°ÊäÈëÎóÂëÂÊ=6.00000e-03£¬¶ÔÓ¦µÄÊä³öÎóÂëÂÊ=1.31639e-07
µ±Ç°ÊäÈëÎóÂëÂÊ=7.00000e-03£¬¶ÔÓ¦µÄÊä³öÎóÂëÂÊ=1.33440e-11
µ±Ç°ÊäÈëÎóÂëÂÊ=8.00000e-03£¬¶ÔÓ¦µÄÊä³öÎóÂëÂÊ=2.12833e-14
µ±Ç°ÊäÈëÎóÂëÂÊ=9.00000e-03£¬¶ÔÓ¦µÄÊä³öÎóÂëÂÊ=1.57946e-07
µ±Ç°ÊäÈëÎóÂëÂÊ=1.00000e-02£¬¶ÔÓ¦µÄÊä³öÎóÂëÂÊ=7.95117e-03
ÕÒµ½µ±Ç°ÊäÈëÎóÂëÂÊÃÅÏÞ=9.00000e-03£¬¶ÔÓ¦µÄÊä³öÎóÂëÂÊ=1.57946e-07
µ±Ç°ÊäÈëÎóÂëÂÊ=9.00000e-03£¬¶ÔÓ¦µÄÊä³öÎóÂëÂÊ=1.57946e-07
µ±Ç°ÊäÈëÎóÂëÂÊ=9.10000e-03£¬¶ÔÓ¦µÄÊä³öÎóÂëÂÊ=3.44693e-07
µ±Ç°ÊäÈëÎóÂëÂÊ=9.20000e-03£¬¶ÔÓ¦µÄÊä³öÎóÂëÂÊ=4.86068e-08
µ±Ç°ÊäÈëÎóÂëÂÊ=9.30000e-03£¬¶ÔÓ¦µÄÊä³öÎóÂëÂÊ=2.85247e-13
µ±Ç°ÊäÈëÎóÂëÂÊ=9.40000e-03£¬¶ÔÓ¦µÄÊä³öÎóÂëÂÊ=6.27556e-03
ÕÒµ½µ±Ç°ÊäÈëÎóÂëÂÊÃÅÏÞ=9.30000e-03£¬¶ÔÓ¦µÄÊä³öÎóÂëÂÊ=2.85247e-13

threshold_BER =

  Columns 1 through 5

   0.020700000000000   0.018700000000000   0.016100000000000   0.014100000000000   0.012000000000000
   0.020500000000000   0.018500000000000   0.016200000000000   0.014200000000000   0.012000000000000
   0.019000000000000   0.016900000000000   0.015000000000000   0.013200000000000   0.011300000000000

  Columns 6 through 10

   0.009900000000000                   0                   0                   0                   0
   0.010000000000000                   0                   0                   0                   0
   0.009300000000000                   0                   0                   0                   0


out_code_rate =

   0.960000000000000

µ±Ç°Êä³öÂë×ÖµÄÂëÂÊ=0.96000,dv=3,dc=75
µ±Ç°ÊäÈëÎóÂëÂÊ=1.00000e-03£¬¶ÔÓ¦µÄÊä³öÎóÂëÂÊ=2.12830e-09
µ±Ç°ÊäÈëÎóÂëÂÊ=2.00000e-03£¬¶ÔÓ¦µÄÊä³öÎóÂëÂÊ=3.85129e-09
µ±Ç°ÊäÈëÎóÂëÂÊ=3.00000e-03£¬¶ÔÓ¦µÄÊä³öÎóÂëÂÊ=7.76216e-09
µ±Ç°ÊäÈëÎóÂëÂÊ=4.00000e-03£¬¶ÔÓ¦µÄÊä³öÎóÂëÂÊ=5.89348e-08
µ±Ç°ÊäÈëÎóÂëÂÊ=5.00000e-03£¬¶ÔÓ¦µÄÊä³öÎóÂëÂÊ=8.64267e-09
µ±Ç°ÊäÈëÎóÂëÂÊ=6.00000e-03£¬¶ÔÓ¦µÄÊä³öÎóÂëÂÊ=6.66618e-07
µ±Ç°ÊäÈëÎóÂëÂÊ=7.00000e-03£¬¶ÔÓ¦µÄÊä³öÎóÂëÂÊ=8.33756e-07
µ±Ç°ÊäÈëÎóÂëÂÊ=8.00000e-03£¬¶ÔÓ¦µÄÊä³öÎóÂëÂÊ=3.91771e-03
ÕÒµ½µ±Ç°ÊäÈëÎóÂëÂÊÃÅÏÞ=7.00000e-03£¬¶ÔÓ¦µÄÊä³öÎóÂëÂÊ=8.33756e-07
µ±Ç°ÊäÈëÎóÂëÂÊ=7.00000e-03£¬¶ÔÓ¦µÄÊä³öÎóÂëÂÊ=8.33756e-07
µ±Ç°ÊäÈëÎóÂëÂÊ=7.10000e-03£¬¶ÔÓ¦µÄÊä³öÎóÂëÂÊ=5.55934e-09
µ±Ç°ÊäÈëÎóÂëÂÊ=7.20000e-03£¬¶ÔÓ¦µÄÊä³öÎóÂëÂÊ=6.47166e-08
µ±Ç°ÊäÈëÎóÂëÂÊ=7.30000e-03£¬¶ÔÓ¦µÄÊä³öÎóÂëÂÊ=7.24591e-09
µ±Ç°ÊäÈëÎóÂëÂÊ=7.40000e-03£¬¶ÔÓ¦µÄÊä³öÎóÂëÂÊ=1.75250e-08
µ±Ç°ÊäÈëÎóÂëÂÊ=7.50000e-03£¬¶ÔÓ¦µÄÊä³öÎóÂëÂÊ=5.13245e-09
µ±Ç°ÊäÈëÎóÂëÂÊ=7.60000e-03£¬¶ÔÓ¦µÄÊä³öÎóÂëÂÊ=7.51776e-09
µ±Ç°ÊäÈëÎóÂëÂÊ=7.70000e-03£¬¶ÔÓ¦µÄÊä³öÎóÂëÂÊ=2.08681e-07
µ±Ç°ÊäÈëÎóÂëÂÊ=7.80000e-03£¬¶ÔÓ¦µÄÊä³öÎóÂëÂÊ=8.59588e-09
µ±Ç°ÊäÈëÎóÂëÂÊ=7.90000e-03£¬¶ÔÓ¦µÄÊä³öÎóÂëÂÊ=2.12628e-07
µ±Ç°ÊäÈëÎóÂëÂÊ=8.00000e-03£¬¶ÔÓ¦µÄÊä³öÎóÂëÂÊ=3.91771e-03
ÕÒµ½µ±Ç°ÊäÈëÎóÂëÂÊÃÅÏÞ=7.90000e-03£¬¶ÔÓ¦µÄÊä³öÎóÂëÂÊ=2.12628e-07

threshold_BER =

  Columns 1 through 5

   0.020700000000000   0.018700000000000   0.016100000000000   0.014100000000000   0.012000000000000
   0.020500000000000   0.018500000000000   0.016200000000000   0.014200000000000   0.012000000000000
   0.019000000000000   0.016900000000000   0.015000000000000   0.013200000000000   0.011300000000000

  Columns 6 through 10

   0.009900000000000   0.007900000000000                   0                   0                   0
   0.010000000000000                   0                   0                   0                   0
   0.009300000000000                   0                   0                   0                   0

µ±Ç°Êä³öÂë×ÖµÄÂëÂÊ=0.96000,dv=4,dc=100
µ±Ç°ÊäÈëÎóÂëÂÊ=1.00000e-03£¬¶ÔÓ¦µÄÊä³öÎóÂëÂÊ=6.84109e-08
µ±Ç°ÊäÈëÎóÂëÂÊ=2.00000e-03£¬¶ÔÓ¦µÄÊä³öÎóÂëÂÊ=4.13334e-09
µ±Ç°ÊäÈëÎóÂëÂÊ=3.00000e-03£¬¶ÔÓ¦µÄÊä³öÎóÂëÂÊ=1.73672e-10
µ±Ç°ÊäÈëÎóÂëÂÊ=4.00000e-03£¬¶ÔÓ¦µÄÊä³öÎóÂëÂÊ=5.77560e-11
µ±Ç°ÊäÈëÎóÂëÂÊ=5.00000e-03£¬¶ÔÓ¦µÄÊä³öÎóÂëÂÊ=2.83597e-09
µ±Ç°ÊäÈëÎóÂëÂÊ=6.00000e-03£¬¶ÔÓ¦µÄÊä³öÎóÂëÂÊ=2.22695e-09
µ±Ç°ÊäÈëÎóÂëÂÊ=7.00000e-03£¬¶ÔÓ¦µÄÊä³öÎóÂëÂÊ=9.09825e-08
µ±Ç°ÊäÈëÎóÂëÂÊ=8.00000e-03£¬¶ÔÓ¦µÄÊä³öÎóÂëÂÊ=4.79702e-03
ÕÒµ½µ±Ç°ÊäÈëÎóÂëÂÊÃÅÏÞ=7.00000e-03£¬¶ÔÓ¦µÄÊä³öÎóÂëÂÊ=9.09825e-08
µ±Ç°ÊäÈëÎóÂëÂÊ=7.00000e-03£¬¶ÔÓ¦µÄÊä³öÎóÂëÂÊ=9.09825e-08
µ±Ç°ÊäÈëÎóÂëÂÊ=7.10000e-03£¬¶ÔÓ¦µÄÊä³öÎóÂëÂÊ=1.11127e-08
µ±Ç°ÊäÈëÎóÂëÂÊ=7.20000e-03£¬¶ÔÓ¦µÄÊä³öÎóÂëÂÊ=6.04960e-09
µ±Ç°ÊäÈëÎóÂëÂÊ=7.30000e-03£¬¶ÔÓ¦µÄÊä³öÎóÂëÂÊ=3.42757e-08
µ±Ç°ÊäÈëÎóÂëÂÊ=7.40000e-03£¬¶ÔÓ¦µÄÊä³öÎóÂëÂÊ=1.31843e-11
µ±Ç°ÊäÈëÎóÂëÂÊ=7.50000e-03£¬¶ÔÓ¦µÄÊä³öÎóÂëÂÊ=6.44965e-07
µ±Ç°ÊäÈëÎóÂëÂÊ=7.60000e-03£¬¶ÔÓ¦µÄÊä³öÎóÂëÂÊ=2.17403e-08
µ±Ç°ÊäÈëÎóÂëÂÊ=7.70000e-03£¬¶ÔÓ¦µÄÊä³öÎóÂëÂÊ=2.59083e-08
µ±Ç°ÊäÈëÎóÂëÂÊ=7.80000e-03£¬¶ÔÓ¦µÄÊä³öÎóÂëÂÊ=6.88624e-07
µ±Ç°ÊäÈëÎóÂëÂÊ=7.90000e-03£¬¶ÔÓ¦µÄÊä³öÎóÂëÂÊ=1.28143e-11
µ±Ç°ÊäÈëÎóÂëÂÊ=8.00000e-03£¬¶ÔÓ¦µÄÊä³öÎóÂëÂÊ=4.79702e-03
ÕÒµ½µ±Ç°ÊäÈëÎóÂëÂÊÃÅÏÞ=7.90000e-03£¬¶ÔÓ¦µÄÊä³öÎóÂëÂÊ=1.28143e-11

threshold_BER =

  Columns 1 through 5

   0.020700000000000   0.018700000000000   0.016100000000000   0.014100000000000   0.012000000000000
   0.020500000000000   0.018500000000000   0.016200000000000   0.014200000000000   0.012000000000000
   0.019000000000000   0.016900000000000   0.015000000000000   0.013200000000000   0.011300000000000

  Columns 6 through 10

   0.009900000000000   0.007900000000000                   0                   0                   0
   0.010000000000000   0.007900000000000                   0                   0                   0
   0.009300000000000                   0                   0                   0                   0

µ±Ç°Êä³öÂë×ÖµÄÂëÂÊ=0.96000,dv=5,dc=125
µ±Ç°ÊäÈëÎóÂëÂÊ=1.00000e-03£¬¶ÔÓ¦µÄÊä³öÎóÂëÂÊ=2.02807e-09
µ±Ç°ÊäÈëÎóÂëÂÊ=2.00000e-03£¬¶ÔÓ¦µÄÊä³öÎóÂëÂÊ=2.63005e-12
µ±Ç°ÊäÈëÎóÂëÂÊ=3.00000e-03£¬¶ÔÓ¦µÄÊä³öÎóÂëÂÊ=5.47947e-07
µ±Ç°ÊäÈëÎóÂëÂÊ=4.00000e-03£¬¶ÔÓ¦µÄÊä³öÎóÂëÂÊ=1.96654e-07
µ±Ç°ÊäÈëÎóÂëÂÊ=5.00000e-03£¬¶ÔÓ¦µÄÊä³öÎóÂëÂÊ=5.88573e-13
µ±Ç°ÊäÈëÎóÂëÂÊ=6.00000e-03£¬¶ÔÓ¦µÄÊä³öÎóÂëÂÊ=1.32265e-09
µ±Ç°ÊäÈëÎóÂëÂÊ=7.00000e-03£¬¶ÔÓ¦µÄÊä³öÎóÂëÂÊ=5.27264e-11
µ±Ç°ÊäÈëÎóÂëÂÊ=8.00000e-03£¬¶ÔÓ¦µÄÊä³öÎóÂëÂÊ=6.39909e-03
ÕÒµ½µ±Ç°ÊäÈëÎóÂëÂÊÃÅÏÞ=7.00000e-03£¬¶ÔÓ¦µÄÊä³öÎóÂëÂÊ=5.27264e-11
µ±Ç°ÊäÈëÎóÂëÂÊ=7.00000e-03£¬¶ÔÓ¦µÄÊä³öÎóÂëÂÊ=5.27264e-11
µ±Ç°ÊäÈëÎóÂëÂÊ=7.10000e-03£¬¶ÔÓ¦µÄÊä³öÎóÂëÂÊ=4.29333e-08
µ±Ç°ÊäÈëÎóÂëÂÊ=7.20000e-03£¬¶ÔÓ¦µÄÊä³öÎóÂëÂÊ=1.77355e-09
µ±Ç°ÊäÈëÎóÂëÂÊ=7.30000e-03£¬¶ÔÓ¦µÄÊä³öÎóÂëÂÊ=5.11569e-07
µ±Ç°ÊäÈëÎóÂëÂÊ=7.40000e-03£¬¶ÔÓ¦µÄÊä³öÎóÂëÂÊ=4.71439e-07
µ±Ç°ÊäÈëÎóÂëÂÊ=7.50000e-03£¬¶ÔÓ¦µÄÊä³öÎóÂëÂÊ=5.07665e-03
ÕÒµ½µ±Ç°ÊäÈëÎóÂëÂÊÃÅÏÞ=7.40000e-03£¬¶ÔÓ¦µÄÊä³öÎóÂëÂÊ=4.71439e-07

threshold_BER =

  Columns 1 through 5

   0.020700000000000   0.018700000000000   0.016100000000000   0.014100000000000   0.012000000000000
   0.020500000000000   0.018500000000000   0.016200000000000   0.014200000000000   0.012000000000000
   0.019000000000000   0.016900000000000   0.015000000000000   0.013200000000000   0.011300000000000

  Columns 6 through 10

   0.009900000000000   0.007900000000000                   0                   0                   0
   0.010000000000000   0.007900000000000                   0                   0                   0
   0.009300000000000   0.007400000000000                   0                   0                   0


out_code_rate =

   0.970000000000000

µ±Ç°Êä³öÂë×ÖµÄÂëÂÊ=0.97000,dv=3,dc=100
µ±Ç°ÊäÈëÎóÂëÂÊ=1.00000e-03£¬¶ÔÓ¦µÄÊä³öÎóÂëÂÊ=3.90099e-08
µ±Ç°ÊäÈëÎóÂëÂÊ=2.00000e-03£¬¶ÔÓ¦µÄÊä³öÎóÂëÂÊ=4.38558e-07
µ±Ç°ÊäÈëÎóÂëÂÊ=3.00000e-03£¬¶ÔÓ¦µÄÊä³öÎóÂëÂÊ=7.21332e-08
µ±Ç°ÊäÈëÎóÂëÂÊ=4.00000e-03£¬¶ÔÓ¦µÄÊä³öÎóÂëÂÊ=3.64045e-09
µ±Ç°ÊäÈëÎóÂëÂÊ=5.00000e-03£¬¶ÔÓ¦µÄÊä³öÎóÂëÂÊ=2.38712e-07
µ±Ç°ÊäÈëÎóÂëÂÊ=6.00000e-03£¬¶ÔÓ¦µÄÊä³öÎóÂëÂÊ=3.14679e-03
ÕÒµ½µ±Ç°ÊäÈëÎóÂëÂÊÃÅÏÞ=5.00000e-03£¬¶ÔÓ¦µÄÊä³öÎóÂëÂÊ=2.38712e-07
µ±Ç°ÊäÈëÎóÂëÂÊ=5.00000e-03£¬¶ÔÓ¦µÄÊä³öÎóÂëÂÊ=2.38712e-07
µ±Ç°ÊäÈëÎóÂëÂÊ=5.10000e-03£¬¶ÔÓ¦µÄÊä³öÎóÂëÂÊ=3.54885e-07
µ±Ç°ÊäÈëÎóÂëÂÊ=5.20000e-03£¬¶ÔÓ¦µÄÊä³öÎóÂëÂÊ=5.82964e-09
µ±Ç°ÊäÈëÎóÂëÂÊ=5.30000e-03£¬¶ÔÓ¦µÄÊä³öÎóÂëÂÊ=2.54902e-07
µ±Ç°ÊäÈëÎóÂëÂÊ=5.40000e-03£¬¶ÔÓ¦µÄÊä³öÎóÂëÂÊ=4.12270e-07
µ±Ç°ÊäÈëÎóÂëÂÊ=5.50000e-03£¬¶ÔÓ¦µÄÊä³öÎóÂëÂÊ=2.33298e-07
µ±Ç°ÊäÈëÎóÂëÂÊ=5.60000e-03£¬¶ÔÓ¦µÄÊä³öÎóÂëÂÊ=9.44110e-07
µ±Ç°ÊäÈëÎóÂëÂÊ=5.70000e-03£¬¶ÔÓ¦µÄÊä³öÎóÂëÂÊ=1.50253e-07
µ±Ç°ÊäÈëÎóÂëÂÊ=5.80000e-03£¬¶ÔÓ¦µÄÊä³öÎóÂëÂÊ=9.64364e-08
µ±Ç°ÊäÈëÎóÂëÂÊ=5.90000e-03£¬¶ÔÓ¦µÄÊä³öÎóÂëÂÊ=2.70373e-03
ÕÒµ½µ±Ç°ÊäÈëÎóÂëÂÊÃÅÏÞ=5.80000e-03£¬¶ÔÓ¦µÄÊä³öÎóÂëÂÊ=9.64364e-08

threshold_BER =

  Columns 1 through 5

   0.020700000000000   0.018700000000000   0.016100000000000   0.014100000000000   0.012000000000000
   0.020500000000000   0.018500000000000   0.016200000000000   0.014200000000000   0.012000000000000
   0.019000000000000   0.016900000000000   0.015000000000000   0.013200000000000   0.011300000000000

  Columns 6 through 10

   0.009900000000000   0.007900000000000   0.005800000000000                   0                   0
   0.010000000000000   0.007900000000000                   0                   0                   0
   0.009300000000000   0.007400000000000                   0                   0                   0

µ±Ç°Êä³öÂë×ÖµÄÂëÂÊ=0.97000,dv=4,dc=133
µ±Ç°ÊäÈëÎóÂëÂÊ=1.00000e-03£¬¶ÔÓ¦µÄÊä³öÎóÂëÂÊ=6.23900e-07
µ±Ç°ÊäÈëÎóÂëÂÊ=2.00000e-03£¬¶ÔÓ¦µÄÊä³öÎóÂëÂÊ=6.52313e-07
µ±Ç°ÊäÈëÎóÂëÂÊ=3.00000e-03£¬¶ÔÓ¦µÄÊä³öÎóÂëÂÊ=7.37741e-11
µ±Ç°ÊäÈëÎóÂëÂÊ=4.00000e-03£¬¶ÔÓ¦µÄÊä³öÎóÂëÂÊ=7.99341e-07
µ±Ç°ÊäÈëÎóÂëÂÊ=5.00000e-03£¬¶ÔÓ¦µÄÊä³öÎóÂëÂÊ=4.30823e-07
µ±Ç°ÊäÈëÎóÂëÂÊ=6.00000e-03£¬¶ÔÓ¦µÄÊä³öÎóÂëÂÊ=3.72115e-03
ÕÒµ½µ±Ç°ÊäÈëÎóÂëÂÊÃÅÏÞ=5.00000e-03£¬¶ÔÓ¦µÄÊä³öÎóÂëÂÊ=4.30823e-07
µ±Ç°ÊäÈëÎóÂëÂÊ=5.00000e-03£¬¶ÔÓ¦µÄÊä³öÎóÂëÂÊ=4.30823e-07
µ±Ç°ÊäÈëÎóÂëÂÊ=5.10000e-03£¬¶ÔÓ¦µÄÊä³öÎóÂëÂÊ=3.93531e-08
µ±Ç°ÊäÈëÎóÂëÂÊ=5.20000e-03£¬¶ÔÓ¦µÄÊä³öÎóÂëÂÊ=8.99434e-09
µ±Ç°ÊäÈëÎóÂëÂÊ=5.30000e-03£¬¶ÔÓ¦µÄÊä³öÎóÂëÂÊ=1.61481e-08
µ±Ç°ÊäÈëÎóÂëÂÊ=5.40000e-03£¬¶ÔÓ¦µÄÊä³öÎóÂëÂÊ=3.27412e-07
µ±Ç°ÊäÈëÎóÂëÂÊ=5.50000e-03£¬¶ÔÓ¦µÄÊä³öÎóÂëÂÊ=3.49796e-08
µ±Ç°ÊäÈëÎóÂëÂÊ=5.60000e-03£¬¶ÔÓ¦µÄÊä³öÎóÂëÂÊ=2.39048e-11
µ±Ç°ÊäÈëÎóÂëÂÊ=5.70000e-03£¬¶ÔÓ¦µÄÊä³öÎóÂëÂÊ=5.65576e-07
µ±Ç°ÊäÈëÎóÂëÂÊ=5.80000e-03£¬¶ÔÓ¦µÄÊä³öÎóÂëÂÊ=4.71655e-09
µ±Ç°ÊäÈëÎóÂëÂÊ=5.90000e-03£¬¶ÔÓ¦µÄÊä³öÎóÂëÂÊ=3.24017e-07
µ±Ç°ÊäÈëÎóÂëÂÊ=6.00000e-03£¬¶ÔÓ¦µÄÊä³öÎóÂëÂÊ=3.72115e-03
ÕÒµ½µ±Ç°ÊäÈëÎóÂëÂÊÃÅÏÞ=5.90000e-03£¬¶ÔÓ¦µÄÊä³öÎóÂëÂÊ=3.24017e-07

threshold_BER =

  Columns 1 through 5

   0.020700000000000   0.018700000000000   0.016100000000000   0.014100000000000   0.012000000000000
   0.020500000000000   0.018500000000000   0.016200000000000   0.014200000000000   0.012000000000000
   0.019000000000000   0.016900000000000   0.015000000000000   0.013200000000000   0.011300000000000

  Columns 6 through 10

   0.009900000000000   0.007900000000000   0.005800000000000                   0                   0
   0.010000000000000   0.007900000000000   0.005900000000000                   0                   0
   0.009300000000000   0.007400000000000                   0                   0                   0

µ±Ç°Êä³öÂë×ÖµÄÂëÂÊ=0.97000,dv=5,dc=167
µ±Ç°ÊäÈëÎóÂëÂÊ=1.00000e-03£¬¶ÔÓ¦µÄÊä³öÎóÂëÂÊ=6.22553e-08
µ±Ç°ÊäÈëÎóÂëÂÊ=2.00000e-03£¬¶ÔÓ¦µÄÊä³öÎóÂëÂÊ=2.69370e-08
µ±Ç°ÊäÈëÎóÂëÂÊ=3.00000e-03£¬¶ÔÓ¦µÄÊä³öÎóÂëÂÊ=2.28558e-07
µ±Ç°ÊäÈëÎóÂëÂÊ=4.00000e-03£¬¶ÔÓ¦µÄÊä³öÎóÂëÂÊ=1.52126e-07
µ±Ç°ÊäÈëÎóÂëÂÊ=5.00000e-03£¬¶ÔÓ¦µÄÊä³öÎóÂëÂÊ=3.11917e-09
µ±Ç°ÊäÈëÎóÂëÂÊ=6.00000e-03£¬¶ÔÓ¦µÄÊä³öÎóÂëÂÊ=4.84453e-03
ÕÒµ½µ±Ç°ÊäÈëÎóÂëÂÊÃÅÏÞ=5.00000e-03£¬¶ÔÓ¦µÄÊä³öÎóÂëÂÊ=3.11917e-09
µ±Ç°ÊäÈëÎóÂëÂÊ=5.00000e-03£¬¶ÔÓ¦µÄÊä³öÎóÂëÂÊ=3.11917e-09
µ±Ç°ÊäÈëÎóÂëÂÊ=5.10000e-03£¬¶ÔÓ¦µÄÊä³öÎóÂëÂÊ=9.73048e-07
µ±Ç°ÊäÈëÎóÂëÂÊ=5.20000e-03£¬¶ÔÓ¦µÄÊä³öÎóÂëÂÊ=6.58623e-13
µ±Ç°ÊäÈëÎóÂëÂÊ=5.30000e-03£¬¶ÔÓ¦µÄÊä³öÎóÂëÂÊ=1.24905e-09
µ±Ç°ÊäÈëÎóÂëÂÊ=5.40000e-03£¬¶ÔÓ¦µÄÊä³öÎóÂëÂÊ=3.92959e-13
µ±Ç°ÊäÈëÎóÂëÂÊ=5.50000e-03£¬¶ÔÓ¦µÄÊä³öÎóÂëÂÊ=1.29521e-09
µ±Ç°ÊäÈëÎóÂëÂÊ=5.60000e-03£¬¶ÔÓ¦µÄÊä³öÎóÂëÂÊ=3.85348e-03
ÕÒµ½µ±Ç°ÊäÈëÎóÂëÂÊÃÅÏÞ=5.50000e-03£¬¶ÔÓ¦µÄÊä³öÎóÂëÂÊ=1.29521e-09

threshold_BER =

  Columns 1 through 5

   0.020700000000000   0.018700000000000   0.016100000000000   0.014100000000000   0.012000000000000
   0.020500000000000   0.018500000000000   0.016200000000000   0.014200000000000   0.012000000000000
   0.019000000000000   0.016900000000000   0.015000000000000   0.013200000000000   0.011300000000000

  Columns 6 through 10

   0.009900000000000   0.007900000000000   0.005800000000000                   0                   0
   0.010000000000000   0.007900000000000   0.005900000000000                   0                   0
   0.009300000000000   0.007400000000000   0.005500000000000                   0                   0


out_code_rate =

   0.980000000000000

µ±Ç°Êä³öÂë×ÖµÄÂëÂÊ=0.98000,dv=3,dc=150
µ±Ç°ÊäÈëÎóÂëÂÊ=1.00000e-03£¬¶ÔÓ¦µÄÊä³öÎóÂëÂÊ=3.34855e-09
µ±Ç°ÊäÈëÎóÂëÂÊ=2.00000e-03£¬¶ÔÓ¦µÄÊä³öÎóÂëÂÊ=8.56021e-08
µ±Ç°ÊäÈëÎóÂëÂÊ=3.00000e-03£¬¶ÔÓ¦µÄÊä³öÎóÂëÂÊ=5.76474e-08
µ±Ç°ÊäÈëÎóÂëÂÊ=4.00000e-03£¬¶ÔÓ¦µÄÊä³öÎóÂëÂÊ=2.21786e-03
ÕÒµ½µ±Ç°ÊäÈëÎóÂëÂÊÃÅÏÞ=3.00000e-03£¬¶ÔÓ¦µÄÊä³öÎóÂëÂÊ=5.76474e-08
µ±Ç°ÊäÈëÎóÂëÂÊ=3.00000e-03£¬¶ÔÓ¦µÄÊä³öÎóÂëÂÊ=5.76474e-08
µ±Ç°ÊäÈëÎóÂëÂÊ=3.10000e-03£¬¶ÔÓ¦µÄÊä³öÎóÂëÂÊ=3.76348e-08
µ±Ç°ÊäÈëÎóÂëÂÊ=3.20000e-03£¬¶ÔÓ¦µÄÊä³öÎóÂëÂÊ=7.29973e-08
µ±Ç°ÊäÈëÎóÂëÂÊ=3.30000e-03£¬¶ÔÓ¦µÄÊä³öÎóÂëÂÊ=4.70576e-07
µ±Ç°ÊäÈëÎóÂëÂÊ=3.40000e-03£¬¶ÔÓ¦µÄÊä³öÎóÂëÂÊ=1.87760e-07
µ±Ç°ÊäÈëÎóÂëÂÊ=3.50000e-03£¬¶ÔÓ¦µÄÊä³öÎóÂëÂÊ=9.17572e-09
µ±Ç°ÊäÈëÎóÂëÂÊ=3.60000e-03£¬¶ÔÓ¦µÄÊä³öÎóÂëÂÊ=4.77159e-07
µ±Ç°ÊäÈëÎóÂëÂÊ=3.70000e-03£¬¶ÔÓ¦µÄÊä³öÎóÂëÂÊ=1.37101e-07
µ±Ç°ÊäÈëÎóÂëÂÊ=3.80000e-03£¬¶ÔÓ¦µÄÊä³öÎóÂëÂÊ=2.03833e-07
µ±Ç°ÊäÈëÎóÂëÂÊ=3.90000e-03£¬¶ÔÓ¦µÄÊä³öÎóÂëÂÊ=1.86856e-03
ÕÒµ½µ±Ç°ÊäÈëÎóÂëÂÊÃÅÏÞ=3.80000e-03£¬¶ÔÓ¦µÄÊä³öÎóÂëÂÊ=2.03833e-07

threshold_BER =

  Columns 1 through 5

   0.020700000000000   0.018700000000000   0.016100000000000   0.014100000000000   0.012000000000000
   0.020500000000000   0.018500000000000   0.016200000000000   0.014200000000000   0.012000000000000
   0.019000000000000   0.016900000000000   0.015000000000000   0.013200000000000   0.011300000000000

  Columns 6 through 10

   0.009900000000000   0.007900000000000   0.005800000000000   0.003800000000000                   0
   0.010000000000000   0.007900000000000   0.005900000000000                   0                   0
   0.009300000000000   0.007400000000000   0.005500000000000                   0                   0

µ±Ç°Êä³öÂë×ÖµÄÂëÂÊ=0.98000,dv=4,dc=200
µ±Ç°ÊäÈëÎóÂëÂÊ=1.00000e-03£¬¶ÔÓ¦µÄÊä³öÎóÂëÂÊ=3.27000e-09
µ±Ç°ÊäÈëÎóÂëÂÊ=2.00000e-03£¬¶ÔÓ¦µÄÊä³öÎóÂëÂÊ=1.38523e-10
µ±Ç°ÊäÈëÎóÂëÂÊ=3.00000e-03£¬¶ÔÓ¦µÄÊä³öÎóÂëÂÊ=4.44399e-08
µ±Ç°ÊäÈëÎóÂëÂÊ=4.00000e-03£¬¶ÔÓ¦µÄÊä³öÎóÂëÂÊ=2.61750e-03
ÕÒµ½µ±Ç°ÊäÈëÎóÂëÂÊÃÅÏÞ=3.00000e-03£¬¶ÔÓ¦µÄÊä³öÎóÂëÂÊ=4.44399e-08
µ±Ç°ÊäÈëÎóÂëÂÊ=3.00000e-03£¬¶ÔÓ¦µÄÊä³öÎóÂëÂÊ=4.44399e-08
µ±Ç°ÊäÈëÎóÂëÂÊ=3.10000e-03£¬¶ÔÓ¦µÄÊä³öÎóÂëÂÊ=6.56853e-10
µ±Ç°ÊäÈëÎóÂëÂÊ=3.20000e-03£¬¶ÔÓ¦µÄÊä³öÎóÂëÂÊ=9.16497e-07
µ±Ç°ÊäÈëÎóÂëÂÊ=3.30000e-03£¬¶ÔÓ¦µÄÊä³öÎóÂëÂÊ=5.60169e-07
µ±Ç°ÊäÈëÎóÂëÂÊ=3.40000e-03£¬¶ÔÓ¦µÄÊä³öÎóÂëÂÊ=7.82443e-11
µ±Ç°ÊäÈëÎóÂëÂÊ=3.50000e-03£¬¶ÔÓ¦µÄÊä³öÎóÂëÂÊ=7.39410e-08
µ±Ç°ÊäÈëÎóÂëÂÊ=3.60000e-03£¬¶ÔÓ¦µÄÊä³öÎóÂëÂÊ=5.16239e-07
µ±Ç°ÊäÈëÎóÂëÂÊ=3.70000e-03£¬¶ÔÓ¦µÄÊä³öÎóÂëÂÊ=3.37511e-08
µ±Ç°ÊäÈëÎóÂëÂÊ=3.80000e-03£¬¶ÔÓ¦µÄÊä³öÎóÂëÂÊ=3.38353e-09
µ±Ç°ÊäÈëÎóÂëÂÊ=3.90000e-03£¬¶ÔÓ¦µÄÊä³öÎóÂëÂÊ=3.26607e-09
µ±Ç°ÊäÈëÎóÂëÂÊ=4.00000e-03£¬¶ÔÓ¦µÄÊä³öÎóÂëÂÊ=2.61750e-03
ÕÒµ½µ±Ç°ÊäÈëÎóÂëÂÊÃÅÏÞ=3.90000e-03£¬¶ÔÓ¦µÄÊä³öÎóÂëÂÊ=3.26607e-09

threshold_BER =

  Columns 1 through 5

   0.020700000000000   0.018700000000000   0.016100000000000   0.014100000000000   0.012000000000000
   0.020500000000000   0.018500000000000   0.016200000000000   0.014200000000000   0.012000000000000
   0.019000000000000   0.016900000000000   0.015000000000000   0.013200000000000   0.011300000000000

  Columns 6 through 10

   0.009900000000000   0.007900000000000   0.005800000000000   0.003800000000000                   0
   0.010000000000000   0.007900000000000   0.005900000000000   0.003900000000000                   0
   0.009300000000000   0.007400000000000   0.005500000000000                   0                   0

µ±Ç°Êä³öÂë×ÖµÄÂëÂÊ=0.98000,dv=5,dc=250
µ±Ç°ÊäÈëÎóÂëÂÊ=1.00000e-03£¬¶ÔÓ¦µÄÊä³öÎóÂëÂÊ=2.66691e-12
µ±Ç°ÊäÈëÎóÂëÂÊ=2.00000e-03£¬¶ÔÓ¦µÄÊä³öÎóÂëÂÊ=2.10560e-07
µ±Ç°ÊäÈëÎóÂëÂÊ=3.00000e-03£¬¶ÔÓ¦µÄÊä³öÎóÂëÂÊ=7.02666e-08
µ±Ç°ÊäÈëÎóÂëÂÊ=4.00000e-03£¬¶ÔÓ¦µÄÊä³öÎóÂëÂÊ=3.24583e-03
ÕÒµ½µ±Ç°ÊäÈëÎóÂëÂÊÃÅÏÞ=3.00000e-03£¬¶ÔÓ¦µÄÊä³öÎóÂëÂÊ=7.02666e-08
µ±Ç°ÊäÈëÎóÂëÂÊ=3.00000e-03£¬¶ÔÓ¦µÄÊä³öÎóÂëÂÊ=7.02666e-08
µ±Ç°ÊäÈëÎóÂëÂÊ=3.10000e-03£¬¶ÔÓ¦µÄÊä³öÎóÂëÂÊ=1.16575e-08
µ±Ç°ÊäÈëÎóÂëÂÊ=3.20000e-03£¬¶ÔÓ¦µÄÊä³öÎóÂëÂÊ=4.55561e-08
µ±Ç°ÊäÈëÎóÂëÂÊ=3.30000e-03£¬¶ÔÓ¦µÄÊä³öÎóÂëÂÊ=1.59770e-11
µ±Ç°ÊäÈëÎóÂëÂÊ=3.40000e-03£¬¶ÔÓ¦µÄÊä³öÎóÂëÂÊ=3.39422e-09
µ±Ç°ÊäÈëÎóÂëÂÊ=3.50000e-03£¬¶ÔÓ¦µÄÊä³öÎóÂëÂÊ=1.03002e-08
µ±Ç°ÊäÈëÎóÂëÂÊ=3.60000e-03£¬¶ÔÓ¦µÄÊä³öÎóÂëÂÊ=7.38321e-08
µ±Ç°ÊäÈëÎóÂëÂÊ=3.70000e-03£¬¶ÔÓ¦µÄÊä³öÎóÂëÂÊ=2.49025e-03
ÕÒµ½µ±Ç°ÊäÈëÎóÂëÂÊÃÅÏÞ=3.60000e-03£¬¶ÔÓ¦µÄÊä³öÎóÂëÂÊ=7.38321e-08

threshold_BER =

  Columns 1 through 5

   0.020700000000000   0.018700000000000   0.016100000000000   0.014100000000000   0.012000000000000
   0.020500000000000   0.018500000000000   0.016200000000000   0.014200000000000   0.012000000000000
   0.019000000000000   0.016900000000000   0.015000000000000   0.013200000000000   0.011300000000000

  Columns 6 through 10

   0.009900000000000   0.007900000000000   0.005800000000000   0.003800000000000                   0
   0.010000000000000   0.007900000000000   0.005900000000000   0.003900000000000                   0
   0.009300000000000   0.007400000000000   0.005500000000000   0.003600000000000                   0


out_code_rate =

   0.990000000000000

µ±Ç°Êä³öÂë×ÖµÄÂëÂÊ=0.99000,dv=3,dc=300
µ±Ç°ÊäÈëÎóÂëÂÊ=1.00000e-03£¬¶ÔÓ¦µÄÊä³öÎóÂëÂÊ=9.21138e-08
µ±Ç°ÊäÈëÎóÂëÂÊ=2.00000e-03£¬¶ÔÓ¦µÄÊä³öÎóÂëÂÊ=1.17188e-03
ÕÒµ½µ±Ç°ÊäÈëÎóÂëÂÊÃÅÏÞ=1.00000e-03£¬¶ÔÓ¦µÄÊä³öÎóÂëÂÊ=9.21138e-08
µ±Ç°ÊäÈëÎóÂëÂÊ=1.00000e-03£¬¶ÔÓ¦µÄÊä³öÎóÂëÂÊ=9.21138e-08
µ±Ç°ÊäÈëÎóÂëÂÊ=1.10000e-03£¬¶ÔÓ¦µÄÊä³öÎóÂëÂÊ=1.64086e-08
µ±Ç°ÊäÈëÎóÂëÂÊ=1.20000e-03£¬¶ÔÓ¦µÄÊä³öÎóÂëÂÊ=7.87563e-07
µ±Ç°ÊäÈëÎóÂëÂÊ=1.30000e-03£¬¶ÔÓ¦µÄÊä³öÎóÂëÂÊ=7.14399e-07
µ±Ç°ÊäÈëÎóÂëÂÊ=1.40000e-03£¬¶ÔÓ¦µÄÊä³öÎóÂëÂÊ=1.96842e-08
µ±Ç°ÊäÈëÎóÂëÂÊ=1.50000e-03£¬¶ÔÓ¦µÄÊä³öÎóÂëÂÊ=4.14676e-07
µ±Ç°ÊäÈëÎóÂëÂÊ=1.60000e-03£¬¶ÔÓ¦µÄÊä³öÎóÂëÂÊ=1.86031e-08
µ±Ç°ÊäÈëÎóÂëÂÊ=1.70000e-03£¬¶ÔÓ¦µÄÊä³öÎóÂëÂÊ=9.63874e-07
µ±Ç°ÊäÈëÎóÂëÂÊ=1.80000e-03£¬¶ÔÓ¦µÄÊä³öÎóÂëÂÊ=4.62573e-07
µ±Ç°ÊäÈëÎóÂëÂÊ=1.90000e-03£¬¶ÔÓ¦µÄÊä³öÎóÂëÂÊ=8.16870e-04
ÕÒµ½µ±Ç°ÊäÈëÎóÂëÂÊÃÅÏÞ=1.80000e-03£¬¶ÔÓ¦µÄÊä³öÎóÂëÂÊ=4.62573e-07

threshold_BER =

  Columns 1 through 5

   0.020700000000000   0.018700000000000   0.016100000000000   0.014100000000000   0.012000000000000
   0.020500000000000   0.018500000000000   0.016200000000000   0.014200000000000   0.012000000000000
   0.019000000000000   0.016900000000000   0.015000000000000   0.013200000000000   0.011300000000000

  Columns 6 through 10

   0.009900000000000   0.007900000000000   0.005800000000000   0.003800000000000   0.001800000000000
   0.010000000000000   0.007900000000000   0.005900000000000   0.003900000000000                   0
   0.009300000000000   0.007400000000000   0.005500000000000   0.003600000000000                   0

µ±Ç°Êä³öÂë×ÖµÄÂëÂÊ=0.99000,dv=4,dc=400
µ±Ç°ÊäÈëÎóÂëÂÊ=1.00000e-03£¬¶ÔÓ¦µÄÊä³öÎóÂëÂÊ=2.17490e-10
µ±Ç°ÊäÈëÎóÂëÂÊ=2.00000e-03£¬¶ÔÓ¦µÄÊä³öÎóÂëÂÊ=1.36041e-03
ÕÒµ½µ±Ç°ÊäÈëÎóÂëÂÊÃÅÏÞ=1.00000e-03£¬¶ÔÓ¦µÄÊä³öÎóÂëÂÊ=2.17490e-10
µ±Ç°ÊäÈëÎóÂëÂÊ=1.00000e-03£¬¶ÔÓ¦µÄÊä³öÎóÂëÂÊ=2.17490e-10
µ±Ç°ÊäÈëÎóÂëÂÊ=1.10000e-03£¬¶ÔÓ¦µÄÊä³öÎóÂëÂÊ=5.38880e-08
µ±Ç°ÊäÈëÎóÂëÂÊ=1.20000e-03£¬¶ÔÓ¦µÄÊä³öÎóÂëÂÊ=4.72362e-10
µ±Ç°ÊäÈëÎóÂëÂÊ=1.30000e-03£¬¶ÔÓ¦µÄÊä³öÎóÂëÂÊ=3.36436e-07
µ±Ç°ÊäÈëÎóÂëÂÊ=1.40000e-03£¬¶ÔÓ¦µÄÊä³öÎóÂëÂÊ=1.03880e-07
µ±Ç°ÊäÈëÎóÂëÂÊ=1.50000e-03£¬¶ÔÓ¦µÄÊä³öÎóÂëÂÊ=2.05134e-07
µ±Ç°ÊäÈëÎóÂëÂÊ=1.60000e-03£¬¶ÔÓ¦µÄÊä³öÎóÂëÂÊ=2.61314e-09
µ±Ç°ÊäÈëÎóÂëÂÊ=1.70000e-03£¬¶ÔÓ¦µÄÊä³öÎóÂëÂÊ=1.02285e-07
µ±Ç°ÊäÈëÎóÂëÂÊ=1.80000e-03£¬¶ÔÓ¦µÄÊä³öÎóÂëÂÊ=4.75932e-09
µ±Ç°ÊäÈëÎóÂëÂÊ=1.90000e-03£¬¶ÔÓ¦µÄÊä³öÎóÂëÂÊ=9.40007e-07
µ±Ç°ÊäÈëÎóÂëÂÊ=2.00000e-03£¬¶ÔÓ¦µÄÊä³öÎóÂëÂÊ=1.36041e-03
ÕÒµ½µ±Ç°ÊäÈëÎóÂëÂÊÃÅÏÞ=1.90000e-03£¬¶ÔÓ¦µÄÊä³öÎóÂëÂÊ=9.40007e-07

threshold_BER =

  Columns 1 through 5

   0.020700000000000   0.018700000000000   0.016100000000000   0.014100000000000   0.012000000000000
   0.020500000000000   0.018500000000000   0.016200000000000   0.014200000000000   0.012000000000000
   0.019000000000000   0.016900000000000   0.015000000000000   0.013200000000000   0.011300000000000

  Columns 6 through 10

   0.009900000000000   0.007900000000000   0.005800000000000   0.003800000000000   0.001800000000000
   0.010000000000000   0.007900000000000   0.005900000000000   0.003900000000000   0.001900000000000
   0.009300000000000   0.007400000000000   0.005500000000000   0.003600000000000                   0

µ±Ç°Êä³öÂë×ÖµÄÂëÂÊ=0.99000,dv=5,dc=500
µ±Ç°ÊäÈëÎóÂëÂÊ=1.00000e-03£¬¶ÔÓ¦µÄÊä³öÎóÂëÂÊ=1.83893e-07
µ±Ç°ÊäÈëÎóÂëÂÊ=2.00000e-03£¬¶ÔÓ¦µÄÊä³öÎóÂëÂÊ=1.63958e-03
ÕÒµ½µ±Ç°ÊäÈëÎóÂëÂÊÃÅÏÞ=1.00000e-03£¬¶ÔÓ¦µÄÊä³öÎóÂëÂÊ=1.83893e-07
µ±Ç°ÊäÈëÎóÂëÂÊ=1.00000e-03£¬¶ÔÓ¦µÄÊä³öÎóÂëÂÊ=1.83893e-07
µ±Ç°ÊäÈëÎóÂëÂÊ=1.10000e-03£¬¶ÔÓ¦µÄÊä³öÎóÂëÂÊ=2.14247e-10
µ±Ç°ÊäÈëÎóÂëÂÊ=1.20000e-03£¬¶ÔÓ¦µÄÊä³öÎóÂëÂÊ=3.45412e-07
µ±Ç°ÊäÈëÎóÂëÂÊ=1.30000e-03£¬¶ÔÓ¦µÄÊä³öÎóÂëÂÊ=2.30224e-08
µ±Ç°ÊäÈëÎóÂëÂÊ=1.40000e-03£¬¶ÔÓ¦µÄÊä³öÎóÂëÂÊ=1.38639e-08
µ±Ç°ÊäÈëÎóÂëÂÊ=1.50000e-03£¬¶ÔÓ¦µÄÊä³öÎóÂëÂÊ=4.84716e-07
µ±Ç°ÊäÈëÎóÂëÂÊ=1.60000e-03£¬¶ÔÓ¦µÄÊä³öÎóÂëÂÊ=4.37926e-12
µ±Ç°ÊäÈëÎóÂëÂÊ=1.70000e-03£¬¶ÔÓ¦µÄÊä³öÎóÂëÂÊ=2.70767e-08
µ±Ç°ÊäÈëÎóÂëÂÊ=1.80000e-03£¬¶ÔÓ¦µÄÊä³öÎóÂëÂÊ=9.68094e-11
µ±Ç°ÊäÈëÎóÂëÂÊ=1.90000e-03£¬¶ÔÓ¦µÄÊä³öÎóÂëÂÊ=1.43823e-03
ÕÒµ½µ±Ç°ÊäÈëÎóÂëÂÊÃÅÏÞ=1.80000e-03£¬¶ÔÓ¦µÄÊä³öÎóÂëÂÊ=9.68094e-11

threshold_BER =

  Columns 1 through 5

   0.020700000000000   0.018700000000000   0.016100000000000   0.014100000000000   0.012000000000000
   0.020500000000000   0.018500000000000   0.016200000000000   0.014200000000000   0.012000000000000
   0.019000000000000   0.016900000000000   0.015000000000000   0.013200000000000   0.011300000000000

  Columns 6 through 10

   0.009900000000000   0.007900000000000   0.005800000000000   0.003800000000000   0.001800000000000
   0.010000000000000   0.007900000000000   0.005900000000000   0.003900000000000   0.001900000000000
   0.009300000000000   0.007400000000000   0.005500000000000   0.003600000000000   0.001800000000000

Elapsed time is 38110.154961 seconds.
