# Supplementary material for: An Efficient Design of Systematic Rateless Codes
Source: Hindawi journal article supplement (doi:10.1155/2020/8068414), 2020-05-19
Supplement: f1 [file 8068414.f1.zip › supplementary files/Matlab_code_for_Figure1/BER_by_DDE/DDE_algo_main_find_crit_BER_of_out_code.m]

% 2018092   Ñ°ÕÒÍâÂë£¨¸ßÂëÂÊldpcÂë£©ÔÚ²»Í¬ÂëÂÊºÍ¶ÈÊýÏÂµÄ¹Ø¼üÎóÂëÂÊ
clc;
clear;
diary off;
format long;

rec_file='Critical_BER_by_DDE_rate_090_099_dv3_5.txt';    % ¼ÇÂ¼¹ý³ÌºÍ½á¹ûÎÄ¼þ
if  exist(rec_file,'file')
    delete(rec_file);
end
diary(rec_file);
tic;


out_code_rate_vec=[0.90:0.01:0.99];
dv_vec=[3 4 5]';
threshold_BER=zeros(length(dv_vec),length(out_code_rate_vec));

initial_BER=0.001; % ÉèÖÃÉÔÎ¢Ð¡Ò»µã
initial_delta_BER=0.001;  % ²½²î


%%%%% ÐÅµÀ²ÎÊýÉèÖÃ   %%%%

delta=0.05;  %Á¿»¯¼ä¸ô
v_max=25;       % ·¶Î§²»ÄÜÌ«Ð¡£¬ÒòÎªµü´úºópvµÄ·Ö²¼»áÏò½Ï´óµÄvÖµ£¨Èç40-50£©¡°ÒÆ¶¯¡±£¬Ì«Ð¡µÄ»°»á¡°¸²¸Ç¡±²»È«
v_min=-25;
v_range=[v_min delta v_max];
v=[v_min:delta:v_max];
% load lookup_table_v__20_005_60;  % ÏàÓ¦µÄ²éÕÒ±í
[ii_vec,jj_vec,startpoint_vec,endpoint_vec,ij_length_dist]=Gene_Lookup_Table_for_ChNode_update(v_range);


for jj=1:length(out_code_rate_vec)
    out_code_rate=out_code_rate_vec(jj)
    for ii=1:length(dv_vec)
        dv=dv_vec(ii);
        
dc=round(dv/(1-out_code_rate));
fprintf('µ±Ç°Êä³öÂë×ÖµÄÂëÂÊ=%2.5f,dv=%d,dc=%d\n',out_code_rate,dv,dc);

current_BER=initial_BER;
delta_BER=initial_delta_BER;
keep_search=1;
search_times=0;
while keep_search
    search_times=search_times+1;
inter_m=2*(qfuncinv(current_BER))^2;
inter_sig2=2*inter_m;
gaussian_message=1/sqrt(2*pi*inter_sig2)*exp(-(v-inter_m).^2/(2*inter_sig2));
if sum(gaussian_message)<=1/delta
   gaussian_message(end)=1/delta-sum(gaussian_message(1:end-1));
else
   gaussian_message=gaussian_message/sum(gaussian_message)/delta; 
end
pv_output_g=gaussian_message;

qv_init=pv_output_g;   % ¡°³¬ÐÅµÀ¡±Êä³öµÄ³õÊ¼ÏûÏ¢
qv=qv_init;
outer_code_ber_g=[];
outer_iter_max=200;
for iter_index=1:outer_iter_max
   %%%%%%  Ð£Ñé½ÚµãµÄPMF×ª»»  %%%%%
        temp_qu=[zeros(1,length(v));qv;zeros(dc-2,length(v))];    
        for ii_index=3:dc     % À´Ô´±ßÓÐ2ÖÁdc-1¸ö²»È·¶¨ÏûÏ¢Ê±µÄÊä³öÏûÏ¢£¬Ã¿´ÎÑ­»·ÄÜ¼ÆËãÒ»ÖÖÇé¿ö£¬¶ÔÓ¦ÓÚtemp_puÖÐµÄÒ»ÐÐ
            temp_qu(ii_index,:)=ChNode_R2_first_fun(ii_vec,jj_vec,startpoint_vec,ij_length_dist,temp_qu(ii_index-1,:),qv,delta);
        end
        qu=temp_qu(dc,:);
   %%%%%% ±äÁ¿½ÚµãµÄPMF×ª»» %%%%%%%%%
    temp_qv=zeros(dv,length(v));    % ×î¶àÓÐdvÖÖ¶ÈÊý£¬ÆäÖÐÇÒ¿Ï¶¨Ã»ÓÐ¶ÈÊýÎª1µÄ½Úµã
    for ii_index=2:dv
        temp_qv(ii_index,:)=VarNode_conv(qv_init,qu,ii_index,v,delta);
    end
    qv=temp_qv(dv,:);
    qv=qv/sum(qv)/delta;      
    
    outer_code_ber_g(iter_index)=(sum(qv(1:abs(v_min/delta)))+0.5*qv(abs(v_min/delta)+1))*delta;
    if outer_code_ber_g(iter_index)<1e-6
       fprintf('µ±Ç°ÊäÈëÎóÂëÂÊ=%2.5e£¬¶ÔÓ¦µÄÊä³öÎóÂëÂÊ=%2.5e\n',current_BER,outer_code_ber_g(iter_index))
       thres_BER=current_BER;
       thres_BER_out=outer_code_ber_g(iter_index);
       current_BER=current_BER+delta_BER;
       break;  
    elseif  iter_index==outer_iter_max
       fprintf('µ±Ç°ÊäÈëÎóÂëÂÊ=%2.5e£¬¶ÔÓ¦µÄÊä³öÎóÂëÂÊ=%2.5e\n',current_BER,outer_code_ber_g(iter_index))
       fprintf('ÕÒµ½µ±Ç°ÊäÈëÎóÂëÂÊÃÅÏÞ=%2.5e£¬¶ÔÓ¦µÄÊä³öÎóÂëÂÊ=%2.5e\n',thres_BER,thres_BER_out)
       current_BER=thres_BER;
       delta_BER=delta_BER/10; % »»Ò»¸öÁ¿¼¶µÄÎóÂëÂÊ¼ÌÐø
       if abs(delta_BER-1e-5)<1e-7
           keep_search=0;
       end
    end
    
end    %for iter_index=1:outer_iter_max
    

end   % while keep_search
    threshold_BER(ii,jj)=thres_BER
    end % jj
end % ii


toc;
diary off;
