# Supplementary material for: An Efficient Design of Systematic Rateless Codes
Source: Hindawi journal article supplement (doi:10.1155/2020/8068414), 2020-05-19
Supplement: f1 [file 8068414.f1.zip › supplementary files/Matlab_code_for_Figure1/BER_by_DDE/DDE_algo_main_fixed_EsN0.m]

% 20180927 ¹Ì¶¨·ûºÅÐÅÔë±È£¬ÂëÂÊ½øÐÐ¸Ä±ä£¬¿ÉÒÔÑ¡ÔñÏµÍ³Âë»ò·ÇÏµÍ³RaptorÂë 

clc;
clear;
diary off;
format long;

rec_file='BER_by_DDE_awgn_sigma_n_977_dist2016.977_s.txt';    % ¼ÇÂ¼¹ý³ÌºÍ½á¹ûÎÄ¼þ
if  exist(rec_file,'file')
    delete(rec_file);
end
diary(rec_file);
tic;

%%%%% ÐÅµÀ²ÎÊýÉèÖÃ   %%%%
channel_mode=2;  %ÐÅµÀÄ£Ê½ 1:BECÐÅµÀ,2£ºBEC_AWGNÐÅµÀ,3¡¢ÈðÀûË¥ÂäÐÅµÀ,4¡¢NakagamiÐÅµÀ£¬5¡¢ÀµË¹ÐÅµÀ
if channel_mode==2
    fprintf('ÐÅµÀÎªAWGNÐÅµÀ\n');
elseif channel_mode==3
    Rician_Gamma=0;
    fprintf('µ±Ç°ÐÅµÀÎªÈðÀûÐÅµÀ\n');
elseif channel_mode==4
    Naka_m=2;             %  Nakagami²ÎÊý
    fprintf('µ±Ç°ÐÅµÀÎªNakagamiÐÅµÀ£¬²ÎÊým=%d\n',Naka_m);
elseif channel_mode==5
    Rician_Gamma=2;  % Rician Òò×Ó
    fprintf('µ±Ç°ÐÅµÀÎªÀµË¹ÐÅµÀ£¬²ÎÊýgamma=%d\n',Rician_Gamma);
end

code_type=1; % 0: ·ÇÏµÍ³Âë£¬1£º ÏµÍ³Âë
overhead_vec=[1:0.05:2]
inner_code_rate=1./(overhead_vec+code_type)  % ÄÚÂëÂëÂÊ   
outer_code_rate=0.98;  % ÍâÂëÂëÂÊ
code_rate_vec=outer_code_rate*inner_code_rate
% if code_type==0
%   overhead=1/inner_code_rate;  % ·ÇÏµÍ³LTÂë
% else
%   overhead=1/inner_code_rate-1;  % ÏµÍ³LTÂë
% end

sigma2=0.977^2
sigma_0=sqrt(sigma2);
EsN0indB=10*log10(1/(2*sigma2))
EbN0indB_vec=10*log10(1./(2*code_rate_vec*sigma2))
% EbN0indB_vec=[0:0.1:6]        % ¿¼²ìµÄÐÅÔë±È·¶Î§

sel_raptor_LT=0; % 0: LTÂë£¬1£ºRaptorÂë

distr_num=2016.977

%%%%% Ëã·¨²ÎÊýÉèÖÃ   %%%%
iter_max=200; % Ëã·¨ÖÐÃ¿¸öÐÅ¸É±ÈÏÂµÄ×î´óµü´ú´ÎÊý
pe_target=1*10^-6; % Ä¿±êÎóÂëÂÊ£¬µü´úÖÐÐ¡ÓÚËü¼´½áÊø·ÂÕæ
pe_target_innercode=1*10^-4; % ÄÚÂëÄ¿±êÎóÂëÂÊ

delta=0.05;  %Á¿»¯¼ä¸ô
v_max=25;       % ·¶Î§²»ÄÜÌ«Ð¡£¬ÒòÎªµü´úºópvµÄ·Ö²¼»áÏò½Ï´óµÄvÖµ£¨Èç40-50£©¡°ÒÆ¶¯¡±£¬Ì«Ð¡µÄ»°»á¡°¸²¸Ç¡±²»È«
v_min=-25;
v_range=[v_min delta v_max];
v=[v_min:delta:v_max];
% load lookup_table_v__20_005_60;  % ÏàÓ¦µÄ²éÕÒ±í
[ii_vec,jj_vec,startpoint_vec,endpoint_vec,ij_length_dist]=Gene_Lookup_Table_for_ChNode_update(v_range);

a_delta=0.01;
a_vec=[a_delta:a_delta:20];                                      % Ë¥ÂäÏµÊý²ÉÑùÖµ
[vv,aa]=meshgrid(v,a_vec);


%%%%%   ÍâÂë£»ÄÚÂëÊä³ö½Úµã¶È·Ö²¼Ñ¡Ôñ  %%%%%%%%%%%%%
dv=4;dc=round(dv/(1-outer_code_rate));    % ÍâÂë£¨¹æÔòLDPCÂë£©¶ÈÊý
flag_outdecoding=1;     % ¿ØÖÆÍâÂëÔÚ´ïµ½ÎóÂëÂÊºó²»ÔÙ½øÐÐÍâÂëÒëÂë£¬»òÕßÖ»ÓÐLTÂë£¬²»½øÐÐÍâÂëÑ­»·
if sel_raptor_LT==0
   outer_code_rate=1;   % ÍâÂëÂëÂÊ
   flag_outdecoding=0;
end

% inner_code_rate=code_rate/outer_code_rate;  % LTÂëÂëÂÊ
if sel_raptor_LT==0
    fprintf('µ±Ç°Ñ¡ÔñLTÂë\n');
else
    fprintf('µ±Ç°Ñ¡ÔñRaptorÂë\n');
end
if code_type==0
  fprintf('µ±Ç°Ñ¡Ôñ·ÇÏµÍ³Âë\n');
else 
  fprintf('µ±Ç°Ñ¡ÔñÏµÍ³Âë\n');
end
% fprintf('×ÜÂëÂÊ=%2.5f, ÍâÂëÂëÂÊ=%2.5f, ÄÚÂëÂëÂÊ=%2.5f\n',code_rate,outer_code_rate,inner_code_rate);

switch distr_num
    case 2019.298  % ²âÊÔ£¬sigma_n_2=0.977^2; alpha_star=10; beta=9.613244502733293;  design_OH= 1.040231526115532;     Pe_target=3.9e-2;  D=100
        out_node_index=[    6     7    38    39]; 
        out_node_degree(out_node_index)=[  0.846815465372582   0.045038486769935   0.000613563333579   0.107532484523904]
   case 2016.977
       out_node_index=[1:20 200];   
       out_node_degree(out_node_index)=[0.0044 0.0046 0.0055 0.0048 0.3327 0.4143 0.0875 0.0758 0.0059 0.005 0.0054 0.0059 0.0047 0.0034 0.0026 0.0012 0.001 0.0008 0.0006 0.0003 0.0332];    
    case 2019  % ²âÊÔ£¬rho=0.7; sigma_2=0.9786^2/rho;  sigma_n_2=0.05^2; alpha_star=10; design_OH= 1.797837808421577;     Pe_target=3e-3;  D=50
        out_node_index=[ 5     6    30    31 ]; 
        out_node_degree(out_node_index)=[0.143739573921700   0.728784661257046   0.124207861387834   0.003267903433419];
     case 2016     % 16Äêsigma=1µÄ
       out_node_index=[1:18 200];   
       out_node_degree(out_node_index)=[0.0036 0.0061 0.0106 0.0226 0.1337 0.6927 0.0024 0.0607 0.0097 0.0128 0.0049 0.0028 0.0013 0.0011 0.0009 0.0007 0.0005 0.0003 0.0326];
    case 2006.2     % AWGNÐÅµÀÏÂµÄÓÅ»¯½á¹û  2006Äê
       out_node_index=[1 2 3 4 5 8 14 30 33 200]; 
       out_node_degree(out_node_index)=[0.006 0.492 0.0339 0.2403 0.006 0.095 0.049 0.018 0.0356 0.033];
    case 0
         out_node_index=[1 2 3 4 5 8 9 19 65 66]   %  BECÐÅµÀ·ÇÏµÍ³ÂëÓÅ»¯½á¹û
         out_node_degree(out_node_index)=[0.007969 0.493570 0.166220 0.072646 0.082558 0.056058 0.037229 0.055590 0.025023 0.003135];
         out_node_degree(out_node_index)
    case 1                    % DDEÏÂawgnÐÅµÀ·ÇÏµÍ³ÂëÓÅ»¯½á¹û
%          out_node_index=[1 2 3 4 5 11 40] 
%          out_node_degree(out_node_index)=[0.00967 0.45025 0.20937 0.02332 0.14735 0.112249 0.04755];
         out_node_index=[1 2 3 4 5 8 14 30 33 200]; 
         out_node_degree(out_node_index)=[0.006 0.492 0.0339 0.2403 0.006 0.095 0.049 0.018 0.0356 0.033]; 
         out_node_degree(out_node_index)
    case 2
         out_node_index=[1 2 3 8 9 60]   % DDEÏÂawgnÐÅµÀÏµÍ³ÂëÓÅ»¯½á¹û
         out_node_degree(out_node_index)=[0.00477 0.26101 0.09240 0.06913 0.51223 0.06046];
         out_node_degree(out_node_index)
    case 4
        out_node_index=[1 2 3 4 5 10 40]   % ÔÝÊ±µÃµ½µÄÓÅ»¯½á¹û
        out_node_degree(out_node_index)=[0.00896 0.44293 0.13185 0.21253 0.00602 0.14513 0.05257];
        out_node_degree(out_node_index)
    otherwise
end
% out_node_index=[4 5 31 33 200] 
% out_node_degree(out_node_index)=[0.11337 0.76413 0.03087 0.06638 0.02525];
% out_node_degree(out_node_index)
if abs(1-sum(out_node_degree))>1e-2
    error('Êä³ö½Úµã¶È·Ö²¼Ö®ºÍÎª%2.5f£¬Çëµ÷Õû',sum(out_node_degree))
end
beta=out_node_index*out_node_degree(out_node_index)';
out_edge_degree=degree_node_to_edge(out_node_degree);
ch_degree=out_edge_degree;
ch_index=out_node_index;
dr=ch_index(end);

%%%%% Âë×Ö²ÎÊýÉèÖÃ   %%%%

inner_code_BER=zeros(1,length(code_rate_vec));
outer_code_BER=zeros(1,length(code_rate_vec));
for code_rate_index=1:length(code_rate_vec)

code_rate=code_rate_vec(code_rate_index);     % ×ÜÂëÂÊ


% if code_type==0
%   overhead=1/inner_code_rate;  % ·ÇÏµÍ³LTÂë
% else
%   overhead=1/inner_code_rate-1;  % ÏµÍ³LTÂë
% end
overhead=overhead_vec(code_rate_index);
alpha=beta*overhead;   % ÊäÈë£¨±äÁ¿£©½ÚµãÆ½¾ù¶ÈÊý£¬Ò²ÊÇ²´ËÉ²ÎÊý
in_node_index=1:round(alpha*3);                 % ÊäÈë½Úµã¶ÈÊý·¶Î§£¨ËäÈ»ÀíÂÛÉÏÊÇÕýÎÞÇî´ó£¬µ«ÐèÒª¸ù¾ÝÆ½¾ù¶ÈÊý½øÐÐ½Ø¶Ï£©
in_node_degree=exp(-alpha)*(alpha.^in_node_index)./gamma(in_node_index+1);   % ÊäÈë½ÚµãµÄ¶È·Ö²¼
in_node_degree(1)=in_node_degree(1)+exp(-alpha);    % °ÑÊäÈë½Úµã¶ÈÊýÎª0µÄ¸ÅÂÊ¼Óµ½¶ÈÊýÎª1µÄ¸ÅÂÊÉÏ£¨±ÜÃâÂë³¤½Ï¶ÌÊ±¶ÈÊýÎª0µÄ¸ÅÂÊ¹ý´ó£©
if abs(1-sum(in_node_degree))>1e-2
    error('ÊäÈë½Úµã¶È·Ö²¼Ö®ºÍÎª%2.5f\n,Çëµ÷Õû',sum(in_node_degree))
end
in_edge_degree=degree_node_to_edge(in_node_degree);
var_degree=in_edge_degree;
var_node_degree=in_node_degree;
var_index=in_node_index;
dl=var_index(end);

% hold on;plot(var_degree);
% ÕâÊÇÍ¨¹ý¶þÏî·Ö²¼µÃµ½µÄLTÂë¶È·Ö²¼£¬ºÍ²´ËÉ·Ö²¼µÄ½üËÆ£¬µ«²»ÍêÈ«Ò»Ñù£¬¶Ô×îºóµÄ½á¹ûÓÐÇáÎ¢µÄÓ°Ïì£¬¿ÉºöÂÔ
% k=100
% k1=round(k/outer_code_rate);
% % n=k/code_rate
% n=round(k1*overhead)
% var_node_degree=zeros(1,length(in_edge_degree));
% for ii=1:length(var_node_degree)
%     var_node_degree(ii)=nchoosek(n,ii)*(beta/k1)^ii*(1-beta/k1)^(n-ii);
% end
% var_degree=degree_node_to_edge(var_node_degree);
% hold on;plot(var_degree);


ber=zeros(length(code_rate_vec),iter_max);   % ¼ÇÂ¼ÄÚÂë²»Í¬ÐÅÔë±ÈÏÂ£¬²»Í¬µü´ú´ÎÊýÊ±µÄÎóÂëÂÊ
% for EbN0_index=1:length(EbN0indB_vec)
%     EbN0indB=EbN0indB_vec(EbN0_index);
%     EbN0=10^(EbN0indB/10);
%     sigma_0=sqrt(1/(2*code_rate*EbN0));


%%% ÄÚÂëÐ£Ñé½ÚµãµÄ³õÊ¼·Ö²¼pu_init  %%%
     switch channel_mode
         case 2
             pu_init=sigma_0/sqrt(8*pi)*exp(-(2-sigma_0^2*v).^2/8/sigma_0^2);
         case 3
             r_gamma=Rician_Gamma;
             pu_init_mat=sigma_0/sqrt(2*pi)*exp(-(vv-2*aa.^2/sigma_0^2).^2./(8*aa.^2/sigma_0^2))*(1+r_gamma).*exp(-aa.^2*(1+r_gamma)-r_gamma).*besseli(0,2*aa*sqrt(r_gamma*(1+r_gamma)));
             pu_init=sum(pu_init_mat,1)*a_delta;
         case 4
             syms b;
             m=Naka_m;
             sigma=sigma_0;
%              f1=sigma/(sqrt(2*b)*(1+sigma*sqrt(2*b)));
             f1=sigma/(2*sqrt(2*b))*exp(v/2-sigma*abs(v)*sqrt(b)/sqrt(2));
             df1=diff(f1,m-1);
             diff_item=subs(df1,b,1/2/sigma^2+m);
%              Pe0=m^m*(-1)^(m-1)/prod(1:m-1)*diff_item;
             pu_init=double(m^m*(-1)^(m-1)/prod(1:m-1)*diff_item);
         case 5
             r_gamma=Rician_Gamma;
             pu_init_mat=sigma_0/sqrt(2*pi)*exp(-(vv-2*aa.^2/sigma_0^2).^2./(8*aa.^2/sigma_0^2))*(1+r_gamma).*exp(-aa.^2*(1+r_gamma)-r_gamma).*besseli(0,2*aa*sqrt(r_gamma*(1+r_gamma)));
             pu_init=sum(pu_init_mat,1)*a_delta;
     end
     pu_init(end)=1/delta-sum(pu_init(1:end-1));

if abs(sum(pu_init)*delta-1)>0.001    %%% Èç¹û³¬³öµ±Ç°²ÉÑù·¶Î§Ôò±¨´í
    fprintf('±»¸ÉÈÅÏûÏ¢·Ö²¼·¶Î§¹ýÐ¡£¬ÐèÒªµ÷Õû£¬µ±Ç°ÐÅÔë±È±È=%2.2fdB£¬ÂëÂÊ=%2.2f \n£¬',EbN0indB,code_rate);
end
%%%%%%%%%%%%%%%%%%%%%%%%%%%%%%%%%%%%%%%%%%
%%%  µü´úÇ°µÄ³õÊ¼»¯   %%%
    if code_type==0
       pv_init=[zeros(1,(length(v)-1)/2) 1/delta zeros(1,(length(v)-1)/2)];    % ·ÇÏµÍ³Âë£¬±äÁ¿½ÚµãÃ»ÓÐÐÅµÀ½ÚµãÊäÈë£¬»òÕßËµÎª0Öµ
    else
       pv_init=pu_init;    % ¶ÔÓÚÏµÍ³ÂëÀ´Ëµ£¬±äÁ¿½ÚµãÓÐÐÅµÀ½ÚµãµÄÊäÈë
    end
pv=pv_init;   % ³õÊ¼»¯pv
%%% ½øÐÐµü´ú %%%
for iter_index=1:iter_max    
    %%%%%%%%  Ð£Ñé½ÚµãµÄPMF×ª»»  %%%%%%%%
        temp_pu=[pu_init;zeros(dr-1,length(v))];    % ×î¶àÓÐdrÖÖ¶ÈÊý£¬²ÎÓëÐ£Ñé½ÚµãÀ´Ô´ÏûÏ¢×î¶àdr-1¸ö£¬ÐèÒªµÄRÔËËãÎªdr-2´Î£¬¶ÈÊýÎª1µÄ½ÚµãÃ»ÓÐÊä³ö£¬¶ÈÊýÎª2µÄ½ÚµãÊä³ö¾ÍÊÇpu_init
        for ii_index=2:dr     % À´Ô´±ßÓÐ1ÖÁdr-1¸ö²»È·¶¨ÏûÏ¢Ê±µÄÊä³öÏûÏ¢£¬Ã¿´ÎÑ­»·ÄÜ¼ÆËãÒ»ÖÖÇé¿ö£¬¶ÔÓ¦ÓÚtemp_puÖÐµÄÒ»ÐÐ
            temp_pu(ii_index,:)=ChNode_R2_first_fun(ii_vec,jj_vec,startpoint_vec,ij_length_dist,temp_pu(ii_index-1,:),pv,delta);
        end
        pu=ch_degree*temp_pu;

    %%%%%%   ±äÁ¿½ÚµãµÄPMF×ª»» %%%%%%%%%
    temp_pv=zeros(dl,length(v));    % ÓÐdlÖÖ¿ÉÄÜ¶ÈÊý£¬²»¿¼ÂÇ¶ÈÊýÎª0µÄÇé¿ö£¨Ç°ÃæÉú³ÉÊ±ÒÑ°Ñ¸ÃÇé¿öµÄ¸ÅÂÊ¼Óµ½ÁË¶ÈÊýÎª1ÉÏ£©
    temp_pv(1,:)=pv_init;
%     temp_pv(2,:)=pu;                % ¶ÈÊýÎª2Ê±
    for ii_index=2:dl
        temp_pv(ii_index,:)=VarNode_conv(pv_init,pu,ii_index,v,delta)/delta;
    end
    pv=var_degree*temp_pv;
    pv=pv/sum(pv)/delta;
%     ber(EbN0_index,iter_index)=(sum(pv(1:abs(v_min/delta)))+0.5*pv(abs(v_min/delta)+1))*delta;

    temp_pv_output=[temp_pv(2:end,:);VarNode_conv(pv_init,pu,dl+1,v,delta)/delta];   % ¶ÈÊýÎªdvµÄÒª¾í»ýdv-1´Î
    pv_output=var_node_degree*temp_pv_output;
    pv_output=pv_output/sum(pv_output)/delta;
    ber(code_rate_index,iter_index)=(sum(pv_output(1:abs(v_min/delta)))+0.5*pv_output(abs(v_min/delta)+1))*delta;
    
    if iter_index>10
        if abs(ber(code_rate_index,iter_index)-ber(code_rate_index,iter_index-1))<1e-8
            break;
        end
    end

end    % for iter_index=1:iter_max  

inner_code_BER(code_rate_index)=ber(code_rate_index,iter_index)
% if inner_code_BER(code_rate_index)<pe_target_innercode
%    fprintf('µ±Ç°ÄÚÂëÎóÂëÂÊÒÑµÍÓÚÄ¿±êÎóÂëÂÊ\n')
%    break;   % Í£Ö¹µü´ú£¬ÖÕÖ¹³ÌÐò
% end 
%%%%%%%%%% outer code  DDE %%%%%%
if flag_outdecoding==1
qv_init=pv_output;   % ¡°³¬ÐÅµÀ¡±Êä³öµÄ³õÊ¼ÏûÏ¢
qv=qv_init;
outer_code_ber=[];
outer_iter_max=100;
for iter_index=1:outer_iter_max
   %%%%%%  Ð£Ñé½ÚµãµÄPMF×ª»»  %%%%%
        temp_qu=[zeros(1,length(v));qv;zeros(dc-2,length(v))];    
        for ii_index=3:dc     % À´Ô´±ßÓÐ2ÖÁdc-1¸ö²»È·¶¨ÏûÏ¢Ê±µÄÊä³öÏûÏ¢£¬Ã¿´ÎÑ­»·ÄÜ¼ÆËãÒ»ÖÖÇé¿ö£¬¶ÔÓ¦ÓÚtemp_puÖÐµÄÒ»ÐÐ
            temp_qu(ii_index,:)=ChNode_R2_first_fun(ii_vec,jj_vec,startpoint_vec,ij_length_dist,temp_qu(ii_index-1,:),qv,delta);
        end
        qu=temp_qu(dc,:);
   %%%%%% ±äÁ¿½ÚµãµÄPMF×ª»» %%%%%%%%%
    temp_qv=zeros(dv,length(v));    % ×î¶àÓÐdvÖÖ¶ÈÊý£¬ÆäÖÐÇÒ¿Ï¶¨Ã»ÓÐ¶ÈÊýÎª1µÄ½Úµã
    for ii_index=2:dv
        temp_qv(ii_index,:)=VarNode_conv(qv_init,qu,ii_index,v,delta);
    end
    qv=temp_qv(dv,:);
    qv=qv/sum(qv)/delta;      
    
    outer_code_ber(iter_index)=(sum(qv(1:abs(v_min/delta)))+0.5*qv(abs(v_min/delta)+1))*delta;
    if outer_code_ber(iter_index)<1e-6
        break;
    end
    
    if iter_index>10
        if abs(outer_code_ber(iter_index)-outer_code_ber(iter_index-1))>1e-8
            break;
        end
    end
end    %for iter_index=1:inner_iter_max

    outer_code_BER(code_rate_index)=outer_code_ber(iter_index)
    
    if outer_code_BER(code_rate_index)<pe_target
        flag_outdecoding=0;
        fprintf('µ±Ç°ÍâÂëÎóÂëÂÊÒÑµÍÓÚÄ¿±êÎóÂëÂÊ£¬×ÜÂëÂÊÎª%2.2f \n',code_rate_vec(code_rate_index))
    end
end   % if flag_outdecoding==1
%    if flag_outdecoding==0   % Èç¹û´ïµ½ÎóÂëÂÊ²»ÔÙ¼ÌÐøÔö¼ÓÐÅµÀ²ÎÁ¿
%          break;
%      end
end    % for code_rate_index=1:length(code_rate_index)
    
semilogy(overhead_vec,[inner_code_BER;outer_code_BER]);grid on;
toc;
diary off;
