# Supplementary material for: An Efficient Design of Systematic Rateless Codes
Source: Hindawi journal article supplement (doi:10.1155/2020/8068414), 2020-05-19
Supplement: f1 [file 8068414.f1.zip › supplementary files/Matlab_code_for_Figure1/BER_by_DDE/degree_edge_to_node.m]

function node_degree=degree_edge_to_node(edge_degree)
% 2018042125  »ùÓÚÒò×ÓÍ¼µÄÂë×Ö£¬±ß¶È·Ö²¼×ª»»Îª½Úµã¶È·Ö²¼
% ¹«Ê½¡¶ÐÅµÀ±àÂë£º¾­µäÓëÏÖ´ú¡·£¬p174£¬£¨5.7£©Óë£¨5.8£©
% ii_vec=1:length(edge_degree);
%%%%  ÊäÈëÎª±ßµÄ¶È·Ö²¼£¬³¤¶ÈµÈÓÚ×î´óµÄ¶ÈÊý£¨¼´ÆäÖÐ¿ÉÄÜ´æÔÚ·Ö²¼Îª0µÄ¶È·Ö²¼£©£¬Êä³öÎª½ÚµãµÄ¶È·Ö²¼£¬³¤¶ÈºÍÊäÈëµÄÒ»ÖÂ¡£
ii_vec=find(edge_degree~=0);       % ¶ÈÊýË÷Òý
node_degree(ii_vec)=edge_degree(ii_vec)./ii_vec/sum(edge_degree(ii_vec)./ii_vec);
