# Supplementary material for: An Efficient Design of Systematic Rateless Codes
Source: Hindawi journal article supplement (doi:10.1155/2020/8068414), 2020-05-19
Supplement: f1 [file 8068414.f1.zip › supplementary files/Matlab_code_for_Figure1/BER_by_DDE/Diff_evol_main.asv]

%%%%%%%%%  20170125 ²î·Ö½ø»¯ËÑË÷¶È·Ö²¼  %%%%%%%
clc;
clear;
diary off;
rec_file='Rate05_dn4_EbN0_10dB_BPSK_AWGN_rho1.txt';    % ¼ÇÂ¼¹ý³ÌºÍ½á¹ûÎÄ¼þ
if  exist(rec_file,'file')
    delete(rec_file);
end;
diary(rec_file);
tic;
%%%% Âë×Ö²ÎÊýÉèÖÃ %%%%%%%%%%%%%%%%%%%%%%%%%%%%
R=1/2;  %ÂëÂÊ
K=1-R;
dl=10;  % ±äÁ¿½Úµã×î´ó¶ÈÊý
degree_num=4;   % dlÔ½´ó£¬¿ÉÉèÖÃµÄ·Ç0Öµ¶ÈÊýÔ½¶à£¨¸ù¾ÝÎÄÏ×½á¹ûµÄ¾­ÑéÍÆ²â£©£¬ÆäÖÐ¶ÈÊý2,3ºÍdlÊÇÒ»¶¨ÓÐµÄ¡£
%%%%  ÐÅµÀ²ÎÊýÉèÖÃ  %%%%%%%%%%%%%%%%%%%%%%%%%%
mod_way=0;     %µ÷ÖÆ½âµ÷·½Ê½
EbN0indB=10;
rho=1;
init_EbNjindB=0.9;   % ³õÊ¼ÐÅ¸É±È£¬ÉèÖÃµÄÉÔÎ¢´óÒ»Ð©
%%%% Ëã·¨²ÎÊýÉèÖÃºÍ¼ÆËã %%%%%%%%%%%%%%%%%%%%%%
F=0.5;
L=degree_num-1;    %Ö»ÓÐL¸ö²ÎÊý¿É±ä¡£
NP=2; %%%%%%%%%%%%%%%%%%%%%%%%%%%%%%%%%%%%%%%%%%%%%%%%%%%%%%%%%%%%ÔÝÊ±ÉèÖÃ
delta_EbNj=0.01; %Ã¿´ÎËã·¨µü´úÖÐ½µµÍµÄÐÅÔë±È
max_iter=20;   % ÔÚÄ³¸öÐÅ¸É±ÈÏÂ£¬Ëã·¨×î¶àµü´ú£¨½ø»¯£©µÄ´ÎÊý£¬³¬³öÕâ¸ö´ÎÊý¾ÍÈÏÎªµ±Ç°µÄÐÅ¸É±È+delta_EbNj¾ÍÊÇÃÅÏÞÖµ¡£

% var_index_mat=var_nodes_index_gen(dl,degree_num);
if degree_num==4
var_index_mat=[2 3 4 10;2 3 5 10];
elseif degree_num==5
var_index_mat=[2 3 4 5 10; 2 3 5 6 10; 2 3 6 7 10; 2 3 7 8 10; 2 3 8 9 10];
end;


%%%%% ÃÜ¶È½ø»¯²ÎÊýÉèÖÃ  %%%%%
global delta;
global v_max;
global v_min;
global v_range;
global v;
global ii_vec;
global jj_vec;
global startpoint_vec;
global endpoint_vec;
global ij_length_dist;
delta=0.05;  %Á¿»¯¼ä¸ô
v_max=25;       
v_min=-10;
v_range=[v_min delta v_max];
v=[v_min:delta:v_max];
% load lookup_table_v__20_005_60;  % ÏàÓ¦µÄ²éÕÒ±í
[ii_vec,jj_vec,startpoint_vec,endpoint_vec,ij_length_dist]=Gene_Lookup_Table_for_ChNode_update(v_range);


%%%% ÖØÒª²ÎÊý´òÓ¡  %%%%%%%%%%%%%%%%%%%%%%%%%%
fprintf('²»¹æÔòLDPCÂëµÄÂëÂÊÎª%2.2f\n',R);
fprintf('±äÁ¿½Úµã×î´ó¶ÈÊýdl=%d\n',dl);
fprintf('ÐÅÔë±ÈÎª %2.2f dB, ¸ÉÈÅ±ÈÀýrho= %2.2f\n ',EbN0indB,rho);
fprintf('µü´úÖÐÐÅ¸É±ÈµÄ²½²îdelta_EbNj= %2.2f dB,×î´óµü´ú´ÎÊýÎª %d ´Î\n',delta_EbNj,max_iter);
fprintf('´ýËÑË÷µÄ¶ÈÊý¾ØÕóÎª\n');
var_index_mat
Current_EbNjindB=init_EbNjindB; % ÉèÖÃµ±Ç°Ñ­»·ÖÐµÄÐÅ¸É±È
for var_index_ii=1:length(var_index_mat(:,1))     % ¶ÔÃ¿Ò»ÖÖ¶ÈÊý½øÐÐËÑË÷
    fprintf('µ±Ç°ËÑË÷µÄ¶ÈÊýÎª\n');
    var_index=var_index_mat(var_index_ii,:)
%%%%%%%%%%%%%  Ëã·¨µü´ú²¿·Ö  %%%%%%%%%%%%%%%%
change_EbNj=1;
% change_EbNj_flag=0;
if var_index_ii>1
   Current_EbNjindB=latest_threshold;  % var_index_matµÄµÚ¶þÐÐÒÔºó¿ÉÒÔÒÔÇ°ÃæËÑË÷µ½µÄÃÅÏÞÖµÎª±ê×¼£¬¿´ÄÜ·ñÓÐ¸üºÃµÄ·Ö²¼¡£
end;
while change_EbNj
    fprintf('µ±Ç°ÐÅ¸É±È=%2.5f dB\n',Current_EbNjindB);
%%%%%% ³õÊ¼»¯  %%%%%%
piG=zeros(NP,L);  % ´æ´¢²ÎÊýÏòÁ¿
PeiG=zeros(NP,1);  % ´æ´¢piGÃ¿Ò»¸öÐÐÏòÁ¿¶ÔÓ¦µÄÊ£Óà´íÎó
for ii=1:NP
    degree=rand(1,degree_num); var_degree(var_index)=degree/sum(degree); 
    if ii==1 
    piG(ii,:)=var_degree(var_index(2:end));
    [ch_index,ch_degree]=gen_check_dist(var_index,var_degree,R);
    PeiG(ii)=Cost_fun(Current_EbNjindB,EbN0indB,rho,R,var_degree,ch_degree);
end;
[Pe_best_G,best_i]=min(PeiG);
pbestG=piG(best_i,:);
%%%%%% ¼ÇÂ¼×î¼ÑÖµµÄ¶È·Ö²¼  %%%%
fprintf('µ±Ç°Îª³õÊ¼»¯½×¶Î\n');
fprintf('×îµÍÎóÂëÂÊÎª%2.5E\n',Pe_best_G);
fprintf('degree= ');
for printf_ii=1:length(pbestG)
    fprintf('%6.8E  ',pbestG(printf_ii));
end;
fprintf('\n');

if Pe_best_G<1e-8 % Èç¹û³õÊ¼·Ö²¼¾ÍÂú×ãÎóÂëÂÊÒªÇóÔò²»ÔÙ½ø»¯£¬½µµÍÐÅ¸É±ÈÔÙ´Î½øÐÐËÑË÷
   latest_var_index=var_index;   % ¼ÇÂ¼µ±Ç°×îºÃ·Ö²¼µÄ¶ÈÊý
   latest_pbestG=pbestG;   %  ¼ÇÂ¼µ±Ç°×îºÃµÄ·Ö²¼
   latest_threshold=Current_EbNjindB; % ¼ÇÂ¼µ±Ç°ÐÅ¸É±È
   Current_EbNjindB=Current_EbNjindB-delta_EbNj;
%    change_EbNj_flag=1;
   continue;      
end;


keep_search=1;
iter_times=0;
while keep_search
%%%%%% Í»±ä£¨mutation£©ÓëÑ¡Ôñ%%%%%%%%
viG1=zeros(NP,L);
PviG1=zeros(NP,1);
for ii=1:NP
    r_vec_long=randperm(NP);
    r_vec=r_vec_long(1:4);
    viG1(ii,:)=pbestG+F*(piG(r_vec(1),:)-piG(r_vec(2),:)+piG(r_vec(3),:)-piG(r_vec(4),:));   % ¸Ã±í´ïÊ½¿ÉÄÜ»áÓÐÄ³Ð©ÔªËØÎª¸ºÖµµÄÇé¿ö£¬Õâ¾ÍÐèÒªÔÚ¼ÆËã´ú¼Ûº¯ÊýÊ±ÄÜ¹»¶ÔÆä¼ì´í£¬ÇÒ½«·µ»ØµÄ´íÎó¸ÅÂÊÉèµÄºÜ´ó
    var_degree(var_index(2:end))=viG1(ii,:);var_degree(var_index(1))=1-sum(var_degree(var_index(2:end)));
    [ch_index,ch_degree]=gen_check_dist(var_index,var_degree,R);
    PviG1(ii)=Cost_fun(Current_EbNjindB,EbN0indB,rho,R,var_degree,ch_degree);
    if PviG1(ii)<PeiG(ii)
       piG(ii,:)=viG1(ii,:);      % ·Ö²¼¸üÐÂ
       PeiG(ii)=PviG1(ii);        % ÎóÂëÂÊ¸üÐÂ
    end;
end;
[Pe_best_G,best_i]=min(PeiG);
pbestG=piG(best_i,:);

iter_times=iter_times+1;
fprintf('µÚ %d ´Îµü´ú½áÊø£¬ÇÒ×î¼Ñ´íÎó¸ÅÂÊÎª %2.5E\n',iter_times,Pe_best_G);
fprintf('degree= ');
for printf_ii=1:length(pbestG)
    fprintf('%6.8E  ',pbestG(printf_ii));
end;
fprintf('\n');
%%%%%% Í£Ö¹×¼Ôò %%%%
if Pe_best_G>=1e-8
   if iter_times>max_iter   % ³¬³ö×î´óµü´ú´ÎÊý£¬Í£Ö¹µ±Ç°¶ÈÊýÏÂµÄµü´ú
       keep_search=0;
       change_EbNj=0;
   end;
else
   keep_search=0;
   latest_var_index=var_index;  %¼ÇÂ¼µ±Ç°×îºÃ·Ö²¼µÄ¶ÈÊý
   latest_pbestG=pbestG;   %  ¼ÇÂ¼µ±Ç°×îºÃµÄ·Ö²¼
   latest_threshold=Current_EbNjindB; % ¼ÇÂ¼µ±Ç°ÐÅ¸É±È
   Current_EbNjindB=Current_EbNjindB-delta_EbNj;
%    change_EbNj_flag=1;
end;

end;  % while keep_search

end;  % while change_EbNj


fprintf('±äÁ¿½ÚµãÎªÏÂÁÐ¶ÈÊýµÄ·Ö²¼ËÑË÷Íê³É(¶ÈÊý2Ê¡ÂÔ)£º\n');
for pp=2:length(var_index)
    fprintf('%d ',var_index(pp));
end;fprintf('\n');
fprintf('Ä¿Ç°×î¼ÑµÄ¶ÈÊý¼°Æä·Ö²¼·Ö±ÈÎª(¶ÈÊý2Ê¡ÂÔ)£º\n');
for pp=2:length(latest_var_index)
    fprintf('%d ',latest_var_index(pp));
end;fprintf('\n');
for pp=1:length(latest_pbestG)
    fprintf('%d ',latest_pbestG(pp));
end;fprintf('\n');
fprintf('ÃÅÏÞÖµÎª%2.4fdB\n',latest_threshold);


end;   %for var_index_ii=1:length(var_index_mat(:,1))


toc;
diary off;
