# Supplementary material for: An Efficient Design of Systematic Rateless Codes
Source: Hindawi journal article supplement (doi:10.1155/2020/8068414), 2020-05-19
Supplement: f1 [file 8068414.f1.zip › supplementary files/Matlab_code_for_Figure1/BER_by_DDE/gen_check_dist.m]

function [ch_index,ch_degree]=gen_check_dist(var_index,var_degree,r)
%%%%  ²úÉú·ûºÏÂëÂÊÒªÇóµÄÐ£Ñé½Úµã¶È·Ö²¼  %%%
if isempty(find(var_degree<0,1)) && isempty(find(var_degree>=1,1))
else
    ch_index=-1;
    ch_degree=-1;
    return;
end;
dc_av=1/((1-r)*sum(var_degree(var_index)./var_index));   % Ð£Ñé½ÚµãÆ½¾ù¶ÈÊý
ch_index(1)=floor(dc_av);ch_index(2)=ch_index(1)+1;
ch_degree(ch_index(2))=ch_index(2)-ch_index(2)*ch_index(1)/dc_av;
ch_degree(ch_index(1))=1-ch_degree(ch_index(2));
