# Supplementary material for: An Efficient Design of Systematic Rateless Codes
Source: Hindawi journal article supplement (doi:10.1155/2020/8068414), 2020-05-19
Supplement: f1 [file 8068414.f1.zip › supplementary files/Matlab_code_for_Figure1/BER_by_DDE/Gene_Lookup_Table_for_ChNode_update.m]

%%% 20160910  ÀëÉ¢ÃÜ¶È½ø»¯Ê±Ð£Ñé½ÚµãÏûÏ¢¸üÐÂµÄ¡°R¡±ÔËËãËùÐèµÄ²éÕÒ±í£¬ÊäÈëÎªÏûÏ¢£¨×Ô±äÁ¿£©È¡Öµ·¶Î§ºÍ²ÉÑù¼ä¸ô£¬Êä³öÊÇ²éÕÒ±íË÷ÒýÐÅÏ¢
function [ii_vec,jj_vec,startpoint_vec,endpoint_vec,ij_length_dist]=Gene_Lookup_Table_for_ChNode_update(v_range)
% clear;
% clc;
% v_range=[-20 0.05 260]
%  ÓëChNode_R2_first_funÒÔ¼°ChNode_R2_funº¯ÊýÅäºÏÊ¹ÓÃ£¬Ä¿Ç°ÈÏÎªChNode_R2_first_funµÄËÙ¶ÈÂÔ¿ì£¨20160910£¬ËäÈ»ChNode_R2_first_fun²ÉÓÃÁËÑ­»·£¬µ«ÊÇChNode_R2_funÖÐÏòÁ¿Î¬¶È½Ï´ó£©
%  v_range´ú±íÏûÏ¢µÄÈ¡Öµ·¶Î§ºÍ²ÉÑù¼ä¸ô£¬ÀýÈç v_range=[-10 0.1 20];
%  ii_vec,jj_vec·Ö±ð´ú±í¡°R2¡±ÔËËãµÄÏûÏ¢¶ÔÓ¦µÄË÷ÒýÎ»ÖÃ£¬¶þÕßsizeÒ»Ñù
%  startpoint_vec,endpoint_vec·Ö±ð´ú±íÏûÏ¢Ã¿¸öÏûÏ¢²ÉÑùµãÔÚÏòÁ¿ii_vec£¨jj_vec£©ÖÐÆðÊ¼ºÍ½áÊøµÄÎ»ÖÃ
% delete Gene_Lookup_Table_v__5_005_45_Process;
% diary Gene_Lookup_Table_v__5_005_45_Process;
% tic;

v_min=v_range(1);delta=v_range(2);v_max=v_range(3);
v=[v_min:delta:v_max];
[a,b]=meshgrid(v,v);
R_a_b=2*atanh(tanh(a/2).*tanh(b/2));    % ÏûÏ¢½øÐÐTanhÔËËãºóµÄ½á¹û¾ØÕó
% [temp_ii,temp_jj]=find(R_a_b>v_max);
R_a_b(R_a_b>v_max)=v_max;
% [temp_ii,temp_jj]=find(R_a_b<v_min);
R_a_b(R_a_b<v_min)=v_min;
R_a_b_Q=Quan_fun2(R_a_b,delta);


ij_length_dist=zeros(1,length(v));  % ¼ÇÂ¼Ã¿¸öµãÓÐ¶àÉÙ¸ö¸ÅÂÊÖÊÁ¿·ÖÁ¿£¨ÖÆ±íÓÃ£©
vec_point=1;       % µ±Ç°Ö¸Õë
startpoint_vec=zeros(1,length(v));   % ÏÂÃæii_vecÖÐÃ¿¸öv¶ÔÓ¦µÄÆðÊ¼Î»ÖÃ
endpoint_vec=zeros(1,length(v));
ii_vec=zeros(1,length(v)^2);    % ¼ÇÂ¼paµÄ½Ç×ø±êii
jj_vec=zeros(1,length(v)^2);    % ¼ÇÂ¼pbµÄ½Ç×ø±êjj
for v_index=1:length(v)
    startpoint_vec(v_index)=vec_point; % ¼ÇÂ¼Ã¿¸övÖµÔÚii_vecÏòÁ¿ÖÐ¶ÔÓ¦µÄÆðÊ¼Î»ÖÃ
    [i_i,j_j]=find(abs(R_a_b_Q-v(v_index))<10^-5);   % ×¢Òâ¿ÉÄÜÓÐÐ©ÊµÊýÖµÔÚmatlabÖÐÓÃµÈºÅ¿ÉÄÜ¿ÉÄÜÍ³¼Æ²»ÉÏ£¬ËùÒÔÓÃ²îÖµµÄ¾ø¶ÔÖµ±È½Ï×¼È·
    ij_length_dist(v_index)=length(i_i);
    if isempty(i_i)~=1     
       ii_vec(vec_point:vec_point+ij_length_dist(v_index)-1)=i_i;
       jj_vec(vec_point:vec_point+ij_length_dist(v_index)-1)=j_j;
       vec_point=vec_point+ij_length_dist(v_index);      
    end;
    endpoint_vec(v_index)=vec_point-1;   % Èç¹ûij_length_distÓÐ0ÔªËØ£¬ÄÇÃ´endpoint_vecÒ²Ò»Ö±²»¶¯
    
%     if mod(v_index,500)==0
%         fprintf('v_indexÎª%d\n',v_index);
%     end;  
end;
if  isempty(find(endpoint_vec<0,1))
    fprintf('ÖÆ±í³É¹¦\n');
else
    error('µÚÒ»¸öÏûÏ¢²ÉÑùÎÞÖµ£¬ÐèÒªÌØ±ð´¦Àí£¡\n');
end;
% save lookup_table_v__5_005_45 ij_length_dist startpoint_vec endpoint_vec ii_vec jj_vec;
%  startpoint_vec,endpoint_vec·Ö±ð´ú±íÏûÏ¢Ã¿¸öÏûÏ¢²ÉÑùµãÔÚÏòÁ¿ii_vec£¨jj_vec£©ÖÐÆðÊ¼ºÍ½áÊøµÄÎ»ÖÃ
% toc;
% diary off
