# Supplementary material for: An Efficient Design of Systematic Rateless Codes
Source: Hindawi journal article supplement (doi:10.1155/2020/8068414), 2020-05-19
Supplement: f1 [file 8068414.f1.zip › supplementary files/Matlab_code_for_Figure1/BER_by_DDE/Gene_Lookup_Table_v__5_005_45_Process]

v_indexÎª500
v_indexÎª1000
ÖÆ±í³É¹¦
Ê±¼äÒÑ¹ý 1.833583 Ãë¡£
