# Supplementary material for: An Efficient Design of Systematic Rateless Codes
Source: Hindawi journal article supplement (doi:10.1155/2020/8068414), 2020-05-19
Supplement: f1 [file 8068414.f1.zip › supplementary files/Matlab_code_for_Figure1/BER_by_DDE/Gene_Lookup_Table_v__10_005_30_Process]

{Î´¶¨ÒåÓë 'double' ÀàÐÍµÄÊäÈë²ÎÊýÏà¶ÔÓ¦µÄº¯Êý 'Quan_fun2'¡£

³ö´í <a href="matlab:helpUtils.errorDocCallback('Gene_Lookup_Table_for_ChNode_update', 'E:\matlab_works\20170110ºóµÄ³ÌÐò\²î·Ö½ø»¯ËÑË÷¶È·Ö²¼\Gene_Lookup_Table_for_ChNode_update.m', 22)" style="font-weight:bold">Gene_Lookup_Table_for_ChNode_update</a> (<a href="matlab: opentoline('E:\matlab_works\20170110ºóµÄ³ÌÐò\²î·Ö½ø»¯ËÑË÷¶È·Ö²¼\Gene_Lookup_Table_for_ChNode_update.m',22,0)">line 22</a>)
R_a_b_Q=Quan_fun2(R_a_b,delta);
} 
[ii_vec,jj_vec,startpoint_vec,endpoint_vec]=Gene_Lookup_Table_for_ChNode_update([-10 0.05 30]);
[¾¯¸æ: Î´ÕÒµ½ÎÄ¼þ»òÕßÈ¨ÏÞ±»¾Ü¾ø] 
[> In <a href="matlab: opentoline('E:\matlab_works\20170110ºóµÄ³ÌÐò\²î·Ö½ø»¯ËÑË÷¶È·Ö²¼\Gene_Lookup_Table_for_ChNode_update.m',10,1)">Gene_Lookup_Table_for_ChNode_update at 10</a>] 
v_indexÎª500
ÖÆ±í³É¹¦
Ê±¼äÒÑ¹ý 1.101736 Ãë¡£
