# Supplementary material for: An Efficient Design of Systematic Rateless Codes
Source: Hindawi journal article supplement (doi:10.1155/2020/8068414), 2020-05-19
Supplement: f1 [file 8068414.f1.zip › supplementary files/Matlab_code_for_Figure1/BER_by_DDE/Get_Initial_BFSK_Message.m]

%%%%%%% 2016405   ·ÇÏà¸É½âµ÷BFSK²»Í¬ºÏ²¢Êä³öLLRµÄ·Ö²¼º¯Êý
function Initial_LLR=Get_Initial_BFSK_Message(EbNjindB,combining_select,L,rho,code_rate,L_range,EbN0indB)
%%%%%%%%%%%%%%%%    ²ÎÊýÉèÖÃ     %%%%%%%%%%%%%%%%%%%%%%%%%%%%%%
EbNj=10^(EbNjindB/10);
EbN0=10^(EbN0indB/10);
Es=1;    
Eb=Es/code_rate*L;
N0=Eb/EbN0;
Nj=Eb/EbNj;     % include_noise¾ö¶¨ÊÇ·ñ°üº¬ÔëÉù


%%%%%%%%%%%%%%%%%%%%%%%%%%%%%%%%%%%%%%%%%%%%%%%%%%%%%
if combining_select==1             %%%%%% ×î´óËÆÈ»ºÏ²¢
    if L_range(1)<=-50
        error('ÏûÏ¢²ÉÑùÏÂÏÞ¹ýÐ¡\n');
    end;
% ÉèÖÃÆ½·½ÂÉ¼ì²âÆ÷Êä³öY1ºÍY0µÄ²ÉÑù¼ä¸ôºÍ·¶Î§
delta_Y=0.01;
Y_max=160;
Y_min=0;
Y_vec=[Y_min:delta_Y:Y_max];   % Æ½·½ÂÉ¼ì²âÆ÷Êä³ö£¨»ò³ËÉÏÄ³¸öÏµÊýºó£©µÄËæ»ú±äÁ¿

omiga=2*Es/(N0+Nj/rho);
pY1_J=Y_vec/omiga.*exp(-Y_vec.^2/(2*omiga)-omiga/2).*besseli(0,Y_vec); %³ËÉÏÏµÊýºóµÄËæ»ú±äÁ¿·Ö²¼£¨¹«Ê½£©¼´ Y1=2*sqrt(Y1l*Es)/Nl,Y0=2*sqrt(Y0l*Es)/Nl
pY0_J=Y_vec/omiga.*exp(-Y_vec.^2/(2*omiga));
omiga=2*Es/N0;
pY1_N=Y_vec/omiga.*exp(-Y_vec.^2/(2*omiga)-omiga/2).*besseli(0,Y_vec); %³ËÉÏÏµÊýºóµÄËæ»ú±äÁ¿·Ö²¼£¨¹«Ê½£©¼´ Y1=2*sqrt(Y1l*Es)/Nl,Y0=2*sqrt(Y0l*Es)/Nl
pY0_N=Y_vec/omiga.*exp(-Y_vec.^2/(2*omiga));
% plot(Y_vec,[pY1_J;pY0_J;pY1_N;pY0_N]);

if L_range(3)>150
   L_max=L_range(3);
else
    L_max=150;        % ×î´óÖµ     ÈËÎªÉèÖÃ£¬ÒòÎªÎÞ¸ÉÈÅÊ±£¬ÏÂÃæµÄpL0_N£¨ÎÞ¸ÉÈÅÇÒÏÂÖ§Â·Êä³ö¶ÔÓ¦µÄÏî£©ÈÝÒ×³¬³ö·¶Î§
end;
delta_L=L_range(2);
if L_range(1)<-50
    L_min=L_range(1);
else
    L_min=-50;       % ×îÐ¡Öµ
end;
L_vec=L_min:delta_L:L_max; 


% [a,b]=meshgrid(Y_vec,Y_vec);    
% R_a_b=log(besseli(0,a)./besseli(0,b));      % ÓÉÓÚbesseliº¯ÊýÈÝÒ×³¬³öÄÚ´æ£¬´óÒ»µãµÄ¾ØÕóÔËËã±È½ÏÂý£¬ËùÒÔ»¹ÊÇ¿¼ÂÇÓÃÏòÁ¿
% R_a_b(R_a_b>L_max)=L_max;
% R_a_b(R_a_b<L_min)=L_min;
% R_a_b_Q=Quan_fun2(R_a_b,delta_L);
% 
% pLJ=zeros(1,length(L_vec));
% pLN=zeros(1,length(L_vec));
% for L_index=1:length(L_vec)
%     [ii,jj]=find(abs(L_vec(L_index)-R_a_b_Q)<10^-6);
%     if isempty(ii)~=1
%        pLJ(L_index)=pY1_J(ii)*pY0_J(jj);
%        pLN(L_index)=pY1_N(ii)*pY0_N(jj);
%     end;
% end;

%%%%¡¡±´Èû¶ûº¯ÊýÈ¡¶ÔÊýËæ»ú±äÁ¿µÄ·Ö²¼¡ª¡ªÖ»ÄÜÓÃPMF·½·¨£¬Ð´²»³ö±í´ïÊ½
L_from_Y=Quan_fun2(log(besseli(0,Y_vec)),delta_L);
pL1_J=zeros(1,length(L_vec));
pL0_J=zeros(1,length(L_vec));
pL1_N=zeros(1,length(L_vec));
pL0_N=zeros(1,length(L_vec));
for L_index=1:length(L_vec)
    ii=find(abs(L_vec(L_index)-L_from_Y)<10^-6);
    if isempty(ii)~=1
       pL1_J(L_index)=sum(pY1_J(ii));
       pL0_J(L_index)=sum(pY0_J(ii));
       pL1_N(L_index)=sum(pY1_N(ii));
       pL0_N(L_index)=sum(pY0_N(ii));
    end;
end;
if L_min>=0 || L_max<abs(L_min)
    error('ÏûÏ¢×îÐ¡È¡Öµ±ØÐëÐ¡ÓÚ0¶øÇÒÕýÖµÇø¼äÒª±È¸ºÖµÇø¼äÒª´ó£¡\n');
end;
temp_pL0_J=[zeros(1,(L_max+L_min)/delta_L) pL0_J];   % Õý¸ºÇø¼äµÈ³¤¶È
temp_pL0_N=[zeros(1,(L_max+L_min)/delta_L) pL0_N]; 
temp_pL_0_J=fliplr(temp_pL0_J);   % ²úÉú-L0µÄpdf
temp_pL_0_N=fliplr(temp_pL0_N);   % ²úÉú-L0µÄpdf
pL_0_J=temp_pL_0_J((L_max+L_min)/delta_L+1:(L_max+L_min)/delta_L+length(L_vec));
pL_0_N=temp_pL_0_N((L_max+L_min)/delta_L+1:(L_max+L_min)/delta_L+length(L_vec));
% figure;plot(L_vec,[pL1_J;pL_0_J;pL1_N;pL_0_N]);

pL1_J=pL1_J/sum(pL1_J)/delta_L;      % Ô­À´µÄ»ý·ÖºÍÎª1/delta_Y,ÏÖÔÚÒª»»Îª1/delta_L
pL1_N=pL1_N/sum(pL1_N)/delta_L;
pL_0_J=pL_0_J/sum(pL_0_J)/delta_L;
pL_0_N=pL_0_N/sum(pL_0_N)/delta_L;
%%%% ÓÉ±´Èû¶ûº¯ÊýÈ¡¶ÔÊýËæ»ú±äÁ¿µÄ·Ö²¼ÇóÈ¡×îºóµÄLLR·Ö²¼
p_ML_mat=zeros(L+1,length(L_vec)); % Ìõ¼þÃÜ¶È
for c=0:L                          % cÌø±»¸ÉÈÅ
pL1_J_zero=[pL1_J zeros(1,(2*L-1)*length(L_vec)-(2*L-1))];          % Ã¿´Î¶¼ÊÇ2L¸ö±äÁ¿²ÎÓë¾í»ý£¬ÄÇÃ´fftÊ±µÄ³¤¶ÈÉèÎª2L*length(L_vec)-(2L-1),²¹Áã³¤¶ÈÎª£¨2L-1£©*length(L_vec)-(2L-1)
pL_0_J_zero=[pL_0_J zeros(1,(2*L-1)*length(L_vec)-(2*L-1))];
pL1_N_zero=[pL1_N zeros(1,(2*L-1)*length(L_vec)-(2*L-1))];
pL_0_N_zero=[pL_0_N zeros(1,(2*L-1)*length(L_vec)-(2*L-1))];
pL_ML_c_long=ifft((fft(pL1_J_zero).*fft(pL_0_J_zero)).^c.*(fft(pL1_N_zero).*fft(pL_0_N_zero)).^(L-c))*delta_L^(2*L-1);
pL_ML_c=pL_ML_c_long(abs(L_min)/delta_L*(2*L-1)+1:abs(L_min)/delta_L*(2*L-1)+length(L_vec));
pL_ML_c(pL_ML_c<0)=0;   % fftÖ®ºóÓÐÐ©¼«Ð¡µÄ¸ºÖµ£¨ÀýÈç10^-16¼¶£©£¬ÊÇÔËËãÎó²î
p_ML_mat(c+1,:)=nchoosek(L,c)*rho^c*(1-rho)^(L-c)*pL_ML_c;
end;
pL_ML=sum(p_ML_mat,1);
if abs(sum(pL_ML)*delta_L-1)>0.0001   %Èç¹û³õÊ¼ÏûÏ¢»ý·ÖºÍÆ«Àë1Ì«Ô¶Ó¦¸Ã¼ÇÂ¼ÏÂÀ´
    fprintf('³õÊ¼ÏûÏ¢pL_ML»ý·ÖºÍÎª %5.6f £¡ML combining\n',sum(pL_ML)*delta_L);
end;

L_start_point=abs((-50-L_range(1)))/L_range(2)+1;
L_end_point=L_start_point+(L_range(3)-L_range(1))/L_range(2);
Initial_LLR=pL_ML(L_start_point:L_end_point);
Initial_LLR(1)=sum(pL_ML(1:L_start_point));  % downflow
Initial_LLR(end)=sum(pL_ML(L_end_point:end));  % overflow
return;


elseif combining_select==2     %%%% Æ½·½ÂÉÏßÐÔºÏ²¢
    if L==1   
        error('ÇëÊ¹ÓÃ³Ë»ýºÏ²¢µÄ³ÌÐò¼ÆËãL=1µÄÇé¿ö£¬ÒòÎª´ËÊ±³õÊ¼ÏûÏ¢µÄ·ÖÄ¸Ïî×î´óÖµÊÇÔÚ0´¦È¡µÃ£¬¶øÈ¡Öµ·¶Î§Ó¦¸ÃÊÇ´óÓÚ0µÄ\n');  %·Ö×ÓÏîµÄÃÜ¶Èº¯ÊýµÄ¼«´óÖµÇ÷ÏòÓÚ0£¬ËùÒÔ²»ºÃ²ÉÑù£¬¶øL>1Ê±£¬·ÖÄ¸ÏîµÄ¼«´óÖµ²»ÊÇÇ÷ÏòÓÚ0£¬ËùÒÔ²ÉÑùÄÜ¹»Âú×ãÒªÇó
    end;
L_max=L_range(3);    
delta_L=L_range(2);
L_min=L_range(1);
L_vec=L_min:delta_L:L_max;

s_max=40;       % ÔÚ¸ÐÐËÈ¤µÄ·¶Î§ÄÚËÆºõÖ»µ½20¼´¿É
s_min=0;
delta_s=0.01;
s_vec=[s_min:delta_s:s_max];


pL_SL_mat=zeros(L+1,length(L_vec));
for c=0:L
    if c>0 && c<L
    Nl=N0+Nj/rho;
    ps1_J=1/Nl*(s_vec/c/Es).^((c-1)/2).*exp(-(c*Es+s_vec)/Nl).*besseli(c-1,2*sqrt(c*Es*s_vec)/Nl);
    ps0_J=1/gamma(c)/(Nl^c)*s_vec.^(c-1).*exp(-s_vec/Nl);
    Nl=N0;
    ps1_N=1/Nl*(s_vec/(L-c)/Es).^((L-c-1)/2).*exp(-((L-c)*Es+s_vec)/Nl).*besseli(L-c-1,2*sqrt((L-c)*Es*s_vec)/Nl);
    ps0_N=1/gamma(L-c)/(Nl^(L-c))*s_vec.^(L-c-1).*exp(-s_vec/Nl);
    ps1_long=ifft(fft([ps1_J zeros(1,length(s_vec)-1)]).*fft([ps1_N zeros(1,length(s_vec)-1)]))*delta_s;
    ps1=ps1_long(1:length(s_vec));
    ps1(ps1<0)=0;
    ps0_long=ifft(fft([ps0_J zeros(1,length(s_vec)-1)]).*fft([ps0_N zeros(1,length(s_vec)-1)]))*delta_s;
    ps0=ps0_long(1:length(s_vec));
    ps0(ps0<0)=0;
    elseif c==0   % Ã»ÓÐÌø±»¸ÉÈÅ
    Nl=N0;
    ps1=1/Nl*(s_vec/(L-c)/Es).^((L-c-1)/2).*exp(-((L-c)*Es+s_vec)/Nl).*besseli(L-c-1,2*sqrt((L-c)*Es*s_vec)/Nl);
    ps0=1/gamma(L-c)/(Nl^(L-c))*s_vec.^(L-c-1).*exp(-s_vec/Nl);
    elseif c==L   % ËùÓÐÌø¶¼±»¸ÉÈÅ
    Nl=N0+Nj/rho;
    ps1=1/Nl*(s_vec/c/Es).^((c-1)/2).*exp(-(c*Es+s_vec)/Nl).*besseli(c-1,2*sqrt(c*Es*s_vec)/Nl);
    ps0=1/gamma(c)/(Nl^c)*s_vec.^(c-1).*exp(-s_vec/Nl);
    end;
    
    ps1=ps1/sum(ps1)/delta_s;
    ps0=ps0/sum(ps0)/delta_s;
    
    
    L_from_s=Quan_fun2(log(s_vec),delta_L);
    pL1=zeros(1,length(L_vec));
    pL0=zeros(1,length(L_vec));
for L_index=1:length(L_vec)
    ii=find(abs(L_vec(L_index)-L_from_s)<10^-6);
    if isempty(ii)~=1
       pL1(L_index)=sum(ps1(ii));
       pL0(L_index)=sum(ps0(ii));
    end;
end;
pL1=pL1/sum(pL1)/delta_L; %  % Ô­À´µÄ»ý·ÖºÍÎª1/delta_s,ÏÖÔÚÒª»»Îª1/delta_L
pL0=pL0/sum(pL0)/delta_L;
if L_min>=0 || L_max<abs(L_min)
    error('ÏûÏ¢×îÐ¡È¡Öµ±ØÐëÐ¡ÓÚ0¶øÇÒÕýÖµÇø¼äÒª´óÓÚ±È¸ºÖµÇø¼ä£¡\n');
end;
temp_pL0=[zeros(1,(L_max+L_min)/delta_L) pL0];   % Õý¸ºÇø¼äµÈ³¤¶È
temp_pL_0=fliplr(temp_pL0);   % ²úÉú-L0µÄpdf
pL_0=temp_pL_0((L_max+L_min)/delta_L+1:(L_max+L_min)/delta_L+length(L_vec));

pL_SL_c_long=ifft(fft([pL1 zeros(1,length(L_vec)-1)]).*fft([pL_0 zeros(1,length(L_vec)-1)]))*delta_L;
pL_SL_c=pL_SL_c_long(abs(L_min)/delta_L+1:abs(L_min)/delta_L+length(L_vec));
pL_SL_c(pL_SL_c<0)=0;
pL_SL_mat(c+1,:)=nchoosek(L,c)*rho^c*(1-rho)^(L-c)*pL_SL_c;

end;

pL_SL=sum(pL_SL_mat,1);
Initial_LLR=pL_SL;


elseif combining_select==3
%%%%% ³Ë»ýºÏ²¢·½·¨
u_max=L_range(3);    % PD ºÏ²¢Ê±ÔÚ³£ÓÃ·¶Î§ÄÚ([-25 25])¶¼¿ÉÒÔÊµÏÖ
u_delta=L_range(2);
u_min=L_range(1);
u_vec=[u_min:u_delta:u_max];
eu_vec=exp(u_vec);

Nl=N0+Nj/rho;
pu_J=(eu_vec./(eu_vec+1).^2+Es/Nl*eu_vec.^2./(eu_vec+1).^3).*exp(-Es/Nl./(eu_vec+1));
Nl=N0;
pu_N=(eu_vec./(eu_vec+1).^2+Es/Nl*eu_vec.^2./(eu_vec+1).^3).*exp(-Es/Nl./(eu_vec+1));
% plot(u_vec,[pu_J;pu_N]);

p_PD_mat=zeros(L+1,length(u_vec)); % Ìõ¼þÃÜ¶È
for c=0:L                          % cÌø±»¸ÉÈÅ
pu_J_zero=[pu_J zeros(1,(L-1)*length(u_vec)-(L-1))];          % Ã¿´Î¶¼ÊÇ2L¸ö±äÁ¿²ÎÓë¾í»ý£¬ÄÇÃ´fftÊ±µÄ³¤¶ÈÉèÎª2L*length(L_vec)-(2L-1),²¹Áã³¤¶ÈÎª£¨2L-1£©*length(L_vec)-(2L-1)
pu_N_zero=[pu_N zeros(1,(L-1)*length(u_vec)-(L-1))];
pL_PD_c_long=ifft(fft(pu_J_zero).^c.*fft(pu_N_zero).^(L-c))*u_delta^(L-1);
pL_PD_c=pL_PD_c_long(abs(u_min)/u_delta*(L-1)+1:abs(u_min)/u_delta*(L-1)+length(u_vec));
pL_PD_c(pL_PD_c<0)=0;   % fftÖ®ºóÓÐÐ©¼«Ð¡µÄ¸ºÖµ£¨ÀýÈç10^-16¼¶£©£¬ÊÇÔËËãÎó²î
p_PD_mat(c+1,:)=nchoosek(L,c)*rho^c*(1-rho)^(L-c)*pL_PD_c;
end;


Initial_LLR=sum(p_PD_mat,1);


% elseif combining_select==2    % µÚÒ»ÀàML½üËÆÊ½·Ö²¼
%     
%     delta_Y=L_range(2);
%     Y_max=L_range(3);
%     Y_min=L_range(1);
%     delta_L=delta_Y;
%     L_max=Y_max;L_min=Y_min;
%     Y_vec_pos=[0:delta_Y:Y_max];      % Y1ºÍY_0ÖµµÄÈ¡Öµ
%     Y_vec_neg=[Y_min:delta_Y:0];
%     
%     Y_vec=[Y_min:delta_Y:Y_max];   % Æ½·½ÂÉ¼ì²âÆ÷Êä³ö£¨»ò³ËÉÏÄ³¸öÏµÊýºó£©µÄËæ»ú±äÁ¿
%     L_vec=Y_vec;
%     pY1=Nj*Y_vec_pos/(2*Es).*exp(-(Nj^2/(4*Es)*Y_vec_pos.^2+Es)/Nj).*besseli(0,Y_vec_pos); %³ËÉÏÏµÊýºóµÄËæ»ú±äÁ¿·Ö²¼£¨¹«Ê½£©
%     pY_0=-Nj*Y_vec_neg/(2*Es).*exp(-Nj*Y_vec_neg.^2/(4*Es));
% 
%     
%     pY1=[zeros(1,length(Y_vec_neg)-1) pY1];
%     pY_0=[pY_0 zeros(1,length(Y_vec_pos)-1)];
% if abs(sum(pY1)*delta_Y-1)>0.0001   %Èç¹û³õÊ¼ÏûÏ¢»ý·ÖºÍÆ«Àë1Ì«Ô¶Ó¦¸Ã¼ÇÂ¼ÏÂÀ´
%     fprintf('³õÊ¼ÏûÏ¢pY1»ý·ÖºÍÎª %5.6f £¡ML combining\n',sum(pY1)*delta_Y);
% end;
% if abs(sum(pY_0)*delta_Y-1)>0.0001   %Èç¹û³õÊ¼ÏûÏ¢»ý·ÖºÍÆ«Àë1Ì«Ô¶Ó¦¸Ã¼ÇÂ¼ÏÂÀ´
%     fprintf('³õÊ¼ÏûÏ¢pY_0»ý·ÖºÍÎª %5.6f £¡ML combining\n',sum(pY_0)*delta_Y);
% end;
% 
%     if  gene_graph==1
%     figure;plot(Y_vec,pY1);hold on;plot(Y_vec,pY_0,'k');
%     xlabel('Y\_vec');ylabel('pY1 pY_0');
%     legend('·Ö×ÓÏî½üËÆÊ½·Ö²¼','·ÖÄ¸ÏîÈ¡¸ºÊý½üËÆÊ½·Ö²¼');
%     title('½üËÆÏîµÄPDF');
%     fprintf('·Ö×ÓÏî½üËÆÊ½PDFµÄ»ý·Ö=%5.5f L=%d, EbNj=%5.5fdB\n',sum(pY1)*delta_Y,L,EbNjindB);
%     fprintf('·ÖÄ¸ÏîÈ¡¸ºÊý½üËÆÊ½µÄPDFµÄ»ý·Ö=%5.5f L=%d, EbNj=%5.5fdB\n',sum(pY_0)*delta_Y,L,EbNjindB);
%     end;
% %     Y_range=[Y_min delta_Y Y_max];
% %     t_range=[-10 0.01 10];          % ÌØÕ÷º¯Êý×Ô±äÁ¿µÄÈ¡Öµ·¶Î§£¬ÓÃ³¤¶ÈÎª3µÄÏòÁ¿±íÊ¾
%     
% %     Phi1=charac(pY1,Y_range,t_range);
% %     Phi_0=charac(pY_0,Y_range,t_range);
% %     Phi_L=(Phi1.*Phi_0).^L;
% %     p_L_ML_2A=Inv_charac(Phi_L,Y_range,t_range);   % µ±Ê±½«µÚÒ»ÀàºÍµÚ¶þÀàµÄÎ»ÖÃ·´ÁË£¬ËùÒÔÕâÀïÊÇ¡°2A¡±±íÊ¾µÚÒ»Àà½üËÆÊ½
%     pY1_zero=[pY1 zeros(1,length(Y_vec)-1)];
%     pY_0_zero=[pY_0 zeros(1,length(Y_vec)-1)];
%     pL_ML_I_L1_long=ifft(fft(pY1_zero).*fft(pY_0_zero))*delta_L;
%     pL_ML_I_L1=pL_ML_I_L1_long(abs(L_min)/delta_L+1:abs(L_min)/delta_L+length(L_vec));
%     pL_ML_I_L1(pL_ML_I_L1<0)=0;   % fftÖ®ºóÓÐÐ©¼«Ð¡µÄ¸ºÖµ£¨ÀýÈç10^-16¼¶£©£¬ÊÇÔËËãÎó²î
%     pL_ML_I_L1_zero=[pL_ML_I_L1 zeros(1,(L-1)*length(L_vec)-(L-1))];
%     pL_ML_I_long=ifft(fft(pL_ML_I_L1_zero).^L)*delta_L^(L-1);
%     pL_ML_I=pL_ML_I_long(abs(L_min)/delta_L*(L-1)+1:abs(L_min)/delta_L*(L-1)+length(L_vec));
%     pL_ML_I(pL_ML_I<0)=0; 
%     if abs(sum(pL_ML_I)*delta_L-1)>0.0001   %Èç¹û³õÊ¼ÏûÏ¢»ý·ÖºÍÆ«Àë1Ì«Ô¶Ó¦¸Ã¼ÇÂ¼ÏÂÀ´
%        fprintf('³õÊ¼ÏûÏ¢pL_ML_I»ý·ÖºÍÎª %5.6f £¡ML-I combining\n',sum(pL_ML_I)*delta_L);
%     end;
%     if  gene_graph==1
%     fprintf('×î´óËÆÈ»ºÏ²¢Ê½I½üËÆ¶ÔÊýËÆÈ»±ÈµÄPDFµÄ»ý·Ö=%5.5f, L=%d, EbNj=%5.5fdB\n',sum(p_L_ML_2A)*delta_L,L,EbNjindB);
%     figure;plot(L_vec,pL_ML_I);
%     xlabel('¶ÔÊýËÆÈ»±È');ylabel('¸ÅÂÊÃÜ¶È');
%     title('×î´óËÆÈ»ºÏ²¢Ê½I½üËÆ¶ÔÊýËÆÈ»±ÈµÄ¸ÅÂÊÃÜ¶È·Ö²¼');
%     end;
%     mean_L=sum(L_vec.*pL_ML_I)*delta_L;  % ¶ÔÊýËÆÈ»±È¾ùÖµ
%     sigma2_L=2*mean_L;     % ¶ÔÊýËÆÈ»±È·½²î£¬ÉèÎª¾ùÖµÁ½±¶
% 
%     if  gene_graph==1
%     hold on;plot(L_vec,1/sqrt(2*pi*sigma2_L)*exp(-(L_vec-mean_L).^2/(2*sigma2_L)),'k');
%     legend('¾«È··Ö²¼','¸ßË¹½üËÆ');
%     end;
%     
%     Initial_LLR=pL_ML_I;
%     mean_L=mean_L;
%     
% 
%  
%     
% elseif combining_select==3
%     %  fprintf('20160501 ·¶Î§ÐèÒªºÃºÃÉèÖÃÒ»ÏÂ£¬-20µ½60ÔÚL=1ÇÒEbNj=10dBÒÔÉÏ²»ÐÐ\n')
%     %  ÔÚÄ¿Ç°µÄÃÅÏÞÇø¼äÄÚ»¹ÊÇ¿ÉÒÔµÄ£¬Ö»ÊÇÔÚrho±È½ÏÐ¡µÄÊ±ºòÐèÒª²ÉÑùÃÜ¶ÈÐ¡Ò»Ð©
% 
%     Y_max=L_range(3);
%     Y_min=L_range(1);
%     delta_Y=L_range(2);
%     L_max=Y_max;L_min=Y_min;delta_L=delta_Y;
%     
%     Y_vec_pos=[0:delta_Y:Y_max];      % Y1ÖµµÄ·¶Î§
%     Y_vec_neg=[Y_min:delta_Y:0];      % Y_0ÖµµÄ·¶Î§
%     Y_vec=[Y_min:delta_Y:Y_max];
%     pY1=Nj/Es*exp(-(Nj^2*Y_vec_pos/Es+Es)/Nj).*besseli(0,2*sqrt(Y_vec_pos));
%     pY_0=Nj/Es*exp(Nj*Y_vec_neg/Es);    % ÓÃÖ±½Ó·¨Ê±ÓÃÕýÖµÇø¼ä¼´¿É
%     Y_vec=[Y_vec_neg(1:end-1) Y_vec_pos];  % Õû¸öYµÄÈ¡Öµ·¶Î§
%     L_vec=Y_vec;
%     
%     pY1=[zeros(1,length(Y_vec_neg)-1) pY1];
%     pY_0=[pY_0 zeros(1,length(Y_vec_pos)-1)];
%     if abs(sum(pY1)*delta_Y-1)>0.0001   %Èç¹û³õÊ¼ÏûÏ¢»ý·ÖºÍÆ«Àë1Ì«Ô¶Ó¦¸Ã¼ÇÂ¼ÏÂÀ´
%        fprintf('³õÊ¼ÏûÏ¢pY1»ý·ÖºÍÎª %5.6f £¡ML combining\n',sum(pY1)*delta_Y);
%     end;
%     if abs(sum(pY_0)*delta_Y-1)>0.0001   %Èç¹û³õÊ¼ÏûÏ¢»ý·ÖºÍÆ«Àë1Ì«Ô¶Ó¦¸Ã¼ÇÂ¼ÏÂÀ´
%        fprintf('³õÊ¼ÏûÏ¢pY_0»ý·ÖºÍÎª %5.6f £¡ML combining\n',sum(pY_0)*delta_Y);
%     end;
%     if  gene_graph==1
%     figure;plot(Y_vec,pY1);hold on;plot(Y_vec,pY_0,'k');
%     xlabel('Y\_vec');ylabel('pY1 pY_0');
%     legend('·Ö×ÓÏî½üËÆÊ½·Ö²¼','·ÖÄ¸ÏîÈ¡¸ºÊý½üËÆÊ½·Ö²¼');
%     title('½üËÆÏîµÄPDF');
%     fprintf('·Ö×ÓÏî½üËÆÊ½PDFµÄ»ý·Ö=%5.5f L=%d, EbNj=%5.5fdB\n',sum(pY1)*delta_Y,L,EbNjindB);
%     fprintf('·ÖÄ¸ÏîÈ¡¸ºÊý½üËÆÊ½µÄPDFµÄ»ý·Ö=%5.5f L=%d, EbNj=%5.5fdB\n',sum(pY_0)*delta_Y,L,EbNjindB);
%     end;
%     
% %     Y_range=[Y_min delta_Y Y_max];
% % %     t_range=[-20 0.01 20];          % ÌØÕ÷º¯Êý×Ô±äÁ¿µÄÈ¡Öµ·¶Î§£¬ÓÃ³¤¶ÈÎª3µÄÏòÁ¿±íÊ¾
% % 
% %     Phi1=charac(pY1,Y_range,t_range);
% %     Phi_0=charac(pY_0,Y_range,t_range);   
% %     Phi_L=(Phi1.*Phi_0).^L;
% %     p_L_ML_1A=Inv_charac(Phi_L,Y_range,t_range);
% %     L_vec=Y_vec;        %´ËÇé¿öÏÂ¶ÔÊýËÆÈ»±ÈµÄÈ¡Öµ·¶Î§¿ÉÒÔÓëYµÄµÄÏàÍ¬ÁË
% %     delta_L=delta_Y;
%     pY1_zero=[pY1 zeros(1,length(Y_vec)-1)];
%     pY_0_zero=[pY_0 zeros(1,length(Y_vec)-1)];
%     pL_ML_II_L1_long=ifft(fft(pY1_zero).*fft(pY_0_zero))*delta_L;
%     pL_ML_II_L1=pL_ML_II_L1_long(abs(L_min)/delta_L+1:abs(L_min)/delta_L+length(L_vec));
%     pL_ML_II_L1(pL_ML_II_L1<0)=0;   % fftÖ®ºóÓÐÐ©¼«Ð¡µÄ¸ºÖµ£¨ÀýÈç10^-16¼¶£©£¬ÊÇÔËËãÎó²î
%     pL_ML_II_L1_zero=[pL_ML_II_L1 zeros(1,(L-1)*length(L_vec)-(L-1))];
%     pL_ML_II_long=ifft(fft(pL_ML_II_L1_zero).^L)*delta_L^(L-1);
%     pL_ML_II=pL_ML_II_long(abs(L_min)/delta_L*(L-1)+1:abs(L_min)/delta_L*(L-1)+length(L_vec));
%     pL_ML_II(pL_ML_II<0)=0; 
%     if abs(sum(pL_ML_II)*delta_L-1)>0.0001   %Èç¹û³õÊ¼ÏûÏ¢»ý·ÖºÍÆ«Àë1Ì«Ô¶Ó¦¸Ã¼ÇÂ¼ÏÂÀ´
%        fprintf('³õÊ¼ÏûÏ¢pL_ML_I»ý·ÖºÍÎª %5.6f £¡ML-II combining\n',sum(pL_ML_II)*delta_L);
%     end;
%     if  gene_graph==1
%     fprintf('×î´óËÆÈ»ºÏ²¢Ê½II½üËÆ¶ÔÊýËÆÈ»±ÈµÄPDFµÄ»ý·Ö=%5.5f, L=%d, EbNj=%5.5fdB\n',sum(p_L_ML_1A)*delta_L,L,EbNjindB);
%     figure;plot(L_vec,pL_ML_II);
%     xlabel('¶ÔÊýËÆÈ»±È');ylabel('¸ÅÂÊÃÜ¶È');
%     title('×î´óËÆÈ»ºÏ²¢Ê½II½üËÆ¶ÔÊýËÆÈ»±ÈµÄ¸ÅÂÊÃÜ¶È·Ö²¼');
%     end;
%     mean_L=sum(L_vec.*pL_ML_II)*delta_L;  % ¶ÔÊýËÆÈ»±È¾ùÖµ
%     sigma2_L=2*mean_L;     % ¶ÔÊýËÆÈ»±È·½²î£¬ÉèÎª¾ùÖµÁ½±¶\
%     if  gene_graph==1
%     hold on;plot(L_vec,1/sqrt(2*pi*sigma2_L)*exp(-(L_vec-mean_L).^2/(2*sigma2_L)),'k');
%     legend('¾«È··Ö²¼','¸ßË¹½üËÆ');
%     end;
%     
%     Initial_LLR=pL_ML_II;
%     mean_L=mean_L;
    
    
%    delta_H=0.05;      %
%    ¶ÔÓÚÕâÖÖºÏ²¢·½·¨£¬²»Í¬µÄÐÅ¸É±ÈºÍ·Ö¼¯¼¶ÊýÏÂµÄÒª±íÊ¾ÍêÕûYµÄPMF£¬ÐèÒªµÄ¾«¶ÈºÜ¸ß£¬·¶Î§ºÜ´ó£¬ËùÒÔ¿¼ÂÇÓÃÁ¿»¯Ê½Ö±½ÓÇóËÆÈ»±ÈPMF£¬µ«ÊÇ·¶Î§´óµÄ
%    Ê±ºòÒªÇóµÄ´æ´¢Ò²´ó£¬³¬³öÄÚ´æ·¶Î§¡£
%     H_max=500;
%     H_min=0;
    
%     Y_vec_pos=[0:delta_Y:Y_max];      % Y1ÖµµÄ·¶Î§
%     Y_vec_neg=[Y_min:delta_Y:0];      % Y_0ÖµµÄ·¶Î§
%     H_vec=[H_min:delta_H:H_max];
%     pH1=Nj/Es*exp(-(Nj^2*H_vec/Es+Es)/Nj).*besseli(0,2*sqrt(H_vec));
%     pH0=Nj/Es*exp(-Nj*H_vec/Es);    % ÓÃÖ±½Ó·¨Ê±ÓÃÕýÖµÇø¼ä¼´¿É
%     pY_0=Nj/Es*exp(Nj*Y_vec_neg/Es);
%     if  gene_graph==1
%     figure;plot(H_vec,pH1);hold on;plot(H_vec,pH0,'k');
%     xlabel('H\_vec');ylabel('pH1 pH_0');
%     legend('·Ö×ÓÏî½üËÆÊ½·Ö²¼','·ÖÄ¸ÏîÈ¡¸ºÊý½üËÆÊ½·Ö²¼');
%     title('½üËÆÏîµÄPDF');
%     fprintf('·Ö×ÓÏî½üËÆÊ½PDFµÄ»ý·Ö=%5.5f L=%d, EbNj=%5.5fdB\n',sum(pH1)*delta_H,L,EbNjindB);
%     fprintf('·ÖÄ¸ÏîÈ¡¸ºÊý½üËÆÊ½µÄPDFµÄ»ý·Ö=%5.5f L=%d, EbNj=%5.5fdB\n',sum(pH0)*delta_H,L,EbNjindB);
%     end;
%      
%      delta_L=0.05;
%      L_max=60;
%      L_min=-20;
%      L_vec=[L_min:delta_L:L_max];
%       
% [a,b]=meshgrid(H_vec,H_vec);
% R_a_b=a-b;    % ³ËÒÔÏµÊýµÄËæ»ú±äÁ¿µÄ¼ÆËãÊ½
% % [temp_ii,temp_jj]=find(R_a_b>L_max);
% % R_a_b(temp_ii,temp_jj)=L_max;
% % [temp_ii,temp_jj]=find(R_a_b<L_min);
% % R_a_b(temp_ii,temp_jj)=L_min;
% R_a_b_Q=Quan_fun(R_a_b,delta_L);  
% 
% [pa,pb]=meshgrid(pH1,pH0);
% pL_mat=pa.*pb*delta_H^2;
% 
% pL_ML_II_direct=zeros(1,length(L_vec));  % ³õÊ¼»¯pL
% for L_index=1:length(L_vec)
%     [ii,jj]=find(abs(R_a_b_Q-L_vec(L_index))<10^-6);
%      if isempty(ii)~=1     
%         pL_ML_direct(L_index)=sum(pL_mat(sub2ind(size(pL_mat),ii,jj)));
%      end;
%      if mod(L_index,100)==0
%         L_index;
%     end;
% end;
% sum(pL_ML_direct);
% plot(L_vec,pL_ML_direct);
    

end;  % if combining_select
