# Supplementary material for: An Efficient Design of Systematic Rateless Codes
Source: Hindawi journal article supplement (doi:10.1155/2020/8068414), 2020-05-19
Supplement: f1 [file 8068414.f1.zip › supplementary files/Matlab_code_for_Figure1/BER_by_DDE/LT_threshold.txt]

ÖÆ±í³É¹¦

k =

   100


k1 =

   102


n =

   300

[Warning: Result may not be exact. Coefficient is greater than 9.007199e+15 and is only accurate to 15 digits] 
[> In <a href="matlab:matlab.internal.language.introspective.errorDocCallback('nchoosek', 'D:\Program Files\MATLAB\R2017a\toolbox\matlab\specfun\nchoosek.m', 92)" style="font-weight:bold">nchoosek</a> (<a href="matlab: opentoline('D:\Program Files\MATLAB\R2017a\toolbox\matlab\specfun\nchoosek.m',92,0)">line 92</a>)
  In <a href="matlab:matlab.internal.language.introspective.errorDocCallback('DDE_algo_main', 'E:\Ñ§Êõ\ÎÄÏ×¿â\ÅçÈªÂëÏà¹Ø\20180404ÅçÈªÂë17ÄêÒÔºó\2018-Analysis and Design of Physical Layer Raptor Codes\³ÌÐò\ÀëÉ¢ÃÜ¶È½ø»¯»ñÈ¡ÃÅÏÞÖµ\DDE_algo_main.m', 82)" style="font-weight:bold">DDE_algo_main</a> (<a href="matlab: opentoline('E:\Ñ§Êõ\ÎÄÏ×¿â\ÅçÈªÂëÏà¹Ø\20180404ÅçÈªÂë17ÄêÒÔºó\2018-Analysis and Design of Physical Layer Raptor Codes\³ÌÐò\ÀëÉ¢ÃÜ¶È½ø»¯»ñÈ¡ÃÅÏÞÖµ\DDE_algo_main.m',82,0)">line 82</a>)] 
[Warning: Result may not be exact. Coefficient is greater than 9.007199e+15 and is only accurate to 15 digits] 
[> In <a href="matlab:matlab.internal.language.introspective.errorDocCallback('nchoosek', 'D:\Program Files\MATLAB\R2017a\toolbox\matlab\specfun\nchoosek.m', 92)" style="font-weight:bold">nchoosek</a> (<a href="matlab: opentoline('D:\Program Files\MATLAB\R2017a\toolbox\matlab\specfun\nchoosek.m',92,0)">line 92</a>)
  In <a href="matlab:matlab.internal.language.introspective.errorDocCallback('DDE_algo_main', 'E:\Ñ§Êõ\ÎÄÏ×¿â\ÅçÈªÂëÏà¹Ø\20180404ÅçÈªÂë17ÄêÒÔºó\2018-Analysis and Design of Physical Layer Raptor Codes\³ÌÐò\ÀëÉ¢ÃÜ¶È½ø»¯»ñÈ¡ÃÅÏÞÖµ\DDE_algo_main.m', 82)" style="font-weight:bold">DDE_algo_main</a> (<a href="matlab: opentoline('E:\Ñ§Êõ\ÎÄÏ×¿â\ÅçÈªÂëÏà¹Ø\20180404ÅçÈªÂë17ÄêÒÔºó\2018-Analysis and Design of Physical Layer Raptor Codes\³ÌÐò\ÀëÉ¢ÃÜ¶È½ø»¯»ñÈ¡ÃÅÏÞÖµ\DDE_algo_main.m',82,0)">line 82</a>)] 
[Warning: Result may not be exact. Coefficient is greater than 9.007199e+15 and is only accurate to 15 digits] 
[> In <a href="matlab:matlab.internal.language.introspective.errorDocCallback('nchoosek', 'D:\Program Files\MATLAB\R2017a\toolbox\matlab\specfun\nchoosek.m', 92)" style="font-weight:bold">nchoosek</a> (<a href="matlab: opentoline('D:\Program Files\MATLAB\R2017a\toolbox\matlab\specfun\nchoosek.m',92,0)">line 92</a>)
  In <a href="matlab:matlab.internal.language.introspective.errorDocCallback('DDE_algo_main', 'E:\Ñ§Êõ\ÎÄÏ×¿â\ÅçÈªÂëÏà¹Ø\20180404ÅçÈªÂë17ÄêÒÔºó\2018-Analysis and Design of Physical Layer Raptor Codes\³ÌÐò\ÀëÉ¢ÃÜ¶È½ø»¯»ñÈ¡ÃÅÏÞÖµ\DDE_algo_main.m', 82)" style="font-weight:bold">DDE_algo_main</a> (<a href="matlab: opentoline('E:\Ñ§Êõ\ÎÄÏ×¿â\ÅçÈªÂëÏà¹Ø\20180404ÅçÈªÂë17ÄêÒÔºó\2018-Analysis and Design of Physical Layer Raptor Codes\³ÌÐò\ÀëÉ¢ÃÜ¶È½ø»¯»ñÈ¡ÃÅÏÞÖµ\DDE_algo_main.m',82,0)">line 82</a>)] 
[Warning: Result may not be exact. Coefficient is greater than 9.007199e+15 and is only accurate to 15 digits] 
[> In <a href="matlab:matlab.internal.language.introspective.errorDocCallback('nchoosek', 'D:\Program Files\MATLAB\R2017a\toolbox\matlab\specfun\nchoosek.m', 92)" style="font-weight:bold">nchoosek</a> (<a href="matlab: opentoline('D:\Program Files\MATLAB\R2017a\toolbox\matlab\specfun\nchoosek.m',92,0)">line 92</a>)
  In <a href="matlab:matlab.internal.language.introspective.errorDocCallback('DDE_algo_main', 'E:\Ñ§Êõ\ÎÄÏ×¿â\ÅçÈªÂëÏà¹Ø\20180404ÅçÈªÂë17ÄêÒÔºó\2018-Analysis and Design of Physical Layer Raptor Codes\³ÌÐò\ÀëÉ¢ÃÜ¶È½ø»¯»ñÈ¡ÃÅÏÞÖµ\DDE_algo_main.m', 82)" style="font-weight:bold">DDE_algo_main</a> (<a href="matlab: opentoline('E:\Ñ§Êõ\ÎÄÏ×¿â\ÅçÈªÂëÏà¹Ø\20180404ÅçÈªÂë17ÄêÒÔºó\2018-Analysis and Design of Physical Layer Raptor Codes\³ÌÐò\ÀëÉ¢ÃÜ¶È½ø»¯»ñÈ¡ÃÅÏÞÖµ\DDE_algo_main.m',82,0)">line 82</a>)] 
[Warning: Result may not be exact. Coefficient is greater than 9.007199e+15 and is only accurate to 15 digits] 
[> In <a href="matlab:matlab.internal.language.introspective.errorDocCallback('nchoosek', 'D:\Program Files\MATLAB\R2017a\toolbox\matlab\specfun\nchoosek.m', 92)" style="font-weight:bold">nchoosek</a> (<a href="matlab: opentoline('D:\Program Files\MATLAB\R2017a\toolbox\matlab\specfun\nchoosek.m',92,0)">line 92</a>)
  In <a href="matlab:matlab.internal.language.introspective.errorDocCallback('DDE_algo_main', 'E:\Ñ§Êõ\ÎÄÏ×¿â\ÅçÈªÂëÏà¹Ø\20180404ÅçÈªÂë17ÄêÒÔºó\2018-Analysis and Design of Physical Layer Raptor Codes\³ÌÐò\ÀëÉ¢ÃÜ¶È½ø»¯»ñÈ¡ÃÅÏÞÖµ\DDE_algo_main.m', 82)" style="font-weight:bold">DDE_algo_main</a> (<a href="matlab: opentoline('E:\Ñ§Êõ\ÎÄÏ×¿â\ÅçÈªÂëÏà¹Ø\20180404ÅçÈªÂë17ÄêÒÔºó\2018-Analysis and Design of Physical Layer Raptor Codes\³ÌÐò\ÀëÉ¢ÃÜ¶È½ø»¯»ñÈ¡ÃÅÏÞÖµ\DDE_algo_main.m',82,0)">line 82</a>)] 
[Warning: Result may not be exact. Coefficient is greater than 9.007199e+15 and is only accurate to 15 digits] 
[> In <a href="matlab:matlab.internal.language.introspective.errorDocCallback('nchoosek', 'D:\Program Files\MATLAB\R2017a\toolbox\matlab\specfun\nchoosek.m', 92)" style="font-weight:bold">nchoosek</a> (<a href="matlab: opentoline('D:\Program Files\MATLAB\R2017a\toolbox\matlab\specfun\nchoosek.m',92,0)">line 92</a>)
  In <a href="matlab:matlab.internal.language.introspective.errorDocCallback('DDE_algo_main', 'E:\Ñ§Êõ\ÎÄÏ×¿â\ÅçÈªÂëÏà¹Ø\20180404ÅçÈªÂë17ÄêÒÔºó\2018-Analysis and Design of Physical Layer Raptor Codes\³ÌÐò\ÀëÉ¢ÃÜ¶È½ø»¯»ñÈ¡ÃÅÏÞÖµ\DDE_algo_main.m', 82)" style="font-weight:bold">DDE_algo_main</a> (<a href="matlab: opentoline('E:\Ñ§Êõ\ÎÄÏ×¿â\ÅçÈªÂëÏà¹Ø\20180404ÅçÈªÂë17ÄêÒÔºó\2018-Analysis and Design of Physical Layer Raptor Codes\³ÌÐò\ÀëÉ¢ÃÜ¶È½ø»¯»ñÈ¡ÃÅÏÞÖµ\DDE_algo_main.m',82,0)">line 82</a>)] 
[Warning: Result may not be exact. Coefficient is greater than 9.007199e+15 and is only accurate to 15 digits] 
[> In <a href="matlab:matlab.internal.language.introspective.errorDocCallback('nchoosek', 'D:\Program Files\MATLAB\R2017a\toolbox\matlab\specfun\nchoosek.m', 92)" style="font-weight:bold">nchoosek</a> (<a href="matlab: opentoline('D:\Program Files\MATLAB\R2017a\toolbox\matlab\specfun\nchoosek.m',92,0)">line 92</a>)
  In <a href="matlab:matlab.internal.language.introspective.errorDocCallback('DDE_algo_main', 'E:\Ñ§Êõ\ÎÄÏ×¿â\ÅçÈªÂëÏà¹Ø\20180404ÅçÈªÂë17ÄêÒÔºó\2018-Analysis and Design of Physical Layer Raptor Codes\³ÌÐò\ÀëÉ¢ÃÜ¶È½ø»¯»ñÈ¡ÃÅÏÞÖµ\DDE_algo_main.m', 82)" style="font-weight:bold">DDE_algo_main</a> (<a href="matlab: opentoline('E:\Ñ§Êõ\ÎÄÏ×¿â\ÅçÈªÂëÏà¹Ø\20180404ÅçÈªÂë17ÄêÒÔºó\2018-Analysis and Design of Physical Layer Raptor Codes\³ÌÐò\ÀëÉ¢ÃÜ¶È½ø»¯»ñÈ¡ÃÅÏÞÖµ\DDE_algo_main.m',82,0)">line 82</a>)] 
[Warning: Result may not be exact. Coefficient is greater than 9.007199e+15 and is only accurate to 15 digits] 
[> In <a href="matlab:matlab.internal.language.introspective.errorDocCallback('nchoosek', 'D:\Program Files\MATLAB\R2017a\toolbox\matlab\specfun\nchoosek.m', 92)" style="font-weight:bold">nchoosek</a> (<a href="matlab: opentoline('D:\Program Files\MATLAB\R2017a\toolbox\matlab\specfun\nchoosek.m',92,0)">line 92</a>)
  In <a href="matlab:matlab.internal.language.introspective.errorDocCallback('DDE_algo_main', 'E:\Ñ§Êõ\ÎÄÏ×¿â\ÅçÈªÂëÏà¹Ø\20180404ÅçÈªÂë17ÄêÒÔºó\2018-Analysis and Design of Physical Layer Raptor Codes\³ÌÐò\ÀëÉ¢ÃÜ¶È½ø»¯»ñÈ¡ÃÅÏÞÖµ\DDE_algo_main.m', 82)" style="font-weight:bold">DDE_algo_main</a> (<a href="matlab: opentoline('E:\Ñ§Êõ\ÎÄÏ×¿â\ÅçÈªÂëÏà¹Ø\20180404ÅçÈªÂë17ÄêÒÔºó\2018-Analysis and Design of Physical Layer Raptor Codes\³ÌÐò\ÀëÉ¢ÃÜ¶È½ø»¯»ñÈ¡ÃÅÏÞÖµ\DDE_algo_main.m',82,0)">line 82</a>)] 
[Warning: Result may not be exact. Coefficient is greater than 9.007199e+15 and is only accurate to 15 digits] 
[> In <a href="matlab:matlab.internal.language.introspective.errorDocCallback('nchoosek', 'D:\Program Files\MATLAB\R2017a\toolbox\matlab\specfun\nchoosek.m', 92)" style="font-weight:bold">nchoosek</a> (<a href="matlab: opentoline('D:\Program Files\MATLAB\R2017a\toolbox\matlab\specfun\nchoosek.m',92,0)">line 92</a>)
  In <a href="matlab:matlab.internal.language.introspective.errorDocCallback('DDE_algo_main', 'E:\Ñ§Êõ\ÎÄÏ×¿â\ÅçÈªÂëÏà¹Ø\20180404ÅçÈªÂë17ÄêÒÔºó\2018-Analysis and Design of Physical Layer Raptor Codes\³ÌÐò\ÀëÉ¢ÃÜ¶È½ø»¯»ñÈ¡ÃÅÏÞÖµ\DDE_algo_main.m', 82)" style="font-weight:bold">DDE_algo_main</a> (<a href="matlab: opentoline('E:\Ñ§Êõ\ÎÄÏ×¿â\ÅçÈªÂëÏà¹Ø\20180404ÅçÈªÂë17ÄêÒÔºó\2018-Analysis and Design of Physical Layer Raptor Codes\³ÌÐò\ÀëÉ¢ÃÜ¶È½ø»¯»ñÈ¡ÃÅÏÞÖµ\DDE_algo_main.m',82,0)">line 82</a>)] 
[Warning: Result may not be exact. Coefficient is greater than 9.007199e+15 and is only accurate to 15 digits] 
[> In <a href="matlab:matlab.internal.language.introspective.errorDocCallback('nchoosek', 'D:\Program Files\MATLAB\R2017a\toolbox\matlab\specfun\nchoosek.m', 92)" style="font-weight:bold">nchoosek</a> (<a href="matlab: opentoline('D:\Program Files\MATLAB\R2017a\toolbox\matlab\specfun\nchoosek.m',92,0)">line 92</a>)
  In <a href="matlab:matlab.internal.language.introspective.errorDocCallback('DDE_algo_main', 'E:\Ñ§Êõ\ÎÄÏ×¿â\ÅçÈªÂëÏà¹Ø\20180404ÅçÈªÂë17ÄêÒÔºó\2018-Analysis and Design of Physical Layer Raptor Codes\³ÌÐò\ÀëÉ¢ÃÜ¶È½ø»¯»ñÈ¡ÃÅÏÞÖµ\DDE_algo_main.m', 82)" style="font-weight:bold">DDE_algo_main</a> (<a href="matlab: opentoline('E:\Ñ§Êõ\ÎÄÏ×¿â\ÅçÈªÂëÏà¹Ø\20180404ÅçÈªÂë17ÄêÒÔºó\2018-Analysis and Design of Physical Layer Raptor Codes\³ÌÐò\ÀëÉ¢ÃÜ¶È½ø»¯»ñÈ¡ÃÅÏÞÖµ\DDE_algo_main.m',82,0)">line 82</a>)] 
[Warning: Result may not be exact. Coefficient is greater than 9.007199e+15 and is only accurate to 15 digits] 
[> In <a href="matlab:matlab.internal.language.introspective.errorDocCallback('nchoosek', 'D:\Program Files\MATLAB\R2017a\toolbox\matlab\specfun\nchoosek.m', 92)" style="font-weight:bold">nchoosek</a> (<a href="matlab: opentoline('D:\Program Files\MATLAB\R2017a\toolbox\matlab\specfun\nchoosek.m',92,0)">line 92</a>)
  In <a href="matlab:matlab.internal.language.introspective.errorDocCallback('DDE_algo_main', 'E:\Ñ§Êõ\ÎÄÏ×¿â\ÅçÈªÂëÏà¹Ø\20180404ÅçÈªÂë17ÄêÒÔºó\2018-Analysis and Design of Physical Layer Raptor Codes\³ÌÐò\ÀëÉ¢ÃÜ¶È½ø»¯»ñÈ¡ÃÅÏÞÖµ\DDE_algo_main.m', 82)" style="font-weight:bold">DDE_algo_main</a> (<a href="matlab: opentoline('E:\Ñ§Êõ\ÎÄÏ×¿â\ÅçÈªÂëÏà¹Ø\20180404ÅçÈªÂë17ÄêÒÔºó\2018-Analysis and Design of Physical Layer Raptor Codes\³ÌÐò\ÀëÉ¢ÃÜ¶È½ø»¯»ñÈ¡ÃÅÏÞÖµ\DDE_algo_main.m',82,0)">line 82</a>)] 
[Warning: Result may not be exact. Coefficient is greater than 9.007199e+15 and is only accurate to 15 digits] 
[> In <a href="matlab:matlab.internal.language.introspective.errorDocCallback('nchoosek', 'D:\Program Files\MATLAB\R2017a\toolbox\matlab\specfun\nchoosek.m', 92)" style="font-weight:bold">nchoosek</a> (<a href="matlab: opentoline('D:\Program Files\MATLAB\R2017a\toolbox\matlab\specfun\nchoosek.m',92,0)">line 92</a>)
  In <a href="matlab:matlab.internal.language.introspective.errorDocCallback('DDE_algo_main', 'E:\Ñ§Êõ\ÎÄÏ×¿â\ÅçÈªÂëÏà¹Ø\20180404ÅçÈªÂë17ÄêÒÔºó\2018-Analysis and Design of Physical Layer Raptor Codes\³ÌÐò\ÀëÉ¢ÃÜ¶È½ø»¯»ñÈ¡ÃÅÏÞÖµ\DDE_algo_main.m', 82)" style="font-weight:bold">DDE_algo_main</a> (<a href="matlab: opentoline('E:\Ñ§Êõ\ÎÄÏ×¿â\ÅçÈªÂëÏà¹Ø\20180404ÅçÈªÂë17ÄêÒÔºó\2018-Analysis and Design of Physical Layer Raptor Codes\³ÌÐò\ÀëÉ¢ÃÜ¶È½ø»¯»ñÈ¡ÃÅÏÞÖµ\DDE_algo_main.m',82,0)">line 82</a>)] 
[Warning: Result may not be exact. Coefficient is greater than 9.007199e+15 and is only accurate to 15 digits] 
[> In <a href="matlab:matlab.internal.language.introspective.errorDocCallback('nchoosek', 'D:\Program Files\MATLAB\R2017a\toolbox\matlab\specfun\nchoosek.m', 92)" style="font-weight:bold">nchoosek</a> (<a href="matlab: opentoline('D:\Program Files\MATLAB\R2017a\toolbox\matlab\specfun\nchoosek.m',92,0)">line 92</a>)
  In <a href="matlab:matlab.internal.language.introspective.errorDocCallback('DDE_algo_main', 'E:\Ñ§Êõ\ÎÄÏ×¿â\ÅçÈªÂëÏà¹Ø\20180404ÅçÈªÂë17ÄêÒÔºó\2018-Analysis and Design of Physical Layer Raptor Codes\³ÌÐò\ÀëÉ¢ÃÜ¶È½ø»¯»ñÈ¡ÃÅÏÞÖµ\DDE_algo_main.m', 82)" style="font-weight:bold">DDE_algo_main</a> (<a href="matlab: opentoline('E:\Ñ§Êõ\ÎÄÏ×¿â\ÅçÈªÂëÏà¹Ø\20180404ÅçÈªÂë17ÄêÒÔºó\2018-Analysis and Design of Physical Layer Raptor Codes\³ÌÐò\ÀëÉ¢ÃÜ¶È½ø»¯»ñÈ¡ÃÅÏÞÖµ\DDE_algo_main.m',82,0)">line 82</a>)] 
[Warning: Result may not be exact. Coefficient is greater than 9.007199e+15 and is only accurate to 15 digits] 
[> In <a href="matlab:matlab.internal.language.introspective.errorDocCallback('nchoosek', 'D:\Program Files\MATLAB\R2017a\toolbox\matlab\specfun\nchoosek.m', 92)" style="font-weight:bold">nchoosek</a> (<a href="matlab: opentoline('D:\Program Files\MATLAB\R2017a\toolbox\matlab\specfun\nchoosek.m',92,0)">line 92</a>)
  In <a href="matlab:matlab.internal.language.introspective.errorDocCallback('DDE_algo_main', 'E:\Ñ§Êõ\ÎÄÏ×¿â\ÅçÈªÂëÏà¹Ø\20180404ÅçÈªÂë17ÄêÒÔºó\2018-Analysis and Design of Physical Layer Raptor Codes\³ÌÐò\ÀëÉ¢ÃÜ¶È½ø»¯»ñÈ¡ÃÅÏÞÖµ\DDE_algo_main.m', 82)" style="font-weight:bold">DDE_algo_main</a> (<a href="matlab: opentoline('E:\Ñ§Êõ\ÎÄÏ×¿â\ÅçÈªÂëÏà¹Ø\20180404ÅçÈªÂë17ÄêÒÔºó\2018-Analysis and Design of Physical Layer Raptor Codes\³ÌÐò\ÀëÉ¢ÃÜ¶È½ø»¯»ñÈ¡ÃÅÏÞÖµ\DDE_algo_main.m',82,0)">line 82</a>)] 
[Warning: Result may not be exact. Coefficient is greater than 9.007199e+15 and is only accurate to 15 digits] 
[> In <a href="matlab:matlab.internal.language.introspective.errorDocCallback('nchoosek', 'D:\Program Files\MATLAB\R2017a\toolbox\matlab\specfun\nchoosek.m', 92)" style="font-weight:bold">nchoosek</a> (<a href="matlab: opentoline('D:\Program Files\MATLAB\R2017a\toolbox\matlab\specfun\nchoosek.m',92,0)">line 92</a>)
  In <a href="matlab:matlab.internal.language.introspective.errorDocCallback('DDE_algo_main', 'E:\Ñ§Êõ\ÎÄÏ×¿â\ÅçÈªÂëÏà¹Ø\20180404ÅçÈªÂë17ÄêÒÔºó\2018-Analysis and Design of Physical Layer Raptor Codes\³ÌÐò\ÀëÉ¢ÃÜ¶È½ø»¯»ñÈ¡ÃÅÏÞÖµ\DDE_algo_main.m', 82)" style="font-weight:bold">DDE_algo_main</a> (<a href="matlab: opentoline('E:\Ñ§Êõ\ÎÄÏ×¿â\ÅçÈªÂëÏà¹Ø\20180404ÅçÈªÂë17ÄêÒÔºó\2018-Analysis and Design of Physical Layer Raptor Codes\³ÌÐò\ÀëÉ¢ÃÜ¶È½ø»¯»ñÈ¡ÃÅÏÞÖµ\DDE_algo_main.m',82,0)">line 82</a>)] 
[Warning: Result may not be exact. Coefficient is greater than 9.007199e+15 and is only accurate to 15 digits] 
[> In <a href="matlab:matlab.internal.language.introspective.errorDocCallback('nchoosek', 'D:\Program Files\MATLAB\R2017a\toolbox\matlab\specfun\nchoosek.m', 92)" style="font-weight:bold">nchoosek</a> (<a href="matlab: opentoline('D:\Program Files\MATLAB\R2017a\toolbox\matlab\specfun\nchoosek.m',92,0)">line 92</a>)
  In <a href="matlab:matlab.internal.language.introspective.errorDocCallback('DDE_algo_main', 'E:\Ñ§Êõ\ÎÄÏ×¿â\ÅçÈªÂëÏà¹Ø\20180404ÅçÈªÂë17ÄêÒÔºó\2018-Analysis and Design of Physical Layer Raptor Codes\³ÌÐò\ÀëÉ¢ÃÜ¶È½ø»¯»ñÈ¡ÃÅÏÞÖµ\DDE_algo_main.m', 82)" style="font-weight:bold">DDE_algo_main</a> (<a href="matlab: opentoline('E:\Ñ§Êõ\ÎÄÏ×¿â\ÅçÈªÂëÏà¹Ø\20180404ÅçÈªÂë17ÄêÒÔºó\2018-Analysis and Design of Physical Layer Raptor Codes\³ÌÐò\ÀëÉ¢ÃÜ¶È½ø»¯»ñÈ¡ÃÅÏÞÖµ\DDE_algo_main.m',82,0)">line 82</a>)] 
[Warning: Result may not be exact. Coefficient is greater than 9.007199e+15 and is only accurate to 15 digits] 
[> In <a href="matlab:matlab.internal.language.introspective.errorDocCallback('nchoosek', 'D:\Program Files\MATLAB\R2017a\toolbox\matlab\specfun\nchoosek.m', 92)" style="font-weight:bold">nchoosek</a> (<a href="matlab: opentoline('D:\Program Files\MATLAB\R2017a\toolbox\matlab\specfun\nchoosek.m',92,0)">line 92</a>)
  In <a href="matlab:matlab.internal.language.introspective.errorDocCallback('DDE_algo_main', 'E:\Ñ§Êõ\ÎÄÏ×¿â\ÅçÈªÂëÏà¹Ø\20180404ÅçÈªÂë17ÄêÒÔºó\2018-Analysis and Design of Physical Layer Raptor Codes\³ÌÐò\ÀëÉ¢ÃÜ¶È½ø»¯»ñÈ¡ÃÅÏÞÖµ\DDE_algo_main.m', 82)" style="font-weight:bold">DDE_algo_main</a> (<a href="matlab: opentoline('E:\Ñ§Êõ\ÎÄÏ×¿â\ÅçÈªÂëÏà¹Ø\20180404ÅçÈªÂë17ÄêÒÔºó\2018-Analysis and Design of Physical Layer Raptor Codes\³ÌÐò\ÀëÉ¢ÃÜ¶È½ø»¯»ñÈ¡ÃÅÏÞÖµ\DDE_algo_main.m',82,0)">line 82</a>)] 
[Warning: Result may not be exact. Coefficient is greater than 9.007199e+15 and is only accurate to 15 digits] 
[> In <a href="matlab:matlab.internal.language.introspective.errorDocCallback('nchoosek', 'D:\Program Files\MATLAB\R2017a\toolbox\matlab\specfun\nchoosek.m', 92)" style="font-weight:bold">nchoosek</a> (<a href="matlab: opentoline('D:\Program Files\MATLAB\R2017a\toolbox\matlab\specfun\nchoosek.m',92,0)">line 92</a>)
  In <a href="matlab:matlab.internal.language.introspective.errorDocCallback('DDE_algo_main', 'E:\Ñ§Êõ\ÎÄÏ×¿â\ÅçÈªÂëÏà¹Ø\20180404ÅçÈªÂë17ÄêÒÔºó\2018-Analysis and Design of Physical Layer Raptor Codes\³ÌÐò\ÀëÉ¢ÃÜ¶È½ø»¯»ñÈ¡ÃÅÏÞÖµ\DDE_algo_main.m', 82)" style="font-weight:bold">DDE_algo_main</a> (<a href="matlab: opentoline('E:\Ñ§Êõ\ÎÄÏ×¿â\ÅçÈªÂëÏà¹Ø\20180404ÅçÈªÂë17ÄêÒÔºó\2018-Analysis and Design of Physical Layer Raptor Codes\³ÌÐò\ÀëÉ¢ÃÜ¶È½ø»¯»ñÈ¡ÃÅÏÞÖµ\DDE_algo_main.m',82,0)">line 82</a>)] 
[Warning: Result may not be exact. Coefficient is greater than 9.007199e+15 and is only accurate to 15 digits] 
[> In <a href="matlab:matlab.internal.language.introspective.errorDocCallback('nchoosek', 'D:\Program Files\MATLAB\R2017a\toolbox\matlab\specfun\nchoosek.m', 92)" style="font-weight:bold">nchoosek</a> (<a href="matlab: opentoline('D:\Program Files\MATLAB\R2017a\toolbox\matlab\specfun\nchoosek.m',92,0)">line 92</a>)
  In <a href="matlab:matlab.internal.language.introspective.errorDocCallback('DDE_algo_main', 'E:\Ñ§Êõ\ÎÄÏ×¿â\ÅçÈªÂëÏà¹Ø\20180404ÅçÈªÂë17ÄêÒÔºó\2018-Analysis and Design of Physical Layer Raptor Codes\³ÌÐò\ÀëÉ¢ÃÜ¶È½ø»¯»ñÈ¡ÃÅÏÞÖµ\DDE_algo_main.m', 82)" style="font-weight:bold">DDE_algo_main</a> (<a href="matlab: opentoline('E:\Ñ§Êõ\ÎÄÏ×¿â\ÅçÈªÂëÏà¹Ø\20180404ÅçÈªÂë17ÄêÒÔºó\2018-Analysis and Design of Physical Layer Raptor Codes\³ÌÐò\ÀëÉ¢ÃÜ¶È½ø»¯»ñÈ¡ÃÅÏÞÖµ\DDE_algo_main.m',82,0)">line 82</a>)] 
[Warning: Result may not be exact. Coefficient is greater than 9.007199e+15 and is only accurate to 15 digits] 
[> In <a href="matlab:matlab.internal.language.introspective.errorDocCallback('nchoosek', 'D:\Program Files\MATLAB\R2017a\toolbox\matlab\specfun\nchoosek.m', 92)" style="font-weight:bold">nchoosek</a> (<a href="matlab: opentoline('D:\Program Files\MATLAB\R2017a\toolbox\matlab\specfun\nchoosek.m',92,0)">line 92</a>)
  In <a href="matlab:matlab.internal.language.introspective.errorDocCallback('DDE_algo_main', 'E:\Ñ§Êõ\ÎÄÏ×¿â\ÅçÈªÂëÏà¹Ø\20180404ÅçÈªÂë17ÄêÒÔºó\2018-Analysis and Design of Physical Layer Raptor Codes\³ÌÐò\ÀëÉ¢ÃÜ¶È½ø»¯»ñÈ¡ÃÅÏÞÖµ\DDE_algo_main.m', 82)" style="font-weight:bold">DDE_algo_main</a> (<a href="matlab: opentoline('E:\Ñ§Êõ\ÎÄÏ×¿â\ÅçÈªÂëÏà¹Ø\20180404ÅçÈªÂë17ÄêÒÔºó\2018-Analysis and Design of Physical Layer Raptor Codes\³ÌÐò\ÀëÉ¢ÃÜ¶È½ø»¯»ñÈ¡ÃÅÏÞÖµ\DDE_algo_main.m',82,0)">line 82</a>)] 
[Warning: Result may not be exact. Coefficient is greater than 9.007199e+15 and is only accurate to 15 digits] 
[> In <a href="matlab:matlab.internal.language.introspective.errorDocCallback('nchoosek', 'D:\Program Files\MATLAB\R2017a\toolbox\matlab\specfun\nchoosek.m', 92)" style="font-weight:bold">nchoosek</a> (<a href="matlab: opentoline('D:\Program Files\MATLAB\R2017a\toolbox\matlab\specfun\nchoosek.m',92,0)">line 92</a>)
  In <a href="matlab:matlab.internal.language.introspective.errorDocCallback('DDE_algo_main', 'E:\Ñ§Êõ\ÎÄÏ×¿â\ÅçÈªÂëÏà¹Ø\20180404ÅçÈªÂë17ÄêÒÔºó\2018-Analysis and Design of Physical Layer Raptor Codes\³ÌÐò\ÀëÉ¢ÃÜ¶È½ø»¯»ñÈ¡ÃÅÏÞÖµ\DDE_algo_main.m', 82)" style="font-weight:bold">DDE_algo_main</a> (<a href="matlab: opentoline('E:\Ñ§Êõ\ÎÄÏ×¿â\ÅçÈªÂëÏà¹Ø\20180404ÅçÈªÂë17ÄêÒÔºó\2018-Analysis and Design of Physical Layer Raptor Codes\³ÌÐò\ÀëÉ¢ÃÜ¶È½ø»¯»ñÈ¡ÃÅÏÞÖµ\DDE_algo_main.m',82,0)">line 82</a>)] 
[Warning: Result may not be exact. Coefficient is greater than 9.007199e+15 and is only accurate to 15 digits] 
[> In <a href="matlab:matlab.internal.language.introspective.errorDocCallback('nchoosek', 'D:\Program Files\MATLAB\R2017a\toolbox\matlab\specfun\nchoosek.m', 92)" style="font-weight:bold">nchoosek</a> (<a href="matlab: opentoline('D:\Program Files\MATLAB\R2017a\toolbox\matlab\specfun\nchoosek.m',92,0)">line 92</a>)
  In <a href="matlab:matlab.internal.language.introspective.errorDocCallback('DDE_algo_main', 'E:\Ñ§Êõ\ÎÄÏ×¿â\ÅçÈªÂëÏà¹Ø\20180404ÅçÈªÂë17ÄêÒÔºó\2018-Analysis and Design of Physical Layer Raptor Codes\³ÌÐò\ÀëÉ¢ÃÜ¶È½ø»¯»ñÈ¡ÃÅÏÞÖµ\DDE_algo_main.m', 82)" style="font-weight:bold">DDE_algo_main</a> (<a href="matlab: opentoline('E:\Ñ§Êõ\ÎÄÏ×¿â\ÅçÈªÂëÏà¹Ø\20180404ÅçÈªÂë17ÄêÒÔºó\2018-Analysis and Design of Physical Layer Raptor Codes\³ÌÐò\ÀëÉ¢ÃÜ¶È½ø»¯»ñÈ¡ÃÅÏÞÖµ\DDE_algo_main.m',82,0)">line 82</a>)] 
[Warning: Result may not be exact. Coefficient is greater than 9.007199e+15 and is only accurate to 15 digits] 
[> In <a href="matlab:matlab.internal.language.introspective.errorDocCallback('nchoosek', 'D:\Program Files\MATLAB\R2017a\toolbox\matlab\specfun\nchoosek.m', 92)" style="font-weight:bold">nchoosek</a> (<a href="matlab: opentoline('D:\Program Files\MATLAB\R2017a\toolbox\matlab\specfun\nchoosek.m',92,0)">line 92</a>)
  In <a href="matlab:matlab.internal.language.introspective.errorDocCallback('DDE_algo_main', 'E:\Ñ§Êõ\ÎÄÏ×¿â\ÅçÈªÂëÏà¹Ø\20180404ÅçÈªÂë17ÄêÒÔºó\2018-Analysis and Design of Physical Layer Raptor Codes\³ÌÐò\ÀëÉ¢ÃÜ¶È½ø»¯»ñÈ¡ÃÅÏÞÖµ\DDE_algo_main.m', 82)" style="font-weight:bold">DDE_algo_main</a> (<a href="matlab: opentoline('E:\Ñ§Êõ\ÎÄÏ×¿â\ÅçÈªÂëÏà¹Ø\20180404ÅçÈªÂë17ÄêÒÔºó\2018-Analysis and Design of Physical Layer Raptor Codes\³ÌÐò\ÀëÉ¢ÃÜ¶È½ø»¯»ñÈ¡ÃÅÏÞÖµ\DDE_algo_main.m',82,0)">line 82</a>)] 
[Warning: Result may not be exact. Coefficient is greater than 9.007199e+15 and is only accurate to 15 digits] 
[> In <a href="matlab:matlab.internal.language.introspective.errorDocCallback('nchoosek', 'D:\Program Files\MATLAB\R2017a\toolbox\matlab\specfun\nchoosek.m', 92)" style="font-weight:bold">nchoosek</a> (<a href="matlab: opentoline('D:\Program Files\MATLAB\R2017a\toolbox\matlab\specfun\nchoosek.m',92,0)">line 92</a>)
  In <a href="matlab:matlab.internal.language.introspective.errorDocCallback('DDE_algo_main', 'E:\Ñ§Êõ\ÎÄÏ×¿â\ÅçÈªÂëÏà¹Ø\20180404ÅçÈªÂë17ÄêÒÔºó\2018-Analysis and Design of Physical Layer Raptor Codes\³ÌÐò\ÀëÉ¢ÃÜ¶È½ø»¯»ñÈ¡ÃÅÏÞÖµ\DDE_algo_main.m', 82)" style="font-weight:bold">DDE_algo_main</a> (<a href="matlab: opentoline('E:\Ñ§Êõ\ÎÄÏ×¿â\ÅçÈªÂëÏà¹Ø\20180404ÅçÈªÂë17ÄêÒÔºó\2018-Analysis and Design of Physical Layer Raptor Codes\³ÌÐò\ÀëÉ¢ÃÜ¶È½ø»¯»ñÈ¡ÃÅÏÞÖµ\DDE_algo_main.m',82,0)">line 82</a>)] 
[Warning: Result may not be exact. Coefficient is greater than 9.007199e+15 and is only accurate to 15 digits] 
[> In <a href="matlab:matlab.internal.language.introspective.errorDocCallback('nchoosek', 'D:\Program Files\MATLAB\R2017a\toolbox\matlab\specfun\nchoosek.m', 92)" style="font-weight:bold">nchoosek</a> (<a href="matlab: opentoline('D:\Program Files\MATLAB\R2017a\toolbox\matlab\specfun\nchoosek.m',92,0)">line 92</a>)
  In <a href="matlab:matlab.internal.language.introspective.errorDocCallback('DDE_algo_main', 'E:\Ñ§Êõ\ÎÄÏ×¿â\ÅçÈªÂëÏà¹Ø\20180404ÅçÈªÂë17ÄêÒÔºó\2018-Analysis and Design of Physical Layer Raptor Codes\³ÌÐò\ÀëÉ¢ÃÜ¶È½ø»¯»ñÈ¡ÃÅÏÞÖµ\DDE_algo_main.m', 82)" style="font-weight:bold">DDE_algo_main</a> (<a href="matlab: opentoline('E:\Ñ§Êõ\ÎÄÏ×¿â\ÅçÈªÂëÏà¹Ø\20180404ÅçÈªÂë17ÄêÒÔºó\2018-Analysis and Design of Physical Layer Raptor Codes\³ÌÐò\ÀëÉ¢ÃÜ¶È½ø»¯»ñÈ¡ÃÅÏÞÖµ\DDE_algo_main.m',82,0)">line 82</a>)] 
[Warning: Result may not be exact. Coefficient is greater than 9.007199e+15 and is only accurate to 15 digits] 
[> In <a href="matlab:matlab.internal.language.introspective.errorDocCallback('nchoosek', 'D:\Program Files\MATLAB\R2017a\toolbox\matlab\specfun\nchoosek.m', 92)" style="font-weight:bold">nchoosek</a> (<a href="matlab: opentoline('D:\Program Files\MATLAB\R2017a\toolbox\matlab\specfun\nchoosek.m',92,0)">line 92</a>)
  In <a href="matlab:matlab.internal.language.introspective.errorDocCallback('DDE_algo_main', 'E:\Ñ§Êõ\ÎÄÏ×¿â\ÅçÈªÂëÏà¹Ø\20180404ÅçÈªÂë17ÄêÒÔºó\2018-Analysis and Design of Physical Layer Raptor Codes\³ÌÐò\ÀëÉ¢ÃÜ¶È½ø»¯»ñÈ¡ÃÅÏÞÖµ\DDE_algo_main.m', 82)" style="font-weight:bold">DDE_algo_main</a> (<a href="matlab: opentoline('E:\Ñ§Êõ\ÎÄÏ×¿â\ÅçÈªÂëÏà¹Ø\20180404ÅçÈªÂë17ÄêÒÔºó\2018-Analysis and Design of Physical Layer Raptor Codes\³ÌÐò\ÀëÉ¢ÃÜ¶È½ø»¯»ñÈ¡ÃÅÏÞÖµ\DDE_algo_main.m',82,0)">line 82</a>)] 
[Warning: Result may not be exact. Coefficient is greater than 9.007199e+15 and is only accurate to 15 digits] 
[> In <a href="matlab:matlab.internal.language.introspective.errorDocCallback('nchoosek', 'D:\Program Files\MATLAB\R2017a\toolbox\matlab\specfun\nchoosek.m', 92)" style="font-weight:bold">nchoosek</a> (<a href="matlab: opentoline('D:\Program Files\MATLAB\R2017a\toolbox\matlab\specfun\nchoosek.m',92,0)">line 92</a>)
  In <a href="matlab:matlab.internal.language.introspective.errorDocCallback('DDE_algo_main', 'E:\Ñ§Êõ\ÎÄÏ×¿â\ÅçÈªÂëÏà¹Ø\20180404ÅçÈªÂë17ÄêÒÔºó\2018-Analysis and Design of Physical Layer Raptor Codes\³ÌÐò\ÀëÉ¢ÃÜ¶È½ø»¯»ñÈ¡ÃÅÏÞÖµ\DDE_algo_main.m', 82)" style="font-weight:bold">DDE_algo_main</a> (<a href="matlab: opentoline('E:\Ñ§Êõ\ÎÄÏ×¿â\ÅçÈªÂëÏà¹Ø\20180404ÅçÈªÂë17ÄêÒÔºó\2018-Analysis and Design of Physical Layer Raptor Codes\³ÌÐò\ÀëÉ¢ÃÜ¶È½ø»¯»ñÈ¡ÃÅÏÞÖµ\DDE_algo_main.m',82,0)">line 82</a>)] 
[Warning: Result may not be exact. Coefficient is greater than 9.007199e+15 and is only accurate to 15 digits] 
[> In <a href="matlab:matlab.internal.language.introspective.errorDocCallback('nchoosek', 'D:\Program Files\MATLAB\R2017a\toolbox\matlab\specfun\nchoosek.m', 92)" style="font-weight:bold">nchoosek</a> (<a href="matlab: opentoline('D:\Program Files\MATLAB\R2017a\toolbox\matlab\specfun\nchoosek.m',92,0)">line 92</a>)
  In <a href="matlab:matlab.internal.language.introspective.errorDocCallback('DDE_algo_main', 'E:\Ñ§Êõ\ÎÄÏ×¿â\ÅçÈªÂëÏà¹Ø\20180404ÅçÈªÂë17ÄêÒÔºó\2018-Analysis and Design of Physical Layer Raptor Codes\³ÌÐò\ÀëÉ¢ÃÜ¶È½ø»¯»ñÈ¡ÃÅÏÞÖµ\DDE_algo_main.m', 82)" style="font-weight:bold">DDE_algo_main</a> (<a href="matlab: opentoline('E:\Ñ§Êõ\ÎÄÏ×¿â\ÅçÈªÂëÏà¹Ø\20180404ÅçÈªÂë17ÄêÒÔºó\2018-Analysis and Design of Physical Layer Raptor Codes\³ÌÐò\ÀëÉ¢ÃÜ¶È½ø»¯»ñÈ¡ÃÅÏÞÖµ\DDE_algo_main.m',82,0)">line 82</a>)] 
[Warning: Result may not be exact. Coefficient is greater than 9.007199e+15 and is only accurate to 15 digits] 
[> In <a href="matlab:matlab.internal.language.introspective.errorDocCallback('nchoosek', 'D:\Program Files\MATLAB\R2017a\toolbox\matlab\specfun\nchoosek.m', 92)" style="font-weight:bold">nchoosek</a> (<a href="matlab: opentoline('D:\Program Files\MATLAB\R2017a\toolbox\matlab\specfun\nchoosek.m',92,0)">line 92</a>)
  In <a href="matlab:matlab.internal.language.introspective.errorDocCallback('DDE_algo_main', 'E:\Ñ§Êõ\ÎÄÏ×¿â\ÅçÈªÂëÏà¹Ø\20180404ÅçÈªÂë17ÄêÒÔºó\2018-Analysis and Design of Physical Layer Raptor Codes\³ÌÐò\ÀëÉ¢ÃÜ¶È½ø»¯»ñÈ¡ÃÅÏÞÖµ\DDE_algo_main.m', 82)" style="font-weight:bold">DDE_algo_main</a> (<a href="matlab: opentoline('E:\Ñ§Êõ\ÎÄÏ×¿â\ÅçÈªÂëÏà¹Ø\20180404ÅçÈªÂë17ÄêÒÔºó\2018-Analysis and Design of Physical Layer Raptor Codes\³ÌÐò\ÀëÉ¢ÃÜ¶È½ø»¯»ñÈ¡ÃÅÏÞÖµ\DDE_algo_main.m',82,0)">line 82</a>)] 
[Warning: Result may not be exact. Coefficient is greater than 9.007199e+15 and is only accurate to 15 digits] 
[> In <a href="matlab:matlab.internal.language.introspective.errorDocCallback('nchoosek', 'D:\Program Files\MATLAB\R2017a\toolbox\matlab\specfun\nchoosek.m', 92)" style="font-weight:bold">nchoosek</a> (<a href="matlab: opentoline('D:\Program Files\MATLAB\R2017a\toolbox\matlab\specfun\nchoosek.m',92,0)">line 92</a>)
  In <a href="matlab:matlab.internal.language.introspective.errorDocCallback('DDE_algo_main', 'E:\Ñ§Êõ\ÎÄÏ×¿â\ÅçÈªÂëÏà¹Ø\20180404ÅçÈªÂë17ÄêÒÔºó\2018-Analysis and Design of Physical Layer Raptor Codes\³ÌÐò\ÀëÉ¢ÃÜ¶È½ø»¯»ñÈ¡ÃÅÏÞÖµ\DDE_algo_main.m', 82)" style="font-weight:bold">DDE_algo_main</a> (<a href="matlab: opentoline('E:\Ñ§Êõ\ÎÄÏ×¿â\ÅçÈªÂëÏà¹Ø\20180404ÅçÈªÂë17ÄêÒÔºó\2018-Analysis and Design of Physical Layer Raptor Codes\³ÌÐò\ÀëÉ¢ÃÜ¶È½ø»¯»ñÈ¡ÃÅÏÞÖµ\DDE_algo_main.m',82,0)">line 82</a>)] 
[Warning: Result may not be exact. Coefficient is greater than 9.007199e+15 and is only accurate to 15 digits] 
[> In <a href="matlab:matlab.internal.language.introspective.errorDocCallback('nchoosek', 'D:\Program Files\MATLAB\R2017a\toolbox\matlab\specfun\nchoosek.m', 92)" style="font-weight:bold">nchoosek</a> (<a href="matlab: opentoline('D:\Program Files\MATLAB\R2017a\toolbox\matlab\specfun\nchoosek.m',92,0)">line 92</a>)
  In <a href="matlab:matlab.internal.language.introspective.errorDocCallback('DDE_algo_main', 'E:\Ñ§Êõ\ÎÄÏ×¿â\ÅçÈªÂëÏà¹Ø\20180404ÅçÈªÂë17ÄêÒÔºó\2018-Analysis and Design of Physical Layer Raptor Codes\³ÌÐò\ÀëÉ¢ÃÜ¶È½ø»¯»ñÈ¡ÃÅÏÞÖµ\DDE_algo_main.m', 82)" style="font-weight:bold">DDE_algo_main</a> (<a href="matlab: opentoline('E:\Ñ§Êõ\ÎÄÏ×¿â\ÅçÈªÂëÏà¹Ø\20180404ÅçÈªÂë17ÄêÒÔºó\2018-Analysis and Design of Physical Layer Raptor Codes\³ÌÐò\ÀëÉ¢ÃÜ¶È½ø»¯»ñÈ¡ÃÅÏÞÖµ\DDE_algo_main.m',82,0)">line 82</a>)] 
[Warning: Result may not be exact. Coefficient is greater than 9.007199e+15 and is only accurate to 15 digits] 
[> In <a href="matlab:matlab.internal.language.introspective.errorDocCallback('nchoosek', 'D:\Program Files\MATLAB\R2017a\toolbox\matlab\specfun\nchoosek.m', 92)" style="font-weight:bold">nchoosek</a> (<a href="matlab: opentoline('D:\Program Files\MATLAB\R2017a\toolbox\matlab\specfun\nchoosek.m',92,0)">line 92</a>)
  In <a href="matlab:matlab.internal.language.introspective.errorDocCallback('DDE_algo_main', 'E:\Ñ§Êõ\ÎÄÏ×¿â\ÅçÈªÂëÏà¹Ø\20180404ÅçÈªÂë17ÄêÒÔºó\2018-Analysis and Design of Physical Layer Raptor Codes\³ÌÐò\ÀëÉ¢ÃÜ¶È½ø»¯»ñÈ¡ÃÅÏÞÖµ\DDE_algo_main.m', 82)" style="font-weight:bold">DDE_algo_main</a> (<a href="matlab: opentoline('E:\Ñ§Êõ\ÎÄÏ×¿â\ÅçÈªÂëÏà¹Ø\20180404ÅçÈªÂë17ÄêÒÔºó\2018-Analysis and Design of Physical Layer Raptor Codes\³ÌÐò\ÀëÉ¢ÃÜ¶È½ø»¯»ñÈ¡ÃÅÏÞÖµ\DDE_algo_main.m',82,0)">line 82</a>)] 
[Warning: Result may not be exact. Coefficient is greater than 9.007199e+15 and is only accurate to 15 digits] 
[> In <a href="matlab:matlab.internal.language.introspective.errorDocCallback('nchoosek', 'D:\Program Files\MATLAB\R2017a\toolbox\matlab\specfun\nchoosek.m', 92)" style="font-weight:bold">nchoosek</a> (<a href="matlab: opentoline('D:\Program Files\MATLAB\R2017a\toolbox\matlab\specfun\nchoosek.m',92,0)">line 92</a>)
  In <a href="matlab:matlab.internal.language.introspective.errorDocCallback('DDE_algo_main', 'E:\Ñ§Êõ\ÎÄÏ×¿â\ÅçÈªÂëÏà¹Ø\20180404ÅçÈªÂë17ÄêÒÔºó\2018-Analysis and Design of Physical Layer Raptor Codes\³ÌÐò\ÀëÉ¢ÃÜ¶È½ø»¯»ñÈ¡ÃÅÏÞÖµ\DDE_algo_main.m', 82)" style="font-weight:bold">DDE_algo_main</a> (<a href="matlab: opentoline('E:\Ñ§Êõ\ÎÄÏ×¿â\ÅçÈªÂëÏà¹Ø\20180404ÅçÈªÂë17ÄêÒÔºó\2018-Analysis and Design of Physical Layer Raptor Codes\³ÌÐò\ÀëÉ¢ÃÜ¶È½ø»¯»ñÈ¡ÃÅÏÞÖµ\DDE_algo_main.m',82,0)">line 82</a>)] 
[Warning: Result may not be exact. Coefficient is greater than 9.007199e+15 and is only accurate to 15 digits] 
[> In <a href="matlab:matlab.internal.language.introspective.errorDocCallback('nchoosek', 'D:\Program Files\MATLAB\R2017a\toolbox\matlab\specfun\nchoosek.m', 92)" style="font-weight:bold">nchoosek</a> (<a href="matlab: opentoline('D:\Program Files\MATLAB\R2017a\toolbox\matlab\specfun\nchoosek.m',92,0)">line 92</a>)
  In <a href="matlab:matlab.internal.language.introspective.errorDocCallback('DDE_algo_main', 'E:\Ñ§Êõ\ÎÄÏ×¿â\ÅçÈªÂëÏà¹Ø\20180404ÅçÈªÂë17ÄêÒÔºó\2018-Analysis and Design of Physical Layer Raptor Codes\³ÌÐò\ÀëÉ¢ÃÜ¶È½ø»¯»ñÈ¡ÃÅÏÞÖµ\DDE_algo_main.m', 82)" style="font-weight:bold">DDE_algo_main</a> (<a href="matlab: opentoline('E:\Ñ§Êõ\ÎÄÏ×¿â\ÅçÈªÂëÏà¹Ø\20180404ÅçÈªÂë17ÄêÒÔºó\2018-Analysis and Design of Physical Layer Raptor Codes\³ÌÐò\ÀëÉ¢ÃÜ¶È½ø»¯»ñÈ¡ÃÅÏÞÖµ\DDE_algo_main.m',82,0)">line 82</a>)] 
[Warning: Result may not be exact. Coefficient is greater than 9.007199e+15 and is only accurate to 15 digits] 
[> In <a href="matlab:matlab.internal.language.introspective.errorDocCallback('nchoosek', 'D:\Program Files\MATLAB\R2017a\toolbox\matlab\specfun\nchoosek.m', 92)" style="font-weight:bold">nchoosek</a> (<a href="matlab: opentoline('D:\Program Files\MATLAB\R2017a\toolbox\matlab\specfun\nchoosek.m',92,0)">line 92</a>)
  In <a href="matlab:matlab.internal.language.introspective.errorDocCallback('DDE_algo_main', 'E:\Ñ§Êõ\ÎÄÏ×¿â\ÅçÈªÂëÏà¹Ø\20180404ÅçÈªÂë17ÄêÒÔºó\2018-Analysis and Design of Physical Layer Raptor Codes\³ÌÐò\ÀëÉ¢ÃÜ¶È½ø»¯»ñÈ¡ÃÅÏÞÖµ\DDE_algo_main.m', 82)" style="font-weight:bold">DDE_algo_main</a> (<a href="matlab: opentoline('E:\Ñ§Êõ\ÎÄÏ×¿â\ÅçÈªÂëÏà¹Ø\20180404ÅçÈªÂë17ÄêÒÔºó\2018-Analysis and Design of Physical Layer Raptor Codes\³ÌÐò\ÀëÉ¢ÃÜ¶È½ø»¯»ñÈ¡ÃÅÏÞÖµ\DDE_algo_main.m',82,0)">line 82</a>)] 
[Warning: Result may not be exact. Coefficient is greater than 9.007199e+15 and is only accurate to 15 digits] 
[> In <a href="matlab:matlab.internal.language.introspective.errorDocCallback('nchoosek', 'D:\Program Files\MATLAB\R2017a\toolbox\matlab\specfun\nchoosek.m', 92)" style="font-weight:bold">nchoosek</a> (<a href="matlab: opentoline('D:\Program Files\MATLAB\R2017a\toolbox\matlab\specfun\nchoosek.m',92,0)">line 92</a>)
  In <a href="matlab:matlab.internal.language.introspective.errorDocCallback('DDE_algo_main', 'E:\Ñ§Êõ\ÎÄÏ×¿â\ÅçÈªÂëÏà¹Ø\20180404ÅçÈªÂë17ÄêÒÔºó\2018-Analysis and Design of Physical Layer Raptor Codes\³ÌÐò\ÀëÉ¢ÃÜ¶È½ø»¯»ñÈ¡ÃÅÏÞÖµ\DDE_algo_main.m', 82)" style="font-weight:bold">DDE_algo_main</a> (<a href="matlab: opentoline('E:\Ñ§Êõ\ÎÄÏ×¿â\ÅçÈªÂëÏà¹Ø\20180404ÅçÈªÂë17ÄêÒÔºó\2018-Analysis and Design of Physical Layer Raptor Codes\³ÌÐò\ÀëÉ¢ÃÜ¶È½ø»¯»ñÈ¡ÃÅÏÞÖµ\DDE_algo_main.m',82,0)">line 82</a>)] 
[Warning: Result may not be exact. Coefficient is greater than 9.007199e+15 and is only accurate to 15 digits] 
[> In <a href="matlab:matlab.internal.language.introspective.errorDocCallback('nchoosek', 'D:\Program Files\MATLAB\R2017a\toolbox\matlab\specfun\nchoosek.m', 92)" style="font-weight:bold">nchoosek</a> (<a href="matlab: opentoline('D:\Program Files\MATLAB\R2017a\toolbox\matlab\specfun\nchoosek.m',92,0)">line 92</a>)
  In <a href="matlab:matlab.internal.language.introspective.errorDocCallback('DDE_algo_main', 'E:\Ñ§Êõ\ÎÄÏ×¿â\ÅçÈªÂëÏà¹Ø\20180404ÅçÈªÂë17ÄêÒÔºó\2018-Analysis and Design of Physical Layer Raptor Codes\³ÌÐò\ÀëÉ¢ÃÜ¶È½ø»¯»ñÈ¡ÃÅÏÞÖµ\DDE_algo_main.m', 82)" style="font-weight:bold">DDE_algo_main</a> (<a href="matlab: opentoline('E:\Ñ§Êõ\ÎÄÏ×¿â\ÅçÈªÂëÏà¹Ø\20180404ÅçÈªÂë17ÄêÒÔºó\2018-Analysis and Design of Physical Layer Raptor Codes\³ÌÐò\ÀëÉ¢ÃÜ¶È½ø»¯»ñÈ¡ÃÅÏÞÖµ\DDE_algo_main.m',82,0)">line 82</a>)] 
[Warning: Result may not be exact. Coefficient is greater than 9.007199e+15 and is only accurate to 15 digits] 
[> In <a href="matlab:matlab.internal.language.introspective.errorDocCallback('nchoosek', 'D:\Program Files\MATLAB\R2017a\toolbox\matlab\specfun\nchoosek.m', 92)" style="font-weight:bold">nchoosek</a> (<a href="matlab: opentoline('D:\Program Files\MATLAB\R2017a\toolbox\matlab\specfun\nchoosek.m',92,0)">line 92</a>)
  In <a href="matlab:matlab.internal.language.introspective.errorDocCallback('DDE_algo_main', 'E:\Ñ§Êõ\ÎÄÏ×¿â\ÅçÈªÂëÏà¹Ø\20180404ÅçÈªÂë17ÄêÒÔºó\2018-Analysis and Design of Physical Layer Raptor Codes\³ÌÐò\ÀëÉ¢ÃÜ¶È½ø»¯»ñÈ¡ÃÅÏÞÖµ\DDE_algo_main.m', 82)" style="font-weight:bold">DDE_algo_main</a> (<a href="matlab: opentoline('E:\Ñ§Êõ\ÎÄÏ×¿â\ÅçÈªÂëÏà¹Ø\20180404ÅçÈªÂë17ÄêÒÔºó\2018-Analysis and Design of Physical Layer Raptor Codes\³ÌÐò\ÀëÉ¢ÃÜ¶È½ø»¯»ñÈ¡ÃÅÏÞÖµ\DDE_algo_main.m',82,0)">line 82</a>)] 
[Warning: Result may not be exact. Coefficient is greater than 9.007199e+15 and is only accurate to 15 digits] 
[> In <a href="matlab:matlab.internal.language.introspective.errorDocCallback('nchoosek', 'D:\Program Files\MATLAB\R2017a\toolbox\matlab\specfun\nchoosek.m', 92)" style="font-weight:bold">nchoosek</a> (<a href="matlab: opentoline('D:\Program Files\MATLAB\R2017a\toolbox\matlab\specfun\nchoosek.m',92,0)">line 92</a>)
  In <a href="matlab:matlab.internal.language.introspective.errorDocCallback('DDE_algo_main', 'E:\Ñ§Êõ\ÎÄÏ×¿â\ÅçÈªÂëÏà¹Ø\20180404ÅçÈªÂë17ÄêÒÔºó\2018-Analysis and Design of Physical Layer Raptor Codes\³ÌÐò\ÀëÉ¢ÃÜ¶È½ø»¯»ñÈ¡ÃÅÏÞÖµ\DDE_algo_main.m', 82)" style="font-weight:bold">DDE_algo_main</a> (<a href="matlab: opentoline('E:\Ñ§Êõ\ÎÄÏ×¿â\ÅçÈªÂëÏà¹Ø\20180404ÅçÈªÂë17ÄêÒÔºó\2018-Analysis and Design of Physical Layer Raptor Codes\³ÌÐò\ÀëÉ¢ÃÜ¶È½ø»¯»ñÈ¡ÃÅÏÞÖµ\DDE_algo_main.m',82,0)">line 82</a>)] 
[Warning: Result may not be exact. Coefficient is greater than 9.007199e+15 and is only accurate to 15 digits] 
[> In <a href="matlab:matlab.internal.language.introspective.errorDocCallback('nchoosek', 'D:\Program Files\MATLAB\R2017a\toolbox\matlab\specfun\nchoosek.m', 92)" style="font-weight:bold">nchoosek</a> (<a href="matlab: opentoline('D:\Program Files\MATLAB\R2017a\toolbox\matlab\specfun\nchoosek.m',92,0)">line 92</a>)
  In <a href="matlab:matlab.internal.language.introspective.errorDocCallback('DDE_algo_main', 'E:\Ñ§Êõ\ÎÄÏ×¿â\ÅçÈªÂëÏà¹Ø\20180404ÅçÈªÂë17ÄêÒÔºó\2018-Analysis and Design of Physical Layer Raptor Codes\³ÌÐò\ÀëÉ¢ÃÜ¶È½ø»¯»ñÈ¡ÃÅÏÞÖµ\DDE_algo_main.m', 82)" style="font-weight:bold">DDE_algo_main</a> (<a href="matlab: opentoline('E:\Ñ§Êõ\ÎÄÏ×¿â\ÅçÈªÂëÏà¹Ø\20180404ÅçÈªÂë17ÄêÒÔºó\2018-Analysis and Design of Physical Layer Raptor Codes\³ÌÐò\ÀëÉ¢ÃÜ¶È½ø»¯»ñÈ¡ÃÅÏÞÖµ\DDE_algo_main.m',82,0)">line 82</a>)] 
[Warning: Result may not be exact. Coefficient is greater than 9.007199e+15 and is only accurate to 15 digits] 
[> In <a href="matlab:matlab.internal.language.introspective.errorDocCallback('nchoosek', 'D:\Program Files\MATLAB\R2017a\toolbox\matlab\specfun\nchoosek.m', 92)" style="font-weight:bold">nchoosek</a> (<a href="matlab: opentoline('D:\Program Files\MATLAB\R2017a\toolbox\matlab\specfun\nchoosek.m',92,0)">line 92</a>)
  In <a href="matlab:matlab.internal.language.introspective.errorDocCallback('DDE_algo_main', 'E:\Ñ§Êõ\ÎÄÏ×¿â\ÅçÈªÂëÏà¹Ø\20180404ÅçÈªÂë17ÄêÒÔºó\2018-Analysis and Design of Physical Layer Raptor Codes\³ÌÐò\ÀëÉ¢ÃÜ¶È½ø»¯»ñÈ¡ÃÅÏÞÖµ\DDE_algo_main.m', 82)" style="font-weight:bold">DDE_algo_main</a> (<a href="matlab: opentoline('E:\Ñ§Êõ\ÎÄÏ×¿â\ÅçÈªÂëÏà¹Ø\20180404ÅçÈªÂë17ÄêÒÔºó\2018-Analysis and Design of Physical Layer Raptor Codes\³ÌÐò\ÀëÉ¢ÃÜ¶È½ø»¯»ñÈ¡ÃÅÏÞÖµ\DDE_algo_main.m',82,0)">line 82</a>)] 
[Warning: Result may not be exact. Coefficient is greater than 9.007199e+15 and is only accurate to 15 digits] 
[> In <a href="matlab:matlab.internal.language.introspective.errorDocCallback('nchoosek', 'D:\Program Files\MATLAB\R2017a\toolbox\matlab\specfun\nchoosek.m', 92)" style="font-weight:bold">nchoosek</a> (<a href="matlab: opentoline('D:\Program Files\MATLAB\R2017a\toolbox\matlab\specfun\nchoosek.m',92,0)">line 92</a>)
  In <a href="matlab:matlab.internal.language.introspective.errorDocCallback('DDE_algo_main', 'E:\Ñ§Êõ\ÎÄÏ×¿â\ÅçÈªÂëÏà¹Ø\20180404ÅçÈªÂë17ÄêÒÔºó\2018-Analysis and Design of Physical Layer Raptor Codes\³ÌÐò\ÀëÉ¢ÃÜ¶È½ø»¯»ñÈ¡ÃÅÏÞÖµ\DDE_algo_main.m', 82)" style="font-weight:bold">DDE_algo_main</a> (<a href="matlab: opentoline('E:\Ñ§Êõ\ÎÄÏ×¿â\ÅçÈªÂëÏà¹Ø\20180404ÅçÈªÂë17ÄêÒÔºó\2018-Analysis and Design of Physical Layer Raptor Codes\³ÌÐò\ÀëÉ¢ÃÜ¶È½ø»¯»ñÈ¡ÃÅÏÞÖµ\DDE_algo_main.m',82,0)">line 82</a>)] 
[Warning: Result may not be exact. Coefficient is greater than 9.007199e+15 and is only accurate to 15 digits] 
[> In <a href="matlab:matlab.internal.language.introspective.errorDocCallback('nchoosek', 'D:\Program Files\MATLAB\R2017a\toolbox\matlab\specfun\nchoosek.m', 92)" style="font-weight:bold">nchoosek</a> (<a href="matlab: opentoline('D:\Program Files\MATLAB\R2017a\toolbox\matlab\specfun\nchoosek.m',92,0)">line 92</a>)
  In <a href="matlab:matlab.internal.language.introspective.errorDocCallback('DDE_algo_main', 'E:\Ñ§Êõ\ÎÄÏ×¿â\ÅçÈªÂëÏà¹Ø\20180404ÅçÈªÂë17ÄêÒÔºó\2018-Analysis and Design of Physical Layer Raptor Codes\³ÌÐò\ÀëÉ¢ÃÜ¶È½ø»¯»ñÈ¡ÃÅÏÞÖµ\DDE_algo_main.m', 82)" style="font-weight:bold">DDE_algo_main</a> (<a href="matlab: opentoline('E:\Ñ§Êõ\ÎÄÏ×¿â\ÅçÈªÂëÏà¹Ø\20180404ÅçÈªÂë17ÄêÒÔºó\2018-Analysis and Design of Physical Layer Raptor Codes\³ÌÐò\ÀëÉ¢ÃÜ¶È½ø»¯»ñÈ¡ÃÅÏÞÖµ\DDE_algo_main.m',82,0)">line 82</a>)] 
[Warning: Result may not be exact. Coefficient is greater than 9.007199e+15 and is only accurate to 15 digits] 
[> In <a href="matlab:matlab.internal.language.introspective.errorDocCallback('nchoosek', 'D:\Program Files\MATLAB\R2017a\toolbox\matlab\specfun\nchoosek.m', 92)" style="font-weight:bold">nchoosek</a> (<a href="matlab: opentoline('D:\Program Files\MATLAB\R2017a\toolbox\matlab\specfun\nchoosek.m',92,0)">line 92</a>)
  In <a href="matlab:matlab.internal.language.introspective.errorDocCallback('DDE_algo_main', 'E:\Ñ§Êõ\ÎÄÏ×¿â\ÅçÈªÂëÏà¹Ø\20180404ÅçÈªÂë17ÄêÒÔºó\2018-Analysis and Design of Physical Layer Raptor Codes\³ÌÐò\ÀëÉ¢ÃÜ¶È½ø»¯»ñÈ¡ÃÅÏÞÖµ\DDE_algo_main.m', 82)" style="font-weight:bold">DDE_algo_main</a> (<a href="matlab: opentoline('E:\Ñ§Êõ\ÎÄÏ×¿â\ÅçÈªÂëÏà¹Ø\20180404ÅçÈªÂë17ÄêÒÔºó\2018-Analysis and Design of Physical Layer Raptor Codes\³ÌÐò\ÀëÉ¢ÃÜ¶È½ø»¯»ñÈ¡ÃÅÏÞÖµ\DDE_algo_main.m',82,0)">line 82</a>)] 
[Warning: Result may not be exact. Coefficient is greater than 9.007199e+15 and is only accurate to 15 digits] 
[> In <a href="matlab:matlab.internal.language.introspective.errorDocCallback('nchoosek', 'D:\Program Files\MATLAB\R2017a\toolbox\matlab\specfun\nchoosek.m', 92)" style="font-weight:bold">nchoosek</a> (<a href="matlab: opentoline('D:\Program Files\MATLAB\R2017a\toolbox\matlab\specfun\nchoosek.m',92,0)">line 92</a>)
  In <a href="matlab:matlab.internal.language.introspective.errorDocCallback('DDE_algo_main', 'E:\Ñ§Êõ\ÎÄÏ×¿â\ÅçÈªÂëÏà¹Ø\20180404ÅçÈªÂë17ÄêÒÔºó\2018-Analysis and Design of Physical Layer Raptor Codes\³ÌÐò\ÀëÉ¢ÃÜ¶È½ø»¯»ñÈ¡ÃÅÏÞÖµ\DDE_algo_main.m', 82)" style="font-weight:bold">DDE_algo_main</a> (<a href="matlab: opentoline('E:\Ñ§Êõ\ÎÄÏ×¿â\ÅçÈªÂëÏà¹Ø\20180404ÅçÈªÂë17ÄêÒÔºó\2018-Analysis and Design of Physical Layer Raptor Codes\³ÌÐò\ÀëÉ¢ÃÜ¶È½ø»¯»ñÈ¡ÃÅÏÞÖµ\DDE_algo_main.m',82,0)">line 82</a>)] 

BER =

  Columns 1 through 5

   0.265571322115275                   0                   0                   0                   0

  Columns 6 through 10

                   0                   0                   0                   0                   0

  Columns 11 through 15

                   0                   0                   0                   0                   0

  Columns 16 through 20

                   0                   0                   0                   0                   0

  Columns 21 through 25

                   0                   0                   0                   0                   0

  Columns 26 through 30

                   0                   0                   0                   0                   0

  Column 31

                   0


BER =

  Columns 1 through 5

   0.265571322115275   0.233903961373744                   0                   0                   0

  Columns 6 through 10

                   0                   0                   0                   0                   0

  Columns 11 through 15

                   0                   0                   0                   0                   0

  Columns 16 through 20

                   0                   0                   0                   0                   0

  Columns 21 through 25

                   0                   0                   0                   0                   0

  Columns 26 through 30

                   0                   0                   0                   0                   0

  Column 31

                   0


BER =

  Columns 1 through 5

   0.265571322115275   0.233903961373744   0.200337441541974                   0                   0

  Columns 6 through 10

                   0                   0                   0                   0                   0

  Columns 11 through 15

                   0                   0                   0                   0                   0

  Columns 16 through 20

                   0                   0                   0                   0                   0

  Columns 21 through 25

                   0                   0                   0                   0                   0

  Columns 26 through 30

                   0                   0                   0                   0                   0

  Column 31

                   0


BER =

  Columns 1 through 5

   0.265571322115275   0.233903961373744   0.200337441541974   0.165946051356233                   0

  Columns 6 through 10

                   0                   0                   0                   0                   0

  Columns 11 through 15

                   0                   0                   0                   0                   0

  Columns 16 through 20

                   0                   0                   0                   0                   0

  Columns 21 through 25

                   0                   0                   0                   0                   0

  Columns 26 through 30

                   0                   0                   0                   0                   0

  Column 31

                   0


BER =

  Columns 1 through 5

   0.265571322115275   0.233903961373744   0.200337441541974   0.165946051356233   0.131896024788758

  Columns 6 through 10

                   0                   0                   0                   0                   0

  Columns 11 through 15

                   0                   0                   0                   0                   0

  Columns 16 through 20

                   0                   0                   0                   0                   0

  Columns 21 through 25

                   0                   0                   0                   0                   0

  Columns 26 through 30

                   0                   0                   0                   0                   0

  Column 31

                   0


BER =

  Columns 1 through 5

   0.265571322115275   0.233903961373744   0.200337441541974   0.165946051356233   0.131896024788758

  Columns 6 through 10

   0.099774334547693                   0                   0                   0                   0

  Columns 11 through 15

                   0                   0                   0                   0                   0

  Columns 16 through 20

                   0                   0                   0                   0                   0

  Columns 21 through 25

                   0                   0                   0                   0                   0

  Columns 26 through 30

                   0                   0                   0                   0                   0

  Column 31

                   0


BER =

  Columns 1 through 5

   0.265571322115275   0.233903961373744   0.200337441541974   0.165946051356233   0.131896024788758

  Columns 6 through 10

   0.099774334547693   0.070676751817285                   0                   0                   0

  Columns 11 through 15

                   0                   0                   0                   0                   0

  Columns 16 through 20

                   0                   0                   0                   0                   0

  Columns 21 through 25

                   0                   0                   0                   0                   0

  Columns 26 through 30

                   0                   0                   0                   0                   0

  Column 31

                   0


BER =

  Columns 1 through 5

   0.265571322115275   0.233903961373744   0.200337441541974   0.165946051356233   0.131896024788758

  Columns 6 through 10

   0.099774334547693   0.070676751817285   0.044333159257604                   0                   0

  Columns 11 through 15

                   0                   0                   0                   0                   0

  Columns 16 through 20

                   0                   0                   0                   0                   0

  Columns 21 through 25

                   0                   0                   0                   0                   0

  Columns 26 through 30

                   0                   0                   0                   0                   0

  Column 31

                   0


BER =

  Columns 1 through 5

   0.265571322115275   0.233903961373744   0.200337441541974   0.165946051356233   0.131896024788758

  Columns 6 through 10

   0.099774334547693   0.070676751817285   0.044333159257604   0.024731203281462                   0

  Columns 11 through 15

                   0                   0                   0                   0                   0

  Columns 16 through 20

                   0                   0                   0                   0                   0

  Columns 21 through 25

                   0                   0                   0                   0                   0

  Columns 26 through 30

                   0                   0                   0                   0                   0

  Column 31

                   0


BER =

  Columns 1 through 5

   0.265571322115275   0.233903961373744   0.200337441541974   0.165946051356233   0.131896024788758

  Columns 6 through 10

   0.099774334547693   0.070676751817285   0.044333159257604   0.024731203281462   0.003330023355277

  Columns 11 through 15

                   0                   0                   0                   0                   0

  Columns 16 through 20

                   0                   0                   0                   0                   0

  Columns 21 through 25

                   0                   0                   0                   0                   0

  Columns 26 through 30

                   0                   0                   0                   0                   0

  Column 31

                   0


BER =

  Columns 1 through 5

   0.265571322115275   0.233903961373744   0.200337441541974   0.165946051356233   0.131896024788758

  Columns 6 through 10

   0.099774334547693   0.070676751817285   0.044333159257604   0.024731203281462   0.003330023355277

  Columns 11 through 15

   0.002307403903003                   0                   0                   0                   0

  Columns 16 through 20

                   0                   0                   0                   0                   0

  Columns 21 through 25

                   0                   0                   0                   0                   0

  Columns 26 through 30

                   0                   0                   0                   0                   0

  Column 31

                   0


BER =

  Columns 1 through 5

   0.265571322115275   0.233903961373744   0.200337441541974   0.165946051356233   0.131896024788758

  Columns 6 through 10

   0.099774334547693   0.070676751817285   0.044333159257604   0.024731203281462   0.003330023355277

  Columns 11 through 15

   0.002307403903003   0.001782504393149                   0                   0                   0

  Columns 16 through 20

                   0                   0                   0                   0                   0

  Columns 21 through 25

                   0                   0                   0                   0                   0

  Columns 26 through 30

                   0                   0                   0                   0                   0

  Column 31

                   0


BER =

  Columns 1 through 5

   0.265571322115275   0.233903961373744   0.200337441541974   0.165946051356233   0.131896024788758

  Columns 6 through 10

   0.099774334547693   0.070676751817285   0.044333159257604   0.024731203281462   0.003330023355277

  Columns 11 through 15

   0.002307403903003   0.001782504393149   0.001436668313394                   0                   0

  Columns 16 through 20

                   0                   0                   0                   0                   0

  Columns 21 through 25

                   0                   0                   0                   0                   0

  Columns 26 through 30

                   0                   0                   0                   0                   0

  Column 31

                   0


BER =

  Columns 1 through 5

   0.265571322115275   0.233903961373744   0.200337441541974   0.165946051356233   0.131896024788758

  Columns 6 through 10

   0.099774334547693   0.070676751817285   0.044333159257604   0.024731203281462   0.003330023355277

  Columns 11 through 15

   0.002307403903003   0.001782504393149   0.001436668313394   0.001185328148605                   0

  Columns 16 through 20

                   0                   0                   0                   0                   0

  Columns 21 through 25

                   0                   0                   0                   0                   0

  Columns 26 through 30

                   0                   0                   0                   0                   0

  Column 31

                   0


BER =

  Columns 1 through 5

   0.265571322115275   0.233903961373744   0.200337441541974   0.165946051356233   0.131896024788758

  Columns 6 through 10

   0.099774334547693   0.070676751817285   0.044333159257604   0.024731203281462   0.003330023355277

  Columns 11 through 15

   0.002307403903003   0.001782504393149   0.001436668313394   0.001185328148605   0.000992607552059

  Columns 16 through 20

                   0                   0                   0                   0                   0

  Columns 21 through 25

                   0                   0                   0                   0                   0

  Columns 26 through 30

                   0                   0                   0                   0                   0

  Column 31

                   0


BER =

  Columns 1 through 5

   0.265571322115275   0.233903961373744   0.200337441541974   0.165946051356233   0.131896024788758

  Columns 6 through 10

   0.099774334547693   0.070676751817285   0.044333159257604   0.024731203281462   0.003330023355277

  Columns 11 through 15

   0.002307403903003   0.001782504393149   0.001436668313394   0.001185328148605   0.000992607552059

  Columns 16 through 20

   0.000839757645924                   0                   0                   0                   0

  Columns 21 through 25

                   0                   0                   0                   0                   0

  Columns 26 through 30

                   0                   0                   0                   0                   0

  Column 31

                   0


BER =

  Columns 1 through 5

   0.265571322115275   0.233903961373744   0.200337441541974   0.165946051356233   0.131896024788758

  Columns 6 through 10

   0.099774334547693   0.070676751817285   0.044333159257604   0.024731203281462   0.003330023355277

  Columns 11 through 15

   0.002307403903003   0.001782504393149   0.001436668313394   0.001185328148605   0.000992607552059

  Columns 16 through 20

   0.000839757645924   0.000715695658535                   0                   0                   0

  Columns 21 through 25

                   0                   0                   0                   0                   0

  Columns 26 through 30

                   0                   0                   0                   0                   0

  Column 31

                   0


BER =

  Columns 1 through 5

   0.265571322115275   0.233903961373744   0.200337441541974   0.165946051356233   0.131896024788758

  Columns 6 through 10

   0.099774334547693   0.070676751817285   0.044333159257604   0.024731203281462   0.003330023355277

  Columns 11 through 15

   0.002307403903003   0.001782504393149   0.001436668313394   0.001185328148605   0.000992607552059

  Columns 16 through 20

   0.000839757645924   0.000715695658535   0.000613307527240                   0                   0

  Columns 21 through 25

                   0                   0                   0                   0                   0

  Columns 26 through 30

                   0                   0                   0                   0                   0

  Column 31

                   0


BER =

  Columns 1 through 5

   0.265571322115275   0.233903961373744   0.200337441541974   0.165946051356233   0.131896024788758

  Columns 6 through 10

   0.099774334547693   0.070676751817285   0.044333159257604   0.024731203281462   0.003330023355277

  Columns 11 through 15

   0.002307403903003   0.001782504393149   0.001436668313394   0.001185328148605   0.000992607552059

  Columns 16 through 20

   0.000839757645924   0.000715695658535   0.000613307527240   0.000527747613372                   0

  Columns 21 through 25

                   0                   0                   0                   0                   0

  Columns 26 through 30

                   0                   0                   0                   0                   0

  Column 31

                   0


BER =

  Columns 1 through 5

   0.265571322115275   0.233903961373744   0.200337441541974   0.165946051356233   0.131896024788758

  Columns 6 through 10

   0.099774334547693   0.070676751817285   0.044333159257604   0.024731203281462   0.003330023355277

  Columns 11 through 15

   0.002307403903003   0.001782504393149   0.001436668313394   0.001185328148605   0.000992607552059

  Columns 16 through 20

   0.000839757645924   0.000715695658535   0.000613307527240   0.000527747613372   0.000455564060724

  Columns 21 through 25

                   0                   0                   0                   0                   0

  Columns 26 through 30

                   0                   0                   0                   0                   0

  Column 31

                   0


BER =

  Columns 1 through 5

   0.265571322115275   0.233903961373744   0.200337441541974   0.165946051356233   0.131896024788758

  Columns 6 through 10

   0.099774334547693   0.070676751817285   0.044333159257604   0.024731203281462   0.003330023355277

  Columns 11 through 15

   0.002307403903003   0.001782504393149   0.001436668313394   0.001185328148605   0.000992607552059

  Columns 16 through 20

   0.000839757645924   0.000715695658535   0.000613307527240   0.000527747613372   0.000455564060724

  Columns 21 through 25

   0.000394210129380                   0                   0                   0                   0

  Columns 26 through 30

                   0                   0                   0                   0                   0

  Column 31

                   0


BER =

  Columns 1 through 5

   0.265571322115275   0.233903961373744   0.200337441541974   0.165946051356233   0.131896024788758

  Columns 6 through 10

   0.099774334547693   0.070676751817285   0.044333159257604   0.024731203281462   0.003330023355277

  Columns 11 through 15

   0.002307403903003   0.001782504393149   0.001436668313394   0.001185328148605   0.000992607552059

  Columns 16 through 20

   0.000839757645924   0.000715695658535   0.000613307527240   0.000527747613372   0.000455564060724

  Columns 21 through 25

   0.000394210129380   0.000341753220486                   0                   0                   0

  Columns 26 through 30

                   0                   0                   0                   0                   0

  Column 31

                   0


BER =

  Columns 1 through 5

   0.265571322115275   0.233903961373744   0.200337441541974   0.165946051356233   0.131896024788758

  Columns 6 through 10

   0.099774334547693   0.070676751817285   0.044333159257604   0.024731203281462   0.003330023355277

  Columns 11 through 15

   0.002307403903003   0.001782504393149   0.001436668313394   0.001185328148605   0.000992607552059

  Columns 16 through 20

   0.000839757645924   0.000715695658535   0.000613307527240   0.000527747613372   0.000455564060724

  Columns 21 through 25

   0.000394210129380   0.000341753220486   0.000296692594044                   0                   0

  Columns 26 through 30

                   0                   0                   0                   0                   0

  Column 31

                   0


BER =

  Columns 1 through 5

   0.265571322115275   0.233903961373744   0.200337441541974   0.165946051356233   0.131896024788758

  Columns 6 through 10

   0.099774334547693   0.070676751817285   0.044333159257604   0.024731203281462   0.003330023355277

  Columns 11 through 15

   0.002307403903003   0.001782504393149   0.001436668313394   0.001185328148605   0.000992607552059

  Columns 16 through 20

   0.000839757645924   0.000715695658535   0.000613307527240   0.000527747613372   0.000455564060724

  Columns 21 through 25

   0.000394210129380   0.000341753220486   0.000296692594044   0.000257840340368                   0

  Columns 26 through 30

                   0                   0                   0                   0                   0

  Column 31

                   0


BER =

  Columns 1 through 5

   0.265571322115275   0.233903961373744   0.200337441541974   0.165946051356233   0.131896024788758

  Columns 6 through 10

   0.099774334547693   0.070676751817285   0.044333159257604   0.024731203281462   0.003330023355277

  Columns 11 through 15

   0.002307403903003   0.001782504393149   0.001436668313394   0.001185328148605   0.000992607552059

  Columns 16 through 20

   0.000839757645924   0.000715695658535   0.000613307527240   0.000527747613372   0.000455564060724

  Columns 21 through 25

   0.000394210129380   0.000341753220486   0.000296692594044   0.000257840340368   0.000224240918705

  Columns 26 through 30

                   0                   0                   0                   0                   0

  Column 31

                   0


BER =

  Columns 1 through 5

   0.265571322115275   0.233903961373744   0.200337441541974   0.165946051356233   0.131896024788758

  Columns 6 through 10

   0.099774334547693   0.070676751817285   0.044333159257604   0.024731203281462   0.003330023355277

  Columns 11 through 15

   0.002307403903003   0.001782504393149   0.001436668313394   0.001185328148605   0.000992607552059

  Columns 16 through 20

   0.000839757645924   0.000715695658535   0.000613307527240   0.000527747613372   0.000455564060724

  Columns 21 through 25

   0.000394210129380   0.000341753220486   0.000296692594044   0.000257840340368   0.000224240918705

  Columns 26 through 30

   0.000195115146439                   0                   0                   0                   0

  Column 31

                   0


BER =

  Columns 1 through 5

   0.265571322115275   0.233903961373744   0.200337441541974   0.165946051356233   0.131896024788758

  Columns 6 through 10

   0.099774334547693   0.070676751817285   0.044333159257604   0.024731203281462   0.003330023355277

  Columns 11 through 15

   0.002307403903003   0.001782504393149   0.001436668313394   0.001185328148605   0.000992607552059

  Columns 16 through 20

   0.000839757645924   0.000715695658535   0.000613307527240   0.000527747613372   0.000455564060724

  Columns 21 through 25

   0.000394210129380   0.000341753220486   0.000296692594044   0.000257840340368   0.000224240918705

  Columns 26 through 30

   0.000195115146439   0.000169820211587                   0                   0                   0

  Column 31

                   0


BER =

  Columns 1 through 5

   0.265571322115275   0.233903961373744   0.200337441541974   0.165946051356233   0.131896024788758

  Columns 6 through 10

   0.099774334547693   0.070676751817285   0.044333159257604   0.024731203281462   0.003330023355277

  Columns 11 through 15

   0.002307403903003   0.001782504393149   0.001436668313394   0.001185328148605   0.000992607552059

  Columns 16 through 20

   0.000839757645924   0.000715695658535   0.000613307527240   0.000527747613372   0.000455564060724

  Columns 21 through 25

   0.000394210129380   0.000341753220486   0.000296692594044   0.000257840340368   0.000224240918705

  Columns 26 through 30

   0.000195115146439   0.000169820211587   0.000147820489713                   0                   0

  Column 31

                   0


BER =

  Columns 1 through 5

   0.265571322115275   0.233903961373744   0.200337441541974   0.165946051356233   0.131896024788758

  Columns 6 through 10

   0.099774334547693   0.070676751817285   0.044333159257604   0.024731203281462   0.003330023355277

  Columns 11 through 15

   0.002307403903003   0.001782504393149   0.001436668313394   0.001185328148605   0.000992607552059

  Columns 16 through 20

   0.000839757645924   0.000715695658535   0.000613307527240   0.000527747613372   0.000455564060724

  Columns 21 through 25

   0.000394210129380   0.000341753220486   0.000296692594044   0.000257840340368   0.000224240918705

  Columns 26 through 30

   0.000195115146439   0.000169820211587   0.000147820489713   0.000128665829205                   0

  Column 31

                   0


BER =

  Columns 1 through 5

   0.265571322115275   0.233903961373744   0.200337441541974   0.165946051356233   0.131896024788758

  Columns 6 through 10

   0.099774334547693   0.070676751817285   0.044333159257604   0.024731203281462   0.003330023355277

  Columns 11 through 15

   0.002307403903003   0.001782504393149   0.001436668313394   0.001185328148605   0.000992607552059

  Columns 16 through 20

   0.000839757645924   0.000715695658535   0.000613307527240   0.000527747613372   0.000455564060724

  Columns 21 through 25

   0.000394210129380   0.000341753220486   0.000296692594044   0.000257840340368   0.000224240918705

  Columns 26 through 30

   0.000195115146439   0.000169820211587   0.000147820489713   0.000128665829205   0.000111975112722

  Column 31

                   0


BER =

  Columns 1 through 5

   0.265571322115275   0.233903961373744   0.200337441541974   0.165946051356233   0.131896024788758

  Columns 6 through 10

   0.099774334547693   0.070676751817285   0.044333159257604   0.024731203281462   0.003330023355277

  Columns 11 through 15

   0.002307403903003   0.001782504393149   0.001436668313394   0.001185328148605   0.000992607552059

  Columns 16 through 20

   0.000839757645924   0.000715695658535   0.000613307527240   0.000527747613372   0.000455564060724

  Columns 21 through 25

   0.000394210129380   0.000341753220486   0.000296692594044   0.000257840340368   0.000224240918705

  Columns 26 through 30

   0.000195115146439   0.000169820211587   0.000147820489713   0.000128665829205   0.000111975112722

  Column 31

   0.000097423618775

Elapsed time is 61780.927877 seconds.
