# Supplementary material for: An Efficient Design of Systematic Rateless Codes
Source: Hindawi journal article supplement (doi:10.1155/2020/8068414), 2020-05-19
Supplement: f1 [file 8068414.f1.zip › supplementary files/Matlab_code_for_Figure1/BER_by_DDE/Quan_fun2.m]

function Q=Quan_fun2(w,delta)  % wÎª´ýÁ¿»¯µÄÊý¾Ý£¬deltaÊÇÁ¿»¯¼ä¸ô£¬LÎªÈ¡Öµ·¶Î§
% clear;
% clc;
% delta=0.1;  % Á¿»¯¼ä¸ô
% w_min=minvalue;   % È¡Öµ·¶Î§
% w_max=maxvalue;
% if (isempty(find(w>w_max, 1))==0) || (isempty(find(w<w_min, 1))==0)
%     error('The input of Quan_fun is out of its range');
% end;
[a,b]=size(w);
Q=zeros(a,b);
% temp_index=find(w>=delta/2);
Q(w>=delta/2)=floor(w(w>=delta/2)/delta+1/2)*delta;

% temp_index=find(w<=-delta/2);
Q(w<=-delta/2)=ceil(w(w<=-delta/2)/delta-1/2)*delta;

% temp_index=find(w(temp_index)>-delta/2&w(temp_index)<delta/2);
% Q(temp_index)=0;
