# Supplementary material for: An Efficient Design of Systematic Rateless Codes
Source: Hindawi journal article supplement (doi:10.1155/2020/8068414), 2020-05-19
Supplement: f1 [file 8068414.f1.zip › supplementary files/Matlab_code_for_Figure1/BER_by_DDE/test.txt]

ÐÅµÀÎªAWGNÐÅµÀ

EsN0indB_vec =

  1 ÖÁ 5 ÁÐ

  -5.000000000000000  -4.500000000000000  -4.000000000000000  -3.500000000000000  -3.000000000000000

  6 ÖÁ 10 ÁÐ

  -2.500000000000000  -2.000000000000000  -1.500000000000000  -1.000000000000000  -0.500000000000000

  11 ÖÁ 15 ÁÐ

                   0   0.500000000000000   1.000000000000000   1.500000000000000   2.000000000000000

  16 ÖÁ 17 ÁÐ

   2.500000000000000   3.000000000000000

ÖÆ±í³É¹¦

LT_overhead =

     2

µ±Ç°Ñ¡ÔñLTÂë
µ±Ç°Ñ¡Ôñ·ÇÏµÍ³Âë
×ÜÂëÂÊ=0.50000, ÍâÂëÂëÂÊ=1.00000, ÄÚÂëÂëÂÊ=0.50000

out_node_index =

     1     2     3     4     5     8     9    19    65    66


ans =

  1 ÖÁ 5 ÁÐ

   0.007969000000000   0.493570000000000   0.166220000000000   0.072646000000000   0.082558000000000

  6 ÖÁ 10 ÁÐ

   0.056058000000000   0.037229000000000   0.055590000000000   0.025023000000000   0.003135000000000


inner_code_BER =

  1 ÖÁ 5 ÁÐ

   0.451181924687112                   0                   0                   0                   0

  6 ÖÁ 10 ÁÐ

                   0                   0                   0                   0                   0

  11 ÖÁ 15 ÁÐ

                   0                   0                   0                   0                   0

  16 ÖÁ 17 ÁÐ

                   0                   0


inner_code_BER =

  1 ÖÁ 5 ÁÐ

   0.451181924687112   0.432383903370603                   0                   0                   0

  6 ÖÁ 10 ÁÐ

                   0                   0                   0                   0                   0

  11 ÖÁ 15 ÁÐ

                   0                   0                   0                   0                   0

  16 ÖÁ 17 ÁÐ

                   0                   0


inner_code_BER =

  1 ÖÁ 5 ÁÐ

   0.451181924687112   0.432383903370603   0.397532813560820                   0                   0

  6 ÖÁ 10 ÁÐ

                   0                   0                   0                   0                   0

  11 ÖÁ 15 ÁÐ

                   0                   0                   0                   0                   0

  16 ÖÁ 17 ÁÐ

                   0                   0


inner_code_BER =

  1 ÖÁ 5 ÁÐ

   0.451181924687112   0.432383903370603   0.397532813560820   0.315056018912030                   0

  6 ÖÁ 10 ÁÐ

                   0                   0                   0                   0                   0

  11 ÖÁ 15 ÁÐ

                   0                   0                   0                   0                   0

  16 ÖÁ 17 ÁÐ

                   0                   0


inner_code_BER =

  1 ÖÁ 5 ÁÐ

   0.451181924687112   0.432383903370603   0.397532813560820   0.315056018912030   0.133677885128241

  6 ÖÁ 10 ÁÐ

                   0                   0                   0                   0                   0

  11 ÖÁ 15 ÁÐ

                   0                   0                   0                   0                   0

  16 ÖÁ 17 ÁÐ

                   0                   0


inner_code_BER =

  1 ÖÁ 5 ÁÐ

   0.451181924687112   0.432383903370603   0.397532813560820   0.315056018912030   0.133677885128241

  6 ÖÁ 10 ÁÐ

   0.002189785731450                   0                   0                   0                   0

  11 ÖÁ 15 ÁÐ

                   0                   0                   0                   0                   0

  16 ÖÁ 17 ÁÐ

                   0                   0


inner_code_BER =

  1 ÖÁ 5 ÁÐ

   0.451181924687112   0.432383903370603   0.397532813560820   0.315056018912030   0.133677885128241

  6 ÖÁ 10 ÁÐ

   0.002189785731450   0.000884912219825                   0                   0                   0

  11 ÖÁ 15 ÁÐ

                   0                   0                   0                   0                   0

  16 ÖÁ 17 ÁÐ

                   0                   0


inner_code_BER =

  1 ÖÁ 5 ÁÐ

   0.451181924687112   0.432383903370603   0.397532813560820   0.315056018912030   0.133677885128241

  6 ÖÁ 10 ÁÐ

   0.002189785731450   0.000884912219825   0.000456103171332                   0                   0

  11 ÖÁ 15 ÁÐ

                   0                   0                   0                   0                   0

  16 ÖÁ 17 ÁÐ

                   0                   0


inner_code_BER =

  1 ÖÁ 5 ÁÐ

   0.451181924687112   0.432383903370603   0.397532813560820   0.315056018912030   0.133677885128241

  6 ÖÁ 10 ÁÐ

   0.002189785731450   0.000884912219825   0.000456103171332   0.000252311028613                   0

  11 ÖÁ 15 ÁÐ

                   0                   0                   0                   0                   0

  16 ÖÁ 17 ÁÐ

                   0                   0


inner_code_BER =

  1 ÖÁ 5 ÁÐ

   0.451181924687112   0.432383903370603   0.397532813560820   0.315056018912030   0.133677885128241

  6 ÖÁ 10 ÁÐ

   0.002189785731450   0.000884912219825   0.000456103171332   0.000252311028613   0.000144314187352

  11 ÖÁ 15 ÁÐ

                   0                   0                   0                   0                   0

  16 ÖÁ 17 ÁÐ

                   0                   0


inner_code_BER =

  1 ÖÁ 5 ÁÐ

   0.451181924687112   0.432383903370603   0.397532813560820   0.315056018912030   0.133677885128241

  6 ÖÁ 10 ÁÐ

   0.002189785731450   0.000884912219825   0.000456103171332   0.000252311028613   0.000144314187352

  11 ÖÁ 15 ÁÐ

   0.000084245779583                   0                   0                   0                   0

  16 ÖÁ 17 ÁÐ

                   0                   0


inner_code_BER =

  1 ÖÁ 5 ÁÐ

   0.451181924687112   0.432383903370603   0.397532813560820   0.315056018912030   0.133677885128241

  6 ÖÁ 10 ÁÐ

   0.002189785731450   0.000884912219825   0.000456103171332   0.000252311028613   0.000144314187352

  11 ÖÁ 15 ÁÐ

   0.000084245779583   0.000049965253545                   0                   0                   0

  16 ÖÁ 17 ÁÐ

                   0                   0


inner_code_BER =

  1 ÖÁ 5 ÁÐ

   0.451181924687112   0.432383903370603   0.397532813560820   0.315056018912030   0.133677885128241

  6 ÖÁ 10 ÁÐ

   0.002189785731450   0.000884912219825   0.000456103171332   0.000252311028613   0.000144314187352

  11 ÖÁ 15 ÁÐ

   0.000084245779583   0.000049965253545   0.000030072880538                   0                   0

  16 ÖÁ 17 ÁÐ

                   0                   0


inner_code_BER =

  1 ÖÁ 5 ÁÐ

   0.451181924687112   0.432383903370603   0.397532813560820   0.315056018912030   0.133677885128241

  6 ÖÁ 10 ÁÐ

   0.002189785731450   0.000884912219825   0.000456103171332   0.000252311028613   0.000144314187352

  11 ÖÁ 15 ÁÐ

   0.000084245779583   0.000049965253545   0.000030072880538   0.000018368053165                   0

  16 ÖÁ 17 ÁÐ

                   0                   0


inner_code_BER =

  1 ÖÁ 5 ÁÐ

   0.451181924687112   0.432383903370603   0.397532813560820   0.315056018912030   0.133677885128241

  6 ÖÁ 10 ÁÐ

   0.002189785731450   0.000884912219825   0.000456103171332   0.000252311028613   0.000144314187352

  11 ÖÁ 15 ÁÐ

   0.000084245779583   0.000049965253545   0.000030072880538   0.000018368053165   0.000011382162132

  16 ÖÁ 17 ÁÐ

                   0                   0


inner_code_BER =

  1 ÖÁ 5 ÁÐ

   0.451181924687112   0.432383903370603   0.397532813560820   0.315056018912030   0.133677885128241

  6 ÖÁ 10 ÁÐ

   0.002189785731450   0.000884912219825   0.000456103171332   0.000252311028613   0.000144314187352

  11 ÖÁ 15 ÁÐ

   0.000084245779583   0.000049965253545   0.000030072880538   0.000018368053165   0.000011382162132

  16 ÖÁ 17 ÁÐ

   0.000007146545852                   0


inner_code_BER =

  1 ÖÁ 5 ÁÐ

   0.451181924687112   0.432383903370603   0.397532813560820   0.315056018912030   0.133677885128241

  6 ÖÁ 10 ÁÐ

   0.002189785731450   0.000884912219825   0.000456103171332   0.000252311028613   0.000144314187352

  11 ÖÁ 15 ÁÐ

   0.000084245779583   0.000049965253545   0.000030072880538   0.000018368053165   0.000011382162132

  16 ÖÁ 17 ÁÐ

   0.000007146545852   0.000004534117651

Ê±¼äÒÑ¹ý 3072.894670 Ãë¡£
