# Supplementary material for: An Efficient Design of Systematic Rateless Codes
Source: Hindawi journal article supplement (doi:10.1155/2020/8068414), 2020-05-19
Supplement: f1 [file 8068414.f1.zip › supplementary files/Matlab_code_for_Figure1/BER_by_DDE/var_nodes_index_gen.m]

function var=var_nodes_index_gen(dl,degree_num)
if degree_num>5
    error('×î´óÖ»Ö§³Ö5¸ö·ÇÁã¶ÈÊýµÄ²úÉú')
end;
var=[];
if degree_num==2
    tp(1)=2;
    tp(2)=dl;
    var=tp;
end;

if degree_num==3
    tp(1)=2;tp(2)=3;tp(3)=dl;
    var=tp;
end;

if degree_num==4
    tp(1)=2;tp(2)=3;
    for k=4:dl-1
        tp(3)=k;tp(4)=dl;
        var=[var;tp];
    end;
end;

if degree_num==5
   tp(1)=2;tp(2)=3;
   for k=4:dl-2
       tp(3)=k;
       for q=k+1:dl-1
           tp(4)=q;
           tp(5)=dl;
           var=[var;tp];
       end;
       
   end;
end;
    
