# Supplementary material for: An Efficient Design of Systematic Rateless Codes
Source: Hindawi journal article supplement (doi:10.1155/2020/8068414), 2020-05-19
Supplement: f1 [file 8068414.f1.zip › supplementary files/Matlab_code_for_Figure1/BER_by_DDE/VarNode_conv.m]

% 20160911 ±äÁ¿½ÚµãÏûÏ¢¼ÆËã
function pv=VarNode_conv(varargin)
% pv_init:ÐÅµÀ½ÚµãÏûÏ¢£¬Èç¹ûÖ»ÓÐÈý¸öÊäÈë²ÎÊýÔò¸ÃÏî²»´æÔÚ
% pu:Ð£Ñé½ÚµãÏûÏ¢
% iii: Ð£Ñé½ÚµãÏûÏ¢¸öÊý£¨²ÎÓëÔËËãµÄÏûÏ¢¸öÊý£©
% v:ÏûÏ¢È¡Öµ
% delta:ÏûÏ¢²ÉÑù¼ä¸ô
if nargin==4
   pu=varargin{1};iii=varargin{2};v=varargin{3};delta=varargin{4};
   zeropad=zeros(1,length(pu)*(iii-1)-(iii-2));
%    bar=zeropad;
   zeropad(1:length(v))=pu*delta;
%    bar(1:length(v))=pv_init*delta;

    F_zeropad=fft(zeropad);
    foo=F_zeropad.^(iii-1);
%     foo=foo.*fft(bar);
    IF_zeropad=ifft(foo);
    minx=(iii-1)*v(1);   % ÀýÈç 2*-20=-40
    v_minx_index=round((v(1)-minx)/delta)+1;
    v_maxx_index=v_minx_index+length(v)-1;
    ufl=abs(sum(IF_zeropad(1:(v_minx_index-1))));
    ofl=abs(sum(IF_zeropad((1+v_maxx_index):length(IF_zeropad))));

    IF_zeropad(v_minx_index)=IF_zeropad(v_minx_index)+ufl;
    IF_zeropad(v_maxx_index)=IF_zeropad(v_maxx_index)+ofl;
    pv=abs(IF_zeropad(v_minx_index:v_maxx_index));
elseif nargin==5
   pv_init=varargin{1};pu=varargin{2};iii=varargin{3};v=varargin{4};delta=varargin{5};
   
   zeropad=zeros(1,length(pv_init)+length(pu)*(iii-1)-(iii-1));
   bar=zeropad;
   zeropad(1:length(v))=pu*delta;
   bar(1:length(v))=pv_init*delta;

    F_zeropad=fft(zeropad);
    foo=F_zeropad.^(iii-1);
    foo=foo.*fft(bar);
    IF_zeropad=ifft(foo);
    minx=(1+(iii-1))*v(1);   % ÀýÈç 3*-20=-60
    v_minx_index=round((v(1)-minx)/delta)+1;
    v_maxx_index=v_minx_index+length(v)-1;
    ufl=abs(sum(IF_zeropad(1:(v_minx_index-1))));
    ofl=abs(sum(IF_zeropad((1+v_maxx_index):length(IF_zeropad))));

    IF_zeropad(v_minx_index)=IF_zeropad(v_minx_index)+ufl;
    IF_zeropad(v_maxx_index)=IF_zeropad(v_maxx_index)+ofl;
    pv=abs(IF_zeropad(v_minx_index:v_maxx_index));
end;
