# Supplementary material for: An Efficient Design of Systematic Rateless Codes
Source: Hindawi journal article supplement (doi:10.1155/2020/8068414), 2020-05-19
Supplement: f1 [file 8068414.f1.zip › supplementary files/Matlab_code_for_Figure1/BER_by_DDE/仿真结果/BER_by_DDE_awgn_rate_1_2_dist0_Ns.txt]

ÐÅµÀÎªAWGNÐÅµÀ

EbN0indB_vec =

  Columns 1 through 5

  -1.000000000000000  -0.900000000000000  -0.800000000000000  -0.700000000000000  -0.600000000000000

  Columns 6 through 10

  -0.500000000000000  -0.400000000000000  -0.300000000000000  -0.200000000000000  -0.100000000000000

  Columns 11 through 15

                   0   0.100000000000000   0.200000000000000   0.300000000000000   0.400000000000000

  Columns 16 through 20

   0.500000000000000   0.600000000000000   0.700000000000000   0.800000000000000   0.900000000000000

  Columns 21 through 25

   1.000000000000000   1.100000000000000   1.200000000000000   1.300000000000000   1.400000000000000

  Columns 26 through 30

   1.500000000000000   1.600000000000000   1.700000000000000   1.800000000000000   1.900000000000000

  Column 31

   2.000000000000000

ÖÆ±í³É¹¦
µ±Ç°Ñ¡ÔñRaptorÂëµ±Ç°Ñ¡Ôñ·ÇÏµÍ³Âë
×ÜÂëÂÊ=0.50000, ÍâÂëÂëÂÊ=0.98039, ÄÚÂëÂëÂÊ=0.51000

out_node_index =

     1     2     3     4     5     8     9    19    65    66


ans =

  Columns 1 through 5

   0.007969000000000   0.493570000000000   0.166220000000000   0.072646000000000   0.082558000000000

  Columns 6 through 10

   0.056058000000000   0.037229000000000   0.055590000000000   0.025023000000000   0.003135000000000


ans =

  Columns 1 through 5

   0.007969000000000   0.493570000000000   0.166220000000000   0.072646000000000   0.082558000000000

  Columns 6 through 10

   0.056058000000000   0.037229000000000   0.055590000000000   0.025023000000000   0.003135000000000


inner_code_BER =

  Columns 1 through 5

   0.410910238283889                   0                   0                   0                   0

  Columns 6 through 10

                   0                   0                   0                   0                   0

  Columns 11 through 15

                   0                   0                   0                   0                   0

  Columns 16 through 20

                   0                   0                   0                   0                   0

  Columns 21 through 25

                   0                   0                   0                   0                   0

  Columns 26 through 30

                   0                   0                   0                   0                   0

  Column 31

                   0


outer_code_BER =

  Columns 1 through 5

   0.410910238283889                   0                   0                   0                   0

  Columns 6 through 10

                   0                   0                   0                   0                   0

  Columns 11 through 15

                   0                   0                   0                   0                   0

  Columns 16 through 20

                   0                   0                   0                   0                   0

  Columns 21 through 25

                   0                   0                   0                   0                   0

  Columns 26 through 30

                   0                   0                   0                   0                   0

  Column 31

                   0


inner_code_BER =

  Columns 1 through 5

   0.410910238283889   0.402445829810032                   0                   0                   0

  Columns 6 through 10

                   0                   0                   0                   0                   0

  Columns 11 through 15

                   0                   0                   0                   0                   0

  Columns 16 through 20

                   0                   0                   0                   0                   0

  Columns 21 through 25

                   0                   0                   0                   0                   0

  Columns 26 through 30

                   0                   0                   0                   0                   0

  Column 31

                   0


outer_code_BER =

  Columns 1 through 5

   0.410910238283889   0.402445829810032                   0                   0                   0

  Columns 6 through 10

                   0                   0                   0                   0                   0

  Columns 11 through 15

                   0                   0                   0                   0                   0

  Columns 16 through 20

                   0                   0                   0                   0                   0

  Columns 21 through 25

                   0                   0                   0                   0                   0

  Columns 26 through 30

                   0                   0                   0                   0                   0

  Column 31

                   0


inner_code_BER =

  Columns 1 through 5

   0.410910238283889   0.402445829810032   0.392467447109873                   0                   0

  Columns 6 through 10

                   0                   0                   0                   0                   0

  Columns 11 through 15

                   0                   0                   0                   0                   0

  Columns 16 through 20

                   0                   0                   0                   0                   0

  Columns 21 through 25

                   0                   0                   0                   0                   0

  Columns 26 through 30

                   0                   0                   0                   0                   0

  Column 31

                   0


outer_code_BER =

  Columns 1 through 5

   0.410910238283889   0.402445829810032   0.392467447109873                   0                   0

  Columns 6 through 10

                   0                   0                   0                   0                   0

  Columns 11 through 15

                   0                   0                   0                   0                   0

  Columns 16 through 20

                   0                   0                   0                   0                   0

  Columns 21 through 25

                   0                   0                   0                   0                   0

  Columns 26 through 30

                   0                   0                   0                   0                   0

  Column 31

                   0


inner_code_BER =

  Columns 1 through 5

   0.410910238283889   0.402445829810032   0.392467447109873   0.380566412018356                   0

  Columns 6 through 10

                   0                   0                   0                   0                   0

  Columns 11 through 15

                   0                   0                   0                   0                   0

  Columns 16 through 20

                   0                   0                   0                   0                   0

  Columns 21 through 25

                   0                   0                   0                   0                   0

  Columns 26 through 30

                   0                   0                   0                   0                   0

  Column 31

                   0


outer_code_BER =

  Columns 1 through 5

   0.410910238283889   0.402445829810032   0.392467447109873   0.380566412018355                   0

  Columns 6 through 10

                   0                   0                   0                   0                   0

  Columns 11 through 15

                   0                   0                   0                   0                   0

  Columns 16 through 20

                   0                   0                   0                   0                   0

  Columns 21 through 25

                   0                   0                   0                   0                   0

  Columns 26 through 30

                   0                   0                   0                   0                   0

  Column 31

                   0


inner_code_BER =

  Columns 1 through 5

   0.410910238283889   0.402445829810032   0.392467447109873   0.380566412018356   0.366217026897481

  Columns 6 through 10

                   0                   0                   0                   0                   0

  Columns 11 through 15

                   0                   0                   0                   0                   0

  Columns 16 through 20

                   0                   0                   0                   0                   0

  Columns 21 through 25

                   0                   0                   0                   0                   0

  Columns 26 through 30

                   0                   0                   0                   0                   0

  Column 31

                   0


outer_code_BER =

  Columns 1 through 5

   0.410910238283889   0.402445829810032   0.392467447109873   0.380566412018355   0.366217026897480

  Columns 6 through 10

                   0                   0                   0                   0                   0

  Columns 11 through 15

                   0                   0                   0                   0                   0

  Columns 16 through 20

                   0                   0                   0                   0                   0

  Columns 21 through 25

                   0                   0                   0                   0                   0

  Columns 26 through 30

                   0                   0                   0                   0                   0

  Column 31

                   0


inner_code_BER =

  Columns 1 through 5

   0.410910238283889   0.402445829810032   0.392467447109873   0.380566412018356   0.366217026897481

  Columns 6 through 10

   0.348767607538045                   0                   0                   0                   0

  Columns 11 through 15

                   0                   0                   0                   0                   0

  Columns 16 through 20

                   0                   0                   0                   0                   0

  Columns 21 through 25

                   0                   0                   0                   0                   0

  Columns 26 through 30

                   0                   0                   0                   0                   0

  Column 31

                   0


outer_code_BER =

  Columns 1 through 5

   0.410910238283889   0.402445829810032   0.392467447109873   0.380566412018355   0.366217026897480

  Columns 6 through 10

   0.348767607538046                   0                   0                   0                   0

  Columns 11 through 15

                   0                   0                   0                   0                   0

  Columns 16 through 20

                   0                   0                   0                   0                   0

  Columns 21 through 25

                   0                   0                   0                   0                   0

  Columns 26 through 30

                   0                   0                   0                   0                   0

  Column 31

                   0


inner_code_BER =

  Columns 1 through 5

   0.410910238283889   0.402445829810032   0.392467447109873   0.380566412018356   0.366217026897481

  Columns 6 through 10

   0.348767607538045   0.327468443681922                   0                   0                   0

  Columns 11 through 15

                   0                   0                   0                   0                   0

  Columns 16 through 20

                   0                   0                   0                   0                   0

  Columns 21 through 25

                   0                   0                   0                   0                   0

  Columns 26 through 30

                   0                   0                   0                   0                   0

  Column 31

                   0


outer_code_BER =

  Columns 1 through 5

   0.410910238283889   0.402445829810032   0.392467447109873   0.380566412018355   0.366217026897480

  Columns 6 through 10

   0.348767607538046   0.327468443681922                   0                   0                   0

  Columns 11 through 15

                   0                   0                   0                   0                   0

  Columns 16 through 20

                   0                   0                   0                   0                   0

  Columns 21 through 25

                   0                   0                   0                   0                   0

  Columns 26 through 30

                   0                   0                   0                   0                   0

  Column 31

                   0


inner_code_BER =

  Columns 1 through 5

   0.410910238283889   0.402445829810032   0.392467447109873   0.380566412018356   0.366217026897481

  Columns 6 through 10

   0.348767607538045   0.327468443681922   0.301582235867148                   0                   0

  Columns 11 through 15

                   0                   0                   0                   0                   0

  Columns 16 through 20

                   0                   0                   0                   0                   0

  Columns 21 through 25

                   0                   0                   0                   0                   0

  Columns 26 through 30

                   0                   0                   0                   0                   0

  Column 31

                   0


outer_code_BER =

  Columns 1 through 5

   0.410910238283889   0.402445829810032   0.392467447109873   0.380566412018355   0.366217026897480

  Columns 6 through 10

   0.348767607538046   0.327468443681922   0.301582235867149                   0                   0

  Columns 11 through 15

                   0                   0                   0                   0                   0

  Columns 16 through 20

                   0                   0                   0                   0                   0

  Columns 21 through 25

                   0                   0                   0                   0                   0

  Columns 26 through 30

                   0                   0                   0                   0                   0

  Column 31

                   0


inner_code_BER =

  Columns 1 through 5

   0.410910238283889   0.402445829810032   0.392467447109873   0.380566412018356   0.366217026897481

  Columns 6 through 10

   0.348767607538045   0.327468443681922   0.301582235867148   0.270634823593091                   0

  Columns 11 through 15

                   0                   0                   0                   0                   0

  Columns 16 through 20

                   0                   0                   0                   0                   0

  Columns 21 through 25

                   0                   0                   0                   0                   0

  Columns 26 through 30

                   0                   0                   0                   0                   0

  Column 31

                   0


outer_code_BER =

  Columns 1 through 5

   0.410910238283889   0.402445829810032   0.392467447109873   0.380566412018355   0.366217026897480

  Columns 6 through 10

   0.348767607538046   0.327468443681922   0.301582235867149   0.270634823593092                   0

  Columns 11 through 15

                   0                   0                   0                   0                   0

  Columns 16 through 20

                   0                   0                   0                   0                   0

  Columns 21 through 25

                   0                   0                   0                   0                   0

  Columns 26 through 30

                   0                   0                   0                   0                   0

  Column 31

                   0


inner_code_BER =

  Columns 1 through 5

   0.410910238283889   0.402445829810032   0.392467447109873   0.380566412018356   0.366217026897481

  Columns 6 through 10

   0.348767607538045   0.327468443681922   0.301582235867148   0.270634823593091   0.234787523465536

  Columns 11 through 15

                   0                   0                   0                   0                   0

  Columns 16 through 20

                   0                   0                   0                   0                   0

  Columns 21 through 25

                   0                   0                   0                   0                   0

  Columns 26 through 30

                   0                   0                   0                   0                   0

  Column 31

                   0


outer_code_BER =

  Columns 1 through 5

   0.410910238283889   0.402445829810032   0.392467447109873   0.380566412018355   0.366217026897480

  Columns 6 through 10

   0.348767607538046   0.327468443681922   0.301582235867149   0.270634823593092   0.234787523465536

  Columns 11 through 15

                   0                   0                   0                   0                   0

  Columns 16 through 20

                   0                   0                   0                   0                   0

  Columns 21 through 25

                   0                   0                   0                   0                   0

  Columns 26 through 30

                   0                   0                   0                   0                   0

  Column 31

                   0


inner_code_BER =

  Columns 1 through 5

   0.410910238283889   0.402445829810032   0.392467447109873   0.380566412018356   0.366217026897481

  Columns 6 through 10

   0.348767607538045   0.327468443681922   0.301582235867148   0.270634823593091   0.234787523465536

  Columns 11 through 15

   0.195030608898406                   0                   0                   0                   0

  Columns 16 through 20

                   0                   0                   0                   0                   0

  Columns 21 through 25

                   0                   0                   0                   0                   0

  Columns 26 through 30

                   0                   0                   0                   0                   0

  Column 31

                   0


outer_code_BER =

  Columns 1 through 5

   0.410910238283889   0.402445829810032   0.392467447109873   0.380566412018355   0.366217026897480

  Columns 6 through 10

   0.348767607538046   0.327468443681922   0.301582235867149   0.270634823593092   0.234787523465536

  Columns 11 through 15

   0.195030608898406                   0                   0                   0                   0

  Columns 16 through 20

                   0                   0                   0                   0                   0

  Columns 21 through 25

                   0                   0                   0                   0                   0

  Columns 26 through 30

                   0                   0                   0                   0                   0

  Column 31

                   0


inner_code_BER =

  Columns 1 through 5

   0.410910238283889   0.402445829810032   0.392467447109873   0.380566412018356   0.366217026897481

  Columns 6 through 10

   0.348767607538045   0.327468443681922   0.301582235867148   0.270634823593091   0.234787523465536

  Columns 11 through 15

   0.195030608898406   0.152969767365648                   0                   0                   0

  Columns 16 through 20

                   0                   0                   0                   0                   0

  Columns 21 through 25

                   0                   0                   0                   0                   0

  Columns 26 through 30

                   0                   0                   0                   0                   0

  Column 31

                   0


outer_code_BER =

  Columns 1 through 5

   0.410910238283889   0.402445829810032   0.392467447109873   0.380566412018355   0.366217026897480

  Columns 6 through 10

   0.348767607538046   0.327468443681922   0.301582235867149   0.270634823593092   0.234787523465536

  Columns 11 through 15

   0.195030608898406   0.152969767365648                   0                   0                   0

  Columns 16 through 20

                   0                   0                   0                   0                   0

  Columns 21 through 25

                   0                   0                   0                   0                   0

  Columns 26 through 30

                   0                   0                   0                   0                   0

  Column 31

                   0


inner_code_BER =

  Columns 1 through 5

   0.410910238283889   0.402445829810032   0.392467447109873   0.380566412018356   0.366217026897481

  Columns 6 through 10

   0.348767607538045   0.327468443681922   0.301582235867148   0.270634823593091   0.234787523465536

  Columns 11 through 15

   0.195030608898406   0.152969767365648   0.111342411184112                   0                   0

  Columns 16 through 20

                   0                   0                   0                   0                   0

  Columns 21 through 25

                   0                   0                   0                   0                   0

  Columns 26 through 30

                   0                   0                   0                   0                   0

  Column 31

                   0


outer_code_BER =

  Columns 1 through 5

   0.410910238283889   0.402445829810032   0.392467447109873   0.380566412018355   0.366217026897480

  Columns 6 through 10

   0.348767607538046   0.327468443681922   0.301582235867149   0.270634823593092   0.234787523465536

  Columns 11 through 15

   0.195030608898406   0.152969767365648   0.111342411184112                   0                   0

  Columns 16 through 20

                   0                   0                   0                   0                   0

  Columns 21 through 25

                   0                   0                   0                   0                   0

  Columns 26 through 30

                   0                   0                   0                   0                   0

  Column 31

                   0


inner_code_BER =

  Columns 1 through 5

   0.410910238283889   0.402445829810032   0.392467447109873   0.380566412018356   0.366217026897481

  Columns 6 through 10

   0.348767607538045   0.327468443681922   0.301582235867148   0.270634823593091   0.234787523465536

  Columns 11 through 15

   0.195030608898406   0.152969767365648   0.111342411184112   0.073544745190684                   0

  Columns 16 through 20

                   0                   0                   0                   0                   0

  Columns 21 through 25

                   0                   0                   0                   0                   0

  Columns 26 through 30

                   0                   0                   0                   0                   0

  Column 31

                   0


outer_code_BER =

  Columns 1 through 5

   0.410910238283889   0.402445829810032   0.392467447109873   0.380566412018355   0.366217026897480

  Columns 6 through 10

   0.348767607538046   0.327468443681922   0.301582235867149   0.270634823593092   0.234787523465536

  Columns 11 through 15

   0.195030608898406   0.152969767365648   0.111342411184112   0.073544745190702                   0

  Columns 16 through 20

                   0                   0                   0                   0                   0

  Columns 21 through 25

                   0                   0                   0                   0                   0

  Columns 26 through 30

                   0                   0                   0                   0                   0

  Column 31

                   0


inner_code_BER =

  Columns 1 through 5

   0.410910238283889   0.402445829810032   0.392467447109873   0.380566412018356   0.366217026897481

  Columns 6 through 10

   0.348767607538045   0.327468443681922   0.301582235867148   0.270634823593091   0.234787523465536

  Columns 11 through 15

   0.195030608898406   0.152969767365648   0.111342411184112   0.073544745190684   0.039577945024544

  Columns 16 through 20

                   0                   0                   0                   0                   0

  Columns 21 through 25

                   0                   0                   0                   0                   0

  Columns 26 through 30

                   0                   0                   0                   0                   0

  Column 31

                   0


outer_code_BER =

  Columns 1 through 5

   0.410910238283889   0.402445829810032   0.392467447109873   0.380566412018355   0.366217026897480

  Columns 6 through 10

   0.348767607538046   0.327468443681922   0.301582235867149   0.270634823593092   0.234787523465536

  Columns 11 through 15

   0.195030608898406   0.152969767365648   0.111342411184112   0.073544745190702   0.039577947849300

  Columns 16 through 20

                   0                   0                   0                   0                   0

  Columns 21 through 25

                   0                   0                   0                   0                   0

  Columns 26 through 30

                   0                   0                   0                   0                   0

  Column 31

                   0


inner_code_BER =

  Columns 1 through 5

   0.410910238283889   0.402445829810032   0.392467447109873   0.380566412018356   0.366217026897481

  Columns 6 through 10

   0.348767607538045   0.327468443681922   0.301582235867148   0.270634823593091   0.234787523465536

  Columns 11 through 15

   0.195030608898406   0.152969767365648   0.111342411184112   0.073544745190684   0.039577945024544

  Columns 16 through 20

   0.017111391641080                   0                   0                   0                   0

  Columns 21 through 25

                   0                   0                   0                   0                   0

  Columns 26 through 30

                   0                   0                   0                   0                   0

  Column 31

                   0


outer_code_BER =

  Columns 1 through 5

   0.410910238283889   0.402445829810032   0.392467447109873   0.380566412018355   0.366217026897480

  Columns 6 through 10

   0.348767607538046   0.327468443681922   0.301582235867149   0.270634823593092   0.234787523465536

  Columns 11 through 15

   0.195030608898406   0.152969767365648   0.111342411184112   0.073544745190702   0.039577947849300

  Columns 16 through 20

   0.017111590370322                   0                   0                   0                   0

  Columns 21 through 25

                   0                   0                   0                   0                   0

  Columns 26 through 30

                   0                   0                   0                   0                   0

  Column 31

                   0


inner_code_BER =

  Columns 1 through 5

   0.410910238283889   0.402445829810032   0.392467447109873   0.380566412018356   0.366217026897481

  Columns 6 through 10

   0.348767607538045   0.327468443681922   0.301582235867148   0.270634823593091   0.234787523465536

  Columns 11 through 15

   0.195030608898406   0.152969767365648   0.111342411184112   0.073544745190684   0.039577945024544

  Columns 16 through 20

   0.017111391641080   0.002410253314888                   0                   0                   0

  Columns 21 through 25

                   0                   0                   0                   0                   0

  Columns 26 through 30

                   0                   0                   0                   0                   0

  Column 31

                   0


outer_code_BER =

  Columns 1 through 5

   0.410910238283889   0.402445829810032   0.392467447109873   0.380566412018355   0.366217026897480

  Columns 6 through 10

   0.348767607538046   0.327468443681922   0.301582235867149   0.270634823593092   0.234787523465536

  Columns 11 through 15

   0.195030608898406   0.152969767365648   0.111342411184112   0.073544745190702   0.039577947849300

  Columns 16 through 20

   0.017111590370322   0.000000000013987                   0                   0                   0

  Columns 21 through 25

                   0                   0                   0                   0                   0

  Columns 26 through 30

                   0                   0                   0                   0                   0

  Column 31

                   0

µ±Ç°ÍâÂëÎóÂëÂÊÒÑµÍÓÚÄ¿±êÎóÂëÂÊ£¬ÐÅÔë±ÈÎª0.60 dB

inner_code_BER =

  Columns 1 through 5

   0.410910238283889   0.402445829810032   0.392467447109873   0.380566412018356   0.366217026897481

  Columns 6 through 10

   0.348767607538045   0.327468443681922   0.301582235867148   0.270634823593091   0.234787523465536

  Columns 11 through 15

   0.195030608898406   0.152969767365648   0.111342411184112   0.073544745190684   0.039577945024544

  Columns 16 through 20

   0.017111391641080   0.002410253314888   0.001878736404001                   0                   0

  Columns 21 through 25

                   0                   0                   0                   0                   0

  Columns 26 through 30

                   0                   0                   0                   0                   0

  Column 31

                   0


inner_code_BER =

  Columns 1 through 5

   0.410910238283889   0.402445829810032   0.392467447109873   0.380566412018356   0.366217026897481

  Columns 6 through 10

   0.348767607538045   0.327468443681922   0.301582235867148   0.270634823593091   0.234787523465536

  Columns 11 through 15

   0.195030608898406   0.152969767365648   0.111342411184112   0.073544745190684   0.039577945024544

  Columns 16 through 20

   0.017111391641080   0.002410253314888   0.001878736404001   0.001533078039554                   0

  Columns 21 through 25

                   0                   0                   0                   0                   0

  Columns 26 through 30

                   0                   0                   0                   0                   0

  Column 31

                   0


inner_code_BER =

  Columns 1 through 5

   0.410910238283889   0.402445829810032   0.392467447109873   0.380566412018356   0.366217026897481

  Columns 6 through 10

   0.348767607538045   0.327468443681922   0.301582235867148   0.270634823593091   0.234787523465536

  Columns 11 through 15

   0.195030608898406   0.152969767365648   0.111342411184112   0.073544745190684   0.039577945024544

  Columns 16 through 20

   0.017111391641080   0.002410253314888   0.001878736404001   0.001533078039554   0.001282472403997

  Columns 21 through 25

                   0                   0                   0                   0                   0

  Columns 26 through 30

                   0                   0                   0                   0                   0

  Column 31

                   0


inner_code_BER =

  Columns 1 through 5

   0.410910238283889   0.402445829810032   0.392467447109873   0.380566412018356   0.366217026897481

  Columns 6 through 10

   0.348767607538045   0.327468443681922   0.301582235867148   0.270634823593091   0.234787523465536

  Columns 11 through 15

   0.195030608898406   0.152969767365648   0.111342411184112   0.073544745190684   0.039577945024544

  Columns 16 through 20

   0.017111391641080   0.002410253314888   0.001878736404001   0.001533078039554   0.001282472403997

  Columns 21 through 25

   0.001089977503384                   0                   0                   0                   0

  Columns 26 through 30

                   0                   0                   0                   0                   0

  Column 31

                   0


inner_code_BER =

  Columns 1 through 5

   0.410910238283889   0.402445829810032   0.392467447109873   0.380566412018356   0.366217026897481

  Columns 6 through 10

   0.348767607538045   0.327468443681922   0.301582235867148   0.270634823593091   0.234787523465536

  Columns 11 through 15

   0.195030608898406   0.152969767365648   0.111342411184112   0.073544745190684   0.039577945024544

  Columns 16 through 20

   0.017111391641080   0.002410253314888   0.001878736404001   0.001533078039554   0.001282472403997

  Columns 21 through 25

   0.001089977503384   0.000936689261927                   0                   0                   0

  Columns 26 through 30

                   0                   0                   0                   0                   0

  Column 31

                   0


inner_code_BER =

  Columns 1 through 5

   0.410910238283889   0.402445829810032   0.392467447109873   0.380566412018356   0.366217026897481

  Columns 6 through 10

   0.348767607538045   0.327468443681922   0.301582235867148   0.270634823593091   0.234787523465536

  Columns 11 through 15

   0.195030608898406   0.152969767365648   0.111342411184112   0.073544745190684   0.039577945024544

  Columns 16 through 20

   0.017111391641080   0.002410253314888   0.001878736404001   0.001533078039554   0.001282472403997

  Columns 21 through 25

   0.001089977503384   0.000936689261927   0.000811575277874                   0                   0

  Columns 26 through 30

                   0                   0                   0                   0                   0

  Column 31

                   0


inner_code_BER =

  Columns 1 through 5

   0.410910238283889   0.402445829810032   0.392467447109873   0.380566412018356   0.366217026897481

  Columns 6 through 10

   0.348767607538045   0.327468443681922   0.301582235867148   0.270634823593091   0.234787523465536

  Columns 11 through 15

   0.195030608898406   0.152969767365648   0.111342411184112   0.073544745190684   0.039577945024544

  Columns 16 through 20

   0.017111391641080   0.002410253314888   0.001878736404001   0.001533078039554   0.001282472403997

  Columns 21 through 25

   0.001089977503384   0.000936689261927   0.000811575277874   0.000707615280694                   0

  Columns 26 through 30

                   0                   0                   0                   0                   0

  Column 31

                   0


inner_code_BER =

  Columns 1 through 5

   0.410910238283889   0.402445829810032   0.392467447109873   0.380566412018356   0.366217026897481

  Columns 6 through 10

   0.348767607538045   0.327468443681922   0.301582235867148   0.270634823593091   0.234787523465536

  Columns 11 through 15

   0.195030608898406   0.152969767365648   0.111342411184112   0.073544745190684   0.039577945024544

  Columns 16 through 20

   0.017111391641080   0.002410253314888   0.001878736404001   0.001533078039554   0.001282472403997

  Columns 21 through 25

   0.001089977503384   0.000936689261927   0.000811575277874   0.000707615280694   0.000620058108495

  Columns 26 through 30

                   0                   0                   0                   0                   0

  Column 31

                   0


inner_code_BER =

  Columns 1 through 5

   0.410910238283889   0.402445829810032   0.392467447109873   0.380566412018356   0.366217026897481

  Columns 6 through 10

   0.348767607538045   0.327468443681922   0.301582235867148   0.270634823593091   0.234787523465536

  Columns 11 through 15

   0.195030608898406   0.152969767365648   0.111342411184112   0.073544745190684   0.039577945024544

  Columns 16 through 20

   0.017111391641080   0.002410253314888   0.001878736404001   0.001533078039554   0.001282472403997

  Columns 21 through 25

   0.001089977503384   0.000936689261927   0.000811575277874   0.000707615280694   0.000620058108495

  Columns 26 through 30

   0.000545536120652                   0                   0                   0                   0

  Column 31

                   0


inner_code_BER =

  Columns 1 through 5

   0.410910238283889   0.402445829810032   0.392467447109873   0.380566412018356   0.366217026897481

  Columns 6 through 10

   0.348767607538045   0.327468443681922   0.301582235867148   0.270634823593091   0.234787523465536

  Columns 11 through 15

   0.195030608898406   0.152969767365648   0.111342411184112   0.073544745190684   0.039577945024544

  Columns 16 through 20

   0.017111391641080   0.002410253314888   0.001878736404001   0.001533078039554   0.001282472403997

  Columns 21 through 25

   0.001089977503384   0.000936689261927   0.000811575277874   0.000707615280694   0.000620058108495

  Columns 26 through 30

   0.000545536120652   0.000481574842140                   0                   0                   0

  Column 31

                   0


inner_code_BER =

  Columns 1 through 5

   0.410910238283889   0.402445829810032   0.392467447109873   0.380566412018356   0.366217026897481

  Columns 6 through 10

   0.348767607538045   0.327468443681922   0.301582235867148   0.270634823593091   0.234787523465536

  Columns 11 through 15

   0.195030608898406   0.152969767365648   0.111342411184112   0.073544745190684   0.039577945024544

  Columns 16 through 20

   0.017111391641080   0.002410253314888   0.001878736404001   0.001533078039554   0.001282472403997

  Columns 21 through 25

   0.001089977503384   0.000936689261927   0.000811575277874   0.000707615280694   0.000620058108495

  Columns 26 through 30

   0.000545536120652   0.000481574842140   0.000426302957657                   0                   0

  Column 31

                   0


inner_code_BER =

  Columns 1 through 5

   0.410910238283889   0.402445829810032   0.392467447109873   0.380566412018356   0.366217026897481

  Columns 6 through 10

   0.348767607538045   0.327468443681922   0.301582235867148   0.270634823593091   0.234787523465536

  Columns 11 through 15

   0.195030608898406   0.152969767365648   0.111342411184112   0.073544745190684   0.039577945024544

  Columns 16 through 20

   0.017111391641080   0.002410253314888   0.001878736404001   0.001533078039554   0.001282472403997

  Columns 21 through 25

   0.001089977503384   0.000936689261927   0.000811575277874   0.000707615280694   0.000620058108495

  Columns 26 through 30

   0.000545536120652   0.000481574842140   0.000426302957657   0.000378271594924                   0

  Column 31

                   0


inner_code_BER =

  Columns 1 through 5

   0.410910238283889   0.402445829810032   0.392467447109873   0.380566412018356   0.366217026897481

  Columns 6 through 10

   0.348767607538045   0.327468443681922   0.301582235867148   0.270634823593091   0.234787523465536

  Columns 11 through 15

   0.195030608898406   0.152969767365648   0.111342411184112   0.073544745190684   0.039577945024544

  Columns 16 through 20

   0.017111391641080   0.002410253314888   0.001878736404001   0.001533078039554   0.001282472403997

  Columns 21 through 25

   0.001089977503384   0.000936689261927   0.000811575277874   0.000707615280694   0.000620058108495

  Columns 26 through 30

   0.000545536120652   0.000481574842140   0.000426302957657   0.000378271594924   0.000336336815823

  Column 31

                   0


inner_code_BER =

  Columns 1 through 5

   0.410910238283889   0.402445829810032   0.392467447109873   0.380566412018356   0.366217026897481

  Columns 6 through 10

   0.348767607538045   0.327468443681922   0.301582235867148   0.270634823593091   0.234787523465536

  Columns 11 through 15

   0.195030608898406   0.152969767365648   0.111342411184112   0.073544745190684   0.039577945024544

  Columns 16 through 20

   0.017111391641080   0.002410253314888   0.001878736404001   0.001533078039554   0.001282472403997

  Columns 21 through 25

   0.001089977503384   0.000936689261927   0.000811575277874   0.000707615280694   0.000620058108495

  Columns 26 through 30

   0.000545536120652   0.000481574842140   0.000426302957657   0.000378271594924   0.000336336815823

  Column 31

   0.000299580455950

Elapsed time is 13403.581813 seconds.
