# Supplementary material for: An Efficient Design of Systematic Rateless Codes
Source: Hindawi journal article supplement (doi:10.1155/2020/8068414), 2020-05-19
Supplement: f1 [file 8068414.f1.zip › supplementary files/Matlab_code_for_Figure1/BER_by_DDE/仿真结果/BER_by_DDE_awgn_rate_1_2_dist0_s.txt]

ÐÅµÀÎªAWGNÐÅµÀ

EbN0indB_vec =

  Columns 1 through 5

                   0   0.100000000000000   0.200000000000000   0.300000000000000   0.400000000000000

  Columns 6 through 10

   0.500000000000000   0.600000000000000   0.700000000000000   0.800000000000000   0.900000000000000

  Columns 11 through 15

   1.000000000000000   1.100000000000000   1.200000000000000   1.300000000000000   1.400000000000000

  Columns 16 through 20

   1.500000000000000   1.600000000000000   1.700000000000000   1.800000000000000   1.900000000000000

  Columns 21 through 25

   2.000000000000000   2.100000000000000   2.200000000000000   2.300000000000000   2.400000000000000

  Columns 26 through 30

   2.500000000000000   2.600000000000000   2.700000000000000   2.800000000000000   2.900000000000000

  Columns 31 through 35

   3.000000000000000   3.100000000000000   3.200000000000000   3.300000000000000   3.400000000000000

  Columns 36 through 40

   3.500000000000000   3.600000000000000   3.700000000000000   3.800000000000000   3.900000000000000

  Columns 41 through 45

   4.000000000000000   4.100000000000000   4.200000000000000   4.300000000000000   4.400000000000000

  Columns 46 through 50

   4.500000000000000   4.600000000000000   4.700000000000000   4.800000000000000   4.900000000000000

  Columns 51 through 55

   5.000000000000000   5.100000000000000   5.200000000000000   5.300000000000000   5.400000000000000

  Columns 56 through 60

   5.500000000000000   5.600000000000000   5.700000000000000   5.800000000000000   5.900000000000000

  Column 61

   6.000000000000000

ÖÆ±í³É¹¦
µ±Ç°Ñ¡ÔñRaptorÂëµ±Ç°Ñ¡ÔñÏµÍ³Âë
×ÜÂëÂÊ=0.50000, ÍâÂëÂëÂÊ=0.98039, ÄÚÂëÂëÂÊ=0.51000

out_node_index =

     1     2     3     4     5     8     9    19    65    66


ans =

  Columns 1 through 5

   0.007969000000000   0.493570000000000   0.166220000000000   0.072646000000000   0.082558000000000

  Columns 6 through 10

   0.056058000000000   0.037229000000000   0.055590000000000   0.025023000000000   0.003135000000000


ans =

  Columns 1 through 5

   0.007969000000000   0.493570000000000   0.166220000000000   0.072646000000000   0.082558000000000

  Columns 6 through 10

   0.056058000000000   0.037229000000000   0.055590000000000   0.025023000000000   0.003135000000000


inner_code_BER =

  Columns 1 through 5

   0.085155667120949                   0                   0                   0                   0

  Columns 6 through 10

                   0                   0                   0                   0                   0

  Columns 11 through 15

                   0                   0                   0                   0                   0

  Columns 16 through 20

                   0                   0                   0                   0                   0

  Columns 21 through 25

                   0                   0                   0                   0                   0

  Columns 26 through 30

                   0                   0                   0                   0                   0

  Columns 31 through 35

                   0                   0                   0                   0                   0

  Columns 36 through 40

                   0                   0                   0                   0                   0

  Columns 41 through 45

                   0                   0                   0                   0                   0

  Columns 46 through 50

                   0                   0                   0                   0                   0

  Columns 51 through 55

                   0                   0                   0                   0                   0

  Columns 56 through 60

                   0                   0                   0                   0                   0

  Column 61

                   0


outer_code_BER =

  Columns 1 through 5

   0.085155667120950                   0                   0                   0                   0

  Columns 6 through 10

                   0                   0                   0                   0                   0

  Columns 11 through 15

                   0                   0                   0                   0                   0

  Columns 16 through 20

                   0                   0                   0                   0                   0

  Columns 21 through 25

                   0                   0                   0                   0                   0

  Columns 26 through 30

                   0                   0                   0                   0                   0

  Columns 31 through 35

                   0                   0                   0                   0                   0

  Columns 36 through 40

                   0                   0                   0                   0                   0

  Columns 41 through 45

                   0                   0                   0                   0                   0

  Columns 46 through 50

                   0                   0                   0                   0                   0

  Columns 51 through 55

                   0                   0                   0                   0                   0

  Columns 56 through 60

                   0                   0                   0                   0                   0

  Column 61

                   0


inner_code_BER =

  Columns 1 through 5

   0.085155667120949   0.081407055164332                   0                   0                   0

  Columns 6 through 10

                   0                   0                   0                   0                   0

  Columns 11 through 15

                   0                   0                   0                   0                   0

  Columns 16 through 20

                   0                   0                   0                   0                   0

  Columns 21 through 25

                   0                   0                   0                   0                   0

  Columns 26 through 30

                   0                   0                   0                   0                   0

  Columns 31 through 35

                   0                   0                   0                   0                   0

  Columns 36 through 40

                   0                   0                   0                   0                   0

  Columns 41 through 45

                   0                   0                   0                   0                   0

  Columns 46 through 50

                   0                   0                   0                   0                   0

  Columns 51 through 55

                   0                   0                   0                   0                   0

  Columns 56 through 60

                   0                   0                   0                   0                   0

  Column 61

                   0


outer_code_BER =

  Columns 1 through 5

   0.085155667120950   0.081407055164337                   0                   0                   0

  Columns 6 through 10

                   0                   0                   0                   0                   0

  Columns 11 through 15

                   0                   0                   0                   0                   0

  Columns 16 through 20

                   0                   0                   0                   0                   0

  Columns 21 through 25

                   0                   0                   0                   0                   0

  Columns 26 through 30

                   0                   0                   0                   0                   0

  Columns 31 through 35

                   0                   0                   0                   0                   0

  Columns 36 through 40

                   0                   0                   0                   0                   0

  Columns 41 through 45

                   0                   0                   0                   0                   0

  Columns 46 through 50

                   0                   0                   0                   0                   0

  Columns 51 through 55

                   0                   0                   0                   0                   0

  Columns 56 through 60

                   0                   0                   0                   0                   0

  Column 61

                   0


inner_code_BER =

  Columns 1 through 5

   0.085155667120949   0.081407055164332   0.077694174471144                   0                   0

  Columns 6 through 10

                   0                   0                   0                   0                   0

  Columns 11 through 15

                   0                   0                   0                   0                   0

  Columns 16 through 20

                   0                   0                   0                   0                   0

  Columns 21 through 25

                   0                   0                   0                   0                   0

  Columns 26 through 30

                   0                   0                   0                   0                   0

  Columns 31 through 35

                   0                   0                   0                   0                   0

  Columns 36 through 40

                   0                   0                   0                   0                   0

  Columns 41 through 45

                   0                   0                   0                   0                   0

  Columns 46 through 50

                   0                   0                   0                   0                   0

  Columns 51 through 55

                   0                   0                   0                   0                   0

  Columns 56 through 60

                   0                   0                   0                   0                   0

  Column 61

                   0


outer_code_BER =

  Columns 1 through 5

   0.085155667120950   0.081407055164337   0.077694174471160                   0                   0

  Columns 6 through 10

                   0                   0                   0                   0                   0

  Columns 11 through 15

                   0                   0                   0                   0                   0

  Columns 16 through 20

                   0                   0                   0                   0                   0

  Columns 21 through 25

                   0                   0                   0                   0                   0

  Columns 26 through 30

                   0                   0                   0                   0                   0

  Columns 31 through 35

                   0                   0                   0                   0                   0

  Columns 36 through 40

                   0                   0                   0                   0                   0

  Columns 41 through 45

                   0                   0                   0                   0                   0

  Columns 46 through 50

                   0                   0                   0                   0                   0

  Columns 51 through 55

                   0                   0                   0                   0                   0

  Columns 56 through 60

                   0                   0                   0                   0                   0

  Column 61

                   0


inner_code_BER =

  Columns 1 through 5

   0.085155667120949   0.081407055164332   0.077694174471144   0.074020929706927                   0

  Columns 6 through 10

                   0                   0                   0                   0                   0

  Columns 11 through 15

                   0                   0                   0                   0                   0

  Columns 16 through 20

                   0                   0                   0                   0                   0

  Columns 21 through 25

                   0                   0                   0                   0                   0

  Columns 26 through 30

                   0                   0                   0                   0                   0

  Columns 31 through 35

                   0                   0                   0                   0                   0

  Columns 36 through 40

                   0                   0                   0                   0                   0

  Columns 41 through 45

                   0                   0                   0                   0                   0

  Columns 46 through 50

                   0                   0                   0                   0                   0

  Columns 51 through 55

                   0                   0                   0                   0                   0

  Columns 56 through 60

                   0                   0                   0                   0                   0

  Column 61

                   0


outer_code_BER =

  Columns 1 through 5

   0.085155667120950   0.081407055164337   0.077694174471160   0.074020929706985                   0

  Columns 6 through 10

                   0                   0                   0                   0                   0

  Columns 11 through 15

                   0                   0                   0                   0                   0

  Columns 16 through 20

                   0                   0                   0                   0                   0

  Columns 21 through 25

                   0                   0                   0                   0                   0

  Columns 26 through 30

                   0                   0                   0                   0                   0

  Columns 31 through 35

                   0                   0                   0                   0                   0

  Columns 36 through 40

                   0                   0                   0                   0                   0

  Columns 41 through 45

                   0                   0                   0                   0                   0

  Columns 46 through 50

                   0                   0                   0                   0                   0

  Columns 51 through 55

                   0                   0                   0                   0                   0

  Columns 56 through 60

                   0                   0                   0                   0                   0

  Column 61

                   0


inner_code_BER =

  Columns 1 through 5

   0.085155667120949   0.081407055164332   0.077694174471144   0.074020929706927   0.070391314810034

  Columns 6 through 10

                   0                   0                   0                   0                   0

  Columns 11 through 15

                   0                   0                   0                   0                   0

  Columns 16 through 20

                   0                   0                   0                   0                   0

  Columns 21 through 25

                   0                   0                   0                   0                   0

  Columns 26 through 30

                   0                   0                   0                   0                   0

  Columns 31 through 35

                   0                   0                   0                   0                   0

  Columns 36 through 40

                   0                   0                   0                   0                   0

  Columns 41 through 45

                   0                   0                   0                   0                   0

  Columns 46 through 50

                   0                   0                   0                   0                   0

  Columns 51 through 55

                   0                   0                   0                   0                   0

  Columns 56 through 60

                   0                   0                   0                   0                   0

  Column 61

                   0


outer_code_BER =

  Columns 1 through 5

   0.085155667120950   0.081407055164337   0.077694174471160   0.074020929706985   0.070391314810242

  Columns 6 through 10

                   0                   0                   0                   0                   0

  Columns 11 through 15

                   0                   0                   0                   0                   0

  Columns 16 through 20

                   0                   0                   0                   0                   0

  Columns 21 through 25

                   0                   0                   0                   0                   0

  Columns 26 through 30

                   0                   0                   0                   0                   0

  Columns 31 through 35

                   0                   0                   0                   0                   0

  Columns 36 through 40

                   0                   0                   0                   0                   0

  Columns 41 through 45

                   0                   0                   0                   0                   0

  Columns 46 through 50

                   0                   0                   0                   0                   0

  Columns 51 through 55

                   0                   0                   0                   0                   0

  Columns 56 through 60

                   0                   0                   0                   0                   0

  Column 61

                   0


inner_code_BER =

  Columns 1 through 5

   0.085155667120949   0.081407055164332   0.077694174471144   0.074020929706927   0.070391314810034

  Columns 6 through 10

   0.066809437833591                   0                   0                   0                   0

  Columns 11 through 15

                   0                   0                   0                   0                   0

  Columns 16 through 20

                   0                   0                   0                   0                   0

  Columns 21 through 25

                   0                   0                   0                   0                   0

  Columns 26 through 30

                   0                   0                   0                   0                   0

  Columns 31 through 35

                   0                   0                   0                   0                   0

  Columns 36 through 40

                   0                   0                   0                   0                   0

  Columns 41 through 45

                   0                   0                   0                   0                   0

  Columns 46 through 50

                   0                   0                   0                   0                   0

  Columns 51 through 55

                   0                   0                   0                   0                   0

  Columns 56 through 60

                   0                   0                   0                   0                   0

  Column 61

                   0


outer_code_BER =

  Columns 1 through 5

   0.085155667120950   0.081407055164337   0.077694174471160   0.074020929706985   0.070391314810242

  Columns 6 through 10

   0.066809437834306                   0                   0                   0                   0

  Columns 11 through 15

                   0                   0                   0                   0                   0

  Columns 16 through 20

                   0                   0                   0                   0                   0

  Columns 21 through 25

                   0                   0                   0                   0                   0

  Columns 26 through 30

                   0                   0                   0                   0                   0

  Columns 31 through 35

                   0                   0                   0                   0                   0

  Columns 36 through 40

                   0                   0                   0                   0                   0

  Columns 41 through 45

                   0                   0                   0                   0                   0

  Columns 46 through 50

                   0                   0                   0                   0                   0

  Columns 51 through 55

                   0                   0                   0                   0                   0

  Columns 56 through 60

                   0                   0                   0                   0                   0

  Column 61

                   0


inner_code_BER =

  Columns 1 through 5

   0.085155667120949   0.081407055164332   0.077694174471144   0.074020929706927   0.070391314810034

  Columns 6 through 10

   0.066809437833591   0.063279557865719                   0                   0                   0

  Columns 11 through 15

                   0                   0                   0                   0                   0

  Columns 16 through 20

                   0                   0                   0                   0                   0

  Columns 21 through 25

                   0                   0                   0                   0                   0

  Columns 26 through 30

                   0                   0                   0                   0                   0

  Columns 31 through 35

                   0                   0                   0                   0                   0

  Columns 36 through 40

                   0                   0                   0                   0                   0

  Columns 41 through 45

                   0                   0                   0                   0                   0

  Columns 46 through 50

                   0                   0                   0                   0                   0

  Columns 51 through 55

                   0                   0                   0                   0                   0

  Columns 56 through 60

                   0                   0                   0                   0                   0

  Column 61

                   0


outer_code_BER =

  Columns 1 through 5

   0.085155667120950   0.081407055164337   0.077694174471160   0.074020929706985   0.070391314810242

  Columns 6 through 10

   0.066809437834306   0.063279557868078                   0                   0                   0

  Columns 11 through 15

                   0                   0                   0                   0                   0

  Columns 16 through 20

                   0                   0                   0                   0                   0

  Columns 21 through 25

                   0                   0                   0                   0                   0

  Columns 26 through 30

                   0                   0                   0                   0                   0

  Columns 31 through 35

                   0                   0                   0                   0                   0

  Columns 36 through 40

                   0                   0                   0                   0                   0

  Columns 41 through 45

                   0                   0                   0                   0                   0

  Columns 46 through 50

                   0                   0                   0                   0                   0

  Columns 51 through 55

                   0                   0                   0                   0                   0

  Columns 56 through 60

                   0                   0                   0                   0                   0

  Column 61

                   0


inner_code_BER =

  Columns 1 through 5

   0.085155667120949   0.081407055164332   0.077694174471144   0.074020929706927   0.070391314810034

  Columns 6 through 10

   0.066809437833591   0.063279557865719   0.059806133434610                   0                   0

  Columns 11 through 15

                   0                   0                   0                   0                   0

  Columns 16 through 20

                   0                   0                   0                   0                   0

  Columns 21 through 25

                   0                   0                   0                   0                   0

  Columns 26 through 30

                   0                   0                   0                   0                   0

  Columns 31 through 35

                   0                   0                   0                   0                   0

  Columns 36 through 40

                   0                   0                   0                   0                   0

  Columns 41 through 45

                   0                   0                   0                   0                   0

  Columns 46 through 50

                   0                   0                   0                   0                   0

  Columns 51 through 55

                   0                   0                   0                   0                   0

  Columns 56 through 60

                   0                   0                   0                   0                   0

  Column 61

                   0


outer_code_BER =

  Columns 1 through 5

   0.085155667120950   0.081407055164337   0.077694174471160   0.074020929706985   0.070391314810242

  Columns 6 through 10

   0.066809437834306   0.063279557868078   0.059806133442090                   0                   0

  Columns 11 through 15

                   0                   0                   0                   0                   0

  Columns 16 through 20

                   0                   0                   0                   0                   0

  Columns 21 through 25

                   0                   0                   0                   0                   0

  Columns 26 through 30

                   0                   0                   0                   0                   0

  Columns 31 through 35

                   0                   0                   0                   0                   0

  Columns 36 through 40

                   0                   0                   0                   0                   0

  Columns 41 through 45

                   0                   0                   0                   0                   0

  Columns 46 through 50

                   0                   0                   0                   0                   0

  Columns 51 through 55

                   0                   0                   0                   0                   0

  Columns 56 through 60

                   0                   0                   0                   0                   0

  Column 61

                   0


inner_code_BER =

  Columns 1 through 5

   0.085155667120949   0.081407055164332   0.077694174471144   0.074020929706927   0.070391314810034

  Columns 6 through 10

   0.066809437833591   0.063279557865719   0.059806133434610   0.056393879158999                   0

  Columns 11 through 15

                   0                   0                   0                   0                   0

  Columns 16 through 20

                   0                   0                   0                   0                   0

  Columns 21 through 25

                   0                   0                   0                   0                   0

  Columns 26 through 30

                   0                   0                   0                   0                   0

  Columns 31 through 35

                   0                   0                   0                   0                   0

  Columns 36 through 40

                   0                   0                   0                   0                   0

  Columns 41 through 45

                   0                   0                   0                   0                   0

  Columns 46 through 50

                   0                   0                   0                   0                   0

  Columns 51 through 55

                   0                   0                   0                   0                   0

  Columns 56 through 60

                   0                   0                   0                   0                   0

  Column 61

                   0


outer_code_BER =

  Columns 1 through 5

   0.085155667120950   0.081407055164337   0.077694174471160   0.074020929706985   0.070391314810242

  Columns 6 through 10

   0.066809437834306   0.063279557868078   0.059806133442090   0.056393879181767                   0

  Columns 11 through 15

                   0                   0                   0                   0                   0

  Columns 16 through 20

                   0                   0                   0                   0                   0

  Columns 21 through 25

                   0                   0                   0                   0                   0

  Columns 26 through 30

                   0                   0                   0                   0                   0

  Columns 31 through 35

                   0                   0                   0                   0                   0

  Columns 36 through 40

                   0                   0                   0                   0                   0

  Columns 41 through 45

                   0                   0                   0                   0                   0

  Columns 46 through 50

                   0                   0                   0                   0                   0

  Columns 51 through 55

                   0                   0                   0                   0                   0

  Columns 56 through 60

                   0                   0                   0                   0                   0

  Column 61

                   0


inner_code_BER =

  Columns 1 through 5

   0.085155667120949   0.081407055164332   0.077694174471144   0.074020929706927   0.070391314810034

  Columns 6 through 10

   0.066809437833591   0.063279557865719   0.059806133434610   0.056393879158999   0.053047823435821

  Columns 11 through 15

                   0                   0                   0                   0                   0

  Columns 16 through 20

                   0                   0                   0                   0                   0

  Columns 21 through 25

                   0                   0                   0                   0                   0

  Columns 26 through 30

                   0                   0                   0                   0                   0

  Columns 31 through 35

                   0                   0                   0                   0                   0

  Columns 36 through 40

                   0                   0                   0                   0                   0

  Columns 41 through 45

                   0                   0                   0                   0                   0

  Columns 46 through 50

                   0                   0                   0                   0                   0

  Columns 51 through 55

                   0                   0                   0                   0                   0

  Columns 56 through 60

                   0                   0                   0                   0                   0

  Column 61

                   0


outer_code_BER =

  Columns 1 through 5

   0.085155667120950   0.081407055164337   0.077694174471160   0.074020929706985   0.070391314810242

  Columns 6 through 10

   0.066809437834306   0.063279557868078   0.059806133442090   0.056393879181767   0.053047823502301

  Columns 11 through 15

                   0                   0                   0                   0                   0

  Columns 16 through 20

                   0                   0                   0                   0                   0

  Columns 21 through 25

                   0                   0                   0                   0                   0

  Columns 26 through 30

                   0                   0                   0                   0                   0

  Columns 31 through 35

                   0                   0                   0                   0                   0

  Columns 36 through 40

                   0                   0                   0                   0                   0

  Columns 41 through 45

                   0                   0                   0                   0                   0

  Columns 46 through 50

                   0                   0                   0                   0                   0

  Columns 51 through 55

                   0                   0                   0                   0                   0

  Columns 56 through 60

                   0                   0                   0                   0                   0

  Column 61

                   0


inner_code_BER =

  Columns 1 through 5

   0.085155667120949   0.081407055164332   0.077694174471144   0.074020929706927   0.070391314810034

  Columns 6 through 10

   0.066809437833591   0.063279557865719   0.059806133434610   0.056393879158999   0.053047823435821

  Columns 11 through 15

   0.049773354587201                   0                   0                   0                   0

  Columns 16 through 20

                   0                   0                   0                   0                   0

  Columns 21 through 25

                   0                   0                   0                   0                   0

  Columns 26 through 30

                   0                   0                   0                   0                   0

  Columns 31 through 35

                   0                   0                   0                   0                   0

  Columns 36 through 40

                   0                   0                   0                   0                   0

  Columns 41 through 45

                   0                   0                   0                   0                   0

  Columns 46 through 50

                   0                   0                   0                   0                   0

  Columns 51 through 55

                   0                   0                   0                   0                   0

  Columns 56 through 60

                   0                   0                   0                   0                   0

  Column 61

                   0


outer_code_BER =

  Columns 1 through 5

   0.085155667120950   0.081407055164337   0.077694174471160   0.074020929706985   0.070391314810242

  Columns 6 through 10

   0.066809437834306   0.063279557868078   0.059806133442090   0.056393879181767   0.053047823502301

  Columns 11 through 15

   0.049773354773248                   0                   0                   0                   0

  Columns 16 through 20

                   0                   0                   0                   0                   0

  Columns 21 through 25

                   0                   0                   0                   0                   0

  Columns 26 through 30

                   0                   0                   0                   0                   0

  Columns 31 through 35

                   0                   0                   0                   0                   0

  Columns 36 through 40

                   0                   0                   0                   0                   0

  Columns 41 through 45

                   0                   0                   0                   0                   0

  Columns 46 through 50

                   0                   0                   0                   0                   0

  Columns 51 through 55

                   0                   0                   0                   0                   0

  Columns 56 through 60

                   0                   0                   0                   0                   0

  Column 61

                   0


inner_code_BER =

  Columns 1 through 5

   0.085155667120949   0.081407055164332   0.077694174471144   0.074020929706927   0.070391314810034

  Columns 6 through 10

   0.066809437833591   0.063279557865719   0.059806133434610   0.056393879158999   0.053047823435821

  Columns 11 through 15

   0.049773354587201   0.046576236558964                   0                   0                   0

  Columns 16 through 20

                   0                   0                   0                   0                   0

  Columns 21 through 25

                   0                   0                   0                   0                   0

  Columns 26 through 30

                   0                   0                   0                   0                   0

  Columns 31 through 35

                   0                   0                   0                   0                   0

  Columns 36 through 40

                   0                   0                   0                   0                   0

  Columns 41 through 45

                   0                   0                   0                   0                   0

  Columns 46 through 50

                   0                   0                   0                   0                   0

  Columns 51 through 55

                   0                   0                   0                   0                   0

  Columns 56 through 60

                   0                   0                   0                   0                   0

  Column 61

                   0


outer_code_BER =

  Columns 1 through 5

   0.085155667120950   0.081407055164337   0.077694174471160   0.074020929706985   0.070391314810242

  Columns 6 through 10

   0.066809437834306   0.063279557868078   0.059806133442090   0.056393879181767   0.053047823502301

  Columns 11 through 15

   0.049773354773248   0.046576237057480                   0                   0                   0

  Columns 16 through 20

                   0                   0                   0                   0                   0

  Columns 21 through 25

                   0                   0                   0                   0                   0

  Columns 26 through 30

                   0                   0                   0                   0                   0

  Columns 31 through 35

                   0                   0                   0                   0                   0

  Columns 36 through 40

                   0                   0                   0                   0                   0

  Columns 41 through 45

                   0                   0                   0                   0                   0

  Columns 46 through 50

                   0                   0                   0                   0                   0

  Columns 51 through 55

                   0                   0                   0                   0                   0

  Columns 56 through 60

                   0                   0                   0                   0                   0

  Column 61

                   0


inner_code_BER =

  Columns 1 through 5

   0.085155667120949   0.081407055164332   0.077694174471144   0.074020929706927   0.070391314810034

  Columns 6 through 10

   0.066809437833591   0.063279557865719   0.059806133434610   0.056393879158999   0.053047823435821

  Columns 11 through 15

   0.049773354587201   0.046576236558964   0.043462569379817                   0                   0

  Columns 16 through 20

                   0                   0                   0                   0                   0

  Columns 21 through 25

                   0                   0                   0                   0                   0

  Columns 26 through 30

                   0                   0                   0                   0                   0

  Columns 31 through 35

                   0                   0                   0                   0                   0

  Columns 36 through 40

                   0                   0                   0                   0                   0

  Columns 41 through 45

                   0                   0                   0                   0                   0

  Columns 46 through 50

                   0                   0                   0                   0                   0

  Columns 51 through 55

                   0                   0                   0                   0                   0

  Columns 56 through 60

                   0                   0                   0                   0                   0

  Column 61

                   0


outer_code_BER =

  Columns 1 through 5

   0.085155667120950   0.081407055164337   0.077694174471160   0.074020929706985   0.070391314810242

  Columns 6 through 10

   0.066809437834306   0.063279557868078   0.059806133442090   0.056393879181767   0.053047823502301

  Columns 11 through 15

   0.049773354773248   0.046576237057480   0.043462570657259                   0                   0

  Columns 16 through 20

                   0                   0                   0                   0                   0

  Columns 21 through 25

                   0                   0                   0                   0                   0

  Columns 26 through 30

                   0                   0                   0                   0                   0

  Columns 31 through 35

                   0                   0                   0                   0                   0

  Columns 36 through 40

                   0                   0                   0                   0                   0

  Columns 41 through 45

                   0                   0                   0                   0                   0

  Columns 46 through 50

                   0                   0                   0                   0                   0

  Columns 51 through 55

                   0                   0                   0                   0                   0

  Columns 56 through 60

                   0                   0                   0                   0                   0

  Column 61

                   0


inner_code_BER =

  Columns 1 through 5

   0.085155667120949   0.081407055164332   0.077694174471144   0.074020929706927   0.070391314810034

  Columns 6 through 10

   0.066809437833591   0.063279557865719   0.059806133434610   0.056393879158999   0.053047823435821

  Columns 11 through 15

   0.049773354587201   0.046576236558964   0.043462569379817   0.040438666902034                   0

  Columns 16 through 20

                   0                   0                   0                   0                   0

  Columns 21 through 25

                   0                   0                   0                   0                   0

  Columns 26 through 30

                   0                   0                   0                   0                   0

  Columns 31 through 35

                   0                   0                   0                   0                   0

  Columns 36 through 40

                   0                   0                   0                   0                   0

  Columns 41 through 45

                   0                   0                   0                   0                   0

  Columns 46 through 50

                   0                   0                   0                   0                   0

  Columns 51 through 55

                   0                   0                   0                   0                   0

  Columns 56 through 60

                   0                   0                   0                   0                   0

  Column 61

                   0


outer_code_BER =

  Columns 1 through 5

   0.085155667120950   0.081407055164337   0.077694174471160   0.074020929706985   0.070391314810242

  Columns 6 through 10

   0.066809437834306   0.063279557868078   0.059806133442090   0.056393879181767   0.053047823502301

  Columns 11 through 15

   0.049773354773248   0.046576237057480   0.043462570657259   0.040438670028046                   0

  Columns 16 through 20

                   0                   0                   0                   0                   0

  Columns 21 through 25

                   0                   0                   0                   0                   0

  Columns 26 through 30

                   0                   0                   0                   0                   0

  Columns 31 through 35

                   0                   0                   0                   0                   0

  Columns 36 through 40

                   0                   0                   0                   0                   0

  Columns 41 through 45

                   0                   0                   0                   0                   0

  Columns 46 through 50

                   0                   0                   0                   0                   0

  Columns 51 through 55

                   0                   0                   0                   0                   0

  Columns 56 through 60

                   0                   0                   0                   0                   0

  Column 61

                   0


inner_code_BER =

  Columns 1 through 5

   0.085155667120949   0.081407055164332   0.077694174471144   0.074020929706927   0.070391314810034

  Columns 6 through 10

   0.066809437833591   0.063279557865719   0.059806133434610   0.056393879158999   0.053047823435821

  Columns 11 through 15

   0.049773354587201   0.046576236558964   0.043462569379817   0.040438666902034   0.037510828772315

  Columns 16 through 20

                   0                   0                   0                   0                   0

  Columns 21 through 25

                   0                   0                   0                   0                   0

  Columns 26 through 30

                   0                   0                   0                   0                   0

  Columns 31 through 35

                   0                   0                   0                   0                   0

  Columns 36 through 40

                   0                   0                   0                   0                   0

  Columns 41 through 45

                   0                   0                   0                   0                   0

  Columns 46 through 50

                   0                   0                   0                   0                   0

  Columns 51 through 55

                   0                   0                   0                   0                   0

  Columns 56 through 60

                   0                   0                   0                   0                   0

  Column 61

                   0


outer_code_BER =

  Columns 1 through 5

   0.085155667120950   0.081407055164337   0.077694174471160   0.074020929706985   0.070391314810242

  Columns 6 through 10

   0.066809437834306   0.063279557868078   0.059806133442090   0.056393879181767   0.053047823502301

  Columns 11 through 15

   0.049773354773248   0.046576237057480   0.043462570657259   0.040438670028046   0.037510836065144

  Columns 16 through 20

                   0                   0                   0                   0                   0

  Columns 21 through 25

                   0                   0                   0                   0                   0

  Columns 26 through 30

                   0                   0                   0                   0                   0

  Columns 31 through 35

                   0                   0                   0                   0                   0

  Columns 36 through 40

                   0                   0                   0                   0                   0

  Columns 41 through 45

                   0                   0                   0                   0                   0

  Columns 46 through 50

                   0                   0                   0                   0                   0

  Columns 51 through 55

                   0                   0                   0                   0                   0

  Columns 56 through 60

                   0                   0                   0                   0                   0

  Column 61

                   0


inner_code_BER =

  Columns 1 through 5

   0.085155667120949   0.081407055164332   0.077694174471144   0.074020929706927   0.070391314810034

  Columns 6 through 10

   0.066809437833591   0.063279557865719   0.059806133434610   0.056393879158999   0.053047823435821

  Columns 11 through 15

   0.049773354587201   0.046576236558964   0.043462569379817   0.040438666902034   0.037510828772315

  Columns 16 through 20

   0.034684998884867                   0                   0                   0                   0

  Columns 21 through 25

                   0                   0                   0                   0                   0

  Columns 26 through 30

                   0                   0                   0                   0                   0

  Columns 31 through 35

                   0                   0                   0                   0                   0

  Columns 36 through 40

                   0                   0                   0                   0                   0

  Columns 41 through 45

                   0                   0                   0                   0                   0

  Columns 46 through 50

                   0                   0                   0                   0                   0

  Columns 51 through 55

                   0                   0                   0                   0                   0

  Columns 56 through 60

                   0                   0                   0                   0                   0

  Column 61

                   0


outer_code_BER =

  Columns 1 through 5

   0.085155667120950   0.081407055164337   0.077694174471160   0.074020929706985   0.070391314810242

  Columns 6 through 10

   0.066809437834306   0.063279557868078   0.059806133442090   0.056393879181767   0.053047823502301

  Columns 11 through 15

   0.049773354773248   0.046576237057480   0.043462570657259   0.040438670028046   0.037510836065144

  Columns 16 through 20

   0.034685015072667                   0                   0                   0                   0

  Columns 21 through 25

                   0                   0                   0                   0                   0

  Columns 26 through 30

                   0                   0                   0                   0                   0

  Columns 31 through 35

                   0                   0                   0                   0                   0

  Columns 36 through 40

                   0                   0                   0                   0                   0

  Columns 41 through 45

                   0                   0                   0                   0                   0

  Columns 46 through 50

                   0                   0                   0                   0                   0

  Columns 51 through 55

                   0                   0                   0                   0                   0

  Columns 56 through 60

                   0                   0                   0                   0                   0

  Column 61

                   0


inner_code_BER =

  Columns 1 through 5

   0.085155667120949   0.081407055164332   0.077694174471144   0.074020929706927   0.070391314810034

  Columns 6 through 10

   0.066809437833591   0.063279557865719   0.059806133434610   0.056393879158999   0.053047823435821

  Columns 11 through 15

   0.049773354587201   0.046576236558964   0.043462569379817   0.040438666902034   0.037510828772315

  Columns 16 through 20

   0.034684998884867   0.031966329609640                   0                   0                   0

  Columns 21 through 25

                   0                   0                   0                   0                   0

  Columns 26 through 30

                   0                   0                   0                   0                   0

  Columns 31 through 35

                   0                   0                   0                   0                   0

  Columns 36 through 40

                   0                   0                   0                   0                   0

  Columns 41 through 45

                   0                   0                   0                   0                   0

  Columns 46 through 50

                   0                   0                   0                   0                   0

  Columns 51 through 55

                   0                   0                   0                   0                   0

  Columns 56 through 60

                   0                   0                   0                   0                   0

  Column 61

                   0


outer_code_BER =

  Columns 1 through 5

   0.085155667120950   0.081407055164337   0.077694174471160   0.074020929706985   0.070391314810242

  Columns 6 through 10

   0.066809437834306   0.063279557868078   0.059806133442090   0.056393879181767   0.053047823502301

  Columns 11 through 15

   0.049773354773248   0.046576237057480   0.043462570657259   0.040438670028046   0.037510836065144

  Columns 16 through 20

   0.034685015072667   0.031966363712906                   0                   0                   0

  Columns 21 through 25

                   0                   0                   0                   0                   0

  Columns 26 through 30

                   0                   0                   0                   0                   0

  Columns 31 through 35

                   0                   0                   0                   0                   0

  Columns 36 through 40

                   0                   0                   0                   0                   0

  Columns 41 through 45

                   0                   0                   0                   0                   0

  Columns 46 through 50

                   0                   0                   0                   0                   0

  Columns 51 through 55

                   0                   0                   0                   0                   0

  Columns 56 through 60

                   0                   0                   0                   0                   0

  Column 61

                   0


inner_code_BER =

  Columns 1 through 5

   0.085155667120949   0.081407055164332   0.077694174471144   0.074020929706927   0.070391314810034

  Columns 6 through 10

   0.066809437833591   0.063279557865719   0.059806133434610   0.056393879158999   0.053047823435821

  Columns 11 through 15

   0.049773354587201   0.046576236558964   0.043462569379817   0.040438666902034   0.037510828772315

  Columns 16 through 20

   0.034684998884867   0.031966329609640   0.029358704811556                   0                   0

  Columns 21 through 25

                   0                   0                   0                   0                   0

  Columns 26 through 30

                   0                   0                   0                   0                   0

  Columns 31 through 35

                   0                   0                   0                   0                   0

  Columns 36 through 40

                   0                   0                   0                   0                   0

  Columns 41 through 45

                   0                   0                   0                   0                   0

  Columns 46 through 50

                   0                   0                   0                   0                   0

  Columns 51 through 55

                   0                   0                   0                   0                   0

  Columns 56 through 60

                   0                   0                   0                   0                   0

  Column 61

                   0


outer_code_BER =

  Columns 1 through 5

   0.085155667120950   0.081407055164337   0.077694174471160   0.074020929706985   0.070391314810242

  Columns 6 through 10

   0.066809437834306   0.063279557868078   0.059806133442090   0.056393879181767   0.053047823502301

  Columns 11 through 15

   0.049773354773248   0.046576237057480   0.043462570657259   0.040438670028046   0.037510836065144

  Columns 16 through 20

   0.034685015072667   0.031966363712906   0.029358772777493                   0                   0

  Columns 21 through 25

                   0                   0                   0                   0                   0

  Columns 26 through 30

                   0                   0                   0                   0                   0

  Columns 31 through 35

                   0                   0                   0                   0                   0

  Columns 36 through 40

                   0                   0                   0                   0                   0

  Columns 41 through 45

                   0                   0                   0                   0                   0

  Columns 46 through 50

                   0                   0                   0                   0                   0

  Columns 51 through 55

                   0                   0                   0                   0                   0

  Columns 56 through 60

                   0                   0                   0                   0                   0

  Column 61

                   0


inner_code_BER =

  Columns 1 through 5

   0.085155667120949   0.081407055164332   0.077694174471144   0.074020929706927   0.070391314810034

  Columns 6 through 10

   0.066809437833591   0.063279557865719   0.059806133434610   0.056393879158999   0.053047823435821

  Columns 11 through 15

   0.049773354587201   0.046576236558964   0.043462569379817   0.040438666902034   0.037510828772315

  Columns 16 through 20

   0.034684998884867   0.031966329609640   0.029358704811556   0.026864303594123                   0

  Columns 21 through 25

                   0                   0                   0                   0                   0

  Columns 26 through 30

                   0                   0                   0                   0                   0

  Columns 31 through 35

                   0                   0                   0                   0                   0

  Columns 36 through 40

                   0                   0                   0                   0                   0

  Columns 41 through 45

                   0                   0                   0                   0                   0

  Columns 46 through 50

                   0                   0                   0                   0                   0

  Columns 51 through 55

                   0                   0                   0                   0                   0

  Columns 56 through 60

                   0                   0                   0                   0                   0

  Column 61

                   0


outer_code_BER =

  Columns 1 through 5

   0.085155667120950   0.081407055164337   0.077694174471160   0.074020929706985   0.070391314810242

  Columns 6 through 10

   0.066809437834306   0.063279557868078   0.059806133442090   0.056393879181767   0.053047823502301

  Columns 11 through 15

   0.049773354773248   0.046576237057480   0.043462570657259   0.040438670028046   0.037510836065144

  Columns 16 through 20

   0.034685015072667   0.031966363712906   0.029358772777493   0.026864431085577                   0

  Columns 21 through 25

                   0                   0                   0                   0                   0

  Columns 26 through 30

                   0                   0                   0                   0                   0

  Columns 31 through 35

                   0                   0                   0                   0                   0

  Columns 36 through 40

                   0                   0                   0                   0                   0

  Columns 41 through 45

                   0                   0                   0                   0                   0

  Columns 46 through 50

                   0                   0                   0                   0                   0

  Columns 51 through 55

                   0                   0                   0                   0                   0

  Columns 56 through 60

                   0                   0                   0                   0                   0

  Column 61

                   0


inner_code_BER =

  Columns 1 through 5

   0.085155667120949   0.081407055164332   0.077694174471144   0.074020929706927   0.070391314810034

  Columns 6 through 10

   0.066809437833591   0.063279557865719   0.059806133434610   0.056393879158999   0.053047823435821

  Columns 11 through 15

   0.049773354587201   0.046576236558964   0.043462569379817   0.040438666902034   0.037510828772315

  Columns 16 through 20

   0.034684998884867   0.031966329609640   0.029358704811556   0.026864303594123   0.024483297577252

  Columns 21 through 25

                   0                   0                   0                   0                   0

  Columns 26 through 30

                   0                   0                   0                   0                   0

  Columns 31 through 35

                   0                   0                   0                   0                   0

  Columns 36 through 40

                   0                   0                   0                   0                   0

  Columns 41 through 45

                   0                   0                   0                   0                   0

  Columns 46 through 50

                   0                   0                   0                   0                   0

  Columns 51 through 55

                   0                   0                   0                   0                   0

  Columns 56 through 60

                   0                   0                   0                   0                   0

  Column 61

                   0


outer_code_BER =

  Columns 1 through 5

   0.085155667120950   0.081407055164337   0.077694174471160   0.074020929706985   0.070391314810242

  Columns 6 through 10

   0.066809437834306   0.063279557868078   0.059806133442090   0.056393879181767   0.053047823502301

  Columns 11 through 15

   0.049773354773248   0.046576237057480   0.043462570657259   0.040438670028046   0.037510836065144

  Columns 16 through 20

   0.034685015072667   0.031966363712906   0.029358772777493   0.026864431085577   0.024483520626156

  Columns 21 through 25

                   0                   0                   0                   0                   0

  Columns 26 through 30

                   0                   0                   0                   0                   0

  Columns 31 through 35

                   0                   0                   0                   0                   0

  Columns 36 through 40

                   0                   0                   0                   0                   0

  Columns 41 through 45

                   0                   0                   0                   0                   0

  Columns 46 through 50

                   0                   0                   0                   0                   0

  Columns 51 through 55

                   0                   0                   0                   0                   0

  Columns 56 through 60

                   0                   0                   0                   0                   0

  Column 61

                   0


inner_code_BER =

  Columns 1 through 5

   0.085155667120949   0.081407055164332   0.077694174471144   0.074020929706927   0.070391314810034

  Columns 6 through 10

   0.066809437833591   0.063279557865719   0.059806133434610   0.056393879158999   0.053047823435821

  Columns 11 through 15

   0.049773354587201   0.046576236558964   0.043462569379817   0.040438666902034   0.037510828772315

  Columns 16 through 20

   0.034684998884867   0.031966329609640   0.029358704811556   0.026864303594123   0.024483297577252

  Columns 21 through 25

   0.022213761305949                   0                   0                   0                   0

  Columns 26 through 30

                   0                   0                   0                   0                   0

  Columns 31 through 35

                   0                   0                   0                   0                   0

  Columns 36 through 40

                   0                   0                   0                   0                   0

  Columns 41 through 45

                   0                   0                   0                   0                   0

  Columns 46 through 50

                   0                   0                   0                   0                   0

  Columns 51 through 55

                   0                   0                   0                   0                   0

  Columns 56 through 60

                   0                   0                   0                   0                   0

  Column 61

                   0


outer_code_BER =

  Columns 1 through 5

   0.085155667120950   0.081407055164337   0.077694174471160   0.074020929706985   0.070391314810242

  Columns 6 through 10

   0.066809437834306   0.063279557868078   0.059806133442090   0.056393879181767   0.053047823502301

  Columns 11 through 15

   0.049773354773248   0.046576237057480   0.043462570657259   0.040438670028046   0.037510836065144

  Columns 16 through 20

   0.034685015072667   0.031966363712906   0.029358772777493   0.026864431085577   0.024483520626156

  Columns 21 through 25

   0.022214118313113                   0                   0                   0                   0

  Columns 26 through 30

                   0                   0                   0                   0                   0

  Columns 31 through 35

                   0                   0                   0                   0                   0

  Columns 36 through 40

                   0                   0                   0                   0                   0

  Columns 41 through 45

                   0                   0                   0                   0                   0

  Columns 46 through 50

                   0                   0                   0                   0                   0

  Columns 51 through 55

                   0                   0                   0                   0                   0

  Columns 56 through 60

                   0                   0                   0                   0                   0

  Column 61

                   0


inner_code_BER =

  Columns 1 through 5

   0.085155667120949   0.081407055164332   0.077694174471144   0.074020929706927   0.070391314810034

  Columns 6 through 10

   0.066809437833591   0.063279557865719   0.059806133434610   0.056393879158999   0.053047823435821

  Columns 11 through 15

   0.049773354587201   0.046576236558964   0.043462569379817   0.040438666902034   0.037510828772315

  Columns 16 through 20

   0.034684998884867   0.031966329609640   0.029358704811556   0.026864303594123   0.024483297577252

  Columns 21 through 25

   0.022213761305949   0.020051846503218                   0                   0                   0

  Columns 26 through 30

                   0                   0                   0                   0                   0

  Columns 31 through 35

                   0                   0                   0                   0                   0

  Columns 36 through 40

                   0                   0                   0                   0                   0

  Columns 41 through 45

                   0                   0                   0                   0                   0

  Columns 46 through 50

                   0                   0                   0                   0                   0

  Columns 51 through 55

                   0                   0                   0                   0                   0

  Columns 56 through 60

                   0                   0                   0                   0                   0

  Column 61

                   0


outer_code_BER =

  Columns 1 through 5

   0.085155667120950   0.081407055164337   0.077694174471160   0.074020929706985   0.070391314810242

  Columns 6 through 10

   0.066809437834306   0.063279557868078   0.059806133442090   0.056393879181767   0.053047823502301

  Columns 11 through 15

   0.049773354773248   0.046576237057480   0.043462570657259   0.040438670028046   0.037510836065144

  Columns 16 through 20

   0.034685015072667   0.031966363712906   0.029358772777493   0.026864431085577   0.024483520626156

  Columns 21 through 25

   0.022214118313113   0.020052344722676                   0                   0                   0

  Columns 26 through 30

                   0                   0                   0                   0                   0

  Columns 31 through 35

                   0                   0                   0                   0                   0

  Columns 36 through 40

                   0                   0                   0                   0                   0

  Columns 41 through 45

                   0                   0                   0                   0                   0

  Columns 46 through 50

                   0                   0                   0                   0                   0

  Columns 51 through 55

                   0                   0                   0                   0                   0

  Columns 56 through 60

                   0                   0                   0                   0                   0

  Column 61

                   0


inner_code_BER =

  Columns 1 through 5

   0.085155667120949   0.081407055164332   0.077694174471144   0.074020929706927   0.070391314810034

  Columns 6 through 10

   0.066809437833591   0.063279557865719   0.059806133434610   0.056393879158999   0.053047823435821

  Columns 11 through 15

   0.049773354587201   0.046576236558964   0.043462569379817   0.040438666902034   0.037510828772315

  Columns 16 through 20

   0.034684998884867   0.031966329609640   0.029358704811556   0.026864303594123   0.024483297577252

  Columns 21 through 25

   0.022213761305949   0.020051846503218   0.017992248620851                   0                   0

  Columns 26 through 30

                   0                   0                   0                   0                   0

  Columns 31 through 35

                   0                   0                   0                   0                   0

  Columns 36 through 40

                   0                   0                   0                   0                   0

  Columns 41 through 45

                   0                   0                   0                   0                   0

  Columns 46 through 50

                   0                   0                   0                   0                   0

  Columns 51 through 55

                   0                   0                   0                   0                   0

  Columns 56 through 60

                   0                   0                   0                   0                   0

  Column 61

                   0


outer_code_BER =

  Columns 1 through 5

   0.085155667120950   0.081407055164337   0.077694174471160   0.074020929706985   0.070391314810242

  Columns 6 through 10

   0.066809437834306   0.063279557868078   0.059806133442090   0.056393879181767   0.053047823502301

  Columns 11 through 15

   0.049773354773248   0.046576237057480   0.043462570657259   0.040438670028046   0.037510836065144

  Columns 16 through 20

   0.034685015072667   0.031966363712906   0.029358772777493   0.026864431085577   0.024483520626156

  Columns 21 through 25

   0.022214118313113   0.020052344722676   0.017992763708284                   0                   0

  Columns 26 through 30

                   0                   0                   0                   0                   0

  Columns 31 through 35

                   0                   0                   0                   0                   0

  Columns 36 through 40

                   0                   0                   0                   0                   0

  Columns 41 through 45

                   0                   0                   0                   0                   0

  Columns 46 through 50

                   0                   0                   0                   0                   0

  Columns 51 through 55

                   0                   0                   0                   0                   0

  Columns 56 through 60

                   0                   0                   0                   0                   0

  Column 61

                   0


inner_code_BER =

  Columns 1 through 5

   0.085155667120949   0.081407055164332   0.077694174471144   0.074020929706927   0.070391314810034

  Columns 6 through 10

   0.066809437833591   0.063279557865719   0.059806133434610   0.056393879158999   0.053047823435821

  Columns 11 through 15

   0.049773354587201   0.046576236558964   0.043462569379817   0.040438666902034   0.037510828772315

  Columns 16 through 20

   0.034684998884867   0.031966329609640   0.029358704811556   0.026864303594123   0.024483297577252

  Columns 21 through 25

   0.022213761305949   0.020051846503218   0.017992248620851   0.016029006383264                   0

  Columns 26 through 30

                   0                   0                   0                   0                   0

  Columns 31 through 35

                   0                   0                   0                   0                   0

  Columns 36 through 40

                   0                   0                   0                   0                   0

  Columns 41 through 45

                   0                   0                   0                   0                   0

  Columns 46 through 50

                   0                   0                   0                   0                   0

  Columns 51 through 55

                   0                   0                   0                   0                   0

  Columns 56 through 60

                   0                   0                   0                   0                   0

  Column 61

                   0


outer_code_BER =

  Columns 1 through 5

   0.085155667120950   0.081407055164337   0.077694174471160   0.074020929706985   0.070391314810242

  Columns 6 through 10

   0.066809437834306   0.063279557868078   0.059806133442090   0.056393879181767   0.053047823502301

  Columns 11 through 15

   0.049773354773248   0.046576237057480   0.043462570657259   0.040438670028046   0.037510836065144

  Columns 16 through 20

   0.034685015072667   0.031966363712906   0.029358772777493   0.026864431085577   0.024483520626156

  Columns 21 through 25

   0.022214118313113   0.020052344722676   0.017992763708284   0.016029018697461                   0

  Columns 26 through 30

                   0                   0                   0                   0                   0

  Columns 31 through 35

                   0                   0                   0                   0                   0

  Columns 36 through 40

                   0                   0                   0                   0                   0

  Columns 41 through 45

                   0                   0                   0                   0                   0

  Columns 46 through 50

                   0                   0                   0                   0                   0

  Columns 51 through 55

                   0                   0                   0                   0                   0

  Columns 56 through 60

                   0                   0                   0                   0                   0

  Column 61

                   0


inner_code_BER =

  Columns 1 through 5

   0.085155667120949   0.081407055164332   0.077694174471144   0.074020929706927   0.070391314810034

  Columns 6 through 10

   0.066809437833591   0.063279557865719   0.059806133434610   0.056393879158999   0.053047823435821

  Columns 11 through 15

   0.049773354587201   0.046576236558964   0.043462569379817   0.040438666902034   0.037510828772315

  Columns 16 through 20

   0.034684998884867   0.031966329609640   0.029358704811556   0.026864303594123   0.024483297577252

  Columns 21 through 25

   0.022213761305949   0.020051846503218   0.017992248620851   0.016029006383264   0.014156744507010

  Columns 26 through 30

                   0                   0                   0                   0                   0

  Columns 31 through 35

                   0                   0                   0                   0                   0

  Columns 36 through 40

                   0                   0                   0                   0                   0

  Columns 41 through 45

                   0                   0                   0                   0                   0

  Columns 46 through 50

                   0                   0                   0                   0                   0

  Columns 51 through 55

                   0                   0                   0                   0                   0

  Columns 56 through 60

                   0                   0                   0                   0                   0

  Column 61

                   0


outer_code_BER =

  Columns 1 through 5

   0.085155667120950   0.081407055164337   0.077694174471160   0.074020929706985   0.070391314810242

  Columns 6 through 10

   0.066809437834306   0.063279557868078   0.059806133442090   0.056393879181767   0.053047823502301

  Columns 11 through 15

   0.049773354773248   0.046576237057480   0.043462570657259   0.040438670028046   0.037510836065144

  Columns 16 through 20

   0.034685015072667   0.031966363712906   0.029358772777493   0.026864431085577   0.024483520626156

  Columns 21 through 25

   0.022214118313113   0.020052344722676   0.017992763708284   0.016029018697461   0.014154704127954

  Columns 26 through 30

                   0                   0                   0                   0                   0

  Columns 31 through 35

                   0                   0                   0                   0                   0

  Columns 36 through 40

                   0                   0                   0                   0                   0

  Columns 41 through 45

                   0                   0                   0                   0                   0

  Columns 46 through 50

                   0                   0                   0                   0                   0

  Columns 51 through 55

                   0                   0                   0                   0                   0

  Columns 56 through 60

                   0                   0                   0                   0                   0

  Column 61

                   0


inner_code_BER =

  Columns 1 through 5

   0.085155667120949   0.081407055164332   0.077694174471144   0.074020929706927   0.070391314810034

  Columns 6 through 10

   0.066809437833591   0.063279557865719   0.059806133434610   0.056393879158999   0.053047823435821

  Columns 11 through 15

   0.049773354587201   0.046576236558964   0.043462569379817   0.040438666902034   0.037510828772315

  Columns 16 through 20

   0.034684998884867   0.031966329609640   0.029358704811556   0.026864303594123   0.024483297577252

  Columns 21 through 25

   0.022213761305949   0.020051846503218   0.017992248620851   0.016029006383264   0.014156744507010

  Columns 26 through 30

   0.012372596360139                   0                   0                   0                   0

  Columns 31 through 35

                   0                   0                   0                   0                   0

  Columns 36 through 40

                   0                   0                   0                   0                   0

  Columns 41 through 45

                   0                   0                   0                   0                   0

  Columns 46 through 50

                   0                   0                   0                   0                   0

  Columns 51 through 55

                   0                   0                   0                   0                   0

  Columns 56 through 60

                   0                   0                   0                   0                   0

  Column 61

                   0


outer_code_BER =

  Columns 1 through 5

   0.085155667120950   0.081407055164337   0.077694174471160   0.074020929706985   0.070391314810242

  Columns 6 through 10

   0.066809437834306   0.063279557868078   0.059806133442090   0.056393879181767   0.053047823502301

  Columns 11 through 15

   0.049773354773248   0.046576237057480   0.043462570657259   0.040438670028046   0.037510836065144

  Columns 16 through 20

   0.034685015072667   0.031966363712906   0.029358772777493   0.026864431085577   0.024483520626156

  Columns 21 through 25

   0.022214118313113   0.020052344722676   0.017992763708284   0.016029018697461   0.014154704127954

  Columns 26 through 30

   0.012364511162964                   0                   0                   0                   0

  Columns 31 through 35

                   0                   0                   0                   0                   0

  Columns 36 through 40

                   0                   0                   0                   0                   0

  Columns 41 through 45

                   0                   0                   0                   0                   0

  Columns 46 through 50

                   0                   0                   0                   0                   0

  Columns 51 through 55

                   0                   0                   0                   0                   0

  Columns 56 through 60

                   0                   0                   0                   0                   0

  Column 61

                   0


inner_code_BER =

  Columns 1 through 5

   0.085155667120949   0.081407055164332   0.077694174471144   0.074020929706927   0.070391314810034

  Columns 6 through 10

   0.066809437833591   0.063279557865719   0.059806133434610   0.056393879158999   0.053047823435821

  Columns 11 through 15

   0.049773354587201   0.046576236558964   0.043462569379817   0.040438666902034   0.037510828772315

  Columns 16 through 20

   0.034684998884867   0.031966329609640   0.029358704811556   0.026864303594123   0.024483297577252

  Columns 21 through 25

   0.022213761305949   0.020051846503218   0.017992248620851   0.016029006383264   0.014156744507010

  Columns 26 through 30

   0.012372596360139   0.010679136461888                   0                   0                   0

  Columns 31 through 35

                   0                   0                   0                   0                   0

  Columns 36 through 40

                   0                   0                   0                   0                   0

  Columns 41 through 45

                   0                   0                   0                   0                   0

  Columns 46 through 50

                   0                   0                   0                   0                   0

  Columns 51 through 55

                   0                   0                   0                   0                   0

  Columns 56 through 60

                   0                   0                   0                   0                   0

  Column 61

                   0


outer_code_BER =

  Columns 1 through 5

   0.085155667120950   0.081407055164337   0.077694174471160   0.074020929706985   0.070391314810242

  Columns 6 through 10

   0.066809437834306   0.063279557868078   0.059806133442090   0.056393879181767   0.053047823502301

  Columns 11 through 15

   0.049773354773248   0.046576237057480   0.043462570657259   0.040438670028046   0.037510836065144

  Columns 16 through 20

   0.034685015072667   0.031966363712906   0.029358772777493   0.026864431085577   0.024483520626156

  Columns 21 through 25

   0.022214118313113   0.020052344722676   0.017992763708284   0.016029018697461   0.014154704127954

  Columns 26 through 30

   0.012364511162964   0.010655706589208                   0                   0                   0

  Columns 31 through 35

                   0                   0                   0                   0                   0

  Columns 36 through 40

                   0                   0                   0                   0                   0

  Columns 41 through 45

                   0                   0                   0                   0                   0

  Columns 46 through 50

                   0                   0                   0                   0                   0

  Columns 51 through 55

                   0                   0                   0                   0                   0

  Columns 56 through 60

                   0                   0                   0                   0                   0

  Column 61

                   0


inner_code_BER =

  Columns 1 through 5

   0.085155667120949   0.081407055164332   0.077694174471144   0.074020929706927   0.070391314810034

  Columns 6 through 10

   0.066809437833591   0.063279557865719   0.059806133434610   0.056393879158999   0.053047823435821

  Columns 11 through 15

   0.049773354587201   0.046576236558964   0.043462569379817   0.040438666902034   0.037510828772315

  Columns 16 through 20

   0.034684998884867   0.031966329609640   0.029358704811556   0.026864303594123   0.024483297577252

  Columns 21 through 25

   0.022213761305949   0.020051846503218   0.017992248620851   0.016029006383264   0.014156744507010

  Columns 26 through 30

   0.012372596360139   0.010679136461888   0.009088314671588                   0                   0

  Columns 31 through 35

                   0                   0                   0                   0                   0

  Columns 36 through 40

                   0                   0                   0                   0                   0

  Columns 41 through 45

                   0                   0                   0                   0                   0

  Columns 46 through 50

                   0                   0                   0                   0                   0

  Columns 51 through 55

                   0                   0                   0                   0                   0

  Columns 56 through 60

                   0                   0                   0                   0                   0

  Column 61

                   0


outer_code_BER =

  Columns 1 through 5

   0.085155667120950   0.081407055164337   0.077694174471160   0.074020929706985   0.070391314810242

  Columns 6 through 10

   0.066809437834306   0.063279557868078   0.059806133442090   0.056393879181767   0.053047823502301

  Columns 11 through 15

   0.049773354773248   0.046576237057480   0.043462570657259   0.040438670028046   0.037510836065144

  Columns 16 through 20

   0.034685015072667   0.031966363712906   0.029358772777493   0.026864431085577   0.024483520626156

  Columns 21 through 25

   0.022214118313113   0.020052344722676   0.017992763708284   0.016029018697461   0.014154704127954

  Columns 26 through 30

   0.012364511162964   0.010655706589208   0.009029768756297                   0                   0

  Columns 31 through 35

                   0                   0                   0                   0                   0

  Columns 36 through 40

                   0                   0                   0                   0                   0

  Columns 41 through 45

                   0                   0                   0                   0                   0

  Columns 46 through 50

                   0                   0                   0                   0                   0

  Columns 51 through 55

                   0                   0                   0                   0                   0

  Columns 56 through 60

                   0                   0                   0                   0                   0

  Column 61

                   0


inner_code_BER =

  Columns 1 through 5

   0.085155667120949   0.081407055164332   0.077694174471144   0.074020929706927   0.070391314810034

  Columns 6 through 10

   0.066809437833591   0.063279557865719   0.059806133434610   0.056393879158999   0.053047823435821

  Columns 11 through 15

   0.049773354587201   0.046576236558964   0.043462569379817   0.040438666902034   0.037510828772315

  Columns 16 through 20

   0.034684998884867   0.031966329609640   0.029358704811556   0.026864303594123   0.024483297577252

  Columns 21 through 25

   0.022213761305949   0.020051846503218   0.017992248620851   0.016029006383264   0.014156744507010

  Columns 26 through 30

   0.012372596360139   0.010679136461888   0.009088314671588   0.007624631971604                   0

  Columns 31 through 35

                   0                   0                   0                   0                   0

  Columns 36 through 40

                   0                   0                   0                   0                   0

  Columns 41 through 45

                   0                   0                   0                   0                   0

  Columns 46 through 50

                   0                   0                   0                   0                   0

  Columns 51 through 55

                   0                   0                   0                   0                   0

  Columns 56 through 60

                   0                   0                   0                   0                   0

  Column 61

                   0


outer_code_BER =

  Columns 1 through 5

   0.085155667120950   0.081407055164337   0.077694174471160   0.074020929706985   0.070391314810242

  Columns 6 through 10

   0.066809437834306   0.063279557868078   0.059806133442090   0.056393879181767   0.053047823502301

  Columns 11 through 15

   0.049773354773248   0.046576237057480   0.043462570657259   0.040438670028046   0.037510836065144

  Columns 16 through 20

   0.034685015072667   0.031966363712906   0.029358772777493   0.026864431085577   0.024483520626156

  Columns 21 through 25

   0.022214118313113   0.020052344722676   0.017992763708284   0.016029018697461   0.014154704127954

  Columns 26 through 30

   0.012364511162964   0.010655706589208   0.009029768756297   0.007492794939469                   0

  Columns 31 through 35

                   0                   0                   0                   0                   0

  Columns 36 through 40

                   0                   0                   0                   0                   0

  Columns 41 through 45

                   0                   0                   0                   0                   0

  Columns 46 through 50

                   0                   0                   0                   0                   0

  Columns 51 through 55

                   0                   0                   0                   0                   0

  Columns 56 through 60

                   0                   0                   0                   0                   0

  Column 61

                   0


inner_code_BER =

  Columns 1 through 5

   0.085155667120949   0.081407055164332   0.077694174471144   0.074020929706927   0.070391314810034

  Columns 6 through 10

   0.066809437833591   0.063279557865719   0.059806133434610   0.056393879158999   0.053047823435821

  Columns 11 through 15

   0.049773354587201   0.046576236558964   0.043462569379817   0.040438666902034   0.037510828772315

  Columns 16 through 20

   0.034684998884867   0.031966329609640   0.029358704811556   0.026864303594123   0.024483297577252

  Columns 21 through 25

   0.022213761305949   0.020051846503218   0.017992248620851   0.016029006383264   0.014156744507010

  Columns 26 through 30

   0.012372596360139   0.010679136461888   0.009088314671588   0.007624631971604   0.006322279828543

  Columns 31 through 35

                   0                   0                   0                   0                   0

  Columns 36 through 40

                   0                   0                   0                   0                   0

  Columns 41 through 45

                   0                   0                   0                   0                   0

  Columns 46 through 50

                   0                   0                   0                   0                   0

  Columns 51 through 55

                   0                   0                   0                   0                   0

  Columns 56 through 60

                   0                   0                   0                   0                   0

  Column 61

                   0


outer_code_BER =

  Columns 1 through 5

   0.085155667120950   0.081407055164337   0.077694174471160   0.074020929706985   0.070391314810242

  Columns 6 through 10

   0.066809437834306   0.063279557868078   0.059806133442090   0.056393879181767   0.053047823502301

  Columns 11 through 15

   0.049773354773248   0.046576237057480   0.043462570657259   0.040438670028046   0.037510836065144

  Columns 16 through 20

   0.034685015072667   0.031966363712906   0.029358772777493   0.026864431085577   0.024483520626156

  Columns 21 through 25

   0.022214118313113   0.020052344722676   0.017992763708284   0.016029018697461   0.014154704127954

  Columns 26 through 30

   0.012364511162964   0.010655706589208   0.009029768756297   0.007492794939469   0.006050102777845

  Columns 31 through 35

                   0                   0                   0                   0                   0

  Columns 36 through 40

                   0                   0                   0                   0                   0

  Columns 41 through 45

                   0                   0                   0                   0                   0

  Columns 46 through 50

                   0                   0                   0                   0                   0

  Columns 51 through 55

                   0                   0                   0                   0                   0

  Columns 56 through 60

                   0                   0                   0                   0                   0

  Column 61

                   0


inner_code_BER =

  Columns 1 through 5

   0.085155667120949   0.081407055164332   0.077694174471144   0.074020929706927   0.070391314810034

  Columns 6 through 10

   0.066809437833591   0.063279557865719   0.059806133434610   0.056393879158999   0.053047823435821

  Columns 11 through 15

   0.049773354587201   0.046576236558964   0.043462569379817   0.040438666902034   0.037510828772315

  Columns 16 through 20

   0.034684998884867   0.031966329609640   0.029358704811556   0.026864303594123   0.024483297577252

  Columns 21 through 25

   0.022213761305949   0.020051846503218   0.017992248620851   0.016029006383264   0.014156744507010

  Columns 26 through 30

   0.012372596360139   0.010679136461888   0.009088314671588   0.007624631971604   0.006322279828543

  Columns 31 through 35

   0.005211171326380                   0                   0                   0                   0

  Columns 36 through 40

                   0                   0                   0                   0                   0

  Columns 41 through 45

                   0                   0                   0                   0                   0

  Columns 46 through 50

                   0                   0                   0                   0                   0

  Columns 51 through 55

                   0                   0                   0                   0                   0

  Columns 56 through 60

                   0                   0                   0                   0                   0

  Column 61

                   0


outer_code_BER =

  Columns 1 through 5

   0.085155667120950   0.081407055164337   0.077694174471160   0.074020929706985   0.070391314810242

  Columns 6 through 10

   0.066809437834306   0.063279557868078   0.059806133442090   0.056393879181767   0.053047823502301

  Columns 11 through 15

   0.049773354773248   0.046576237057480   0.043462570657259   0.040438670028046   0.037510836065144

  Columns 16 through 20

   0.034685015072667   0.031966363712906   0.029358772777493   0.026864431085577   0.024483520626156

  Columns 21 through 25

   0.022214118313113   0.020052344722676   0.017992763708284   0.016029018697461   0.014154704127954

  Columns 26 through 30

   0.012364511162964   0.010655706589208   0.009029768756297   0.007492794939469   0.006050102777845

  Columns 31 through 35

   0.004684917751728                   0                   0                   0                   0

  Columns 36 through 40

                   0                   0                   0                   0                   0

  Columns 41 through 45

                   0                   0                   0                   0                   0

  Columns 46 through 50

                   0                   0                   0                   0                   0

  Columns 51 through 55

                   0                   0                   0                   0                   0

  Columns 56 through 60

                   0                   0                   0                   0                   0

  Column 61

                   0


inner_code_BER =

  Columns 1 through 5

   0.085155667120949   0.081407055164332   0.077694174471144   0.074020929706927   0.070391314810034

  Columns 6 through 10

   0.066809437833591   0.063279557865719   0.059806133434610   0.056393879158999   0.053047823435821

  Columns 11 through 15

   0.049773354587201   0.046576236558964   0.043462569379817   0.040438666902034   0.037510828772315

  Columns 16 through 20

   0.034684998884867   0.031966329609640   0.029358704811556   0.026864303594123   0.024483297577252

  Columns 21 through 25

   0.022213761305949   0.020051846503218   0.017992248620851   0.016029006383264   0.014156744507010

  Columns 26 through 30

   0.012372596360139   0.010679136461888   0.009088314671588   0.007624631971604   0.006322279828543

  Columns 31 through 35

   0.005211171326380   0.004299371268813                   0                   0                   0

  Columns 36 through 40

                   0                   0                   0                   0                   0

  Columns 41 through 45

                   0                   0                   0                   0                   0

  Columns 46 through 50

                   0                   0                   0                   0                   0

  Columns 51 through 55

                   0                   0                   0                   0                   0

  Columns 56 through 60

                   0                   0                   0                   0                   0

  Column 61

                   0


outer_code_BER =

  Columns 1 through 5

   0.085155667120950   0.081407055164337   0.077694174471160   0.074020929706985   0.070391314810242

  Columns 6 through 10

   0.066809437834306   0.063279557868078   0.059806133442090   0.056393879181767   0.053047823502301

  Columns 11 through 15

   0.049773354773248   0.046576237057480   0.043462570657259   0.040438670028046   0.037510836065144

  Columns 16 through 20

   0.034685015072667   0.031966363712906   0.029358772777493   0.026864431085577   0.024483520626156

  Columns 21 through 25

   0.022214118313113   0.020052344722676   0.017992763708284   0.016029018697461   0.014154704127954

  Columns 26 through 30

   0.012364511162964   0.010655706589208   0.009029768756297   0.007492794939469   0.006050102777845

  Columns 31 through 35

   0.004684917751728   0.003266985885820                   0                   0                   0

  Columns 36 through 40

                   0                   0                   0                   0                   0

  Columns 41 through 45

                   0                   0                   0                   0                   0

  Columns 46 through 50

                   0                   0                   0                   0                   0

  Columns 51 through 55

                   0                   0                   0                   0                   0

  Columns 56 through 60

                   0                   0                   0                   0                   0

  Column 61

                   0


inner_code_BER =

  Columns 1 through 5

   0.085155667120949   0.081407055164332   0.077694174471144   0.074020929706927   0.070391314810034

  Columns 6 through 10

   0.066809437833591   0.063279557865719   0.059806133434610   0.056393879158999   0.053047823435821

  Columns 11 through 15

   0.049773354587201   0.046576236558964   0.043462569379817   0.040438666902034   0.037510828772315

  Columns 16 through 20

   0.034684998884867   0.031966329609640   0.029358704811556   0.026864303594123   0.024483297577252

  Columns 21 through 25

   0.022213761305949   0.020051846503218   0.017992248620851   0.016029006383264   0.014156744507010

  Columns 26 through 30

   0.012372596360139   0.010679136461888   0.009088314671588   0.007624631971604   0.006322279828543

  Columns 31 through 35

   0.005211171326380   0.004299371268813   0.003569308452591                   0                   0

  Columns 36 through 40

                   0                   0                   0                   0                   0

  Columns 41 through 45

                   0                   0                   0                   0                   0

  Columns 46 through 50

                   0                   0                   0                   0                   0

  Columns 51 through 55

                   0                   0                   0                   0                   0

  Columns 56 through 60

                   0                   0                   0                   0                   0

  Column 61

                   0


outer_code_BER =

  Columns 1 through 5

   0.085155667120950   0.081407055164337   0.077694174471160   0.074020929706985   0.070391314810242

  Columns 6 through 10

   0.066809437834306   0.063279557868078   0.059806133442090   0.056393879181767   0.053047823502301

  Columns 11 through 15

   0.049773354773248   0.046576237057480   0.043462570657259   0.040438670028046   0.037510836065144

  Columns 16 through 20

   0.034685015072667   0.031966363712906   0.029358772777493   0.026864431085577   0.024483520626156

  Columns 21 through 25

   0.022214118313113   0.020052344722676   0.017992763708284   0.016029018697461   0.014154704127954

  Columns 26 through 30

   0.012364511162964   0.010655706589208   0.009029768756297   0.007492794939469   0.006050102777845

  Columns 31 through 35

   0.004684917751728   0.003266985885820   0.000000364222982                   0                   0

  Columns 36 through 40

                   0                   0                   0                   0                   0

  Columns 41 through 45

                   0                   0                   0                   0                   0

  Columns 46 through 50

                   0                   0                   0                   0                   0

  Columns 51 through 55

                   0                   0                   0                   0                   0

  Columns 56 through 60

                   0                   0                   0                   0                   0

  Column 61

                   0

µ±Ç°ÍâÂëÎóÂëÂÊÒÑµÍÓÚÄ¿±êÎóÂëÂÊ£¬ÐÅÔë±ÈÎª3.20 dB

inner_code_BER =

  Columns 1 through 5

   0.085155667120949   0.081407055164332   0.077694174471144   0.074020929706927   0.070391314810034

  Columns 6 through 10

   0.066809437833591   0.063279557865719   0.059806133434610   0.056393879158999   0.053047823435821

  Columns 11 through 15

   0.049773354587201   0.046576236558964   0.043462569379817   0.040438666902034   0.037510828772315

  Columns 16 through 20

   0.034684998884867   0.031966329609640   0.029358704811556   0.026864303594123   0.024483297577252

  Columns 21 through 25

   0.022213761305949   0.020051846503218   0.017992248620851   0.016029006383264   0.014156744507010

  Columns 26 through 30

   0.012372596360139   0.010679136461888   0.009088314671588   0.007624631971604   0.006322279828543

  Columns 31 through 35

   0.005211171326380   0.004299371268813   0.003569308452591   0.002989377477988                   0

  Columns 36 through 40

                   0                   0                   0                   0                   0

  Columns 41 through 45

                   0                   0                   0                   0                   0

  Columns 46 through 50

                   0                   0                   0                   0                   0

  Columns 51 through 55

                   0                   0                   0                   0                   0

  Columns 56 through 60

                   0                   0                   0                   0                   0

  Column 61

                   0


inner_code_BER =

  Columns 1 through 5

   0.085155667120949   0.081407055164332   0.077694174471144   0.074020929706927   0.070391314810034

  Columns 6 through 10

   0.066809437833591   0.063279557865719   0.059806133434610   0.056393879158999   0.053047823435821

  Columns 11 through 15

   0.049773354587201   0.046576236558964   0.043462569379817   0.040438666902034   0.037510828772315

  Columns 16 through 20

   0.034684998884867   0.031966329609640   0.029358704811556   0.026864303594123   0.024483297577252

  Columns 21 through 25

   0.022213761305949   0.020051846503218   0.017992248620851   0.016029006383264   0.014156744507010

  Columns 26 through 30

   0.012372596360139   0.010679136461888   0.009088314671588   0.007624631971604   0.006322279828543

  Columns 31 through 35

   0.005211171326380   0.004299371268813   0.003569308452591   0.002989377477988   0.002526839565515

  Columns 36 through 40

                   0                   0                   0                   0                   0

  Columns 41 through 45

                   0                   0                   0                   0                   0

  Columns 46 through 50

                   0                   0                   0                   0                   0

  Columns 51 through 55

                   0                   0                   0                   0                   0

  Columns 56 through 60

                   0                   0                   0                   0                   0

  Column 61

                   0


inner_code_BER =

  Columns 1 through 5

   0.085155667120949   0.081407055164332   0.077694174471144   0.074020929706927   0.070391314810034

  Columns 6 through 10

   0.066809437833591   0.063279557865719   0.059806133434610   0.056393879158999   0.053047823435821

  Columns 11 through 15

   0.049773354587201   0.046576236558964   0.043462569379817   0.040438666902034   0.037510828772315

  Columns 16 through 20

   0.034684998884867   0.031966329609640   0.029358704811556   0.026864303594123   0.024483297577252

  Columns 21 through 25

   0.022213761305949   0.020051846503218   0.017992248620851   0.016029006383264   0.014156744507010

  Columns 26 through 30

   0.012372596360139   0.010679136461888   0.009088314671588   0.007624631971604   0.006322279828543

  Columns 31 through 35

   0.005211171326380   0.004299371268813   0.003569308452591   0.002989377477988   0.002526839565515

  Columns 36 through 40

   0.002154163317560                   0                   0                   0                   0

  Columns 41 through 45

                   0                   0                   0                   0                   0

  Columns 46 through 50

                   0                   0                   0                   0                   0

  Columns 51 through 55

                   0                   0                   0                   0                   0

  Columns 56 through 60

                   0                   0                   0                   0                   0

  Column 61

                   0


inner_code_BER =

  Columns 1 through 5

   0.085155667120949   0.081407055164332   0.077694174471144   0.074020929706927   0.070391314810034

  Columns 6 through 10

   0.066809437833591   0.063279557865719   0.059806133434610   0.056393879158999   0.053047823435821

  Columns 11 through 15

   0.049773354587201   0.046576236558964   0.043462569379817   0.040438666902034   0.037510828772315

  Columns 16 through 20

   0.034684998884867   0.031966329609640   0.029358704811556   0.026864303594123   0.024483297577252

  Columns 21 through 25

   0.022213761305949   0.020051846503218   0.017992248620851   0.016029006383264   0.014156744507010

  Columns 26 through 30

   0.012372596360139   0.010679136461888   0.009088314671588   0.007624631971604   0.006322279828543

  Columns 31 through 35

   0.005211171326380   0.004299371268813   0.003569308452591   0.002989377477988   0.002526839565515

  Columns 36 through 40

   0.002154163317560   0.001850191246125                   0                   0                   0

  Columns 41 through 45

                   0                   0                   0                   0                   0

  Columns 46 through 50

                   0                   0                   0                   0                   0

  Columns 51 through 55

                   0                   0                   0                   0                   0

  Columns 56 through 60

                   0                   0                   0                   0                   0

  Column 61

                   0


inner_code_BER =

  Columns 1 through 5

   0.085155667120949   0.081407055164332   0.077694174471144   0.074020929706927   0.070391314810034

  Columns 6 through 10

   0.066809437833591   0.063279557865719   0.059806133434610   0.056393879158999   0.053047823435821

  Columns 11 through 15

   0.049773354587201   0.046576236558964   0.043462569379817   0.040438666902034   0.037510828772315

  Columns 16 through 20

   0.034684998884867   0.031966329609640   0.029358704811556   0.026864303594123   0.024483297577252

  Columns 21 through 25

   0.022213761305949   0.020051846503218   0.017992248620851   0.016029006383264   0.014156744507010

  Columns 26 through 30

   0.012372596360139   0.010679136461888   0.009088314671588   0.007624631971604   0.006322279828543

  Columns 31 through 35

   0.005211171326380   0.004299371268813   0.003569308452591   0.002989377477988   0.002526839565515

  Columns 36 through 40

   0.002154163317560   0.001850191246125   0.001599214658173                   0                   0

  Columns 41 through 45

                   0                   0                   0                   0                   0

  Columns 46 through 50

                   0                   0                   0                   0                   0

  Columns 51 through 55

                   0                   0                   0                   0                   0

  Columns 56 through 60

                   0                   0                   0                   0                   0

  Column 61

                   0


inner_code_BER =

  Columns 1 through 5

   0.085155667120949   0.081407055164332   0.077694174471144   0.074020929706927   0.070391314810034

  Columns 6 through 10

   0.066809437833591   0.063279557865719   0.059806133434610   0.056393879158999   0.053047823435821

  Columns 11 through 15

   0.049773354587201   0.046576236558964   0.043462569379817   0.040438666902034   0.037510828772315

  Columns 16 through 20

   0.034684998884867   0.031966329609640   0.029358704811556   0.026864303594123   0.024483297577252

  Columns 21 through 25

   0.022213761305949   0.020051846503218   0.017992248620851   0.016029006383264   0.014156744507010

  Columns 26 through 30

   0.012372596360139   0.010679136461888   0.009088314671588   0.007624631971604   0.006322279828543

  Columns 31 through 35

   0.005211171326380   0.004299371268813   0.003569308452591   0.002989377477988   0.002526839565515

  Columns 36 through 40

   0.002154163317560   0.001850191246125   0.001599214658173   0.001389653988286                   0

  Columns 41 through 45

                   0                   0                   0                   0                   0

  Columns 46 through 50

                   0                   0                   0                   0                   0

  Columns 51 through 55

                   0                   0                   0                   0                   0

  Columns 56 through 60

                   0                   0                   0                   0                   0

  Column 61

                   0


inner_code_BER =

  Columns 1 through 5

   0.085155667120949   0.081407055164332   0.077694174471144   0.074020929706927   0.070391314810034

  Columns 6 through 10

   0.066809437833591   0.063279557865719   0.059806133434610   0.056393879158999   0.053047823435821

  Columns 11 through 15

   0.049773354587201   0.046576236558964   0.043462569379817   0.040438666902034   0.037510828772315

  Columns 16 through 20

   0.034684998884867   0.031966329609640   0.029358704811556   0.026864303594123   0.024483297577252

  Columns 21 through 25

   0.022213761305949   0.020051846503218   0.017992248620851   0.016029006383264   0.014156744507010

  Columns 26 through 30

   0.012372596360139   0.010679136461888   0.009088314671588   0.007624631971604   0.006322279828543

  Columns 31 through 35

   0.005211171326380   0.004299371268813   0.003569308452591   0.002989377477988   0.002526839565515

  Columns 36 through 40

   0.002154163317560   0.001850191246125   0.001599214658173   0.001389653988286   0.001212923032396

  Columns 41 through 45

                   0                   0                   0                   0                   0

  Columns 46 through 50

                   0                   0                   0                   0                   0

  Columns 51 through 55

                   0                   0                   0                   0                   0

  Columns 56 through 60

                   0                   0                   0                   0                   0

  Column 61

                   0


inner_code_BER =

  Columns 1 through 5

   0.085155667120949   0.081407055164332   0.077694174471144   0.074020929706927   0.070391314810034

  Columns 6 through 10

   0.066809437833591   0.063279557865719   0.059806133434610   0.056393879158999   0.053047823435821

  Columns 11 through 15

   0.049773354587201   0.046576236558964   0.043462569379817   0.040438666902034   0.037510828772315

  Columns 16 through 20

   0.034684998884867   0.031966329609640   0.029358704811556   0.026864303594123   0.024483297577252

  Columns 21 through 25

   0.022213761305949   0.020051846503218   0.017992248620851   0.016029006383264   0.014156744507010

  Columns 26 through 30

   0.012372596360139   0.010679136461888   0.009088314671588   0.007624631971604   0.006322279828543

  Columns 31 through 35

   0.005211171326380   0.004299371268813   0.003569308452591   0.002989377477988   0.002526839565515

  Columns 36 through 40

   0.002154163317560   0.001850191246125   0.001599214658173   0.001389653988286   0.001212923032396

  Columns 41 through 45

   0.001062579607516                   0                   0                   0                   0

  Columns 46 through 50

                   0                   0                   0                   0                   0

  Columns 51 through 55

                   0                   0                   0                   0                   0

  Columns 56 through 60

                   0                   0                   0                   0                   0

  Column 61

                   0


inner_code_BER =

  Columns 1 through 5

   0.085155667120949   0.081407055164332   0.077694174471144   0.074020929706927   0.070391314810034

  Columns 6 through 10

   0.066809437833591   0.063279557865719   0.059806133434610   0.056393879158999   0.053047823435821

  Columns 11 through 15

   0.049773354587201   0.046576236558964   0.043462569379817   0.040438666902034   0.037510828772315

  Columns 16 through 20

   0.034684998884867   0.031966329609640   0.029358704811556   0.026864303594123   0.024483297577252

  Columns 21 through 25

   0.022213761305949   0.020051846503218   0.017992248620851   0.016029006383264   0.014156744507010

  Columns 26 through 30

   0.012372596360139   0.010679136461888   0.009088314671588   0.007624631971604   0.006322279828543

  Columns 31 through 35

   0.005211171326380   0.004299371268813   0.003569308452591   0.002989377477988   0.002526839565515

  Columns 36 through 40

   0.002154163317560   0.001850191246125   0.001599214658173   0.001389653988286   0.001212923032396

  Columns 41 through 45

   0.001062579607516   0.000933721632073                   0                   0                   0

  Columns 46 through 50

                   0                   0                   0                   0                   0

  Columns 51 through 55

                   0                   0                   0                   0                   0

  Columns 56 through 60

                   0                   0                   0                   0                   0

  Column 61

                   0


inner_code_BER =

  Columns 1 through 5

   0.085155667120949   0.081407055164332   0.077694174471144   0.074020929706927   0.070391314810034

  Columns 6 through 10

   0.066809437833591   0.063279557865719   0.059806133434610   0.056393879158999   0.053047823435821

  Columns 11 through 15

   0.049773354587201   0.046576236558964   0.043462569379817   0.040438666902034   0.037510828772315

  Columns 16 through 20

   0.034684998884867   0.031966329609640   0.029358704811556   0.026864303594123   0.024483297577252

  Columns 21 through 25

   0.022213761305949   0.020051846503218   0.017992248620851   0.016029006383264   0.014156744507010

  Columns 26 through 30

   0.012372596360139   0.010679136461888   0.009088314671588   0.007624631971604   0.006322279828543

  Columns 31 through 35

   0.005211171326380   0.004299371268813   0.003569308452591   0.002989377477988   0.002526839565515

  Columns 36 through 40

   0.002154163317560   0.001850191246125   0.001599214658173   0.001389653988286   0.001212923032396

  Columns 41 through 45

   0.001062579607516   0.000933721632073   0.000822564255585                   0                   0

  Columns 46 through 50

                   0                   0                   0                   0                   0

  Columns 51 through 55

                   0                   0                   0                   0                   0

  Columns 56 through 60

                   0                   0                   0                   0                   0

  Column 61

                   0


inner_code_BER =

  Columns 1 through 5

   0.085155667120949   0.081407055164332   0.077694174471144   0.074020929706927   0.070391314810034

  Columns 6 through 10

   0.066809437833591   0.063279557865719   0.059806133434610   0.056393879158999   0.053047823435821

  Columns 11 through 15

   0.049773354587201   0.046576236558964   0.043462569379817   0.040438666902034   0.037510828772315

  Columns 16 through 20

   0.034684998884867   0.031966329609640   0.029358704811556   0.026864303594123   0.024483297577252

  Columns 21 through 25

   0.022213761305949   0.020051846503218   0.017992248620851   0.016029006383264   0.014156744507010

  Columns 26 through 30

   0.012372596360139   0.010679136461888   0.009088314671588   0.007624631971604   0.006322279828543

  Columns 31 through 35

   0.005211171326380   0.004299371268813   0.003569308452591   0.002989377477988   0.002526839565515

  Columns 36 through 40

   0.002154163317560   0.001850191246125   0.001599214658173   0.001389653988286   0.001212923032396

  Columns 41 through 45

   0.001062579607516   0.000933721632073   0.000822564255585   0.000726143612900                   0

  Columns 46 through 50

                   0                   0                   0                   0                   0

  Columns 51 through 55

                   0                   0                   0                   0                   0

  Columns 56 through 60

                   0                   0                   0                   0                   0

  Column 61

                   0


inner_code_BER =

  Columns 1 through 5

   0.085155667120949   0.081407055164332   0.077694174471144   0.074020929706927   0.070391314810034

  Columns 6 through 10

   0.066809437833591   0.063279557865719   0.059806133434610   0.056393879158999   0.053047823435821

  Columns 11 through 15

   0.049773354587201   0.046576236558964   0.043462569379817   0.040438666902034   0.037510828772315

  Columns 16 through 20

   0.034684998884867   0.031966329609640   0.029358704811556   0.026864303594123   0.024483297577252

  Columns 21 through 25

   0.022213761305949   0.020051846503218   0.017992248620851   0.016029006383264   0.014156744507010

  Columns 26 through 30

   0.012372596360139   0.010679136461888   0.009088314671588   0.007624631971604   0.006322279828543

  Columns 31 through 35

   0.005211171326380   0.004299371268813   0.003569308452591   0.002989377477988   0.002526839565515

  Columns 36 through 40

   0.002154163317560   0.001850191246125   0.001599214658173   0.001389653988286   0.001212923032396

  Columns 41 through 45

   0.001062579607516   0.000933721632073   0.000822564255585   0.000726143612900   0.000642107611371

  Columns 46 through 50

                   0                   0                   0                   0                   0

  Columns 51 through 55

                   0                   0                   0                   0                   0

  Columns 56 through 60

                   0                   0                   0                   0                   0

  Column 61

                   0


inner_code_BER =

  Columns 1 through 5

   0.085155667120949   0.081407055164332   0.077694174471144   0.074020929706927   0.070391314810034

  Columns 6 through 10

   0.066809437833591   0.063279557865719   0.059806133434610   0.056393879158999   0.053047823435821

  Columns 11 through 15

   0.049773354587201   0.046576236558964   0.043462569379817   0.040438666902034   0.037510828772315

  Columns 16 through 20

   0.034684998884867   0.031966329609640   0.029358704811556   0.026864303594123   0.024483297577252

  Columns 21 through 25

   0.022213761305949   0.020051846503218   0.017992248620851   0.016029006383264   0.014156744507010

  Columns 26 through 30

   0.012372596360139   0.010679136461888   0.009088314671588   0.007624631971604   0.006322279828543

  Columns 31 through 35

   0.005211171326380   0.004299371268813   0.003569308452591   0.002989377477988   0.002526839565515

  Columns 36 through 40

   0.002154163317560   0.001850191246125   0.001599214658173   0.001389653988286   0.001212923032396

  Columns 41 through 45

   0.001062579607516   0.000933721632073   0.000822564255585   0.000726143612900   0.000642107611371

  Columns 46 through 50

   0.000568566463548                   0                   0                   0                   0

  Columns 51 through 55

                   0                   0                   0                   0                   0

  Columns 56 through 60

                   0                   0                   0                   0                   0

  Column 61

                   0


inner_code_BER =

  Columns 1 through 5

   0.085155667120949   0.081407055164332   0.077694174471144   0.074020929706927   0.070391314810034

  Columns 6 through 10

   0.066809437833591   0.063279557865719   0.059806133434610   0.056393879158999   0.053047823435821

  Columns 11 through 15

   0.049773354587201   0.046576236558964   0.043462569379817   0.040438666902034   0.037510828772315

  Columns 16 through 20

   0.034684998884867   0.031966329609640   0.029358704811556   0.026864303594123   0.024483297577252

  Columns 21 through 25

   0.022213761305949   0.020051846503218   0.017992248620851   0.016029006383264   0.014156744507010

  Columns 26 through 30

   0.012372596360139   0.010679136461888   0.009088314671588   0.007624631971604   0.006322279828543

  Columns 31 through 35

   0.005211171326380   0.004299371268813   0.003569308452591   0.002989377477988   0.002526839565515

  Columns 36 through 40

   0.002154163317560   0.001850191246125   0.001599214658173   0.001389653988286   0.001212923032396

  Columns 41 through 45

   0.001062579607516   0.000933721632073   0.000822564255585   0.000726143612900   0.000642107611371

  Columns 46 through 50

   0.000568566463548   0.000503984503096                   0                   0                   0

  Columns 51 through 55

                   0                   0                   0                   0                   0

  Columns 56 through 60

                   0                   0                   0                   0                   0

  Column 61

                   0


inner_code_BER =

  Columns 1 through 5

   0.085155667120949   0.081407055164332   0.077694174471144   0.074020929706927   0.070391314810034

  Columns 6 through 10

   0.066809437833591   0.063279557865719   0.059806133434610   0.056393879158999   0.053047823435821

  Columns 11 through 15

   0.049773354587201   0.046576236558964   0.043462569379817   0.040438666902034   0.037510828772315

  Columns 16 through 20

   0.034684998884867   0.031966329609640   0.029358704811556   0.026864303594123   0.024483297577252

  Columns 21 through 25

   0.022213761305949   0.020051846503218   0.017992248620851   0.016029006383264   0.014156744507010

  Columns 26 through 30

   0.012372596360139   0.010679136461888   0.009088314671588   0.007624631971604   0.006322279828543

  Columns 31 through 35

   0.005211171326380   0.004299371268813   0.003569308452591   0.002989377477988   0.002526839565515

  Columns 36 through 40

   0.002154163317560   0.001850191246125   0.001599214658173   0.001389653988286   0.001212923032396

  Columns 41 through 45

   0.001062579607516   0.000933721632073   0.000822564255585   0.000726143612900   0.000642107611371

  Columns 46 through 50

   0.000568566463548   0.000503984503096   0.000447100823967                   0                   0

  Columns 51 through 55

                   0                   0                   0                   0                   0

  Columns 56 through 60

                   0                   0                   0                   0                   0

  Column 61

                   0


inner_code_BER =

  Columns 1 through 5

   0.085155667120949   0.081407055164332   0.077694174471144   0.074020929706927   0.070391314810034

  Columns 6 through 10

   0.066809437833591   0.063279557865719   0.059806133434610   0.056393879158999   0.053047823435821

  Columns 11 through 15

   0.049773354587201   0.046576236558964   0.043462569379817   0.040438666902034   0.037510828772315

  Columns 16 through 20

   0.034684998884867   0.031966329609640   0.029358704811556   0.026864303594123   0.024483297577252

  Columns 21 through 25

   0.022213761305949   0.020051846503218   0.017992248620851   0.016029006383264   0.014156744507010

  Columns 26 through 30

   0.012372596360139   0.010679136461888   0.009088314671588   0.007624631971604   0.006322279828543

  Columns 31 through 35

   0.005211171326380   0.004299371268813   0.003569308452591   0.002989377477988   0.002526839565515

  Columns 36 through 40

   0.002154163317560   0.001850191246125   0.001599214658173   0.001389653988286   0.001212923032396

  Columns 41 through 45

   0.001062579607516   0.000933721632073   0.000822564255585   0.000726143612900   0.000642107611371

  Columns 46 through 50

   0.000568566463548   0.000503984503096   0.000447100823967   0.000396870288634                   0

  Columns 51 through 55

                   0                   0                   0                   0                   0

  Columns 56 through 60

                   0                   0                   0                   0                   0

  Column 61

                   0


inner_code_BER =

  Columns 1 through 5

   0.085155667120949   0.081407055164332   0.077694174471144   0.074020929706927   0.070391314810034

  Columns 6 through 10

   0.066809437833591   0.063279557865719   0.059806133434610   0.056393879158999   0.053047823435821

  Columns 11 through 15

   0.049773354587201   0.046576236558964   0.043462569379817   0.040438666902034   0.037510828772315

  Columns 16 through 20

   0.034684998884867   0.031966329609640   0.029358704811556   0.026864303594123   0.024483297577252

  Columns 21 through 25

   0.022213761305949   0.020051846503218   0.017992248620851   0.016029006383264   0.014156744507010

  Columns 26 through 30

   0.012372596360139   0.010679136461888   0.009088314671588   0.007624631971604   0.006322279828543

  Columns 31 through 35

   0.005211171326380   0.004299371268813   0.003569308452591   0.002989377477988   0.002526839565515

  Columns 36 through 40

   0.002154163317560   0.001850191246125   0.001599214658173   0.001389653988286   0.001212923032396

  Columns 41 through 45

   0.001062579607516   0.000933721632073   0.000822564255585   0.000726143612900   0.000642107611371

  Columns 46 through 50

   0.000568566463548   0.000503984503096   0.000447100823967   0.000396870288634   0.000352419115459

  Columns 51 through 55

                   0                   0                   0                   0                   0

  Columns 56 through 60

                   0                   0                   0                   0                   0

  Column 61

                   0


inner_code_BER =

  Columns 1 through 5

   0.085155667120949   0.081407055164332   0.077694174471144   0.074020929706927   0.070391314810034

  Columns 6 through 10

   0.066809437833591   0.063279557865719   0.059806133434610   0.056393879158999   0.053047823435821

  Columns 11 through 15

   0.049773354587201   0.046576236558964   0.043462569379817   0.040438666902034   0.037510828772315

  Columns 16 through 20

   0.034684998884867   0.031966329609640   0.029358704811556   0.026864303594123   0.024483297577252

  Columns 21 through 25

   0.022213761305949   0.020051846503218   0.017992248620851   0.016029006383264   0.014156744507010

  Columns 26 through 30

   0.012372596360139   0.010679136461888   0.009088314671588   0.007624631971604   0.006322279828543

  Columns 31 through 35

   0.005211171326380   0.004299371268813   0.003569308452591   0.002989377477988   0.002526839565515

  Columns 36 through 40

   0.002154163317560   0.001850191246125   0.001599214658173   0.001389653988286   0.001212923032396

  Columns 41 through 45

   0.001062579607516   0.000933721632073   0.000822564255585   0.000726143612900   0.000642107611371

  Columns 46 through 50

   0.000568566463548   0.000503984503096   0.000447100823967   0.000396870288634   0.000352419115459

  Columns 51 through 55

   0.000313011035129                   0                   0                   0                   0

  Columns 56 through 60

                   0                   0                   0                   0                   0

  Column 61

                   0


inner_code_BER =

  Columns 1 through 5

   0.085155667120949   0.081407055164332   0.077694174471144   0.074020929706927   0.070391314810034

  Columns 6 through 10

   0.066809437833591   0.063279557865719   0.059806133434610   0.056393879158999   0.053047823435821

  Columns 11 through 15

   0.049773354587201   0.046576236558964   0.043462569379817   0.040438666902034   0.037510828772315

  Columns 16 through 20

   0.034684998884867   0.031966329609640   0.029358704811556   0.026864303594123   0.024483297577252

  Columns 21 through 25

   0.022213761305949   0.020051846503218   0.017992248620851   0.016029006383264   0.014156744507010

  Columns 26 through 30

   0.012372596360139   0.010679136461888   0.009088314671588   0.007624631971604   0.006322279828543

  Columns 31 through 35

   0.005211171326380   0.004299371268813   0.003569308452591   0.002989377477988   0.002526839565515

  Columns 36 through 40

   0.002154163317560   0.001850191246125   0.001599214658173   0.001389653988286   0.001212923032396

  Columns 41 through 45

   0.001062579607516   0.000933721632073   0.000822564255585   0.000726143612900   0.000642107611371

  Columns 46 through 50

   0.000568566463548   0.000503984503096   0.000447100823967   0.000396870288634   0.000352419115459

  Columns 51 through 55

   0.000313011035129   0.000278021204988                   0                   0                   0

  Columns 56 through 60

                   0                   0                   0                   0                   0

  Column 61

                   0


inner_code_BER =

  Columns 1 through 5

   0.085155667120949   0.081407055164332   0.077694174471144   0.074020929706927   0.070391314810034

  Columns 6 through 10

   0.066809437833591   0.063279557865719   0.059806133434610   0.056393879158999   0.053047823435821

  Columns 11 through 15

   0.049773354587201   0.046576236558964   0.043462569379817   0.040438666902034   0.037510828772315

  Columns 16 through 20

   0.034684998884867   0.031966329609640   0.029358704811556   0.026864303594123   0.024483297577252

  Columns 21 through 25

   0.022213761305949   0.020051846503218   0.017992248620851   0.016029006383264   0.014156744507010

  Columns 26 through 30

   0.012372596360139   0.010679136461888   0.009088314671588   0.007624631971604   0.006322279828543

  Columns 31 through 35

   0.005211171326380   0.004299371268813   0.003569308452591   0.002989377477988   0.002526839565515

  Columns 36 through 40

   0.002154163317560   0.001850191246125   0.001599214658173   0.001389653988286   0.001212923032396

  Columns 41 through 45

   0.001062579607516   0.000933721632073   0.000822564255585   0.000726143612900   0.000642107611371

  Columns 46 through 50

   0.000568566463548   0.000503984503096   0.000447100823967   0.000396870288634   0.000352419115459

  Columns 51 through 55

   0.000313011035129   0.000278021204988   0.000246915886407                   0                   0

  Columns 56 through 60

                   0                   0                   0                   0                   0

  Column 61

                   0


inner_code_BER =

  Columns 1 through 5

   0.085155667120949   0.081407055164332   0.077694174471144   0.074020929706927   0.070391314810034

  Columns 6 through 10

   0.066809437833591   0.063279557865719   0.059806133434610   0.056393879158999   0.053047823435821

  Columns 11 through 15

   0.049773354587201   0.046576236558964   0.043462569379817   0.040438666902034   0.037510828772315

  Columns 16 through 20

   0.034684998884867   0.031966329609640   0.029358704811556   0.026864303594123   0.024483297577252

  Columns 21 through 25

   0.022213761305949   0.020051846503218   0.017992248620851   0.016029006383264   0.014156744507010

  Columns 26 through 30

   0.012372596360139   0.010679136461888   0.009088314671588   0.007624631971604   0.006322279828543

  Columns 31 through 35

   0.005211171326380   0.004299371268813   0.003569308452591   0.002989377477988   0.002526839565515

  Columns 36 through 40

   0.002154163317560   0.001850191246125   0.001599214658173   0.001389653988286   0.001212923032396

  Columns 41 through 45

   0.001062579607516   0.000933721632073   0.000822564255585   0.000726143612900   0.000642107611371

  Columns 46 through 50

   0.000568566463548   0.000503984503096   0.000447100823967   0.000396870288634   0.000352419115459

  Columns 51 through 55

   0.000313011035129   0.000278021204988   0.000246915886407   0.000219236452249                   0

  Columns 56 through 60

                   0                   0                   0                   0                   0

  Column 61

                   0


inner_code_BER =

  Columns 1 through 5

   0.085155667120949   0.081407055164332   0.077694174471144   0.074020929706927   0.070391314810034

  Columns 6 through 10

   0.066809437833591   0.063279557865719   0.059806133434610   0.056393879158999   0.053047823435821

  Columns 11 through 15

   0.049773354587201   0.046576236558964   0.043462569379817   0.040438666902034   0.037510828772315

  Columns 16 through 20

   0.034684998884867   0.031966329609640   0.029358704811556   0.026864303594123   0.024483297577252

  Columns 21 through 25

   0.022213761305949   0.020051846503218   0.017992248620851   0.016029006383264   0.014156744507010

  Columns 26 through 30

   0.012372596360139   0.010679136461888   0.009088314671588   0.007624631971604   0.006322279828543

  Columns 31 through 35

   0.005211171326380   0.004299371268813   0.003569308452591   0.002989377477988   0.002526839565515

  Columns 36 through 40

   0.002154163317560   0.001850191246125   0.001599214658173   0.001389653988286   0.001212923032396

  Columns 41 through 45

   0.001062579607516   0.000933721632073   0.000822564255585   0.000726143612900   0.000642107611371

  Columns 46 through 50

   0.000568566463548   0.000503984503096   0.000447100823967   0.000396870288634   0.000352419115459

  Columns 51 through 55

   0.000313011035129   0.000278021204988   0.000246915886407   0.000219236452249   0.000194586683084

  Columns 56 through 60

                   0                   0                   0                   0                   0

  Column 61

                   0


inner_code_BER =

  Columns 1 through 5

   0.085155667120949   0.081407055164332   0.077694174471144   0.074020929706927   0.070391314810034

  Columns 6 through 10

   0.066809437833591   0.063279557865719   0.059806133434610   0.056393879158999   0.053047823435821

  Columns 11 through 15

   0.049773354587201   0.046576236558964   0.043462569379817   0.040438666902034   0.037510828772315

  Columns 16 through 20

   0.034684998884867   0.031966329609640   0.029358704811556   0.026864303594123   0.024483297577252

  Columns 21 through 25

   0.022213761305949   0.020051846503218   0.017992248620851   0.016029006383264   0.014156744507010

  Columns 26 through 30

   0.012372596360139   0.010679136461888   0.009088314671588   0.007624631971604   0.006322279828543

  Columns 31 through 35

   0.005211171326380   0.004299371268813   0.003569308452591   0.002989377477988   0.002526839565515

  Columns 36 through 40

   0.002154163317560   0.001850191246125   0.001599214658173   0.001389653988286   0.001212923032396

  Columns 41 through 45

   0.001062579607516   0.000933721632073   0.000822564255585   0.000726143612900   0.000642107611371

  Columns 46 through 50

   0.000568566463548   0.000503984503096   0.000447100823967   0.000396870288634   0.000352419115459

  Columns 51 through 55

   0.000313011035129   0.000278021204988   0.000246915886407   0.000219236452249   0.000194586683084

  Columns 56 through 60

   0.000172622586726                   0                   0                   0                   0

  Column 61

                   0


inner_code_BER =

  Columns 1 through 5

   0.085155667120949   0.081407055164332   0.077694174471144   0.074020929706927   0.070391314810034

  Columns 6 through 10

   0.066809437833591   0.063279557865719   0.059806133434610   0.056393879158999   0.053047823435821

  Columns 11 through 15

   0.049773354587201   0.046576236558964   0.043462569379817   0.040438666902034   0.037510828772315

  Columns 16 through 20

   0.034684998884867   0.031966329609640   0.029358704811556   0.026864303594123   0.024483297577252

  Columns 21 through 25

   0.022213761305949   0.020051846503218   0.017992248620851   0.016029006383264   0.014156744507010

  Columns 26 through 30

   0.012372596360139   0.010679136461888   0.009088314671588   0.007624631971604   0.006322279828543

  Columns 31 through 35

   0.005211171326380   0.004299371268813   0.003569308452591   0.002989377477988   0.002526839565515

  Columns 36 through 40

   0.002154163317560   0.001850191246125   0.001599214658173   0.001389653988286   0.001212923032396

  Columns 41 through 45

   0.001062579607516   0.000933721632073   0.000822564255585   0.000726143612900   0.000642107611371

  Columns 46 through 50

   0.000568566463548   0.000503984503096   0.000447100823967   0.000396870288634   0.000352419115459

  Columns 51 through 55

   0.000313011035129   0.000278021204988   0.000246915886407   0.000219236452249   0.000194586683084

  Columns 56 through 60

   0.000172622586726   0.000153044172503                   0                   0                   0

  Column 61

                   0


inner_code_BER =

  Columns 1 through 5

   0.085155667120949   0.081407055164332   0.077694174471144   0.074020929706927   0.070391314810034

  Columns 6 through 10

   0.066809437833591   0.063279557865719   0.059806133434610   0.056393879158999   0.053047823435821

  Columns 11 through 15

   0.049773354587201   0.046576236558964   0.043462569379817   0.040438666902034   0.037510828772315

  Columns 16 through 20

   0.034684998884867   0.031966329609640   0.029358704811556   0.026864303594123   0.024483297577252

  Columns 21 through 25

   0.022213761305949   0.020051846503218   0.017992248620851   0.016029006383264   0.014156744507010

  Columns 26 through 30

   0.012372596360139   0.010679136461888   0.009088314671588   0.007624631971604   0.006322279828543

  Columns 31 through 35

   0.005211171326380   0.004299371268813   0.003569308452591   0.002989377477988   0.002526839565515

  Columns 36 through 40

   0.002154163317560   0.001850191246125   0.001599214658173   0.001389653988286   0.001212923032396

  Columns 41 through 45

   0.001062579607516   0.000933721632073   0.000822564255585   0.000726143612900   0.000642107611371

  Columns 46 through 50

   0.000568566463548   0.000503984503096   0.000447100823967   0.000396870288634   0.000352419115459

  Columns 51 through 55

   0.000313011035129   0.000278021204988   0.000246915886407   0.000219236452249   0.000194586683084

  Columns 56 through 60

   0.000172622586726   0.000153044172503   0.000135588753454                   0                   0

  Column 61

                   0


inner_code_BER =

  Columns 1 through 5

   0.085155667120949   0.081407055164332   0.077694174471144   0.074020929706927   0.070391314810034

  Columns 6 through 10

   0.066809437833591   0.063279557865719   0.059806133434610   0.056393879158999   0.053047823435821

  Columns 11 through 15

   0.049773354587201   0.046576236558964   0.043462569379817   0.040438666902034   0.037510828772315

  Columns 16 through 20

   0.034684998884867   0.031966329609640   0.029358704811556   0.026864303594123   0.024483297577252

  Columns 21 through 25

   0.022213761305949   0.020051846503218   0.017992248620851   0.016029006383264   0.014156744507010

  Columns 26 through 30

   0.012372596360139   0.010679136461888   0.009088314671588   0.007624631971604   0.006322279828543

  Columns 31 through 35

   0.005211171326380   0.004299371268813   0.003569308452591   0.002989377477988   0.002526839565515

  Columns 36 through 40

   0.002154163317560   0.001850191246125   0.001599214658173   0.001389653988286   0.001212923032396

  Columns 41 through 45

   0.001062579607516   0.000933721632073   0.000822564255585   0.000726143612900   0.000642107611371

  Columns 46 through 50

   0.000568566463548   0.000503984503096   0.000447100823967   0.000396870288634   0.000352419115459

  Columns 51 through 55

   0.000313011035129   0.000278021204988   0.000246915886407   0.000219236452249   0.000194586683084

  Columns 56 through 60

   0.000172622586726   0.000153044172503   0.000135588753454   0.000120025453042                   0

  Column 61

                   0


inner_code_BER =

  Columns 1 through 5

   0.085155667120949   0.081407055164332   0.077694174471144   0.074020929706927   0.070391314810034

  Columns 6 through 10

   0.066809437833591   0.063279557865719   0.059806133434610   0.056393879158999   0.053047823435821

  Columns 11 through 15

   0.049773354587201   0.046576236558964   0.043462569379817   0.040438666902034   0.037510828772315

  Columns 16 through 20

   0.034684998884867   0.031966329609640   0.029358704811556   0.026864303594123   0.024483297577252

  Columns 21 through 25

   0.022213761305949   0.020051846503218   0.017992248620851   0.016029006383264   0.014156744507010

  Columns 26 through 30

   0.012372596360139   0.010679136461888   0.009088314671588   0.007624631971604   0.006322279828543

  Columns 31 through 35

   0.005211171326380   0.004299371268813   0.003569308452591   0.002989377477988   0.002526839565515

  Columns 36 through 40

   0.002154163317560   0.001850191246125   0.001599214658173   0.001389653988286   0.001212923032396

  Columns 41 through 45

   0.001062579607516   0.000933721632073   0.000822564255585   0.000726143612900   0.000642107611371

  Columns 46 through 50

   0.000568566463548   0.000503984503096   0.000447100823967   0.000396870288634   0.000352419115459

  Columns 51 through 55

   0.000313011035129   0.000278021204988   0.000246915886407   0.000219236452249   0.000194586683084

  Columns 56 through 60

   0.000172622586726   0.000153044172503   0.000135588753454   0.000120025453042   0.000106150669017

  Column 61

                   0


inner_code_BER =

  Columns 1 through 5

   0.085155667120949   0.081407055164332   0.077694174471144   0.074020929706927   0.070391314810034

  Columns 6 through 10

   0.066809437833591   0.063279557865719   0.059806133434610   0.056393879158999   0.053047823435821

  Columns 11 through 15

   0.049773354587201   0.046576236558964   0.043462569379817   0.040438666902034   0.037510828772315

  Columns 16 through 20

   0.034684998884867   0.031966329609640   0.029358704811556   0.026864303594123   0.024483297577252

  Columns 21 through 25

   0.022213761305949   0.020051846503218   0.017992248620851   0.016029006383264   0.014156744507010

  Columns 26 through 30

   0.012372596360139   0.010679136461888   0.009088314671588   0.007624631971604   0.006322279828543

  Columns 31 through 35

   0.005211171326380   0.004299371268813   0.003569308452591   0.002989377477988   0.002526839565515

  Columns 36 through 40

   0.002154163317560   0.001850191246125   0.001599214658173   0.001389653988286   0.001212923032396

  Columns 41 through 45

   0.001062579607516   0.000933721632073   0.000822564255585   0.000726143612900   0.000642107611371

  Columns 46 through 50

   0.000568566463548   0.000503984503096   0.000447100823967   0.000396870288634   0.000352419115459

  Columns 51 through 55

   0.000313011035129   0.000278021204988   0.000246915886407   0.000219236452249   0.000194586683084

  Columns 56 through 60

   0.000172622586726   0.000153044172503   0.000135588753454   0.000120025453042   0.000106150669017

  Column 61

   0.000093784303601

µ±Ç°ÄÚÂëÎóÂëÂÊÒÑµÍÓÚÄ¿±êÎóÂëÂÊ£¬ÐÅÔë±ÈÎª6.00 dB
Elapsed time is 25331.369377 seconds.
