# Supplementary material for: An Efficient Design of Systematic Rateless Codes
Source: Hindawi journal article supplement (doi:10.1155/2020/8068414), 2020-05-19
Supplement: f1 [file 8068414.f1.zip › supplementary files/Matlab_code_for_Figure1/BER_by_DDE/仿真结果/BER_by_DDE_awgn_rate_1_2_dist1_Ns.txt]

ÐÅµÀÎªAWGNÐÅµÀ

EbN0indB_vec =

  Columns 1 through 5

                   0   0.100000000000000   0.200000000000000   0.300000000000000   0.400000000000000

  Columns 6 through 10

   0.500000000000000   0.600000000000000   0.700000000000000   0.800000000000000   0.900000000000000

  Columns 11 through 15

   1.000000000000000   1.100000000000000   1.200000000000000   1.300000000000000   1.400000000000000

  Columns 16 through 20

   1.500000000000000   1.600000000000000   1.700000000000000   1.800000000000000   1.900000000000000

  Columns 21 through 25

   2.000000000000000   2.100000000000000   2.200000000000000   2.300000000000000   2.400000000000000

  Columns 26 through 30

   2.500000000000000   2.600000000000000   2.700000000000000   2.800000000000000   2.900000000000000

  Column 31

   3.000000000000000

ÖÆ±í³É¹¦
µ±Ç°Ñ¡ÔñRaptorÂëµ±Ç°Ñ¡Ôñ·ÇÏµÍ³Âë
×ÜÂëÂÊ=0.50000, ÍâÂëÂëÂÊ=0.98039, ÄÚÂëÂëÂÊ=0.51000

out_node_index =

     1     2     3     4     5    11    40


ans =

  Columns 1 through 5

   0.009670000000000   0.450250000000000   0.209370000000000   0.023320000000000   0.147350000000000

  Columns 6 through 7

   0.112249000000000   0.047550000000000


ans =

  Columns 1 through 5

   0.009670000000000   0.450250000000000   0.209370000000000   0.023320000000000   0.147350000000000

  Columns 6 through 7

   0.112249000000000   0.047550000000000


inner_code_BER =

  Columns 1 through 5

   0.317697154702807                   0                   0                   0                   0

  Columns 6 through 10

                   0                   0                   0                   0                   0

  Columns 11 through 15

                   0                   0                   0                   0                   0

  Columns 16 through 20

                   0                   0                   0                   0                   0

  Columns 21 through 25

                   0                   0                   0                   0                   0

  Columns 26 through 30

                   0                   0                   0                   0                   0

  Column 31

                   0


outer_code_BER =

  Columns 1 through 5

   0.317697154702807                   0                   0                   0                   0

  Columns 6 through 10

                   0                   0                   0                   0                   0

  Columns 11 through 15

                   0                   0                   0                   0                   0

  Columns 16 through 20

                   0                   0                   0                   0                   0

  Columns 21 through 25

                   0                   0                   0                   0                   0

  Columns 26 through 30

                   0                   0                   0                   0                   0

  Column 31

                   0


inner_code_BER =

  Columns 1 through 5

   0.317697154702807   0.274317843817639                   0                   0                   0

  Columns 6 through 10

                   0                   0                   0                   0                   0

  Columns 11 through 15

                   0                   0                   0                   0                   0

  Columns 16 through 20

                   0                   0                   0                   0                   0

  Columns 21 through 25

                   0                   0                   0                   0                   0

  Columns 26 through 30

                   0                   0                   0                   0                   0

  Column 31

                   0


outer_code_BER =

  Columns 1 through 5

   0.317697154702807   0.274317843817639                   0                   0                   0

  Columns 6 through 10

                   0                   0                   0                   0                   0

  Columns 11 through 15

                   0                   0                   0                   0                   0

  Columns 16 through 20

                   0                   0                   0                   0                   0

  Columns 21 through 25

                   0                   0                   0                   0                   0

  Columns 26 through 30

                   0                   0                   0                   0                   0

  Column 31

                   0


inner_code_BER =

  Columns 1 through 5

   0.317697154702807   0.274317843817639   0.196672763889302                   0                   0

  Columns 6 through 10

                   0                   0                   0                   0                   0

  Columns 11 through 15

                   0                   0                   0                   0                   0

  Columns 16 through 20

                   0                   0                   0                   0                   0

  Columns 21 through 25

                   0                   0                   0                   0                   0

  Columns 26 through 30

                   0                   0                   0                   0                   0

  Column 31

                   0


outer_code_BER =

  Columns 1 through 5

   0.317697154702807   0.274317843817639   0.196672763889303                   0                   0

  Columns 6 through 10

                   0                   0                   0                   0                   0

  Columns 11 through 15

                   0                   0                   0                   0                   0

  Columns 16 through 20

                   0                   0                   0                   0                   0

  Columns 21 through 25

                   0                   0                   0                   0                   0

  Columns 26 through 30

                   0                   0                   0                   0                   0

  Column 31

                   0


inner_code_BER =

  Columns 1 through 5

   0.317697154702807   0.274317843817639   0.196672763889302   0.083178254457418                   0

  Columns 6 through 10

                   0                   0                   0                   0                   0

  Columns 11 through 15

                   0                   0                   0                   0                   0

  Columns 16 through 20

                   0                   0                   0                   0                   0

  Columns 21 through 25

                   0                   0                   0                   0                   0

  Columns 26 through 30

                   0                   0                   0                   0                   0

  Column 31

                   0


outer_code_BER =

  Columns 1 through 5

   0.317697154702807   0.274317843817639   0.196672763889303   0.083178254457419                   0

  Columns 6 through 10

                   0                   0                   0                   0                   0

  Columns 11 through 15

                   0                   0                   0                   0                   0

  Columns 16 through 20

                   0                   0                   0                   0                   0

  Columns 21 through 25

                   0                   0                   0                   0                   0

  Columns 26 through 30

                   0                   0                   0                   0                   0

  Column 31

                   0


inner_code_BER =

  Columns 1 through 5

   0.317697154702807   0.274317843817639   0.196672763889302   0.083178254457418   0.004004094386988

  Columns 6 through 10

                   0                   0                   0                   0                   0

  Columns 11 through 15

                   0                   0                   0                   0                   0

  Columns 16 through 20

                   0                   0                   0                   0                   0

  Columns 21 through 25

                   0                   0                   0                   0                   0

  Columns 26 through 30

                   0                   0                   0                   0                   0

  Column 31

                   0


outer_code_BER =

  Columns 1 through 5

   0.317697154702807   0.274317843817639   0.196672763889303   0.083178254457419   0.002425997855228

  Columns 6 through 10

                   0                   0                   0                   0                   0

  Columns 11 through 15

                   0                   0                   0                   0                   0

  Columns 16 through 20

                   0                   0                   0                   0                   0

  Columns 21 through 25

                   0                   0                   0                   0                   0

  Columns 26 through 30

                   0                   0                   0                   0                   0

  Column 31

                   0


inner_code_BER =

  Columns 1 through 5

   0.317697154702807   0.274317843817639   0.196672763889302   0.083178254457418   0.004004094386988

  Columns 6 through 10

   0.003179815039552                   0                   0                   0                   0

  Columns 11 through 15

                   0                   0                   0                   0                   0

  Columns 16 through 20

                   0                   0                   0                   0                   0

  Columns 21 through 25

                   0                   0                   0                   0                   0

  Columns 26 through 30

                   0                   0                   0                   0                   0

  Column 31

                   0


outer_code_BER =

  Columns 1 through 5

   0.317697154702807   0.274317843817639   0.196672763889303   0.083178254457419   0.002425997855228

  Columns 6 through 10

   0.000000001698956                   0                   0                   0                   0

  Columns 11 through 15

                   0                   0                   0                   0                   0

  Columns 16 through 20

                   0                   0                   0                   0                   0

  Columns 21 through 25

                   0                   0                   0                   0                   0

  Columns 26 through 30

                   0                   0                   0                   0                   0

  Column 31

                   0

µ±Ç°ÍâÂëÎóÂëÂÊÒÑµÍÓÚÄ¿±êÎóÂëÂÊ£¬ÐÅÔë±ÈÎª0.50 dB

inner_code_BER =

  Columns 1 through 5

   0.317697154702807   0.274317843817639   0.196672763889302   0.083178254457418   0.004004094386988

  Columns 6 through 10

   0.003179815039552   0.002628328682212                   0                   0                   0

  Columns 11 through 15

                   0                   0                   0                   0                   0

  Columns 16 through 20

                   0                   0                   0                   0                   0

  Columns 21 through 25

                   0                   0                   0                   0                   0

  Columns 26 through 30

                   0                   0                   0                   0                   0

  Column 31

                   0


inner_code_BER =

  Columns 1 through 5

   0.317697154702807   0.274317843817639   0.196672763889302   0.083178254457418   0.004004094386988

  Columns 6 through 10

   0.003179815039552   0.002628328682212   0.002221487160952                   0                   0

  Columns 11 through 15

                   0                   0                   0                   0                   0

  Columns 16 through 20

                   0                   0                   0                   0                   0

  Columns 21 through 25

                   0                   0                   0                   0                   0

  Columns 26 through 30

                   0                   0                   0                   0                   0

  Column 31

                   0


inner_code_BER =

  Columns 1 through 5

   0.317697154702807   0.274317843817639   0.196672763889302   0.083178254457418   0.004004094386988

  Columns 6 through 10

   0.003179815039552   0.002628328682212   0.002221487160952   0.001904957230126                   0

  Columns 11 through 15

                   0                   0                   0                   0                   0

  Columns 16 through 20

                   0                   0                   0                   0                   0

  Columns 21 through 25

                   0                   0                   0                   0                   0

  Columns 26 through 30

                   0                   0                   0                   0                   0

  Column 31

                   0


inner_code_BER =

  Columns 1 through 5

   0.317697154702807   0.274317843817639   0.196672763889302   0.083178254457418   0.004004094386988

  Columns 6 through 10

   0.003179815039552   0.002628328682212   0.002221487160952   0.001904957230126   0.001650262543396

  Columns 11 through 15

                   0                   0                   0                   0                   0

  Columns 16 through 20

                   0                   0                   0                   0                   0

  Columns 21 through 25

                   0                   0                   0                   0                   0

  Columns 26 through 30

                   0                   0                   0                   0                   0

  Column 31

                   0


inner_code_BER =

  Columns 1 through 5

   0.317697154702807   0.274317843817639   0.196672763889302   0.083178254457418   0.004004094386988

  Columns 6 through 10

   0.003179815039552   0.002628328682212   0.002221487160952   0.001904957230126   0.001650262543396

  Columns 11 through 15

   0.001440510459295                   0                   0                   0                   0

  Columns 16 through 20

                   0                   0                   0                   0                   0

  Columns 21 through 25

                   0                   0                   0                   0                   0

  Columns 26 through 30

                   0                   0                   0                   0                   0

  Column 31

                   0


inner_code_BER =

  Columns 1 through 5

   0.317697154702807   0.274317843817639   0.196672763889302   0.083178254457418   0.004004094386988

  Columns 6 through 10

   0.003179815039552   0.002628328682212   0.002221487160952   0.001904957230126   0.001650262543396

  Columns 11 through 15

   0.001440510459295   0.001264819269352                   0                   0                   0

  Columns 16 through 20

                   0                   0                   0                   0                   0

  Columns 21 through 25

                   0                   0                   0                   0                   0

  Columns 26 through 30

                   0                   0                   0                   0                   0

  Column 31

                   0


inner_code_BER =

  Columns 1 through 5

   0.317697154702807   0.274317843817639   0.196672763889302   0.083178254457418   0.004004094386988

  Columns 6 through 10

   0.003179815039552   0.002628328682212   0.002221487160952   0.001904957230126   0.001650262543396

  Columns 11 through 15

   0.001440510459295   0.001264819269352   0.001115752513975                   0                   0

  Columns 16 through 20

                   0                   0                   0                   0                   0

  Columns 21 through 25

                   0                   0                   0                   0                   0

  Columns 26 through 30

                   0                   0                   0                   0                   0

  Column 31

                   0


inner_code_BER =

  Columns 1 through 5

   0.317697154702807   0.274317843817639   0.196672763889302   0.083178254457418   0.004004094386988

  Columns 6 through 10

   0.003179815039552   0.002628328682212   0.002221487160952   0.001904957230126   0.001650262543396

  Columns 11 through 15

   0.001440510459295   0.001264819269352   0.001115752513975   0.000987996532685                   0

  Columns 16 through 20

                   0                   0                   0                   0                   0

  Columns 21 through 25

                   0                   0                   0                   0                   0

  Columns 26 through 30

                   0                   0                   0                   0                   0

  Column 31

                   0


inner_code_BER =

  Columns 1 through 5

   0.317697154702807   0.274317843817639   0.196672763889302   0.083178254457418   0.004004094386988

  Columns 6 through 10

   0.003179815039552   0.002628328682212   0.002221487160952   0.001904957230126   0.001650262543396

  Columns 11 through 15

   0.001440510459295   0.001264819269352   0.001115752513975   0.000987996532685   0.000877619875988

  Columns 16 through 20

                   0                   0                   0                   0                   0

  Columns 21 through 25

                   0                   0                   0                   0                   0

  Columns 26 through 30

                   0                   0                   0                   0                   0

  Column 31

                   0


inner_code_BER =

  Columns 1 through 5

   0.317697154702807   0.274317843817639   0.196672763889302   0.083178254457418   0.004004094386988

  Columns 6 through 10

   0.003179815039552   0.002628328682212   0.002221487160952   0.001904957230126   0.001650262543396

  Columns 11 through 15

   0.001440510459295   0.001264819269352   0.001115752513975   0.000987996532685   0.000877619875988

  Columns 16 through 20

   0.000781631240135                   0                   0                   0                   0

  Columns 21 through 25

                   0                   0                   0                   0                   0

  Columns 26 through 30

                   0                   0                   0                   0                   0

  Column 31

                   0


inner_code_BER =

  Columns 1 through 5

   0.317697154702807   0.274317843817639   0.196672763889302   0.083178254457418   0.004004094386988

  Columns 6 through 10

   0.003179815039552   0.002628328682212   0.002221487160952   0.001904957230126   0.001650262543396

  Columns 11 through 15

   0.001440510459295   0.001264819269352   0.001115752513975   0.000987996532685   0.000877619875988

  Columns 16 through 20

   0.000781631240135   0.000697701852523                   0                   0                   0

  Columns 21 through 25

                   0                   0                   0                   0                   0

  Columns 26 through 30

                   0                   0                   0                   0                   0

  Column 31

                   0


inner_code_BER =

  Columns 1 through 5

   0.317697154702807   0.274317843817639   0.196672763889302   0.083178254457418   0.004004094386988

  Columns 6 through 10

   0.003179815039552   0.002628328682212   0.002221487160952   0.001904957230126   0.001650262543396

  Columns 11 through 15

   0.001440510459295   0.001264819269352   0.001115752513975   0.000987996532685   0.000877619875988

  Columns 16 through 20

   0.000781631240135   0.000697701852523   0.000623983756266                   0                   0

  Columns 21 through 25

                   0                   0                   0                   0                   0

  Columns 26 through 30

                   0                   0                   0                   0                   0

  Column 31

                   0


inner_code_BER =

  Columns 1 through 5

   0.317697154702807   0.274317843817639   0.196672763889302   0.083178254457418   0.004004094386988

  Columns 6 through 10

   0.003179815039552   0.002628328682212   0.002221487160952   0.001904957230126   0.001650262543396

  Columns 11 through 15

   0.001440510459295   0.001264819269352   0.001115752513975   0.000987996532685   0.000877619875988

  Columns 16 through 20

   0.000781631240135   0.000697701852523   0.000623983756266   0.000558986690268                   0

  Columns 21 through 25

                   0                   0                   0                   0                   0

  Columns 26 through 30

                   0                   0                   0                   0                   0

  Column 31

                   0


inner_code_BER =

  Columns 1 through 5

   0.317697154702807   0.274317843817639   0.196672763889302   0.083178254457418   0.004004094386988

  Columns 6 through 10

   0.003179815039552   0.002628328682212   0.002221487160952   0.001904957230126   0.001650262543396

  Columns 11 through 15

   0.001440510459295   0.001264819269352   0.001115752513975   0.000987996532685   0.000877619875988

  Columns 16 through 20

   0.000781631240135   0.000697701852523   0.000623983756266   0.000558986690268   0.000501492196410

  Columns 21 through 25

                   0                   0                   0                   0                   0

  Columns 26 through 30

                   0                   0                   0                   0                   0

  Column 31

                   0


inner_code_BER =

  Columns 1 through 5

   0.317697154702807   0.274317843817639   0.196672763889302   0.083178254457418   0.004004094386988

  Columns 6 through 10

   0.003179815039552   0.002628328682212   0.002221487160952   0.001904957230126   0.001650262543396

  Columns 11 through 15

   0.001440510459295   0.001264819269352   0.001115752513975   0.000987996532685   0.000877619875988

  Columns 16 through 20

   0.000781631240135   0.000697701852523   0.000623983756266   0.000558986690268   0.000501492196410

  Columns 21 through 25

   0.000450492174934                   0                   0                   0                   0

  Columns 26 through 30

                   0                   0                   0                   0                   0

  Column 31

                   0


inner_code_BER =

  Columns 1 through 5

   0.317697154702807   0.274317843817639   0.196672763889302   0.083178254457418   0.004004094386988

  Columns 6 through 10

   0.003179815039552   0.002628328682212   0.002221487160952   0.001904957230126   0.001650262543396

  Columns 11 through 15

   0.001440510459295   0.001264819269352   0.001115752513975   0.000987996532685   0.000877619875988

  Columns 16 through 20

   0.000781631240135   0.000697701852523   0.000623983756266   0.000558986690268   0.000501492196410

  Columns 21 through 25

   0.000450492174934   0.000405143960173                   0                   0                   0

  Columns 26 through 30

                   0                   0                   0                   0                   0

  Column 31

                   0


inner_code_BER =

  Columns 1 through 5

   0.317697154702807   0.274317843817639   0.196672763889302   0.083178254457418   0.004004094386988

  Columns 6 through 10

   0.003179815039552   0.002628328682212   0.002221487160952   0.001904957230126   0.001650262543396

  Columns 11 through 15

   0.001440510459295   0.001264819269352   0.001115752513975   0.000987996532685   0.000877619875988

  Columns 16 through 20

   0.000781631240135   0.000697701852523   0.000623983756266   0.000558986690268   0.000501492196410

  Columns 21 through 25

   0.000450492174934   0.000405143960173   0.000364736840033                   0                   0

  Columns 26 through 30

                   0                   0                   0                   0                   0

  Column 31

                   0


inner_code_BER =

  Columns 1 through 5

   0.317697154702807   0.274317843817639   0.196672763889302   0.083178254457418   0.004004094386988

  Columns 6 through 10

   0.003179815039552   0.002628328682212   0.002221487160952   0.001904957230126   0.001650262543396

  Columns 11 through 15

   0.001440510459295   0.001264819269352   0.001115752513975   0.000987996532685   0.000877619875988

  Columns 16 through 20

   0.000781631240135   0.000697701852523   0.000623983756266   0.000558986690268   0.000501492196410

  Columns 21 through 25

   0.000450492174934   0.000405143960173   0.000364736840033   0.000328666677345                   0

  Columns 26 through 30

                   0                   0                   0                   0                   0

  Column 31

                   0


inner_code_BER =

  Columns 1 through 5

   0.317697154702807   0.274317843817639   0.196672763889302   0.083178254457418   0.004004094386988

  Columns 6 through 10

   0.003179815039552   0.002628328682212   0.002221487160952   0.001904957230126   0.001650262543396

  Columns 11 through 15

   0.001440510459295   0.001264819269352   0.001115752513975   0.000987996532685   0.000877619875988

  Columns 16 through 20

   0.000781631240135   0.000697701852523   0.000623983756266   0.000558986690268   0.000501492196410

  Columns 21 through 25

   0.000450492174934   0.000405143960173   0.000364736840033   0.000328666677345   0.000296416379021

  Columns 26 through 30

                   0                   0                   0                   0                   0

  Column 31

                   0


inner_code_BER =

  Columns 1 through 5

   0.317697154702807   0.274317843817639   0.196672763889302   0.083178254457418   0.004004094386988

  Columns 6 through 10

   0.003179815039552   0.002628328682212   0.002221487160952   0.001904957230126   0.001650262543396

  Columns 11 through 15

   0.001440510459295   0.001264819269352   0.001115752513975   0.000987996532685   0.000877619875988

  Columns 16 through 20

   0.000781631240135   0.000697701852523   0.000623983756266   0.000558986690268   0.000501492196410

  Columns 21 through 25

   0.000450492174934   0.000405143960173   0.000364736840033   0.000328666677345   0.000296416379021

  Columns 26 through 30

   0.000267540659452                   0                   0                   0                   0

  Column 31

                   0


inner_code_BER =

  Columns 1 through 5

   0.317697154702807   0.274317843817639   0.196672763889302   0.083178254457418   0.004004094386988

  Columns 6 through 10

   0.003179815039552   0.002628328682212   0.002221487160952   0.001904957230126   0.001650262543396

  Columns 11 through 15

   0.001440510459295   0.001264819269352   0.001115752513975   0.000987996532685   0.000877619875988

  Columns 16 through 20

   0.000781631240135   0.000697701852523   0.000623983756266   0.000558986690268   0.000501492196410

  Columns 21 through 25

   0.000450492174934   0.000405143960173   0.000364736840033   0.000328666677345   0.000296416379021

  Columns 26 through 30

   0.000267540659452   0.000241654006599                   0                   0                   0

  Column 31

                   0


inner_code_BER =

  Columns 1 through 5

   0.317697154702807   0.274317843817639   0.196672763889302   0.083178254457418   0.004004094386988

  Columns 6 through 10

   0.003179815039552   0.002628328682212   0.002221487160952   0.001904957230126   0.001650262543396

  Columns 11 through 15

   0.001440510459295   0.001264819269352   0.001115752513975   0.000987996532685   0.000877619875988

  Columns 16 through 20

   0.000781631240135   0.000697701852523   0.000623983756266   0.000558986690268   0.000501492196410

  Columns 21 through 25

   0.000450492174934   0.000405143960173   0.000364736840033   0.000328666677345   0.000296416379021

  Columns 26 through 30

   0.000267540659452   0.000241654006599   0.000218421070381                   0                   0

  Column 31

                   0


inner_code_BER =

  Columns 1 through 5

   0.317697154702807   0.274317843817639   0.196672763889302   0.083178254457418   0.004004094386988

  Columns 6 through 10

   0.003179815039552   0.002628328682212   0.002221487160952   0.001904957230126   0.001650262543396

  Columns 11 through 15

   0.001440510459295   0.001264819269352   0.001115752513975   0.000987996532685   0.000877619875988

  Columns 16 through 20

   0.000781631240135   0.000697701852523   0.000623983756266   0.000558986690268   0.000501492196410

  Columns 21 through 25

   0.000450492174934   0.000405143960173   0.000364736840033   0.000328666677345   0.000296416379021

  Columns 26 through 30

   0.000267540659452   0.000241654006599   0.000218421070381   0.000197548906652                   0

  Column 31

                   0


inner_code_BER =

  Columns 1 through 5

   0.317697154702807   0.274317843817639   0.196672763889302   0.083178254457418   0.004004094386988

  Columns 6 through 10

   0.003179815039552   0.002628328682212   0.002221487160952   0.001904957230126   0.001650262543396

  Columns 11 through 15

   0.001440510459295   0.001264819269352   0.001115752513975   0.000987996532685   0.000877619875988

  Columns 16 through 20

   0.000781631240135   0.000697701852523   0.000623983756266   0.000558986690268   0.000501492196410

  Columns 21 through 25

   0.000450492174934   0.000405143960173   0.000364736840033   0.000328666677345   0.000296416379021

  Columns 26 through 30

   0.000267540659452   0.000241654006599   0.000218421070381   0.000197548906652   0.000178780659317

  Column 31

                   0


inner_code_BER =

  Columns 1 through 5

   0.317697154702807   0.274317843817639   0.196672763889302   0.083178254457418   0.004004094386988

  Columns 6 through 10

   0.003179815039552   0.002628328682212   0.002221487160952   0.001904957230126   0.001650262543396

  Columns 11 through 15

   0.001440510459295   0.001264819269352   0.001115752513975   0.000987996532685   0.000877619875988

  Columns 16 through 20

   0.000781631240135   0.000697701852523   0.000623983756266   0.000558986690268   0.000501492196410

  Columns 21 through 25

   0.000450492174934   0.000405143960173   0.000364736840033   0.000328666677345   0.000296416379021

  Columns 26 through 30

   0.000267540659452   0.000241654006599   0.000218421070381   0.000197548906652   0.000178780659317

  Column 31

   0.000161890369062

Elapsed time is 6891.778806 seconds.
