# Supplementary material for: An Efficient Design of Systematic Rateless Codes
Source: Hindawi journal article supplement (doi:10.1155/2020/8068414), 2020-05-19
Supplement: f1 [file 8068414.f1.zip › supplementary files/Matlab_code_for_Figure1/BER_by_DDE/仿真结果/BER_by_DDE_awgn_rate_1_2_dist1_s.txt]

�ŵ�ΪAWGN�ŵ�

EbN0indB_vec =

  Columns 1 through 5

                   0   0.100000000000000   0.200000000000000   0.300000000000000   0.400000000000000

  Columns 6 through 10

   0.500000000000000   0.600000000000000   0.700000000000000   0.800000000000000   0.900000000000000

  Columns 11 through 15

   1.000000000000000   1.100000000000000   1.200000000000000   1.300000000000000   1.400000000000000

  Columns 16 through 20

   1.500000000000000   1.600000000000000   1.700000000000000   1.800000000000000   1.900000000000000

  Columns 21 through 25

   2.000000000000000   2.100000000000000   2.200000000000000   2.300000000000000   2.400000000000000

  Columns 26 through 30

   2.500000000000000   2.600000000000000   2.700000000000000   2.800000000000000   2.900000000000000

  Columns 31 through 35

   3.000000000000000   3.100000000000000   3.200000000000000   3.300000000000000   3.400000000000000

  Columns 36 through 40

   3.500000000000000   3.600000000000000   3.700000000000000   3.800000000000000   3.900000000000000

  Columns 41 through 45

   4.000000000000000   4.100000000000000   4.200000000000000   4.300000000000000   4.400000000000000

  Columns 46 through 50

   4.500000000000000   4.600000000000000   4.700000000000000   4.800000000000000   4.900000000000000

  Columns 51 through 55

   5.000000000000000   5.100000000000000   5.200000000000000   5.300000000000000   5.400000000000000

  Columns 56 through 60

   5.500000000000000   5.600000000000000   5.700000000000000   5.800000000000000   5.900000000000000

  Column 61

   6.000000000000000

�Ʊ��ɹ�
��ǰѡ��Raptor�뵱ǰѡ��ϵͳ��
������=0.50000, ��������=0.98039, ��������=0.51000

out_node_index =

     1     2     3     4     5    11    40


ans =

  Columns 1 through 5

   0.009670000000000   0.450250000000000   0.209370000000000   0.023320000000000   0.147350000000000

  Columns 6 through 7

   0.112249000000000   0.047550000000000


ans =

  Columns 1 through 5

   0.009670000000000   0.450250000000000   0.209370000000000   0.023320000000000   0.147350000000000

  Columns 6 through 7

   0.112249000000000   0.047550000000000


inner_code_BER =

  Columns 1 through 5

   0.085397029963518                   0                   0                   0                   0

  Columns 6 through 10

                   0                   0                   0                   0                   0

  Columns 11 through 15

                   0                   0                   0                   0                   0

  Columns 16 through 20

                   0                   0                   0                   0                   0

  Columns 21 through 25

                   0                   0                   0                   0                   0

  Columns 26 through 30

                   0                   0                   0                   0                   0

  Columns 31 through 35

                   0                   0                   0                   0                   0

  Columns 36 through 40

                   0                   0                   0                   0                   0

  Columns 41 through 45

                   0                   0                   0                   0                   0

  Columns 46 through 50

                   0                   0                   0                   0                   0

  Columns 51 through 55

                   0                   0                   0                   0                   0

  Columns 56 through 60

                   0                   0                   0                   0                   0

  Column 61

                   0


outer_code_BER =

  Columns 1 through 5

   0.085397029963518                   0                   0                   0                   0

  Columns 6 through 10

                   0                   0                   0                   0                   0

  Columns 11 through 15

                   0                   0                   0                   0                   0

  Columns 16 through 20

                   0                   0                   0                   0                   0

  Columns 21 through 25

                   0                   0                   0                   0                   0

  Columns 26 through 30

                   0                   0                   0                   0                   0

  Columns 31 through 35

                   0                   0                   0                   0                   0

  Columns 36 through 40

                   0                   0                   0                   0                   0

  Columns 41 through 45

                   0                   0                   0                   0                   0

  Columns 46 through 50

                   0                   0                   0                   0                   0

  Columns 51 through 55

                   0                   0                   0                   0                   0

  Columns 56 through 60

                   0                   0                   0                   0                   0

  Column 61

                   0


inner_code_BER =

  Columns 1 through 5

   0.085397029963518   0.081516509511755                   0                   0                   0

  Columns 6 through 10

                   0                   0                   0                   0                   0

  Columns 11 through 15

                   0                   0                   0                   0                   0

  Columns 16 through 20

                   0                   0                   0                   0                   0

  Columns 21 through 25

                   0                   0                   0                   0                   0

  Columns 26 through 30

                   0                   0                   0                   0                   0

  Columns 31 through 35

                   0                   0                   0                   0                   0

  Columns 36 through 40

                   0                   0                   0                   0                   0

  Columns 41 through 45

                   0                   0                   0                   0                   0

  Columns 46 through 50

                   0                   0                   0                   0                   0

  Columns 51 through 55

                   0                   0                   0                   0                   0

  Columns 56 through 60

                   0                   0                   0                   0                   0

  Column 61

                   0


outer_code_BER =

  Columns 1 through 5

   0.085397029963518   0.081516509511760                   0                   0                   0

  Columns 6 through 10

                   0                   0                   0                   0                   0

  Columns 11 through 15

                   0                   0                   0                   0                   0

  Columns 16 through 20

                   0                   0                   0                   0                   0

  Columns 21 through 25

                   0                   0                   0                   0                   0

  Columns 26 through 30

                   0                   0                   0                   0                   0

  Columns 31 through 35

                   0                   0                   0                   0                   0

  Columns 36 through 40

                   0                   0                   0                   0                   0

  Columns 41 through 45

                   0                   0                   0                   0                   0

  Columns 46 through 50

                   0                   0                   0                   0                   0

  Columns 51 through 55

                   0                   0                   0                   0                   0

  Columns 56 through 60

                   0                   0                   0                   0                   0

  Column 61

                   0


inner_code_BER =

  Columns 1 through 5

   0.085397029963518   0.081516509511755   0.077666073748937                   0                   0

  Columns 6 through 10

                   0                   0                   0                   0                   0

  Columns 11 through 15

                   0                   0                   0                   0                   0

  Columns 16 through 20

                   0                   0                   0                   0                   0

  Columns 21 through 25

                   0                   0                   0                   0                   0

  Columns 26 through 30

                   0                   0                   0                   0                   0

  Columns 31 through 35

                   0                   0                   0                   0                   0

  Columns 36 through 40

                   0                   0                   0                   0                   0

  Columns 41 through 45

                   0                   0                   0                   0                   0

  Columns 46 through 50

                   0                   0                   0                   0                   0

  Columns 51 through 55

                   0                   0                   0                   0                   0

  Columns 56 through 60

                   0                   0                   0                   0                   0

  Column 61

                   0


outer_code_BER =

  Columns 1 through 5

   0.085397029963518   0.081516509511760   0.077666073748954                   0                   0

  Columns 6 through 10

                   0                   0                   0                   0                   0

  Columns 11 through 15

                   0                   0                   0                   0                   0

  Columns 16 through 20

                   0                   0                   0                   0                   0

  Columns 21 through 25

                   0                   0                   0                   0                   0

  Columns 26 through 30

                   0                   0                   0                   0                   0

  Columns 31 through 35

                   0                   0                   0                   0                   0

  Columns 36 through 40

                   0                   0                   0                   0                   0

  Columns 41 through 45

                   0                   0                   0                   0                   0

  Columns 46 through 50

                   0                   0                   0                   0                   0

  Columns 51 through 55

                   0                   0                   0                   0                   0

  Columns 56 through 60

                   0                   0                   0                   0                   0

  Column 61

                   0


inner_code_BER =

  Columns 1 through 5

   0.085397029963518   0.081516509511755   0.077666073748937   0.073851383502928                   0

  Columns 6 through 10

                   0                   0                   0                   0                   0

  Columns 11 through 15

                   0                   0                   0                   0                   0

  Columns 16 through 20

                   0                   0                   0                   0                   0

  Columns 21 through 25

                   0                   0                   0                   0                   0

  Columns 26 through 30

                   0                   0                   0                   0                   0

  Columns 31 through 35

                   0                   0                   0                   0                   0

  Columns 36 through 40

                   0                   0                   0                   0                   0

  Columns 41 through 45

                   0                   0                   0                   0                   0

  Columns 46 through 50

                   0                   0                   0                   0                   0

  Columns 51 through 55

                   0                   0                   0                   0                   0

  Columns 56 through 60

                   0                   0                   0                   0                   0

  Column 61

                   0


outer_code_BER =

  Columns 1 through 5

   0.085397029963518   0.081516509511760   0.077666073748954   0.073851383502990                   0

  Columns 6 through 10

                   0                   0                   0                   0                   0

  Columns 11 through 15

                   0                   0                   0                   0                   0

  Columns 16 through 20

                   0                   0                   0                   0                   0

  Columns 21 through 25

                   0                   0                   0                   0                   0

  Columns 26 through 30

                   0                   0                   0                   0                   0

  Columns 31 through 35

                   0                   0                   0                   0                   0

  Columns 36 through 40

                   0                   0                   0                   0                   0

  Columns 41 through 45

                   0                   0                   0                   0                   0

  Columns 46 through 50

                   0                   0                   0                   0                   0

  Columns 51 through 55

                   0                   0                   0                   0                   0

  Columns 56 through 60

                   0                   0                   0                   0                   0

  Column 61

                   0


inner_code_BER =

  Columns 1 through 5

   0.085397029963518   0.081516509511755   0.077666073748937   0.073851383502928   0.070078629585463

  Columns 6 through 10

                   0                   0                   0                   0                   0

  Columns 11 through 15

                   0                   0                   0                   0                   0

  Columns 16 through 20

                   0                   0                   0                   0                   0

  Columns 21 through 25

                   0                   0                   0                   0                   0

  Columns 26 through 30

                   0                   0                   0                   0                   0

  Columns 31 through 35

                   0                   0                   0                   0                   0

  Columns 36 through 40

                   0                   0                   0                   0                   0

  Columns 41 through 45

                   0                   0                   0                   0                   0

  Columns 46 through 50

                   0                   0                   0                   0                   0

  Columns 51 through 55

                   0                   0                   0                   0                   0

  Columns 56 through 60

                   0                   0                   0                   0                   0

  Column 61

                   0


outer_code_BER =

  Columns 1 through 5

   0.085397029963518   0.081516509511760   0.077666073748954   0.073851383502990   0.070078629585699

  Columns 6 through 10

                   0                   0                   0                   0                   0

  Columns 11 through 15

                   0                   0                   0                   0                   0

  Columns 16 through 20

                   0                   0                   0                   0                   0

  Columns 21 through 25

                   0                   0                   0                   0                   0

  Columns 26 through 30

                   0                   0                   0                   0                   0

  Columns 31 through 35

                   0                   0                   0                   0                   0

  Columns 36 through 40

                   0                   0                   0                   0                   0

  Columns 41 through 45

                   0                   0                   0                   0                   0

  Columns 46 through 50

                   0                   0                   0                   0                   0

  Columns 51 through 55

                   0                   0                   0                   0                   0

  Columns 56 through 60

                   0                   0                   0                   0                   0

  Column 61

                   0


inner_code_BER =

  Columns 1 through 5

   0.085397029963518   0.081516509511755   0.077666073748937   0.073851383502928   0.070078629585463

  Columns 6 through 10

   0.066354498013175                   0                   0                   0                   0

  Columns 11 through 15

                   0                   0                   0                   0                   0

  Columns 16 through 20

                   0                   0                   0                   0                   0

  Columns 21 through 25

                   0                   0                   0                   0                   0

  Columns 26 through 30

                   0                   0                   0                   0                   0

  Columns 31 through 35

                   0                   0                   0                   0                   0

  Columns 36 through 40

                   0                   0                   0                   0                   0

  Columns 41 through 45

                   0                   0                   0                   0                   0

  Columns 46 through 50

                   0                   0                   0                   0                   0

  Columns 51 through 55

                   0                   0                   0                   0                   0

  Columns 56 through 60

                   0                   0                   0                   0                   0

  Column 61

                   0


outer_code_BER =

  Columns 1 through 5

   0.085397029963518   0.081516509511760   0.077666073748954   0.073851383502990   0.070078629585699

  Columns 6 through 10

   0.066354498014021                   0                   0                   0                   0

  Columns 11 through 15

                   0                   0                   0                   0                   0

  Columns 16 through 20

                   0                   0                   0                   0                   0

  Columns 21 through 25

                   0                   0                   0                   0                   0

  Columns 26 through 30

                   0                   0                   0                   0                   0

  Columns 31 through 35

                   0                   0                   0                   0                   0

  Columns 36 through 40

                   0                   0                   0                   0                   0

  Columns 41 through 45

                   0                   0                   0                   0                   0

  Columns 46 through 50

                   0                   0                   0                   0                   0

  Columns 51 through 55

                   0                   0                   0                   0                   0

  Columns 56 through 60

                   0                   0                   0                   0                   0

  Column 61

                   0


inner_code_BER =

  Columns 1 through 5

   0.085397029963518   0.081516509511755   0.077666073748937   0.073851383502928   0.070078629585463

  Columns 6 through 10

   0.066354498013175   0.062686082308447                   0                   0                   0

  Columns 11 through 15

                   0                   0                   0                   0                   0

  Columns 16 through 20

                   0                   0                   0                   0                   0

  Columns 21 through 25

                   0                   0                   0                   0                   0

  Columns 26 through 30

                   0                   0                   0                   0                   0

  Columns 31 through 35

                   0                   0                   0                   0                   0

  Columns 36 through 40

                   0                   0                   0                   0                   0

  Columns 41 through 45

                   0                   0                   0                   0                   0

  Columns 46 through 50

                   0                   0                   0                   0                   0

  Columns 51 through 55

                   0                   0                   0                   0                   0

  Columns 56 through 60

                   0                   0                   0                   0                   0

  Column 61

                   0


outer_code_BER =

  Columns 1 through 5

   0.085397029963518   0.081516509511760   0.077666073748954   0.073851383502990   0.070078629585699

  Columns 6 through 10

   0.066354498014021   0.062686082311361                   0                   0                   0

  Columns 11 through 15

                   0                   0                   0                   0                   0

  Columns 16 through 20

                   0                   0                   0                   0                   0

  Columns 21 through 25

                   0                   0                   0                   0                   0

  Columns 26 through 30

                   0                   0                   0                   0                   0

  Columns 31 through 35

                   0                   0                   0                   0                   0

  Columns 36 through 40

                   0                   0                   0                   0                   0

  Columns 41 through 45

                   0                   0                   0                   0                   0

  Columns 46 through 50

                   0                   0                   0                   0                   0

  Columns 51 through 55

                   0                   0                   0                   0                   0

  Columns 56 through 60

                   0                   0                   0                   0                   0

  Column 61

                   0


inner_code_BER =

  Columns 1 through 5

   0.085397029963518   0.081516509511755   0.077666073748937   0.073851383502928   0.070078629585463

  Columns 6 through 10

   0.066354498013175   0.062686082308447   0.059080731345821                   0                   0

  Columns 11 through 15

                   0                   0                   0                   0                   0

  Columns 16 through 20

                   0                   0                   0                   0                   0

  Columns 21 through 25

                   0                   0                   0                   0                   0

  Columns 26 through 30

                   0                   0                   0                   0                   0

  Columns 31 through 35

                   0                   0                   0                   0                   0

  Columns 36 through 40

                   0                   0                   0                   0                   0

  Columns 41 through 45

                   0                   0                   0                   0                   0

  Columns 46 through 50

                   0                   0                   0                   0                   0

  Columns 51 through 55

                   0                   0                   0                   0                   0

  Columns 56 through 60

                   0                   0                   0                   0                   0

  Column 61

                   0


outer_code_BER =

  Columns 1 through 5

   0.085397029963518   0.081516509511760   0.077666073748954   0.073851383502990   0.070078629585699

  Columns 6 through 10

   0.066354498014021   0.062686082311361   0.059080731355427                   0                   0

  Columns 11 through 15

                   0                   0                   0                   0                   0

  Columns 16 through 20

                   0                   0                   0                   0                   0

  Columns 21 through 25

                   0                   0                   0                   0                   0

  Columns 26 through 30

                   0                   0                   0                   0                   0

  Columns 31 through 35

                   0                   0                   0                   0                   0

  Columns 36 through 40

                   0                   0                   0                   0                   0

  Columns 41 through 45

                   0                   0                   0                   0                   0

  Columns 46 through 50

                   0                   0                   0                   0                   0

  Columns 51 through 55

                   0                   0                   0                   0                   0

  Columns 56 through 60

                   0                   0                   0                   0                   0

  Column 61

                   0


inner_code_BER =

  Columns 1 through 5

   0.085397029963518   0.081516509511755   0.077666073748937   0.073851383502928   0.070078629585463

  Columns 6 through 10

   0.066354498013175   0.062686082308447   0.059080731345821   0.055545827244992                   0

  Columns 11 through 15

                   0                   0                   0                   0                   0

  Columns 16 through 20

                   0                   0                   0                   0                   0

  Columns 21 through 25

                   0                   0                   0                   0                   0

  Columns 26 through 30

                   0                   0                   0                   0                   0

  Columns 31 through 35

                   0                   0                   0                   0                   0

  Columns 36 through 40

                   0                   0                   0                   0                   0

  Columns 41 through 45

                   0                   0                   0                   0                   0

  Columns 46 through 50

                   0                   0                   0                   0                   0

  Columns 51 through 55

                   0                   0                   0                   0                   0

  Columns 56 through 60

                   0                   0                   0                   0                   0

  Column 61

                   0


outer_code_BER =

  Columns 1 through 5

   0.085397029963518   0.081516509511760   0.077666073748954   0.073851383502990   0.070078629585699

  Columns 6 through 10

   0.066354498014021   0.062686082311361   0.059080731355427   0.055545827275249                   0

  Columns 11 through 15

                   0                   0                   0                   0                   0

  Columns 16 through 20

                   0                   0                   0                   0                   0

  Columns 21 through 25

                   0                   0                   0                   0                   0

  Columns 26 through 30

                   0                   0                   0                   0                   0

  Columns 31 through 35

                   0                   0                   0                   0                   0

  Columns 36 through 40

                   0                   0                   0                   0                   0

  Columns 41 through 45

                   0                   0                   0                   0                   0

  Columns 46 through 50

                   0                   0                   0                   0                   0

  Columns 51 through 55

                   0                   0                   0                   0                   0

  Columns 56 through 60

                   0                   0                   0                   0                   0

  Column 61

                   0


inner_code_BER =

  Columns 1 through 5

   0.085397029963518   0.081516509511755   0.077666073748937   0.073851383502928   0.070078629585463

  Columns 6 through 10

   0.066354498013175   0.062686082308447   0.059080731345821   0.055545827244992   0.052088498064065

  Columns 11 through 15

                   0                   0                   0                   0                   0

  Columns 16 through 20

                   0                   0                   0                   0                   0

  Columns 21 through 25

                   0                   0                   0                   0                   0

  Columns 26 through 30

                   0                   0                   0                   0                   0

  Columns 31 through 35

                   0                   0                   0                   0                   0

  Columns 36 through 40

                   0                   0                   0                   0                   0

  Columns 41 through 45

                   0                   0                   0                   0                   0

  Columns 46 through 50

                   0                   0                   0                   0                   0

  Columns 51 through 55

                   0                   0                   0                   0                   0

  Columns 56 through 60

                   0                   0                   0                   0                   0

  Column 61

                   0


outer_code_BER =

  Columns 1 through 5

   0.085397029963518   0.081516509511760   0.077666073748954   0.073851383502990   0.070078629585699

  Columns 6 through 10

   0.066354498014021   0.062686082311361   0.059080731355427   0.055545827275249   0.052088498155023

  Columns 11 through 15

                   0                   0                   0                   0                   0

  Columns 16 through 20

                   0                   0                   0                   0                   0

  Columns 21 through 25

                   0                   0                   0                   0                   0

  Columns 26 through 30

                   0                   0                   0                   0                   0

  Columns 31 through 35

                   0                   0                   0                   0                   0

  Columns 36 through 40

                   0                   0                   0                   0                   0

  Columns 41 through 45

                   0                   0                   0                   0                   0

  Columns 46 through 50

                   0                   0                   0                   0                   0

  Columns 51 through 55

                   0                   0                   0                   0                   0

  Columns 56 through 60

                   0                   0                   0                   0                   0

  Column 61

                   0


inner_code_BER =

  Columns 1 through 5

   0.085397029963518   0.081516509511755   0.077666073748937   0.073851383502928   0.070078629585463

  Columns 6 through 10

   0.066354498013175   0.062686082308447   0.059080731345821   0.055545827244992   0.052088498064065

  Columns 11 through 15

   0.048715283509483                   0                   0                   0                   0

  Columns 16 through 20

                   0                   0                   0                   0                   0

  Columns 21 through 25

                   0                   0                   0                   0                   0

  Columns 26 through 30

                   0                   0                   0                   0                   0

  Columns 31 through 35

                   0                   0                   0                   0                   0

  Columns 36 through 40

                   0                   0                   0                   0                   0

  Columns 41 through 45

                   0                   0                   0                   0                   0

  Columns 46 through 50

                   0                   0                   0                   0                   0

  Columns 51 through 55

                   0                   0                   0                   0                   0

  Columns 56 through 60

                   0                   0                   0                   0                   0

  Column 61

                   0


outer_code_BER =

  Columns 1 through 5

   0.085397029963518   0.081516509511760   0.077666073748954   0.073851383502990   0.070078629585699

  Columns 6 through 10

   0.066354498014021   0.062686082311361   0.059080731355427   0.055545827275249   0.052088498155023

  Columns 11 through 15

   0.048715283770194                   0                   0                   0                   0

  Columns 16 through 20

                   0                   0                   0                   0                   0

  Columns 21 through 25

                   0                   0                   0                   0                   0

  Columns 26 through 30

                   0                   0                   0                   0                   0

  Columns 31 through 35

                   0                   0                   0                   0                   0

  Columns 36 through 40

                   0                   0                   0                   0                   0

  Columns 41 through 45

                   0                   0                   0                   0                   0

  Columns 46 through 50

                   0                   0                   0                   0                   0

  Columns 51 through 55

                   0                   0                   0                   0                   0

  Columns 56 through 60

                   0                   0                   0                   0                   0

  Column 61

                   0


inner_code_BER =

  Columns 1 through 5

   0.085397029963518   0.081516509511755   0.077666073748937   0.073851383502928   0.070078629585463

  Columns 6 through 10

   0.066354498013175   0.062686082308447   0.059080731345821   0.055545827244992   0.052088498064065

  Columns 11 through 15

   0.048715283509483   0.045431785870327                   0                   0                   0

  Columns 16 through 20

                   0                   0                   0                   0                   0

  Columns 21 through 25

                   0                   0                   0                   0                   0

  Columns 26 through 30

                   0                   0                   0                   0                   0

  Columns 31 through 35

                   0                   0                   0                   0                   0

  Columns 36 through 40

                   0                   0                   0                   0                   0

  Columns 41 through 45

                   0                   0                   0                   0                   0

  Columns 46 through 50

                   0                   0                   0                   0                   0

  Columns 51 through 55

                   0                   0                   0                   0                   0

  Columns 56 through 60

                   0                   0                   0                   0                   0

  Column 61

                   0


outer_code_BER =

  Columns 1 through 5

   0.085397029963518   0.081516509511760   0.077666073748954   0.073851383502990   0.070078629585699

  Columns 6 through 10

   0.066354498014021   0.062686082311361   0.059080731355427   0.055545827275249   0.052088498155023

  Columns 11 through 15

   0.048715283770194   0.045431786582278                   0                   0                   0

  Columns 16 through 20

                   0                   0                   0                   0                   0

  Columns 21 through 25

                   0                   0                   0                   0                   0

  Columns 26 through 30

                   0                   0                   0                   0                   0

  Columns 31 through 35

                   0                   0                   0                   0                   0

  Columns 36 through 40

                   0                   0                   0                   0                   0

  Columns 41 through 45

                   0                   0                   0                   0                   0

  Columns 46 through 50

                   0                   0                   0                   0                   0

  Columns 51 through 55

                   0                   0                   0                   0                   0

  Columns 56 through 60

                   0                   0                   0                   0                   0

  Column 61

                   0


inner_code_BER =

  Columns 1 through 5

   0.085397029963518   0.081516509511755   0.077666073748937   0.073851383502928   0.070078629585463

  Columns 6 through 10

   0.066354498013175   0.062686082308447   0.059080731345821   0.055545827244992   0.052088498064065

  Columns 11 through 15

   0.048715283509483   0.045431785870327   0.042242349098492                   0                   0

  Columns 16 through 20

                   0                   0                   0                   0                   0

  Columns 21 through 25

                   0                   0                   0                   0                   0

  Columns 26 through 30

                   0                   0                   0                   0                   0

  Columns 31 through 35

                   0                   0                   0                   0                   0

  Columns 36 through 40

                   0                   0                   0                   0                   0

  Columns 41 through 45

                   0                   0                   0                   0                   0

  Columns 46 through 50

                   0                   0                   0                   0                   0

  Columns 51 through 55

                   0                   0                   0                   0                   0

  Columns 56 through 60

                   0                   0                   0                   0                   0

  Column 61

                   0


outer_code_BER =

  Columns 1 through 5

   0.085397029963518   0.081516509511760   0.077666073748954   0.073851383502990   0.070078629585699

  Columns 6 through 10

   0.066354498014021   0.062686082311361   0.059080731355427   0.055545827275249   0.052088498155023

  Columns 11 through 15

   0.048715283770194   0.045431786582278   0.042242350949778                   0                   0

  Columns 16 through 20

                   0                   0                   0                   0                   0

  Columns 21 through 25

                   0                   0                   0                   0                   0

  Columns 26 through 30

                   0                   0                   0                   0                   0

  Columns 31 through 35

                   0                   0                   0                   0                   0

  Columns 36 through 40

                   0                   0                   0                   0                   0

  Columns 41 through 45

                   0                   0                   0                   0                   0

  Columns 46 through 50

                   0                   0                   0                   0                   0

  Columns 51 through 55

                   0                   0                   0                   0                   0

  Columns 56 through 60

                   0                   0                   0                   0                   0

  Column 61

                   0


inner_code_BER =

  Columns 1 through 5

   0.085397029963518   0.081516509511755   0.077666073748937   0.073851383502928   0.070078629585463

  Columns 6 through 10

   0.066354498013175   0.062686082308447   0.059080731345821   0.055545827244992   0.052088498064065

  Columns 11 through 15

   0.048715283509483   0.045431785870327   0.042242349098492   0.039149813003319                   0

  Columns 16 through 20

                   0                   0                   0                   0                   0

  Columns 21 through 25

                   0                   0                   0                   0                   0

  Columns 26 through 30

                   0                   0                   0                   0                   0

  Columns 31 through 35

                   0                   0                   0                   0                   0

  Columns 36 through 40

                   0                   0                   0                   0                   0

  Columns 41 through 45

                   0                   0                   0                   0                   0

  Columns 46 through 50

                   0                   0                   0                   0                   0

  Columns 51 through 55

                   0                   0                   0                   0                   0

  Columns 56 through 60

                   0                   0                   0                   0                   0

  Column 61

                   0


outer_code_BER =

  Columns 1 through 5

   0.085397029963518   0.081516509511760   0.077666073748954   0.073851383502990   0.070078629585699

  Columns 6 through 10

   0.066354498014021   0.062686082311361   0.059080731355427   0.055545827275249   0.052088498155023

  Columns 11 through 15

   0.048715283770194   0.045431786582278   0.042242350949778   0.039149817585280                   0

  Columns 16 through 20

                   0                   0                   0                   0                   0

  Columns 21 through 25

                   0                   0                   0                   0                   0

  Columns 26 through 30

                   0                   0                   0                   0                   0

  Columns 31 through 35

                   0                   0                   0                   0                   0

  Columns 36 through 40

                   0                   0                   0                   0                   0

  Columns 41 through 45

                   0                   0                   0                   0                   0

  Columns 46 through 50

                   0                   0                   0                   0                   0

  Columns 51 through 55

                   0                   0                   0                   0                   0

  Columns 56 through 60

                   0                   0                   0                   0                   0

  Column 61

                   0


inner_code_BER =

  Columns 1 through 5

   0.085397029963518   0.081516509511755   0.077666073748937   0.073851383502928   0.070078629585463

  Columns 6 through 10

   0.066354498013175   0.062686082308447   0.059080731345821   0.055545827244992   0.052088498064065

  Columns 11 through 15

   0.048715283509483   0.045431785870327   0.042242349098492   0.039149813003319   0.036155385939879

  Columns 16 through 20

                   0                   0                   0                   0                   0

  Columns 21 through 25

                   0                   0                   0                   0                   0

  Columns 26 through 30

                   0                   0                   0                   0                   0

  Columns 31 through 35

                   0                   0                   0                   0                   0

  Columns 36 through 40

                   0                   0                   0                   0                   0

  Columns 41 through 45

                   0                   0                   0                   0                   0

  Columns 46 through 50

                   0                   0                   0                   0                   0

  Columns 51 through 55

                   0                   0                   0                   0                   0

  Columns 56 through 60

                   0                   0                   0                   0                   0

  Column 61

                   0


outer_code_BER =

  Columns 1 through 5

   0.085397029963518   0.081516509511760   0.077666073748954   0.073851383502990   0.070078629585699

  Columns 6 through 10

   0.066354498014021   0.062686082311361   0.059080731355427   0.055545827275249   0.052088498155023

  Columns 11 through 15

   0.048715283770194   0.045431786582278   0.042242350949778   0.039149817585280   0.036155396729176

  Columns 16 through 20

                   0                   0                   0                   0                   0

  Columns 21 through 25

                   0                   0                   0                   0                   0

  Columns 26 through 30

                   0                   0                   0                   0                   0

  Columns 31 through 35

                   0                   0                   0                   0                   0

  Columns 36 through 40

                   0                   0                   0                   0                   0

  Columns 41 through 45

                   0                   0                   0                   0                   0

  Columns 46 through 50

                   0                   0                   0                   0                   0

  Columns 51 through 55

                   0                   0                   0                   0                   0

  Columns 56 through 60

                   0                   0                   0                   0                   0

  Column 61

                   0


inner_code_BER =

  Columns 1 through 5

   0.085397029963518   0.081516509511755   0.077666073748937   0.073851383502928   0.070078629585463

  Columns 6 through 10

   0.066354498013175   0.062686082308447   0.059080731345821   0.055545827244992   0.052088498064065

  Columns 11 through 15

   0.048715283509483   0.045431785870327   0.042242349098492   0.039149813003319   0.036155385939879

  Columns 16 through 20

   0.033258671000979                   0                   0                   0                   0

  Columns 21 through 25

                   0                   0                   0                   0                   0

  Columns 26 through 30

                   0                   0                   0                   0                   0

  Columns 31 through 35

                   0                   0                   0                   0                   0

  Columns 36 through 40

                   0                   0                   0                   0                   0

  Columns 41 through 45

                   0                   0                   0                   0                   0

  Columns 46 through 50

                   0                   0                   0                   0                   0

  Columns 51 through 55

                   0                   0                   0                   0                   0

  Columns 56 through 60

                   0                   0                   0                   0                   0

  Column 61

                   0


outer_code_BER =

  Columns 1 through 5

   0.085397029963518   0.081516509511760   0.077666073748954   0.073851383502990   0.070078629585699

  Columns 6 through 10

   0.066354498014021   0.062686082311361   0.059080731355427   0.055545827275249   0.052088498155023

  Columns 11 through 15

   0.048715283770194   0.045431786582278   0.042242350949778   0.039149817585280   0.036155396729176

  Columns 16 through 20

   0.033258695152937                   0                   0                   0                   0

  Columns 21 through 25

                   0                   0                   0                   0                   0

  Columns 26 through 30

                   0                   0                   0                   0                   0

  Columns 31 through 35

                   0                   0                   0                   0                   0

  Columns 36 through 40

                   0                   0                   0                   0                   0

  Columns 41 through 45

                   0                   0                   0                   0                   0

  Columns 46 through 50

                   0                   0                   0                   0                   0

  Columns 51 through 55

                   0                   0                   0                   0                   0

  Columns 56 through 60

                   0                   0                   0                   0                   0

  Column 61

                   0


inner_code_BER =

  Columns 1 through 5

   0.085397029963518   0.081516509511755   0.077666073748937   0.073851383502928   0.070078629585463

  Columns 6 through 10

   0.066354498013175   0.062686082308447   0.059080731345821   0.055545827244992   0.052088498064065

  Columns 11 through 15

   0.048715283509483   0.045431785870327   0.042242349098492   0.039149813003319   0.036155385939879

  Columns 16 through 20

   0.033258671000979   0.030457874218112                   0                   0                   0

  Columns 21 through 25

                   0                   0                   0                   0                   0

  Columns 26 through 30

                   0                   0                   0                   0                   0

  Columns 31 through 35

                   0                   0                   0                   0                   0

  Columns 36 through 40

                   0                   0                   0                   0                   0

  Columns 41 through 45

                   0                   0                   0                   0                   0

  Columns 46 through 50

                   0                   0                   0                   0                   0

  Columns 51 through 55

                   0                   0                   0                   0                   0

  Columns 56 through 60

                   0                   0                   0                   0                   0

  Column 61

                   0


outer_code_BER =

  Columns 1 through 5

   0.085397029963518   0.081516509511760   0.077666073748954   0.073851383502990   0.070078629585699

  Columns 6 through 10

   0.066354498014021   0.062686082311361   0.059080731355427   0.055545827275249   0.052088498155023

  Columns 11 through 15

   0.048715283770194   0.045431786582278   0.042242350949778   0.039149817585280   0.036155396729176

  Columns 16 through 20

   0.033258695152937   0.030457925523071                   0                   0                   0

  Columns 21 through 25

                   0                   0                   0                   0                   0

  Columns 26 through 30

                   0                   0                   0                   0                   0

  Columns 31 through 35

                   0                   0                   0                   0                   0

  Columns 36 through 40

                   0                   0                   0                   0                   0

  Columns 41 through 45

                   0                   0                   0                   0                   0

  Columns 46 through 50

                   0                   0                   0                   0                   0

  Columns 51 through 55

                   0                   0                   0                   0                   0

  Columns 56 through 60

                   0                   0                   0                   0                   0

  Column 61

                   0


inner_code_BER =

  Columns 1 through 5

   0.085397029963518   0.081516509511755   0.077666073748937   0.073851383502928   0.070078629585463

  Columns 6 through 10

   0.066354498013175   0.062686082308447   0.059080731345821   0.055545827244992   0.052088498064065

  Columns 11 through 15

   0.048715283509483   0.045431785870327   0.042242349098492   0.039149813003319   0.036155385939879

  Columns 16 through 20

   0.033258671000979   0.030457874218112   0.027750227624111                   0                   0

  Columns 21 through 25

                   0                   0                   0                   0                   0

  Columns 26 through 30

                   0                   0                   0                   0                   0

  Columns 31 through 35

                   0                   0                   0                   0                   0

  Columns 36 through 40

                   0                   0                   0                   0                   0

  Columns 41 through 45

                   0                   0                   0                   0                   0

  Columns 46 through 50

                   0                   0                   0                   0                   0

  Columns 51 through 55

                   0                   0                   0                   0                   0

  Columns 56 through 60

                   0                   0                   0                   0                   0

  Column 61

                   0


outer_code_BER =

  Columns 1 through 5

   0.085397029963518   0.081516509511760   0.077666073748954   0.073851383502990   0.070078629585699

  Columns 6 through 10

   0.066354498014021   0.062686082311361   0.059080731355427   0.055545827275249   0.052088498155023

  Columns 11 through 15

   0.048715283770194   0.045431786582278   0.042242350949778   0.039149817585280   0.036155396729176

  Columns 16 through 20

   0.033258695152937   0.030457925523071   0.027750330632856                   0                   0

  Columns 21 through 25

                   0                   0                   0                   0                   0

  Columns 26 through 30

                   0                   0                   0                   0                   0

  Columns 31 through 35

                   0                   0                   0                   0                   0

  Columns 36 through 40

                   0                   0                   0                   0                   0

  Columns 41 through 45

                   0                   0                   0                   0                   0

  Columns 46 through 50

                   0                   0                   0                   0                   0

  Columns 51 through 55

                   0                   0                   0                   0                   0

  Columns 56 through 60

                   0                   0                   0                   0                   0

  Column 61

                   0


inner_code_BER =

  Columns 1 through 5

   0.085397029963518   0.081516509511755   0.077666073748937   0.073851383502928   0.070078629585463

  Columns 6 through 10

   0.066354498013175   0.062686082308447   0.059080731345821   0.055545827244992   0.052088498064065

  Columns 11 through 15

   0.048715283509483   0.045431785870327   0.042242349098492   0.039149813003319   0.036155385939879

  Columns 16 through 20

   0.033258671000979   0.030457874218112   0.027750227624111   0.025132684367582                   0

  Columns 21 through 25

                   0                   0                   0                   0                   0

  Columns 26 through 30

                   0                   0                   0                   0                   0

  Columns 31 through 35

                   0                   0                   0                   0                   0

  Columns 36 through 40

                   0                   0                   0                   0                   0

  Columns 41 through 45

                   0                   0                   0                   0                   0

  Columns 46 through 50

                   0                   0                   0                   0                   0

  Columns 51 through 55

                   0                   0                   0                   0                   0

  Columns 56 through 60

                   0                   0                   0                   0                   0

  Column 61

                   0


outer_code_BER =

  Columns 1 through 5

   0.085397029963518   0.081516509511760   0.077666073748954   0.073851383502990   0.070078629585699

  Columns 6 through 10

   0.066354498014021   0.062686082311361   0.059080731355427   0.055545827275249   0.052088498155023

  Columns 11 through 15

   0.048715283770194   0.045431786582278   0.042242350949778   0.039149817585280   0.036155396729176

  Columns 16 through 20

   0.033258695152937   0.030457925523071   0.027750330632856   0.025132878068968                   0

  Columns 21 through 25

                   0                   0                   0                   0                   0

  Columns 26 through 30

                   0                   0                   0                   0                   0

  Columns 31 through 35

                   0                   0                   0                   0                   0

  Columns 36 through 40

                   0                   0                   0                   0                   0

  Columns 41 through 45

                   0                   0                   0                   0                   0

  Columns 46 through 50

                   0                   0                   0                   0                   0

  Columns 51 through 55

                   0                   0                   0                   0                   0

  Columns 56 through 60

                   0                   0                   0                   0                   0

  Column 61

                   0


inner_code_BER =

  Columns 1 through 5

   0.085397029963518   0.081516509511755   0.077666073748937   0.073851383502928   0.070078629585463

  Columns 6 through 10

   0.066354498013175   0.062686082308447   0.059080731345821   0.055545827244992   0.052088498064065

  Columns 11 through 15

   0.048715283509483   0.045431785870327   0.042242349098492   0.039149813003319   0.036155385939879

  Columns 16 through 20

   0.033258671000979   0.030457874218112   0.027750227624111   0.025132684367582   0.022602993058709

  Columns 21 through 25

                   0                   0                   0                   0                   0

  Columns 26 through 30

                   0                   0                   0                   0                   0

  Columns 31 through 35

                   0                   0                   0                   0                   0

  Columns 36 through 40

                   0                   0                   0                   0                   0

  Columns 41 through 45

                   0                   0                   0                   0                   0

  Columns 46 through 50

                   0                   0                   0                   0                   0

  Columns 51 through 55

                   0                   0                   0                   0                   0

  Columns 56 through 60

                   0                   0                   0                   0                   0

  Column 61

                   0


outer_code_BER =

  Columns 1 through 5

   0.085397029963518   0.081516509511760   0.077666073748954   0.073851383502990   0.070078629585699

  Columns 6 through 10

   0.066354498014021   0.062686082311361   0.059080731355427   0.055545827275249   0.052088498155023

  Columns 11 through 15

   0.048715283770194   0.045431786582278   0.042242350949778   0.039149817585280   0.036155396729176

  Columns 16 through 20

   0.033258695152937   0.030457925523071   0.027750330632856   0.025132878068968   0.022603326835386

  Columns 21 through 25

                   0                   0                   0                   0                   0

  Columns 26 through 30

                   0                   0                   0                   0                   0

  Columns 31 through 35

                   0                   0                   0                   0                   0

  Columns 36 through 40

                   0                   0                   0                   0                   0

  Columns 41 through 45

                   0                   0                   0                   0                   0

  Columns 46 through 50

                   0                   0                   0                   0                   0

  Columns 51 through 55

                   0                   0                   0                   0                   0

  Columns 56 through 60

                   0                   0                   0                   0                   0

  Column 61

                   0


inner_code_BER =

  Columns 1 through 5

   0.085397029963518   0.081516509511755   0.077666073748937   0.073851383502928   0.070078629585463

  Columns 6 through 10

   0.066354498013175   0.062686082308447   0.059080731345821   0.055545827244992   0.052088498064065

  Columns 11 through 15

   0.048715283509483   0.045431785870327   0.042242349098492   0.039149813003319   0.036155385939879

  Columns 16 through 20

   0.033258671000979   0.030457874218112   0.027750227624111   0.025132684367582   0.022602993058709

  Columns 21 through 25

   0.020161325337567                   0                   0                   0                   0

  Columns 26 through 30

                   0                   0                   0                   0                   0

  Columns 31 through 35

                   0                   0                   0                   0                   0

  Columns 36 through 40

                   0                   0                   0                   0                   0

  Columns 41 through 45

                   0                   0                   0                   0                   0

  Columns 46 through 50

                   0                   0                   0                   0                   0

  Columns 51 through 55

                   0                   0                   0                   0                   0

  Columns 56 through 60

                   0                   0                   0                   0                   0

  Column 61

                   0


outer_code_BER =

  Columns 1 through 5

   0.085397029963518   0.081516509511760   0.077666073748954   0.073851383502990   0.070078629585699

  Columns 6 through 10

   0.066354498014021   0.062686082311361   0.059080731355427   0.055545827275249   0.052088498155023

  Columns 11 through 15

   0.048715283770194   0.045431786582278   0.042242350949778   0.039149817585280   0.036155396729176

  Columns 16 through 20

   0.033258695152937   0.030457925523071   0.027750330632856   0.025132878068968   0.022603326835386

  Columns 21 through 25

   0.020161822098975                   0                   0                   0                   0

  Columns 26 through 30

                   0                   0                   0                   0                   0

  Columns 31 through 35

                   0                   0                   0                   0                   0

  Columns 36 through 40

                   0                   0                   0                   0                   0

  Columns 41 through 45

                   0                   0                   0                   0                   0

  Columns 46 through 50

                   0                   0                   0                   0                   0

  Columns 51 through 55

                   0                   0                   0                   0                   0

  Columns 56 through 60

                   0                   0                   0                   0                   0

  Column 61

                   0


inner_code_BER =

  Columns 1 through 5

   0.085397029963518   0.081516509511755   0.077666073748937   0.073851383502928   0.070078629585463

  Columns 6 through 10

   0.066354498013175   0.062686082308447   0.059080731345821   0.055545827244992   0.052088498064065

  Columns 11 through 15

   0.048715283509483   0.045431785870327   0.042242349098492   0.039149813003319   0.036155385939879

  Columns 16 through 20

   0.033258671000979   0.030457874218112   0.027750227624111   0.025132684367582   0.022602993058709

  Columns 21 through 25

   0.020161325337567   0.017812655048366                   0                   0                   0

  Columns 26 through 30

                   0                   0                   0                   0                   0

  Columns 31 through 35

                   0                   0                   0                   0                   0

  Columns 36 through 40

                   0                   0                   0                   0                   0

  Columns 41 through 45

                   0                   0                   0                   0                   0

  Columns 46 through 50

                   0                   0                   0                   0                   0

  Columns 51 through 55

                   0                   0                   0                   0                   0

  Columns 56 through 60

                   0                   0                   0                   0                   0

  Column 61

                   0


outer_code_BER =

  Columns 1 through 5

   0.085397029963518   0.081516509511760   0.077666073748954   0.073851383502990   0.070078629585699

  Columns 6 through 10

   0.066354498014021   0.062686082311361   0.059080731355427   0.055545827275249   0.052088498155023

  Columns 11 through 15

   0.048715283770194   0.045431786582278   0.042242350949778   0.039149817585280   0.036155396729176

  Columns 16 through 20

   0.033258695152937   0.030457925523071   0.027750330632856   0.025132878068968   0.022603326835386

  Columns 21 through 25

   0.020161822098975   0.017813165018055                   0                   0                   0

  Columns 26 through 30

                   0                   0                   0                   0                   0

  Columns 31 through 35

                   0                   0                   0                   0                   0

  Columns 36 through 40

                   0                   0                   0                   0                   0

  Columns 41 through 45

                   0                   0                   0                   0                   0

  Columns 46 through 50

                   0                   0                   0                   0                   0

  Columns 51 through 55

                   0                   0                   0                   0                   0

  Columns 56 through 60

                   0                   0                   0                   0                   0

  Column 61

                   0


inner_code_BER =

  Columns 1 through 5

   0.085397029963518   0.081516509511755   0.077666073748937   0.073851383502928   0.070078629585463

  Columns 6 through 10

   0.066354498013175   0.062686082308447   0.059080731345821   0.055545827244992   0.052088498064065

  Columns 11 through 15

   0.048715283509483   0.045431785870327   0.042242349098492   0.039149813003319   0.036155385939879

  Columns 16 through 20

   0.033258671000979   0.030457874218112   0.027750227624111   0.025132684367582   0.022602993058709

  Columns 21 through 25

   0.020161325337567   0.017812655048366   0.015569872086364                   0                   0

  Columns 26 through 30

                   0                   0                   0                   0                   0

  Columns 31 through 35

                   0                   0                   0                   0                   0

  Columns 36 through 40

                   0                   0                   0                   0                   0

  Columns 41 through 45

                   0                   0                   0                   0                   0

  Columns 46 through 50

                   0                   0                   0                   0                   0

  Columns 51 through 55

                   0                   0                   0                   0                   0

  Columns 56 through 60

                   0                   0                   0                   0                   0

  Column 61

                   0


outer_code_BER =

  Columns 1 through 5

   0.085397029963518   0.081516509511760   0.077666073748954   0.073851383502990   0.070078629585699

  Columns 6 through 10

   0.066354498014021   0.062686082311361   0.059080731355427   0.055545827275249   0.052088498155023

  Columns 11 through 15

   0.048715283770194   0.045431786582278   0.042242350949778   0.039149817585280   0.036155396729176

  Columns 16 through 20

   0.033258695152937   0.030457925523071   0.027750330632856   0.025132878068968   0.022603326835386

  Columns 21 through 25

   0.020161822098975   0.017813165018055   0.015569613466296                   0                   0

  Columns 26 through 30

                   0                   0                   0                   0                   0

  Columns 31 through 35

                   0                   0                   0                   0                   0

  Columns 36 through 40

                   0                   0                   0                   0                   0

  Columns 41 through 45

                   0                   0                   0                   0                   0

  Columns 46 through 50

                   0                   0                   0                   0                   0

  Columns 51 through 55

                   0                   0                   0                   0                   0

  Columns 56 through 60

                   0                   0                   0                   0                   0

  Column 61

                   0


inner_code_BER =

  Columns 1 through 5

   0.085397029963518   0.081516509511755   0.077666073748937   0.073851383502928   0.070078629585463

  Columns 6 through 10

   0.066354498013175   0.062686082308447   0.059080731345821   0.055545827244992   0.052088498064065

  Columns 11 through 15

   0.048715283509483   0.045431785870327   0.042242349098492   0.039149813003319   0.036155385939879

  Columns 16 through 20

   0.033258671000979   0.030457874218112   0.027750227624111   0.025132684367582   0.022602993058709

  Columns 21 through 25

   0.020161325337567   0.017812655048366   0.015569872086364   0.013456730899238                   0

  Columns 26 through 30

                   0                   0                   0                   0                   0

  Columns 31 through 35

                   0                   0                   0                   0                   0

  Columns 36 through 40

                   0                   0                   0                   0                   0

  Columns 41 through 45

                   0                   0                   0                   0                   0

  Columns 46 through 50

                   0                   0                   0                   0                   0

  Columns 51 through 55

                   0                   0                   0                   0                   0

  Columns 56 through 60

                   0                   0                   0                   0                   0

  Column 61

                   0


outer_code_BER =

  Columns 1 through 5

   0.085397029963518   0.081516509511760   0.077666073748954   0.073851383502990   0.070078629585699

  Columns 6 through 10

   0.066354498014021   0.062686082311361   0.059080731355427   0.055545827275249   0.052088498155023

  Columns 11 through 15

   0.048715283770194   0.045431786582278   0.042242350949778   0.039149817585280   0.036155396729176

  Columns 16 through 20

   0.033258695152937   0.030457925523071   0.027750330632856   0.025132878068968   0.022603326835386

  Columns 21 through 25

   0.020161822098975   0.017813165018055   0.015569613466296   0.013453084093022                   0

  Columns 26 through 30

                   0                   0                   0                   0                   0

  Columns 31 through 35

                   0                   0                   0                   0                   0

  Columns 36 through 40

                   0                   0                   0                   0                   0

  Columns 41 through 45

                   0                   0                   0                   0                   0

  Columns 46 through 50

                   0                   0                   0                   0                   0

  Columns 51 through 55

                   0                   0                   0                   0                   0

  Columns 56 through 60

                   0                   0                   0                   0                   0

  Column 61

                   0


inner_code_BER =

  Columns 1 through 5

   0.085397029963518   0.081516509511755   0.077666073748937   0.073851383502928   0.070078629585463

  Columns 6 through 10

   0.066354498013175   0.062686082308447   0.059080731345821   0.055545827244992   0.052088498064065

  Columns 11 through 15

   0.048715283509483   0.045431785870327   0.042242349098492   0.039149813003319   0.036155385939879

  Columns 16 through 20

   0.033258671000979   0.030457874218112   0.027750227624111   0.025132684367582   0.022602993058709

  Columns 21 through 25

   0.020161325337567   0.017812655048366   0.015569872086364   0.013456730899238   0.011507877720732

  Columns 26 through 30

                   0                   0                   0                   0                   0

  Columns 31 through 35

                   0                   0                   0                   0                   0

  Columns 36 through 40

                   0                   0                   0                   0                   0

  Columns 41 through 45

                   0                   0                   0                   0                   0

  Columns 46 through 50

                   0                   0                   0                   0                   0

  Columns 51 through 55

                   0                   0                   0                   0                   0

  Columns 56 through 60

                   0                   0                   0                   0                   0

  Column 61

                   0


outer_code_BER =

  Columns 1 through 5

   0.085397029963518   0.081516509511760   0.077666073748954   0.073851383502990   0.070078629585699

  Columns 6 through 10

   0.066354498014021   0.062686082311361   0.059080731355427   0.055545827275249   0.052088498155023

  Columns 11 through 15

   0.048715283770194   0.045431786582278   0.042242350949778   0.039149817585280   0.036155396729176

  Columns 16 through 20

   0.033258695152937   0.030457925523071   0.027750330632856   0.025132878068968   0.022603326835386

  Columns 21 through 25

   0.020161822098975   0.017813165018055   0.015569613466296   0.013453084093022   0.011493847329783

  Columns 26 through 30

                   0                   0                   0                   0                   0

  Columns 31 through 35

                   0                   0                   0                   0                   0

  Columns 36 through 40

                   0                   0                   0                   0                   0

  Columns 41 through 45

                   0                   0                   0                   0                   0

  Columns 46 through 50

                   0                   0                   0                   0                   0

  Columns 51 through 55

                   0                   0                   0                   0                   0

  Columns 56 through 60

                   0                   0                   0                   0                   0

  Column 61

                   0


inner_code_BER =

  Columns 1 through 5

   0.085397029963518   0.081516509511755   0.077666073748937   0.073851383502928   0.070078629585463

  Columns 6 through 10

   0.066354498013175   0.062686082308447   0.059080731345821   0.055545827244992   0.052088498064065

  Columns 11 through 15

   0.048715283509483   0.045431785870327   0.042242349098492   0.039149813003319   0.036155385939879

  Columns 16 through 20

   0.033258671000979   0.030457874218112   0.027750227624111   0.025132684367582   0.022602993058709

  Columns 21 through 25

   0.020161325337567   0.017812655048366   0.015569872086364   0.013456730899238   0.011507877720732

  Columns 26 through 30

   0.009761919145368                   0                   0                   0                   0

  Columns 31 through 35

                   0                   0                   0                   0                   0

  Columns 36 through 40

                   0                   0                   0                   0                   0

  Columns 41 through 45

                   0                   0                   0                   0                   0

  Columns 46 through 50

                   0                   0                   0                   0                   0

  Columns 51 through 55

                   0                   0                   0                   0                   0

  Columns 56 through 60

                   0                   0                   0                   0                   0

  Column 61

                   0


outer_code_BER =

  Columns 1 through 5

   0.085397029963518   0.081516509511760   0.077666073748954   0.073851383502990   0.070078629585699

  Columns 6 through 10

   0.066354498014021   0.062686082311361   0.059080731355427   0.055545827275249   0.052088498155023

  Columns 11 through 15

   0.048715283770194   0.045431786582278   0.042242350949778   0.039149817585280   0.036155396729176

  Columns 16 through 20

   0.033258695152937   0.030457925523071   0.027750330632856   0.025132878068968   0.022603326835386

  Columns 21 through 25

   0.020161822098975   0.017813165018055   0.015569613466296   0.013453084093022   0.011493847329783

  Columns 26 through 30

   0.009722206259859                   0                   0                   0                   0

  Columns 31 through 35

                   0                   0                   0                   0                   0

  Columns 36 through 40

                   0                   0                   0                   0                   0

  Columns 41 through 45

                   0                   0                   0                   0                   0

  Columns 46 through 50

                   0                   0                   0                   0                   0

  Columns 51 through 55

                   0                   0                   0                   0                   0

  Columns 56 through 60

                   0                   0                   0                   0                   0

  Column 61

                   0


inner_code_BER =

  Columns 1 through 5

   0.085397029963518   0.081516509511755   0.077666073748937   0.073851383502928   0.070078629585463

  Columns 6 through 10

   0.066354498013175   0.062686082308447   0.059080731345821   0.055545827244992   0.052088498064065

  Columns 11 through 15

   0.048715283509483   0.045431785870327   0.042242349098492   0.039149813003319   0.036155385939879

  Columns 16 through 20

   0.033258671000979   0.030457874218112   0.027750227624111   0.025132684367582   0.022602993058709

  Columns 21 through 25

   0.020161325337567   0.017812655048366   0.015569872086364   0.013456730899238   0.011507877720732

  Columns 26 through 30

   0.009761919145368   0.008247345957167                   0                   0                   0

  Columns 31 through 35

                   0                   0                   0                   0                   0

  Columns 36 through 40

                   0                   0                   0                   0                   0

  Columns 41 through 45

                   0                   0                   0                   0                   0

  Columns 46 through 50

                   0                   0                   0                   0                   0

  Columns 51 through 55

                   0                   0                   0                   0                   0

  Columns 56 through 60

                   0                   0                   0                   0                   0

  Column 61

                   0


outer_code_BER =

  Columns 1 through 5

   0.085397029963518   0.081516509511760   0.077666073748954   0.073851383502990   0.070078629585699

  Columns 6 through 10

   0.066354498014021   0.062686082311361   0.059080731355427   0.055545827275249   0.052088498155023

  Columns 11 through 15

   0.048715283770194   0.045431786582278   0.042242350949778   0.039149817585280   0.036155396729176

  Columns 16 through 20

   0.033258695152937   0.030457925523071   0.027750330632856   0.025132878068968   0.022603326835386

  Columns 21 through 25

   0.020161822098975   0.017813165018055   0.015569613466296   0.013453084093022   0.011493847329783

  Columns 26 through 30

   0.009722206259859   0.008154394857859                   0                   0                   0

  Columns 31 through 35

                   0                   0                   0                   0                   0

  Columns 36 through 40

                   0                   0                   0                   0                   0

  Columns 41 through 45

                   0                   0                   0                   0                   0

  Columns 46 through 50

                   0                   0                   0                   0                   0

  Columns 51 through 55

                   0                   0                   0                   0                   0

  Columns 56 through 60

                   0                   0                   0                   0                   0

  Column 61

                   0


inner_code_BER =

  Columns 1 through 5

   0.085397029963518   0.081516509511755   0.077666073748937   0.073851383502928   0.070078629585463

  Columns 6 through 10

   0.066354498013175   0.062686082308447   0.059080731345821   0.055545827244992   0.052088498064065

  Columns 11 through 15

   0.048715283509483   0.045431785870327   0.042242349098492   0.039149813003319   0.036155385939879

  Columns 16 through 20

   0.033258671000979   0.030457874218112   0.027750227624111   0.025132684367582   0.022602993058709

  Columns 21 through 25

   0.020161325337567   0.017812655048366   0.015569872086364   0.013456730899238   0.011507877720732

  Columns 26 through 30

   0.009761919145368   0.008247345957167   0.006970096541134                   0                   0

  Columns 31 through 35

                   0                   0                   0                   0                   0

  Columns 36 through 40

                   0                   0                   0                   0                   0

  Columns 41 through 45

                   0                   0                   0                   0                   0

  Columns 46 through 50

                   0                   0                   0                   0                   0

  Columns 51 through 55

                   0                   0                   0                   0                   0

  Columns 56 through 60

                   0                   0                   0                   0                   0

  Column 61

                   0


outer_code_BER =

  Columns 1 through 5

   0.085397029963518   0.081516509511760   0.077666073748954   0.073851383502990   0.070078629585699

  Columns 6 through 10

   0.066354498014021   0.062686082311361   0.059080731355427   0.055545827275249   0.052088498155023

  Columns 11 through 15

   0.048715283770194   0.045431786582278   0.042242350949778   0.039149817585280   0.036155396729176

  Columns 16 through 20

   0.033258695152937   0.030457925523071   0.027750330632856   0.025132878068968   0.022603326835386

  Columns 21 through 25

   0.020161822098975   0.017813165018055   0.015569613466296   0.013453084093022   0.011493847329783

  Columns 26 through 30

   0.009722206259859   0.008154394857859   0.006781781592663                   0                   0

  Columns 31 through 35

                   0                   0                   0                   0                   0

  Columns 36 through 40

                   0                   0                   0                   0                   0

  Columns 41 through 45

                   0                   0                   0                   0                   0

  Columns 46 through 50

                   0                   0                   0                   0                   0

  Columns 51 through 55

                   0                   0                   0                   0                   0

  Columns 56 through 60

                   0                   0                   0                   0                   0

  Column 61

                   0


inner_code_BER =

  Columns 1 through 5

   0.085397029963518   0.081516509511755   0.077666073748937   0.073851383502928   0.070078629585463

  Columns 6 through 10

   0.066354498013175   0.062686082308447   0.059080731345821   0.055545827244992   0.052088498064065

  Columns 11 through 15

   0.048715283509483   0.045431785870327   0.042242349098492   0.039149813003319   0.036155385939879

  Columns 16 through 20

   0.033258671000979   0.030457874218112   0.027750227624111   0.025132684367582   0.022602993058709

  Columns 21 through 25

   0.020161325337567   0.017812655048366   0.015569872086364   0.013456730899238   0.011507877720732

  Columns 26 through 30

   0.009761919145368   0.008247345957167   0.006970096541134   0.005912833406342                   0

  Columns 31 through 35

                   0                   0                   0                   0                   0

  Columns 36 through 40

                   0                   0                   0                   0                   0

  Columns 41 through 45

                   0                   0                   0                   0                   0

  Columns 46 through 50

                   0                   0                   0                   0                   0

  Columns 51 through 55

                   0                   0                   0                   0                   0

  Columns 56 through 60

                   0                   0                   0                   0                   0

  Column 61

                   0


outer_code_BER =

  Columns 1 through 5

   0.085397029963518   0.081516509511760   0.077666073748954   0.073851383502990   0.070078629585699

  Columns 6 through 10

   0.066354498014021   0.062686082311361   0.059080731355427   0.055545827275249   0.052088498155023

  Columns 11 through 15

   0.048715283770194   0.045431786582278   0.042242350949778   0.039149817585280   0.036155396729176

  Columns 16 through 20

   0.033258695152937   0.030457925523071   0.027750330632856   0.025132878068968   0.022603326835386

  Columns 21 through 25

   0.020161822098975   0.017813165018055   0.015569613466296   0.013453084093022   0.011493847329783

  Columns 26 through 30

   0.009722206259859   0.008154394857859   0.006781781592663   0.005570235260828                   0

  Columns 31 through 35

                   0                   0                   0                   0                   0

  Columns 36 through 40

                   0                   0                   0                   0                   0

  Columns 41 through 45

                   0                   0                   0                   0                   0

  Columns 46 through 50

                   0                   0                   0                   0                   0

  Columns 51 through 55

                   0                   0                   0                   0                   0

  Columns 56 through 60

                   0                   0                   0                   0                   0

  Column 61

                   0


inner_code_BER =

  Columns 1 through 5

   0.085397029963518   0.081516509511755   0.077666073748937   0.073851383502928   0.070078629585463

  Columns 6 through 10

   0.066354498013175   0.062686082308447   0.059080731345821   0.055545827244992   0.052088498064065

  Columns 11 through 15

   0.048715283509483   0.045431785870327   0.042242349098492   0.039149813003319   0.036155385939879

  Columns 16 through 20

   0.033258671000979   0.030457874218112   0.027750227624111   0.025132684367582   0.022602993058709

  Columns 21 through 25

   0.020161325337567   0.017812655048366   0.015569872086364   0.013456730899238   0.011507877720732

  Columns 26 through 30

   0.009761919145368   0.008247345957167   0.006970096541134   0.005912833406342   0.005044491177492

  Columns 31 through 35

                   0                   0                   0                   0                   0

  Columns 36 through 40

                   0                   0                   0                   0                   0

  Columns 41 through 45

                   0                   0                   0                   0                   0

  Columns 46 through 50

                   0                   0                   0                   0                   0

  Columns 51 through 55

                   0                   0                   0                   0                   0

  Columns 56 through 60

                   0                   0                   0                   0                   0

  Column 61

                   0


outer_code_BER =

  Columns 1 through 5

   0.085397029963518   0.081516509511760   0.077666073748954   0.073851383502990   0.070078629585699

  Columns 6 through 10

   0.066354498014021   0.062686082311361   0.059080731355427   0.055545827275249   0.052088498155023

  Columns 11 through 15

   0.048715283770194   0.045431786582278   0.042242350949778   0.039149817585280   0.036155396729176

  Columns 16 through 20

   0.033258695152937   0.030457925523071   0.027750330632856   0.025132878068968   0.022603326835386

  Columns 21 through 25

   0.020161822098975   0.017813165018055   0.015569613466296   0.013453084093022   0.011493847329783

  Columns 26 through 30

   0.009722206259859   0.008154394857859   0.006781781592663   0.005570235260828   0.004461384160295

  Columns 31 through 35

                   0                   0                   0                   0                   0

  Columns 36 through 40

                   0                   0                   0                   0                   0

  Columns 41 through 45

                   0                   0                   0                   0                   0

  Columns 46 through 50

                   0                   0                   0                   0                   0

  Columns 51 through 55

                   0                   0                   0                   0                   0

  Columns 56 through 60

                   0                   0                   0                   0                   0

  Column 61

                   0


inner_code_BER =

  Columns 1 through 5

   0.085397029963518   0.081516509511755   0.077666073748937   0.073851383502928   0.070078629585463

  Columns 6 through 10

   0.066354498013175   0.062686082308447   0.059080731345821   0.055545827244992   0.052088498064065

  Columns 11 through 15

   0.048715283509483   0.045431785870327   0.042242349098492   0.039149813003319   0.036155385939879

  Columns 16 through 20

   0.033258671000979   0.030457874218112   0.027750227624111   0.025132684367582   0.022602993058709

  Columns 21 through 25

   0.020161325337567   0.017812655048366   0.015569872086364   0.013456730899238   0.011507877720732

  Columns 26 through 30

   0.009761919145368   0.008247345957167   0.006970096541134   0.005912833406342   0.005044491177492

  Columns 31 through 35

   0.004330936809254                   0                   0                   0                   0

  Columns 36 through 40

                   0                   0                   0                   0                   0

  Columns 41 through 45

                   0                   0                   0                   0                   0

  Columns 46 through 50

                   0                   0                   0                   0                   0

  Columns 51 through 55

                   0                   0                   0                   0                   0

  Columns 56 through 60

                   0                   0                   0                   0                   0

  Column 61

                   0


outer_code_BER =

  Columns 1 through 5

   0.085397029963518   0.081516509511760   0.077666073748954   0.073851383502990   0.070078629585699

  Columns 6 through 10

   0.066354498014021   0.062686082311361   0.059080731355427   0.055545827275249   0.052088498155023

  Columns 11 through 15

   0.048715283770194   0.045431786582278   0.042242350949778   0.039149817585280   0.036155396729176

  Columns 16 through 20

   0.033258695152937   0.030457925523071   0.027750330632856   0.025132878068968   0.022603326835386

  Columns 21 through 25

   0.020161822098975   0.017813165018055   0.015569613466296   0.013453084093022   0.011493847329783

  Columns 26 through 30

   0.009722206259859   0.008154394857859   0.006781781592663   0.005570235260828   0.004461384160295

  Columns 31 through 35

   0.003334792806946                   0                   0                   0                   0

  Columns 36 through 40

                   0                   0                   0                   0                   0

  Columns 41 through 45

                   0                   0                   0                   0                   0

  Columns 46 through 50

                   0                   0                   0                   0                   0

  Columns 51 through 55

                   0                   0                   0                   0                   0

  Columns 56 through 60

                   0                   0                   0                   0                   0

  Column 61

                   0


inner_code_BER =

  Columns 1 through 5

   0.085397029963518   0.081516509511755   0.077666073748937   0.073851383502928   0.070078629585463

  Columns 6 through 10

   0.066354498013175   0.062686082308447   0.059080731345821   0.055545827244992   0.052088498064065

  Columns 11 through 15

   0.048715283509483   0.045431785870327   0.042242349098492   0.039149813003319   0.036155385939879

  Columns 16 through 20

   0.033258671000979   0.030457874218112   0.027750227624111   0.025132684367582   0.022602993058709

  Columns 21 through 25

   0.020161325337567   0.017812655048366   0.015569872086364   0.013456730899238   0.011507877720732

  Columns 26 through 30

   0.009761919145368   0.008247345957167   0.006970096541134   0.005912833406342   0.005044491177492

  Columns 31 through 35

   0.004330936809254   0.003741315118494                   0                   0                   0

  Columns 36 through 40

                   0                   0                   0                   0                   0

  Columns 41 through 45

                   0                   0                   0                   0                   0

  Columns 46 through 50

                   0                   0                   0                   0                   0

  Columns 51 through 55

                   0                   0                   0                   0                   0

  Columns 56 through 60

                   0                   0                   0                   0                   0

  Column 61

                   0


outer_code_BER =

  Columns 1 through 5

   0.085397029963518   0.081516509511760   0.077666073748954   0.073851383502990   0.070078629585699

  Columns 6 through 10

   0.066354498014021   0.062686082311361   0.059080731355427   0.055545827275249   0.052088498155023

  Columns 11 through 15

   0.048715283770194   0.045431786582278   0.042242350949778   0.039149817585280   0.036155396729176

  Columns 16 through 20

   0.033258695152937   0.030457925523071   0.027750330632856   0.025132878068968   0.022603326835386

  Columns 21 through 25

   0.020161822098975   0.017813165018055   0.015569613466296   0.013453084093022   0.011493847329783

  Columns 26 through 30

   0.009722206259859   0.008154394857859   0.006781781592663   0.005570235260828   0.004461384160295

  Columns 31 through 35

   0.003334792806946   0.000000000033768                   0                   0                   0

  Columns 36 through 40

                   0                   0                   0                   0                   0

  Columns 41 through 45

                   0                   0                   0                   0                   0

  Columns 46 through 50

                   0                   0                   0                   0                   0

  Columns 51 through 55

                   0                   0                   0                   0                   0

  Columns 56 through 60

                   0                   0                   0                   0                   0

  Column 61

                   0

��ǰ�����������ѵ���Ŀ�������ʣ������Ϊ3.10 dB

inner_code_BER =

  Columns 1 through 5

   0.085397029963518   0.081516509511755   0.077666073748937   0.073851383502928   0.070078629585463

  Columns 6 through 10

   0.066354498013175   0.062686082308447   0.059080731345821   0.055545827244992   0.052088498064065

  Columns 11 through 15

   0.048715283509483   0.045431785870327   0.042242349098492   0.039149813003319   0.036155385939879

  Columns 16 through 20

   0.033258671000979   0.030457874218112   0.027750227624111   0.025132684367582   0.022602993058709

  Columns 21 through 25

   0.020161325337567   0.017812655048366   0.015569872086364   0.013456730899238   0.011507877720732

  Columns 26 through 30

   0.009761919145368   0.008247345957167   0.006970096541134   0.005912833406342   0.005044491177492

  Columns 31 through 35

   0.004330936809254   0.003741315118494   0.003250227670382                   0                   0

  Columns 36 through 40

                   0                   0                   0                   0                   0

  Columns 41 through 45

                   0                   0                   0                   0                   0

  Columns 46 through 50

                   0                   0                   0                   0                   0

  Columns 51 through 55

                   0                   0                   0                   0                   0

  Columns 56 through 60

                   0                   0                   0                   0                   0

  Column 61

                   0


inner_code_BER =

  Columns 1 through 5

   0.085397029963518   0.081516509511755   0.077666073748937   0.073851383502928   0.070078629585463

  Columns 6 through 10

   0.066354498013175   0.062686082308447   0.059080731345821   0.055545827244992   0.052088498064065

  Columns 11 through 15

   0.048715283509483   0.045431785870327   0.042242349098492   0.039149813003319   0.036155385939879

  Columns 16 through 20

   0.033258671000979   0.030457874218112   0.027750227624111   0.025132684367582   0.022602993058709

  Columns 21 through 25

   0.020161325337567   0.017812655048366   0.015569872086364   0.013456730899238   0.011507877720732

  Columns 26 through 30

   0.009761919145368   0.008247345957167   0.006970096541134   0.005912833406342   0.005044491177492

  Columns 31 through 35

   0.004330936809254   0.003741315118494   0.003250227670382   0.002837665247985                   0

  Columns 36 through 40

                   0                   0                   0                   0                   0

  Columns 41 through 45

                   0                   0                   0                   0                   0

  Columns 46 through 50

                   0                   0                   0                   0                   0

  Columns 51 through 55

                   0                   0                   0                   0                   0

  Columns 56 through 60

                   0                   0                   0                   0                   0

  Column 61

                   0


inner_code_BER =

  Columns 1 through 5

   0.085397029963518   0.081516509511755   0.077666073748937   0.073851383502928   0.070078629585463

  Columns 6 through 10

   0.066354498013175   0.062686082308447   0.059080731345821   0.055545827244992   0.052088498064065

  Columns 11 through 15

   0.048715283509483   0.045431785870327   0.042242349098492   0.039149813003319   0.036155385939879

  Columns 16 through 20

   0.033258671000979   0.030457874218112   0.027750227624111   0.025132684367582   0.022602993058709

  Columns 21 through 25

   0.020161325337567   0.017812655048366   0.015569872086364   0.013456730899238   0.011507877720732

  Columns 26 through 30

   0.009761919145368   0.008247345957167   0.006970096541134   0.005912833406342   0.005044491177492

  Columns 31 through 35

   0.004330936809254   0.003741315118494   0.003250227670382   0.002837665247985   0.002488136201551

  Columns 36 through 40

                   0                   0                   0                   0                   0

  Columns 41 through 45

                   0                   0                   0                   0                   0

  Columns 46 through 50

                   0                   0                   0                   0                   0

  Columns 51 through 55

                   0                   0                   0                   0                   0

  Columns 56 through 60

                   0                   0                   0                   0                   0

  Column 61

                   0


inner_code_BER =

  Columns 1 through 5

   0.085397029963518   0.081516509511755   0.077666073748937   0.073851383502928   0.070078629585463

  Columns 6 through 10

   0.066354498013175   0.062686082308447   0.059080731345821   0.055545827244992   0.052088498064065

  Columns 11 through 15

   0.048715283509483   0.045431785870327   0.042242349098492   0.039149813003319   0.036155385939879

  Columns 16 through 20

   0.033258671000979   0.030457874218112   0.027750227624111   0.025132684367582   0.022602993058709

  Columns 21 through 25

   0.020161325337567   0.017812655048366   0.015569872086364   0.013456730899238   0.011507877720732

  Columns 26 through 30

   0.009761919145368   0.008247345957167   0.006970096541134   0.005912833406342   0.005044491177492

  Columns 31 through 35

   0.004330936809254   0.003741315118494   0.003250227670382   0.002837665247985   0.002488136201551

  Columns 36 through 40

   0.002189684365584                   0                   0                   0                   0

  Columns 41 through 45

                   0                   0                   0                   0                   0

  Columns 46 through 50

                   0                   0                   0                   0                   0

  Columns 51 through 55

                   0                   0                   0                   0                   0

  Columns 56 through 60

                   0                   0                   0                   0                   0

  Column 61

                   0


inner_code_BER =

  Columns 1 through 5

   0.085397029963518   0.081516509511755   0.077666073748937   0.073851383502928   0.070078629585463

  Columns 6 through 10

   0.066354498013175   0.062686082308447   0.059080731345821   0.055545827244992   0.052088498064065

  Columns 11 through 15

   0.048715283509483   0.045431785870327   0.042242349098492   0.039149813003319   0.036155385939879

  Columns 16 through 20

   0.033258671000979   0.030457874218112   0.027750227624111   0.025132684367582   0.022602993058709

  Columns 21 through 25

   0.020161325337567   0.017812655048366   0.015569872086364   0.013456730899238   0.011507877720732

  Columns 26 through 30

   0.009761919145368   0.008247345957167   0.006970096541134   0.005912833406342   0.005044491177492

  Columns 31 through 35

   0.004330936809254   0.003741315118494   0.003250227670382   0.002837665247985   0.002488136201551

  Columns 36 through 40

   0.002189684365584   0.001933041847984                   0                   0                   0

  Columns 41 through 45

                   0                   0                   0                   0                   0

  Columns 46 through 50

                   0                   0                   0                   0                   0

  Columns 51 through 55

                   0                   0                   0                   0                   0

  Columns 56 through 60

                   0                   0                   0                   0                   0

  Column 61

                   0


inner_code_BER =

  Columns 1 through 5

   0.085397029963518   0.081516509511755   0.077666073748937   0.073851383502928   0.070078629585463

  Columns 6 through 10

   0.066354498013175   0.062686082308447   0.059080731345821   0.055545827244992   0.052088498064065

  Columns 11 through 15

   0.048715283509483   0.045431785870327   0.042242349098492   0.039149813003319   0.036155385939879

  Columns 16 through 20

   0.033258671000979   0.030457874218112   0.027750227624111   0.025132684367582   0.022602993058709

  Columns 21 through 25

   0.020161325337567   0.017812655048366   0.015569872086364   0.013456730899238   0.011507877720732

  Columns 26 through 30

   0.009761919145368   0.008247345957167   0.006970096541134   0.005912833406342   0.005044491177492

  Columns 31 through 35

   0.004330936809254   0.003741315118494   0.003250227670382   0.002837665247985   0.002488136201551

  Columns 36 through 40

   0.002189684365584   0.001933041847984   0.001710965673467                   0                   0

  Columns 41 through 45

                   0                   0                   0                   0                   0

  Columns 46 through 50

                   0                   0                   0                   0                   0

  Columns 51 through 55

                   0                   0                   0                   0                   0

  Columns 56 through 60

                   0                   0                   0                   0                   0

  Column 61

                   0


inner_code_BER =

  Columns 1 through 5

   0.085397029963518   0.081516509511755   0.077666073748937   0.073851383502928   0.070078629585463

  Columns 6 through 10

   0.066354498013175   0.062686082308447   0.059080731345821   0.055545827244992   0.052088498064065

  Columns 11 through 15

   0.048715283509483   0.045431785870327   0.042242349098492   0.039149813003319   0.036155385939879

  Columns 16 through 20

   0.033258671000979   0.030457874218112   0.027750227624111   0.025132684367582   0.022602993058709

  Columns 21 through 25

   0.020161325337567   0.017812655048366   0.015569872086364   0.013456730899238   0.011507877720732

  Columns 26 through 30

   0.009761919145368   0.008247345957167   0.006970096541134   0.005912833406342   0.005044491177492

  Columns 31 through 35

   0.004330936809254   0.003741315118494   0.003250227670382   0.002837665247985   0.002488136201551

  Columns 36 through 40

   0.002189684365584   0.001933041847984   0.001710965673467   0.001517739038520                   0

  Columns 41 through 45

                   0                   0                   0                   0                   0

  Columns 46 through 50

                   0                   0                   0                   0                   0

  Columns 51 through 55

                   0                   0                   0                   0                   0

  Columns 56 through 60

                   0                   0                   0                   0                   0

  Column 61

                   0


inner_code_BER =

  Columns 1 through 5

   0.085397029963518   0.081516509511755   0.077666073748937   0.073851383502928   0.070078629585463

  Columns 6 through 10

   0.066354498013175   0.062686082308447   0.059080731345821   0.055545827244992   0.052088498064065

  Columns 11 through 15

   0.048715283509483   0.045431785870327   0.042242349098492   0.039149813003319   0.036155385939879

  Columns 16 through 20

   0.033258671000979   0.030457874218112   0.027750227624111   0.025132684367582   0.022602993058709

  Columns 21 through 25

   0.020161325337567   0.017812655048366   0.015569872086364   0.013456730899238   0.011507877720732

  Columns 26 through 30

   0.009761919145368   0.008247345957167   0.006970096541134   0.005912833406342   0.005044491177492

  Columns 31 through 35

   0.004330936809254   0.003741315118494   0.003250227670382   0.002837665247985   0.002488136201551

  Columns 36 through 40

   0.002189684365584   0.001933041847984   0.001710965673467   0.001517739038520   0.001348802157983

  Columns 41 through 45

                   0                   0                   0                   0                   0

  Columns 46 through 50

                   0                   0                   0                   0                   0

  Columns 51 through 55

                   0                   0                   0                   0                   0

  Columns 56 through 60

                   0                   0                   0                   0                   0

  Column 61

                   0


inner_code_BER =

  Columns 1 through 5

   0.085397029963518   0.081516509511755   0.077666073748937   0.073851383502928   0.070078629585463

  Columns 6 through 10

   0.066354498013175   0.062686082308447   0.059080731345821   0.055545827244992   0.052088498064065

  Columns 11 through 15

   0.048715283509483   0.045431785870327   0.042242349098492   0.039149813003319   0.036155385939879

  Columns 16 through 20

   0.033258671000979   0.030457874218112   0.027750227624111   0.025132684367582   0.022602993058709

  Columns 21 through 25

   0.020161325337567   0.017812655048366   0.015569872086364   0.013456730899238   0.011507877720732

  Columns 26 through 30

   0.009761919145368   0.008247345957167   0.006970096541134   0.005912833406342   0.005044491177492

  Columns 31 through 35

   0.004330936809254   0.003741315118494   0.003250227670382   0.002837665247985   0.002488136201551

  Columns 36 through 40

   0.002189684365584   0.001933041847984   0.001710965673467   0.001517739038520   0.001348802157983

  Columns 41 through 45

   0.001200479909453                   0                   0                   0                   0

  Columns 46 through 50

                   0                   0                   0                   0                   0

  Columns 51 through 55

                   0                   0                   0                   0                   0

  Columns 56 through 60

                   0                   0                   0                   0                   0

  Column 61

                   0


inner_code_BER =

  Columns 1 through 5

   0.085397029963518   0.081516509511755   0.077666073748937   0.073851383502928   0.070078629585463

  Columns 6 through 10

   0.066354498013175   0.062686082308447   0.059080731345821   0.055545827244992   0.052088498064065

  Columns 11 through 15

   0.048715283509483   0.045431785870327   0.042242349098492   0.039149813003319   0.036155385939879

  Columns 16 through 20

   0.033258671000979   0.030457874218112   0.027750227624111   0.025132684367582   0.022602993058709

  Columns 21 through 25

   0.020161325337567   0.017812655048366   0.015569872086364   0.013456730899238   0.011507877720732

  Columns 26 through 30

   0.009761919145368   0.008247345957167   0.006970096541134   0.005912833406342   0.005044491177492

  Columns 31 through 35

   0.004330936809254   0.003741315118494   0.003250227670382   0.002837665247985   0.002488136201551

  Columns 36 through 40

   0.002189684365584   0.001933041847984   0.001710965673467   0.001517739038520   0.001348802157983

  Columns 41 through 45

   0.001200479909453   0.001069780223030                   0                   0                   0

  Columns 46 through 50

                   0                   0                   0                   0                   0

  Columns 51 through 55

                   0                   0                   0                   0                   0

  Columns 56 through 60

                   0                   0                   0                   0                   0

  Column 61

                   0


inner_code_BER =

  Columns 1 through 5

   0.085397029963518   0.081516509511755   0.077666073748937   0.073851383502928   0.070078629585463

  Columns 6 through 10

   0.066354498013175   0.062686082308447   0.059080731345821   0.055545827244992   0.052088498064065

  Columns 11 through 15

   0.048715283509483   0.045431785870327   0.042242349098492   0.039149813003319   0.036155385939879

  Columns 16 through 20

   0.033258671000979   0.030457874218112   0.027750227624111   0.025132684367582   0.022602993058709

  Columns 21 through 25

   0.020161325337567   0.017812655048366   0.015569872086364   0.013456730899238   0.011507877720732

  Columns 26 through 30

   0.009761919145368   0.008247345957167   0.006970096541134   0.005912833406342   0.005044491177492

  Columns 31 through 35

   0.004330936809254   0.003741315118494   0.003250227670382   0.002837665247985   0.002488136201551

  Columns 36 through 40

   0.002189684365584   0.001933041847984   0.001710965673467   0.001517739038520   0.001348802157983

  Columns 41 through 45

   0.001200479909453   0.001069780223030   0.000954243818852                   0                   0

  Columns 46 through 50

                   0                   0                   0                   0                   0

  Columns 51 through 55

                   0                   0                   0                   0                   0

  Columns 56 through 60

                   0                   0                   0                   0                   0

  Column 61

                   0


inner_code_BER =

  Columns 1 through 5

   0.085397029963518   0.081516509511755   0.077666073748937   0.073851383502928   0.070078629585463

  Columns 6 through 10

   0.066354498013175   0.062686082308447   0.059080731345821   0.055545827244992   0.052088498064065

  Columns 11 through 15

   0.048715283509483   0.045431785870327   0.042242349098492   0.039149813003319   0.036155385939879

  Columns 16 through 20

   0.033258671000979   0.030457874218112   0.027750227624111   0.025132684367582   0.022602993058709

  Columns 21 through 25

   0.020161325337567   0.017812655048366   0.015569872086364   0.013456730899238   0.011507877720732

  Columns 26 through 30

   0.009761919145368   0.008247345957167   0.006970096541134   0.005912833406342   0.005044491177492

  Columns 31 through 35

   0.004330936809254   0.003741315118494   0.003250227670382   0.002837665247985   0.002488136201551

  Columns 36 through 40

   0.002189684365584   0.001933041847984   0.001710965673467   0.001517739038520   0.001348802157983

  Columns 41 through 45

   0.001200479909453   0.001069780223030   0.000954243818852   0.000851831245595                   0

  Columns 46 through 50

                   0                   0                   0                   0                   0

  Columns 51 through 55

                   0                   0                   0                   0                   0

  Columns 56 through 60

                   0                   0                   0                   0                   0

  Column 61

                   0


inner_code_BER =

  Columns 1 through 5

   0.085397029963518   0.081516509511755   0.077666073748937   0.073851383502928   0.070078629585463

  Columns 6 through 10

   0.066354498013175   0.062686082308447   0.059080731345821   0.055545827244992   0.052088498064065

  Columns 11 through 15

   0.048715283509483   0.045431785870327   0.042242349098492   0.039149813003319   0.036155385939879

  Columns 16 through 20

   0.033258671000979   0.030457874218112   0.027750227624111   0.025132684367582   0.022602993058709

  Columns 21 through 25

   0.020161325337567   0.017812655048366   0.015569872086364   0.013456730899238   0.011507877720732

  Columns 26 through 30

   0.009761919145368   0.008247345957167   0.006970096541134   0.005912833406342   0.005044491177492

  Columns 31 through 35

   0.004330936809254   0.003741315118494   0.003250227670382   0.002837665247985   0.002488136201551

  Columns 36 through 40

   0.002189684365584   0.001933041847984   0.001710965673467   0.001517739038520   0.001348802157983

  Columns 41 through 45

   0.001200479909453   0.001069780223030   0.000954243818852   0.000851831245595   0.000760837154218

  Columns 46 through 50

                   0                   0                   0                   0                   0

  Columns 51 through 55

                   0                   0                   0                   0                   0

  Columns 56 through 60

                   0                   0                   0                   0                   0

  Column 61

                   0


inner_code_BER =

  Columns 1 through 5

   0.085397029963518   0.081516509511755   0.077666073748937   0.073851383502928   0.070078629585463

  Columns 6 through 10

   0.066354498013175   0.062686082308447   0.059080731345821   0.055545827244992   0.052088498064065

  Columns 11 through 15

   0.048715283509483   0.045431785870327   0.042242349098492   0.039149813003319   0.036155385939879

  Columns 16 through 20

   0.033258671000979   0.030457874218112   0.027750227624111   0.025132684367582   0.022602993058709

  Columns 21 through 25

   0.020161325337567   0.017812655048366   0.015569872086364   0.013456730899238   0.011507877720732

  Columns 26 through 30

   0.009761919145368   0.008247345957167   0.006970096541134   0.005912833406342   0.005044491177492

  Columns 31 through 35

   0.004330936809254   0.003741315118494   0.003250227670382   0.002837665247985   0.002488136201551

  Columns 36 through 40

   0.002189684365584   0.001933041847984   0.001710965673467   0.001517739038520   0.001348802157983

  Columns 41 through 45

   0.001200479909453   0.001069780223030   0.000954243818852   0.000851831245595   0.000760837154218

  Columns 46 through 50

   0.000679824605115                   0                   0                   0                   0

  Columns 51 through 55

                   0                   0                   0                   0                   0

  Columns 56 through 60

                   0                   0                   0                   0                   0

  Column 61

                   0


inner_code_BER =

  Columns 1 through 5

   0.085397029963518   0.081516509511755   0.077666073748937   0.073851383502928   0.070078629585463

  Columns 6 through 10

   0.066354498013175   0.062686082308447   0.059080731345821   0.055545827244992   0.052088498064065

  Columns 11 through 15

   0.048715283509483   0.045431785870327   0.042242349098492   0.039149813003319   0.036155385939879

  Columns 16 through 20

   0.033258671000979   0.030457874218112   0.027750227624111   0.025132684367582   0.022602993058709

  Columns 21 through 25

   0.020161325337567   0.017812655048366   0.015569872086364   0.013456730899238   0.011507877720732

  Columns 26 through 30

   0.009761919145368   0.008247345957167   0.006970096541134   0.005912833406342   0.005044491177492

  Columns 31 through 35

   0.004330936809254   0.003741315118494   0.003250227670382   0.002837665247985   0.002488136201551

  Columns 36 through 40

   0.002189684365584   0.001933041847984   0.001710965673467   0.001517739038520   0.001348802157983

  Columns 41 through 45

   0.001200479909453   0.001069780223030   0.000954243818852   0.000851831245595   0.000760837154218

  Columns 46 through 50

   0.000679824605115   0.000607574238297                   0                   0                   0

  Columns 51 through 55

                   0                   0                   0                   0                   0

  Columns 56 through 60

                   0                   0                   0                   0                   0

  Column 61

                   0


inner_code_BER =

  Columns 1 through 5

   0.085397029963518   0.081516509511755   0.077666073748937   0.073851383502928   0.070078629585463

  Columns 6 through 10

   0.066354498013175   0.062686082308447   0.059080731345821   0.055545827244992   0.052088498064065

  Columns 11 through 15

   0.048715283509483   0.045431785870327   0.042242349098492   0.039149813003319   0.036155385939879

  Columns 16 through 20

   0.033258671000979   0.030457874218112   0.027750227624111   0.025132684367582   0.022602993058709

  Columns 21 through 25

   0.020161325337567   0.017812655048366   0.015569872086364   0.013456730899238   0.011507877720732

  Columns 26 through 30

   0.009761919145368   0.008247345957167   0.006970096541134   0.005912833406342   0.005044491177492

  Columns 31 through 35

   0.004330936809254   0.003741315118494   0.003250227670382   0.002837665247985   0.002488136201551

  Columns 36 through 40

   0.002189684365584   0.001933041847984   0.001710965673467   0.001517739038520   0.001348802157983

  Columns 41 through 45

   0.001200479909453   0.001069780223030   0.000954243818852   0.000851831245595   0.000760837154218

  Columns 46 through 50

   0.000679824605115   0.000607574238297   0.000543044571792                   0                   0

  Columns 51 through 55

                   0                   0                   0                   0                   0

  Columns 56 through 60

                   0                   0                   0                   0                   0

  Column 61

                   0


inner_code_BER =

  Columns 1 through 5

   0.085397029963518   0.081516509511755   0.077666073748937   0.073851383502928   0.070078629585463

  Columns 6 through 10

   0.066354498013175   0.062686082308447   0.059080731345821   0.055545827244992   0.052088498064065

  Columns 11 through 15

   0.048715283509483   0.045431785870327   0.042242349098492   0.039149813003319   0.036155385939879

  Columns 16 through 20

   0.033258671000979   0.030457874218112   0.027750227624111   0.025132684367582   0.022602993058709

  Columns 21 through 25

   0.020161325337567   0.017812655048366   0.015569872086364   0.013456730899238   0.011507877720732

  Columns 26 through 30

   0.009761919145368   0.008247345957167   0.006970096541134   0.005912833406342   0.005044491177492

  Columns 31 through 35

   0.004330936809254   0.003741315118494   0.003250227670382   0.002837665247985   0.002488136201551

  Columns 36 through 40

   0.002189684365584   0.001933041847984   0.001710965673467   0.001517739038520   0.001348802157983

  Columns 41 through 45

   0.001200479909453   0.001069780223030   0.000954243818852   0.000851831245595   0.000760837154218

  Columns 46 through 50

   0.000679824605115   0.000607574238297   0.000543044571792   0.000485340709533                   0

  Columns 51 through 55

                   0                   0                   0                   0                   0

  Columns 56 through 60

                   0                   0                   0                   0                   0

  Column 61

                   0


inner_code_BER =

  Columns 1 through 5

   0.085397029963518   0.081516509511755   0.077666073748937   0.073851383502928   0.070078629585463

  Columns 6 through 10

   0.066354498013175   0.062686082308447   0.059080731345821   0.055545827244992   0.052088498064065

  Columns 11 through 15

   0.048715283509483   0.045431785870327   0.042242349098492   0.039149813003319   0.036155385939879

  Columns 16 through 20

   0.033258671000979   0.030457874218112   0.027750227624111   0.025132684367582   0.022602993058709

  Columns 21 through 25

   0.020161325337567   0.017812655048366   0.015569872086364   0.013456730899238   0.011507877720732

  Columns 26 through 30

   0.009761919145368   0.008247345957167   0.006970096541134   0.005912833406342   0.005044491177492

  Columns 31 through 35

   0.004330936809254   0.003741315118494   0.003250227670382   0.002837665247985   0.002488136201551

  Columns 36 through 40

   0.002189684365584   0.001933041847984   0.001710965673467   0.001517739038520   0.001348802157983

  Columns 41 through 45

   0.001200479909453   0.001069780223030   0.000954243818852   0.000851831245595   0.000760837154218

  Columns 46 through 50

   0.000679824605115   0.000607574238297   0.000543044571792   0.000485340709533   0.000433689462925

  Columns 51 through 55

                   0                   0                   0                   0                   0

  Columns 56 through 60

                   0                   0                   0                   0                   0

  Column 61

                   0


inner_code_BER =

  Columns 1 through 5

   0.085397029963518   0.081516509511755   0.077666073748937   0.073851383502928   0.070078629585463

  Columns 6 through 10

   0.066354498013175   0.062686082308447   0.059080731345821   0.055545827244992   0.052088498064065

  Columns 11 through 15

   0.048715283509483   0.045431785870327   0.042242349098492   0.039149813003319   0.036155385939879

  Columns 16 through 20

   0.033258671000979   0.030457874218112   0.027750227624111   0.025132684367582   0.022602993058709

  Columns 21 through 25

   0.020161325337567   0.017812655048366   0.015569872086364   0.013456730899238   0.011507877720732

  Columns 26 through 30

   0.009761919145368   0.008247345957167   0.006970096541134   0.005912833406342   0.005044491177492

  Columns 31 through 35

   0.004330936809254   0.003741315118494   0.003250227670382   0.002837665247985   0.002488136201551

  Columns 36 through 40

   0.002189684365584   0.001933041847984   0.001710965673467   0.001517739038520   0.001348802157983

  Columns 41 through 45

   0.001200479909453   0.001069780223030   0.000954243818852   0.000851831245595   0.000760837154218

  Columns 46 through 50

   0.000679824605115   0.000607574238297   0.000543044571792   0.000485340709533   0.000433689462925

  Columns 51 through 55

   0.000387419407948                   0                   0                   0                   0

  Columns 56 through 60

                   0                   0                   0                   0                   0

  Column 61

                   0


inner_code_BER =

  Columns 1 through 5

   0.085397029963518   0.081516509511755   0.077666073748937   0.073851383502928   0.070078629585463

  Columns 6 through 10

   0.066354498013175   0.062686082308447   0.059080731345821   0.055545827244992   0.052088498064065

  Columns 11 through 15

   0.048715283509483   0.045431785870327   0.042242349098492   0.039149813003319   0.036155385939879

  Columns 16 through 20

   0.033258671000979   0.030457874218112   0.027750227624111   0.025132684367582   0.022602993058709

  Columns 21 through 25

   0.020161325337567   0.017812655048366   0.015569872086364   0.013456730899238   0.011507877720732

  Columns 26 through 30

   0.009761919145368   0.008247345957167   0.006970096541134   0.005912833406342   0.005044491177492

  Columns 31 through 35

   0.004330936809254   0.003741315118494   0.003250227670382   0.002837665247985   0.002488136201551

  Columns 36 through 40

   0.002189684365584   0.001933041847984   0.001710965673467   0.001517739038520   0.001348802157983

  Columns 41 through 45

   0.001200479909453   0.001069780223030   0.000954243818852   0.000851831245595   0.000760837154218

  Columns 46 through 50

   0.000679824605115   0.000607574238297   0.000543044571792   0.000485340709533   0.000433689462925

  Columns 51 through 55

   0.000387419407948   0.000345944773299                   0                   0                   0

  Columns 56 through 60

                   0                   0                   0                   0                   0

  Column 61

                   0


inner_code_BER =

  Columns 1 through 5

   0.085397029963518   0.081516509511755   0.077666073748937   0.073851383502928   0.070078629585463

  Columns 6 through 10

   0.066354498013175   0.062686082308447   0.059080731345821   0.055545827244992   0.052088498064065

  Columns 11 through 15

   0.048715283509483   0.045431785870327   0.042242349098492   0.039149813003319   0.036155385939879

  Columns 16 through 20

   0.033258671000979   0.030457874218112   0.027750227624111   0.025132684367582   0.022602993058709

  Columns 21 through 25

   0.020161325337567   0.017812655048366   0.015569872086364   0.013456730899238   0.011507877720732

  Columns 26 through 30

   0.009761919145368   0.008247345957167   0.006970096541134   0.005912833406342   0.005044491177492

  Columns 31 through 35

   0.004330936809254   0.003741315118494   0.003250227670382   0.002837665247985   0.002488136201551

  Columns 36 through 40

   0.002189684365584   0.001933041847984   0.001710965673467   0.001517739038520   0.001348802157983

  Columns 41 through 45

   0.001200479909453   0.001069780223030   0.000954243818852   0.000851831245595   0.000760837154218

  Columns 46 through 50

   0.000679824605115   0.000607574238297   0.000543044571792   0.000485340709533   0.000433689462925

  Columns 51 through 55

   0.000387419407948   0.000345944773299   0.000308752327060                   0                   0

  Columns 56 through 60

                   0                   0                   0                   0                   0

  Column 61

                   0


inner_code_BER =

  Columns 1 through 5

   0.085397029963518   0.081516509511755   0.077666073748937   0.073851383502928   0.070078629585463

  Columns 6 through 10

   0.066354498013175   0.062686082308447   0.059080731345821   0.055545827244992   0.052088498064065

  Columns 11 through 15

   0.048715283509483   0.045431785870327   0.042242349098492   0.039149813003319   0.036155385939879

  Columns 16 through 20

   0.033258671000979   0.030457874218112   0.027750227624111   0.025132684367582   0.022602993058709

  Columns 21 through 25

   0.020161325337567   0.017812655048366   0.015569872086364   0.013456730899238   0.011507877720732

  Columns 26 through 30

   0.009761919145368   0.008247345957167   0.006970096541134   0.005912833406342   0.005044491177492

  Columns 31 through 35

   0.004330936809254   0.003741315118494   0.003250227670382   0.002837665247985   0.002488136201551

  Columns 36 through 40

   0.002189684365584   0.001933041847984   0.001710965673467   0.001517739038520   0.001348802157983

  Columns 41 through 45

   0.001200479909453   0.001069780223030   0.000954243818852   0.000851831245595   0.000760837154218

  Columns 46 through 50

   0.000679824605115   0.000607574238297   0.000543044571792   0.000485340709533   0.000433689462925

  Columns 51 through 55

   0.000387419407948   0.000345944773299   0.000308752327060   0.000275390628955                   0

  Columns 56 through 60

                   0                   0                   0                   0                   0

  Column 61

                   0


inner_code_BER =

  Columns 1 through 5

   0.085397029963518   0.081516509511755   0.077666073748937   0.073851383502928   0.070078629585463

  Columns 6 through 10

   0.066354498013175   0.062686082308447   0.059080731345821   0.055545827244992   0.052088498064065

  Columns 11 through 15

   0.048715283509483   0.045431785870327   0.042242349098492   0.039149813003319   0.036155385939879

  Columns 16 through 20

   0.033258671000979   0.030457874218112   0.027750227624111   0.025132684367582   0.022602993058709

  Columns 21 through 25

   0.020161325337567   0.017812655048366   0.015569872086364   0.013456730899238   0.011507877720732

  Columns 26 through 30

   0.009761919145368   0.008247345957167   0.006970096541134   0.005912833406342   0.005044491177492

  Columns 31 through 35

   0.004330936809254   0.003741315118494   0.003250227670382   0.002837665247985   0.002488136201551

  Columns 36 through 40

   0.002189684365584   0.001933041847984   0.001710965673467   0.001517739038520   0.001348802157983

  Columns 41 through 45

   0.001200479909453   0.001069780223030   0.000954243818852   0.000851831245595   0.000760837154218

  Columns 46 through 50

   0.000679824605115   0.000607574238297   0.000543044571792   0.000485340709533   0.000433689462925

  Columns 51 through 55

   0.000387419407948   0.000345944773299   0.000308752327060   0.000275390628955   0.000245461162998

  Columns 56 through 60

                   0                   0                   0                   0                   0

  Column 61

                   0


inner_code_BER =

  Columns 1 through 5

   0.085397029963518   0.081516509511755   0.077666073748937   0.073851383502928   0.070078629585463

  Columns 6 through 10

   0.066354498013175   0.062686082308447   0.059080731345821   0.055545827244992   0.052088498064065

  Columns 11 through 15

   0.048715283509483   0.045431785870327   0.042242349098492   0.039149813003319   0.036155385939879

  Columns 16 through 20

   0.033258671000979   0.030457874218112   0.027750227624111   0.025132684367582   0.022602993058709

  Columns 21 through 25

   0.020161325337567   0.017812655048366   0.015569872086364   0.013456730899238   0.011507877720732

  Columns 26 through 30

   0.009761919145368   0.008247345957167   0.006970096541134   0.005912833406342   0.005044491177492

  Columns 31 through 35

   0.004330936809254   0.003741315118494   0.003250227670382   0.002837665247985   0.002488136201551

  Columns 36 through 40

   0.002189684365584   0.001933041847984   0.001710965673467   0.001517739038520   0.001348802157983

  Columns 41 through 45

   0.001200479909453   0.001069780223030   0.000954243818852   0.000851831245595   0.000760837154218

  Columns 46 through 50

   0.000679824605115   0.000607574238297   0.000543044571792   0.000485340709533   0.000433689462925

  Columns 51 through 55

   0.000387419407948   0.000345944773299   0.000308752327060   0.000275390628955   0.000245461162998

  Columns 56 through 60

   0.000218610975659                   0                   0                   0                   0

  Column 61

                   0


inner_code_BER =

  Columns 1 through 5

   0.085397029963518   0.081516509511755   0.077666073748937   0.073851383502928   0.070078629585463

  Columns 6 through 10

   0.066354498013175   0.062686082308447   0.059080731345821   0.055545827244992   0.052088498064065

  Columns 11 through 15

   0.048715283509483   0.045431785870327   0.042242349098492   0.039149813003319   0.036155385939879

  Columns 16 through 20

   0.033258671000979   0.030457874218112   0.027750227624111   0.025132684367582   0.022602993058709

  Columns 21 through 25

   0.020161325337567   0.017812655048366   0.015569872086364   0.013456730899238   0.011507877720732

  Columns 26 through 30

   0.009761919145368   0.008247345957167   0.006970096541134   0.005912833406342   0.005044491177492

  Columns 31 through 35

   0.004330936809254   0.003741315118494   0.003250227670382   0.002837665247985   0.002488136201551

  Columns 36 through 40

   0.002189684365584   0.001933041847984   0.001710965673467   0.001517739038520   0.001348802157983

  Columns 41 through 45

   0.001200479909453   0.001069780223030   0.000954243818852   0.000851831245595   0.000760837154218

  Columns 46 through 50

   0.000679824605115   0.000607574238297   0.000543044571792   0.000485340709533   0.000433689462925

  Columns 51 through 55

   0.000387419407948   0.000345944773299   0.000308752327060   0.000275390628955   0.000245461162998

  Columns 56 through 60

   0.000218610975659   0.000194526527618                   0                   0                   0

  Column 61

                   0


inner_code_BER =

  Columns 1 through 5

   0.085397029963518   0.081516509511755   0.077666073748937   0.073851383502928   0.070078629585463

  Columns 6 through 10

   0.066354498013175   0.062686082308447   0.059080731345821   0.055545827244992   0.052088498064065

  Columns 11 through 15

   0.048715283509483   0.045431785870327   0.042242349098492   0.039149813003319   0.036155385939879

  Columns 16 through 20

   0.033258671000979   0.030457874218112   0.027750227624111   0.025132684367582   0.022602993058709

  Columns 21 through 25

   0.020161325337567   0.017812655048366   0.015569872086364   0.013456730899238   0.011507877720732

  Columns 26 through 30

   0.009761919145368   0.008247345957167   0.006970096541134   0.005912833406342   0.005044491177492

  Columns 31 through 35

   0.004330936809254   0.003741315118494   0.003250227670382   0.002837665247985   0.002488136201551

  Columns 36 through 40

   0.002189684365584   0.001933041847984   0.001710965673467   0.001517739038520   0.001348802157983

  Columns 41 through 45

   0.001200479909453   0.001069780223030   0.000954243818852   0.000851831245595   0.000760837154218

  Columns 46 through 50

   0.000679824605115   0.000607574238297   0.000543044571792   0.000485340709533   0.000433689462925

  Columns 51 through 55

   0.000387419407948   0.000345944773299   0.000308752327060   0.000275390628955   0.000245461162998

  Columns 56 through 60

   0.000218610975659   0.000194526527618   0.000172928530176                   0                   0

  Column 61

                   0


inner_code_BER =

  Columns 1 through 5

   0.085397029963518   0.081516509511755   0.077666073748937   0.073851383502928   0.070078629585463

  Columns 6 through 10

   0.066354498013175   0.062686082308447   0.059080731345821   0.055545827244992   0.052088498064065

  Columns 11 through 15

   0.048715283509483   0.045431785870327   0.042242349098492   0.039149813003319   0.036155385939879

  Columns 16 through 20

   0.033258671000979   0.030457874218112   0.027750227624111   0.025132684367582   0.022602993058709

  Columns 21 through 25

   0.020161325337567   0.017812655048366   0.015569872086364   0.013456730899238   0.011507877720732

  Columns 26 through 30

   0.009761919145368   0.008247345957167   0.006970096541134   0.005912833406342   0.005044491177492

  Columns 31 through 35

   0.004330936809254   0.003741315118494   0.003250227670382   0.002837665247985   0.002488136201551

  Columns 36 through 40

   0.002189684365584   0.001933041847984   0.001710965673467   0.001517739038520   0.001348802157983

  Columns 41 through 45

   0.001200479909453   0.001069780223030   0.000954243818852   0.000851831245595   0.000760837154218

  Columns 46 through 50

   0.000679824605115   0.000607574238297   0.000543044571792   0.000485340709533   0.000433689462925

  Columns 51 through 55

   0.000387419407948   0.000345944773299   0.000308752327060   0.000275390628955   0.000245461162998

  Columns 56 through 60

   0.000218610975659   0.000194526527618   0.000172928530176   0.000153567585482                   0

  Column 61

                   0


inner_code_BER =

  Columns 1 through 5

   0.085397029963518   0.081516509511755   0.077666073748937   0.073851383502928   0.070078629585463

  Columns 6 through 10

   0.066354498013175   0.062686082308447   0.059080731345821   0.055545827244992   0.052088498064065

  Columns 11 through 15

   0.048715283509483   0.045431785870327   0.042242349098492   0.039149813003319   0.036155385939879

  Columns 16 through 20

   0.033258671000979   0.030457874218112   0.027750227624111   0.025132684367582   0.022602993058709

  Columns 21 through 25

   0.020161325337567   0.017812655048366   0.015569872086364   0.013456730899238   0.011507877720732

  Columns 26 through 30

   0.009761919145368   0.008247345957167   0.006970096541134   0.005912833406342   0.005044491177492

  Columns 31 through 35

   0.004330936809254   0.003741315118494   0.003250227670382   0.002837665247985   0.002488136201551

  Columns 36 through 40

   0.002189684365584   0.001933041847984   0.001710965673467   0.001517739038520   0.001348802157983

  Columns 41 through 45

   0.001200479909453   0.001069780223030   0.000954243818852   0.000851831245595   0.000760837154218

  Columns 46 through 50

   0.000679824605115   0.000607574238297   0.000543044571792   0.000485340709533   0.000433689462925

  Columns 51 through 55

   0.000387419407948   0.000345944773299   0.000308752327060   0.000275390628955   0.000245461162998

  Columns 56 through 60

   0.000218610975659   0.000194526527618   0.000172928530176   0.000153567585482   0.000136220486795

  Column 61

                   0


inner_code_BER =

  Columns 1 through 5

   0.085397029963518   0.081516509511755   0.077666073748937   0.073851383502928   0.070078629585463

  Columns 6 through 10

   0.066354498013175   0.062686082308447   0.059080731345821   0.055545827244992   0.052088498064065

  Columns 11 through 15

   0.048715283509483   0.045431785870327   0.042242349098492   0.039149813003319   0.036155385939879

  Columns 16 through 20

   0.033258671000979   0.030457874218112   0.027750227624111   0.025132684367582   0.022602993058709

  Columns 21 through 25

   0.020161325337567   0.017812655048366   0.015569872086364   0.013456730899238   0.011507877720732

  Columns 26 through 30

   0.009761919145368   0.008247345957167   0.006970096541134   0.005912833406342   0.005044491177492

  Columns 31 through 35

   0.004330936809254   0.003741315118494   0.003250227670382   0.002837665247985   0.002488136201551

  Columns 36 through 40

   0.002189684365584   0.001933041847984   0.001710965673467   0.001517739038520   0.001348802157983

  Columns 41 through 45

   0.001200479909453   0.001069780223030   0.000954243818852   0.000851831245595   0.000760837154218

  Columns 46 through 50

   0.000679824605115   0.000607574238297   0.000543044571792   0.000485340709533   0.000433689462925

  Columns 51 through 55

   0.000387419407948   0.000345944773299   0.000308752327060   0.000275390628955   0.000245461162998

  Columns 56 through 60

   0.000218610975659   0.000194526527618   0.000172928530176   0.000153567585482   0.000136220486795

  Column 61

   0.000120687063710

Elapsed time is 27333.059508 seconds.
