# Supplementary material for: An Efficient Design of Systematic Rateless Codes
Source: Hindawi journal article supplement (doi:10.1155/2020/8068414), 2020-05-19
Supplement: f1 [file 8068414.f1.zip › supplementary files/Matlab_code_for_Figure1/BER_by_DDE/仿真结果/BER_by_DDE_awgn_rate_1_2_dist2_Ns.txt]

�ŵ�ΪAWGN�ŵ�

EbN0indB_vec =

  Columns 1 through 5

                   0   0.100000000000000   0.200000000000000   0.300000000000000   0.400000000000000

  Columns 6 through 10

   0.500000000000000   0.600000000000000   0.700000000000000   0.800000000000000   0.900000000000000

  Columns 11 through 15

   1.000000000000000   1.100000000000000   1.200000000000000   1.300000000000000   1.400000000000000

  Columns 16 through 20

   1.500000000000000   1.600000000000000   1.700000000000000   1.800000000000000   1.900000000000000

  Columns 21 through 25

   2.000000000000000   2.100000000000000   2.200000000000000   2.300000000000000   2.400000000000000

  Columns 26 through 30

   2.500000000000000   2.600000000000000   2.700000000000000   2.800000000000000   2.900000000000000

  Columns 31 through 35

   3.000000000000000   3.100000000000000   3.200000000000000   3.300000000000000   3.400000000000000

  Columns 36 through 40

   3.500000000000000   3.600000000000000   3.700000000000000   3.800000000000000   3.900000000000000

  Columns 41 through 45

   4.000000000000000   4.100000000000000   4.200000000000000   4.300000000000000   4.400000000000000

  Columns 46 through 50

   4.500000000000000   4.600000000000000   4.700000000000000   4.800000000000000   4.900000000000000

  Columns 51 through 55

   5.000000000000000   5.100000000000000   5.200000000000000   5.300000000000000   5.400000000000000

  Columns 56 through 60

   5.500000000000000   5.600000000000000   5.700000000000000   5.800000000000000   5.900000000000000

  Column 61

   6.000000000000000

�Ʊ��ɹ�
��ǰѡ��Raptor�뵱ǰѡ���ϵͳ��
������=0.50000, ��������=0.98039, ��������=0.51000

out_node_index =

     1     2     3     8     9    60


ans =

  Columns 1 through 5

   0.004770000000000   0.261010000000000   0.092400000000000   0.069130000000000   0.512230000000000

  Column 6

   0.060460000000000


ans =

  Columns 1 through 5

   0.004770000000000   0.261010000000000   0.092400000000000   0.069130000000000   0.512230000000000

  Column 6

   0.060460000000000


inner_code_BER =

  Columns 1 through 5

   0.489820688674564                   0                   0                   0                   0

  Columns 6 through 10

                   0                   0                   0                   0                   0

  Columns 11 through 15

                   0                   0                   0                   0                   0

  Columns 16 through 20

                   0                   0                   0                   0                   0

  Columns 21 through 25

                   0                   0                   0                   0                   0

  Columns 26 through 30

                   0                   0                   0                   0                   0

  Columns 31 through 35

                   0                   0                   0                   0                   0

  Columns 36 through 40

                   0                   0                   0                   0                   0

  Columns 41 through 45

                   0                   0                   0                   0                   0

  Columns 46 through 50

                   0                   0                   0                   0                   0

  Columns 51 through 55

                   0                   0                   0                   0                   0

  Columns 56 through 60

                   0                   0                   0                   0                   0

  Column 61

                   0


outer_code_BER =

  Columns 1 through 5

   0.489820688674564                   0                   0                   0                   0

  Columns 6 through 10

                   0                   0                   0                   0                   0

  Columns 11 through 15

                   0                   0                   0                   0                   0

  Columns 16 through 20

                   0                   0                   0                   0                   0

  Columns 21 through 25

                   0                   0                   0                   0                   0

  Columns 26 through 30

                   0                   0                   0                   0                   0

  Columns 31 through 35

                   0                   0                   0                   0                   0

  Columns 36 through 40

                   0                   0                   0                   0                   0

  Columns 41 through 45

                   0                   0                   0                   0                   0

  Columns 46 through 50

                   0                   0                   0                   0                   0

  Columns 51 through 55

                   0                   0                   0                   0                   0

  Columns 56 through 60

                   0                   0                   0                   0                   0

  Column 61

                   0


inner_code_BER =

  Columns 1 through 5

   0.489820688674564   0.489549705525477                   0                   0                   0

  Columns 6 through 10

                   0                   0                   0                   0                   0

  Columns 11 through 15

                   0                   0                   0                   0                   0

  Columns 16 through 20

                   0                   0                   0                   0                   0

  Columns 21 through 25

                   0                   0                   0                   0                   0

  Columns 26 through 30

                   0                   0                   0                   0                   0

  Columns 31 through 35

                   0                   0                   0                   0                   0

  Columns 36 through 40

                   0                   0                   0                   0                   0

  Columns 41 through 45

                   0                   0                   0                   0                   0

  Columns 46 through 50

                   0                   0                   0                   0                   0

  Columns 51 through 55

                   0                   0                   0                   0                   0

  Columns 56 through 60

                   0                   0                   0                   0                   0

  Column 61

                   0


outer_code_BER =

  Columns 1 through 5

   0.489820688674564   0.489549705525477                   0                   0                   0

  Columns 6 through 10

                   0                   0                   0                   0                   0

  Columns 11 through 15

                   0                   0                   0                   0                   0

  Columns 16 through 20

                   0                   0                   0                   0                   0

  Columns 21 through 25

                   0                   0                   0                   0                   0

  Columns 26 through 30

                   0                   0                   0                   0                   0

  Columns 31 through 35

                   0                   0                   0                   0                   0

  Columns 36 through 40

                   0                   0                   0                   0                   0

  Columns 41 through 45

                   0                   0                   0                   0                   0

  Columns 46 through 50

                   0                   0                   0                   0                   0

  Columns 51 through 55

                   0                   0                   0                   0                   0

  Columns 56 through 60

                   0                   0                   0                   0                   0

  Column 61

                   0


inner_code_BER =

  Columns 1 through 5

   0.489820688674564   0.489549705525477   0.489268858097167                   0                   0

  Columns 6 through 10

                   0                   0                   0                   0                   0

  Columns 11 through 15

                   0                   0                   0                   0                   0

  Columns 16 through 20

                   0                   0                   0                   0                   0

  Columns 21 through 25

                   0                   0                   0                   0                   0

  Columns 26 through 30

                   0                   0                   0                   0                   0

  Columns 31 through 35

                   0                   0                   0                   0                   0

  Columns 36 through 40

                   0                   0                   0                   0                   0

  Columns 41 through 45

                   0                   0                   0                   0                   0

  Columns 46 through 50

                   0                   0                   0                   0                   0

  Columns 51 through 55

                   0                   0                   0                   0                   0

  Columns 56 through 60

                   0                   0                   0                   0                   0

  Column 61

                   0


outer_code_BER =

  Columns 1 through 5

   0.489820688674564   0.489549705525477   0.489268858097169                   0                   0

  Columns 6 through 10

                   0                   0                   0                   0                   0

  Columns 11 through 15

                   0                   0                   0                   0                   0

  Columns 16 through 20

                   0                   0                   0                   0                   0

  Columns 21 through 25

                   0                   0                   0                   0                   0

  Columns 26 through 30

                   0                   0                   0                   0                   0

  Columns 31 through 35

                   0                   0                   0                   0                   0

  Columns 36 through 40

                   0                   0                   0                   0                   0

  Columns 41 through 45

                   0                   0                   0                   0                   0

  Columns 46 through 50

                   0                   0                   0                   0                   0

  Columns 51 through 55

                   0                   0                   0                   0                   0

  Columns 56 through 60

                   0                   0                   0                   0                   0

  Column 61

                   0


inner_code_BER =

  Columns 1 through 5

   0.489820688674564   0.489549705525477   0.489268858097167   0.488977688247136                   0

  Columns 6 through 10

                   0                   0                   0                   0                   0

  Columns 11 through 15

                   0                   0                   0                   0                   0

  Columns 16 through 20

                   0                   0                   0                   0                   0

  Columns 21 through 25

                   0                   0                   0                   0                   0

  Columns 26 through 30

                   0                   0                   0                   0                   0

  Columns 31 through 35

                   0                   0                   0                   0                   0

  Columns 36 through 40

                   0                   0                   0                   0                   0

  Columns 41 through 45

                   0                   0                   0                   0                   0

  Columns 46 through 50

                   0                   0                   0                   0                   0

  Columns 51 through 55

                   0                   0                   0                   0                   0

  Columns 56 through 60

                   0                   0                   0                   0                   0

  Column 61

                   0


outer_code_BER =

  Columns 1 through 5

   0.489820688674564   0.489549705525477   0.489268858097169   0.488977688247135                   0

  Columns 6 through 10

                   0                   0                   0                   0                   0

  Columns 11 through 15

                   0                   0                   0                   0                   0

  Columns 16 through 20

                   0                   0                   0                   0                   0

  Columns 21 through 25

                   0                   0                   0                   0                   0

  Columns 26 through 30

                   0                   0                   0                   0                   0

  Columns 31 through 35

                   0                   0                   0                   0                   0

  Columns 36 through 40

                   0                   0                   0                   0                   0

  Columns 41 through 45

                   0                   0                   0                   0                   0

  Columns 46 through 50

                   0                   0                   0                   0                   0

  Columns 51 through 55

                   0                   0                   0                   0                   0

  Columns 56 through 60

                   0                   0                   0                   0                   0

  Column 61

                   0


inner_code_BER =

  Columns 1 through 5

   0.489820688674564   0.489549705525477   0.489268858097167   0.488977688247136   0.488675712582701

  Columns 6 through 10

                   0                   0                   0                   0                   0

  Columns 11 through 15

                   0                   0                   0                   0                   0

  Columns 16 through 20

                   0                   0                   0                   0                   0

  Columns 21 through 25

                   0                   0                   0                   0                   0

  Columns 26 through 30

                   0                   0                   0                   0                   0

  Columns 31 through 35

                   0                   0                   0                   0                   0

  Columns 36 through 40

                   0                   0                   0                   0                   0

  Columns 41 through 45

                   0                   0                   0                   0                   0

  Columns 46 through 50

                   0                   0                   0                   0                   0

  Columns 51 through 55

                   0                   0                   0                   0                   0

  Columns 56 through 60

                   0                   0                   0                   0                   0

  Column 61

                   0


outer_code_BER =

  Columns 1 through 5

   0.489820688674564   0.489549705525477   0.489268858097169   0.488977688247135   0.488675712582702

  Columns 6 through 10

                   0                   0                   0                   0                   0

  Columns 11 through 15

                   0                   0                   0                   0                   0

  Columns 16 through 20

                   0                   0                   0                   0                   0

  Columns 21 through 25

                   0                   0                   0                   0                   0

  Columns 26 through 30

                   0                   0                   0                   0                   0

  Columns 31 through 35

                   0                   0                   0                   0                   0

  Columns 36 through 40

                   0                   0                   0                   0                   0

  Columns 41 through 45

                   0                   0                   0                   0                   0

  Columns 46 through 50

                   0                   0                   0                   0                   0

  Columns 51 through 55

                   0                   0                   0                   0                   0

  Columns 56 through 60

                   0                   0                   0                   0                   0

  Column 61

                   0


inner_code_BER =

  Columns 1 through 5

   0.489820688674564   0.489549705525477   0.489268858097167   0.488977688247136   0.488675712582701

  Columns 6 through 10

   0.488362420898951                   0                   0                   0                   0

  Columns 11 through 15

                   0                   0                   0                   0                   0

  Columns 16 through 20

                   0                   0                   0                   0                   0

  Columns 21 through 25

                   0                   0                   0                   0                   0

  Columns 26 through 30

                   0                   0                   0                   0                   0

  Columns 31 through 35

                   0                   0                   0                   0                   0

  Columns 36 through 40

                   0                   0                   0                   0                   0

  Columns 41 through 45

                   0                   0                   0                   0                   0

  Columns 46 through 50

                   0                   0                   0                   0                   0

  Columns 51 through 55

                   0                   0                   0                   0                   0

  Columns 56 through 60

                   0                   0                   0                   0                   0

  Column 61

                   0


outer_code_BER =

  Columns 1 through 5

   0.489820688674564   0.489549705525477   0.489268858097169   0.488977688247135   0.488675712582702

  Columns 6 through 10

   0.488362420898951                   0                   0                   0                   0

  Columns 11 through 15

                   0                   0                   0                   0                   0

  Columns 16 through 20

                   0                   0                   0                   0                   0

  Columns 21 through 25

                   0                   0                   0                   0                   0

  Columns 26 through 30

                   0                   0                   0                   0                   0

  Columns 31 through 35

                   0                   0                   0                   0                   0

  Columns 36 through 40

                   0                   0                   0                   0                   0

  Columns 41 through 45

                   0                   0                   0                   0                   0

  Columns 46 through 50

                   0                   0                   0                   0                   0

  Columns 51 through 55

                   0                   0                   0                   0                   0

  Columns 56 through 60

                   0                   0                   0                   0                   0

  Column 61

                   0


inner_code_BER =

  Columns 1 through 5

   0.489820688674564   0.489549705525477   0.489268858097167   0.488977688247136   0.488675712582701

  Columns 6 through 10

   0.488362420898951   0.488037274512748                   0                   0                   0

  Columns 11 through 15

                   0                   0                   0                   0                   0

  Columns 16 through 20

                   0                   0                   0                   0                   0

  Columns 21 through 25

                   0                   0                   0                   0                   0

  Columns 26 through 30

                   0                   0                   0                   0                   0

  Columns 31 through 35

                   0                   0                   0                   0                   0

  Columns 36 through 40

                   0                   0                   0                   0                   0

  Columns 41 through 45

                   0                   0                   0                   0                   0

  Columns 46 through 50

                   0                   0                   0                   0                   0

  Columns 51 through 55

                   0                   0                   0                   0                   0

  Columns 56 through 60

                   0                   0                   0                   0                   0

  Column 61

                   0


outer_code_BER =

  Columns 1 through 5

   0.489820688674564   0.489549705525477   0.489268858097169   0.488977688247135   0.488675712582702

  Columns 6 through 10

   0.488362420898951   0.488037274512748                   0                   0                   0

  Columns 11 through 15

                   0                   0                   0                   0                   0

  Columns 16 through 20

                   0                   0                   0                   0                   0

  Columns 21 through 25

                   0                   0                   0                   0                   0

  Columns 26 through 30

                   0                   0                   0                   0                   0

  Columns 31 through 35

                   0                   0                   0                   0                   0

  Columns 36 through 40

                   0                   0                   0                   0                   0

  Columns 41 through 45

                   0                   0                   0                   0                   0

  Columns 46 through 50

                   0                   0                   0                   0                   0

  Columns 51 through 55

                   0                   0                   0                   0                   0

  Columns 56 through 60

                   0                   0                   0                   0                   0

  Column 61

                   0


inner_code_BER =

  Columns 1 through 5

   0.489820688674564   0.489549705525477   0.489268858097167   0.488977688247136   0.488675712582701

  Columns 6 through 10

   0.488362420898951   0.488037274512748   0.487699704485605                   0                   0

  Columns 11 through 15

                   0                   0                   0                   0                   0

  Columns 16 through 20

                   0                   0                   0                   0                   0

  Columns 21 through 25

                   0                   0                   0                   0                   0

  Columns 26 through 30

                   0                   0                   0                   0                   0

  Columns 31 through 35

                   0                   0                   0                   0                   0

  Columns 36 through 40

                   0                   0                   0                   0                   0

  Columns 41 through 45

                   0                   0                   0                   0                   0

  Columns 46 through 50

                   0                   0                   0                   0                   0

  Columns 51 through 55

                   0                   0                   0                   0                   0

  Columns 56 through 60

                   0                   0                   0                   0                   0

  Column 61

                   0


outer_code_BER =

  Columns 1 through 5

   0.489820688674564   0.489549705525477   0.489268858097169   0.488977688247135   0.488675712582702

  Columns 6 through 10

   0.488362420898951   0.488037274512748   0.487699704485607                   0                   0

  Columns 11 through 15

                   0                   0                   0                   0                   0

  Columns 16 through 20

                   0                   0                   0                   0                   0

  Columns 21 through 25

                   0                   0                   0                   0                   0

  Columns 26 through 30

                   0                   0                   0                   0                   0

  Columns 31 through 35

                   0                   0                   0                   0                   0

  Columns 36 through 40

                   0                   0                   0                   0                   0

  Columns 41 through 45

                   0                   0                   0                   0                   0

  Columns 46 through 50

                   0                   0                   0                   0                   0

  Columns 51 through 55

                   0                   0                   0                   0                   0

  Columns 56 through 60

                   0                   0                   0                   0                   0

  Column 61

                   0


inner_code_BER =

  Columns 1 through 5

   0.489820688674564   0.489549705525477   0.489268858097167   0.488977688247136   0.488675712582701

  Columns 6 through 10

   0.488362420898951   0.488037274512748   0.487699704485605   0.487349109727696                   0

  Columns 11 through 15

                   0                   0                   0                   0                   0

  Columns 16 through 20

                   0                   0                   0                   0                   0

  Columns 21 through 25

                   0                   0                   0                   0                   0

  Columns 26 through 30

                   0                   0                   0                   0                   0

  Columns 31 through 35

                   0                   0                   0                   0                   0

  Columns 36 through 40

                   0                   0                   0                   0                   0

  Columns 41 through 45

                   0                   0                   0                   0                   0

  Columns 46 through 50

                   0                   0                   0                   0                   0

  Columns 51 through 55

                   0                   0                   0                   0                   0

  Columns 56 through 60

                   0                   0                   0                   0                   0

  Column 61

                   0


outer_code_BER =

  Columns 1 through 5

   0.489820688674564   0.489549705525477   0.489268858097169   0.488977688247135   0.488675712582702

  Columns 6 through 10

   0.488362420898951   0.488037274512748   0.487699704485607   0.487349109727698                   0

  Columns 11 through 15

                   0                   0                   0                   0                   0

  Columns 16 through 20

                   0                   0                   0                   0                   0

  Columns 21 through 25

                   0                   0                   0                   0                   0

  Columns 26 through 30

                   0                   0                   0                   0                   0

  Columns 31 through 35

                   0                   0                   0                   0                   0

  Columns 36 through 40

                   0                   0                   0                   0                   0

  Columns 41 through 45

                   0                   0                   0                   0                   0

  Columns 46 through 50

                   0                   0                   0                   0                   0

  Columns 51 through 55

                   0                   0                   0                   0                   0

  Columns 56 through 60

                   0                   0                   0                   0                   0

  Column 61

                   0


inner_code_BER =

  Columns 1 through 5

   0.489820688674564   0.489549705525477   0.489268858097167   0.488977688247136   0.488675712582701

  Columns 6 through 10

   0.488362420898951   0.488037274512748   0.487699704485605   0.487349109727696   0.486984854974611

  Columns 11 through 15

                   0                   0                   0                   0                   0

  Columns 16 through 20

                   0                   0                   0                   0                   0

  Columns 21 through 25

                   0                   0                   0                   0                   0

  Columns 26 through 30

                   0                   0                   0                   0                   0

  Columns 31 through 35

                   0                   0                   0                   0                   0

  Columns 36 through 40

                   0                   0                   0                   0                   0

  Columns 41 through 45

                   0                   0                   0                   0                   0

  Columns 46 through 50

                   0                   0                   0                   0                   0

  Columns 51 through 55

                   0                   0                   0                   0                   0

  Columns 56 through 60

                   0                   0                   0                   0                   0

  Column 61

                   0


outer_code_BER =

  Columns 1 through 5

   0.489820688674564   0.489549705525477   0.489268858097169   0.488977688247135   0.488675712582702

  Columns 6 through 10

   0.488362420898951   0.488037274512748   0.487699704485607   0.487349109727698   0.486984854974612

  Columns 11 through 15

                   0                   0                   0                   0                   0

  Columns 16 through 20

                   0                   0                   0                   0                   0

  Columns 21 through 25

                   0                   0                   0                   0                   0

  Columns 26 through 30

                   0                   0                   0                   0                   0

  Columns 31 through 35

                   0                   0                   0                   0                   0

  Columns 36 through 40

                   0                   0                   0                   0                   0

  Columns 41 through 45

                   0                   0                   0                   0                   0

  Columns 46 through 50

                   0                   0                   0                   0                   0

  Columns 51 through 55

                   0                   0                   0                   0                   0

  Columns 56 through 60

                   0                   0                   0                   0                   0

  Column 61

                   0


inner_code_BER =

  Columns 1 through 5

   0.489820688674564   0.489549705525477   0.489268858097167   0.488977688247136   0.488675712582701

  Columns 6 through 10

   0.488362420898951   0.488037274512748   0.487699704485605   0.487349109727696   0.486984854974611

  Columns 11 through 15

   0.486606268627968                   0                   0                   0                   0

  Columns 16 through 20

                   0                   0                   0                   0                   0

  Columns 21 through 25

                   0                   0                   0                   0                   0

  Columns 26 through 30

                   0                   0                   0                   0                   0

  Columns 31 through 35

                   0                   0                   0                   0                   0

  Columns 36 through 40

                   0                   0                   0                   0                   0

  Columns 41 through 45

                   0                   0                   0                   0                   0

  Columns 46 through 50

                   0                   0                   0                   0                   0

  Columns 51 through 55

                   0                   0                   0                   0                   0

  Columns 56 through 60

                   0                   0                   0                   0                   0

  Column 61

                   0


outer_code_BER =

  Columns 1 through 5

   0.489820688674564   0.489549705525477   0.489268858097169   0.488977688247135   0.488675712582702

  Columns 6 through 10

   0.488362420898951   0.488037274512748   0.487699704485607   0.487349109727698   0.486984854974612

  Columns 11 through 15

   0.486606268627969                   0                   0                   0                   0

  Columns 16 through 20

                   0                   0                   0                   0                   0

  Columns 21 through 25

                   0                   0                   0                   0                   0

  Columns 26 through 30

                   0                   0                   0                   0                   0

  Columns 31 through 35

                   0                   0                   0                   0                   0

  Columns 36 through 40

                   0                   0                   0                   0                   0

  Columns 41 through 45

                   0                   0                   0                   0                   0

  Columns 46 through 50

                   0                   0                   0                   0                   0

  Columns 51 through 55

                   0                   0                   0                   0                   0

  Columns 56 through 60

                   0                   0                   0                   0                   0

  Column 61

                   0


inner_code_BER =

  Columns 1 through 5

   0.489820688674564   0.489549705525477   0.489268858097167   0.488977688247136   0.488675712582701

  Columns 6 through 10

   0.488362420898951   0.488037274512748   0.487699704485605   0.487349109727696   0.486984854974611

  Columns 11 through 15

   0.486606268627968   0.486212640450258                   0                   0                   0

  Columns 16 through 20

                   0                   0                   0                   0                   0

  Columns 21 through 25

                   0                   0                   0                   0                   0

  Columns 26 through 30

                   0                   0                   0                   0                   0

  Columns 31 through 35

                   0                   0                   0                   0                   0

  Columns 36 through 40

                   0                   0                   0                   0                   0

  Columns 41 through 45

                   0                   0                   0                   0                   0

  Columns 46 through 50

                   0                   0                   0                   0                   0

  Columns 51 through 55

                   0                   0                   0                   0                   0

  Columns 56 through 60

                   0                   0                   0                   0                   0

  Column 61

                   0


outer_code_BER =

  Columns 1 through 5

   0.489820688674564   0.489549705525477   0.489268858097169   0.488977688247135   0.488675712582702

  Columns 6 through 10

   0.488362420898951   0.488037274512748   0.487699704485607   0.487349109727698   0.486984854974612

  Columns 11 through 15

   0.486606268627969   0.486212640450258                   0                   0                   0

  Columns 16 through 20

                   0                   0                   0                   0                   0

  Columns 21 through 25

                   0                   0                   0                   0                   0

  Columns 26 through 30

                   0                   0                   0                   0                   0

  Columns 31 through 35

                   0                   0                   0                   0                   0

  Columns 36 through 40

                   0                   0                   0                   0                   0

  Columns 41 through 45

                   0                   0                   0                   0                   0

  Columns 46 through 50

                   0                   0                   0                   0                   0

  Columns 51 through 55

                   0                   0                   0                   0                   0

  Columns 56 through 60

                   0                   0                   0                   0                   0

  Column 61

                   0


inner_code_BER =

  Columns 1 through 5

   0.489820688674564   0.489549705525477   0.489268858097167   0.488977688247136   0.488675712582701

  Columns 6 through 10

   0.488362420898951   0.488037274512748   0.487699704485605   0.487349109727696   0.486984854974611

  Columns 11 through 15

   0.486606268627968   0.486212640450258   0.485803219103447                   0                   0

  Columns 16 through 20

                   0                   0                   0                   0                   0

  Columns 21 through 25

                   0                   0                   0                   0                   0

  Columns 26 through 30

                   0                   0                   0                   0                   0

  Columns 31 through 35

                   0                   0                   0                   0                   0

  Columns 36 through 40

                   0                   0                   0                   0                   0

  Columns 41 through 45

                   0                   0                   0                   0                   0

  Columns 46 through 50

                   0                   0                   0                   0                   0

  Columns 51 through 55

                   0                   0                   0                   0                   0

  Columns 56 through 60

                   0                   0                   0                   0                   0

  Column 61

                   0


outer_code_BER =

  Columns 1 through 5

   0.489820688674564   0.489549705525477   0.489268858097169   0.488977688247135   0.488675712582702

  Columns 6 through 10

   0.488362420898951   0.488037274512748   0.487699704485607   0.487349109727698   0.486984854974612

  Columns 11 through 15

   0.486606268627969   0.486212640450258   0.485803219103448                   0                   0

  Columns 16 through 20

                   0                   0                   0                   0                   0

  Columns 21 through 25

                   0                   0                   0                   0                   0

  Columns 26 through 30

                   0                   0                   0                   0                   0

  Columns 31 through 35

                   0                   0                   0                   0                   0

  Columns 36 through 40

                   0                   0                   0                   0                   0

  Columns 41 through 45

                   0                   0                   0                   0                   0

  Columns 46 through 50

                   0                   0                   0                   0                   0

  Columns 51 through 55

                   0                   0                   0                   0                   0

  Columns 56 through 60

                   0                   0                   0                   0                   0

  Column 61

                   0


inner_code_BER =

  Columns 1 through 5

   0.489820688674564   0.489549705525477   0.489268858097167   0.488977688247136   0.488675712582701

  Columns 6 through 10

   0.488362420898951   0.488037274512748   0.487699704485605   0.487349109727696   0.486984854974611

  Columns 11 through 15

   0.486606268627968   0.486212640450258   0.485803219103447   0.485377209520252                   0

  Columns 16 through 20

                   0                   0                   0                   0                   0

  Columns 21 through 25

                   0                   0                   0                   0                   0

  Columns 26 through 30

                   0                   0                   0                   0                   0

  Columns 31 through 35

                   0                   0                   0                   0                   0

  Columns 36 through 40

                   0                   0                   0                   0                   0

  Columns 41 through 45

                   0                   0                   0                   0                   0

  Columns 46 through 50

                   0                   0                   0                   0                   0

  Columns 51 through 55

                   0                   0                   0                   0                   0

  Columns 56 through 60

                   0                   0                   0                   0                   0

  Column 61

                   0


outer_code_BER =

  Columns 1 through 5

   0.489820688674564   0.489549705525477   0.489268858097169   0.488977688247135   0.488675712582702

  Columns 6 through 10

   0.488362420898951   0.488037274512748   0.487699704485607   0.487349109727698   0.486984854974612

  Columns 11 through 15

   0.486606268627969   0.486212640450258   0.485803219103448   0.485377209520253                   0

  Columns 16 through 20

                   0                   0                   0                   0                   0

  Columns 21 through 25

                   0                   0                   0                   0                   0

  Columns 26 through 30

                   0                   0                   0                   0                   0

  Columns 31 through 35

                   0                   0                   0                   0                   0

  Columns 36 through 40

                   0                   0                   0                   0                   0

  Columns 41 through 45

                   0                   0                   0                   0                   0

  Columns 46 through 50

                   0                   0                   0                   0                   0

  Columns 51 through 55

                   0                   0                   0                   0                   0

  Columns 56 through 60

                   0                   0                   0                   0                   0

  Column 61

                   0


inner_code_BER =

  Columns 1 through 5

   0.489820688674564   0.489549705525477   0.489268858097167   0.488977688247136   0.488675712582701

  Columns 6 through 10

   0.488362420898951   0.488037274512748   0.487699704485605   0.487349109727696   0.486984854974611

  Columns 11 through 15

   0.486606268627968   0.486212640450258   0.485803219103447   0.485377209520252   0.484933770095925

  Columns 16 through 20

                   0                   0                   0                   0                   0

  Columns 21 through 25

                   0                   0                   0                   0                   0

  Columns 26 through 30

                   0                   0                   0                   0                   0

  Columns 31 through 35

                   0                   0                   0                   0                   0

  Columns 36 through 40

                   0                   0                   0                   0                   0

  Columns 41 through 45

                   0                   0                   0                   0                   0

  Columns 46 through 50

                   0                   0                   0                   0                   0

  Columns 51 through 55

                   0                   0                   0                   0                   0

  Columns 56 through 60

                   0                   0                   0                   0                   0

  Column 61

                   0


outer_code_BER =

  Columns 1 through 5

   0.489820688674564   0.489549705525477   0.489268858097169   0.488977688247135   0.488675712582702

  Columns 6 through 10

   0.488362420898951   0.488037274512748   0.487699704485607   0.487349109727698   0.486984854974612

  Columns 11 through 15

   0.486606268627969   0.486212640450258   0.485803219103448   0.485377209520253   0.484933770095926

  Columns 16 through 20

                   0                   0                   0                   0                   0

  Columns 21 through 25

                   0                   0                   0                   0                   0

  Columns 26 through 30

                   0                   0                   0                   0                   0

  Columns 31 through 35

                   0                   0                   0                   0                   0

  Columns 36 through 40

                   0                   0                   0                   0                   0

  Columns 41 through 45

                   0                   0                   0                   0                   0

  Columns 46 through 50

                   0                   0                   0                   0                   0

  Columns 51 through 55

                   0                   0                   0                   0                   0

  Columns 56 through 60

                   0                   0                   0                   0                   0

  Column 61

                   0


inner_code_BER =

  Columns 1 through 5

   0.489820688674564   0.489549705525477   0.489268858097167   0.488977688247136   0.488675712582701

  Columns 6 through 10

   0.488362420898951   0.488037274512748   0.487699704485605   0.487349109727696   0.486984854974611

  Columns 11 through 15

   0.486606268627968   0.486212640450258   0.485803219103447   0.485377209520252   0.484933770095925

  Columns 16 through 20

   0.484472009687414                   0                   0                   0                   0

  Columns 21 through 25

                   0                   0                   0                   0                   0

  Columns 26 through 30

                   0                   0                   0                   0                   0

  Columns 31 through 35

                   0                   0                   0                   0                   0

  Columns 36 through 40

                   0                   0                   0                   0                   0

  Columns 41 through 45

                   0                   0                   0                   0                   0

  Columns 46 through 50

                   0                   0                   0                   0                   0

  Columns 51 through 55

                   0                   0                   0                   0                   0

  Columns 56 through 60

                   0                   0                   0                   0                   0

  Column 61

                   0


outer_code_BER =

  Columns 1 through 5

   0.489820688674564   0.489549705525477   0.489268858097169   0.488977688247135   0.488675712582702

  Columns 6 through 10

   0.488362420898951   0.488037274512748   0.487699704485607   0.487349109727698   0.486984854974612

  Columns 11 through 15

   0.486606268627969   0.486212640450258   0.485803219103448   0.485377209520253   0.484933770095926

  Columns 16 through 20

   0.484472009687414                   0                   0                   0                   0

  Columns 21 through 25

                   0                   0                   0                   0                   0

  Columns 26 through 30

                   0                   0                   0                   0                   0

  Columns 31 through 35

                   0                   0                   0                   0                   0

  Columns 36 through 40

                   0                   0                   0                   0                   0

  Columns 41 through 45

                   0                   0                   0                   0                   0

  Columns 46 through 50

                   0                   0                   0                   0                   0

  Columns 51 through 55

                   0                   0                   0                   0                   0

  Columns 56 through 60

                   0                   0                   0                   0                   0

  Column 61

                   0


inner_code_BER =

  Columns 1 through 5

   0.489820688674564   0.489549705525477   0.489268858097167   0.488977688247136   0.488675712582701

  Columns 6 through 10

   0.488362420898951   0.488037274512748   0.487699704485605   0.487349109727696   0.486984854974611

  Columns 11 through 15

   0.486606268627968   0.486212640450258   0.485803219103447   0.485377209520252   0.484933770095925

  Columns 16 through 20

   0.484472009687414   0.483990984405784                   0                   0                   0

  Columns 21 through 25

                   0                   0                   0                   0                   0

  Columns 26 through 30

                   0                   0                   0                   0                   0

  Columns 31 through 35

                   0                   0                   0                   0                   0

  Columns 36 through 40

                   0                   0                   0                   0                   0

  Columns 41 through 45

                   0                   0                   0                   0                   0

  Columns 46 through 50

                   0                   0                   0                   0                   0

  Columns 51 through 55

                   0                   0                   0                   0                   0

  Columns 56 through 60

                   0                   0                   0                   0                   0

  Column 61

                   0


outer_code_BER =

  Columns 1 through 5

   0.489820688674564   0.489549705525477   0.489268858097169   0.488977688247135   0.488675712582702

  Columns 6 through 10

   0.488362420898951   0.488037274512748   0.487699704485607   0.487349109727698   0.486984854974612

  Columns 11 through 15

   0.486606268627969   0.486212640450258   0.485803219103448   0.485377209520253   0.484933770095926

  Columns 16 through 20

   0.484472009687414   0.483990984405785                   0                   0                   0

  Columns 21 through 25

                   0                   0                   0                   0                   0

  Columns 26 through 30

                   0                   0                   0                   0                   0

  Columns 31 through 35

                   0                   0                   0                   0                   0

  Columns 36 through 40

                   0                   0                   0                   0                   0

  Columns 41 through 45

                   0                   0                   0                   0                   0

  Columns 46 through 50

                   0                   0                   0                   0                   0

  Columns 51 through 55

                   0                   0                   0                   0                   0

  Columns 56 through 60

                   0                   0                   0                   0                   0

  Column 61

                   0


inner_code_BER =

  Columns 1 through 5

   0.489820688674564   0.489549705525477   0.489268858097167   0.488977688247136   0.488675712582701

  Columns 6 through 10

   0.488362420898951   0.488037274512748   0.487699704485605   0.487349109727696   0.486984854974611

  Columns 11 through 15

   0.486606268627968   0.486212640450258   0.485803219103447   0.485377209520252   0.484933770095925

  Columns 16 through 20

   0.484472009687414   0.483990984405784   0.483489694186365                   0                   0

  Columns 21 through 25

                   0                   0                   0                   0                   0

  Columns 26 through 30

                   0                   0                   0                   0                   0

  Columns 31 through 35

                   0                   0                   0                   0                   0

  Columns 36 through 40

                   0                   0                   0                   0                   0

  Columns 41 through 45

                   0                   0                   0                   0                   0

  Columns 46 through 50

                   0                   0                   0                   0                   0

  Columns 51 through 55

                   0                   0                   0                   0                   0

  Columns 56 through 60

                   0                   0                   0                   0                   0

  Column 61

                   0


outer_code_BER =

  Columns 1 through 5

   0.489820688674564   0.489549705525477   0.489268858097169   0.488977688247135   0.488675712582702

  Columns 6 through 10

   0.488362420898951   0.488037274512748   0.487699704485607   0.487349109727698   0.486984854974612

  Columns 11 through 15

   0.486606268627969   0.486212640450258   0.485803219103448   0.485377209520253   0.484933770095926

  Columns 16 through 20

   0.484472009687414   0.483990984405785   0.483489694186365                   0                   0

  Columns 21 through 25

                   0                   0                   0                   0                   0

  Columns 26 through 30

                   0                   0                   0                   0                   0

  Columns 31 through 35

                   0                   0                   0                   0                   0

  Columns 36 through 40

                   0                   0                   0                   0                   0

  Columns 41 through 45

                   0                   0                   0                   0                   0

  Columns 46 through 50

                   0                   0                   0                   0                   0

  Columns 51 through 55

                   0                   0                   0                   0                   0

  Columns 56 through 60

                   0                   0                   0                   0                   0

  Column 61

                   0


inner_code_BER =

  Columns 1 through 5

   0.489820688674564   0.489549705525477   0.489268858097167   0.488977688247136   0.488675712582701

  Columns 6 through 10

   0.488362420898951   0.488037274512748   0.487699704485605   0.487349109727696   0.486984854974611

  Columns 11 through 15

   0.486606268627968   0.486212640450258   0.485803219103447   0.485377209520252   0.484933770095925

  Columns 16 through 20

   0.484472009687414   0.483990984405784   0.483489694186365   0.482967079119920                   0

  Columns 21 through 25

                   0                   0                   0                   0                   0

  Columns 26 through 30

                   0                   0                   0                   0                   0

  Columns 31 through 35

                   0                   0                   0                   0                   0

  Columns 36 through 40

                   0                   0                   0                   0                   0

  Columns 41 through 45

                   0                   0                   0                   0                   0

  Columns 46 through 50

                   0                   0                   0                   0                   0

  Columns 51 through 55

                   0                   0                   0                   0                   0

  Columns 56 through 60

                   0                   0                   0                   0                   0

  Column 61

                   0


outer_code_BER =

  Columns 1 through 5

   0.489820688674564   0.489549705525477   0.489268858097169   0.488977688247135   0.488675712582702

  Columns 6 through 10

   0.488362420898951   0.488037274512748   0.487699704485607   0.487349109727698   0.486984854974612

  Columns 11 through 15

   0.486606268627969   0.486212640450258   0.485803219103448   0.485377209520253   0.484933770095926

  Columns 16 through 20

   0.484472009687414   0.483990984405785   0.483489694186365   0.482967079119922                   0

  Columns 21 through 25

                   0                   0                   0                   0                   0

  Columns 26 through 30

                   0                   0                   0                   0                   0

  Columns 31 through 35

                   0                   0                   0                   0                   0

  Columns 36 through 40

                   0                   0                   0                   0                   0

  Columns 41 through 45

                   0                   0                   0                   0                   0

  Columns 46 through 50

                   0                   0                   0                   0                   0

  Columns 51 through 55

                   0                   0                   0                   0                   0

  Columns 56 through 60

                   0                   0                   0                   0                   0

  Column 61

                   0


inner_code_BER =

  Columns 1 through 5

   0.489820688674564   0.489549705525477   0.489268858097167   0.488977688247136   0.488675712582701

  Columns 6 through 10

   0.488362420898951   0.488037274512748   0.487699704485605   0.487349109727696   0.486984854974611

  Columns 11 through 15

   0.486606268627968   0.486212640450258   0.485803219103447   0.485377209520252   0.484933770095925

  Columns 16 through 20

   0.484472009687414   0.483990984405784   0.483489694186365   0.482967079119920   0.482422015526537

  Columns 21 through 25

                   0                   0                   0                   0                   0

  Columns 26 through 30

                   0                   0                   0                   0                   0

  Columns 31 through 35

                   0                   0                   0                   0                   0

  Columns 36 through 40

                   0                   0                   0                   0                   0

  Columns 41 through 45

                   0                   0                   0                   0                   0

  Columns 46 through 50

                   0                   0                   0                   0                   0

  Columns 51 through 55

                   0                   0                   0                   0                   0

  Columns 56 through 60

                   0                   0                   0                   0                   0

  Column 61

                   0


outer_code_BER =

  Columns 1 through 5

   0.489820688674564   0.489549705525477   0.489268858097169   0.488977688247135   0.488675712582702

  Columns 6 through 10

   0.488362420898951   0.488037274512748   0.487699704485607   0.487349109727698   0.486984854974612

  Columns 11 through 15

   0.486606268627969   0.486212640450258   0.485803219103448   0.485377209520253   0.484933770095926

  Columns 16 through 20

   0.484472009687414   0.483990984405785   0.483489694186365   0.482967079119922   0.482422015526536

  Columns 21 through 25

                   0                   0                   0                   0                   0

  Columns 26 through 30

                   0                   0                   0                   0                   0

  Columns 31 through 35

                   0                   0                   0                   0                   0

  Columns 36 through 40

                   0                   0                   0                   0                   0

  Columns 41 through 45

                   0                   0                   0                   0                   0

  Columns 46 through 50

                   0                   0                   0                   0                   0

  Columns 51 through 55

                   0                   0                   0                   0                   0

  Columns 56 through 60

                   0                   0                   0                   0                   0

  Column 61

                   0


inner_code_BER =

  Columns 1 through 5

   0.489820688674564   0.489549705525477   0.489268858097167   0.488977688247136   0.488675712582701

  Columns 6 through 10

   0.488362420898951   0.488037274512748   0.487699704485605   0.487349109727696   0.486984854974611

  Columns 11 through 15

   0.486606268627968   0.486212640450258   0.485803219103447   0.485377209520252   0.484933770095925

  Columns 16 through 20

   0.484472009687414   0.483990984405784   0.483489694186365   0.482967079119920   0.482422015526537

  Columns 21 through 25

   0.481853311752198                   0                   0                   0                   0

  Columns 26 through 30

                   0                   0                   0                   0                   0

  Columns 31 through 35

                   0                   0                   0                   0                   0

  Columns 36 through 40

                   0                   0                   0                   0                   0

  Columns 41 through 45

                   0                   0                   0                   0                   0

  Columns 46 through 50

                   0                   0                   0                   0                   0

  Columns 51 through 55

                   0                   0                   0                   0                   0

  Columns 56 through 60

                   0                   0                   0                   0                   0

  Column 61

                   0


outer_code_BER =

  Columns 1 through 5

   0.489820688674564   0.489549705525477   0.489268858097169   0.488977688247135   0.488675712582702

  Columns 6 through 10

   0.488362420898951   0.488037274512748   0.487699704485607   0.487349109727698   0.486984854974612

  Columns 11 through 15

   0.486606268627969   0.486212640450258   0.485803219103448   0.485377209520253   0.484933770095926

  Columns 16 through 20

   0.484472009687414   0.483990984405785   0.483489694186365   0.482967079119922   0.482422015526536

  Columns 21 through 25

   0.481853311752198                   0                   0                   0                   0

  Columns 26 through 30

                   0                   0                   0                   0                   0

  Columns 31 through 35

                   0                   0                   0                   0                   0

  Columns 36 through 40

                   0                   0                   0                   0                   0

  Columns 41 through 45

                   0                   0                   0                   0                   0

  Columns 46 through 50

                   0                   0                   0                   0                   0

  Columns 51 through 55

                   0                   0                   0                   0                   0

  Columns 56 through 60

                   0                   0                   0                   0                   0

  Column 61

                   0


inner_code_BER =

  Columns 1 through 5

   0.489820688674564   0.489549705525477   0.489268858097167   0.488977688247136   0.488675712582701

  Columns 6 through 10

   0.488362420898951   0.488037274512748   0.487699704485605   0.487349109727696   0.486984854974611

  Columns 11 through 15

   0.486606268627968   0.486212640450258   0.485803219103447   0.485377209520252   0.484933770095925

  Columns 16 through 20

   0.484472009687414   0.483990984405784   0.483489694186365   0.482967079119920   0.482422015526537

  Columns 21 through 25

   0.481853311752198   0.481259703666381                   0                   0                   0

  Columns 26 through 30

                   0                   0                   0                   0                   0

  Columns 31 through 35

                   0                   0                   0                   0                   0

  Columns 36 through 40

                   0                   0                   0                   0                   0

  Columns 41 through 45

                   0                   0                   0                   0                   0

  Columns 46 through 50

                   0                   0                   0                   0                   0

  Columns 51 through 55

                   0                   0                   0                   0                   0

  Columns 56 through 60

                   0                   0                   0                   0                   0

  Column 61

                   0


outer_code_BER =

  Columns 1 through 5

   0.489820688674564   0.489549705525477   0.489268858097169   0.488977688247135   0.488675712582702

  Columns 6 through 10

   0.488362420898951   0.488037274512748   0.487699704485607   0.487349109727698   0.486984854974612

  Columns 11 through 15

   0.486606268627969   0.486212640450258   0.485803219103448   0.485377209520253   0.484933770095926

  Columns 16 through 20

   0.484472009687414   0.483990984405785   0.483489694186365   0.482967079119922   0.482422015526536

  Columns 21 through 25

   0.481853311752198   0.481259703666382                   0                   0                   0

  Columns 26 through 30

                   0                   0                   0                   0                   0

  Columns 31 through 35

                   0                   0                   0                   0                   0

  Columns 36 through 40

                   0                   0                   0                   0                   0

  Columns 41 through 45

                   0                   0                   0                   0                   0

  Columns 46 through 50

                   0                   0                   0                   0                   0

  Columns 51 through 55

                   0                   0                   0                   0                   0

  Columns 56 through 60

                   0                   0                   0                   0                   0

  Column 61

                   0


inner_code_BER =

  Columns 1 through 5

   0.489820688674564   0.489549705525477   0.489268858097167   0.488977688247136   0.488675712582701

  Columns 6 through 10

   0.488362420898951   0.488037274512748   0.487699704485605   0.487349109727696   0.486984854974611

  Columns 11 through 15

   0.486606268627968   0.486212640450258   0.485803219103447   0.485377209520252   0.484933770095925

  Columns 16 through 20

   0.484472009687414   0.483990984405784   0.483489694186365   0.482967079119920   0.482422015526537

  Columns 21 through 25

   0.481853311752198   0.481259703666381   0.480639849836700                   0                   0

  Columns 26 through 30

                   0                   0                   0                   0                   0

  Columns 31 through 35

                   0                   0                   0                   0                   0

  Columns 36 through 40

                   0                   0                   0                   0                   0

  Columns 41 through 45

                   0                   0                   0                   0                   0

  Columns 46 through 50

                   0                   0                   0                   0                   0

  Columns 51 through 55

                   0                   0                   0                   0                   0

  Columns 56 through 60

                   0                   0                   0                   0                   0

  Column 61

                   0


outer_code_BER =

  Columns 1 through 5

   0.489820688674564   0.489549705525477   0.489268858097169   0.488977688247135   0.488675712582702

  Columns 6 through 10

   0.488362420898951   0.488037274512748   0.487699704485607   0.487349109727698   0.486984854974612

  Columns 11 through 15

   0.486606268627969   0.486212640450258   0.485803219103448   0.485377209520253   0.484933770095926

  Columns 16 through 20

   0.484472009687414   0.483990984405785   0.483489694186365   0.482967079119922   0.482422015526536

  Columns 21 through 25

   0.481853311752198   0.481259703666382   0.480639849836701                   0                   0

  Columns 26 through 30

                   0                   0                   0                   0                   0

  Columns 31 through 35

                   0                   0                   0                   0                   0

  Columns 36 through 40

                   0                   0                   0                   0                   0

  Columns 41 through 45

                   0                   0                   0                   0                   0

  Columns 46 through 50

                   0                   0                   0                   0                   0

  Columns 51 through 55

                   0                   0                   0                   0                   0

  Columns 56 through 60

                   0                   0                   0                   0                   0

  Column 61

                   0


inner_code_BER =

  Columns 1 through 5

   0.489820688674564   0.489549705525477   0.489268858097167   0.488977688247136   0.488675712582701

  Columns 6 through 10

   0.488362420898951   0.488037274512748   0.487699704485605   0.487349109727696   0.486984854974611

  Columns 11 through 15

   0.486606268627968   0.486212640450258   0.485803219103447   0.485377209520252   0.484933770095925

  Columns 16 through 20

   0.484472009687414   0.483990984405784   0.483489694186365   0.482967079119920   0.482422015526537

  Columns 21 through 25

   0.481853311752198   0.481259703666381   0.480639849836700   0.479992326354637                   0

  Columns 26 through 30

                   0                   0                   0                   0                   0

  Columns 31 through 35

                   0                   0                   0                   0                   0

  Columns 36 through 40

                   0                   0                   0                   0                   0

  Columns 41 through 45

                   0                   0                   0                   0                   0

  Columns 46 through 50

                   0                   0                   0                   0                   0

  Columns 51 through 55

                   0                   0                   0                   0                   0

  Columns 56 through 60

                   0                   0                   0                   0                   0

  Column 61

                   0


outer_code_BER =

  Columns 1 through 5

   0.489820688674564   0.489549705525477   0.489268858097169   0.488977688247135   0.488675712582702

  Columns 6 through 10

   0.488362420898951   0.488037274512748   0.487699704485607   0.487349109727698   0.486984854974612

  Columns 11 through 15

   0.486606268627969   0.486212640450258   0.485803219103448   0.485377209520253   0.484933770095926

  Columns 16 through 20

   0.484472009687414   0.483990984405785   0.483489694186365   0.482967079119922   0.482422015526536

  Columns 21 through 25

   0.481853311752198   0.481259703666382   0.480639849836701   0.479992326354637                   0

  Columns 26 through 30

                   0                   0                   0                   0                   0

  Columns 31 through 35

                   0                   0                   0                   0                   0

  Columns 36 through 40

                   0                   0                   0                   0                   0

  Columns 41 through 45

                   0                   0                   0                   0                   0

  Columns 46 through 50

                   0                   0                   0                   0                   0

  Columns 51 through 55

                   0                   0                   0                   0                   0

  Columns 56 through 60

                   0                   0                   0                   0                   0

  Column 61

                   0


inner_code_BER =

  Columns 1 through 5

   0.489820688674564   0.489549705525477   0.489268858097167   0.488977688247136   0.488675712582701

  Columns 6 through 10

   0.488362420898951   0.488037274512748   0.487699704485605   0.487349109727696   0.486984854974611

  Columns 11 through 15

   0.486606268627968   0.486212640450258   0.485803219103447   0.485377209520252   0.484933770095925

  Columns 16 through 20

   0.484472009687414   0.483990984405784   0.483489694186365   0.482967079119920   0.482422015526537

  Columns 21 through 25

   0.481853311752198   0.481259703666381   0.480639849836700   0.479992326354637   0.479315621283799

  Columns 26 through 30

                   0                   0                   0                   0                   0

  Columns 31 through 35

                   0                   0                   0                   0                   0

  Columns 36 through 40

                   0                   0                   0                   0                   0

  Columns 41 through 45

                   0                   0                   0                   0                   0

  Columns 46 through 50

                   0                   0                   0                   0                   0

  Columns 51 through 55

                   0                   0                   0                   0                   0

  Columns 56 through 60

                   0                   0                   0                   0                   0

  Column 61

                   0


outer_code_BER =

  Columns 1 through 5

   0.489820688674564   0.489549705525477   0.489268858097169   0.488977688247135   0.488675712582702

  Columns 6 through 10

   0.488362420898951   0.488037274512748   0.487699704485607   0.487349109727698   0.486984854974612

  Columns 11 through 15

   0.486606268627969   0.486212640450258   0.485803219103448   0.485377209520253   0.484933770095926

  Columns 16 through 20

   0.484472009687414   0.483990984405785   0.483489694186365   0.482967079119922   0.482422015526536

  Columns 21 through 25

   0.481853311752198   0.481259703666382   0.480639849836701   0.479992326354637   0.479315621283799

  Columns 26 through 30

                   0                   0                   0                   0                   0

  Columns 31 through 35

                   0                   0                   0                   0                   0

  Columns 36 through 40

                   0                   0                   0                   0                   0

  Columns 41 through 45

                   0                   0                   0                   0                   0

  Columns 46 through 50

                   0                   0                   0                   0                   0

  Columns 51 through 55

                   0                   0                   0                   0                   0

  Columns 56 through 60

                   0                   0                   0                   0                   0

  Column 61

                   0


inner_code_BER =

  Columns 1 through 5

   0.489820688674564   0.489549705525477   0.489268858097167   0.488977688247136   0.488675712582701

  Columns 6 through 10

   0.488362420898951   0.488037274512748   0.487699704485605   0.487349109727696   0.486984854974611

  Columns 11 through 15

   0.486606268627968   0.486212640450258   0.485803219103447   0.485377209520252   0.484933770095925

  Columns 16 through 20

   0.484472009687414   0.483990984405784   0.483489694186365   0.482967079119920   0.482422015526537

  Columns 21 through 25

   0.481853311752198   0.481259703666381   0.480639849836700   0.479992326354637   0.479315621283799

  Columns 26 through 30

   0.478608128699700                   0                   0                   0                   0

  Columns 31 through 35

                   0                   0                   0                   0                   0

  Columns 36 through 40

                   0                   0                   0                   0                   0

  Columns 41 through 45

                   0                   0                   0                   0                   0

  Columns 46 through 50

                   0                   0                   0                   0                   0

  Columns 51 through 55

                   0                   0                   0                   0                   0

  Columns 56 through 60

                   0                   0                   0                   0                   0

  Column 61

                   0


outer_code_BER =

  Columns 1 through 5

   0.489820688674564   0.489549705525477   0.489268858097169   0.488977688247135   0.488675712582702

  Columns 6 through 10

   0.488362420898951   0.488037274512748   0.487699704485607   0.487349109727698   0.486984854974612

  Columns 11 through 15

   0.486606268627969   0.486212640450258   0.485803219103448   0.485377209520253   0.484933770095926

  Columns 16 through 20

   0.484472009687414   0.483990984405785   0.483489694186365   0.482967079119922   0.482422015526536

  Columns 21 through 25

   0.481853311752198   0.481259703666382   0.480639849836701   0.479992326354637   0.479315621283799

  Columns 26 through 30

   0.478608128699701                   0                   0                   0                   0

  Columns 31 through 35

                   0                   0                   0                   0                   0

  Columns 36 through 40

                   0                   0                   0                   0                   0

  Columns 41 through 45

                   0                   0                   0                   0                   0

  Columns 46 through 50

                   0                   0                   0                   0                   0

  Columns 51 through 55

                   0                   0                   0                   0                   0

  Columns 56 through 60

                   0                   0                   0                   0                   0

  Column 61

                   0


inner_code_BER =

  Columns 1 through 5

   0.489820688674564   0.489549705525477   0.489268858097167   0.488977688247136   0.488675712582701

  Columns 6 through 10

   0.488362420898951   0.488037274512748   0.487699704485605   0.487349109727696   0.486984854974611

  Columns 11 through 15

   0.486606268627968   0.486212640450258   0.485803219103447   0.485377209520252   0.484933770095925

  Columns 16 through 20

   0.484472009687414   0.483990984405784   0.483489694186365   0.482967079119920   0.482422015526537

  Columns 21 through 25

   0.481853311752198   0.481259703666381   0.480639849836700   0.479992326354637   0.479315621283799

  Columns 26 through 30

   0.478608128699700   0.477868142287169                   0                   0                   0

  Columns 31 through 35

                   0                   0                   0                   0                   0

  Columns 36 through 40

                   0                   0                   0                   0                   0

  Columns 41 through 45

                   0                   0                   0                   0                   0

  Columns 46 through 50

                   0                   0                   0                   0                   0

  Columns 51 through 55

                   0                   0                   0                   0                   0

  Columns 56 through 60

                   0                   0                   0                   0                   0

  Column 61

                   0


outer_code_BER =

  Columns 1 through 5

   0.489820688674564   0.489549705525477   0.489268858097169   0.488977688247135   0.488675712582702

  Columns 6 through 10

   0.488362420898951   0.488037274512748   0.487699704485607   0.487349109727698   0.486984854974612

  Columns 11 through 15

   0.486606268627969   0.486212640450258   0.485803219103448   0.485377209520253   0.484933770095926

  Columns 16 through 20

   0.484472009687414   0.483990984405785   0.483489694186365   0.482967079119922   0.482422015526536

  Columns 21 through 25

   0.481853311752198   0.481259703666382   0.480639849836701   0.479992326354637   0.479315621283799

  Columns 26 through 30

   0.478608128699701   0.477868142287170                   0                   0                   0

  Columns 31 through 35

                   0                   0                   0                   0                   0

  Columns 36 through 40

                   0                   0                   0                   0                   0

  Columns 41 through 45

                   0                   0                   0                   0                   0

  Columns 46 through 50

                   0                   0                   0                   0                   0

  Columns 51 through 55

                   0                   0                   0                   0                   0

  Columns 56 through 60

                   0                   0                   0                   0                   0

  Column 61

                   0


inner_code_BER =

  Columns 1 through 5

   0.489820688674564   0.489549705525477   0.489268858097167   0.488977688247136   0.488675712582701

  Columns 6 through 10

   0.488362420898951   0.488037274512748   0.487699704485605   0.487349109727696   0.486984854974611

  Columns 11 through 15

   0.486606268627968   0.486212640450258   0.485803219103447   0.485377209520252   0.484933770095925

  Columns 16 through 20

   0.484472009687414   0.483990984405784   0.483489694186365   0.482967079119920   0.482422015526537

  Columns 21 through 25

   0.481853311752198   0.481259703666381   0.480639849836700   0.479992326354637   0.479315621283799

  Columns 26 through 30

   0.478608128699700   0.477868142287169   0.477093848458857                   0                   0

  Columns 31 through 35

                   0                   0                   0                   0                   0

  Columns 36 through 40

                   0                   0                   0                   0                   0

  Columns 41 through 45

                   0                   0                   0                   0                   0

  Columns 46 through 50

                   0                   0                   0                   0                   0

  Columns 51 through 55

                   0                   0                   0                   0                   0

  Columns 56 through 60

                   0                   0                   0                   0                   0

  Column 61

                   0


outer_code_BER =

  Columns 1 through 5

   0.489820688674564   0.489549705525477   0.489268858097169   0.488977688247135   0.488675712582702

  Columns 6 through 10

   0.488362420898951   0.488037274512748   0.487699704485607   0.487349109727698   0.486984854974612

  Columns 11 through 15

   0.486606268627969   0.486212640450258   0.485803219103448   0.485377209520253   0.484933770095926

  Columns 16 through 20

   0.484472009687414   0.483990984405785   0.483489694186365   0.482967079119922   0.482422015526536

  Columns 21 through 25

   0.481853311752198   0.481259703666382   0.480639849836701   0.479992326354637   0.479315621283799

  Columns 26 through 30

   0.478608128699701   0.477868142287170   0.477093848458857                   0                   0

  Columns 31 through 35

                   0                   0                   0                   0                   0

  Columns 36 through 40

                   0                   0                   0                   0                   0

  Columns 41 through 45

                   0                   0                   0                   0                   0

  Columns 46 through 50

                   0                   0                   0                   0                   0

  Columns 51 through 55

                   0                   0                   0                   0                   0

  Columns 56 through 60

                   0                   0                   0                   0                   0

  Column 61

                   0


inner_code_BER =

  Columns 1 through 5

   0.489820688674564   0.489549705525477   0.489268858097167   0.488977688247136   0.488675712582701

  Columns 6 through 10

   0.488362420898951   0.488037274512748   0.487699704485605   0.487349109727696   0.486984854974611

  Columns 11 through 15

   0.486606268627968   0.486212640450258   0.485803219103447   0.485377209520252   0.484933770095925

  Columns 16 through 20

   0.484472009687414   0.483990984405784   0.483489694186365   0.482967079119920   0.482422015526537

  Columns 21 through 25

   0.481853311752198   0.481259703666381   0.480639849836700   0.479992326354637   0.479315621283799

  Columns 26 through 30

   0.478608128699700   0.477868142287169   0.477093848458857   0.476283318955403                   0

  Columns 31 through 35

                   0                   0                   0                   0                   0

  Columns 36 through 40

                   0                   0                   0                   0                   0

  Columns 41 through 45

                   0                   0                   0                   0                   0

  Columns 46 through 50

                   0                   0                   0                   0                   0

  Columns 51 through 55

                   0                   0                   0                   0                   0

  Columns 56 through 60

                   0                   0                   0                   0                   0

  Column 61

                   0


outer_code_BER =

  Columns 1 through 5

   0.489820688674564   0.489549705525477   0.489268858097169   0.488977688247135   0.488675712582702

  Columns 6 through 10

   0.488362420898951   0.488037274512748   0.487699704485607   0.487349109727698   0.486984854974612

  Columns 11 through 15

   0.486606268627969   0.486212640450258   0.485803219103448   0.485377209520253   0.484933770095926

  Columns 16 through 20

   0.484472009687414   0.483990984405785   0.483489694186365   0.482967079119922   0.482422015526536

  Columns 21 through 25

   0.481853311752198   0.481259703666382   0.480639849836701   0.479992326354637   0.479315621283799

  Columns 26 through 30

   0.478608128699701   0.477868142287170   0.477093848458857   0.476283318955404                   0

  Columns 31 through 35

                   0                   0                   0                   0                   0

  Columns 36 through 40

                   0                   0                   0                   0                   0

  Columns 41 through 45

                   0                   0                   0                   0                   0

  Columns 46 through 50

                   0                   0                   0                   0                   0

  Columns 51 through 55

                   0                   0                   0                   0                   0

  Columns 56 through 60

                   0                   0                   0                   0                   0

  Column 61

                   0


inner_code_BER =

  Columns 1 through 5

   0.489820688674564   0.489549705525477   0.489268858097167   0.488977688247136   0.488675712582701

  Columns 6 through 10

   0.488362420898951   0.488037274512748   0.487699704485605   0.487349109727696   0.486984854974611

  Columns 11 through 15

   0.486606268627968   0.486212640450258   0.485803219103447   0.485377209520252   0.484933770095925

  Columns 16 through 20

   0.484472009687414   0.483990984405784   0.483489694186365   0.482967079119920   0.482422015526537

  Columns 21 through 25

   0.481853311752198   0.481259703666381   0.480639849836700   0.479992326354637   0.479315621283799

  Columns 26 through 30

   0.478608128699700   0.477868142287169   0.477093848458857   0.476283318955403   0.475434502885383

  Columns 31 through 35

                   0                   0                   0                   0                   0

  Columns 36 through 40

                   0                   0                   0                   0                   0

  Columns 41 through 45

                   0                   0                   0                   0                   0

  Columns 46 through 50

                   0                   0                   0                   0                   0

  Columns 51 through 55

                   0                   0                   0                   0                   0

  Columns 56 through 60

                   0                   0                   0                   0                   0

  Column 61

                   0


outer_code_BER =

  Columns 1 through 5

   0.489820688674564   0.489549705525477   0.489268858097169   0.488977688247135   0.488675712582702

  Columns 6 through 10

   0.488362420898951   0.488037274512748   0.487699704485607   0.487349109727698   0.486984854974612

  Columns 11 through 15

   0.486606268627969   0.486212640450258   0.485803219103448   0.485377209520253   0.484933770095926

  Columns 16 through 20

   0.484472009687414   0.483990984405785   0.483489694186365   0.482967079119922   0.482422015526536

  Columns 21 through 25

   0.481853311752198   0.481259703666382   0.480639849836701   0.479992326354637   0.479315621283799

  Columns 26 through 30

   0.478608128699701   0.477868142287170   0.477093848458857   0.476283318955404   0.475434502885383

  Columns 31 through 35

                   0                   0                   0                   0                   0

  Columns 36 through 40

                   0                   0                   0                   0                   0

  Columns 41 through 45

                   0                   0                   0                   0                   0

  Columns 46 through 50

                   0                   0                   0                   0                   0

  Columns 51 through 55

                   0                   0                   0                   0                   0

  Columns 56 through 60

                   0                   0                   0                   0                   0

  Column 61

                   0


inner_code_BER =

  Columns 1 through 5

   0.489820688674564   0.489549705525477   0.489268858097167   0.488977688247136   0.488675712582701

  Columns 6 through 10

   0.488362420898951   0.488037274512748   0.487699704485605   0.487349109727696   0.486984854974611

  Columns 11 through 15

   0.486606268627968   0.486212640450258   0.485803219103447   0.485377209520252   0.484933770095925

  Columns 16 through 20

   0.484472009687414   0.483990984405784   0.483489694186365   0.482967079119920   0.482422015526537

  Columns 21 through 25

   0.481853311752198   0.481259703666381   0.480639849836700   0.479992326354637   0.479315621283799

  Columns 26 through 30

   0.478608128699700   0.477868142287169   0.477093848458857   0.476283318955403   0.475434502885383

  Columns 31 through 35

   0.474545218161075                   0                   0                   0                   0

  Columns 36 through 40

                   0                   0                   0                   0                   0

  Columns 41 through 45

                   0                   0                   0                   0                   0

  Columns 46 through 50

                   0                   0                   0                   0                   0

  Columns 51 through 55

                   0                   0                   0                   0                   0

  Columns 56 through 60

                   0                   0                   0                   0                   0

  Column 61

                   0


outer_code_BER =

  Columns 1 through 5

   0.489820688674564   0.489549705525477   0.489268858097169   0.488977688247135   0.488675712582702

  Columns 6 through 10

   0.488362420898951   0.488037274512748   0.487699704485607   0.487349109727698   0.486984854974612

  Columns 11 through 15

   0.486606268627969   0.486212640450258   0.485803219103448   0.485377209520253   0.484933770095926

  Columns 16 through 20

   0.484472009687414   0.483990984405785   0.483489694186365   0.482967079119922   0.482422015526536

  Columns 21 through 25

   0.481853311752198   0.481259703666382   0.480639849836701   0.479992326354637   0.479315621283799

  Columns 26 through 30

   0.478608128699701   0.477868142287170   0.477093848458857   0.476283318955404   0.475434502885383

  Columns 31 through 35

   0.474545218161073                   0                   0                   0                   0

  Columns 36 through 40

                   0                   0                   0                   0                   0

  Columns 41 through 45

                   0                   0                   0                   0                   0

  Columns 46 through 50

                   0                   0                   0                   0                   0

  Columns 51 through 55

                   0                   0                   0                   0                   0

  Columns 56 through 60

                   0                   0                   0                   0                   0

  Column 61

                   0


inner_code_BER =

  Columns 1 through 5

   0.489820688674564   0.489549705525477   0.489268858097167   0.488977688247136   0.488675712582701

  Columns 6 through 10

   0.488362420898951   0.488037274512748   0.487699704485605   0.487349109727696   0.486984854974611

  Columns 11 through 15

   0.486606268627968   0.486212640450258   0.485803219103447   0.485377209520252   0.484933770095925

  Columns 16 through 20

   0.484472009687414   0.483990984405784   0.483489694186365   0.482967079119920   0.482422015526537

  Columns 21 through 25

   0.481853311752198   0.481259703666381   0.480639849836700   0.479992326354637   0.479315621283799

  Columns 26 through 30

   0.478608128699700   0.477868142287169   0.477093848458857   0.476283318955403   0.475434502885383

  Columns 31 through 35

   0.474545218161075   0.473613142284907                   0                   0                   0

  Columns 36 through 40

                   0                   0                   0                   0                   0

  Columns 41 through 45

                   0                   0                   0                   0                   0

  Columns 46 through 50

                   0                   0                   0                   0                   0

  Columns 51 through 55

                   0                   0                   0                   0                   0

  Columns 56 through 60

                   0                   0                   0                   0                   0

  Column 61

                   0


outer_code_BER =

  Columns 1 through 5

   0.489820688674564   0.489549705525477   0.489268858097169   0.488977688247135   0.488675712582702

  Columns 6 through 10

   0.488362420898951   0.488037274512748   0.487699704485607   0.487349109727698   0.486984854974612

  Columns 11 through 15

   0.486606268627969   0.486212640450258   0.485803219103448   0.485377209520253   0.484933770095926

  Columns 16 through 20

   0.484472009687414   0.483990984405785   0.483489694186365   0.482967079119922   0.482422015526536

  Columns 21 through 25

   0.481853311752198   0.481259703666382   0.480639849836701   0.479992326354637   0.479315621283799

  Columns 26 through 30

   0.478608128699701   0.477868142287170   0.477093848458857   0.476283318955404   0.475434502885383

  Columns 31 through 35

   0.474545218161073   0.473613142284907                   0                   0                   0

  Columns 36 through 40

                   0                   0                   0                   0                   0

  Columns 41 through 45

                   0                   0                   0                   0                   0

  Columns 46 through 50

                   0                   0                   0                   0                   0

  Columns 51 through 55

                   0                   0                   0                   0                   0

  Columns 56 through 60

                   0                   0                   0                   0                   0

  Column 61

                   0


inner_code_BER =

  Columns 1 through 5

   0.489820688674564   0.489549705525477   0.489268858097167   0.488977688247136   0.488675712582701

  Columns 6 through 10

   0.488362420898951   0.488037274512748   0.487699704485605   0.487349109727696   0.486984854974611

  Columns 11 through 15

   0.486606268627968   0.486212640450258   0.485803219103447   0.485377209520252   0.484933770095925

  Columns 16 through 20

   0.484472009687414   0.483990984405784   0.483489694186365   0.482967079119920   0.482422015526537

  Columns 21 through 25

   0.481853311752198   0.481259703666381   0.480639849836700   0.479992326354637   0.479315621283799

  Columns 26 through 30

   0.478608128699700   0.477868142287169   0.477093848458857   0.476283318955403   0.475434502885383

  Columns 31 through 35

   0.474545218161075   0.473613142284907   0.472635802441796                   0                   0

  Columns 36 through 40

                   0                   0                   0                   0                   0

  Columns 41 through 45

                   0                   0                   0                   0                   0

  Columns 46 through 50

                   0                   0                   0                   0                   0

  Columns 51 through 55

                   0                   0                   0                   0                   0

  Columns 56 through 60

                   0                   0                   0                   0                   0

  Column 61

                   0


outer_code_BER =

  Columns 1 through 5

   0.489820688674564   0.489549705525477   0.489268858097169   0.488977688247135   0.488675712582702

  Columns 6 through 10

   0.488362420898951   0.488037274512748   0.487699704485607   0.487349109727698   0.486984854974612

  Columns 11 through 15

   0.486606268627969   0.486212640450258   0.485803219103448   0.485377209520253   0.484933770095926

  Columns 16 through 20

   0.484472009687414   0.483990984405785   0.483489694186365   0.482967079119922   0.482422015526536

  Columns 21 through 25

   0.481853311752198   0.481259703666382   0.480639849836701   0.479992326354637   0.479315621283799

  Columns 26 through 30

   0.478608128699701   0.477868142287170   0.477093848458857   0.476283318955404   0.475434502885383

  Columns 31 through 35

   0.474545218161073   0.473613142284907   0.472635802441797                   0                   0

  Columns 36 through 40

                   0                   0                   0                   0                   0

  Columns 41 through 45

                   0                   0                   0                   0                   0

  Columns 46 through 50

                   0                   0                   0                   0                   0

  Columns 51 through 55

                   0                   0                   0                   0                   0

  Columns 56 through 60

                   0                   0                   0                   0                   0

  Column 61

                   0


inner_code_BER =

  Columns 1 through 5

   0.489820688674564   0.489549705525477   0.489268858097167   0.488977688247136   0.488675712582701

  Columns 6 through 10

   0.488362420898951   0.488037274512748   0.487699704485605   0.487349109727696   0.486984854974611

  Columns 11 through 15

   0.486606268627968   0.486212640450258   0.485803219103447   0.485377209520252   0.484933770095925

  Columns 16 through 20

   0.484472009687414   0.483990984405784   0.483489694186365   0.482967079119920   0.482422015526537

  Columns 21 through 25

   0.481853311752198   0.481259703666381   0.480639849836700   0.479992326354637   0.479315621283799

  Columns 26 through 30

   0.478608128699700   0.477868142287169   0.477093848458857   0.476283318955403   0.475434502885383

  Columns 31 through 35

   0.474545218161075   0.473613142284907   0.472635802441796   0.471610564855056                   0

  Columns 36 through 40

                   0                   0                   0                   0                   0

  Columns 41 through 45

                   0                   0                   0                   0                   0

  Columns 46 through 50

                   0                   0                   0                   0                   0

  Columns 51 through 55

                   0                   0                   0                   0                   0

  Columns 56 through 60

                   0                   0                   0                   0                   0

  Column 61

                   0


outer_code_BER =

  Columns 1 through 5

   0.489820688674564   0.489549705525477   0.489268858097169   0.488977688247135   0.488675712582702

  Columns 6 through 10

   0.488362420898951   0.488037274512748   0.487699704485607   0.487349109727698   0.486984854974612

  Columns 11 through 15

   0.486606268627969   0.486212640450258   0.485803219103448   0.485377209520253   0.484933770095926

  Columns 16 through 20

   0.484472009687414   0.483990984405785   0.483489694186365   0.482967079119922   0.482422015526536

  Columns 21 through 25

   0.481853311752198   0.481259703666382   0.480639849836701   0.479992326354637   0.479315621283799

  Columns 26 through 30

   0.478608128699701   0.477868142287170   0.477093848458857   0.476283318955404   0.475434502885383

  Columns 31 through 35

   0.474545218161073   0.473613142284907   0.472635802441797   0.471610564855057                   0

  Columns 36 through 40

                   0                   0                   0                   0                   0

  Columns 41 through 45

                   0                   0                   0                   0                   0

  Columns 46 through 50

                   0                   0                   0                   0                   0

  Columns 51 through 55

                   0                   0                   0                   0                   0

  Columns 56 through 60

                   0                   0                   0                   0                   0

  Column 61

                   0


inner_code_BER =

  Columns 1 through 5

   0.489820688674564   0.489549705525477   0.489268858097167   0.488977688247136   0.488675712582701

  Columns 6 through 10

   0.488362420898951   0.488037274512748   0.487699704485605   0.487349109727696   0.486984854974611

  Columns 11 through 15

   0.486606268627968   0.486212640450258   0.485803219103447   0.485377209520252   0.484933770095925

  Columns 16 through 20

   0.484472009687414   0.483990984405784   0.483489694186365   0.482967079119920   0.482422015526537

  Columns 21 through 25

   0.481853311752198   0.481259703666381   0.480639849836700   0.479992326354637   0.479315621283799

  Columns 26 through 30

   0.478608128699700   0.477868142287169   0.477093848458857   0.476283318955403   0.475434502885383

  Columns 31 through 35

   0.474545218161075   0.473613142284907   0.472635802441796   0.471610564855056   0.470534623369671

  Columns 36 through 40

                   0                   0                   0                   0                   0

  Columns 41 through 45

                   0                   0                   0                   0                   0

  Columns 46 through 50

                   0                   0                   0                   0                   0

  Columns 51 through 55

                   0                   0                   0                   0                   0

  Columns 56 through 60

                   0                   0                   0                   0                   0

  Column 61

                   0


outer_code_BER =

  Columns 1 through 5

   0.489820688674564   0.489549705525477   0.489268858097169   0.488977688247135   0.488675712582702

  Columns 6 through 10

   0.488362420898951   0.488037274512748   0.487699704485607   0.487349109727698   0.486984854974612

  Columns 11 through 15

   0.486606268627969   0.486212640450258   0.485803219103448   0.485377209520253   0.484933770095926

  Columns 16 through 20

   0.484472009687414   0.483990984405785   0.483489694186365   0.482967079119922   0.482422015526536

  Columns 21 through 25

   0.481853311752198   0.481259703666382   0.480639849836701   0.479992326354637   0.479315621283799

  Columns 26 through 30

   0.478608128699701   0.477868142287170   0.477093848458857   0.476283318955404   0.475434502885383

  Columns 31 through 35

   0.474545218161073   0.473613142284907   0.472635802441797   0.471610564855057   0.470534623369670

  Columns 36 through 40

                   0                   0                   0                   0                   0

  Columns 41 through 45

                   0                   0                   0                   0                   0

  Columns 46 through 50

                   0                   0                   0                   0                   0

  Columns 51 through 55

                   0                   0                   0                   0                   0

  Columns 56 through 60

                   0                   0                   0                   0                   0

  Column 61

                   0


inner_code_BER =

  Columns 1 through 5

   0.489820688674564   0.489549705525477   0.489268858097167   0.488977688247136   0.488675712582701

  Columns 6 through 10

   0.488362420898951   0.488037274512748   0.487699704485605   0.487349109727696   0.486984854974611

  Columns 11 through 15

   0.486606268627968   0.486212640450258   0.485803219103447   0.485377209520252   0.484933770095925

  Columns 16 through 20

   0.484472009687414   0.483990984405784   0.483489694186365   0.482967079119920   0.482422015526537

  Columns 21 through 25

   0.481853311752198   0.481259703666381   0.480639849836700   0.479992326354637   0.479315621283799

  Columns 26 through 30

   0.478608128699700   0.477868142287169   0.477093848458857   0.476283318955403   0.475434502885383

  Columns 31 through 35

   0.474545218161075   0.473613142284907   0.472635802441796   0.471610564855056   0.470534623369671

  Columns 36 through 40

   0.469404987237633                   0                   0                   0                   0

  Columns 41 through 45

                   0                   0                   0                   0                   0

  Columns 46 through 50

                   0                   0                   0                   0                   0

  Columns 51 through 55

                   0                   0                   0                   0                   0

  Columns 56 through 60

                   0                   0                   0                   0                   0

  Column 61

                   0


outer_code_BER =

  Columns 1 through 5

   0.489820688674564   0.489549705525477   0.489268858097169   0.488977688247135   0.488675712582702

  Columns 6 through 10

   0.488362420898951   0.488037274512748   0.487699704485607   0.487349109727698   0.486984854974612

  Columns 11 through 15

   0.486606268627969   0.486212640450258   0.485803219103448   0.485377209520253   0.484933770095926

  Columns 16 through 20

   0.484472009687414   0.483990984405785   0.483489694186365   0.482967079119922   0.482422015526536

  Columns 21 through 25

   0.481853311752198   0.481259703666382   0.480639849836701   0.479992326354637   0.479315621283799

  Columns 26 through 30

   0.478608128699701   0.477868142287170   0.477093848458857   0.476283318955404   0.475434502885383

  Columns 31 through 35

   0.474545218161073   0.473613142284907   0.472635802441797   0.471610564855057   0.470534623369670

  Columns 36 through 40

   0.469404987237633                   0                   0                   0                   0

  Columns 41 through 45

                   0                   0                   0                   0                   0

  Columns 46 through 50

                   0                   0                   0                   0                   0

  Columns 51 through 55

                   0                   0                   0                   0                   0

  Columns 56 through 60

                   0                   0                   0                   0                   0

  Column 61

                   0


inner_code_BER =

  Columns 1 through 5

   0.489820688674564   0.489549705525477   0.489268858097167   0.488977688247136   0.488675712582701

  Columns 6 through 10

   0.488362420898951   0.488037274512748   0.487699704485605   0.487349109727696   0.486984854974611

  Columns 11 through 15

   0.486606268627968   0.486212640450258   0.485803219103447   0.485377209520252   0.484933770095925

  Columns 16 through 20

   0.484472009687414   0.483990984405784   0.483489694186365   0.482967079119920   0.482422015526537

  Columns 21 through 25

   0.481853311752198   0.481259703666381   0.480639849836700   0.479992326354637   0.479315621283799

  Columns 26 through 30

   0.478608128699700   0.477868142287169   0.477093848458857   0.476283318955403   0.475434502885383

  Columns 31 through 35

   0.474545218161075   0.473613142284907   0.472635802441796   0.471610564855056   0.470534623369671

  Columns 36 through 40

   0.469404987237633   0.468218468098278                   0                   0                   0

  Columns 41 through 45

                   0                   0                   0                   0                   0

  Columns 46 through 50

                   0                   0                   0                   0                   0

  Columns 51 through 55

                   0                   0                   0                   0                   0

  Columns 56 through 60

                   0                   0                   0                   0                   0

  Column 61

                   0


outer_code_BER =

  Columns 1 through 5

   0.489820688674564   0.489549705525477   0.489268858097169   0.488977688247135   0.488675712582702

  Columns 6 through 10

   0.488362420898951   0.488037274512748   0.487699704485607   0.487349109727698   0.486984854974612

  Columns 11 through 15

   0.486606268627969   0.486212640450258   0.485803219103448   0.485377209520253   0.484933770095926

  Columns 16 through 20

   0.484472009687414   0.483990984405785   0.483489694186365   0.482967079119922   0.482422015526536

  Columns 21 through 25

   0.481853311752198   0.481259703666382   0.480639849836701   0.479992326354637   0.479315621283799

  Columns 26 through 30

   0.478608128699701   0.477868142287170   0.477093848458857   0.476283318955404   0.475434502885383

  Columns 31 through 35

   0.474545218161073   0.473613142284907   0.472635802441797   0.471610564855057   0.470534623369670

  Columns 36 through 40

   0.469404987237633   0.468218468098278                   0                   0                   0

  Columns 41 through 45

                   0                   0                   0                   0                   0

  Columns 46 through 50

                   0                   0                   0                   0                   0

  Columns 51 through 55

                   0                   0                   0                   0                   0

  Columns 56 through 60

                   0                   0                   0                   0                   0

  Column 61

                   0


inner_code_BER =

  Columns 1 through 5

   0.489820688674564   0.489549705525477   0.489268858097167   0.488977688247136   0.488675712582701

  Columns 6 through 10

   0.488362420898951   0.488037274512748   0.487699704485605   0.487349109727696   0.486984854974611

  Columns 11 through 15

   0.486606268627968   0.486212640450258   0.485803219103447   0.485377209520252   0.484933770095925

  Columns 16 through 20

   0.484472009687414   0.483990984405784   0.483489694186365   0.482967079119920   0.482422015526537

  Columns 21 through 25

   0.481853311752198   0.481259703666381   0.480639849836700   0.479992326354637   0.479315621283799

  Columns 26 through 30

   0.478608128699700   0.477868142287169   0.477093848458857   0.476283318955403   0.475434502885383

  Columns 31 through 35

   0.474545218161075   0.473613142284907   0.472635802441796   0.471610564855056   0.470534623369671

  Columns 36 through 40

   0.469404987237633   0.468218468098278   0.466971666175213                   0                   0

  Columns 41 through 45

                   0                   0                   0                   0                   0

  Columns 46 through 50

                   0                   0                   0                   0                   0

  Columns 51 through 55

                   0                   0                   0                   0                   0

  Columns 56 through 60

                   0                   0                   0                   0                   0

  Column 61

                   0


outer_code_BER =

  Columns 1 through 5

   0.489820688674564   0.489549705525477   0.489268858097169   0.488977688247135   0.488675712582702

  Columns 6 through 10

   0.488362420898951   0.488037274512748   0.487699704485607   0.487349109727698   0.486984854974612

  Columns 11 through 15

   0.486606268627969   0.486212640450258   0.485803219103448   0.485377209520253   0.484933770095926

  Columns 16 through 20

   0.484472009687414   0.483990984405785   0.483489694186365   0.482967079119922   0.482422015526536

  Columns 21 through 25

   0.481853311752198   0.481259703666382   0.480639849836701   0.479992326354637   0.479315621283799

  Columns 26 through 30

   0.478608128699701   0.477868142287170   0.477093848458857   0.476283318955404   0.475434502885383

  Columns 31 through 35

   0.474545218161073   0.473613142284907   0.472635802441797   0.471610564855057   0.470534623369670

  Columns 36 through 40

   0.469404987237633   0.468218468098278   0.466971666175214                   0                   0

  Columns 41 through 45

                   0                   0                   0                   0                   0

  Columns 46 through 50

                   0                   0                   0                   0                   0

  Columns 51 through 55

                   0                   0                   0                   0                   0

  Columns 56 through 60

                   0                   0                   0                   0                   0

  Column 61

                   0


inner_code_BER =

  Columns 1 through 5

   0.489820688674564   0.489549705525477   0.489268858097167   0.488977688247136   0.488675712582701

  Columns 6 through 10

   0.488362420898951   0.488037274512748   0.487699704485605   0.487349109727696   0.486984854974611

  Columns 11 through 15

   0.486606268627968   0.486212640450258   0.485803219103447   0.485377209520252   0.484933770095925

  Columns 16 through 20

   0.484472009687414   0.483990984405784   0.483489694186365   0.482967079119920   0.482422015526537

  Columns 21 through 25

   0.481853311752198   0.481259703666381   0.480639849836700   0.479992326354637   0.479315621283799

  Columns 26 through 30

   0.478608128699700   0.477868142287169   0.477093848458857   0.476283318955403   0.475434502885383

  Columns 31 through 35

   0.474545218161075   0.473613142284907   0.472635802441796   0.471610564855056   0.470534623369671

  Columns 36 through 40

   0.469404987237633   0.468218468098278   0.466971666175213   0.465660955754069                   0

  Columns 41 through 45

                   0                   0                   0                   0                   0

  Columns 46 through 50

                   0                   0                   0                   0                   0

  Columns 51 through 55

                   0                   0                   0                   0                   0

  Columns 56 through 60

                   0                   0                   0                   0                   0

  Column 61

                   0


outer_code_BER =

  Columns 1 through 5

   0.489820688674564   0.489549705525477   0.489268858097169   0.488977688247135   0.488675712582702

  Columns 6 through 10

   0.488362420898951   0.488037274512748   0.487699704485607   0.487349109727698   0.486984854974612

  Columns 11 through 15

   0.486606268627969   0.486212640450258   0.485803219103448   0.485377209520253   0.484933770095926

  Columns 16 through 20

   0.484472009687414   0.483990984405785   0.483489694186365   0.482967079119922   0.482422015526536

  Columns 21 through 25

   0.481853311752198   0.481259703666382   0.480639849836701   0.479992326354637   0.479315621283799

  Columns 26 through 30

   0.478608128699701   0.477868142287170   0.477093848458857   0.476283318955404   0.475434502885383

  Columns 31 through 35

   0.474545218161073   0.473613142284907   0.472635802441797   0.471610564855057   0.470534623369670

  Columns 36 through 40

   0.469404987237633   0.468218468098278   0.466971666175214   0.465660955754068                   0

  Columns 41 through 45

                   0                   0                   0                   0                   0

  Columns 46 through 50

                   0                   0                   0                   0                   0

  Columns 51 through 55

                   0                   0                   0                   0                   0

  Columns 56 through 60

                   0                   0                   0                   0                   0

  Column 61

                   0


inner_code_BER =

  Columns 1 through 5

   0.489820688674564   0.489549705525477   0.489268858097167   0.488977688247136   0.488675712582701

  Columns 6 through 10

   0.488362420898951   0.488037274512748   0.487699704485605   0.487349109727696   0.486984854974611

  Columns 11 through 15

   0.486606268627968   0.486212640450258   0.485803219103447   0.485377209520252   0.484933770095925

  Columns 16 through 20

   0.484472009687414   0.483990984405784   0.483489694186365   0.482967079119920   0.482422015526537

  Columns 21 through 25

   0.481853311752198   0.481259703666381   0.480639849836700   0.479992326354637   0.479315621283799

  Columns 26 through 30

   0.478608128699700   0.477868142287169   0.477093848458857   0.476283318955403   0.475434502885383

  Columns 31 through 35

   0.474545218161075   0.473613142284907   0.472635802441796   0.471610564855056   0.470534623369671

  Columns 36 through 40

   0.469404987237633   0.468218468098278   0.466971666175213   0.465660955754069   0.464282470068607

  Columns 41 through 45

                   0                   0                   0                   0                   0

  Columns 46 through 50

                   0                   0                   0                   0                   0

  Columns 51 through 55

                   0                   0                   0                   0                   0

  Columns 56 through 60

                   0                   0                   0                   0                   0

  Column 61

                   0


outer_code_BER =

  Columns 1 through 5

   0.489820688674564   0.489549705525477   0.489268858097169   0.488977688247135   0.488675712582702

  Columns 6 through 10

   0.488362420898951   0.488037274512748   0.487699704485607   0.487349109727698   0.486984854974612

  Columns 11 through 15

   0.486606268627969   0.486212640450258   0.485803219103448   0.485377209520253   0.484933770095926

  Columns 16 through 20

   0.484472009687414   0.483990984405785   0.483489694186365   0.482967079119922   0.482422015526536

  Columns 21 through 25

   0.481853311752198   0.481259703666382   0.480639849836701   0.479992326354637   0.479315621283799

  Columns 26 through 30

   0.478608128699701   0.477868142287170   0.477093848458857   0.476283318955404   0.475434502885383

  Columns 31 through 35

   0.474545218161073   0.473613142284907   0.472635802441797   0.471610564855057   0.470534623369670

  Columns 36 through 40

   0.469404987237633   0.468218468098278   0.466971666175214   0.465660955754068   0.464282470068608

  Columns 41 through 45

                   0                   0                   0                   0                   0

  Columns 46 through 50

                   0                   0                   0                   0                   0

  Columns 51 through 55

                   0                   0                   0                   0                   0

  Columns 56 through 60

                   0                   0                   0                   0                   0

  Column 61

                   0


inner_code_BER =

  Columns 1 through 5

   0.489820688674564   0.489549705525477   0.489268858097167   0.488977688247136   0.488675712582701

  Columns 6 through 10

   0.488362420898951   0.488037274512748   0.487699704485605   0.487349109727696   0.486984854974611

  Columns 11 through 15

   0.486606268627968   0.486212640450258   0.485803219103447   0.485377209520252   0.484933770095925

  Columns 16 through 20

   0.484472009687414   0.483990984405784   0.483489694186365   0.482967079119920   0.482422015526537

  Columns 21 through 25

   0.481853311752198   0.481259703666381   0.480639849836700   0.479992326354637   0.479315621283799

  Columns 26 through 30

   0.478608128699700   0.477868142287169   0.477093848458857   0.476283318955403   0.475434502885383

  Columns 31 through 35

   0.474545218161075   0.473613142284907   0.472635802441796   0.471610564855056   0.470534623369671

  Columns 36 through 40

   0.469404987237633   0.468218468098278   0.466971666175213   0.465660955754069   0.464282470068607

  Columns 41 through 45

   0.462832085812781                   0                   0                   0                   0

  Columns 46 through 50

                   0                   0                   0                   0                   0

  Columns 51 through 55

                   0                   0                   0                   0                   0

  Columns 56 through 60

                   0                   0                   0                   0                   0

  Column 61

                   0


outer_code_BER =

  Columns 1 through 5

   0.489820688674564   0.489549705525477   0.489268858097169   0.488977688247135   0.488675712582702

  Columns 6 through 10

   0.488362420898951   0.488037274512748   0.487699704485607   0.487349109727698   0.486984854974612

  Columns 11 through 15

   0.486606268627969   0.486212640450258   0.485803219103448   0.485377209520253   0.484933770095926

  Columns 16 through 20

   0.484472009687414   0.483990984405785   0.483489694186365   0.482967079119922   0.482422015526536

  Columns 21 through 25

   0.481853311752198   0.481259703666382   0.480639849836701   0.479992326354637   0.479315621283799

  Columns 26 through 30

   0.478608128699701   0.477868142287170   0.477093848458857   0.476283318955404   0.475434502885383

  Columns 31 through 35

   0.474545218161073   0.473613142284907   0.472635802441797   0.471610564855057   0.470534623369670

  Columns 36 through 40

   0.469404987237633   0.468218468098278   0.466971666175214   0.465660955754068   0.464282470068608

  Columns 41 through 45

   0.462832085812780                   0                   0                   0                   0

  Columns 46 through 50

                   0                   0                   0                   0                   0

  Columns 51 through 55

                   0                   0                   0                   0                   0

  Columns 56 through 60

                   0                   0                   0                   0                   0

  Column 61

                   0


inner_code_BER =

  Columns 1 through 5

   0.489820688674564   0.489549705525477   0.489268858097167   0.488977688247136   0.488675712582701

  Columns 6 through 10

   0.488362420898951   0.488037274512748   0.487699704485605   0.487349109727696   0.486984854974611

  Columns 11 through 15

   0.486606268627968   0.486212640450258   0.485803219103447   0.485377209520252   0.484933770095925

  Columns 16 through 20

   0.484472009687414   0.483990984405784   0.483489694186365   0.482967079119920   0.482422015526537

  Columns 21 through 25

   0.481853311752198   0.481259703666381   0.480639849836700   0.479992326354637   0.479315621283799

  Columns 26 through 30

   0.478608128699700   0.477868142287169   0.477093848458857   0.476283318955403   0.475434502885383

  Columns 31 through 35

   0.474545218161075   0.473613142284907   0.472635802441796   0.471610564855056   0.470534623369671

  Columns 36 through 40

   0.469404987237633   0.468218468098278   0.466971666175213   0.465660955754069   0.464282470068607

  Columns 41 through 45

   0.462832085812781   0.461305407624856                   0                   0                   0

  Columns 46 through 50

                   0                   0                   0                   0                   0

  Columns 51 through 55

                   0                   0                   0                   0                   0

  Columns 56 through 60

                   0                   0                   0                   0                   0

  Column 61

                   0


outer_code_BER =

  Columns 1 through 5

   0.489820688674564   0.489549705525477   0.489268858097169   0.488977688247135   0.488675712582702

  Columns 6 through 10

   0.488362420898951   0.488037274512748   0.487699704485607   0.487349109727698   0.486984854974612

  Columns 11 through 15

   0.486606268627969   0.486212640450258   0.485803219103448   0.485377209520253   0.484933770095926

  Columns 16 through 20

   0.484472009687414   0.483990984405785   0.483489694186365   0.482967079119922   0.482422015526536

  Columns 21 through 25

   0.481853311752198   0.481259703666382   0.480639849836701   0.479992326354637   0.479315621283799

  Columns 26 through 30

   0.478608128699701   0.477868142287170   0.477093848458857   0.476283318955404   0.475434502885383

  Columns 31 through 35

   0.474545218161073   0.473613142284907   0.472635802441797   0.471610564855057   0.470534623369670

  Columns 36 through 40

   0.469404987237633   0.468218468098278   0.466971666175214   0.465660955754068   0.464282470068608

  Columns 41 through 45

   0.462832085812780   0.461305407624856                   0                   0                   0

  Columns 46 through 50

                   0                   0                   0                   0                   0

  Columns 51 through 55

                   0                   0                   0                   0                   0

  Columns 56 through 60

                   0                   0                   0                   0                   0

  Column 61

                   0


inner_code_BER =

  Columns 1 through 5

   0.489820688674564   0.489549705525477   0.489268858097167   0.488977688247136   0.488675712582701

  Columns 6 through 10

   0.488362420898951   0.488037274512748   0.487699704485605   0.487349109727696   0.486984854974611

  Columns 11 through 15

   0.486606268627968   0.486212640450258   0.485803219103447   0.485377209520252   0.484933770095925

  Columns 16 through 20

   0.484472009687414   0.483990984405784   0.483489694186365   0.482967079119920   0.482422015526537

  Columns 21 through 25

   0.481853311752198   0.481259703666381   0.480639849836700   0.479992326354637   0.479315621283799

  Columns 26 through 30

   0.478608128699700   0.477868142287169   0.477093848458857   0.476283318955403   0.475434502885383

  Columns 31 through 35

   0.474545218161075   0.473613142284907   0.472635802441796   0.471610564855056   0.470534623369671

  Columns 36 through 40

   0.469404987237633   0.468218468098278   0.466971666175213   0.465660955754069   0.464282470068607

  Columns 41 through 45

   0.462832085812781   0.461305407624856   0.459697753068055                   0                   0

  Columns 46 through 50

                   0                   0                   0                   0                   0

  Columns 51 through 55

                   0                   0                   0                   0                   0

  Columns 56 through 60

                   0                   0                   0                   0                   0

  Column 61

                   0


outer_code_BER =

  Columns 1 through 5

   0.489820688674564   0.489549705525477   0.489268858097169   0.488977688247135   0.488675712582702

  Columns 6 through 10

   0.488362420898951   0.488037274512748   0.487699704485607   0.487349109727698   0.486984854974612

  Columns 11 through 15

   0.486606268627969   0.486212640450258   0.485803219103448   0.485377209520253   0.484933770095926

  Columns 16 through 20

   0.484472009687414   0.483990984405785   0.483489694186365   0.482967079119922   0.482422015526536

  Columns 21 through 25

   0.481853311752198   0.481259703666382   0.480639849836701   0.479992326354637   0.479315621283799

  Columns 26 through 30

   0.478608128699701   0.477868142287170   0.477093848458857   0.476283318955404   0.475434502885383

  Columns 31 through 35

   0.474545218161073   0.473613142284907   0.472635802441797   0.471610564855057   0.470534623369670

  Columns 36 through 40

   0.469404987237633   0.468218468098278   0.466971666175214   0.465660955754068   0.464282470068608

  Columns 41 through 45

   0.462832085812780   0.461305407624856   0.459697753068056                   0                   0

  Columns 46 through 50

                   0                   0                   0                   0                   0

  Columns 51 through 55

                   0                   0                   0                   0                   0

  Columns 56 through 60

                   0                   0                   0                   0                   0

  Column 61

                   0


inner_code_BER =

  Columns 1 through 5

   0.489820688674564   0.489549705525477   0.489268858097167   0.488977688247136   0.488675712582701

  Columns 6 through 10

   0.488362420898951   0.488037274512748   0.487699704485605   0.487349109727696   0.486984854974611

  Columns 11 through 15

   0.486606268627968   0.486212640450258   0.485803219103447   0.485377209520252   0.484933770095925

  Columns 16 through 20

   0.484472009687414   0.483990984405784   0.483489694186365   0.482967079119920   0.482422015526537

  Columns 21 through 25

   0.481853311752198   0.481259703666381   0.480639849836700   0.479992326354637   0.479315621283799

  Columns 26 through 30

   0.478608128699700   0.477868142287169   0.477093848458857   0.476283318955403   0.475434502885383

  Columns 31 through 35

   0.474545218161075   0.473613142284907   0.472635802441796   0.471610564855056   0.470534623369671

  Columns 36 through 40

   0.469404987237633   0.468218468098278   0.466971666175213   0.465660955754069   0.464282470068607

  Columns 41 through 45

   0.462832085812781   0.461305407624856   0.459697753068055   0.458004138879409                   0

  Columns 46 through 50

                   0                   0                   0                   0                   0

  Columns 51 through 55

                   0                   0                   0                   0                   0

  Columns 56 through 60

                   0                   0                   0                   0                   0

  Column 61

                   0


outer_code_BER =

  Columns 1 through 5

   0.489820688674564   0.489549705525477   0.489268858097169   0.488977688247135   0.488675712582702

  Columns 6 through 10

   0.488362420898951   0.488037274512748   0.487699704485607   0.487349109727698   0.486984854974612

  Columns 11 through 15

   0.486606268627969   0.486212640450258   0.485803219103448   0.485377209520253   0.484933770095926

  Columns 16 through 20

   0.484472009687414   0.483990984405785   0.483489694186365   0.482967079119922   0.482422015526536

  Columns 21 through 25

   0.481853311752198   0.481259703666382   0.480639849836701   0.479992326354637   0.479315621283799

  Columns 26 through 30

   0.478608128699701   0.477868142287170   0.477093848458857   0.476283318955404   0.475434502885383

  Columns 31 through 35

   0.474545218161073   0.473613142284907   0.472635802441797   0.471610564855057   0.470534623369670

  Columns 36 through 40

   0.469404987237633   0.468218468098278   0.466971666175214   0.465660955754068   0.464282470068608

  Columns 41 through 45

   0.462832085812780   0.461305407624856   0.459697753068056   0.458004138879409                   0

  Columns 46 through 50

                   0                   0                   0                   0                   0

  Columns 51 through 55

                   0                   0                   0                   0                   0

  Columns 56 through 60

                   0                   0                   0                   0                   0

  Column 61

                   0


inner_code_BER =

  Columns 1 through 5

   0.489820688674564   0.489549705525477   0.489268858097167   0.488977688247136   0.488675712582701

  Columns 6 through 10

   0.488362420898951   0.488037274512748   0.487699704485605   0.487349109727696   0.486984854974611

  Columns 11 through 15

   0.486606268627968   0.486212640450258   0.485803219103447   0.485377209520252   0.484933770095925

  Columns 16 through 20

   0.484472009687414   0.483990984405784   0.483489694186365   0.482967079119920   0.482422015526537

  Columns 21 through 25

   0.481853311752198   0.481259703666381   0.480639849836700   0.479992326354637   0.479315621283799

  Columns 26 through 30

   0.478608128699700   0.477868142287169   0.477093848458857   0.476283318955403   0.475434502885383

  Columns 31 through 35

   0.474545218161075   0.473613142284907   0.472635802441796   0.471610564855056   0.470534623369671

  Columns 36 through 40

   0.469404987237633   0.468218468098278   0.466971666175213   0.465660955754069   0.464282470068607

  Columns 41 through 45

   0.462832085812781   0.461305407624856   0.459697753068055   0.458004138879409   0.456219269595147

  Columns 46 through 50

                   0                   0                   0                   0                   0

  Columns 51 through 55

                   0                   0                   0                   0                   0

  Columns 56 through 60

                   0                   0                   0                   0                   0

  Column 61

                   0


outer_code_BER =

  Columns 1 through 5

   0.489820688674564   0.489549705525477   0.489268858097169   0.488977688247135   0.488675712582702

  Columns 6 through 10

   0.488362420898951   0.488037274512748   0.487699704485607   0.487349109727698   0.486984854974612

  Columns 11 through 15

   0.486606268627969   0.486212640450258   0.485803219103448   0.485377209520253   0.484933770095926

  Columns 16 through 20

   0.484472009687414   0.483990984405785   0.483489694186365   0.482967079119922   0.482422015526536

  Columns 21 through 25

   0.481853311752198   0.481259703666382   0.480639849836701   0.479992326354637   0.479315621283799

  Columns 26 through 30

   0.478608128699701   0.477868142287170   0.477093848458857   0.476283318955404   0.475434502885383

  Columns 31 through 35

   0.474545218161073   0.473613142284907   0.472635802441797   0.471610564855057   0.470534623369670

  Columns 36 through 40

   0.469404987237633   0.468218468098278   0.466971666175214   0.465660955754068   0.464282470068608

  Columns 41 through 45

   0.462832085812780   0.461305407624856   0.459697753068056   0.458004138879409   0.456219269595148

  Columns 46 through 50

                   0                   0                   0                   0                   0

  Columns 51 through 55

                   0                   0                   0                   0                   0

  Columns 56 through 60

                   0                   0                   0                   0                   0

  Column 61

                   0


inner_code_BER =

  Columns 1 through 5

   0.489820688674564   0.489549705525477   0.489268858097167   0.488977688247136   0.488675712582701

  Columns 6 through 10

   0.488362420898951   0.488037274512748   0.487699704485605   0.487349109727696   0.486984854974611

  Columns 11 through 15

   0.486606268627968   0.486212640450258   0.485803219103447   0.485377209520252   0.484933770095925

  Columns 16 through 20

   0.484472009687414   0.483990984405784   0.483489694186365   0.482967079119920   0.482422015526537

  Columns 21 through 25

   0.481853311752198   0.481259703666381   0.480639849836700   0.479992326354637   0.479315621283799

  Columns 26 through 30

   0.478608128699700   0.477868142287169   0.477093848458857   0.476283318955403   0.475434502885383

  Columns 31 through 35

   0.474545218161075   0.473613142284907   0.472635802441796   0.471610564855056   0.470534623369671

  Columns 36 through 40

   0.469404987237633   0.468218468098278   0.466971666175213   0.465660955754069   0.464282470068607

  Columns 41 through 45

   0.462832085812781   0.461305407624856   0.459697753068055   0.458004138879409   0.456219269595147

  Columns 46 through 50

   0.454337530115074                   0                   0                   0                   0

  Columns 51 through 55

                   0                   0                   0                   0                   0

  Columns 56 through 60

                   0                   0                   0                   0                   0

  Column 61

                   0


outer_code_BER =

  Columns 1 through 5

   0.489820688674564   0.489549705525477   0.489268858097169   0.488977688247135   0.488675712582702

  Columns 6 through 10

   0.488362420898951   0.488037274512748   0.487699704485607   0.487349109727698   0.486984854974612

  Columns 11 through 15

   0.486606268627969   0.486212640450258   0.485803219103448   0.485377209520253   0.484933770095926

  Columns 16 through 20

   0.484472009687414   0.483990984405785   0.483489694186365   0.482967079119922   0.482422015526536

  Columns 21 through 25

   0.481853311752198   0.481259703666382   0.480639849836701   0.479992326354637   0.479315621283799

  Columns 26 through 30

   0.478608128699701   0.477868142287170   0.477093848458857   0.476283318955404   0.475434502885383

  Columns 31 through 35

   0.474545218161073   0.473613142284907   0.472635802441797   0.471610564855057   0.470534623369670

  Columns 36 through 40

   0.469404987237633   0.468218468098278   0.466971666175214   0.465660955754068   0.464282470068608

  Columns 41 through 45

   0.462832085812780   0.461305407624856   0.459697753068056   0.458004138879409   0.456219269595148

  Columns 46 through 50

   0.454337530115074                   0                   0                   0                   0

  Columns 51 through 55

                   0                   0                   0                   0                   0

  Columns 56 through 60

                   0                   0                   0                   0                   0

  Column 61

                   0


inner_code_BER =

  Columns 1 through 5

   0.489820688674564   0.489549705525477   0.489268858097167   0.488977688247136   0.488675712582701

  Columns 6 through 10

   0.488362420898951   0.488037274512748   0.487699704485605   0.487349109727696   0.486984854974611

  Columns 11 through 15

   0.486606268627968   0.486212640450258   0.485803219103447   0.485377209520252   0.484933770095925

  Columns 16 through 20

   0.484472009687414   0.483990984405784   0.483489694186365   0.482967079119920   0.482422015526537

  Columns 21 through 25

   0.481853311752198   0.481259703666381   0.480639849836700   0.479992326354637   0.479315621283799

  Columns 26 through 30

   0.478608128699700   0.477868142287169   0.477093848458857   0.476283318955403   0.475434502885383

  Columns 31 through 35

   0.474545218161075   0.473613142284907   0.472635802441796   0.471610564855056   0.470534623369671

  Columns 36 through 40

   0.469404987237633   0.468218468098278   0.466971666175213   0.465660955754069   0.464282470068607

  Columns 41 through 45

   0.462832085812781   0.461305407624856   0.459697753068055   0.458004138879409   0.456219269595147

  Columns 46 through 50

   0.454337530115074   0.452352984373670                   0                   0                   0

  Columns 51 through 55

                   0                   0                   0                   0                   0

  Columns 56 through 60

                   0                   0                   0                   0                   0

  Column 61

                   0


outer_code_BER =

  Columns 1 through 5

   0.489820688674564   0.489549705525477   0.489268858097169   0.488977688247135   0.488675712582702

  Columns 6 through 10

   0.488362420898951   0.488037274512748   0.487699704485607   0.487349109727698   0.486984854974612

  Columns 11 through 15

   0.486606268627969   0.486212640450258   0.485803219103448   0.485377209520253   0.484933770095926

  Columns 16 through 20

   0.484472009687414   0.483990984405785   0.483489694186365   0.482967079119922   0.482422015526536

  Columns 21 through 25

   0.481853311752198   0.481259703666382   0.480639849836701   0.479992326354637   0.479315621283799

  Columns 26 through 30

   0.478608128699701   0.477868142287170   0.477093848458857   0.476283318955404   0.475434502885383

  Columns 31 through 35

   0.474545218161073   0.473613142284907   0.472635802441797   0.471610564855057   0.470534623369670

  Columns 36 through 40

   0.469404987237633   0.468218468098278   0.466971666175214   0.465660955754068   0.464282470068608

  Columns 41 through 45

   0.462832085812780   0.461305407624856   0.459697753068056   0.458004138879409   0.456219269595148

  Columns 46 through 50

   0.454337530115074   0.452352984373670                   0                   0                   0

  Columns 51 through 55

                   0                   0                   0                   0                   0

  Columns 56 through 60

                   0                   0                   0                   0                   0

  Column 61

                   0


inner_code_BER =

  Columns 1 through 5

   0.489820688674564   0.489549705525477   0.489268858097167   0.488977688247136   0.488675712582701

  Columns 6 through 10

   0.488362420898951   0.488037274512748   0.487699704485605   0.487349109727696   0.486984854974611

  Columns 11 through 15

   0.486606268627968   0.486212640450258   0.485803219103447   0.485377209520252   0.484933770095925

  Columns 16 through 20

   0.484472009687414   0.483990984405784   0.483489694186365   0.482967079119920   0.482422015526537

  Columns 21 through 25

   0.481853311752198   0.481259703666381   0.480639849836700   0.479992326354637   0.479315621283799

  Columns 26 through 30

   0.478608128699700   0.477868142287169   0.477093848458857   0.476283318955403   0.475434502885383

  Columns 31 through 35

   0.474545218161075   0.473613142284907   0.472635802441796   0.471610564855056   0.470534623369671

  Columns 36 through 40

   0.469404987237633   0.468218468098278   0.466971666175213   0.465660955754069   0.464282470068607

  Columns 41 through 45

   0.462832085812781   0.461305407624856   0.459697753068055   0.458004138879409   0.456219269595147

  Columns 46 through 50

   0.454337530115074   0.452352984373670   0.450259383078563                   0                   0

  Columns 51 through 55

                   0                   0                   0                   0                   0

  Columns 56 through 60

                   0                   0                   0                   0                   0

  Column 61

                   0


outer_code_BER =

  Columns 1 through 5

   0.489820688674564   0.489549705525477   0.489268858097169   0.488977688247135   0.488675712582702

  Columns 6 through 10

   0.488362420898951   0.488037274512748   0.487699704485607   0.487349109727698   0.486984854974612

  Columns 11 through 15

   0.486606268627969   0.486212640450258   0.485803219103448   0.485377209520253   0.484933770095926

  Columns 16 through 20

   0.484472009687414   0.483990984405785   0.483489694186365   0.482967079119922   0.482422015526536

  Columns 21 through 25

   0.481853311752198   0.481259703666382   0.480639849836701   0.479992326354637   0.479315621283799

  Columns 26 through 30

   0.478608128699701   0.477868142287170   0.477093848458857   0.476283318955404   0.475434502885383

  Columns 31 through 35

   0.474545218161073   0.473613142284907   0.472635802441797   0.471610564855057   0.470534623369670

  Columns 36 through 40

   0.469404987237633   0.468218468098278   0.466971666175214   0.465660955754068   0.464282470068608

  Columns 41 through 45

   0.462832085812780   0.461305407624856   0.459697753068056   0.458004138879409   0.456219269595148

  Columns 46 through 50

   0.454337530115074   0.452352984373670   0.450259383078563                   0                   0

  Columns 51 through 55

                   0                   0                   0                   0                   0

  Columns 56 through 60

                   0                   0                   0                   0                   0

  Column 61

                   0


inner_code_BER =

  Columns 1 through 5

   0.489820688674564   0.489549705525477   0.489268858097167   0.488977688247136   0.488675712582701

  Columns 6 through 10

   0.488362420898951   0.488037274512748   0.487699704485605   0.487349109727696   0.486984854974611

  Columns 11 through 15

   0.486606268627968   0.486212640450258   0.485803219103447   0.485377209520252   0.484933770095925

  Columns 16 through 20

   0.484472009687414   0.483990984405784   0.483489694186365   0.482967079119920   0.482422015526537

  Columns 21 through 25

   0.481853311752198   0.481259703666381   0.480639849836700   0.479992326354637   0.479315621283799

  Columns 26 through 30

   0.478608128699700   0.477868142287169   0.477093848458857   0.476283318955403   0.475434502885383

  Columns 31 through 35

   0.474545218161075   0.473613142284907   0.472635802441796   0.471610564855056   0.470534623369671

  Columns 36 through 40

   0.469404987237633   0.468218468098278   0.466971666175213   0.465660955754069   0.464282470068607

  Columns 41 through 45

   0.462832085812781   0.461305407624856   0.459697753068055   0.458004138879409   0.456219269595147

  Columns 46 through 50

   0.454337530115074   0.452352984373670   0.450259383078563   0.448050184498919                   0

  Columns 51 through 55

                   0                   0                   0                   0                   0

  Columns 56 through 60

                   0                   0                   0                   0                   0

  Column 61

                   0


outer_code_BER =

  Columns 1 through 5

   0.489820688674564   0.489549705525477   0.489268858097169   0.488977688247135   0.488675712582702

  Columns 6 through 10

   0.488362420898951   0.488037274512748   0.487699704485607   0.487349109727698   0.486984854974612

  Columns 11 through 15

   0.486606268627969   0.486212640450258   0.485803219103448   0.485377209520253   0.484933770095926

  Columns 16 through 20

   0.484472009687414   0.483990984405785   0.483489694186365   0.482967079119922   0.482422015526536

  Columns 21 through 25

   0.481853311752198   0.481259703666382   0.480639849836701   0.479992326354637   0.479315621283799

  Columns 26 through 30

   0.478608128699701   0.477868142287170   0.477093848458857   0.476283318955404   0.475434502885383

  Columns 31 through 35

   0.474545218161073   0.473613142284907   0.472635802441797   0.471610564855057   0.470534623369670

  Columns 36 through 40

   0.469404987237633   0.468218468098278   0.466971666175214   0.465660955754068   0.464282470068608

  Columns 41 through 45

   0.462832085812780   0.461305407624856   0.459697753068056   0.458004138879409   0.456219269595148

  Columns 46 through 50

   0.454337530115074   0.452352984373670   0.450259383078563   0.448050184498919                   0

  Columns 51 through 55

                   0                   0                   0                   0                   0

  Columns 56 through 60

                   0                   0                   0                   0                   0

  Column 61

                   0


inner_code_BER =

  Columns 1 through 5

   0.489820688674564   0.489549705525477   0.489268858097167   0.488977688247136   0.488675712582701

  Columns 6 through 10

   0.488362420898951   0.488037274512748   0.487699704485605   0.487349109727696   0.486984854974611

  Columns 11 through 15

   0.486606268627968   0.486212640450258   0.485803219103447   0.485377209520252   0.484933770095925

  Columns 16 through 20

   0.484472009687414   0.483990984405784   0.483489694186365   0.482967079119920   0.482422015526537

  Columns 21 through 25

   0.481853311752198   0.481259703666381   0.480639849836700   0.479992326354637   0.479315621283799

  Columns 26 through 30

   0.478608128699700   0.477868142287169   0.477093848458857   0.476283318955403   0.475434502885383

  Columns 31 through 35

   0.474545218161075   0.473613142284907   0.472635802441796   0.471610564855056   0.470534623369671

  Columns 36 through 40

   0.469404987237633   0.468218468098278   0.466971666175213   0.465660955754069   0.464282470068607

  Columns 41 through 45

   0.462832085812781   0.461305407624856   0.459697753068055   0.458004138879409   0.456219269595147

  Columns 46 through 50

   0.454337530115074   0.452352984373670   0.450259383078563   0.448050184498919   0.445718593569514

  Columns 51 through 55

                   0                   0                   0                   0                   0

  Columns 56 through 60

                   0                   0                   0                   0                   0

  Column 61

                   0


outer_code_BER =

  Columns 1 through 5

   0.489820688674564   0.489549705525477   0.489268858097169   0.488977688247135   0.488675712582702

  Columns 6 through 10

   0.488362420898951   0.488037274512748   0.487699704485607   0.487349109727698   0.486984854974612

  Columns 11 through 15

   0.486606268627969   0.486212640450258   0.485803219103448   0.485377209520253   0.484933770095926

  Columns 16 through 20

   0.484472009687414   0.483990984405785   0.483489694186365   0.482967079119922   0.482422015526536

  Columns 21 through 25

   0.481853311752198   0.481259703666382   0.480639849836701   0.479992326354637   0.479315621283799

  Columns 26 through 30

   0.478608128699701   0.477868142287170   0.477093848458857   0.476283318955404   0.475434502885383

  Columns 31 through 35

   0.474545218161073   0.473613142284907   0.472635802441797   0.471610564855057   0.470534623369670

  Columns 36 through 40

   0.469404987237633   0.468218468098278   0.466971666175214   0.465660955754068   0.464282470068608

  Columns 41 through 45

   0.462832085812780   0.461305407624856   0.459697753068056   0.458004138879409   0.456219269595148

  Columns 46 through 50

   0.454337530115074   0.452352984373670   0.450259383078563   0.448050184498919   0.445718593569514

  Columns 51 through 55

                   0                   0                   0                   0                   0

  Columns 56 through 60

                   0                   0                   0                   0                   0

  Column 61

                   0


inner_code_BER =

  Columns 1 through 5

   0.489820688674564   0.489549705525477   0.489268858097167   0.488977688247136   0.488675712582701

  Columns 6 through 10

   0.488362420898951   0.488037274512748   0.487699704485605   0.487349109727696   0.486984854974611

  Columns 11 through 15

   0.486606268627968   0.486212640450258   0.485803219103447   0.485377209520252   0.484933770095925

  Columns 16 through 20

   0.484472009687414   0.483990984405784   0.483489694186365   0.482967079119920   0.482422015526537

  Columns 21 through 25

   0.481853311752198   0.481259703666381   0.480639849836700   0.479992326354637   0.479315621283799

  Columns 26 through 30

   0.478608128699700   0.477868142287169   0.477093848458857   0.476283318955403   0.475434502885383

  Columns 31 through 35

   0.474545218161075   0.473613142284907   0.472635802441796   0.471610564855056   0.470534623369671

  Columns 36 through 40

   0.469404987237633   0.468218468098278   0.466971666175213   0.465660955754069   0.464282470068607

  Columns 41 through 45

   0.462832085812781   0.461305407624856   0.459697753068055   0.458004138879409   0.456219269595147

  Columns 46 through 50

   0.454337530115074   0.452352984373670   0.450259383078563   0.448050184498919   0.445718593569514

  Columns 51 through 55

   0.443257626136169                   0                   0                   0                   0

  Columns 56 through 60

                   0                   0                   0                   0                   0

  Column 61

                   0


outer_code_BER =

  Columns 1 through 5

   0.489820688674564   0.489549705525477   0.489268858097169   0.488977688247135   0.488675712582702

  Columns 6 through 10

   0.488362420898951   0.488037274512748   0.487699704485607   0.487349109727698   0.486984854974612

  Columns 11 through 15

   0.486606268627969   0.486212640450258   0.485803219103448   0.485377209520253   0.484933770095926

  Columns 16 through 20

   0.484472009687414   0.483990984405785   0.483489694186365   0.482967079119922   0.482422015526536

  Columns 21 through 25

   0.481853311752198   0.481259703666382   0.480639849836701   0.479992326354637   0.479315621283799

  Columns 26 through 30

   0.478608128699701   0.477868142287170   0.477093848458857   0.476283318955404   0.475434502885383

  Columns 31 through 35

   0.474545218161073   0.473613142284907   0.472635802441797   0.471610564855057   0.470534623369670

  Columns 36 through 40

   0.469404987237633   0.468218468098278   0.466971666175214   0.465660955754068   0.464282470068608

  Columns 41 through 45

   0.462832085812780   0.461305407624856   0.459697753068056   0.458004138879409   0.456219269595148

  Columns 46 through 50

   0.454337530115074   0.452352984373670   0.450259383078563   0.448050184498919   0.445718593569514

  Columns 51 through 55

   0.443257626136169                   0                   0                   0                   0

  Columns 56 through 60

                   0                   0                   0                   0                   0

  Column 61

                   0


inner_code_BER =

  Columns 1 through 5

   0.489820688674564   0.489549705525477   0.489268858097167   0.488977688247136   0.488675712582701

  Columns 6 through 10

   0.488362420898951   0.488037274512748   0.487699704485605   0.487349109727696   0.486984854974611

  Columns 11 through 15

   0.486606268627968   0.486212640450258   0.485803219103447   0.485377209520252   0.484933770095925

  Columns 16 through 20

   0.484472009687414   0.483990984405784   0.483489694186365   0.482967079119920   0.482422015526537

  Columns 21 through 25

   0.481853311752198   0.481259703666381   0.480639849836700   0.479992326354637   0.479315621283799

  Columns 26 through 30

   0.478608128699700   0.477868142287169   0.477093848458857   0.476283318955403   0.475434502885383

  Columns 31 through 35

   0.474545218161075   0.473613142284907   0.472635802441796   0.471610564855056   0.470534623369671

  Columns 36 through 40

   0.469404987237633   0.468218468098278   0.466971666175213   0.465660955754069   0.464282470068607

  Columns 41 through 45

   0.462832085812781   0.461305407624856   0.459697753068055   0.458004138879409   0.456219269595147

  Columns 46 through 50

   0.454337530115074   0.452352984373670   0.450259383078563   0.448050184498919   0.445718593569514

  Columns 51 through 55

   0.443257626136169   0.440660206973816                   0                   0                   0

  Columns 56 through 60

                   0                   0                   0                   0                   0

  Column 61

                   0


outer_code_BER =

  Columns 1 through 5

   0.489820688674564   0.489549705525477   0.489268858097169   0.488977688247135   0.488675712582702

  Columns 6 through 10

   0.488362420898951   0.488037274512748   0.487699704485607   0.487349109727698   0.486984854974612

  Columns 11 through 15

   0.486606268627969   0.486212640450258   0.485803219103448   0.485377209520253   0.484933770095926

  Columns 16 through 20

   0.484472009687414   0.483990984405785   0.483489694186365   0.482967079119922   0.482422015526536

  Columns 21 through 25

   0.481853311752198   0.481259703666382   0.480639849836701   0.479992326354637   0.479315621283799

  Columns 26 through 30

   0.478608128699701   0.477868142287170   0.477093848458857   0.476283318955404   0.475434502885383

  Columns 31 through 35

   0.474545218161073   0.473613142284907   0.472635802441797   0.471610564855057   0.470534623369670

  Columns 36 through 40

   0.469404987237633   0.468218468098278   0.466971666175214   0.465660955754068   0.464282470068608

  Columns 41 through 45

   0.462832085812780   0.461305407624856   0.459697753068056   0.458004138879409   0.456219269595148

  Columns 46 through 50

   0.454337530115074   0.452352984373670   0.450259383078563   0.448050184498919   0.445718593569514

  Columns 51 through 55

   0.443257626136169   0.440660206973818                   0                   0                   0

  Columns 56 through 60

                   0                   0                   0                   0                   0

  Column 61

                   0


inner_code_BER =

  Columns 1 through 5

   0.489820688674564   0.489549705525477   0.489268858097167   0.488977688247136   0.488675712582701

  Columns 6 through 10

   0.488362420898951   0.488037274512748   0.487699704485605   0.487349109727696   0.486984854974611

  Columns 11 through 15

   0.486606268627968   0.486212640450258   0.485803219103447   0.485377209520252   0.484933770095925

  Columns 16 through 20

   0.484472009687414   0.483990984405784   0.483489694186365   0.482967079119920   0.482422015526537

  Columns 21 through 25

   0.481853311752198   0.481259703666381   0.480639849836700   0.479992326354637   0.479315621283799

  Columns 26 through 30

   0.478608128699700   0.477868142287169   0.477093848458857   0.476283318955403   0.475434502885383

  Columns 31 through 35

   0.474545218161075   0.473613142284907   0.472635802441796   0.471610564855056   0.470534623369671

  Columns 36 through 40

   0.469404987237633   0.468218468098278   0.466971666175213   0.465660955754069   0.464282470068607

  Columns 41 through 45

   0.462832085812781   0.461305407624856   0.459697753068055   0.458004138879409   0.456219269595147

  Columns 46 through 50

   0.454337530115074   0.452352984373670   0.450259383078563   0.448050184498919   0.445718593569514

  Columns 51 through 55

   0.443257626136169   0.440660206973816   0.437919312142165                   0                   0

  Columns 56 through 60

                   0                   0                   0                   0                   0

  Column 61

                   0


outer_code_BER =

  Columns 1 through 5

   0.489820688674564   0.489549705525477   0.489268858097169   0.488977688247135   0.488675712582702

  Columns 6 through 10

   0.488362420898951   0.488037274512748   0.487699704485607   0.487349109727698   0.486984854974612

  Columns 11 through 15

   0.486606268627969   0.486212640450258   0.485803219103448   0.485377209520253   0.484933770095926

  Columns 16 through 20

   0.484472009687414   0.483990984405785   0.483489694186365   0.482967079119922   0.482422015526536

  Columns 21 through 25

   0.481853311752198   0.481259703666382   0.480639849836701   0.479992326354637   0.479315621283799

  Columns 26 through 30

   0.478608128699701   0.477868142287170   0.477093848458857   0.476283318955404   0.475434502885383

  Columns 31 through 35

   0.474545218161073   0.473613142284907   0.472635802441797   0.471610564855057   0.470534623369670

  Columns 36 through 40

   0.469404987237633   0.468218468098278   0.466971666175214   0.465660955754068   0.464282470068608

  Columns 41 through 45

   0.462832085812780   0.461305407624856   0.459697753068056   0.458004138879409   0.456219269595148

  Columns 46 through 50

   0.454337530115074   0.452352984373670   0.450259383078563   0.448050184498919   0.445718593569514

  Columns 51 through 55

   0.443257626136169   0.440660206973818   0.437919312142166                   0                   0

  Columns 56 through 60

                   0                   0                   0                   0                   0

  Column 61

                   0


inner_code_BER =

  Columns 1 through 5

   0.489820688674564   0.489549705525477   0.489268858097167   0.488977688247136   0.488675712582701

  Columns 6 through 10

   0.488362420898951   0.488037274512748   0.487699704485605   0.487349109727696   0.486984854974611

  Columns 11 through 15

   0.486606268627968   0.486212640450258   0.485803219103447   0.485377209520252   0.484933770095925

  Columns 16 through 20

   0.484472009687414   0.483990984405784   0.483489694186365   0.482967079119920   0.482422015526537

  Columns 21 through 25

   0.481853311752198   0.481259703666381   0.480639849836700   0.479992326354637   0.479315621283799

  Columns 26 through 30

   0.478608128699700   0.477868142287169   0.477093848458857   0.476283318955403   0.475434502885383

  Columns 31 through 35

   0.474545218161075   0.473613142284907   0.472635802441796   0.471610564855056   0.470534623369671

  Columns 36 through 40

   0.469404987237633   0.468218468098278   0.466971666175213   0.465660955754069   0.464282470068607

  Columns 41 through 45

   0.462832085812781   0.461305407624856   0.459697753068055   0.458004138879409   0.456219269595147

  Columns 46 through 50

   0.454337530115074   0.452352984373670   0.450259383078563   0.448050184498919   0.445718593569514

  Columns 51 through 55

   0.443257626136169   0.440660206973816   0.437919312142165   0.435028168038291                   0

  Columns 56 through 60

                   0                   0                   0                   0                   0

  Column 61

                   0


outer_code_BER =

  Columns 1 through 5

   0.489820688674564   0.489549705525477   0.489268858097169   0.488977688247135   0.488675712582702

  Columns 6 through 10

   0.488362420898951   0.488037274512748   0.487699704485607   0.487349109727698   0.486984854974612

  Columns 11 through 15

   0.486606268627969   0.486212640450258   0.485803219103448   0.485377209520253   0.484933770095926

  Columns 16 through 20

   0.484472009687414   0.483990984405785   0.483489694186365   0.482967079119922   0.482422015526536

  Columns 21 through 25

   0.481853311752198   0.481259703666382   0.480639849836701   0.479992326354637   0.479315621283799

  Columns 26 through 30

   0.478608128699701   0.477868142287170   0.477093848458857   0.476283318955404   0.475434502885383

  Columns 31 through 35

   0.474545218161073   0.473613142284907   0.472635802441797   0.471610564855057   0.470534623369670

  Columns 36 through 40

   0.469404987237633   0.468218468098278   0.466971666175214   0.465660955754068   0.464282470068608

  Columns 41 through 45

   0.462832085812780   0.461305407624856   0.459697753068056   0.458004138879409   0.456219269595148

  Columns 46 through 50

   0.454337530115074   0.452352984373670   0.450259383078563   0.448050184498919   0.445718593569514

  Columns 51 through 55

   0.443257626136169   0.440660206973818   0.437919312142166   0.435028168038292                   0

  Columns 56 through 60

                   0                   0                   0                   0                   0

  Column 61

                   0


inner_code_BER =

  Columns 1 through 5

   0.489820688674564   0.489549705525477   0.489268858097167   0.488977688247136   0.488675712582701

  Columns 6 through 10

   0.488362420898951   0.488037274512748   0.487699704485605   0.487349109727696   0.486984854974611

  Columns 11 through 15

   0.486606268627968   0.486212640450258   0.485803219103447   0.485377209520252   0.484933770095925

  Columns 16 through 20

   0.484472009687414   0.483990984405784   0.483489694186365   0.482967079119920   0.482422015526537

  Columns 21 through 25

   0.481853311752198   0.481259703666381   0.480639849836700   0.479992326354637   0.479315621283799

  Columns 26 through 30

   0.478608128699700   0.477868142287169   0.477093848458857   0.476283318955403   0.475434502885383

  Columns 31 through 35

   0.474545218161075   0.473613142284907   0.472635802441796   0.471610564855056   0.470534623369671

  Columns 36 through 40

   0.469404987237633   0.468218468098278   0.466971666175213   0.465660955754069   0.464282470068607

  Columns 41 through 45

   0.462832085812781   0.461305407624856   0.459697753068055   0.458004138879409   0.456219269595147

  Columns 46 through 50

   0.454337530115074   0.452352984373670   0.450259383078563   0.448050184498919   0.445718593569514

  Columns 51 through 55

   0.443257626136169   0.440660206973816   0.437919312142165   0.435028168038291   0.431980520654407

  Columns 56 through 60

                   0                   0                   0                   0                   0

  Column 61

                   0


outer_code_BER =

  Columns 1 through 5

   0.489820688674564   0.489549705525477   0.489268858097169   0.488977688247135   0.488675712582702

  Columns 6 through 10

   0.488362420898951   0.488037274512748   0.487699704485607   0.487349109727698   0.486984854974612

  Columns 11 through 15

   0.486606268627969   0.486212640450258   0.485803219103448   0.485377209520253   0.484933770095926

  Columns 16 through 20

   0.484472009687414   0.483990984405785   0.483489694186365   0.482967079119922   0.482422015526536

  Columns 21 through 25

   0.481853311752198   0.481259703666382   0.480639849836701   0.479992326354637   0.479315621283799

  Columns 26 through 30

   0.478608128699701   0.477868142287170   0.477093848458857   0.476283318955404   0.475434502885383

  Columns 31 through 35

   0.474545218161073   0.473613142284907   0.472635802441797   0.471610564855057   0.470534623369670

  Columns 36 through 40

   0.469404987237633   0.468218468098278   0.466971666175214   0.465660955754068   0.464282470068608

  Columns 41 through 45

   0.462832085812780   0.461305407624856   0.459697753068056   0.458004138879409   0.456219269595148

  Columns 46 through 50

   0.454337530115074   0.452352984373670   0.450259383078563   0.448050184498919   0.445718593569514

  Columns 51 through 55

   0.443257626136169   0.440660206973818   0.437919312142166   0.435028168038292   0.431980520654407

  Columns 56 through 60

                   0                   0                   0                   0                   0

  Column 61

                   0


inner_code_BER =

  Columns 1 through 5

   0.489820688674564   0.489549705525477   0.489268858097167   0.488977688247136   0.488675712582701

  Columns 6 through 10

   0.488362420898951   0.488037274512748   0.487699704485605   0.487349109727696   0.486984854974611

  Columns 11 through 15

   0.486606268627968   0.486212640450258   0.485803219103447   0.485377209520252   0.484933770095925

  Columns 16 through 20

   0.484472009687414   0.483990984405784   0.483489694186365   0.482967079119920   0.482422015526537

  Columns 21 through 25

   0.481853311752198   0.481259703666381   0.480639849836700   0.479992326354637   0.479315621283799

  Columns 26 through 30

   0.478608128699700   0.477868142287169   0.477093848458857   0.476283318955403   0.475434502885383

  Columns 31 through 35

   0.474545218161075   0.473613142284907   0.472635802441796   0.471610564855056   0.470534623369671

  Columns 36 through 40

   0.469404987237633   0.468218468098278   0.466971666175213   0.465660955754069   0.464282470068607

  Columns 41 through 45

   0.462832085812781   0.461305407624856   0.459697753068055   0.458004138879409   0.456219269595147

  Columns 46 through 50

   0.454337530115074   0.452352984373670   0.450259383078563   0.448050184498919   0.445718593569514

  Columns 51 through 55

   0.443257626136169   0.440660206973816   0.437919312142165   0.435028168038291   0.431980520654407

  Columns 56 through 60

   0.428770988205055                   0                   0                   0                   0

  Column 61

                   0


outer_code_BER =

  Columns 1 through 5

   0.489820688674564   0.489549705525477   0.489268858097169   0.488977688247135   0.488675712582702

  Columns 6 through 10

   0.488362420898951   0.488037274512748   0.487699704485607   0.487349109727698   0.486984854974612

  Columns 11 through 15

   0.486606268627969   0.486212640450258   0.485803219103448   0.485377209520253   0.484933770095926

  Columns 16 through 20

   0.484472009687414   0.483990984405785   0.483489694186365   0.482967079119922   0.482422015526536

  Columns 21 through 25

   0.481853311752198   0.481259703666382   0.480639849836701   0.479992326354637   0.479315621283799

  Columns 26 through 30

   0.478608128699701   0.477868142287170   0.477093848458857   0.476283318955404   0.475434502885383

  Columns 31 through 35

   0.474545218161073   0.473613142284907   0.472635802441797   0.471610564855057   0.470534623369670

  Columns 36 through 40

   0.469404987237633   0.468218468098278   0.466971666175214   0.465660955754068   0.464282470068608

  Columns 41 through 45

   0.462832085812780   0.461305407624856   0.459697753068056   0.458004138879409   0.456219269595148

  Columns 46 through 50

   0.454337530115074   0.452352984373670   0.450259383078563   0.448050184498919   0.445718593569514

  Columns 51 through 55

   0.443257626136169   0.440660206973818   0.437919312142166   0.435028168038292   0.431980520654407

  Columns 56 through 60

   0.428770988205057                   0                   0                   0                   0

  Column 61

                   0


inner_code_BER =

  Columns 1 through 5

   0.489820688674564   0.489549705525477   0.489268858097167   0.488977688247136   0.488675712582701

  Columns 6 through 10

   0.488362420898951   0.488037274512748   0.487699704485605   0.487349109727696   0.486984854974611

  Columns 11 through 15

   0.486606268627968   0.486212640450258   0.485803219103447   0.485377209520252   0.484933770095925

  Columns 16 through 20

   0.484472009687414   0.483990984405784   0.483489694186365   0.482967079119920   0.482422015526537

  Columns 21 through 25

   0.481853311752198   0.481259703666381   0.480639849836700   0.479992326354637   0.479315621283799

  Columns 26 through 30

   0.478608128699700   0.477868142287169   0.477093848458857   0.476283318955403   0.475434502885383

  Columns 31 through 35

   0.474545218161075   0.473613142284907   0.472635802441796   0.471610564855056   0.470534623369671

  Columns 36 through 40

   0.469404987237633   0.468218468098278   0.466971666175213   0.465660955754069   0.464282470068607

  Columns 41 through 45

   0.462832085812781   0.461305407624856   0.459697753068055   0.458004138879409   0.456219269595147

  Columns 46 through 50

   0.454337530115074   0.452352984373670   0.450259383078563   0.448050184498919   0.445718593569514

  Columns 51 through 55

   0.443257626136169   0.440660206973816   0.437919312142165   0.435028168038291   0.431980520654407

  Columns 56 through 60

   0.428770988205055   0.425395507176334                   0                   0                   0

  Column 61

                   0


outer_code_BER =

  Columns 1 through 5

   0.489820688674564   0.489549705525477   0.489268858097169   0.488977688247135   0.488675712582702

  Columns 6 through 10

   0.488362420898951   0.488037274512748   0.487699704485607   0.487349109727698   0.486984854974612

  Columns 11 through 15

   0.486606268627969   0.486212640450258   0.485803219103448   0.485377209520253   0.484933770095926

  Columns 16 through 20

   0.484472009687414   0.483990984405785   0.483489694186365   0.482967079119922   0.482422015526536

  Columns 21 through 25

   0.481853311752198   0.481259703666382   0.480639849836701   0.479992326354637   0.479315621283799

  Columns 26 through 30

   0.478608128699701   0.477868142287170   0.477093848458857   0.476283318955404   0.475434502885383

  Columns 31 through 35

   0.474545218161073   0.473613142284907   0.472635802441797   0.471610564855057   0.470534623369670

  Columns 36 through 40

   0.469404987237633   0.468218468098278   0.466971666175214   0.465660955754068   0.464282470068608

  Columns 41 through 45

   0.462832085812780   0.461305407624856   0.459697753068056   0.458004138879409   0.456219269595148

  Columns 46 through 50

   0.454337530115074   0.452352984373670   0.450259383078563   0.448050184498919   0.445718593569514

  Columns 51 through 55

   0.443257626136169   0.440660206973818   0.437919312142166   0.435028168038292   0.431980520654407

  Columns 56 through 60

   0.428770988205057   0.425395507176334                   0                   0                   0

  Column 61

                   0


inner_code_BER =

  Columns 1 through 5

   0.489820688674564   0.489549705525477   0.489268858097167   0.488977688247136   0.488675712582701

  Columns 6 through 10

   0.488362420898951   0.488037274512748   0.487699704485605   0.487349109727696   0.486984854974611

  Columns 11 through 15

   0.486606268627968   0.486212640450258   0.485803219103447   0.485377209520252   0.484933770095925

  Columns 16 through 20

   0.484472009687414   0.483990984405784   0.483489694186365   0.482967079119920   0.482422015526537

  Columns 21 through 25

   0.481853311752198   0.481259703666381   0.480639849836700   0.479992326354637   0.479315621283799

  Columns 26 through 30

   0.478608128699700   0.477868142287169   0.477093848458857   0.476283318955403   0.475434502885383

  Columns 31 through 35

   0.474545218161075   0.473613142284907   0.472635802441796   0.471610564855056   0.470534623369671

  Columns 36 through 40

   0.469404987237633   0.468218468098278   0.466971666175213   0.465660955754069   0.464282470068607

  Columns 41 through 45

   0.462832085812781   0.461305407624856   0.459697753068055   0.458004138879409   0.456219269595147

  Columns 46 through 50

   0.454337530115074   0.452352984373670   0.450259383078563   0.448050184498919   0.445718593569514

  Columns 51 through 55

   0.443257626136169   0.440660206973816   0.437919312142165   0.435028168038291   0.431980520654407

  Columns 56 through 60

   0.428770988205055   0.425395507176334   0.421851874281623                   0                   0

  Column 61

                   0


outer_code_BER =

  Columns 1 through 5

   0.489820688674564   0.489549705525477   0.489268858097169   0.488977688247135   0.488675712582702

  Columns 6 through 10

   0.488362420898951   0.488037274512748   0.487699704485607   0.487349109727698   0.486984854974612

  Columns 11 through 15

   0.486606268627969   0.486212640450258   0.485803219103448   0.485377209520253   0.484933770095926

  Columns 16 through 20

   0.484472009687414   0.483990984405785   0.483489694186365   0.482967079119922   0.482422015526536

  Columns 21 through 25

   0.481853311752198   0.481259703666382   0.480639849836701   0.479992326354637   0.479315621283799

  Columns 26 through 30

   0.478608128699701   0.477868142287170   0.477093848458857   0.476283318955404   0.475434502885383

  Columns 31 through 35

   0.474545218161073   0.473613142284907   0.472635802441797   0.471610564855057   0.470534623369670

  Columns 36 through 40

   0.469404987237633   0.468218468098278   0.466971666175214   0.465660955754068   0.464282470068608

  Columns 41 through 45

   0.462832085812780   0.461305407624856   0.459697753068056   0.458004138879409   0.456219269595148

  Columns 46 through 50

   0.454337530115074   0.452352984373670   0.450259383078563   0.448050184498919   0.445718593569514

  Columns 51 through 55

   0.443257626136169   0.440660206973818   0.437919312142166   0.435028168038292   0.431980520654407

  Columns 56 through 60

   0.428770988205057   0.425395507176334   0.421851874281625                   0                   0

  Column 61

                   0


inner_code_BER =

  Columns 1 through 5

   0.489820688674564   0.489549705525477   0.489268858097167   0.488977688247136   0.488675712582701

  Columns 6 through 10

   0.488362420898951   0.488037274512748   0.487699704485605   0.487349109727696   0.486984854974611

  Columns 11 through 15

   0.486606268627968   0.486212640450258   0.485803219103447   0.485377209520252   0.484933770095925

  Columns 16 through 20

   0.484472009687414   0.483990984405784   0.483489694186365   0.482967079119920   0.482422015526537

  Columns 21 through 25

   0.481853311752198   0.481259703666381   0.480639849836700   0.479992326354637   0.479315621283799

  Columns 26 through 30

   0.478608128699700   0.477868142287169   0.477093848458857   0.476283318955403   0.475434502885383

  Columns 31 through 35

   0.474545218161075   0.473613142284907   0.472635802441796   0.471610564855056   0.470534623369671

  Columns 36 through 40

   0.469404987237633   0.468218468098278   0.466971666175213   0.465660955754069   0.464282470068607

  Columns 41 through 45

   0.462832085812781   0.461305407624856   0.459697753068055   0.458004138879409   0.456219269595147

  Columns 46 through 50

   0.454337530115074   0.452352984373670   0.450259383078563   0.448050184498919   0.445718593569514

  Columns 51 through 55

   0.443257626136169   0.440660206973816   0.437919312142165   0.435028168038291   0.431980520654407

  Columns 56 through 60

   0.428770988205055   0.425395507176334   0.421851874281623   0.418140372931814                   0

  Column 61

                   0


outer_code_BER =

  Columns 1 through 5

   0.489820688674564   0.489549705525477   0.489268858097169   0.488977688247135   0.488675712582702

  Columns 6 through 10

   0.488362420898951   0.488037274512748   0.487699704485607   0.487349109727698   0.486984854974612

  Columns 11 through 15

   0.486606268627969   0.486212640450258   0.485803219103448   0.485377209520253   0.484933770095926

  Columns 16 through 20

   0.484472009687414   0.483990984405785   0.483489694186365   0.482967079119922   0.482422015526536

  Columns 21 through 25

   0.481853311752198   0.481259703666382   0.480639849836701   0.479992326354637   0.479315621283799

  Columns 26 through 30

   0.478608128699701   0.477868142287170   0.477093848458857   0.476283318955404   0.475434502885383

  Columns 31 through 35

   0.474545218161073   0.473613142284907   0.472635802441797   0.471610564855057   0.470534623369670

  Columns 36 through 40

   0.469404987237633   0.468218468098278   0.466971666175214   0.465660955754068   0.464282470068608

  Columns 41 through 45

   0.462832085812780   0.461305407624856   0.459697753068056   0.458004138879409   0.456219269595148

  Columns 46 through 50

   0.454337530115074   0.452352984373670   0.450259383078563   0.448050184498919   0.445718593569514

  Columns 51 through 55

   0.443257626136169   0.440660206973818   0.437919312142166   0.435028168038292   0.431980520654407

  Columns 56 through 60

   0.428770988205057   0.425395507176334   0.421851874281625   0.418140372931813                   0

  Column 61

                   0


inner_code_BER =

  Columns 1 through 5

   0.489820688674564   0.489549705525477   0.489268858097167   0.488977688247136   0.488675712582701

  Columns 6 through 10

   0.488362420898951   0.488037274512748   0.487699704485605   0.487349109727696   0.486984854974611

  Columns 11 through 15

   0.486606268627968   0.486212640450258   0.485803219103447   0.485377209520252   0.484933770095925

  Columns 16 through 20

   0.484472009687414   0.483990984405784   0.483489694186365   0.482967079119920   0.482422015526537

  Columns 21 through 25

   0.481853311752198   0.481259703666381   0.480639849836700   0.479992326354637   0.479315621283799

  Columns 26 through 30

   0.478608128699700   0.477868142287169   0.477093848458857   0.476283318955403   0.475434502885383

  Columns 31 through 35

   0.474545218161075   0.473613142284907   0.472635802441796   0.471610564855056   0.470534623369671

  Columns 36 through 40

   0.469404987237633   0.468218468098278   0.466971666175213   0.465660955754069   0.464282470068607

  Columns 41 through 45

   0.462832085812781   0.461305407624856   0.459697753068055   0.458004138879409   0.456219269595147

  Columns 46 through 50

   0.454337530115074   0.452352984373670   0.450259383078563   0.448050184498919   0.445718593569514

  Columns 51 through 55

   0.443257626136169   0.440660206973816   0.437919312142165   0.435028168038291   0.431980520654407

  Columns 56 through 60

   0.428770988205055   0.425395507176334   0.421851874281623   0.418140372931814   0.414264451317059

  Column 61

                   0


outer_code_BER =

  Columns 1 through 5

   0.489820688674564   0.489549705525477   0.489268858097169   0.488977688247135   0.488675712582702

  Columns 6 through 10

   0.488362420898951   0.488037274512748   0.487699704485607   0.487349109727698   0.486984854974612

  Columns 11 through 15

   0.486606268627969   0.486212640450258   0.485803219103448   0.485377209520253   0.484933770095926

  Columns 16 through 20

   0.484472009687414   0.483990984405785   0.483489694186365   0.482967079119922   0.482422015526536

  Columns 21 through 25

   0.481853311752198   0.481259703666382   0.480639849836701   0.479992326354637   0.479315621283799

  Columns 26 through 30

   0.478608128699701   0.477868142287170   0.477093848458857   0.476283318955404   0.475434502885383

  Columns 31 through 35

   0.474545218161073   0.473613142284907   0.472635802441797   0.471610564855057   0.470534623369670

  Columns 36 through 40

   0.469404987237633   0.468218468098278   0.466971666175214   0.465660955754068   0.464282470068608

  Columns 41 through 45

   0.462832085812780   0.461305407624856   0.459697753068056   0.458004138879409   0.456219269595148

  Columns 46 through 50

   0.454337530115074   0.452352984373670   0.450259383078563   0.448050184498919   0.445718593569514

  Columns 51 through 55

   0.443257626136169   0.440660206973818   0.437919312142166   0.435028168038292   0.431980520654407

  Columns 56 through 60

   0.428770988205057   0.425395507176334   0.421851874281625   0.418140372931813   0.414264451317058

  Column 61

                   0


inner_code_BER =

  Columns 1 through 5

   0.489820688674564   0.489549705525477   0.489268858097167   0.488977688247136   0.488675712582701

  Columns 6 through 10

   0.488362420898951   0.488037274512748   0.487699704485605   0.487349109727696   0.486984854974611

  Columns 11 through 15

   0.486606268627968   0.486212640450258   0.485803219103447   0.485377209520252   0.484933770095925

  Columns 16 through 20

   0.484472009687414   0.483990984405784   0.483489694186365   0.482967079119920   0.482422015526537

  Columns 21 through 25

   0.481853311752198   0.481259703666381   0.480639849836700   0.479992326354637   0.479315621283799

  Columns 26 through 30

   0.478608128699700   0.477868142287169   0.477093848458857   0.476283318955403   0.475434502885383

  Columns 31 through 35

   0.474545218161075   0.473613142284907   0.472635802441796   0.471610564855056   0.470534623369671

  Columns 36 through 40

   0.469404987237633   0.468218468098278   0.466971666175213   0.465660955754069   0.464282470068607

  Columns 41 through 45

   0.462832085812781   0.461305407624856   0.459697753068055   0.458004138879409   0.456219269595147

  Columns 46 through 50

   0.454337530115074   0.452352984373670   0.450259383078563   0.448050184498919   0.445718593569514

  Columns 51 through 55

   0.443257626136169   0.440660206973816   0.437919312142165   0.435028168038291   0.431980520654407

  Columns 56 through 60

   0.428770988205055   0.425395507176334   0.421851874281623   0.418140372931814   0.414264451317059

  Column 61

   0.410231390526724


outer_code_BER =

  Columns 1 through 5

   0.489820688674564   0.489549705525477   0.489268858097169   0.488977688247135   0.488675712582702

  Columns 6 through 10

   0.488362420898951   0.488037274512748   0.487699704485607   0.487349109727698   0.486984854974612

  Columns 11 through 15

   0.486606268627969   0.486212640450258   0.485803219103448   0.485377209520253   0.484933770095926

  Columns 16 through 20

   0.484472009687414   0.483990984405785   0.483489694186365   0.482967079119922   0.482422015526536

  Columns 21 through 25

   0.481853311752198   0.481259703666382   0.480639849836701   0.479992326354637   0.479315621283799

  Columns 26 through 30

   0.478608128699701   0.477868142287170   0.477093848458857   0.476283318955404   0.475434502885383

  Columns 31 through 35

   0.474545218161073   0.473613142284907   0.472635802441797   0.471610564855057   0.470534623369670

  Columns 36 through 40

   0.469404987237633   0.468218468098278   0.466971666175214   0.465660955754068   0.464282470068608

  Columns 41 through 45

   0.462832085812780   0.461305407624856   0.459697753068056   0.458004138879409   0.456219269595148

  Columns 46 through 50

   0.454337530115074   0.452352984373670   0.450259383078563   0.448050184498919   0.445718593569514

  Columns 51 through 55

   0.443257626136169   0.440660206973818   0.437919312142166   0.435028168038292   0.431980520654407

  Columns 56 through 60

   0.428770988205057   0.425395507176334   0.421851874281625   0.418140372931813   0.414264451317058

  Column 61

   0.410231390526724

Elapsed time is 49308.965704 seconds.
