# Supplementary material for: An Efficient Design of Systematic Rateless Codes
Source: Hindawi journal article supplement (doi:10.1155/2020/8068414), 2020-05-19
Supplement: f1 [file 8068414.f1.zip › supplementary files/Matlab_code_for_Figure1/BER_by_DDE/仿真结果/BER_by_DDE_rayl_rate_1_2_dist0_Ns.txt]

µ±Ç°ÐÅµÀÎªÈðÀûÐÅµÀ

EbN0indB_vec =

  Columns 1 through 5

                   0   0.100000000000000   0.200000000000000   0.300000000000000   0.400000000000000

  Columns 6 through 10

   0.500000000000000   0.600000000000000   0.700000000000000   0.800000000000000   0.900000000000000

  Columns 11 through 15

   1.000000000000000   1.100000000000000   1.200000000000000   1.300000000000000   1.400000000000000

  Columns 16 through 20

   1.500000000000000   1.600000000000000   1.700000000000000   1.800000000000000   1.900000000000000

  Columns 21 through 25

   2.000000000000000   2.100000000000000   2.200000000000000   2.300000000000000   2.400000000000000

  Columns 26 through 30

   2.500000000000000   2.600000000000000   2.700000000000000   2.800000000000000   2.900000000000000

  Columns 31 through 35

   3.000000000000000   3.100000000000000   3.200000000000000   3.300000000000000   3.400000000000000

  Columns 36 through 40

   3.500000000000000   3.600000000000000   3.700000000000000   3.800000000000000   3.900000000000000

  Columns 41 through 45

   4.000000000000000   4.100000000000000   4.200000000000000   4.300000000000000   4.400000000000000

  Columns 46 through 50

   4.500000000000000   4.600000000000000   4.700000000000000   4.800000000000000   4.900000000000000

  Columns 51 through 55

   5.000000000000000   5.100000000000000   5.200000000000000   5.300000000000000   5.400000000000000

  Columns 56 through 60

   5.500000000000000   5.600000000000000   5.700000000000000   5.800000000000000   5.900000000000000

  Column 61

   6.000000000000000

ÖÆ±í³É¹¦
µ±Ç°Ñ¡ÔñRaptorÂëµ±Ç°Ñ¡Ôñ·ÇÏµÍ³Âë
×ÜÂëÂÊ=0.50000, ÍâÂëÂëÂÊ=0.98039, ÄÚÂëÂëÂÊ=0.51000

out_node_index =

     1     2     3     4     5     8     9    19    65    66


ans =

  Columns 1 through 5

   0.007969000000000   0.493570000000000   0.166220000000000   0.072646000000000   0.082558000000000

  Columns 6 through 10

   0.056058000000000   0.037229000000000   0.055590000000000   0.025023000000000   0.003135000000000


inner_code_BER =

  Columns 1 through 5

   0.442059265299197                   0                   0                   0                   0

  Columns 6 through 10

                   0                   0                   0                   0                   0

  Columns 11 through 15

                   0                   0                   0                   0                   0

  Columns 16 through 20

                   0                   0                   0                   0                   0

  Columns 21 through 25

                   0                   0                   0                   0                   0

  Columns 26 through 30

                   0                   0                   0                   0                   0

  Columns 31 through 35

                   0                   0                   0                   0                   0

  Columns 36 through 40

                   0                   0                   0                   0                   0

  Columns 41 through 45

                   0                   0                   0                   0                   0

  Columns 46 through 50

                   0                   0                   0                   0                   0

  Columns 51 through 55

                   0                   0                   0                   0                   0

  Columns 56 through 60

                   0                   0                   0                   0                   0

  Column 61

                   0


outer_code_BER =

  Columns 1 through 5

   0.442059265299198                   0                   0                   0                   0

  Columns 6 through 10

                   0                   0                   0                   0                   0

  Columns 11 through 15

                   0                   0                   0                   0                   0

  Columns 16 through 20

                   0                   0                   0                   0                   0

  Columns 21 through 25

                   0                   0                   0                   0                   0

  Columns 26 through 30

                   0                   0                   0                   0                   0

  Columns 31 through 35

                   0                   0                   0                   0                   0

  Columns 36 through 40

                   0                   0                   0                   0                   0

  Columns 41 through 45

                   0                   0                   0                   0                   0

  Columns 46 through 50

                   0                   0                   0                   0                   0

  Columns 51 through 55

                   0                   0                   0                   0                   0

  Columns 56 through 60

                   0                   0                   0                   0                   0

  Column 61

                   0


inner_code_BER =

  Columns 1 through 5

   0.442059265299197   0.438495140517212                   0                   0                   0

  Columns 6 through 10

                   0                   0                   0                   0                   0

  Columns 11 through 15

                   0                   0                   0                   0                   0

  Columns 16 through 20

                   0                   0                   0                   0                   0

  Columns 21 through 25

                   0                   0                   0                   0                   0

  Columns 26 through 30

                   0                   0                   0                   0                   0

  Columns 31 through 35

                   0                   0                   0                   0                   0

  Columns 36 through 40

                   0                   0                   0                   0                   0

  Columns 41 through 45

                   0                   0                   0                   0                   0

  Columns 46 through 50

                   0                   0                   0                   0                   0

  Columns 51 through 55

                   0                   0                   0                   0                   0

  Columns 56 through 60

                   0                   0                   0                   0                   0

  Column 61

                   0


outer_code_BER =

  Columns 1 through 5

   0.442059265299198   0.438495140517214                   0                   0                   0

  Columns 6 through 10

                   0                   0                   0                   0                   0

  Columns 11 through 15

                   0                   0                   0                   0                   0

  Columns 16 through 20

                   0                   0                   0                   0                   0

  Columns 21 through 25

                   0                   0                   0                   0                   0

  Columns 26 through 30

                   0                   0                   0                   0                   0

  Columns 31 through 35

                   0                   0                   0                   0                   0

  Columns 36 through 40

                   0                   0                   0                   0                   0

  Columns 41 through 45

                   0                   0                   0                   0                   0

  Columns 46 through 50

                   0                   0                   0                   0                   0

  Columns 51 through 55

                   0                   0                   0                   0                   0

  Columns 56 through 60

                   0                   0                   0                   0                   0

  Column 61

                   0


inner_code_BER =

  Columns 1 through 5

   0.442059265299197   0.438495140517212   0.434577689968610                   0                   0

  Columns 6 through 10

                   0                   0                   0                   0                   0

  Columns 11 through 15

                   0                   0                   0                   0                   0

  Columns 16 through 20

                   0                   0                   0                   0                   0

  Columns 21 through 25

                   0                   0                   0                   0                   0

  Columns 26 through 30

                   0                   0                   0                   0                   0

  Columns 31 through 35

                   0                   0                   0                   0                   0

  Columns 36 through 40

                   0                   0                   0                   0                   0

  Columns 41 through 45

                   0                   0                   0                   0                   0

  Columns 46 through 50

                   0                   0                   0                   0                   0

  Columns 51 through 55

                   0                   0                   0                   0                   0

  Columns 56 through 60

                   0                   0                   0                   0                   0

  Column 61

                   0


outer_code_BER =

  Columns 1 through 5

   0.442059265299198   0.438495140517214   0.434577689968611                   0                   0

  Columns 6 through 10

                   0                   0                   0                   0                   0

  Columns 11 through 15

                   0                   0                   0                   0                   0

  Columns 16 through 20

                   0                   0                   0                   0                   0

  Columns 21 through 25

                   0                   0                   0                   0                   0

  Columns 26 through 30

                   0                   0                   0                   0                   0

  Columns 31 through 35

                   0                   0                   0                   0                   0

  Columns 36 through 40

                   0                   0                   0                   0                   0

  Columns 41 through 45

                   0                   0                   0                   0                   0

  Columns 46 through 50

                   0                   0                   0                   0                   0

  Columns 51 through 55

                   0                   0                   0                   0                   0

  Columns 56 through 60

                   0                   0                   0                   0                   0

  Column 61

                   0


inner_code_BER =

  Columns 1 through 5

   0.442059265299197   0.438495140517212   0.434577689968610   0.430249752007699                   0

  Columns 6 through 10

                   0                   0                   0                   0                   0

  Columns 11 through 15

                   0                   0                   0                   0                   0

  Columns 16 through 20

                   0                   0                   0                   0                   0

  Columns 21 through 25

                   0                   0                   0                   0                   0

  Columns 26 through 30

                   0                   0                   0                   0                   0

  Columns 31 through 35

                   0                   0                   0                   0                   0

  Columns 36 through 40

                   0                   0                   0                   0                   0

  Columns 41 through 45

                   0                   0                   0                   0                   0

  Columns 46 through 50

                   0                   0                   0                   0                   0

  Columns 51 through 55

                   0                   0                   0                   0                   0

  Columns 56 through 60

                   0                   0                   0                   0                   0

  Column 61

                   0


outer_code_BER =

  Columns 1 through 5

   0.442059265299198   0.438495140517214   0.434577689968611   0.430249752007699                   0

  Columns 6 through 10

                   0                   0                   0                   0                   0

  Columns 11 through 15

                   0                   0                   0                   0                   0

  Columns 16 through 20

                   0                   0                   0                   0                   0

  Columns 21 through 25

                   0                   0                   0                   0                   0

  Columns 26 through 30

                   0                   0                   0                   0                   0

  Columns 31 through 35

                   0                   0                   0                   0                   0

  Columns 36 through 40

                   0                   0                   0                   0                   0

  Columns 41 through 45

                   0                   0                   0                   0                   0

  Columns 46 through 50

                   0                   0                   0                   0                   0

  Columns 51 through 55

                   0                   0                   0                   0                   0

  Columns 56 through 60

                   0                   0                   0                   0                   0

  Column 61

                   0


inner_code_BER =

  Columns 1 through 5

   0.442059265299197   0.438495140517212   0.434577689968610   0.430249752007699   0.425440710275914

  Columns 6 through 10

                   0                   0                   0                   0                   0

  Columns 11 through 15

                   0                   0                   0                   0                   0

  Columns 16 through 20

                   0                   0                   0                   0                   0

  Columns 21 through 25

                   0                   0                   0                   0                   0

  Columns 26 through 30

                   0                   0                   0                   0                   0

  Columns 31 through 35

                   0                   0                   0                   0                   0

  Columns 36 through 40

                   0                   0                   0                   0                   0

  Columns 41 through 45

                   0                   0                   0                   0                   0

  Columns 46 through 50

                   0                   0                   0                   0                   0

  Columns 51 through 55

                   0                   0                   0                   0                   0

  Columns 56 through 60

                   0                   0                   0                   0                   0

  Column 61

                   0


outer_code_BER =

  Columns 1 through 5

   0.442059265299198   0.438495140517214   0.434577689968611   0.430249752007699   0.425440710275914

  Columns 6 through 10

                   0                   0                   0                   0                   0

  Columns 11 through 15

                   0                   0                   0                   0                   0

  Columns 16 through 20

                   0                   0                   0                   0                   0

  Columns 21 through 25

                   0                   0                   0                   0                   0

  Columns 26 through 30

                   0                   0                   0                   0                   0

  Columns 31 through 35

                   0                   0                   0                   0                   0

  Columns 36 through 40

                   0                   0                   0                   0                   0

  Columns 41 through 45

                   0                   0                   0                   0                   0

  Columns 46 through 50

                   0                   0                   0                   0                   0

  Columns 51 through 55

                   0                   0                   0                   0                   0

  Columns 56 through 60

                   0                   0                   0                   0                   0

  Column 61

                   0


inner_code_BER =

  Columns 1 through 5

   0.442059265299197   0.438495140517212   0.434577689968610   0.430249752007699   0.425440710275914

  Columns 6 through 10

   0.420062485950892                   0                   0                   0                   0

  Columns 11 through 15

                   0                   0                   0                   0                   0

  Columns 16 through 20

                   0                   0                   0                   0                   0

  Columns 21 through 25

                   0                   0                   0                   0                   0

  Columns 26 through 30

                   0                   0                   0                   0                   0

  Columns 31 through 35

                   0                   0                   0                   0                   0

  Columns 36 through 40

                   0                   0                   0                   0                   0

  Columns 41 through 45

                   0                   0                   0                   0                   0

  Columns 46 through 50

                   0                   0                   0                   0                   0

  Columns 51 through 55

                   0                   0                   0                   0                   0

  Columns 56 through 60

                   0                   0                   0                   0                   0

  Column 61

                   0


outer_code_BER =

  Columns 1 through 5

   0.442059265299198   0.438495140517214   0.434577689968611   0.430249752007699   0.425440710275914

  Columns 6 through 10

   0.420062485950892                   0                   0                   0                   0

  Columns 11 through 15

                   0                   0                   0                   0                   0

  Columns 16 through 20

                   0                   0                   0                   0                   0

  Columns 21 through 25

                   0                   0                   0                   0                   0

  Columns 26 through 30

                   0                   0                   0                   0                   0

  Columns 31 through 35

                   0                   0                   0                   0                   0

  Columns 36 through 40

                   0                   0                   0                   0                   0

  Columns 41 through 45

                   0                   0                   0                   0                   0

  Columns 46 through 50

                   0                   0                   0                   0                   0

  Columns 51 through 55

                   0                   0                   0                   0                   0

  Columns 56 through 60

                   0                   0                   0                   0                   0

  Column 61

                   0


inner_code_BER =

  Columns 1 through 5

   0.442059265299197   0.438495140517212   0.434577689968610   0.430249752007699   0.425440710275914

  Columns 6 through 10

   0.420062485950892   0.414004155827468                   0                   0                   0

  Columns 11 through 15

                   0                   0                   0                   0                   0

  Columns 16 through 20

                   0                   0                   0                   0                   0

  Columns 21 through 25

                   0                   0                   0                   0                   0

  Columns 26 through 30

                   0                   0                   0                   0                   0

  Columns 31 through 35

                   0                   0                   0                   0                   0

  Columns 36 through 40

                   0                   0                   0                   0                   0

  Columns 41 through 45

                   0                   0                   0                   0                   0

  Columns 46 through 50

                   0                   0                   0                   0                   0

  Columns 51 through 55

                   0                   0                   0                   0                   0

  Columns 56 through 60

                   0                   0                   0                   0                   0

  Column 61

                   0


outer_code_BER =

  Columns 1 through 5

   0.442059265299198   0.438495140517214   0.434577689968611   0.430249752007699   0.425440710275914

  Columns 6 through 10

   0.420062485950892   0.414004155827468                   0                   0                   0

  Columns 11 through 15

                   0                   0                   0                   0                   0

  Columns 16 through 20

                   0                   0                   0                   0                   0

  Columns 21 through 25

                   0                   0                   0                   0                   0

  Columns 26 through 30

                   0                   0                   0                   0                   0

  Columns 31 through 35

                   0                   0                   0                   0                   0

  Columns 36 through 40

                   0                   0                   0                   0                   0

  Columns 41 through 45

                   0                   0                   0                   0                   0

  Columns 46 through 50

                   0                   0                   0                   0                   0

  Columns 51 through 55

                   0                   0                   0                   0                   0

  Columns 56 through 60

                   0                   0                   0                   0                   0

  Column 61

                   0


inner_code_BER =

  Columns 1 through 5

   0.442059265299197   0.438495140517212   0.434577689968610   0.430249752007699   0.425440710275914

  Columns 6 through 10

   0.420062485950892   0.414004155827468   0.407124705156026                   0                   0

  Columns 11 through 15

                   0                   0                   0                   0                   0

  Columns 16 through 20

                   0                   0                   0                   0                   0

  Columns 21 through 25

                   0                   0                   0                   0                   0

  Columns 26 through 30

                   0                   0                   0                   0                   0

  Columns 31 through 35

                   0                   0                   0                   0                   0

  Columns 36 through 40

                   0                   0                   0                   0                   0

  Columns 41 through 45

                   0                   0                   0                   0                   0

  Columns 46 through 50

                   0                   0                   0                   0                   0

  Columns 51 through 55

                   0                   0                   0                   0                   0

  Columns 56 through 60

                   0                   0                   0                   0                   0

  Column 61

                   0


outer_code_BER =

  Columns 1 through 5

   0.442059265299198   0.438495140517214   0.434577689968611   0.430249752007699   0.425440710275914

  Columns 6 through 10

   0.420062485950892   0.414004155827468   0.407124705156027                   0                   0

  Columns 11 through 15

                   0                   0                   0                   0                   0

  Columns 16 through 20

                   0                   0                   0                   0                   0

  Columns 21 through 25

                   0                   0                   0                   0                   0

  Columns 26 through 30

                   0                   0                   0                   0                   0

  Columns 31 through 35

                   0                   0                   0                   0                   0

  Columns 36 through 40

                   0                   0                   0                   0                   0

  Columns 41 through 45

                   0                   0                   0                   0                   0

  Columns 46 through 50

                   0                   0                   0                   0                   0

  Columns 51 through 55

                   0                   0                   0                   0                   0

  Columns 56 through 60

                   0                   0                   0                   0                   0

  Column 61

                   0


inner_code_BER =

  Columns 1 through 5

   0.442059265299197   0.438495140517212   0.434577689968610   0.430249752007699   0.425440710275914

  Columns 6 through 10

   0.420062485950892   0.414004155827468   0.407124705156026   0.399243281233111                   0

  Columns 11 through 15

                   0                   0                   0                   0                   0

  Columns 16 through 20

                   0                   0                   0                   0                   0

  Columns 21 through 25

                   0                   0                   0                   0                   0

  Columns 26 through 30

                   0                   0                   0                   0                   0

  Columns 31 through 35

                   0                   0                   0                   0                   0

  Columns 36 through 40

                   0                   0                   0                   0                   0

  Columns 41 through 45

                   0                   0                   0                   0                   0

  Columns 46 through 50

                   0                   0                   0                   0                   0

  Columns 51 through 55

                   0                   0                   0                   0                   0

  Columns 56 through 60

                   0                   0                   0                   0                   0

  Column 61

                   0


outer_code_BER =

  Columns 1 through 5

   0.442059265299198   0.438495140517214   0.434577689968611   0.430249752007699   0.425440710275914

  Columns 6 through 10

   0.420062485950892   0.414004155827468   0.407124705156027   0.399243281233112                   0

  Columns 11 through 15

                   0                   0                   0                   0                   0

  Columns 16 through 20

                   0                   0                   0                   0                   0

  Columns 21 through 25

                   0                   0                   0                   0                   0

  Columns 26 through 30

                   0                   0                   0                   0                   0

  Columns 31 through 35

                   0                   0                   0                   0                   0

  Columns 36 through 40

                   0                   0                   0                   0                   0

  Columns 41 through 45

                   0                   0                   0                   0                   0

  Columns 46 through 50

                   0                   0                   0                   0                   0

  Columns 51 through 55

                   0                   0                   0                   0                   0

  Columns 56 through 60

                   0                   0                   0                   0                   0

  Column 61

                   0


inner_code_BER =

  Columns 1 through 5

   0.442059265299197   0.438495140517212   0.434577689968610   0.430249752007699   0.425440710275914

  Columns 6 through 10

   0.420062485950892   0.414004155827468   0.407124705156026   0.399243281233111   0.390126191111209

  Columns 11 through 15

                   0                   0                   0                   0                   0

  Columns 16 through 20

                   0                   0                   0                   0                   0

  Columns 21 through 25

                   0                   0                   0                   0                   0

  Columns 26 through 30

                   0                   0                   0                   0                   0

  Columns 31 through 35

                   0                   0                   0                   0                   0

  Columns 36 through 40

                   0                   0                   0                   0                   0

  Columns 41 through 45

                   0                   0                   0                   0                   0

  Columns 46 through 50

                   0                   0                   0                   0                   0

  Columns 51 through 55

                   0                   0                   0                   0                   0

  Columns 56 through 60

                   0                   0                   0                   0                   0

  Column 61

                   0


outer_code_BER =

  Columns 1 through 5

   0.442059265299198   0.438495140517214   0.434577689968611   0.430249752007699   0.425440710275914

  Columns 6 through 10

   0.420062485950892   0.414004155827468   0.407124705156027   0.399243281233112   0.390126191111211

  Columns 11 through 15

                   0                   0                   0                   0                   0

  Columns 16 through 20

                   0                   0                   0                   0                   0

  Columns 21 through 25

                   0                   0                   0                   0                   0

  Columns 26 through 30

                   0                   0                   0                   0                   0

  Columns 31 through 35

                   0                   0                   0                   0                   0

  Columns 36 through 40

                   0                   0                   0                   0                   0

  Columns 41 through 45

                   0                   0                   0                   0                   0

  Columns 46 through 50

                   0                   0                   0                   0                   0

  Columns 51 through 55

                   0                   0                   0                   0                   0

  Columns 56 through 60

                   0                   0                   0                   0                   0

  Column 61

                   0


inner_code_BER =

  Columns 1 through 5

   0.442059265299197   0.438495140517212   0.434577689968610   0.430249752007699   0.425440710275914

  Columns 6 through 10

   0.420062485950892   0.414004155827468   0.407124705156026   0.399243281233111   0.390126191111209

  Columns 11 through 15

   0.379469900484071                   0                   0                   0                   0

  Columns 16 through 20

                   0                   0                   0                   0                   0

  Columns 21 through 25

                   0                   0                   0                   0                   0

  Columns 26 through 30

                   0                   0                   0                   0                   0

  Columns 31 through 35

                   0                   0                   0                   0                   0

  Columns 36 through 40

                   0                   0                   0                   0                   0

  Columns 41 through 45

                   0                   0                   0                   0                   0

  Columns 46 through 50

                   0                   0                   0                   0                   0

  Columns 51 through 55

                   0                   0                   0                   0                   0

  Columns 56 through 60

                   0                   0                   0                   0                   0

  Column 61

                   0


outer_code_BER =

  Columns 1 through 5

   0.442059265299198   0.438495140517214   0.434577689968611   0.430249752007699   0.425440710275914

  Columns 6 through 10

   0.420062485950892   0.414004155827468   0.407124705156027   0.399243281233112   0.390126191111211

  Columns 11 through 15

   0.379469900484071                   0                   0                   0                   0

  Columns 16 through 20

                   0                   0                   0                   0                   0

  Columns 21 through 25

                   0                   0                   0                   0                   0

  Columns 26 through 30

                   0                   0                   0                   0                   0

  Columns 31 through 35

                   0                   0                   0                   0                   0

  Columns 36 through 40

                   0                   0                   0                   0                   0

  Columns 41 through 45

                   0                   0                   0                   0                   0

  Columns 46 through 50

                   0                   0                   0                   0                   0

  Columns 51 through 55

                   0                   0                   0                   0                   0

  Columns 56 through 60

                   0                   0                   0                   0                   0

  Column 61

                   0


inner_code_BER =

  Columns 1 through 5

   0.442059265299197   0.438495140517212   0.434577689968610   0.430249752007699   0.425440710275914

  Columns 6 through 10

   0.420062485950892   0.414004155827468   0.407124705156026   0.399243281233111   0.390126191111209

  Columns 11 through 15

   0.379469900484071   0.366879750449458                   0                   0                   0

  Columns 16 through 20

                   0                   0                   0                   0                   0

  Columns 21 through 25

                   0                   0                   0                   0                   0

  Columns 26 through 30

                   0                   0                   0                   0                   0

  Columns 31 through 35

                   0                   0                   0                   0                   0

  Columns 36 through 40

                   0                   0                   0                   0                   0

  Columns 41 through 45

                   0                   0                   0                   0                   0

  Columns 46 through 50

                   0                   0                   0                   0                   0

  Columns 51 through 55

                   0                   0                   0                   0                   0

  Columns 56 through 60

                   0                   0                   0                   0                   0

  Column 61

                   0


outer_code_BER =

  Columns 1 through 5

   0.442059265299198   0.438495140517214   0.434577689968611   0.430249752007699   0.425440710275914

  Columns 6 through 10

   0.420062485950892   0.414004155827468   0.407124705156027   0.399243281233112   0.390126191111211

  Columns 11 through 15

   0.379469900484071   0.366879750449459                   0                   0                   0

  Columns 16 through 20

                   0                   0                   0                   0                   0

  Columns 21 through 25

                   0                   0                   0                   0                   0

  Columns 26 through 30

                   0                   0                   0                   0                   0

  Columns 31 through 35

                   0                   0                   0                   0                   0

  Columns 36 through 40

                   0                   0                   0                   0                   0

  Columns 41 through 45

                   0                   0                   0                   0                   0

  Columns 46 through 50

                   0                   0                   0                   0                   0

  Columns 51 through 55

                   0                   0                   0                   0                   0

  Columns 56 through 60

                   0                   0                   0                   0                   0

  Column 61

                   0


inner_code_BER =

  Columns 1 through 5

   0.442059265299197   0.438495140517212   0.434577689968610   0.430249752007699   0.425440710275914

  Columns 6 through 10

   0.420062485950892   0.414004155827468   0.407124705156026   0.399243281233111   0.390126191111209

  Columns 11 through 15

   0.379469900484071   0.366879750449458   0.351845805786628                   0                   0

  Columns 16 through 20

                   0                   0                   0                   0                   0

  Columns 21 through 25

                   0                   0                   0                   0                   0

  Columns 26 through 30

                   0                   0                   0                   0                   0

  Columns 31 through 35

                   0                   0                   0                   0                   0

  Columns 36 through 40

                   0                   0                   0                   0                   0

  Columns 41 through 45

                   0                   0                   0                   0                   0

  Columns 46 through 50

                   0                   0                   0                   0                   0

  Columns 51 through 55

                   0                   0                   0                   0                   0

  Columns 56 through 60

                   0                   0                   0                   0                   0

  Column 61

                   0


outer_code_BER =

  Columns 1 through 5

   0.442059265299198   0.438495140517214   0.434577689968611   0.430249752007699   0.425440710275914

  Columns 6 through 10

   0.420062485950892   0.414004155827468   0.407124705156027   0.399243281233112   0.390126191111211

  Columns 11 through 15

   0.379469900484071   0.366879750449459   0.351845805786628                   0                   0

  Columns 16 through 20

                   0                   0                   0                   0                   0

  Columns 21 through 25

                   0                   0                   0                   0                   0

  Columns 26 through 30

                   0                   0                   0                   0                   0

  Columns 31 through 35

                   0                   0                   0                   0                   0

  Columns 36 through 40

                   0                   0                   0                   0                   0

  Columns 41 through 45

                   0                   0                   0                   0                   0

  Columns 46 through 50

                   0                   0                   0                   0                   0

  Columns 51 through 55

                   0                   0                   0                   0                   0

  Columns 56 through 60

                   0                   0                   0                   0                   0

  Column 61

                   0


inner_code_BER =

  Columns 1 through 5

   0.442059265299197   0.438495140517212   0.434577689968610   0.430249752007699   0.425440710275914

  Columns 6 through 10

   0.420062485950892   0.414004155827468   0.407124705156026   0.399243281233111   0.390126191111209

  Columns 11 through 15

   0.379469900484071   0.366879750449458   0.351845805786628   0.333722159625866                   0

  Columns 16 through 20

                   0                   0                   0                   0                   0

  Columns 21 through 25

                   0                   0                   0                   0                   0

  Columns 26 through 30

                   0                   0                   0                   0                   0

  Columns 31 through 35

                   0                   0                   0                   0                   0

  Columns 36 through 40

                   0                   0                   0                   0                   0

  Columns 41 through 45

                   0                   0                   0                   0                   0

  Columns 46 through 50

                   0                   0                   0                   0                   0

  Columns 51 through 55

                   0                   0                   0                   0                   0

  Columns 56 through 60

                   0                   0                   0                   0                   0

  Column 61

                   0


outer_code_BER =

  Columns 1 through 5

   0.442059265299198   0.438495140517214   0.434577689968611   0.430249752007699   0.425440710275914

  Columns 6 through 10

   0.420062485950892   0.414004155827468   0.407124705156027   0.399243281233112   0.390126191111211

  Columns 11 through 15

   0.379469900484071   0.366879750449459   0.351845805786628   0.333722159625865                   0

  Columns 16 through 20

                   0                   0                   0                   0                   0

  Columns 21 through 25

                   0                   0                   0                   0                   0

  Columns 26 through 30

                   0                   0                   0                   0                   0

  Columns 31 through 35

                   0                   0                   0                   0                   0

  Columns 36 through 40

                   0                   0                   0                   0                   0

  Columns 41 through 45

                   0                   0                   0                   0                   0

  Columns 46 through 50

                   0                   0                   0                   0                   0

  Columns 51 through 55

                   0                   0                   0                   0                   0

  Columns 56 through 60

                   0                   0                   0                   0                   0

  Column 61

                   0


inner_code_BER =

  Columns 1 through 5

   0.442059265299197   0.438495140517212   0.434577689968610   0.430249752007699   0.425440710275914

  Columns 6 through 10

   0.420062485950892   0.414004155827468   0.407124705156026   0.399243281233111   0.390126191111209

  Columns 11 through 15

   0.379469900484071   0.366879750449458   0.351845805786628   0.333722159625866   0.311728699399704

  Columns 16 through 20

                   0                   0                   0                   0                   0

  Columns 21 through 25

                   0                   0                   0                   0                   0

  Columns 26 through 30

                   0                   0                   0                   0                   0

  Columns 31 through 35

                   0                   0                   0                   0                   0

  Columns 36 through 40

                   0                   0                   0                   0                   0

  Columns 41 through 45

                   0                   0                   0                   0                   0

  Columns 46 through 50

                   0                   0                   0                   0                   0

  Columns 51 through 55

                   0                   0                   0                   0                   0

  Columns 56 through 60

                   0                   0                   0                   0                   0

  Column 61

                   0


outer_code_BER =

  Columns 1 through 5

   0.442059265299198   0.438495140517214   0.434577689968611   0.430249752007699   0.425440710275914

  Columns 6 through 10

   0.420062485950892   0.414004155827468   0.407124705156027   0.399243281233112   0.390126191111211

  Columns 11 through 15

   0.379469900484071   0.366879750449459   0.351845805786628   0.333722159625865   0.311728699399703

  Columns 16 through 20

                   0                   0                   0                   0                   0

  Columns 21 through 25

                   0                   0                   0                   0                   0

  Columns 26 through 30

                   0                   0                   0                   0                   0

  Columns 31 through 35

                   0                   0                   0                   0                   0

  Columns 36 through 40

                   0                   0                   0                   0                   0

  Columns 41 through 45

                   0                   0                   0                   0                   0

  Columns 46 through 50

                   0                   0                   0                   0                   0

  Columns 51 through 55

                   0                   0                   0                   0                   0

  Columns 56 through 60

                   0                   0                   0                   0                   0

  Column 61

                   0


inner_code_BER =

  Columns 1 through 5

   0.442059265299197   0.438495140517212   0.434577689968610   0.430249752007699   0.425440710275914

  Columns 6 through 10

   0.420062485950892   0.414004155827468   0.407124705156026   0.399243281233111   0.390126191111209

  Columns 11 through 15

   0.379469900484071   0.366879750449458   0.351845805786628   0.333722159625866   0.311728699399704

  Columns 16 through 20

   0.285021607039339                   0                   0                   0                   0

  Columns 21 through 25

                   0                   0                   0                   0                   0

  Columns 26 through 30

                   0                   0                   0                   0                   0

  Columns 31 through 35

                   0                   0                   0                   0                   0

  Columns 36 through 40

                   0                   0                   0                   0                   0

  Columns 41 through 45

                   0                   0                   0                   0                   0

  Columns 46 through 50

                   0                   0                   0                   0                   0

  Columns 51 through 55

                   0                   0                   0                   0                   0

  Columns 56 through 60

                   0                   0                   0                   0                   0

  Column 61

                   0


outer_code_BER =

  Columns 1 through 5

   0.442059265299198   0.438495140517214   0.434577689968611   0.430249752007699   0.425440710275914

  Columns 6 through 10

   0.420062485950892   0.414004155827468   0.407124705156027   0.399243281233112   0.390126191111211

  Columns 11 through 15

   0.379469900484071   0.366879750449459   0.351845805786628   0.333722159625865   0.311728699399703

  Columns 16 through 20

   0.285021607039338                   0                   0                   0                   0

  Columns 21 through 25

                   0                   0                   0                   0                   0

  Columns 26 through 30

                   0                   0                   0                   0                   0

  Columns 31 through 35

                   0                   0                   0                   0                   0

  Columns 36 through 40

                   0                   0                   0                   0                   0

  Columns 41 through 45

                   0                   0                   0                   0                   0

  Columns 46 through 50

                   0                   0                   0                   0                   0

  Columns 51 through 55

                   0                   0                   0                   0                   0

  Columns 56 through 60

                   0                   0                   0                   0                   0

  Column 61

                   0


inner_code_BER =

  Columns 1 through 5

   0.442059265299197   0.438495140517212   0.434577689968610   0.430249752007699   0.425440710275914

  Columns 6 through 10

   0.420062485950892   0.414004155827468   0.407124705156026   0.399243281233111   0.390126191111209

  Columns 11 through 15

   0.379469900484071   0.366879750449458   0.351845805786628   0.333722159625866   0.311728699399704

  Columns 16 through 20

   0.285021607039339   0.252907304976643                   0                   0                   0

  Columns 21 through 25

                   0                   0                   0                   0                   0

  Columns 26 through 30

                   0                   0                   0                   0                   0

  Columns 31 through 35

                   0                   0                   0                   0                   0

  Columns 36 through 40

                   0                   0                   0                   0                   0

  Columns 41 through 45

                   0                   0                   0                   0                   0

  Columns 46 through 50

                   0                   0                   0                   0                   0

  Columns 51 through 55

                   0                   0                   0                   0                   0

  Columns 56 through 60

                   0                   0                   0                   0                   0

  Column 61

                   0


outer_code_BER =

  Columns 1 through 5

   0.442059265299198   0.438495140517214   0.434577689968611   0.430249752007699   0.425440710275914

  Columns 6 through 10

   0.420062485950892   0.414004155827468   0.407124705156027   0.399243281233112   0.390126191111211

  Columns 11 through 15

   0.379469900484071   0.366879750449459   0.351845805786628   0.333722159625865   0.311728699399703

  Columns 16 through 20

   0.285021607039338   0.252907304976643                   0                   0                   0

  Columns 21 through 25

                   0                   0                   0                   0                   0

  Columns 26 through 30

                   0                   0                   0                   0                   0

  Columns 31 through 35

                   0                   0                   0                   0                   0

  Columns 36 through 40

                   0                   0                   0                   0                   0

  Columns 41 through 45

                   0                   0                   0                   0                   0

  Columns 46 through 50

                   0                   0                   0                   0                   0

  Columns 51 through 55

                   0                   0                   0                   0                   0

  Columns 56 through 60

                   0                   0                   0                   0                   0

  Column 61

                   0


inner_code_BER =

  Columns 1 through 5

   0.442059265299197   0.438495140517212   0.434577689968610   0.430249752007699   0.425440710275914

  Columns 6 through 10

   0.420062485950892   0.414004155827468   0.407124705156026   0.399243281233111   0.390126191111209

  Columns 11 through 15

   0.379469900484071   0.366879750449458   0.351845805786628   0.333722159625866   0.311728699399704

  Columns 16 through 20

   0.285021607039339   0.252907304976643   0.215181564501605                   0                   0

  Columns 21 through 25

                   0                   0                   0                   0                   0

  Columns 26 through 30

                   0                   0                   0                   0                   0

  Columns 31 through 35

                   0                   0                   0                   0                   0

  Columns 36 through 40

                   0                   0                   0                   0                   0

  Columns 41 through 45

                   0                   0                   0                   0                   0

  Columns 46 through 50

                   0                   0                   0                   0                   0

  Columns 51 through 55

                   0                   0                   0                   0                   0

  Columns 56 through 60

                   0                   0                   0                   0                   0

  Column 61

                   0


outer_code_BER =

  Columns 1 through 5

   0.442059265299198   0.438495140517214   0.434577689968611   0.430249752007699   0.425440710275914

  Columns 6 through 10

   0.420062485950892   0.414004155827468   0.407124705156027   0.399243281233112   0.390126191111211

  Columns 11 through 15

   0.379469900484071   0.366879750449459   0.351845805786628   0.333722159625865   0.311728699399703

  Columns 16 through 20

   0.285021607039338   0.252907304976643   0.215181564501606                   0                   0

  Columns 21 through 25

                   0                   0                   0                   0                   0

  Columns 26 through 30

                   0                   0                   0                   0                   0

  Columns 31 through 35

                   0                   0                   0                   0                   0

  Columns 36 through 40

                   0                   0                   0                   0                   0

  Columns 41 through 45

                   0                   0                   0                   0                   0

  Columns 46 through 50

                   0                   0                   0                   0                   0

  Columns 51 through 55

                   0                   0                   0                   0                   0

  Columns 56 through 60

                   0                   0                   0                   0                   0

  Column 61

                   0


inner_code_BER =

  Columns 1 through 5

   0.442059265299197   0.438495140517212   0.434577689968610   0.430249752007699   0.425440710275914

  Columns 6 through 10

   0.420062485950892   0.414004155827468   0.407124705156026   0.399243281233111   0.390126191111209

  Columns 11 through 15

   0.379469900484071   0.366879750449458   0.351845805786628   0.333722159625866   0.311728699399704

  Columns 16 through 20

   0.285021607039339   0.252907304976643   0.215181564501605   0.172271173268218                   0

  Columns 21 through 25

                   0                   0                   0                   0                   0

  Columns 26 through 30

                   0                   0                   0                   0                   0

  Columns 31 through 35

                   0                   0                   0                   0                   0

  Columns 36 through 40

                   0                   0                   0                   0                   0

  Columns 41 through 45

                   0                   0                   0                   0                   0

  Columns 46 through 50

                   0                   0                   0                   0                   0

  Columns 51 through 55

                   0                   0                   0                   0                   0

  Columns 56 through 60

                   0                   0                   0                   0                   0

  Column 61

                   0


outer_code_BER =

  Columns 1 through 5

   0.442059265299198   0.438495140517214   0.434577689968611   0.430249752007699   0.425440710275914

  Columns 6 through 10

   0.420062485950892   0.414004155827468   0.407124705156027   0.399243281233112   0.390126191111211

  Columns 11 through 15

   0.379469900484071   0.366879750449459   0.351845805786628   0.333722159625865   0.311728699399703

  Columns 16 through 20

   0.285021607039338   0.252907304976643   0.215181564501606   0.172271173268218                   0

  Columns 21 through 25

                   0                   0                   0                   0                   0

  Columns 26 through 30

                   0                   0                   0                   0                   0

  Columns 31 through 35

                   0                   0                   0                   0                   0

  Columns 36 through 40

                   0                   0                   0                   0                   0

  Columns 41 through 45

                   0                   0                   0                   0                   0

  Columns 46 through 50

                   0                   0                   0                   0                   0

  Columns 51 through 55

                   0                   0                   0                   0                   0

  Columns 56 through 60

                   0                   0                   0                   0                   0

  Column 61

                   0


inner_code_BER =

  Columns 1 through 5

   0.442059265299197   0.438495140517212   0.434577689968610   0.430249752007699   0.425440710275914

  Columns 6 through 10

   0.420062485950892   0.414004155827468   0.407124705156026   0.399243281233111   0.390126191111209

  Columns 11 through 15

   0.379469900484071   0.366879750449458   0.351845805786628   0.333722159625866   0.311728699399704

  Columns 16 through 20

   0.285021607039339   0.252907304976643   0.215181564501605   0.172271173268218   0.125744433505888

  Columns 21 through 25

                   0                   0                   0                   0                   0

  Columns 26 through 30

                   0                   0                   0                   0                   0

  Columns 31 through 35

                   0                   0                   0                   0                   0

  Columns 36 through 40

                   0                   0                   0                   0                   0

  Columns 41 through 45

                   0                   0                   0                   0                   0

  Columns 46 through 50

                   0                   0                   0                   0                   0

  Columns 51 through 55

                   0                   0                   0                   0                   0

  Columns 56 through 60

                   0                   0                   0                   0                   0

  Column 61

                   0


outer_code_BER =

  Columns 1 through 5

   0.442059265299198   0.438495140517214   0.434577689968611   0.430249752007699   0.425440710275914

  Columns 6 through 10

   0.420062485950892   0.414004155827468   0.407124705156027   0.399243281233112   0.390126191111211

  Columns 11 through 15

   0.379469900484071   0.366879750449459   0.351845805786628   0.333722159625865   0.311728699399703

  Columns 16 through 20

   0.285021607039338   0.252907304976643   0.215181564501606   0.172271173268218   0.125744433505889

  Columns 21 through 25

                   0                   0                   0                   0                   0

  Columns 26 through 30

                   0                   0                   0                   0                   0

  Columns 31 through 35

                   0                   0                   0                   0                   0

  Columns 36 through 40

                   0                   0                   0                   0                   0

  Columns 41 through 45

                   0                   0                   0                   0                   0

  Columns 46 through 50

                   0                   0                   0                   0                   0

  Columns 51 through 55

                   0                   0                   0                   0                   0

  Columns 56 through 60

                   0                   0                   0                   0                   0

  Column 61

                   0


inner_code_BER =

  Columns 1 through 5

   0.442059265299197   0.438495140517212   0.434577689968610   0.430249752007699   0.425440710275914

  Columns 6 through 10

   0.420062485950892   0.414004155827468   0.407124705156026   0.399243281233111   0.390126191111209

  Columns 11 through 15

   0.379469900484071   0.366879750449458   0.351845805786628   0.333722159625866   0.311728699399704

  Columns 16 through 20

   0.285021607039339   0.252907304976643   0.215181564501605   0.172271173268218   0.125744433505888

  Columns 21 through 25

   0.080379797876579                   0                   0                   0                   0

  Columns 26 through 30

                   0                   0                   0                   0                   0

  Columns 31 through 35

                   0                   0                   0                   0                   0

  Columns 36 through 40

                   0                   0                   0                   0                   0

  Columns 41 through 45

                   0                   0                   0                   0                   0

  Columns 46 through 50

                   0                   0                   0                   0                   0

  Columns 51 through 55

                   0                   0                   0                   0                   0

  Columns 56 through 60

                   0                   0                   0                   0                   0

  Column 61

                   0


outer_code_BER =

  Columns 1 through 5

   0.442059265299198   0.438495140517214   0.434577689968611   0.430249752007699   0.425440710275914

  Columns 6 through 10

   0.420062485950892   0.414004155827468   0.407124705156027   0.399243281233112   0.390126191111211

  Columns 11 through 15

   0.379469900484071   0.366879750449459   0.351845805786628   0.333722159625865   0.311728699399703

  Columns 16 through 20

   0.285021607039338   0.252907304976643   0.215181564501606   0.172271173268218   0.125744433505889

  Columns 21 through 25

   0.080379797876579                   0                   0                   0                   0

  Columns 26 through 30

                   0                   0                   0                   0                   0

  Columns 31 through 35

                   0                   0                   0                   0                   0

  Columns 36 through 40

                   0                   0                   0                   0                   0

  Columns 41 through 45

                   0                   0                   0                   0                   0

  Columns 46 through 50

                   0                   0                   0                   0                   0

  Columns 51 through 55

                   0                   0                   0                   0                   0

  Columns 56 through 60

                   0                   0                   0                   0                   0

  Column 61

                   0


inner_code_BER =

  Columns 1 through 5

   0.442059265299197   0.438495140517212   0.434577689968610   0.430249752007699   0.425440710275914

  Columns 6 through 10

   0.420062485950892   0.414004155827468   0.407124705156026   0.399243281233111   0.390126191111209

  Columns 11 through 15

   0.379469900484071   0.366879750449458   0.351845805786628   0.333722159625866   0.311728699399704

  Columns 16 through 20

   0.285021607039339   0.252907304976643   0.215181564501605   0.172271173268218   0.125744433505888

  Columns 21 through 25

   0.080379797876579   0.036451127968054                   0                   0                   0

  Columns 26 through 30

                   0                   0                   0                   0                   0

  Columns 31 through 35

                   0                   0                   0                   0                   0

  Columns 36 through 40

                   0                   0                   0                   0                   0

  Columns 41 through 45

                   0                   0                   0                   0                   0

  Columns 46 through 50

                   0                   0                   0                   0                   0

  Columns 51 through 55

                   0                   0                   0                   0                   0

  Columns 56 through 60

                   0                   0                   0                   0                   0

  Column 61

                   0


outer_code_BER =

  Columns 1 through 5

   0.442059265299198   0.438495140517214   0.434577689968611   0.430249752007699   0.425440710275914

  Columns 6 through 10

   0.420062485950892   0.414004155827468   0.407124705156027   0.399243281233112   0.390126191111211

  Columns 11 through 15

   0.379469900484071   0.366879750449459   0.351845805786628   0.333722159625865   0.311728699399703

  Columns 16 through 20

   0.285021607039338   0.252907304976643   0.215181564501606   0.172271173268218   0.125744433505889

  Columns 21 through 25

   0.080379797876579   0.036451132867660                   0                   0                   0

  Columns 26 through 30

                   0                   0                   0                   0                   0

  Columns 31 through 35

                   0                   0                   0                   0                   0

  Columns 36 through 40

                   0                   0                   0                   0                   0

  Columns 41 through 45

                   0                   0                   0                   0                   0

  Columns 46 through 50

                   0                   0                   0                   0                   0

  Columns 51 through 55

                   0                   0                   0                   0                   0

  Columns 56 through 60

                   0                   0                   0                   0                   0

  Column 61

                   0


inner_code_BER =

  Columns 1 through 5

   0.442059265299197   0.438495140517212   0.434577689968610   0.430249752007699   0.425440710275914

  Columns 6 through 10

   0.420062485950892   0.414004155827468   0.407124705156026   0.399243281233111   0.390126191111209

  Columns 11 through 15

   0.379469900484071   0.366879750449458   0.351845805786628   0.333722159625866   0.311728699399704

  Columns 16 through 20

   0.285021607039339   0.252907304976643   0.215181564501605   0.172271173268218   0.125744433505888

  Columns 21 through 25

   0.080379797876579   0.036451127968054   0.002373858159555                   0                   0

  Columns 26 through 30

                   0                   0                   0                   0                   0

  Columns 31 through 35

                   0                   0                   0                   0                   0

  Columns 36 through 40

                   0                   0                   0                   0                   0

  Columns 41 through 45

                   0                   0                   0                   0                   0

  Columns 46 through 50

                   0                   0                   0                   0                   0

  Columns 51 through 55

                   0                   0                   0                   0                   0

  Columns 56 through 60

                   0                   0                   0                   0                   0

  Column 61

                   0


outer_code_BER =

  Columns 1 through 5

   0.442059265299198   0.438495140517214   0.434577689968611   0.430249752007699   0.425440710275914

  Columns 6 through 10

   0.420062485950892   0.414004155827468   0.407124705156027   0.399243281233112   0.390126191111211

  Columns 11 through 15

   0.379469900484071   0.366879750449459   0.351845805786628   0.333722159625865   0.311728699399703

  Columns 16 through 20

   0.285021607039338   0.252907304976643   0.215181564501606   0.172271173268218   0.125744433505889

  Columns 21 through 25

   0.080379797876579   0.036451132867660   0.000000074403558                   0                   0

  Columns 26 through 30

                   0                   0                   0                   0                   0

  Columns 31 through 35

                   0                   0                   0                   0                   0

  Columns 36 through 40

                   0                   0                   0                   0                   0

  Columns 41 through 45

                   0                   0                   0                   0                   0

  Columns 46 through 50

                   0                   0                   0                   0                   0

  Columns 51 through 55

                   0                   0                   0                   0                   0

  Columns 56 through 60

                   0                   0                   0                   0                   0

  Column 61

                   0

µ±Ç°ÍâÂëÎóÂëÂÊÒÑµÍÓÚÄ¿±êÎóÂëÂÊ£¬ÐÅÔë±ÈÎª2.20 dB

inner_code_BER =

  Columns 1 through 5

   0.442059265299197   0.438495140517212   0.434577689968610   0.430249752007699   0.425440710275914

  Columns 6 through 10

   0.420062485950892   0.414004155827468   0.407124705156026   0.399243281233111   0.390126191111209

  Columns 11 through 15

   0.379469900484071   0.366879750449458   0.351845805786628   0.333722159625866   0.311728699399704

  Columns 16 through 20

   0.285021607039339   0.252907304976643   0.215181564501605   0.172271173268218   0.125744433505888

  Columns 21 through 25

   0.080379797876579   0.036451127968054   0.002373858159555   0.001943444825933                   0

  Columns 26 through 30

                   0                   0                   0                   0                   0

  Columns 31 through 35

                   0                   0                   0                   0                   0

  Columns 36 through 40

                   0                   0                   0                   0                   0

  Columns 41 through 45

                   0                   0                   0                   0                   0

  Columns 46 through 50

                   0                   0                   0                   0                   0

  Columns 51 through 55

                   0                   0                   0                   0                   0

  Columns 56 through 60

                   0                   0                   0                   0                   0

  Column 61

                   0


inner_code_BER =

  Columns 1 through 5

   0.442059265299197   0.438495140517212   0.434577689968610   0.430249752007699   0.425440710275914

  Columns 6 through 10

   0.420062485950892   0.414004155827468   0.407124705156026   0.399243281233111   0.390126191111209

  Columns 11 through 15

   0.379469900484071   0.366879750449458   0.351845805786628   0.333722159625866   0.311728699399704

  Columns 16 through 20

   0.285021607039339   0.252907304976643   0.215181564501605   0.172271173268218   0.125744433505888

  Columns 21 through 25

   0.080379797876579   0.036451127968054   0.002373858159555   0.001943444825933   0.001648425379811

  Columns 26 through 30

                   0                   0                   0                   0                   0

  Columns 31 through 35

                   0                   0                   0                   0                   0

  Columns 36 through 40

                   0                   0                   0                   0                   0

  Columns 41 through 45

                   0                   0                   0                   0                   0

  Columns 46 through 50

                   0                   0                   0                   0                   0

  Columns 51 through 55

                   0                   0                   0                   0                   0

  Columns 56 through 60

                   0                   0                   0                   0                   0

  Column 61

                   0


inner_code_BER =

  Columns 1 through 5

   0.442059265299197   0.438495140517212   0.434577689968610   0.430249752007699   0.425440710275914

  Columns 6 through 10

   0.420062485950892   0.414004155827468   0.407124705156026   0.399243281233111   0.390126191111209

  Columns 11 through 15

   0.379469900484071   0.366879750449458   0.351845805786628   0.333722159625866   0.311728699399704

  Columns 16 through 20

   0.285021607039339   0.252907304976643   0.215181564501605   0.172271173268218   0.125744433505888

  Columns 21 through 25

   0.080379797876579   0.036451127968054   0.002373858159555   0.001943444825933   0.001648425379811

  Columns 26 through 30

   0.001426772815337                   0                   0                   0                   0

  Columns 31 through 35

                   0                   0                   0                   0                   0

  Columns 36 through 40

                   0                   0                   0                   0                   0

  Columns 41 through 45

                   0                   0                   0                   0                   0

  Columns 46 through 50

                   0                   0                   0                   0                   0

  Columns 51 through 55

                   0                   0                   0                   0                   0

  Columns 56 through 60

                   0                   0                   0                   0                   0

  Column 61

                   0


inner_code_BER =

  Columns 1 through 5

   0.442059265299197   0.438495140517212   0.434577689968610   0.430249752007699   0.425440710275914

  Columns 6 through 10

   0.420062485950892   0.414004155827468   0.407124705156026   0.399243281233111   0.390126191111209

  Columns 11 through 15

   0.379469900484071   0.366879750449458   0.351845805786628   0.333722159625866   0.311728699399704

  Columns 16 through 20

   0.285021607039339   0.252907304976643   0.215181564501605   0.172271173268218   0.125744433505888

  Columns 21 through 25

   0.080379797876579   0.036451127968054   0.002373858159555   0.001943444825933   0.001648425379811

  Columns 26 through 30

   0.001426772815337   0.001251739283591                   0                   0                   0

  Columns 31 through 35

                   0                   0                   0                   0                   0

  Columns 36 through 40

                   0                   0                   0                   0                   0

  Columns 41 through 45

                   0                   0                   0                   0                   0

  Columns 46 through 50

                   0                   0                   0                   0                   0

  Columns 51 through 55

                   0                   0                   0                   0                   0

  Columns 56 through 60

                   0                   0                   0                   0                   0

  Column 61

                   0


inner_code_BER =

  Columns 1 through 5

   0.442059265299197   0.438495140517212   0.434577689968610   0.430249752007699   0.425440710275914

  Columns 6 through 10

   0.420062485950892   0.414004155827468   0.407124705156026   0.399243281233111   0.390126191111209

  Columns 11 through 15

   0.379469900484071   0.366879750449458   0.351845805786628   0.333722159625866   0.311728699399704

  Columns 16 through 20

   0.285021607039339   0.252907304976643   0.215181564501605   0.172271173268218   0.125744433505888

  Columns 21 through 25

   0.080379797876579   0.036451127968054   0.002373858159555   0.001943444825933   0.001648425379811

  Columns 26 through 30

   0.001426772815337   0.001251739283591   0.001108999211342                   0                   0

  Columns 31 through 35

                   0                   0                   0                   0                   0

  Columns 36 through 40

                   0                   0                   0                   0                   0

  Columns 41 through 45

                   0                   0                   0                   0                   0

  Columns 46 through 50

                   0                   0                   0                   0                   0

  Columns 51 through 55

                   0                   0                   0                   0                   0

  Columns 56 through 60

                   0                   0                   0                   0                   0

  Column 61

                   0


inner_code_BER =

  Columns 1 through 5

   0.442059265299197   0.438495140517212   0.434577689968610   0.430249752007699   0.425440710275914

  Columns 6 through 10

   0.420062485950892   0.414004155827468   0.407124705156026   0.399243281233111   0.390126191111209

  Columns 11 through 15

   0.379469900484071   0.366879750449458   0.351845805786628   0.333722159625866   0.311728699399704

  Columns 16 through 20

   0.285021607039339   0.252907304976643   0.215181564501605   0.172271173268218   0.125744433505888

  Columns 21 through 25

   0.080379797876579   0.036451127968054   0.002373858159555   0.001943444825933   0.001648425379811

  Columns 26 through 30

   0.001426772815337   0.001251739283591   0.001108999211342   0.000989933729641                   0

  Columns 31 through 35

                   0                   0                   0                   0                   0

  Columns 36 through 40

                   0                   0                   0                   0                   0

  Columns 41 through 45

                   0                   0                   0                   0                   0

  Columns 46 through 50

                   0                   0                   0                   0                   0

  Columns 51 through 55

                   0                   0                   0                   0                   0

  Columns 56 through 60

                   0                   0                   0                   0                   0

  Column 61

                   0


inner_code_BER =

  Columns 1 through 5

   0.442059265299197   0.438495140517212   0.434577689968610   0.430249752007699   0.425440710275914

  Columns 6 through 10

   0.420062485950892   0.414004155827468   0.407124705156026   0.399243281233111   0.390126191111209

  Columns 11 through 15

   0.379469900484071   0.366879750449458   0.351845805786628   0.333722159625866   0.311728699399704

  Columns 16 through 20

   0.285021607039339   0.252907304976643   0.215181564501605   0.172271173268218   0.125744433505888

  Columns 21 through 25

   0.080379797876579   0.036451127968054   0.002373858159555   0.001943444825933   0.001648425379811

  Columns 26 through 30

   0.001426772815337   0.001251739283591   0.001108999211342   0.000989933729641   0.000888935838715

  Columns 31 through 35

                   0                   0                   0                   0                   0

  Columns 36 through 40

                   0                   0                   0                   0                   0

  Columns 41 through 45

                   0                   0                   0                   0                   0

  Columns 46 through 50

                   0                   0                   0                   0                   0

  Columns 51 through 55

                   0                   0                   0                   0                   0

  Columns 56 through 60

                   0                   0                   0                   0                   0

  Column 61

                   0


inner_code_BER =

  Columns 1 through 5

   0.442059265299197   0.438495140517212   0.434577689968610   0.430249752007699   0.425440710275914

  Columns 6 through 10

   0.420062485950892   0.414004155827468   0.407124705156026   0.399243281233111   0.390126191111209

  Columns 11 through 15

   0.379469900484071   0.366879750449458   0.351845805786628   0.333722159625866   0.311728699399704

  Columns 16 through 20

   0.285021607039339   0.252907304976643   0.215181564501605   0.172271173268218   0.125744433505888

  Columns 21 through 25

   0.080379797876579   0.036451127968054   0.002373858159555   0.001943444825933   0.001648425379811

  Columns 26 through 30

   0.001426772815337   0.001251739283591   0.001108999211342   0.000989933729641   0.000888935838715

  Columns 31 through 35

   0.000802146191349                   0                   0                   0                   0

  Columns 36 through 40

                   0                   0                   0                   0                   0

  Columns 41 through 45

                   0                   0                   0                   0                   0

  Columns 46 through 50

                   0                   0                   0                   0                   0

  Columns 51 through 55

                   0                   0                   0                   0                   0

  Columns 56 through 60

                   0                   0                   0                   0                   0

  Column 61

                   0


inner_code_BER =

  Columns 1 through 5

   0.442059265299197   0.438495140517212   0.434577689968610   0.430249752007699   0.425440710275914

  Columns 6 through 10

   0.420062485950892   0.414004155827468   0.407124705156026   0.399243281233111   0.390126191111209

  Columns 11 through 15

   0.379469900484071   0.366879750449458   0.351845805786628   0.333722159625866   0.311728699399704

  Columns 16 through 20

   0.285021607039339   0.252907304976643   0.215181564501605   0.172271173268218   0.125744433505888

  Columns 21 through 25

   0.080379797876579   0.036451127968054   0.002373858159555   0.001943444825933   0.001648425379811

  Columns 26 through 30

   0.001426772815337   0.001251739283591   0.001108999211342   0.000989933729641   0.000888935838715

  Columns 31 through 35

   0.000802146191349   0.000726792344742                   0                   0                   0

  Columns 36 through 40

                   0                   0                   0                   0                   0

  Columns 41 through 45

                   0                   0                   0                   0                   0

  Columns 46 through 50

                   0                   0                   0                   0                   0

  Columns 51 through 55

                   0                   0                   0                   0                   0

  Columns 56 through 60

                   0                   0                   0                   0                   0

  Column 61

                   0


inner_code_BER =

  Columns 1 through 5

   0.442059265299197   0.438495140517212   0.434577689968610   0.430249752007699   0.425440710275914

  Columns 6 through 10

   0.420062485950892   0.414004155827468   0.407124705156026   0.399243281233111   0.390126191111209

  Columns 11 through 15

   0.379469900484071   0.366879750449458   0.351845805786628   0.333722159625866   0.311728699399704

  Columns 16 through 20

   0.285021607039339   0.252907304976643   0.215181564501605   0.172271173268218   0.125744433505888

  Columns 21 through 25

   0.080379797876579   0.036451127968054   0.002373858159555   0.001943444825933   0.001648425379811

  Columns 26 through 30

   0.001426772815337   0.001251739283591   0.001108999211342   0.000989933729641   0.000888935838715

  Columns 31 through 35

   0.000802146191349   0.000726792344742   0.000660814715802                   0                   0

  Columns 36 through 40

                   0                   0                   0                   0                   0

  Columns 41 through 45

                   0                   0                   0                   0                   0

  Columns 46 through 50

                   0                   0                   0                   0                   0

  Columns 51 through 55

                   0                   0                   0                   0                   0

  Columns 56 through 60

                   0                   0                   0                   0                   0

  Column 61

                   0


inner_code_BER =

  Columns 1 through 5

   0.442059265299197   0.438495140517212   0.434577689968610   0.430249752007699   0.425440710275914

  Columns 6 through 10

   0.420062485950892   0.414004155827468   0.407124705156026   0.399243281233111   0.390126191111209

  Columns 11 through 15

   0.379469900484071   0.366879750449458   0.351845805786628   0.333722159625866   0.311728699399704

  Columns 16 through 20

   0.285021607039339   0.252907304976643   0.215181564501605   0.172271173268218   0.125744433505888

  Columns 21 through 25

   0.080379797876579   0.036451127968054   0.002373858159555   0.001943444825933   0.001648425379811

  Columns 26 through 30

   0.001426772815337   0.001251739283591   0.001108999211342   0.000989933729641   0.000888935838715

  Columns 31 through 35

   0.000802146191349   0.000726792344742   0.000660814715802   0.000602641366482                   0

  Columns 36 through 40

                   0                   0                   0                   0                   0

  Columns 41 through 45

                   0                   0                   0                   0                   0

  Columns 46 through 50

                   0                   0                   0                   0                   0

  Columns 51 through 55

                   0                   0                   0                   0                   0

  Columns 56 through 60

                   0                   0                   0                   0                   0

  Column 61

                   0


inner_code_BER =

  Columns 1 through 5

   0.442059265299197   0.438495140517212   0.434577689968610   0.430249752007699   0.425440710275914

  Columns 6 through 10

   0.420062485950892   0.414004155827468   0.407124705156026   0.399243281233111   0.390126191111209

  Columns 11 through 15

   0.379469900484071   0.366879750449458   0.351845805786628   0.333722159625866   0.311728699399704

  Columns 16 through 20

   0.285021607039339   0.252907304976643   0.215181564501605   0.172271173268218   0.125744433505888

  Columns 21 through 25

   0.080379797876579   0.036451127968054   0.002373858159555   0.001943444825933   0.001648425379811

  Columns 26 through 30

   0.001426772815337   0.001251739283591   0.001108999211342   0.000989933729641   0.000888935838715

  Columns 31 through 35

   0.000802146191349   0.000726792344742   0.000660814715802   0.000602641366482   0.000551045560236

  Columns 36 through 40

                   0                   0                   0                   0                   0

  Columns 41 through 45

                   0                   0                   0                   0                   0

  Columns 46 through 50

                   0                   0                   0                   0                   0

  Columns 51 through 55

                   0                   0                   0                   0                   0

  Columns 56 through 60

                   0                   0                   0                   0                   0

  Column 61

                   0


inner_code_BER =

  Columns 1 through 5

   0.442059265299197   0.438495140517212   0.434577689968610   0.430249752007699   0.425440710275914

  Columns 6 through 10

   0.420062485950892   0.414004155827468   0.407124705156026   0.399243281233111   0.390126191111209

  Columns 11 through 15

   0.379469900484071   0.366879750449458   0.351845805786628   0.333722159625866   0.311728699399704

  Columns 16 through 20

   0.285021607039339   0.252907304976643   0.215181564501605   0.172271173268218   0.125744433505888

  Columns 21 through 25

   0.080379797876579   0.036451127968054   0.002373858159555   0.001943444825933   0.001648425379811

  Columns 26 through 30

   0.001426772815337   0.001251739283591   0.001108999211342   0.000989933729641   0.000888935838715

  Columns 31 through 35

   0.000802146191349   0.000726792344742   0.000660814715802   0.000602641366482   0.000551045560236

  Columns 36 through 40

   0.000505051968965                   0                   0                   0                   0

  Columns 41 through 45

                   0                   0                   0                   0                   0

  Columns 46 through 50

                   0                   0                   0                   0                   0

  Columns 51 through 55

                   0                   0                   0                   0                   0

  Columns 56 through 60

                   0                   0                   0                   0                   0

  Column 61

                   0


inner_code_BER =

  Columns 1 through 5

   0.442059265299197   0.438495140517212   0.434577689968610   0.430249752007699   0.425440710275914

  Columns 6 through 10

   0.420062485950892   0.414004155827468   0.407124705156026   0.399243281233111   0.390126191111209

  Columns 11 through 15

   0.379469900484071   0.366879750449458   0.351845805786628   0.333722159625866   0.311728699399704

  Columns 16 through 20

   0.285021607039339   0.252907304976643   0.215181564501605   0.172271173268218   0.125744433505888

  Columns 21 through 25

   0.080379797876579   0.036451127968054   0.002373858159555   0.001943444825933   0.001648425379811

  Columns 26 through 30

   0.001426772815337   0.001251739283591   0.001108999211342   0.000989933729641   0.000888935838715

  Columns 31 through 35

   0.000802146191349   0.000726792344742   0.000660814715802   0.000602641366482   0.000551045560236

  Columns 36 through 40

   0.000505051968965   0.000463872805331                   0                   0                   0

  Columns 41 through 45

                   0                   0                   0                   0                   0

  Columns 46 through 50

                   0                   0                   0                   0                   0

  Columns 51 through 55

                   0                   0                   0                   0                   0

  Columns 56 through 60

                   0                   0                   0                   0                   0

  Column 61

                   0


inner_code_BER =

  Columns 1 through 5

   0.442059265299197   0.438495140517212   0.434577689968610   0.430249752007699   0.425440710275914

  Columns 6 through 10

   0.420062485950892   0.414004155827468   0.407124705156026   0.399243281233111   0.390126191111209

  Columns 11 through 15

   0.379469900484071   0.366879750449458   0.351845805786628   0.333722159625866   0.311728699399704

  Columns 16 through 20

   0.285021607039339   0.252907304976643   0.215181564501605   0.172271173268218   0.125744433505888

  Columns 21 through 25

   0.080379797876579   0.036451127968054   0.002373858159555   0.001943444825933   0.001648425379811

  Columns 26 through 30

   0.001426772815337   0.001251739283591   0.001108999211342   0.000989933729641   0.000888935838715

  Columns 31 through 35

   0.000802146191349   0.000726792344742   0.000660814715802   0.000602641366482   0.000551045560236

  Columns 36 through 40

   0.000505051968965   0.000463872805331   0.000426863076928                   0                   0

  Columns 41 through 45

                   0                   0                   0                   0                   0

  Columns 46 through 50

                   0                   0                   0                   0                   0

  Columns 51 through 55

                   0                   0                   0                   0                   0

  Columns 56 through 60

                   0                   0                   0                   0                   0

  Column 61

                   0


inner_code_BER =

  Columns 1 through 5

   0.442059265299197   0.438495140517212   0.434577689968610   0.430249752007699   0.425440710275914

  Columns 6 through 10

   0.420062485950892   0.414004155827468   0.407124705156026   0.399243281233111   0.390126191111209

  Columns 11 through 15

   0.379469900484071   0.366879750449458   0.351845805786628   0.333722159625866   0.311728699399704

  Columns 16 through 20

   0.285021607039339   0.252907304976643   0.215181564501605   0.172271173268218   0.125744433505888

  Columns 21 through 25

   0.080379797876579   0.036451127968054   0.002373858159555   0.001943444825933   0.001648425379811

  Columns 26 through 30

   0.001426772815337   0.001251739283591   0.001108999211342   0.000989933729641   0.000888935838715

  Columns 31 through 35

   0.000802146191349   0.000726792344742   0.000660814715802   0.000602641366482   0.000551045560236

  Columns 36 through 40

   0.000505051968965   0.000463872805331   0.000426863076928   0.000393488461396                   0

  Columns 41 through 45

                   0                   0                   0                   0                   0

  Columns 46 through 50

                   0                   0                   0                   0                   0

  Columns 51 through 55

                   0                   0                   0                   0                   0

  Columns 56 through 60

                   0                   0                   0                   0                   0

  Column 61

                   0


inner_code_BER =

  Columns 1 through 5

   0.442059265299197   0.438495140517212   0.434577689968610   0.430249752007699   0.425440710275914

  Columns 6 through 10

   0.420062485950892   0.414004155827468   0.407124705156026   0.399243281233111   0.390126191111209

  Columns 11 through 15

   0.379469900484071   0.366879750449458   0.351845805786628   0.333722159625866   0.311728699399704

  Columns 16 through 20

   0.285021607039339   0.252907304976643   0.215181564501605   0.172271173268218   0.125744433505888

  Columns 21 through 25

   0.080379797876579   0.036451127968054   0.002373858159555   0.001943444825933   0.001648425379811

  Columns 26 through 30

   0.001426772815337   0.001251739283591   0.001108999211342   0.000989933729641   0.000888935838715

  Columns 31 through 35

   0.000802146191349   0.000726792344742   0.000660814715802   0.000602641366482   0.000551045560236

  Columns 36 through 40

   0.000505051968965   0.000463872805331   0.000426863076928   0.000393488461396   0.000363301747511

  Columns 41 through 45

                   0                   0                   0                   0                   0

  Columns 46 through 50

                   0                   0                   0                   0                   0

  Columns 51 through 55

                   0                   0                   0                   0                   0

  Columns 56 through 60

                   0                   0                   0                   0                   0

  Column 61

                   0


inner_code_BER =

  Columns 1 through 5

   0.442059265299197   0.438495140517212   0.434577689968610   0.430249752007699   0.425440710275914

  Columns 6 through 10

   0.420062485950892   0.414004155827468   0.407124705156026   0.399243281233111   0.390126191111209

  Columns 11 through 15

   0.379469900484071   0.366879750449458   0.351845805786628   0.333722159625866   0.311728699399704

  Columns 16 through 20

   0.285021607039339   0.252907304976643   0.215181564501605   0.172271173268218   0.125744433505888

  Columns 21 through 25

   0.080379797876579   0.036451127968054   0.002373858159555   0.001943444825933   0.001648425379811

  Columns 26 through 30

   0.001426772815337   0.001251739283591   0.001108999211342   0.000989933729641   0.000888935838715

  Columns 31 through 35

   0.000802146191349   0.000726792344742   0.000660814715802   0.000602641366482   0.000551045560236

  Columns 36 through 40

   0.000505051968965   0.000463872805331   0.000426863076928   0.000393488461396   0.000363301747511

  Columns 41 through 45

   0.000335925233266                   0                   0                   0                   0

  Columns 46 through 50

                   0                   0                   0                   0                   0

  Columns 51 through 55

                   0                   0                   0                   0                   0

  Columns 56 through 60

                   0                   0                   0                   0                   0

  Column 61

                   0


inner_code_BER =

  Columns 1 through 5

   0.442059265299197   0.438495140517212   0.434577689968610   0.430249752007699   0.425440710275914

  Columns 6 through 10

   0.420062485950892   0.414004155827468   0.407124705156026   0.399243281233111   0.390126191111209

  Columns 11 through 15

   0.379469900484071   0.366879750449458   0.351845805786628   0.333722159625866   0.311728699399704

  Columns 16 through 20

   0.285021607039339   0.252907304976643   0.215181564501605   0.172271173268218   0.125744433505888

  Columns 21 through 25

   0.080379797876579   0.036451127968054   0.002373858159555   0.001943444825933   0.001648425379811

  Columns 26 through 30

   0.001426772815337   0.001251739283591   0.001108999211342   0.000989933729641   0.000888935838715

  Columns 31 through 35

   0.000802146191349   0.000726792344742   0.000660814715802   0.000602641366482   0.000551045560236

  Columns 36 through 40

   0.000505051968965   0.000463872805331   0.000426863076928   0.000393488461396   0.000363301747511

  Columns 41 through 45

   0.000335925233266   0.000311037356126                   0                   0                   0

  Columns 46 through 50

                   0                   0                   0                   0                   0

  Columns 51 through 55

                   0                   0                   0                   0                   0

  Columns 56 through 60

                   0                   0                   0                   0                   0

  Column 61

                   0


inner_code_BER =

  Columns 1 through 5

   0.442059265299197   0.438495140517212   0.434577689968610   0.430249752007699   0.425440710275914

  Columns 6 through 10

   0.420062485950892   0.414004155827468   0.407124705156026   0.399243281233111   0.390126191111209

  Columns 11 through 15

   0.379469900484071   0.366879750449458   0.351845805786628   0.333722159625866   0.311728699399704

  Columns 16 through 20

   0.285021607039339   0.252907304976643   0.215181564501605   0.172271173268218   0.125744433505888

  Columns 21 through 25

   0.080379797876579   0.036451127968054   0.002373858159555   0.001943444825933   0.001648425379811

  Columns 26 through 30

   0.001426772815337   0.001251739283591   0.001108999211342   0.000989933729641   0.000888935838715

  Columns 31 through 35

   0.000802146191349   0.000726792344742   0.000660814715802   0.000602641366482   0.000551045560236

  Columns 36 through 40

   0.000505051968965   0.000463872805331   0.000426863076928   0.000393488461396   0.000363301747511

  Columns 41 through 45

   0.000335925233266   0.000311037356126   0.000288362387656                   0                   0

  Columns 46 through 50

                   0                   0                   0                   0                   0

  Columns 51 through 55

                   0                   0                   0                   0                   0

  Columns 56 through 60

                   0                   0                   0                   0                   0

  Column 61

                   0


inner_code_BER =

  Columns 1 through 5

   0.442059265299197   0.438495140517212   0.434577689968610   0.430249752007699   0.425440710275914

  Columns 6 through 10

   0.420062485950892   0.414004155827468   0.407124705156026   0.399243281233111   0.390126191111209

  Columns 11 through 15

   0.379469900484071   0.366879750449458   0.351845805786628   0.333722159625866   0.311728699399704

  Columns 16 through 20

   0.285021607039339   0.252907304976643   0.215181564501605   0.172271173268218   0.125744433505888

  Columns 21 through 25

   0.080379797876579   0.036451127968054   0.002373858159555   0.001943444825933   0.001648425379811

  Columns 26 through 30

   0.001426772815337   0.001251739283591   0.001108999211342   0.000989933729641   0.000888935838715

  Columns 31 through 35

   0.000802146191349   0.000726792344742   0.000660814715802   0.000602641366482   0.000551045560236

  Columns 36 through 40

   0.000505051968965   0.000463872805331   0.000426863076928   0.000393488461396   0.000363301747511

  Columns 41 through 45

   0.000335925233266   0.000311037356126   0.000288362387656   0.000267662384789                   0

  Columns 46 through 50

                   0                   0                   0                   0                   0

  Columns 51 through 55

                   0                   0                   0                   0                   0

  Columns 56 through 60

                   0                   0                   0                   0                   0

  Column 61

                   0


inner_code_BER =

  Columns 1 through 5

   0.442059265299197   0.438495140517212   0.434577689968610   0.430249752007699   0.425440710275914

  Columns 6 through 10

   0.420062485950892   0.414004155827468   0.407124705156026   0.399243281233111   0.390126191111209

  Columns 11 through 15

   0.379469900484071   0.366879750449458   0.351845805786628   0.333722159625866   0.311728699399704

  Columns 16 through 20

   0.285021607039339   0.252907304976643   0.215181564501605   0.172271173268218   0.125744433505888

  Columns 21 through 25

   0.080379797876579   0.036451127968054   0.002373858159555   0.001943444825933   0.001648425379811

  Columns 26 through 30

   0.001426772815337   0.001251739283591   0.001108999211342   0.000989933729641   0.000888935838715

  Columns 31 through 35

   0.000802146191349   0.000726792344742   0.000660814715802   0.000602641366482   0.000551045560236

  Columns 36 through 40

   0.000505051968965   0.000463872805331   0.000426863076928   0.000393488461396   0.000363301747511

  Columns 41 through 45

   0.000335925233266   0.000311037356126   0.000288362387656   0.000267662384789   0.000248730828474

  Columns 46 through 50

                   0                   0                   0                   0                   0

  Columns 51 through 55

                   0                   0                   0                   0                   0

  Columns 56 through 60

                   0                   0                   0                   0                   0

  Column 61

                   0


inner_code_BER =

  Columns 1 through 5

   0.442059265299197   0.438495140517212   0.434577689968610   0.430249752007699   0.425440710275914

  Columns 6 through 10

   0.420062485950892   0.414004155827468   0.407124705156026   0.399243281233111   0.390126191111209

  Columns 11 through 15

   0.379469900484071   0.366879750449458   0.351845805786628   0.333722159625866   0.311728699399704

  Columns 16 through 20

   0.285021607039339   0.252907304976643   0.215181564501605   0.172271173268218   0.125744433505888

  Columns 21 through 25

   0.080379797876579   0.036451127968054   0.002373858159555   0.001943444825933   0.001648425379811

  Columns 26 through 30

   0.001426772815337   0.001251739283591   0.001108999211342   0.000989933729641   0.000888935838715

  Columns 31 through 35

   0.000802146191349   0.000726792344742   0.000660814715802   0.000602641366482   0.000551045560236

  Columns 36 through 40

   0.000505051968965   0.000463872805331   0.000426863076928   0.000393488461396   0.000363301747511

  Columns 41 through 45

   0.000335925233266   0.000311037356126   0.000288362387656   0.000267662384789   0.000248730828474

  Columns 46 through 50

   0.000231387541439                   0                   0                   0                   0

  Columns 51 through 55

                   0                   0                   0                   0                   0

  Columns 56 through 60

                   0                   0                   0                   0                   0

  Column 61

                   0


inner_code_BER =

  Columns 1 through 5

   0.442059265299197   0.438495140517212   0.434577689968610   0.430249752007699   0.425440710275914

  Columns 6 through 10

   0.420062485950892   0.414004155827468   0.407124705156026   0.399243281233111   0.390126191111209

  Columns 11 through 15

   0.379469900484071   0.366879750449458   0.351845805786628   0.333722159625866   0.311728699399704

  Columns 16 through 20

   0.285021607039339   0.252907304976643   0.215181564501605   0.172271173268218   0.125744433505888

  Columns 21 through 25

   0.080379797876579   0.036451127968054   0.002373858159555   0.001943444825933   0.001648425379811

  Columns 26 through 30

   0.001426772815337   0.001251739283591   0.001108999211342   0.000989933729641   0.000888935838715

  Columns 31 through 35

   0.000802146191349   0.000726792344742   0.000660814715802   0.000602641366482   0.000551045560236

  Columns 36 through 40

   0.000505051968965   0.000463872805331   0.000426863076928   0.000393488461396   0.000363301747511

  Columns 41 through 45

   0.000335925233266   0.000311037356126   0.000288362387656   0.000267662384789   0.000248730828474

  Columns 46 through 50

   0.000231387541439   0.000215474587850                   0                   0                   0

  Columns 51 through 55

                   0                   0                   0                   0                   0

  Columns 56 through 60

                   0                   0                   0                   0                   0

  Column 61

                   0


inner_code_BER =

  Columns 1 through 5

   0.442059265299197   0.438495140517212   0.434577689968610   0.430249752007699   0.425440710275914

  Columns 6 through 10

   0.420062485950892   0.414004155827468   0.407124705156026   0.399243281233111   0.390126191111209

  Columns 11 through 15

   0.379469900484071   0.366879750449458   0.351845805786628   0.333722159625866   0.311728699399704

  Columns 16 through 20

   0.285021607039339   0.252907304976643   0.215181564501605   0.172271173268218   0.125744433505888

  Columns 21 through 25

   0.080379797876579   0.036451127968054   0.002373858159555   0.001943444825933   0.001648425379811

  Columns 26 through 30

   0.001426772815337   0.001251739283591   0.001108999211342   0.000989933729641   0.000888935838715

  Columns 31 through 35

   0.000802146191349   0.000726792344742   0.000660814715802   0.000602641366482   0.000551045560236

  Columns 36 through 40

   0.000505051968965   0.000463872805331   0.000426863076928   0.000393488461396   0.000363301747511

  Columns 41 through 45

   0.000335925233266   0.000311037356126   0.000288362387656   0.000267662384789   0.000248730828474

  Columns 46 through 50

   0.000231387541439   0.000215474587850   0.000200852935293                   0                   0

  Columns 51 through 55

                   0                   0                   0                   0                   0

  Columns 56 through 60

                   0                   0                   0                   0                   0

  Column 61

                   0


inner_code_BER =

  Columns 1 through 5

   0.442059265299197   0.438495140517212   0.434577689968610   0.430249752007699   0.425440710275914

  Columns 6 through 10

   0.420062485950892   0.414004155827468   0.407124705156026   0.399243281233111   0.390126191111209

  Columns 11 through 15

   0.379469900484071   0.366879750449458   0.351845805786628   0.333722159625866   0.311728699399704

  Columns 16 through 20

   0.285021607039339   0.252907304976643   0.215181564501605   0.172271173268218   0.125744433505888

  Columns 21 through 25

   0.080379797876579   0.036451127968054   0.002373858159555   0.001943444825933   0.001648425379811

  Columns 26 through 30

   0.001426772815337   0.001251739283591   0.001108999211342   0.000989933729641   0.000888935838715

  Columns 31 through 35

   0.000802146191349   0.000726792344742   0.000660814715802   0.000602641366482   0.000551045560236

  Columns 36 through 40

   0.000505051968965   0.000463872805331   0.000426863076928   0.000393488461396   0.000363301747511

  Columns 41 through 45

   0.000335925233266   0.000311037356126   0.000288362387656   0.000267662384789   0.000248730828474

  Columns 46 through 50

   0.000231387541439   0.000215474587850   0.000200852935293   0.000187399714875                   0

  Columns 51 through 55

                   0                   0                   0                   0                   0

  Columns 56 through 60

                   0                   0                   0                   0                   0

  Column 61

                   0


inner_code_BER =

  Columns 1 through 5

   0.442059265299197   0.438495140517212   0.434577689968610   0.430249752007699   0.425440710275914

  Columns 6 through 10

   0.420062485950892   0.414004155827468   0.407124705156026   0.399243281233111   0.390126191111209

  Columns 11 through 15

   0.379469900484071   0.366879750449458   0.351845805786628   0.333722159625866   0.311728699399704

  Columns 16 through 20

   0.285021607039339   0.252907304976643   0.215181564501605   0.172271173268218   0.125744433505888

  Columns 21 through 25

   0.080379797876579   0.036451127968054   0.002373858159555   0.001943444825933   0.001648425379811

  Columns 26 through 30

   0.001426772815337   0.001251739283591   0.001108999211342   0.000989933729641   0.000888935838715

  Columns 31 through 35

   0.000802146191349   0.000726792344742   0.000660814715802   0.000602641366482   0.000551045560236

  Columns 36 through 40

   0.000505051968965   0.000463872805331   0.000426863076928   0.000393488461396   0.000363301747511

  Columns 41 through 45

   0.000335925233266   0.000311037356126   0.000288362387656   0.000267662384789   0.000248730828474

  Columns 46 through 50

   0.000231387541439   0.000215474587850   0.000200852935293   0.000187399714875   0.000175005955123

  Columns 51 through 55

                   0                   0                   0                   0                   0

  Columns 56 through 60

                   0                   0                   0                   0                   0

  Column 61

                   0


inner_code_BER =

  Columns 1 through 5

   0.442059265299197   0.438495140517212   0.434577689968610   0.430249752007699   0.425440710275914

  Columns 6 through 10

   0.420062485950892   0.414004155827468   0.407124705156026   0.399243281233111   0.390126191111209

  Columns 11 through 15

   0.379469900484071   0.366879750449458   0.351845805786628   0.333722159625866   0.311728699399704

  Columns 16 through 20

   0.285021607039339   0.252907304976643   0.215181564501605   0.172271173268218   0.125744433505888

  Columns 21 through 25

   0.080379797876579   0.036451127968054   0.002373858159555   0.001943444825933   0.001648425379811

  Columns 26 through 30

   0.001426772815337   0.001251739283591   0.001108999211342   0.000989933729641   0.000888935838715

  Columns 31 through 35

   0.000802146191349   0.000726792344742   0.000660814715802   0.000602641366482   0.000551045560236

  Columns 36 through 40

   0.000505051968965   0.000463872805331   0.000426863076928   0.000393488461396   0.000363301747511

  Columns 41 through 45

   0.000335925233266   0.000311037356126   0.000288362387656   0.000267662384789   0.000248730828474

  Columns 46 through 50

   0.000231387541439   0.000215474587850   0.000200852935293   0.000187399714875   0.000175005955123

  Columns 51 through 55

   0.000163574694545                   0                   0                   0                   0

  Columns 56 through 60

                   0                   0                   0                   0                   0

  Column 61

                   0


inner_code_BER =

  Columns 1 through 5

   0.442059265299197   0.438495140517212   0.434577689968610   0.430249752007699   0.425440710275914

  Columns 6 through 10

   0.420062485950892   0.414004155827468   0.407124705156026   0.399243281233111   0.390126191111209

  Columns 11 through 15

   0.379469900484071   0.366879750449458   0.351845805786628   0.333722159625866   0.311728699399704

  Columns 16 through 20

   0.285021607039339   0.252907304976643   0.215181564501605   0.172271173268218   0.125744433505888

  Columns 21 through 25

   0.080379797876579   0.036451127968054   0.002373858159555   0.001943444825933   0.001648425379811

  Columns 26 through 30

   0.001426772815337   0.001251739283591   0.001108999211342   0.000989933729641   0.000888935838715

  Columns 31 through 35

   0.000802146191349   0.000726792344742   0.000660814715802   0.000602641366482   0.000551045560236

  Columns 36 through 40

   0.000505051968965   0.000463872805331   0.000426863076928   0.000393488461396   0.000363301747511

  Columns 41 through 45

   0.000335925233266   0.000311037356126   0.000288362387656   0.000267662384789   0.000248730828474

  Columns 46 through 50

   0.000231387541439   0.000215474587850   0.000200852935293   0.000187399714875   0.000175005955123

  Columns 51 through 55

   0.000163574694545   0.000153019399329                   0                   0                   0

  Columns 56 through 60

                   0                   0                   0                   0                   0

  Column 61

                   0


inner_code_BER =

  Columns 1 through 5

   0.442059265299197   0.438495140517212   0.434577689968610   0.430249752007699   0.425440710275914

  Columns 6 through 10

   0.420062485950892   0.414004155827468   0.407124705156026   0.399243281233111   0.390126191111209

  Columns 11 through 15

   0.379469900484071   0.366879750449458   0.351845805786628   0.333722159625866   0.311728699399704

  Columns 16 through 20

   0.285021607039339   0.252907304976643   0.215181564501605   0.172271173268218   0.125744433505888

  Columns 21 through 25

   0.080379797876579   0.036451127968054   0.002373858159555   0.001943444825933   0.001648425379811

  Columns 26 through 30

   0.001426772815337   0.001251739283591   0.001108999211342   0.000989933729641   0.000888935838715

  Columns 31 through 35

   0.000802146191349   0.000726792344742   0.000660814715802   0.000602641366482   0.000551045560236

  Columns 36 through 40

   0.000505051968965   0.000463872805331   0.000426863076928   0.000393488461396   0.000363301747511

  Columns 41 through 45

   0.000335925233266   0.000311037356126   0.000288362387656   0.000267662384789   0.000248730828474

  Columns 46 through 50

   0.000231387541439   0.000215474587850   0.000200852935293   0.000187399714875   0.000175005955123

  Columns 51 through 55

   0.000163574694545   0.000153019399329   0.000143262628832                   0                   0

  Columns 56 through 60

                   0                   0                   0                   0                   0

  Column 61

                   0


inner_code_BER =

  Columns 1 through 5

   0.442059265299197   0.438495140517212   0.434577689968610   0.430249752007699   0.425440710275914

  Columns 6 through 10

   0.420062485950892   0.414004155827468   0.407124705156026   0.399243281233111   0.390126191111209

  Columns 11 through 15

   0.379469900484071   0.366879750449458   0.351845805786628   0.333722159625866   0.311728699399704

  Columns 16 through 20

   0.285021607039339   0.252907304976643   0.215181564501605   0.172271173268218   0.125744433505888

  Columns 21 through 25

   0.080379797876579   0.036451127968054   0.002373858159555   0.001943444825933   0.001648425379811

  Columns 26 through 30

   0.001426772815337   0.001251739283591   0.001108999211342   0.000989933729641   0.000888935838715

  Columns 31 through 35

   0.000802146191349   0.000726792344742   0.000660814715802   0.000602641366482   0.000551045560236

  Columns 36 through 40

   0.000505051968965   0.000463872805331   0.000426863076928   0.000393488461396   0.000363301747511

  Columns 41 through 45

   0.000335925233266   0.000311037356126   0.000288362387656   0.000267662384789   0.000248730828474

  Columns 46 through 50

   0.000231387541439   0.000215474587850   0.000200852935293   0.000187399714875   0.000175005955123

  Columns 51 through 55

   0.000163574694545   0.000153019399329   0.000143262628832   0.000134234903697                   0

  Columns 56 through 60

                   0                   0                   0                   0                   0

  Column 61

                   0


inner_code_BER =

  Columns 1 through 5

   0.442059265299197   0.438495140517212   0.434577689968610   0.430249752007699   0.425440710275914

  Columns 6 through 10

   0.420062485950892   0.414004155827468   0.407124705156026   0.399243281233111   0.390126191111209

  Columns 11 through 15

   0.379469900484071   0.366879750449458   0.351845805786628   0.333722159625866   0.311728699399704

  Columns 16 through 20

   0.285021607039339   0.252907304976643   0.215181564501605   0.172271173268218   0.125744433505888

  Columns 21 through 25

   0.080379797876579   0.036451127968054   0.002373858159555   0.001943444825933   0.001648425379811

  Columns 26 through 30

   0.001426772815337   0.001251739283591   0.001108999211342   0.000989933729641   0.000888935838715

  Columns 31 through 35

   0.000802146191349   0.000726792344742   0.000660814715802   0.000602641366482   0.000551045560236

  Columns 36 through 40

   0.000505051968965   0.000463872805331   0.000426863076928   0.000393488461396   0.000363301747511

  Columns 41 through 45

   0.000335925233266   0.000311037356126   0.000288362387656   0.000267662384789   0.000248730828474

  Columns 46 through 50

   0.000231387541439   0.000215474587850   0.000200852935293   0.000187399714875   0.000175005955123

  Columns 51 through 55

   0.000163574694545   0.000153019399329   0.000143262628832   0.000134234903697   0.000125873740801

  Columns 56 through 60

                   0                   0                   0                   0                   0

  Column 61

                   0


inner_code_BER =

  Columns 1 through 5

   0.442059265299197   0.438495140517212   0.434577689968610   0.430249752007699   0.425440710275914

  Columns 6 through 10

   0.420062485950892   0.414004155827468   0.407124705156026   0.399243281233111   0.390126191111209

  Columns 11 through 15

   0.379469900484071   0.366879750449458   0.351845805786628   0.333722159625866   0.311728699399704

  Columns 16 through 20

   0.285021607039339   0.252907304976643   0.215181564501605   0.172271173268218   0.125744433505888

  Columns 21 through 25

   0.080379797876579   0.036451127968054   0.002373858159555   0.001943444825933   0.001648425379811

  Columns 26 through 30

   0.001426772815337   0.001251739283591   0.001108999211342   0.000989933729641   0.000888935838715

  Columns 31 through 35

   0.000802146191349   0.000726792344742   0.000660814715802   0.000602641366482   0.000551045560236

  Columns 36 through 40

   0.000505051968965   0.000463872805331   0.000426863076928   0.000393488461396   0.000363301747511

  Columns 41 through 45

   0.000335925233266   0.000311037356126   0.000288362387656   0.000267662384789   0.000248730828474

  Columns 46 through 50

   0.000231387541439   0.000215474587850   0.000200852935293   0.000187399714875   0.000175005955123

  Columns 51 through 55

   0.000163574694545   0.000153019399329   0.000143262628832   0.000134234903697   0.000125873740801

  Columns 56 through 60

   0.000118122826408                   0                   0                   0                   0

  Column 61

                   0


inner_code_BER =

  Columns 1 through 5

   0.442059265299197   0.438495140517212   0.434577689968610   0.430249752007699   0.425440710275914

  Columns 6 through 10

   0.420062485950892   0.414004155827468   0.407124705156026   0.399243281233111   0.390126191111209

  Columns 11 through 15

   0.379469900484071   0.366879750449458   0.351845805786628   0.333722159625866   0.311728699399704

  Columns 16 through 20

   0.285021607039339   0.252907304976643   0.215181564501605   0.172271173268218   0.125744433505888

  Columns 21 through 25

   0.080379797876579   0.036451127968054   0.002373858159555   0.001943444825933   0.001648425379811

  Columns 26 through 30

   0.001426772815337   0.001251739283591   0.001108999211342   0.000989933729641   0.000888935838715

  Columns 31 through 35

   0.000802146191349   0.000726792344742   0.000660814715802   0.000602641366482   0.000551045560236

  Columns 36 through 40

   0.000505051968965   0.000463872805331   0.000426863076928   0.000393488461396   0.000363301747511

  Columns 41 through 45

   0.000335925233266   0.000311037356126   0.000288362387656   0.000267662384789   0.000248730828474

  Columns 46 through 50

   0.000231387541439   0.000215474587850   0.000200852935293   0.000187399714875   0.000175005955123

  Columns 51 through 55

   0.000163574694545   0.000153019399329   0.000143262628832   0.000134234903697   0.000125873740801

  Columns 56 through 60

   0.000118122826408   0.000110931304493                   0                   0                   0

  Column 61

                   0


inner_code_BER =

  Columns 1 through 5

   0.442059265299197   0.438495140517212   0.434577689968610   0.430249752007699   0.425440710275914

  Columns 6 through 10

   0.420062485950892   0.414004155827468   0.407124705156026   0.399243281233111   0.390126191111209

  Columns 11 through 15

   0.379469900484071   0.366879750449458   0.351845805786628   0.333722159625866   0.311728699399704

  Columns 16 through 20

   0.285021607039339   0.252907304976643   0.215181564501605   0.172271173268218   0.125744433505888

  Columns 21 through 25

   0.080379797876579   0.036451127968054   0.002373858159555   0.001943444825933   0.001648425379811

  Columns 26 through 30

   0.001426772815337   0.001251739283591   0.001108999211342   0.000989933729641   0.000888935838715

  Columns 31 through 35

   0.000802146191349   0.000726792344742   0.000660814715802   0.000602641366482   0.000551045560236

  Columns 36 through 40

   0.000505051968965   0.000463872805331   0.000426863076928   0.000393488461396   0.000363301747511

  Columns 41 through 45

   0.000335925233266   0.000311037356126   0.000288362387656   0.000267662384789   0.000248730828474

  Columns 46 through 50

   0.000231387541439   0.000215474587850   0.000200852935293   0.000187399714875   0.000175005955123

  Columns 51 through 55

   0.000163574694545   0.000153019399329   0.000143262628832   0.000134234903697   0.000125873740801

  Columns 56 through 60

   0.000118122826408   0.000110931304493   0.000104253161556                   0                   0

  Column 61

                   0


inner_code_BER =

  Columns 1 through 5

   0.442059265299197   0.438495140517212   0.434577689968610   0.430249752007699   0.425440710275914

  Columns 6 through 10

   0.420062485950892   0.414004155827468   0.407124705156026   0.399243281233111   0.390126191111209

  Columns 11 through 15

   0.379469900484071   0.366879750449458   0.351845805786628   0.333722159625866   0.311728699399704

  Columns 16 through 20

   0.285021607039339   0.252907304976643   0.215181564501605   0.172271173268218   0.125744433505888

  Columns 21 through 25

   0.080379797876579   0.036451127968054   0.002373858159555   0.001943444825933   0.001648425379811

  Columns 26 through 30

   0.001426772815337   0.001251739283591   0.001108999211342   0.000989933729641   0.000888935838715

  Columns 31 through 35

   0.000802146191349   0.000726792344742   0.000660814715802   0.000602641366482   0.000551045560236

  Columns 36 through 40

   0.000505051968965   0.000463872805331   0.000426863076928   0.000393488461396   0.000363301747511

  Columns 41 through 45

   0.000335925233266   0.000311037356126   0.000288362387656   0.000267662384789   0.000248730828474

  Columns 46 through 50

   0.000231387541439   0.000215474587850   0.000200852935293   0.000187399714875   0.000175005955123

  Columns 51 through 55

   0.000163574694545   0.000153019399329   0.000143262628832   0.000134234903697   0.000125873740801

  Columns 56 through 60

   0.000118122826408   0.000110931304493   0.000104253161556   0.000098046692710                   0

  Column 61

                   0

µ±Ç°ÄÚÂëÎóÂëÂÊÒÑµÍÓÚÄ¿±êÎóÂëÂÊ£¬ÐÅÔë±ÈÎª5.80 dB
Elapsed time is 30084.566352 seconds.
