# Supplementary material for: An Efficient Design of Systematic Rateless Codes
Source: Hindawi journal article supplement (doi:10.1155/2020/8068414), 2020-05-19
Supplement: f1 [file 8068414.f1.zip › supplementary files/Matlab_code_for_Figure1/BER_by_DDE/仿真结果/BER_by_DDE_rayl_rate_1_2_dist0_s.txt]

��ǰ�ŵ�Ϊ�����ŵ�

EbN0indB_vec =

  Columns 1 through 5

                   0   0.100000000000000   0.200000000000000   0.300000000000000   0.400000000000000

  Columns 6 through 10

   0.500000000000000   0.600000000000000   0.700000000000000   0.800000000000000   0.900000000000000

  Columns 11 through 15

   1.000000000000000   1.100000000000000   1.200000000000000   1.300000000000000   1.400000000000000

  Columns 16 through 20

   1.500000000000000   1.600000000000000   1.700000000000000   1.800000000000000   1.900000000000000

  Columns 21 through 25

   2.000000000000000   2.100000000000000   2.200000000000000   2.300000000000000   2.400000000000000

  Columns 26 through 30

   2.500000000000000   2.600000000000000   2.700000000000000   2.800000000000000   2.900000000000000

  Columns 31 through 35

   3.000000000000000   3.100000000000000   3.200000000000000   3.300000000000000   3.400000000000000

  Columns 36 through 40

   3.500000000000000   3.600000000000000   3.700000000000000   3.800000000000000   3.900000000000000

  Columns 41 through 45

   4.000000000000000   4.100000000000000   4.200000000000000   4.300000000000000   4.400000000000000

  Columns 46 through 50

   4.500000000000000   4.600000000000000   4.700000000000000   4.800000000000000   4.900000000000000

  Columns 51 through 55

   5.000000000000000   5.100000000000000   5.200000000000000   5.300000000000000   5.400000000000000

  Columns 56 through 60

   5.500000000000000   5.600000000000000   5.700000000000000   5.800000000000000   5.900000000000000

  Column 61

   6.000000000000000

�Ʊ��ɹ�
��ǰѡ��Raptor�뵱ǰѡ��ϵͳ��
������=0.50000, ��������=0.98039, ��������=0.51000

out_node_index =

     1     2     3     4     5     8     9    19    65    66


ans =

  Columns 1 through 5

   0.007969000000000   0.493570000000000   0.166220000000000   0.072646000000000   0.082558000000000

  Columns 6 through 10

   0.056058000000000   0.037229000000000   0.055590000000000   0.025023000000000   0.003135000000000


inner_code_BER =

  Columns 1 through 5

   0.141500879323390                   0                   0                   0                   0

  Columns 6 through 10

                   0                   0                   0                   0                   0

  Columns 11 through 15

                   0                   0                   0                   0                   0

  Columns 16 through 20

                   0                   0                   0                   0                   0

  Columns 21 through 25

                   0                   0                   0                   0                   0

  Columns 26 through 30

                   0                   0                   0                   0                   0

  Columns 31 through 35

                   0                   0                   0                   0                   0

  Columns 36 through 40

                   0                   0                   0                   0                   0

  Columns 41 through 45

                   0                   0                   0                   0                   0

  Columns 46 through 50

                   0                   0                   0                   0                   0

  Columns 51 through 55

                   0                   0                   0                   0                   0

  Columns 56 through 60

                   0                   0                   0                   0                   0

  Column 61

                   0


outer_code_BER =

  Columns 1 through 5

   0.141500879323390                   0                   0                   0                   0

  Columns 6 through 10

                   0                   0                   0                   0                   0

  Columns 11 through 15

                   0                   0                   0                   0                   0

  Columns 16 through 20

                   0                   0                   0                   0                   0

  Columns 21 through 25

                   0                   0                   0                   0                   0

  Columns 26 through 30

                   0                   0                   0                   0                   0

  Columns 31 through 35

                   0                   0                   0                   0                   0

  Columns 36 through 40

                   0                   0                   0                   0                   0

  Columns 41 through 45

                   0                   0                   0                   0                   0

  Columns 46 through 50

                   0                   0                   0                   0                   0

  Columns 51 through 55

                   0                   0                   0                   0                   0

  Columns 56 through 60

                   0                   0                   0                   0                   0

  Column 61

                   0


inner_code_BER =

  Columns 1 through 5

   0.141500879323390   0.138175148203252                   0                   0                   0

  Columns 6 through 10

                   0                   0                   0                   0                   0

  Columns 11 through 15

                   0                   0                   0                   0                   0

  Columns 16 through 20

                   0                   0                   0                   0                   0

  Columns 21 through 25

                   0                   0                   0                   0                   0

  Columns 26 through 30

                   0                   0                   0                   0                   0

  Columns 31 through 35

                   0                   0                   0                   0                   0

  Columns 36 through 40

                   0                   0                   0                   0                   0

  Columns 41 through 45

                   0                   0                   0                   0                   0

  Columns 46 through 50

                   0                   0                   0                   0                   0

  Columns 51 through 55

                   0                   0                   0                   0                   0

  Columns 56 through 60

                   0                   0                   0                   0                   0

  Column 61

                   0


outer_code_BER =

  Columns 1 through 5

   0.141500879323390   0.138175148203252                   0                   0                   0

  Columns 6 through 10

                   0                   0                   0                   0                   0

  Columns 11 through 15

                   0                   0                   0                   0                   0

  Columns 16 through 20

                   0                   0                   0                   0                   0

  Columns 21 through 25

                   0                   0                   0                   0                   0

  Columns 26 through 30

                   0                   0                   0                   0                   0

  Columns 31 through 35

                   0                   0                   0                   0                   0

  Columns 36 through 40

                   0                   0                   0                   0                   0

  Columns 41 through 45

                   0                   0                   0                   0                   0

  Columns 46 through 50

                   0                   0                   0                   0                   0

  Columns 51 through 55

                   0                   0                   0                   0                   0

  Columns 56 through 60

                   0                   0                   0                   0                   0

  Column 61

                   0


inner_code_BER =

  Columns 1 through 5

   0.141500879323390   0.138175148203252   0.134853729924419                   0                   0

  Columns 6 through 10

                   0                   0                   0                   0                   0

  Columns 11 through 15

                   0                   0                   0                   0                   0

  Columns 16 through 20

                   0                   0                   0                   0                   0

  Columns 21 through 25

                   0                   0                   0                   0                   0

  Columns 26 through 30

                   0                   0                   0                   0                   0

  Columns 31 through 35

                   0                   0                   0                   0                   0

  Columns 36 through 40

                   0                   0                   0                   0                   0

  Columns 41 through 45

                   0                   0                   0                   0                   0

  Columns 46 through 50

                   0                   0                   0                   0                   0

  Columns 51 through 55

                   0                   0                   0                   0                   0

  Columns 56 through 60

                   0                   0                   0                   0                   0

  Column 61

                   0


outer_code_BER =

  Columns 1 through 5

   0.141500879323390   0.138175148203252   0.134853729924419                   0                   0

  Columns 6 through 10

                   0                   0                   0                   0                   0

  Columns 11 through 15

                   0                   0                   0                   0                   0

  Columns 16 through 20

                   0                   0                   0                   0                   0

  Columns 21 through 25

                   0                   0                   0                   0                   0

  Columns 26 through 30

                   0                   0                   0                   0                   0

  Columns 31 through 35

                   0                   0                   0                   0                   0

  Columns 36 through 40

                   0                   0                   0                   0                   0

  Columns 41 through 45

                   0                   0                   0                   0                   0

  Columns 46 through 50

                   0                   0                   0                   0                   0

  Columns 51 through 55

                   0                   0                   0                   0                   0

  Columns 56 through 60

                   0                   0                   0                   0                   0

  Column 61

                   0


inner_code_BER =

  Columns 1 through 5

   0.141500879323390   0.138175148203252   0.134853729924419   0.131538204629457                   0

  Columns 6 through 10

                   0                   0                   0                   0                   0

  Columns 11 through 15

                   0                   0                   0                   0                   0

  Columns 16 through 20

                   0                   0                   0                   0                   0

  Columns 21 through 25

                   0                   0                   0                   0                   0

  Columns 26 through 30

                   0                   0                   0                   0                   0

  Columns 31 through 35

                   0                   0                   0                   0                   0

  Columns 36 through 40

                   0                   0                   0                   0                   0

  Columns 41 through 45

                   0                   0                   0                   0                   0

  Columns 46 through 50

                   0                   0                   0                   0                   0

  Columns 51 through 55

                   0                   0                   0                   0                   0

  Columns 56 through 60

                   0                   0                   0                   0                   0

  Column 61

                   0


outer_code_BER =

  Columns 1 through 5

   0.141500879323390   0.138175148203252   0.134853729924419   0.131538204629458                   0

  Columns 6 through 10

                   0                   0                   0                   0                   0

  Columns 11 through 15

                   0                   0                   0                   0                   0

  Columns 16 through 20

                   0                   0                   0                   0                   0

  Columns 21 through 25

                   0                   0                   0                   0                   0

  Columns 26 through 30

                   0                   0                   0                   0                   0

  Columns 31 through 35

                   0                   0                   0                   0                   0

  Columns 36 through 40

                   0                   0                   0                   0                   0

  Columns 41 through 45

                   0                   0                   0                   0                   0

  Columns 46 through 50

                   0                   0                   0                   0                   0

  Columns 51 through 55

                   0                   0                   0                   0                   0

  Columns 56 through 60

                   0                   0                   0                   0                   0

  Column 61

                   0


inner_code_BER =

  Columns 1 through 5

   0.141500879323390   0.138175148203252   0.134853729924419   0.131538204629457   0.128230195980865

  Columns 6 through 10

                   0                   0                   0                   0                   0

  Columns 11 through 15

                   0                   0                   0                   0                   0

  Columns 16 through 20

                   0                   0                   0                   0                   0

  Columns 21 through 25

                   0                   0                   0                   0                   0

  Columns 26 through 30

                   0                   0                   0                   0                   0

  Columns 31 through 35

                   0                   0                   0                   0                   0

  Columns 36 through 40

                   0                   0                   0                   0                   0

  Columns 41 through 45

                   0                   0                   0                   0                   0

  Columns 46 through 50

                   0                   0                   0                   0                   0

  Columns 51 through 55

                   0                   0                   0                   0                   0

  Columns 56 through 60

                   0                   0                   0                   0                   0

  Column 61

                   0


outer_code_BER =

  Columns 1 through 5

   0.141500879323390   0.138175148203252   0.134853729924419   0.131538204629458   0.128230195980865

  Columns 6 through 10

                   0                   0                   0                   0                   0

  Columns 11 through 15

                   0                   0                   0                   0                   0

  Columns 16 through 20

                   0                   0                   0                   0                   0

  Columns 21 through 25

                   0                   0                   0                   0                   0

  Columns 26 through 30

                   0                   0                   0                   0                   0

  Columns 31 through 35

                   0                   0                   0                   0                   0

  Columns 36 through 40

                   0                   0                   0                   0                   0

  Columns 41 through 45

                   0                   0                   0                   0                   0

  Columns 46 through 50

                   0                   0                   0                   0                   0

  Columns 51 through 55

                   0                   0                   0                   0                   0

  Columns 56 through 60

                   0                   0                   0                   0                   0

  Column 61

                   0


inner_code_BER =

  Columns 1 through 5

   0.141500879323390   0.138175148203252   0.134853729924419   0.131538204629457   0.128230195980865

  Columns 6 through 10

   0.124931368648881                   0                   0                   0                   0

  Columns 11 through 15

                   0                   0                   0                   0                   0

  Columns 16 through 20

                   0                   0                   0                   0                   0

  Columns 21 through 25

                   0                   0                   0                   0                   0

  Columns 26 through 30

                   0                   0                   0                   0                   0

  Columns 31 through 35

                   0                   0                   0                   0                   0

  Columns 36 through 40

                   0                   0                   0                   0                   0

  Columns 41 through 45

                   0                   0                   0                   0                   0

  Columns 46 through 50

                   0                   0                   0                   0                   0

  Columns 51 through 55

                   0                   0                   0                   0                   0

  Columns 56 through 60

                   0                   0                   0                   0                   0

  Column 61

                   0


outer_code_BER =

  Columns 1 through 5

   0.141500879323390   0.138175148203252   0.134853729924419   0.131538204629458   0.128230195980865

  Columns 6 through 10

   0.124931368648882                   0                   0                   0                   0

  Columns 11 through 15

                   0                   0                   0                   0                   0

  Columns 16 through 20

                   0                   0                   0                   0                   0

  Columns 21 through 25

                   0                   0                   0                   0                   0

  Columns 26 through 30

                   0                   0                   0                   0                   0

  Columns 31 through 35

                   0                   0                   0                   0                   0

  Columns 36 through 40

                   0                   0                   0                   0                   0

  Columns 41 through 45

                   0                   0                   0                   0                   0

  Columns 46 through 50

                   0                   0                   0                   0                   0

  Columns 51 through 55

                   0                   0                   0                   0                   0

  Columns 56 through 60

                   0                   0                   0                   0                   0

  Column 61

                   0


inner_code_BER =

  Columns 1 through 5

   0.141500879323390   0.138175148203252   0.134853729924419   0.131538204629457   0.128230195980865

  Columns 6 through 10

   0.124931368648881   0.121643425202649                   0                   0                   0

  Columns 11 through 15

                   0                   0                   0                   0                   0

  Columns 16 through 20

                   0                   0                   0                   0                   0

  Columns 21 through 25

                   0                   0                   0                   0                   0

  Columns 26 through 30

                   0                   0                   0                   0                   0

  Columns 31 through 35

                   0                   0                   0                   0                   0

  Columns 36 through 40

                   0                   0                   0                   0                   0

  Columns 41 through 45

                   0                   0                   0                   0                   0

  Columns 46 through 50

                   0                   0                   0                   0                   0

  Columns 51 through 55

                   0                   0                   0                   0                   0

  Columns 56 through 60

                   0                   0                   0                   0                   0

  Column 61

                   0


outer_code_BER =

  Columns 1 through 5

   0.141500879323390   0.138175148203252   0.134853729924419   0.131538204629458   0.128230195980865

  Columns 6 through 10

   0.124931368648882   0.121643425202650                   0                   0                   0

  Columns 11 through 15

                   0                   0                   0                   0                   0

  Columns 16 through 20

                   0                   0                   0                   0                   0

  Columns 21 through 25

                   0                   0                   0                   0                   0

  Columns 26 through 30

                   0                   0                   0                   0                   0

  Columns 31 through 35

                   0                   0                   0                   0                   0

  Columns 36 through 40

                   0                   0                   0                   0                   0

  Columns 41 through 45

                   0                   0                   0                   0                   0

  Columns 46 through 50

                   0                   0                   0                   0                   0

  Columns 51 through 55

                   0                   0                   0                   0                   0

  Columns 56 through 60

                   0                   0                   0                   0                   0

  Column 61

                   0


inner_code_BER =

  Columns 1 through 5

   0.141500879323390   0.138175148203252   0.134853729924419   0.131538204629457   0.128230195980865

  Columns 6 through 10

   0.124931368648881   0.121643425202649   0.118368102385146                   0                   0

  Columns 11 through 15

                   0                   0                   0                   0                   0

  Columns 16 through 20

                   0                   0                   0                   0                   0

  Columns 21 through 25

                   0                   0                   0                   0                   0

  Columns 26 through 30

                   0                   0                   0                   0                   0

  Columns 31 through 35

                   0                   0                   0                   0                   0

  Columns 36 through 40

                   0                   0                   0                   0                   0

  Columns 41 through 45

                   0                   0                   0                   0                   0

  Columns 46 through 50

                   0                   0                   0                   0                   0

  Columns 51 through 55

                   0                   0                   0                   0                   0

  Columns 56 through 60

                   0                   0                   0                   0                   0

  Column 61

                   0


outer_code_BER =

  Columns 1 through 5

   0.141500879323390   0.138175148203252   0.134853729924419   0.131538204629458   0.128230195980865

  Columns 6 through 10

   0.124931368648882   0.121643425202650   0.118368102385146                   0                   0

  Columns 11 through 15

                   0                   0                   0                   0                   0

  Columns 16 through 20

                   0                   0                   0                   0                   0

  Columns 21 through 25

                   0                   0                   0                   0                   0

  Columns 26 through 30

                   0                   0                   0                   0                   0

  Columns 31 through 35

                   0                   0                   0                   0                   0

  Columns 36 through 40

                   0                   0                   0                   0                   0

  Columns 41 through 45

                   0                   0                   0                   0                   0

  Columns 46 through 50

                   0                   0                   0                   0                   0

  Columns 51 through 55

                   0                   0                   0                   0                   0

  Columns 56 through 60

                   0                   0                   0                   0                   0

  Column 61

                   0


inner_code_BER =

  Columns 1 through 5

   0.141500879323390   0.138175148203252   0.134853729924419   0.131538204629457   0.128230195980865

  Columns 6 through 10

   0.124931368648881   0.121643425202649   0.118368102385146   0.115107166774748                   0

  Columns 11 through 15

                   0                   0                   0                   0                   0

  Columns 16 through 20

                   0                   0                   0                   0                   0

  Columns 21 through 25

                   0                   0                   0                   0                   0

  Columns 26 through 30

                   0                   0                   0                   0                   0

  Columns 31 through 35

                   0                   0                   0                   0                   0

  Columns 36 through 40

                   0                   0                   0                   0                   0

  Columns 41 through 45

                   0                   0                   0                   0                   0

  Columns 46 through 50

                   0                   0                   0                   0                   0

  Columns 51 through 55

                   0                   0                   0                   0                   0

  Columns 56 through 60

                   0                   0                   0                   0                   0

  Column 61

                   0


outer_code_BER =

  Columns 1 through 5

   0.141500879323390   0.138175148203252   0.134853729924419   0.131538204629458   0.128230195980865

  Columns 6 through 10

   0.124931368648882   0.121643425202650   0.118368102385146   0.115107166774749                   0

  Columns 11 through 15

                   0                   0                   0                   0                   0

  Columns 16 through 20

                   0                   0                   0                   0                   0

  Columns 21 through 25

                   0                   0                   0                   0                   0

  Columns 26 through 30

                   0                   0                   0                   0                   0

  Columns 31 through 35

                   0                   0                   0                   0                   0

  Columns 36 through 40

                   0                   0                   0                   0                   0

  Columns 41 through 45

                   0                   0                   0                   0                   0

  Columns 46 through 50

                   0                   0                   0                   0                   0

  Columns 51 through 55

                   0                   0                   0                   0                   0

  Columns 56 through 60

                   0                   0                   0                   0                   0

  Column 61

                   0


inner_code_BER =

  Columns 1 through 5

   0.141500879323390   0.138175148203252   0.134853729924419   0.131538204629457   0.128230195980865

  Columns 6 through 10

   0.124931368648881   0.121643425202649   0.118368102385146   0.115107166774748   0.111862409864375

  Columns 11 through 15

                   0                   0                   0                   0                   0

  Columns 16 through 20

                   0                   0                   0                   0                   0

  Columns 21 through 25

                   0                   0                   0                   0                   0

  Columns 26 through 30

                   0                   0                   0                   0                   0

  Columns 31 through 35

                   0                   0                   0                   0                   0

  Columns 36 through 40

                   0                   0                   0                   0                   0

  Columns 41 through 45

                   0                   0                   0                   0                   0

  Columns 46 through 50

                   0                   0                   0                   0                   0

  Columns 51 through 55

                   0                   0                   0                   0                   0

  Columns 56 through 60

                   0                   0                   0                   0                   0

  Column 61

                   0


outer_code_BER =

  Columns 1 through 5

   0.141500879323390   0.138175148203252   0.134853729924419   0.131538204629458   0.128230195980865

  Columns 6 through 10

   0.124931368648882   0.121643425202650   0.118368102385146   0.115107166774749   0.111862409864376

  Columns 11 through 15

                   0                   0                   0                   0                   0

  Columns 16 through 20

                   0                   0                   0                   0                   0

  Columns 21 through 25

                   0                   0                   0                   0                   0

  Columns 26 through 30

                   0                   0                   0                   0                   0

  Columns 31 through 35

                   0                   0                   0                   0                   0

  Columns 36 through 40

                   0                   0                   0                   0                   0

  Columns 41 through 45

                   0                   0                   0                   0                   0

  Columns 46 through 50

                   0                   0                   0                   0                   0

  Columns 51 through 55

                   0                   0                   0                   0                   0

  Columns 56 through 60

                   0                   0                   0                   0                   0

  Column 61

                   0


inner_code_BER =

  Columns 1 through 5

   0.141500879323390   0.138175148203252   0.134853729924419   0.131538204629457   0.128230195980865

  Columns 6 through 10

   0.124931368648881   0.121643425202649   0.118368102385146   0.115107166774748   0.111862409864375

  Columns 11 through 15

   0.108635642622936                   0                   0                   0                   0

  Columns 16 through 20

                   0                   0                   0                   0                   0

  Columns 21 through 25

                   0                   0                   0                   0                   0

  Columns 26 through 30

                   0                   0                   0                   0                   0

  Columns 31 through 35

                   0                   0                   0                   0                   0

  Columns 36 through 40

                   0                   0                   0                   0                   0

  Columns 41 through 45

                   0                   0                   0                   0                   0

  Columns 46 through 50

                   0                   0                   0                   0                   0

  Columns 51 through 55

                   0                   0                   0                   0                   0

  Columns 56 through 60

                   0                   0                   0                   0                   0

  Column 61

                   0


outer_code_BER =

  Columns 1 through 5

   0.141500879323390   0.138175148203252   0.134853729924419   0.131538204629458   0.128230195980865

  Columns 6 through 10

   0.124931368648882   0.121643425202650   0.118368102385146   0.115107166774749   0.111862409864376

  Columns 11 through 15

   0.108635642622937                   0                   0                   0                   0

  Columns 16 through 20

                   0                   0                   0                   0                   0

  Columns 21 through 25

                   0                   0                   0                   0                   0

  Columns 26 through 30

                   0                   0                   0                   0                   0

  Columns 31 through 35

                   0                   0                   0                   0                   0

  Columns 36 through 40

                   0                   0                   0                   0                   0

  Columns 41 through 45

                   0                   0                   0                   0                   0

  Columns 46 through 50

                   0                   0                   0                   0                   0

  Columns 51 through 55

                   0                   0                   0                   0                   0

  Columns 56 through 60

                   0                   0                   0                   0                   0

  Column 61

                   0


inner_code_BER =

  Columns 1 through 5

   0.141500879323390   0.138175148203252   0.134853729924419   0.131538204629457   0.128230195980865

  Columns 6 through 10

   0.124931368648881   0.121643425202649   0.118368102385146   0.115107166774748   0.111862409864375

  Columns 11 through 15

   0.108635642622936   0.105428689642400                   0                   0                   0

  Columns 16 through 20

                   0                   0                   0                   0                   0

  Columns 21 through 25

                   0                   0                   0                   0                   0

  Columns 26 through 30

                   0                   0                   0                   0                   0

  Columns 31 through 35

                   0                   0                   0                   0                   0

  Columns 36 through 40

                   0                   0                   0                   0                   0

  Columns 41 through 45

                   0                   0                   0                   0                   0

  Columns 46 through 50

                   0                   0                   0                   0                   0

  Columns 51 through 55

                   0                   0                   0                   0                   0

  Columns 56 through 60

                   0                   0                   0                   0                   0

  Column 61

                   0


outer_code_BER =

  Columns 1 through 5

   0.141500879323390   0.138175148203252   0.134853729924419   0.131538204629458   0.128230195980865

  Columns 6 through 10

   0.124931368648882   0.121643425202650   0.118368102385146   0.115107166774749   0.111862409864376

  Columns 11 through 15

   0.108635642622937   0.105428689642400                   0                   0                   0

  Columns 16 through 20

                   0                   0                   0                   0                   0

  Columns 21 through 25

                   0                   0                   0                   0                   0

  Columns 26 through 30

                   0                   0                   0                   0                   0

  Columns 31 through 35

                   0                   0                   0                   0                   0

  Columns 36 through 40

                   0                   0                   0                   0                   0

  Columns 41 through 45

                   0                   0                   0                   0                   0

  Columns 46 through 50

                   0                   0                   0                   0                   0

  Columns 51 through 55

                   0                   0                   0                   0                   0

  Columns 56 through 60

                   0                   0                   0                   0                   0

  Column 61

                   0


inner_code_BER =

  Columns 1 through 5

   0.141500879323390   0.138175148203252   0.134853729924419   0.131538204629457   0.128230195980865

  Columns 6 through 10

   0.124931368648881   0.121643425202649   0.118368102385146   0.115107166774748   0.111862409864375

  Columns 11 through 15

   0.108635642622936   0.105428689642400   0.102243383016212                   0                   0

  Columns 16 through 20

                   0                   0                   0                   0                   0

  Columns 21 through 25

                   0                   0                   0                   0                   0

  Columns 26 through 30

                   0                   0                   0                   0                   0

  Columns 31 through 35

                   0                   0                   0                   0                   0

  Columns 36 through 40

                   0                   0                   0                   0                   0

  Columns 41 through 45

                   0                   0                   0                   0                   0

  Columns 46 through 50

                   0                   0                   0                   0                   0

  Columns 51 through 55

                   0                   0                   0                   0                   0

  Columns 56 through 60

                   0                   0                   0                   0                   0

  Column 61

                   0


outer_code_BER =

  Columns 1 through 5

   0.141500879323390   0.138175148203252   0.134853729924419   0.131538204629458   0.128230195980865

  Columns 6 through 10

   0.124931368648882   0.121643425202650   0.118368102385146   0.115107166774749   0.111862409864376

  Columns 11 through 15

   0.108635642622937   0.105428689642400   0.102243383016213                   0                   0

  Columns 16 through 20

                   0                   0                   0                   0                   0

  Columns 21 through 25

                   0                   0                   0                   0                   0

  Columns 26 through 30

                   0                   0                   0                   0                   0

  Columns 31 through 35

                   0                   0                   0                   0                   0

  Columns 36 through 40

                   0                   0                   0                   0                   0

  Columns 41 through 45

                   0                   0                   0                   0                   0

  Columns 46 through 50

                   0                   0                   0                   0                   0

  Columns 51 through 55

                   0                   0                   0                   0                   0

  Columns 56 through 60

                   0                   0                   0                   0                   0

  Column 61

                   0


inner_code_BER =

  Columns 1 through 5

   0.141500879323390   0.138175148203252   0.134853729924419   0.131538204629457   0.128230195980865

  Columns 6 through 10

   0.124931368648881   0.121643425202649   0.118368102385146   0.115107166774748   0.111862409864375

  Columns 11 through 15

   0.108635642622936   0.105428689642400   0.102243383016212   0.099081556139248                   0

  Columns 16 through 20

                   0                   0                   0                   0                   0

  Columns 21 through 25

                   0                   0                   0                   0                   0

  Columns 26 through 30

                   0                   0                   0                   0                   0

  Columns 31 through 35

                   0                   0                   0                   0                   0

  Columns 36 through 40

                   0                   0                   0                   0                   0

  Columns 41 through 45

                   0                   0                   0                   0                   0

  Columns 46 through 50

                   0                   0                   0                   0                   0

  Columns 51 through 55

                   0                   0                   0                   0                   0

  Columns 56 through 60

                   0                   0                   0                   0                   0

  Column 61

                   0


outer_code_BER =

  Columns 1 through 5

   0.141500879323390   0.138175148203252   0.134853729924419   0.131538204629458   0.128230195980865

  Columns 6 through 10

   0.124931368648882   0.121643425202650   0.118368102385146   0.115107166774749   0.111862409864376

  Columns 11 through 15

   0.108635642622937   0.105428689642400   0.102243383016213   0.099081556139249                   0

  Columns 16 through 20

                   0                   0                   0                   0                   0

  Columns 21 through 25

                   0                   0                   0                   0                   0

  Columns 26 through 30

                   0                   0                   0                   0                   0

  Columns 31 through 35

                   0                   0                   0                   0                   0

  Columns 36 through 40

                   0                   0                   0                   0                   0

  Columns 41 through 45

                   0                   0                   0                   0                   0

  Columns 46 through 50

                   0                   0                   0                   0                   0

  Columns 51 through 55

                   0                   0                   0                   0                   0

  Columns 56 through 60

                   0                   0                   0                   0                   0

  Column 61

                   0


inner_code_BER =

  Columns 1 through 5

   0.141500879323390   0.138175148203252   0.134853729924419   0.131538204629457   0.128230195980865

  Columns 6 through 10

   0.124931368648881   0.121643425202649   0.118368102385146   0.115107166774748   0.111862409864375

  Columns 11 through 15

   0.108635642622936   0.105428689642400   0.102243383016212   0.099081556139248   0.095945037663722

  Columns 16 through 20

                   0                   0                   0                   0                   0

  Columns 21 through 25

                   0                   0                   0                   0                   0

  Columns 26 through 30

                   0                   0                   0                   0                   0

  Columns 31 through 35

                   0                   0                   0                   0                   0

  Columns 36 through 40

                   0                   0                   0                   0                   0

  Columns 41 through 45

                   0                   0                   0                   0                   0

  Columns 46 through 50

                   0                   0                   0                   0                   0

  Columns 51 through 55

                   0                   0                   0                   0                   0

  Columns 56 through 60

                   0                   0                   0                   0                   0

  Column 61

                   0


outer_code_BER =

  Columns 1 through 5

   0.141500879323390   0.138175148203252   0.134853729924419   0.131538204629458   0.128230195980865

  Columns 6 through 10

   0.124931368648882   0.121643425202650   0.118368102385146   0.115107166774749   0.111862409864376

  Columns 11 through 15

   0.108635642622937   0.105428689642400   0.102243383016213   0.099081556139249   0.095945037663722

  Columns 16 through 20

                   0                   0                   0                   0                   0

  Columns 21 through 25

                   0                   0                   0                   0                   0

  Columns 26 through 30

                   0                   0                   0                   0                   0

  Columns 31 through 35

                   0                   0                   0                   0                   0

  Columns 36 through 40

                   0                   0                   0                   0                   0

  Columns 41 through 45

                   0                   0                   0                   0                   0

  Columns 46 through 50

                   0                   0                   0                   0                   0

  Columns 51 through 55

                   0                   0                   0                   0                   0

  Columns 56 through 60

                   0                   0                   0                   0                   0

  Column 61

                   0


inner_code_BER =

  Columns 1 through 5

   0.141500879323390   0.138175148203252   0.134853729924419   0.131538204629457   0.128230195980865

  Columns 6 through 10

   0.124931368648881   0.121643425202649   0.118368102385146   0.115107166774748   0.111862409864375

  Columns 11 through 15

   0.108635642622936   0.105428689642400   0.102243383016212   0.099081556139248   0.095945037663722

  Columns 16 through 20

   0.092835645886779                   0                   0                   0                   0

  Columns 21 through 25

                   0                   0                   0                   0                   0

  Columns 26 through 30

                   0                   0                   0                   0                   0

  Columns 31 through 35

                   0                   0                   0                   0                   0

  Columns 36 through 40

                   0                   0                   0                   0                   0

  Columns 41 through 45

                   0                   0                   0                   0                   0

  Columns 46 through 50

                   0                   0                   0                   0                   0

  Columns 51 through 55

                   0                   0                   0                   0                   0

  Columns 56 through 60

                   0                   0                   0                   0                   0

  Column 61

                   0


outer_code_BER =

  Columns 1 through 5

   0.141500879323390   0.138175148203252   0.134853729924419   0.131538204629458   0.128230195980865

  Columns 6 through 10

   0.124931368648882   0.121643425202650   0.118368102385146   0.115107166774749   0.111862409864376

  Columns 11 through 15

   0.108635642622937   0.105428689642400   0.102243383016213   0.099081556139249   0.095945037663722

  Columns 16 through 20

   0.092835645886779                   0                   0                   0                   0

  Columns 21 through 25

                   0                   0                   0                   0                   0

  Columns 26 through 30

                   0                   0                   0                   0                   0

  Columns 31 through 35

                   0                   0                   0                   0                   0

  Columns 36 through 40

                   0                   0                   0                   0                   0

  Columns 41 through 45

                   0                   0                   0                   0                   0

  Columns 46 through 50

                   0                   0                   0                   0                   0

  Columns 51 through 55

                   0                   0                   0                   0                   0

  Columns 56 through 60

                   0                   0                   0                   0                   0

  Column 61

                   0


inner_code_BER =

  Columns 1 through 5

   0.141500879323390   0.138175148203252   0.134853729924419   0.131538204629457   0.128230195980865

  Columns 6 through 10

   0.124931368648881   0.121643425202649   0.118368102385146   0.115107166774748   0.111862409864375

  Columns 11 through 15

   0.108635642622936   0.105428689642400   0.102243383016212   0.099081556139248   0.095945037663722

  Columns 16 through 20

   0.092835645886779   0.089755183880390                   0                   0                   0

  Columns 21 through 25

                   0                   0                   0                   0                   0

  Columns 26 through 30

                   0                   0                   0                   0                   0

  Columns 31 through 35

                   0                   0                   0                   0                   0

  Columns 36 through 40

                   0                   0                   0                   0                   0

  Columns 41 through 45

                   0                   0                   0                   0                   0

  Columns 46 through 50

                   0                   0                   0                   0                   0

  Columns 51 through 55

                   0                   0                   0                   0                   0

  Columns 56 through 60

                   0                   0                   0                   0                   0

  Column 61

                   0


outer_code_BER =

  Columns 1 through 5

   0.141500879323390   0.138175148203252   0.134853729924419   0.131538204629458   0.128230195980865

  Columns 6 through 10

   0.124931368648882   0.121643425202650   0.118368102385146   0.115107166774749   0.111862409864376

  Columns 11 through 15

   0.108635642622937   0.105428689642400   0.102243383016213   0.099081556139249   0.095945037663722

  Columns 16 through 20

   0.092835645886779   0.089755183880391                   0                   0                   0

  Columns 21 through 25

                   0                   0                   0                   0                   0

  Columns 26 through 30

                   0                   0                   0                   0                   0

  Columns 31 through 35

                   0                   0                   0                   0                   0

  Columns 36 through 40

                   0                   0                   0                   0                   0

  Columns 41 through 45

                   0                   0                   0                   0                   0

  Columns 46 through 50

                   0                   0                   0                   0                   0

  Columns 51 through 55

                   0                   0                   0                   0                   0

  Columns 56 through 60

                   0                   0                   0                   0                   0

  Column 61

                   0


inner_code_BER =

  Columns 1 through 5

   0.141500879323390   0.138175148203252   0.134853729924419   0.131538204629457   0.128230195980865

  Columns 6 through 10

   0.124931368648881   0.121643425202649   0.118368102385146   0.115107166774748   0.111862409864375

  Columns 11 through 15

   0.108635642622936   0.105428689642400   0.102243383016212   0.099081556139248   0.095945037663722

  Columns 16 through 20

   0.092835645886779   0.089755183880390   0.086705435699124                   0                   0

  Columns 21 through 25

                   0                   0                   0                   0                   0

  Columns 26 through 30

                   0                   0                   0                   0                   0

  Columns 31 through 35

                   0                   0                   0                   0                   0

  Columns 36 through 40

                   0                   0                   0                   0                   0

  Columns 41 through 45

                   0                   0                   0                   0                   0

  Columns 46 through 50

                   0                   0                   0                   0                   0

  Columns 51 through 55

                   0                   0                   0                   0                   0

  Columns 56 through 60

                   0                   0                   0                   0                   0

  Column 61

                   0


outer_code_BER =

  Columns 1 through 5

   0.141500879323390   0.138175148203252   0.134853729924419   0.131538204629458   0.128230195980865

  Columns 6 through 10

   0.124931368648882   0.121643425202650   0.118368102385146   0.115107166774749   0.111862409864376

  Columns 11 through 15

   0.108635642622937   0.105428689642400   0.102243383016213   0.099081556139249   0.095945037663722

  Columns 16 through 20

   0.092835645886779   0.089755183880391   0.086705435699124                   0                   0

  Columns 21 through 25

                   0                   0                   0                   0                   0

  Columns 26 through 30

                   0                   0                   0                   0                   0

  Columns 31 through 35

                   0                   0                   0                   0                   0

  Columns 36 through 40

                   0                   0                   0                   0                   0

  Columns 41 through 45

                   0                   0                   0                   0                   0

  Columns 46 through 50

                   0                   0                   0                   0                   0

  Columns 51 through 55

                   0                   0                   0                   0                   0

  Columns 56 through 60

                   0                   0                   0                   0                   0

  Column 61

                   0


inner_code_BER =

  Columns 1 through 5

   0.141500879323390   0.138175148203252   0.134853729924419   0.131538204629457   0.128230195980865

  Columns 6 through 10

   0.124931368648881   0.121643425202649   0.118368102385146   0.115107166774748   0.111862409864375

  Columns 11 through 15

   0.108635642622936   0.105428689642400   0.102243383016212   0.099081556139248   0.095945037663722

  Columns 16 through 20

   0.092835645886779   0.089755183880390   0.086705435699124   0.083688164011978                   0

  Columns 21 through 25

                   0                   0                   0                   0                   0

  Columns 26 through 30

                   0                   0                   0                   0                   0

  Columns 31 through 35

                   0                   0                   0                   0                   0

  Columns 36 through 40

                   0                   0                   0                   0                   0

  Columns 41 through 45

                   0                   0                   0                   0                   0

  Columns 46 through 50

                   0                   0                   0                   0                   0

  Columns 51 through 55

                   0                   0                   0                   0                   0

  Columns 56 through 60

                   0                   0                   0                   0                   0

  Column 61

                   0


outer_code_BER =

  Columns 1 through 5

   0.141500879323390   0.138175148203252   0.134853729924419   0.131538204629458   0.128230195980865

  Columns 6 through 10

   0.124931368648882   0.121643425202650   0.118368102385146   0.115107166774749   0.111862409864376

  Columns 11 through 15

   0.108635642622937   0.105428689642400   0.102243383016213   0.099081556139249   0.095945037663722

  Columns 16 through 20

   0.092835645886779   0.089755183880391   0.086705435699124   0.083688164011980                   0

  Columns 21 through 25

                   0                   0                   0                   0                   0

  Columns 26 through 30

                   0                   0                   0                   0                   0

  Columns 31 through 35

                   0                   0                   0                   0                   0

  Columns 36 through 40

                   0                   0                   0                   0                   0

  Columns 41 through 45

                   0                   0                   0                   0                   0

  Columns 46 through 50

                   0                   0                   0                   0                   0

  Columns 51 through 55

                   0                   0                   0                   0                   0

  Columns 56 through 60

                   0                   0                   0                   0                   0

  Column 61

                   0


inner_code_BER =

  Columns 1 through 5

   0.141500879323390   0.138175148203252   0.134853729924419   0.131538204629457   0.128230195980865

  Columns 6 through 10

   0.124931368648881   0.121643425202649   0.118368102385146   0.115107166774748   0.111862409864375

  Columns 11 through 15

   0.108635642622936   0.105428689642400   0.102243383016212   0.099081556139248   0.095945037663722

  Columns 16 through 20

   0.092835645886779   0.089755183880390   0.086705435699124   0.083688164011978   0.080705109496172

  Columns 21 through 25

                   0                   0                   0                   0                   0

  Columns 26 through 30

                   0                   0                   0                   0                   0

  Columns 31 through 35

                   0                   0                   0                   0                   0

  Columns 36 through 40

                   0                   0                   0                   0                   0

  Columns 41 through 45

                   0                   0                   0                   0                   0

  Columns 46 through 50

                   0                   0                   0                   0                   0

  Columns 51 through 55

                   0                   0                   0                   0                   0

  Columns 56 through 60

                   0                   0                   0                   0                   0

  Column 61

                   0


outer_code_BER =

  Columns 1 through 5

   0.141500879323390   0.138175148203252   0.134853729924419   0.131538204629458   0.128230195980865

  Columns 6 through 10

   0.124931368648882   0.121643425202650   0.118368102385146   0.115107166774749   0.111862409864376

  Columns 11 through 15

   0.108635642622937   0.105428689642400   0.102243383016213   0.099081556139249   0.095945037663722

  Columns 16 through 20

   0.092835645886779   0.089755183880391   0.086705435699124   0.083688164011980   0.080705109496172

  Columns 21 through 25

                   0                   0                   0                   0                   0

  Columns 26 through 30

                   0                   0                   0                   0                   0

  Columns 31 through 35

                   0                   0                   0                   0                   0

  Columns 36 through 40

                   0                   0                   0                   0                   0

  Columns 41 through 45

                   0                   0                   0                   0                   0

  Columns 46 through 50

                   0                   0                   0                   0                   0

  Columns 51 through 55

                   0                   0                   0                   0                   0

  Columns 56 through 60

                   0                   0                   0                   0                   0

  Column 61

                   0


inner_code_BER =

  Columns 1 through 5

   0.141500879323390   0.138175148203252   0.134853729924419   0.131538204629457   0.128230195980865

  Columns 6 through 10

   0.124931368648881   0.121643425202649   0.118368102385146   0.115107166774748   0.111862409864375

  Columns 11 through 15

   0.108635642622936   0.105428689642400   0.102243383016212   0.099081556139248   0.095945037663722

  Columns 16 through 20

   0.092835645886779   0.089755183880390   0.086705435699124   0.083688164011978   0.080705109496172

  Columns 21 through 25

   0.077757992298171                   0                   0                   0                   0

  Columns 26 through 30

                   0                   0                   0                   0                   0

  Columns 31 through 35

                   0                   0                   0                   0                   0

  Columns 36 through 40

                   0                   0                   0                   0                   0

  Columns 41 through 45

                   0                   0                   0                   0                   0

  Columns 46 through 50

                   0                   0                   0                   0                   0

  Columns 51 through 55

                   0                   0                   0                   0                   0

  Columns 56 through 60

                   0                   0                   0                   0                   0

  Column 61

                   0


outer_code_BER =

  Columns 1 through 5

   0.141500879323390   0.138175148203252   0.134853729924419   0.131538204629458   0.128230195980865

  Columns 6 through 10

   0.124931368648882   0.121643425202650   0.118368102385146   0.115107166774749   0.111862409864376

  Columns 11 through 15

   0.108635642622937   0.105428689642400   0.102243383016213   0.099081556139249   0.095945037663722

  Columns 16 through 20

   0.092835645886779   0.089755183880391   0.086705435699124   0.083688164011980   0.080705109496172

  Columns 21 through 25

   0.077757992298172                   0                   0                   0                   0

  Columns 26 through 30

                   0                   0                   0                   0                   0

  Columns 31 through 35

                   0                   0                   0                   0                   0

  Columns 36 through 40

                   0                   0                   0                   0                   0

  Columns 41 through 45

                   0                   0                   0                   0                   0

  Columns 46 through 50

                   0                   0                   0                   0                   0

  Columns 51 through 55

                   0                   0                   0                   0                   0

  Columns 56 through 60

                   0                   0                   0                   0                   0

  Column 61

                   0


inner_code_BER =

  Columns 1 through 5

   0.141500879323390   0.138175148203252   0.134853729924419   0.131538204629457   0.128230195980865

  Columns 6 through 10

   0.124931368648881   0.121643425202649   0.118368102385146   0.115107166774748   0.111862409864375

  Columns 11 through 15

   0.108635642622936   0.105428689642400   0.102243383016212   0.099081556139248   0.095945037663722

  Columns 16 through 20

   0.092835645886779   0.089755183880390   0.086705435699124   0.083688164011978   0.080705109496172

  Columns 21 through 25

   0.077757992298171   0.074848515804224                   0                   0                   0

  Columns 26 through 30

                   0                   0                   0                   0                   0

  Columns 31 through 35

                   0                   0                   0                   0                   0

  Columns 36 through 40

                   0                   0                   0                   0                   0

  Columns 41 through 45

                   0                   0                   0                   0                   0

  Columns 46 through 50

                   0                   0                   0                   0                   0

  Columns 51 through 55

                   0                   0                   0                   0                   0

  Columns 56 through 60

                   0                   0                   0                   0                   0

  Column 61

                   0


outer_code_BER =

  Columns 1 through 5

   0.141500879323390   0.138175148203252   0.134853729924419   0.131538204629458   0.128230195980865

  Columns 6 through 10

   0.124931368648882   0.121643425202650   0.118368102385146   0.115107166774749   0.111862409864376

  Columns 11 through 15

   0.108635642622937   0.105428689642400   0.102243383016213   0.099081556139249   0.095945037663722

  Columns 16 through 20

   0.092835645886779   0.089755183880391   0.086705435699124   0.083688164011980   0.080705109496172

  Columns 21 through 25

   0.077757992298172   0.074848515804228                   0                   0                   0

  Columns 26 through 30

                   0                   0                   0                   0                   0

  Columns 31 through 35

                   0                   0                   0                   0                   0

  Columns 36 through 40

                   0                   0                   0                   0                   0

  Columns 41 through 45

                   0                   0                   0                   0                   0

  Columns 46 through 50

                   0                   0                   0                   0                   0

  Columns 51 through 55

                   0                   0                   0                   0                   0

  Columns 56 through 60

                   0                   0                   0                   0                   0

  Column 61

                   0


inner_code_BER =

  Columns 1 through 5

   0.141500879323390   0.138175148203252   0.134853729924419   0.131538204629457   0.128230195980865

  Columns 6 through 10

   0.124931368648881   0.121643425202649   0.118368102385146   0.115107166774748   0.111862409864375

  Columns 11 through 15

   0.108635642622936   0.105428689642400   0.102243383016212   0.099081556139248   0.095945037663722

  Columns 16 through 20

   0.092835645886779   0.089755183880390   0.086705435699124   0.083688164011978   0.080705109496172

  Columns 21 through 25

   0.077757992298171   0.074848515804224   0.071978372861975                   0                   0

  Columns 26 through 30

                   0                   0                   0                   0                   0

  Columns 31 through 35

                   0                   0                   0                   0                   0

  Columns 36 through 40

                   0                   0                   0                   0                   0

  Columns 41 through 45

                   0                   0                   0                   0                   0

  Columns 46 through 50

                   0                   0                   0                   0                   0

  Columns 51 through 55

                   0                   0                   0                   0                   0

  Columns 56 through 60

                   0                   0                   0                   0                   0

  Column 61

                   0


outer_code_BER =

  Columns 1 through 5

   0.141500879323390   0.138175148203252   0.134853729924419   0.131538204629458   0.128230195980865

  Columns 6 through 10

   0.124931368648882   0.121643425202650   0.118368102385146   0.115107166774749   0.111862409864376

  Columns 11 through 15

   0.108635642622937   0.105428689642400   0.102243383016213   0.099081556139249   0.095945037663722

  Columns 16 through 20

   0.092835645886779   0.089755183880391   0.086705435699124   0.083688164011980   0.080705109496172

  Columns 21 through 25

   0.077757992298172   0.074848515804228   0.071978372861988                   0                   0

  Columns 26 through 30

                   0                   0                   0                   0                   0

  Columns 31 through 35

                   0                   0                   0                   0                   0

  Columns 36 through 40

                   0                   0                   0                   0                   0

  Columns 41 through 45

                   0                   0                   0                   0                   0

  Columns 46 through 50

                   0                   0                   0                   0                   0

  Columns 51 through 55

                   0                   0                   0                   0                   0

  Columns 56 through 60

                   0                   0                   0                   0                   0

  Column 61

                   0


inner_code_BER =

  Columns 1 through 5

   0.141500879323390   0.138175148203252   0.134853729924419   0.131538204629457   0.128230195980865

  Columns 6 through 10

   0.124931368648881   0.121643425202649   0.118368102385146   0.115107166774748   0.111862409864375

  Columns 11 through 15

   0.108635642622936   0.105428689642400   0.102243383016212   0.099081556139248   0.095945037663722

  Columns 16 through 20

   0.092835645886779   0.089755183880390   0.086705435699124   0.083688164011978   0.080705109496172

  Columns 21 through 25

   0.077757992298171   0.074848515804224   0.071978372861975   0.069149254447826                   0

  Columns 26 through 30

                   0                   0                   0                   0                   0

  Columns 31 through 35

                   0                   0                   0                   0                   0

  Columns 36 through 40

                   0                   0                   0                   0                   0

  Columns 41 through 45

                   0                   0                   0                   0                   0

  Columns 46 through 50

                   0                   0                   0                   0                   0

  Columns 51 through 55

                   0                   0                   0                   0                   0

  Columns 56 through 60

                   0                   0                   0                   0                   0

  Column 61

                   0


outer_code_BER =

  Columns 1 through 5

   0.141500879323390   0.138175148203252   0.134853729924419   0.131538204629458   0.128230195980865

  Columns 6 through 10

   0.124931368648882   0.121643425202650   0.118368102385146   0.115107166774749   0.111862409864376

  Columns 11 through 15

   0.108635642622937   0.105428689642400   0.102243383016213   0.099081556139249   0.095945037663722

  Columns 16 through 20

   0.092835645886779   0.089755183880391   0.086705435699124   0.083688164011980   0.080705109496172

  Columns 21 through 25

   0.077757992298172   0.074848515804228   0.071978372861988   0.069149254447863                   0

  Columns 26 through 30

                   0                   0                   0                   0                   0

  Columns 31 through 35

                   0                   0                   0                   0                   0

  Columns 36 through 40

                   0                   0                   0                   0                   0

  Columns 41 through 45

                   0                   0                   0                   0                   0

  Columns 46 through 50

                   0                   0                   0                   0                   0

  Columns 51 through 55

                   0                   0                   0                   0                   0

  Columns 56 through 60

                   0                   0                   0                   0                   0

  Column 61

                   0


inner_code_BER =

  Columns 1 through 5

   0.141500879323390   0.138175148203252   0.134853729924419   0.131538204629457   0.128230195980865

  Columns 6 through 10

   0.124931368648881   0.121643425202649   0.118368102385146   0.115107166774748   0.111862409864375

  Columns 11 through 15

   0.108635642622936   0.105428689642400   0.102243383016212   0.099081556139248   0.095945037663722

  Columns 16 through 20

   0.092835645886779   0.089755183880390   0.086705435699124   0.083688164011978   0.080705109496172

  Columns 21 through 25

   0.077757992298171   0.074848515804224   0.071978372861975   0.069149254447826   0.066362860572218

  Columns 26 through 30

                   0                   0                   0                   0                   0

  Columns 31 through 35

                   0                   0                   0                   0                   0

  Columns 36 through 40

                   0                   0                   0                   0                   0

  Columns 41 through 45

                   0                   0                   0                   0                   0

  Columns 46 through 50

                   0                   0                   0                   0                   0

  Columns 51 through 55

                   0                   0                   0                   0                   0

  Columns 56 through 60

                   0                   0                   0                   0                   0

  Column 61

                   0


outer_code_BER =

  Columns 1 through 5

   0.141500879323390   0.138175148203252   0.134853729924419   0.131538204629458   0.128230195980865

  Columns 6 through 10

   0.124931368648882   0.121643425202650   0.118368102385146   0.115107166774749   0.111862409864376

  Columns 11 through 15

   0.108635642622937   0.105428689642400   0.102243383016213   0.099081556139249   0.095945037663722

  Columns 16 through 20

   0.092835645886779   0.089755183880391   0.086705435699124   0.083688164011980   0.080705109496172

  Columns 21 through 25

   0.077757992298172   0.074848515804228   0.071978372861988   0.069149254447863   0.066362860572328

  Columns 26 through 30

                   0                   0                   0                   0                   0

  Columns 31 through 35

                   0                   0                   0                   0                   0

  Columns 36 through 40

                   0                   0                   0                   0                   0

  Columns 41 through 45

                   0                   0                   0                   0                   0

  Columns 46 through 50

                   0                   0                   0                   0                   0

  Columns 51 through 55

                   0                   0                   0                   0                   0

  Columns 56 through 60

                   0                   0                   0                   0                   0

  Column 61

                   0


inner_code_BER =

  Columns 1 through 5

   0.141500879323390   0.138175148203252   0.134853729924419   0.131538204629457   0.128230195980865

  Columns 6 through 10

   0.124931368648881   0.121643425202649   0.118368102385146   0.115107166774748   0.111862409864375

  Columns 11 through 15

   0.108635642622936   0.105428689642400   0.102243383016212   0.099081556139248   0.095945037663722

  Columns 16 through 20

   0.092835645886779   0.089755183880390   0.086705435699124   0.083688164011978   0.080705109496172

  Columns 21 through 25

   0.077757992298171   0.074848515804224   0.071978372861975   0.069149254447826   0.066362860572218

  Columns 26 through 30

   0.063620912947282                   0                   0                   0                   0

  Columns 31 through 35

                   0                   0                   0                   0                   0

  Columns 36 through 40

                   0                   0                   0                   0                   0

  Columns 41 through 45

                   0                   0                   0                   0                   0

  Columns 46 through 50

                   0                   0                   0                   0                   0

  Columns 51 through 55

                   0                   0                   0                   0                   0

  Columns 56 through 60

                   0                   0                   0                   0                   0

  Column 61

                   0


outer_code_BER =

  Columns 1 through 5

   0.141500879323390   0.138175148203252   0.134853729924419   0.131538204629458   0.128230195980865

  Columns 6 through 10

   0.124931368648882   0.121643425202650   0.118368102385146   0.115107166774749   0.111862409864376

  Columns 11 through 15

   0.108635642622937   0.105428689642400   0.102243383016213   0.099081556139249   0.095945037663722

  Columns 16 through 20

   0.092835645886779   0.089755183880391   0.086705435699124   0.083688164011980   0.080705109496172

  Columns 21 through 25

   0.077757992298172   0.074848515804228   0.071978372861988   0.069149254447863   0.066362860572328

  Columns 26 through 30

   0.063620912947592                   0                   0                   0                   0

  Columns 31 through 35

                   0                   0                   0                   0                   0

  Columns 36 through 40

                   0                   0                   0                   0                   0

  Columns 41 through 45

                   0                   0                   0                   0                   0

  Columns 46 through 50

                   0                   0                   0                   0                   0

  Columns 51 through 55

                   0                   0                   0                   0                   0

  Columns 56 through 60

                   0                   0                   0                   0                   0

  Column 61

                   0


inner_code_BER =

  Columns 1 through 5

   0.141500879323390   0.138175148203252   0.134853729924419   0.131538204629457   0.128230195980865

  Columns 6 through 10

   0.124931368648881   0.121643425202649   0.118368102385146   0.115107166774748   0.111862409864375

  Columns 11 through 15

   0.108635642622936   0.105428689642400   0.102243383016212   0.099081556139248   0.095945037663722

  Columns 16 through 20

   0.092835645886779   0.089755183880390   0.086705435699124   0.083688164011978   0.080705109496172

  Columns 21 through 25

   0.077757992298171   0.074848515804224   0.071978372861975   0.069149254447826   0.066362860572218

  Columns 26 through 30

   0.063620912947282   0.060925168601093                   0                   0                   0

  Columns 31 through 35

                   0                   0                   0                   0                   0

  Columns 36 through 40

                   0                   0                   0                   0                   0

  Columns 41 through 45

                   0                   0                   0                   0                   0

  Columns 46 through 50

                   0                   0                   0                   0                   0

  Columns 51 through 55

                   0                   0                   0                   0                   0

  Columns 56 through 60

                   0                   0                   0                   0                   0

  Column 61

                   0


outer_code_BER =

  Columns 1 through 5

   0.141500879323390   0.138175148203252   0.134853729924419   0.131538204629458   0.128230195980865

  Columns 6 through 10

   0.124931368648882   0.121643425202650   0.118368102385146   0.115107166774749   0.111862409864376

  Columns 11 through 15

   0.108635642622937   0.105428689642400   0.102243383016213   0.099081556139249   0.095945037663722

  Columns 16 through 20

   0.092835645886779   0.089755183880391   0.086705435699124   0.083688164011980   0.080705109496172

  Columns 21 through 25

   0.077757992298172   0.074848515804228   0.071978372861988   0.069149254447863   0.066362860572328

  Columns 26 through 30

   0.063620912947592   0.060925168601948                   0                   0                   0

  Columns 31 through 35

                   0                   0                   0                   0                   0

  Columns 36 through 40

                   0                   0                   0                   0                   0

  Columns 41 through 45

                   0                   0                   0                   0                   0

  Columns 46 through 50

                   0                   0                   0                   0                   0

  Columns 51 through 55

                   0                   0                   0                   0                   0

  Columns 56 through 60

                   0                   0                   0                   0                   0

  Column 61

                   0


inner_code_BER =

  Columns 1 through 5

   0.141500879323390   0.138175148203252   0.134853729924419   0.131538204629457   0.128230195980865

  Columns 6 through 10

   0.124931368648881   0.121643425202649   0.118368102385146   0.115107166774748   0.111862409864375

  Columns 11 through 15

   0.108635642622936   0.105428689642400   0.102243383016212   0.099081556139248   0.095945037663722

  Columns 16 through 20

   0.092835645886779   0.089755183880390   0.086705435699124   0.083688164011978   0.080705109496172

  Columns 21 through 25

   0.077757992298171   0.074848515804224   0.071978372861975   0.069149254447826   0.066362860572218

  Columns 26 through 30

   0.063620912947282   0.060925168601093   0.058277433209333                   0                   0

  Columns 31 through 35

                   0                   0                   0                   0                   0

  Columns 36 through 40

                   0                   0                   0                   0                   0

  Columns 41 through 45

                   0                   0                   0                   0                   0

  Columns 46 through 50

                   0                   0                   0                   0                   0

  Columns 51 through 55

                   0                   0                   0                   0                   0

  Columns 56 through 60

                   0                   0                   0                   0                   0

  Column 61

                   0


outer_code_BER =

  Columns 1 through 5

   0.141500879323390   0.138175148203252   0.134853729924419   0.131538204629458   0.128230195980865

  Columns 6 through 10

   0.124931368648882   0.121643425202650   0.118368102385146   0.115107166774749   0.111862409864376

  Columns 11 through 15

   0.108635642622937   0.105428689642400   0.102243383016213   0.099081556139249   0.095945037663722

  Columns 16 through 20

   0.092835645886779   0.089755183880391   0.086705435699124   0.083688164011980   0.080705109496172

  Columns 21 through 25

   0.077757992298172   0.074848515804228   0.071978372861988   0.069149254447863   0.066362860572328

  Columns 26 through 30

   0.063620912947592   0.060925168601948   0.058277433211614                   0                   0

  Columns 31 through 35

                   0                   0                   0                   0                   0

  Columns 36 through 40

                   0                   0                   0                   0                   0

  Columns 41 through 45

                   0                   0                   0                   0                   0

  Columns 46 through 50

                   0                   0                   0                   0                   0

  Columns 51 through 55

                   0                   0                   0                   0                   0

  Columns 56 through 60

                   0                   0                   0                   0                   0

  Column 61

                   0


inner_code_BER =

  Columns 1 through 5

   0.141500879323390   0.138175148203252   0.134853729924419   0.131538204629457   0.128230195980865

  Columns 6 through 10

   0.124931368648881   0.121643425202649   0.118368102385146   0.115107166774748   0.111862409864375

  Columns 11 through 15

   0.108635642622936   0.105428689642400   0.102243383016212   0.099081556139248   0.095945037663722

  Columns 16 through 20

   0.092835645886779   0.089755183880390   0.086705435699124   0.083688164011978   0.080705109496172

  Columns 21 through 25

   0.077757992298171   0.074848515804224   0.071978372861975   0.069149254447826   0.066362860572218

  Columns 26 through 30

   0.063620912947282   0.060925168601093   0.058277433209333   0.055679572441115                   0

  Columns 31 through 35

                   0                   0                   0                   0                   0

  Columns 36 through 40

                   0                   0                   0                   0                   0

  Columns 41 through 45

                   0                   0                   0                   0                   0

  Columns 46 through 50

                   0                   0                   0                   0                   0

  Columns 51 through 55

                   0                   0                   0                   0                   0

  Columns 56 through 60

                   0                   0                   0                   0                   0

  Column 61

                   0


outer_code_BER =

  Columns 1 through 5

   0.141500879323390   0.138175148203252   0.134853729924419   0.131538204629458   0.128230195980865

  Columns 6 through 10

   0.124931368648882   0.121643425202650   0.118368102385146   0.115107166774749   0.111862409864376

  Columns 11 through 15

   0.108635642622937   0.105428689642400   0.102243383016213   0.099081556139249   0.095945037663722

  Columns 16 through 20

   0.092835645886779   0.089755183880391   0.086705435699124   0.083688164011980   0.080705109496172

  Columns 21 through 25

   0.077757992298172   0.074848515804228   0.071978372861988   0.069149254447863   0.066362860572328

  Columns 26 through 30

   0.063620912947592   0.060925168601948   0.058277433211614   0.055679572447018                   0

  Columns 31 through 35

                   0                   0                   0                   0                   0

  Columns 36 through 40

                   0                   0                   0                   0                   0

  Columns 41 through 45

                   0                   0                   0                   0                   0

  Columns 46 through 50

                   0                   0                   0                   0                   0

  Columns 51 through 55

                   0                   0                   0                   0                   0

  Columns 56 through 60

                   0                   0                   0                   0                   0

  Column 61

                   0


inner_code_BER =

  Columns 1 through 5

   0.141500879323390   0.138175148203252   0.134853729924419   0.131538204629457   0.128230195980865

  Columns 6 through 10

   0.124931368648881   0.121643425202649   0.118368102385146   0.115107166774748   0.111862409864375

  Columns 11 through 15

   0.108635642622936   0.105428689642400   0.102243383016212   0.099081556139248   0.095945037663722

  Columns 16 through 20

   0.092835645886779   0.089755183880390   0.086705435699124   0.083688164011978   0.080705109496172

  Columns 21 through 25

   0.077757992298171   0.074848515804224   0.071978372861975   0.069149254447826   0.066362860572218

  Columns 26 through 30

   0.063620912947282   0.060925168601093   0.058277433209333   0.055679572441115   0.053133519115760

  Columns 31 through 35

                   0                   0                   0                   0                   0

  Columns 36 through 40

                   0                   0                   0                   0                   0

  Columns 41 through 45

                   0                   0                   0                   0                   0

  Columns 46 through 50

                   0                   0                   0                   0                   0

  Columns 51 through 55

                   0                   0                   0                   0                   0

  Columns 56 through 60

                   0                   0                   0                   0                   0

  Column 61

                   0


outer_code_BER =

  Columns 1 through 5

   0.141500879323390   0.138175148203252   0.134853729924419   0.131538204629458   0.128230195980865

  Columns 6 through 10

   0.124931368648882   0.121643425202650   0.118368102385146   0.115107166774749   0.111862409864376

  Columns 11 through 15

   0.108635642622937   0.105428689642400   0.102243383016213   0.099081556139249   0.095945037663722

  Columns 16 through 20

   0.092835645886779   0.089755183880391   0.086705435699124   0.083688164011980   0.080705109496172

  Columns 21 through 25

   0.077757992298172   0.074848515804228   0.071978372861988   0.069149254447863   0.066362860572328

  Columns 26 through 30

   0.063620912947592   0.060925168601948   0.058277433211614   0.055679572447018   0.053133519130552

  Columns 31 through 35

                   0                   0                   0                   0                   0

  Columns 36 through 40

                   0                   0                   0                   0                   0

  Columns 41 through 45

                   0                   0                   0                   0                   0

  Columns 46 through 50

                   0                   0                   0                   0                   0

  Columns 51 through 55

                   0                   0                   0                   0                   0

  Columns 56 through 60

                   0                   0                   0                   0                   0

  Column 61

                   0


inner_code_BER =

  Columns 1 through 5

   0.141500879323390   0.138175148203252   0.134853729924419   0.131538204629457   0.128230195980865

  Columns 6 through 10

   0.124931368648881   0.121643425202649   0.118368102385146   0.115107166774748   0.111862409864375

  Columns 11 through 15

   0.108635642622936   0.105428689642400   0.102243383016212   0.099081556139248   0.095945037663722

  Columns 16 through 20

   0.092835645886779   0.089755183880390   0.086705435699124   0.083688164011978   0.080705109496172

  Columns 21 through 25

   0.077757992298171   0.074848515804224   0.071978372861975   0.069149254447826   0.066362860572218

  Columns 26 through 30

   0.063620912947282   0.060925168601093   0.058277433209333   0.055679572441115   0.053133519115760

  Columns 31 through 35

   0.050641273509265                   0                   0                   0                   0

  Columns 36 through 40

                   0                   0                   0                   0                   0

  Columns 41 through 45

                   0                   0                   0                   0                   0

  Columns 46 through 50

                   0                   0                   0                   0                   0

  Columns 51 through 55

                   0                   0                   0                   0                   0

  Columns 56 through 60

                   0                   0                   0                   0                   0

  Column 61

                   0


outer_code_BER =

  Columns 1 through 5

   0.141500879323390   0.138175148203252   0.134853729924419   0.131538204629458   0.128230195980865

  Columns 6 through 10

   0.124931368648882   0.121643425202650   0.118368102385146   0.115107166774749   0.111862409864376

  Columns 11 through 15

   0.108635642622937   0.105428689642400   0.102243383016213   0.099081556139249   0.095945037663722

  Columns 16 through 20

   0.092835645886779   0.089755183880391   0.086705435699124   0.083688164011980   0.080705109496172

  Columns 21 through 25

   0.077757992298172   0.074848515804228   0.071978372861988   0.069149254447863   0.066362860572328

  Columns 26 through 30

   0.063620912947592   0.060925168601948   0.058277433211614   0.055679572447018   0.053133519130552

  Columns 31 through 35

   0.050641273545164                   0                   0                   0                   0

  Columns 36 through 40

                   0                   0                   0                   0                   0

  Columns 41 through 45

                   0                   0                   0                   0                   0

  Columns 46 through 50

                   0                   0                   0                   0                   0

  Columns 51 through 55

                   0                   0                   0                   0                   0

  Columns 56 through 60

                   0                   0                   0                   0                   0

  Column 61

                   0


inner_code_BER =

  Columns 1 through 5

   0.141500879323390   0.138175148203252   0.134853729924419   0.131538204629457   0.128230195980865

  Columns 6 through 10

   0.124931368648881   0.121643425202649   0.118368102385146   0.115107166774748   0.111862409864375

  Columns 11 through 15

   0.108635642622936   0.105428689642400   0.102243383016212   0.099081556139248   0.095945037663722

  Columns 16 through 20

   0.092835645886779   0.089755183880390   0.086705435699124   0.083688164011978   0.080705109496172

  Columns 21 through 25

   0.077757992298171   0.074848515804224   0.071978372861975   0.069149254447826   0.066362860572218

  Columns 26 through 30

   0.063620912947282   0.060925168601093   0.058277433209333   0.055679572441115   0.053133519115760

  Columns 31 through 35

   0.050641273509265   0.048204893841108                   0                   0                   0

  Columns 36 through 40

                   0                   0                   0                   0                   0

  Columns 41 through 45

                   0                   0                   0                   0                   0

  Columns 46 through 50

                   0                   0                   0                   0                   0

  Columns 51 through 55

                   0                   0                   0                   0                   0

  Columns 56 through 60

                   0                   0                   0                   0                   0

  Column 61

                   0


outer_code_BER =

  Columns 1 through 5

   0.141500879323390   0.138175148203252   0.134853729924419   0.131538204629458   0.128230195980865

  Columns 6 through 10

   0.124931368648882   0.121643425202650   0.118368102385146   0.115107166774749   0.111862409864376

  Columns 11 through 15

   0.108635642622937   0.105428689642400   0.102243383016213   0.099081556139249   0.095945037663722

  Columns 16 through 20

   0.092835645886779   0.089755183880391   0.086705435699124   0.083688164011980   0.080705109496172

  Columns 21 through 25

   0.077757992298172   0.074848515804228   0.071978372861988   0.069149254447863   0.066362860572328

  Columns 26 through 30

   0.063620912947592   0.060925168601948   0.058277433211614   0.055679572447018   0.053133519130552

  Columns 31 through 35

   0.050641273545164   0.048204893925462                   0                   0                   0

  Columns 36 through 40

                   0                   0                   0                   0                   0

  Columns 41 through 45

                   0                   0                   0                   0                   0

  Columns 46 through 50

                   0                   0                   0                   0                   0

  Columns 51 through 55

                   0                   0                   0                   0                   0

  Columns 56 through 60

                   0                   0                   0                   0                   0

  Column 61

                   0


inner_code_BER =

  Columns 1 through 5

   0.141500879323390   0.138175148203252   0.134853729924419   0.131538204629457   0.128230195980865

  Columns 6 through 10

   0.124931368648881   0.121643425202649   0.118368102385146   0.115107166774748   0.111862409864375

  Columns 11 through 15

   0.108635642622936   0.105428689642400   0.102243383016212   0.099081556139248   0.095945037663722

  Columns 16 through 20

   0.092835645886779   0.089755183880390   0.086705435699124   0.083688164011978   0.080705109496172

  Columns 21 through 25

   0.077757992298171   0.074848515804224   0.071978372861975   0.069149254447826   0.066362860572218

  Columns 26 through 30

   0.063620912947282   0.060925168601093   0.058277433209333   0.055679572441115   0.053133519115760

  Columns 31 through 35

   0.050641273509265   0.048204893841108   0.045826473962106                   0                   0

  Columns 36 through 40

                   0                   0                   0                   0                   0

  Columns 41 through 45

                   0                   0                   0                   0                   0

  Columns 46 through 50

                   0                   0                   0                   0                   0

  Columns 51 through 55

                   0                   0                   0                   0                   0

  Columns 56 through 60

                   0                   0                   0                   0                   0

  Column 61

                   0


outer_code_BER =

  Columns 1 through 5

   0.141500879323390   0.138175148203252   0.134853729924419   0.131538204629458   0.128230195980865

  Columns 6 through 10

   0.124931368648882   0.121643425202650   0.118368102385146   0.115107166774749   0.111862409864376

  Columns 11 through 15

   0.108635642622937   0.105428689642400   0.102243383016213   0.099081556139249   0.095945037663722

  Columns 16 through 20

   0.092835645886779   0.089755183880391   0.086705435699124   0.083688164011980   0.080705109496172

  Columns 21 through 25

   0.077757992298172   0.074848515804228   0.071978372861988   0.069149254447863   0.066362860572328

  Columns 26 through 30

   0.063620912947592   0.060925168601948   0.058277433211614   0.055679572447018   0.053133519130552

  Columns 31 through 35

   0.050641273545164   0.048204893925462   0.045826474153937                   0                   0

  Columns 36 through 40

                   0                   0                   0                   0                   0

  Columns 41 through 45

                   0                   0                   0                   0                   0

  Columns 46 through 50

                   0                   0                   0                   0                   0

  Columns 51 through 55

                   0                   0                   0                   0                   0

  Columns 56 through 60

                   0                   0                   0                   0                   0

  Column 61

                   0


inner_code_BER =

  Columns 1 through 5

   0.141500879323390   0.138175148203252   0.134853729924419   0.131538204629457   0.128230195980865

  Columns 6 through 10

   0.124931368648881   0.121643425202649   0.118368102385146   0.115107166774748   0.111862409864375

  Columns 11 through 15

   0.108635642622936   0.105428689642400   0.102243383016212   0.099081556139248   0.095945037663722

  Columns 16 through 20

   0.092835645886779   0.089755183880390   0.086705435699124   0.083688164011978   0.080705109496172

  Columns 21 through 25

   0.077757992298171   0.074848515804224   0.071978372861975   0.069149254447826   0.066362860572218

  Columns 26 through 30

   0.063620912947282   0.060925168601093   0.058277433209333   0.055679572441115   0.053133519115760

  Columns 31 through 35

   0.050641273509265   0.048204893841108   0.045826473962106   0.043508105724145                   0

  Columns 36 through 40

                   0                   0                   0                   0                   0

  Columns 41 through 45

                   0                   0                   0                   0                   0

  Columns 46 through 50

                   0                   0                   0                   0                   0

  Columns 51 through 55

                   0                   0                   0                   0                   0

  Columns 56 through 60

                   0                   0                   0                   0                   0

  Column 61

                   0


outer_code_BER =

  Columns 1 through 5

   0.141500879323390   0.138175148203252   0.134853729924419   0.131538204629458   0.128230195980865

  Columns 6 through 10

   0.124931368648882   0.121643425202650   0.118368102385146   0.115107166774749   0.111862409864376

  Columns 11 through 15

   0.108635642622937   0.105428689642400   0.102243383016213   0.099081556139249   0.095945037663722

  Columns 16 through 20

   0.092835645886779   0.089755183880391   0.086705435699124   0.083688164011980   0.080705109496172

  Columns 21 through 25

   0.077757992298172   0.074848515804228   0.071978372861988   0.069149254447863   0.066362860572328

  Columns 26 through 30

   0.063620912947592   0.060925168601948   0.058277433211614   0.055679572447018   0.053133519130552

  Columns 31 through 35

   0.050641273545164   0.048204893925462   0.045826474153937   0.043508106146153                   0

  Columns 36 through 40

                   0                   0                   0                   0                   0

  Columns 41 through 45

                   0                   0                   0                   0                   0

  Columns 46 through 50

                   0                   0                   0                   0                   0

  Columns 51 through 55

                   0                   0                   0                   0                   0

  Columns 56 through 60

                   0                   0                   0                   0                   0

  Column 61

                   0


inner_code_BER =

  Columns 1 through 5

   0.141500879323390   0.138175148203252   0.134853729924419   0.131538204629457   0.128230195980865

  Columns 6 through 10

   0.124931368648881   0.121643425202649   0.118368102385146   0.115107166774748   0.111862409864375

  Columns 11 through 15

   0.108635642622936   0.105428689642400   0.102243383016212   0.099081556139248   0.095945037663722

  Columns 16 through 20

   0.092835645886779   0.089755183880390   0.086705435699124   0.083688164011978   0.080705109496172

  Columns 21 through 25

   0.077757992298171   0.074848515804224   0.071978372861975   0.069149254447826   0.066362860572218

  Columns 26 through 30

   0.063620912947282   0.060925168601093   0.058277433209333   0.055679572441115   0.053133519115760

  Columns 31 through 35

   0.050641273509265   0.048204893841108   0.045826473962106   0.043508105724145   0.041251824596544

  Columns 36 through 40

                   0                   0                   0                   0                   0

  Columns 41 through 45

                   0                   0                   0                   0                   0

  Columns 46 through 50

                   0                   0                   0                   0                   0

  Columns 51 through 55

                   0                   0                   0                   0                   0

  Columns 56 through 60

                   0                   0                   0                   0                   0

  Column 61

                   0


outer_code_BER =

  Columns 1 through 5

   0.141500879323390   0.138175148203252   0.134853729924419   0.131538204629458   0.128230195980865

  Columns 6 through 10

   0.124931368648882   0.121643425202650   0.118368102385146   0.115107166774749   0.111862409864376

  Columns 11 through 15

   0.108635642622937   0.105428689642400   0.102243383016213   0.099081556139249   0.095945037663722

  Columns 16 through 20

   0.092835645886779   0.089755183880391   0.086705435699124   0.083688164011980   0.080705109496172

  Columns 21 through 25

   0.077757992298172   0.074848515804228   0.071978372861988   0.069149254447863   0.066362860572328

  Columns 26 through 30

   0.063620912947592   0.060925168601948   0.058277433211614   0.055679572447018   0.053133519130552

  Columns 31 through 35

   0.050641273545164   0.048204893925462   0.045826474153937   0.043508106146153   0.041251825494136

  Columns 36 through 40

                   0                   0                   0                   0                   0

  Columns 41 through 45

                   0                   0                   0                   0                   0

  Columns 46 through 50

                   0                   0                   0                   0                   0

  Columns 51 through 55

                   0                   0                   0                   0                   0

  Columns 56 through 60

                   0                   0                   0                   0                   0

  Column 61

                   0


inner_code_BER =

  Columns 1 through 5

   0.141500879323390   0.138175148203252   0.134853729924419   0.131538204629457   0.128230195980865

  Columns 6 through 10

   0.124931368648881   0.121643425202649   0.118368102385146   0.115107166774748   0.111862409864375

  Columns 11 through 15

   0.108635642622936   0.105428689642400   0.102243383016212   0.099081556139248   0.095945037663722

  Columns 16 through 20

   0.092835645886779   0.089755183880390   0.086705435699124   0.083688164011978   0.080705109496172

  Columns 21 through 25

   0.077757992298171   0.074848515804224   0.071978372861975   0.069149254447826   0.066362860572218

  Columns 26 through 30

   0.063620912947282   0.060925168601093   0.058277433209333   0.055679572441115   0.053133519115760

  Columns 31 through 35

   0.050641273509265   0.048204893841108   0.045826473962106   0.043508105724145   0.041251824596544

  Columns 36 through 40

   0.039059538872333                   0                   0                   0                   0

  Columns 41 through 45

                   0                   0                   0                   0                   0

  Columns 46 through 50

                   0                   0                   0                   0                   0

  Columns 51 through 55

                   0                   0                   0                   0                   0

  Columns 56 through 60

                   0                   0                   0                   0                   0

  Column 61

                   0


outer_code_BER =

  Columns 1 through 5

   0.141500879323390   0.138175148203252   0.134853729924419   0.131538204629458   0.128230195980865

  Columns 6 through 10

   0.124931368648882   0.121643425202650   0.118368102385146   0.115107166774749   0.111862409864376

  Columns 11 through 15

   0.108635642622937   0.105428689642400   0.102243383016213   0.099081556139249   0.095945037663722

  Columns 16 through 20

   0.092835645886779   0.089755183880391   0.086705435699124   0.083688164011980   0.080705109496172

  Columns 21 through 25

   0.077757992298172   0.074848515804228   0.071978372861988   0.069149254447863   0.066362860572328

  Columns 26 through 30

   0.063620912947592   0.060925168601948   0.058277433211614   0.055679572447018   0.053133519130552

  Columns 31 through 35

   0.050641273545164   0.048204893925462   0.045826474153937   0.043508106146153   0.041251825494136

  Columns 36 through 40

   0.039059540716975                   0                   0                   0                   0

  Columns 41 through 45

                   0                   0                   0                   0                   0

  Columns 46 through 50

                   0                   0                   0                   0                   0

  Columns 51 through 55

                   0                   0                   0                   0                   0

  Columns 56 through 60

                   0                   0                   0                   0                   0

  Column 61

                   0


inner_code_BER =

  Columns 1 through 5

   0.141500879323390   0.138175148203252   0.134853729924419   0.131538204629457   0.128230195980865

  Columns 6 through 10

   0.124931368648881   0.121643425202649   0.118368102385146   0.115107166774748   0.111862409864375

  Columns 11 through 15

   0.108635642622936   0.105428689642400   0.102243383016212   0.099081556139248   0.095945037663722

  Columns 16 through 20

   0.092835645886779   0.089755183880390   0.086705435699124   0.083688164011978   0.080705109496172

  Columns 21 through 25

   0.077757992298171   0.074848515804224   0.071978372861975   0.069149254447826   0.066362860572218

  Columns 26 through 30

   0.063620912947282   0.060925168601093   0.058277433209333   0.055679572441115   0.053133519115760

  Columns 31 through 35

   0.050641273509265   0.048204893841108   0.045826473962106   0.043508105724145   0.041251824596544

  Columns 36 through 40

   0.039059538872333   0.036932945191269                   0                   0                   0

  Columns 41 through 45

                   0                   0                   0                   0                   0

  Columns 46 through 50

                   0                   0                   0                   0                   0

  Columns 51 through 55

                   0                   0                   0                   0                   0

  Columns 56 through 60

                   0                   0                   0                   0                   0

  Column 61

                   0


outer_code_BER =

  Columns 1 through 5

   0.141500879323390   0.138175148203252   0.134853729924419   0.131538204629458   0.128230195980865

  Columns 6 through 10

   0.124931368648882   0.121643425202650   0.118368102385146   0.115107166774749   0.111862409864376

  Columns 11 through 15

   0.108635642622937   0.105428689642400   0.102243383016213   0.099081556139249   0.095945037663722

  Columns 16 through 20

   0.092835645886779   0.089755183880391   0.086705435699124   0.083688164011980   0.080705109496172

  Columns 21 through 25

   0.077757992298172   0.074848515804228   0.071978372861988   0.069149254447863   0.066362860572328

  Columns 26 through 30

   0.063620912947592   0.060925168601948   0.058277433211614   0.055679572447018   0.053133519130552

  Columns 31 through 35

   0.050641273545164   0.048204893925462   0.045826474153937   0.043508106146153   0.041251825494136

  Columns 36 through 40

   0.039059540716975   0.036932948851265                   0                   0                   0

  Columns 41 through 45

                   0                   0                   0                   0                   0

  Columns 46 through 50

                   0                   0                   0                   0                   0

  Columns 51 through 55

                   0                   0                   0                   0                   0

  Columns 56 through 60

                   0                   0                   0                   0                   0

  Column 61

                   0


inner_code_BER =

  Columns 1 through 5

   0.141500879323390   0.138175148203252   0.134853729924419   0.131538204629457   0.128230195980865

  Columns 6 through 10

   0.124931368648881   0.121643425202649   0.118368102385146   0.115107166774748   0.111862409864375

  Columns 11 through 15

   0.108635642622936   0.105428689642400   0.102243383016212   0.099081556139248   0.095945037663722

  Columns 16 through 20

   0.092835645886779   0.089755183880390   0.086705435699124   0.083688164011978   0.080705109496172

  Columns 21 through 25

   0.077757992298171   0.074848515804224   0.071978372861975   0.069149254447826   0.066362860572218

  Columns 26 through 30

   0.063620912947282   0.060925168601093   0.058277433209333   0.055679572441115   0.053133519115760

  Columns 31 through 35

   0.050641273509265   0.048204893841108   0.045826473962106   0.043508105724145   0.041251824596544

  Columns 36 through 40

   0.039059538872333   0.036932945191269   0.034873435786890                   0                   0

  Columns 41 through 45

                   0                   0                   0                   0                   0

  Columns 46 through 50

                   0                   0                   0                   0                   0

  Columns 51 through 55

                   0                   0                   0                   0                   0

  Columns 56 through 60

                   0                   0                   0                   0                   0

  Column 61

                   0


outer_code_BER =

  Columns 1 through 5

   0.141500879323390   0.138175148203252   0.134853729924419   0.131538204629458   0.128230195980865

  Columns 6 through 10

   0.124931368648882   0.121643425202650   0.118368102385146   0.115107166774749   0.111862409864376

  Columns 11 through 15

   0.108635642622937   0.105428689642400   0.102243383016213   0.099081556139249   0.095945037663722

  Columns 16 through 20

   0.092835645886779   0.089755183880391   0.086705435699124   0.083688164011980   0.080705109496172

  Columns 21 through 25

   0.077757992298172   0.074848515804228   0.071978372861988   0.069149254447863   0.066362860572328

  Columns 26 through 30

   0.063620912947592   0.060925168601948   0.058277433211614   0.055679572447018   0.053133519130552

  Columns 31 through 35

   0.050641273545164   0.048204893925462   0.045826474153937   0.043508106146153   0.041251825494136

  Columns 36 through 40

   0.039059540716975   0.036932948851265   0.034873442791226                   0                   0

  Columns 41 through 45

                   0                   0                   0                   0                   0

  Columns 46 through 50

                   0                   0                   0                   0                   0

  Columns 51 through 55

                   0                   0                   0                   0                   0

  Columns 56 through 60

                   0                   0                   0                   0                   0

  Column 61

                   0


inner_code_BER =

  Columns 1 through 5

   0.141500879323390   0.138175148203252   0.134853729924419   0.131538204629457   0.128230195980865

  Columns 6 through 10

   0.124931368648881   0.121643425202649   0.118368102385146   0.115107166774748   0.111862409864375

  Columns 11 through 15

   0.108635642622936   0.105428689642400   0.102243383016212   0.099081556139248   0.095945037663722

  Columns 16 through 20

   0.092835645886779   0.089755183880390   0.086705435699124   0.083688164011978   0.080705109496172

  Columns 21 through 25

   0.077757992298171   0.074848515804224   0.071978372861975   0.069149254447826   0.066362860572218

  Columns 26 through 30

   0.063620912947282   0.060925168601093   0.058277433209333   0.055679572441115   0.053133519115760

  Columns 31 through 35

   0.050641273509265   0.048204893841108   0.045826473962106   0.043508105724145   0.041251824596544

  Columns 36 through 40

   0.039059538872333   0.036932945191269   0.034873435786890   0.032882005324372                   0

  Columns 41 through 45

                   0                   0                   0                   0                   0

  Columns 46 through 50

                   0                   0                   0                   0                   0

  Columns 51 through 55

                   0                   0                   0                   0                   0

  Columns 56 through 60

                   0                   0                   0                   0                   0

  Column 61

                   0


outer_code_BER =

  Columns 1 through 5

   0.141500879323390   0.138175148203252   0.134853729924419   0.131538204629458   0.128230195980865

  Columns 6 through 10

   0.124931368648882   0.121643425202650   0.118368102385146   0.115107166774749   0.111862409864376

  Columns 11 through 15

   0.108635642622937   0.105428689642400   0.102243383016213   0.099081556139249   0.095945037663722

  Columns 16 through 20

   0.092835645886779   0.089755183880391   0.086705435699124   0.083688164011980   0.080705109496172

  Columns 21 through 25

   0.077757992298172   0.074848515804228   0.071978372861988   0.069149254447863   0.066362860572328

  Columns 26 through 30

   0.063620912947592   0.060925168601948   0.058277433211614   0.055679572447018   0.053133519130552

  Columns 31 through 35

   0.050641273545164   0.048204893925462   0.045826474153937   0.043508106146153   0.041251825494136

  Columns 36 through 40

   0.039059540716975   0.036932948851265   0.034873442791226   0.032882018237401                   0

  Columns 41 through 45

                   0                   0                   0                   0                   0

  Columns 46 through 50

                   0                   0                   0                   0                   0

  Columns 51 through 55

                   0                   0                   0                   0                   0

  Columns 56 through 60

                   0                   0                   0                   0                   0

  Column 61

                   0


inner_code_BER =

  Columns 1 through 5

   0.141500879323390   0.138175148203252   0.134853729924419   0.131538204629457   0.128230195980865

  Columns 6 through 10

   0.124931368648881   0.121643425202649   0.118368102385146   0.115107166774748   0.111862409864375

  Columns 11 through 15

   0.108635642622936   0.105428689642400   0.102243383016212   0.099081556139248   0.095945037663722

  Columns 16 through 20

   0.092835645886779   0.089755183880390   0.086705435699124   0.083688164011978   0.080705109496172

  Columns 21 through 25

   0.077757992298171   0.074848515804224   0.071978372861975   0.069149254447826   0.066362860572218

  Columns 26 through 30

   0.063620912947282   0.060925168601093   0.058277433209333   0.055679572441115   0.053133519115760

  Columns 31 through 35

   0.050641273509265   0.048204893841108   0.045826473962106   0.043508105724145   0.041251824596544

  Columns 36 through 40

   0.039059538872333   0.036932945191269   0.034873435786890   0.032882005324372   0.030959166809029

  Columns 41 through 45

                   0                   0                   0                   0                   0

  Columns 46 through 50

                   0                   0                   0                   0                   0

  Columns 51 through 55

                   0                   0                   0                   0                   0

  Columns 56 through 60

                   0                   0                   0                   0                   0

  Column 61

                   0


outer_code_BER =

  Columns 1 through 5

   0.141500879323390   0.138175148203252   0.134853729924419   0.131538204629458   0.128230195980865

  Columns 6 through 10

   0.124931368648882   0.121643425202650   0.118368102385146   0.115107166774749   0.111862409864376

  Columns 11 through 15

   0.108635642622937   0.105428689642400   0.102243383016213   0.099081556139249   0.095945037663722

  Columns 16 through 20

   0.092835645886779   0.089755183880391   0.086705435699124   0.083688164011980   0.080705109496172

  Columns 21 through 25

   0.077757992298172   0.074848515804228   0.071978372861988   0.069149254447863   0.066362860572328

  Columns 26 through 30

   0.063620912947592   0.060925168601948   0.058277433211614   0.055679572447018   0.053133519130552

  Columns 31 through 35

   0.050641273545164   0.048204893925462   0.045826474153937   0.043508106146153   0.041251825494136

  Columns 36 through 40

   0.039059540716975   0.036932948851265   0.034873442791226   0.032882018237401   0.030959189702521

  Columns 41 through 45

                   0                   0                   0                   0                   0

  Columns 46 through 50

                   0                   0                   0                   0                   0

  Columns 51 through 55

                   0                   0                   0                   0                   0

  Columns 56 through 60

                   0                   0                   0                   0                   0

  Column 61

                   0


inner_code_BER =

  Columns 1 through 5

   0.141500879323390   0.138175148203252   0.134853729924419   0.131538204629457   0.128230195980865

  Columns 6 through 10

   0.124931368648881   0.121643425202649   0.118368102385146   0.115107166774748   0.111862409864375

  Columns 11 through 15

   0.108635642622936   0.105428689642400   0.102243383016212   0.099081556139248   0.095945037663722

  Columns 16 through 20

   0.092835645886779   0.089755183880390   0.086705435699124   0.083688164011978   0.080705109496172

  Columns 21 through 25

   0.077757992298171   0.074848515804224   0.071978372861975   0.069149254447826   0.066362860572218

  Columns 26 through 30

   0.063620912947282   0.060925168601093   0.058277433209333   0.055679572441115   0.053133519115760

  Columns 31 through 35

   0.050641273509265   0.048204893841108   0.045826473962106   0.043508105724145   0.041251824596544

  Columns 36 through 40

   0.039059538872333   0.036932945191269   0.034873435786890   0.032882005324372   0.030959166809029

  Columns 41 through 45

   0.029104886279504                   0                   0                   0                   0

  Columns 46 through 50

                   0                   0                   0                   0                   0

  Columns 51 through 55

                   0                   0                   0                   0                   0

  Columns 56 through 60

                   0                   0                   0                   0                   0

  Column 61

                   0


outer_code_BER =

  Columns 1 through 5

   0.141500879323390   0.138175148203252   0.134853729924419   0.131538204629458   0.128230195980865

  Columns 6 through 10

   0.124931368648882   0.121643425202650   0.118368102385146   0.115107166774749   0.111862409864376

  Columns 11 through 15

   0.108635642622937   0.105428689642400   0.102243383016213   0.099081556139249   0.095945037663722

  Columns 16 through 20

   0.092835645886779   0.089755183880391   0.086705435699124   0.083688164011980   0.080705109496172

  Columns 21 through 25

   0.077757992298172   0.074848515804228   0.071978372861988   0.069149254447863   0.066362860572328

  Columns 26 through 30

   0.063620912947592   0.060925168601948   0.058277433211614   0.055679572447018   0.053133519130552

  Columns 31 through 35

   0.050641273545164   0.048204893925462   0.045826474153937   0.043508106146153   0.041251825494136

  Columns 36 through 40

   0.039059540716975   0.036932948851265   0.034873442791226   0.032882018237401   0.030959189702521

  Columns 41 through 45

   0.029104925210620                   0                   0                   0                   0

  Columns 46 through 50

                   0                   0                   0                   0                   0

  Columns 51 through 55

                   0                   0                   0                   0                   0

  Columns 56 through 60

                   0                   0                   0                   0                   0

  Column 61

                   0


inner_code_BER =

  Columns 1 through 5

   0.141500879323390   0.138175148203252   0.134853729924419   0.131538204629457   0.128230195980865

  Columns 6 through 10

   0.124931368648881   0.121643425202649   0.118368102385146   0.115107166774748   0.111862409864375

  Columns 11 through 15

   0.108635642622936   0.105428689642400   0.102243383016212   0.099081556139248   0.095945037663722

  Columns 16 through 20

   0.092835645886779   0.089755183880390   0.086705435699124   0.083688164011978   0.080705109496172

  Columns 21 through 25

   0.077757992298171   0.074848515804224   0.071978372861975   0.069149254447826   0.066362860572218

  Columns 26 through 30

   0.063620912947282   0.060925168601093   0.058277433209333   0.055679572441115   0.053133519115760

  Columns 31 through 35

   0.050641273509265   0.048204893841108   0.045826473962106   0.043508105724145   0.041251824596544

  Columns 36 through 40

   0.039059538872333   0.036932945191269   0.034873435786890   0.032882005324372   0.030959166809029

  Columns 41 through 45

   0.029104886279504   0.027318544637929                   0                   0                   0

  Columns 46 through 50

                   0                   0                   0                   0                   0

  Columns 51 through 55

                   0                   0                   0                   0                   0

  Columns 56 through 60

                   0                   0                   0                   0                   0

  Column 61

                   0


outer_code_BER =

  Columns 1 through 5

   0.141500879323390   0.138175148203252   0.134853729924419   0.131538204629458   0.128230195980865

  Columns 6 through 10

   0.124931368648882   0.121643425202650   0.118368102385146   0.115107166774749   0.111862409864376

  Columns 11 through 15

   0.108635642622937   0.105428689642400   0.102243383016213   0.099081556139249   0.095945037663722

  Columns 16 through 20

   0.092835645886779   0.089755183880391   0.086705435699124   0.083688164011980   0.080705109496172

  Columns 21 through 25

   0.077757992298172   0.074848515804228   0.071978372861988   0.069149254447863   0.066362860572328

  Columns 26 through 30

   0.063620912947592   0.060925168601948   0.058277433211614   0.055679572447018   0.053133519130552

  Columns 31 through 35

   0.050641273545164   0.048204893925462   0.045826474153937   0.043508106146153   0.041251825494136

  Columns 36 through 40

   0.039059540716975   0.036932948851265   0.034873442791226   0.032882018237401   0.030959189702521

  Columns 41 through 45

   0.029104925210620   0.027318607877193                   0                   0                   0

  Columns 46 through 50

                   0                   0                   0                   0                   0

  Columns 51 through 55

                   0                   0                   0                   0                   0

  Columns 56 through 60

                   0                   0                   0                   0                   0

  Column 61

                   0


inner_code_BER =

  Columns 1 through 5

   0.141500879323390   0.138175148203252   0.134853729924419   0.131538204629457   0.128230195980865

  Columns 6 through 10

   0.124931368648881   0.121643425202649   0.118368102385146   0.115107166774748   0.111862409864375

  Columns 11 through 15

   0.108635642622936   0.105428689642400   0.102243383016212   0.099081556139248   0.095945037663722

  Columns 16 through 20

   0.092835645886779   0.089755183880390   0.086705435699124   0.083688164011978   0.080705109496172

  Columns 21 through 25

   0.077757992298171   0.074848515804224   0.071978372861975   0.069149254447826   0.066362860572218

  Columns 26 through 30

   0.063620912947282   0.060925168601093   0.058277433209333   0.055679572441115   0.053133519115760

  Columns 31 through 35

   0.050641273509265   0.048204893841108   0.045826473962106   0.043508105724145   0.041251824596544

  Columns 36 through 40

   0.039059538872333   0.036932945191269   0.034873435786890   0.032882005324372   0.030959166809029

  Columns 41 through 45

   0.029104886279504   0.027318544637929   0.025598932261282                   0                   0

  Columns 46 through 50

                   0                   0                   0                   0                   0

  Columns 51 through 55

                   0                   0                   0                   0                   0

  Columns 56 through 60

                   0                   0                   0                   0                   0

  Column 61

                   0


outer_code_BER =

  Columns 1 through 5

   0.141500879323390   0.138175148203252   0.134853729924419   0.131538204629458   0.128230195980865

  Columns 6 through 10

   0.124931368648882   0.121643425202650   0.118368102385146   0.115107166774749   0.111862409864376

  Columns 11 through 15

   0.108635642622937   0.105428689642400   0.102243383016213   0.099081556139249   0.095945037663722

  Columns 16 through 20

   0.092835645886779   0.089755183880391   0.086705435699124   0.083688164011980   0.080705109496172

  Columns 21 through 25

   0.077757992298172   0.074848515804228   0.071978372861988   0.069149254447863   0.066362860572328

  Columns 26 through 30

   0.063620912947592   0.060925168601948   0.058277433211614   0.055679572447018   0.053133519130552

  Columns 31 through 35

   0.050641273545164   0.048204893925462   0.045826474153937   0.043508106146153   0.041251825494136

  Columns 36 through 40

   0.039059540716975   0.036932948851265   0.034873442791226   0.032882018237401   0.030959189702521

  Columns 41 through 45

   0.029104925210620   0.027318607877193   0.025599029694217                   0                   0

  Columns 46 through 50

                   0                   0                   0                   0                   0

  Columns 51 through 55

                   0                   0                   0                   0                   0

  Columns 56 through 60

                   0                   0                   0                   0                   0

  Column 61

                   0


inner_code_BER =

  Columns 1 through 5

   0.141500879323390   0.138175148203252   0.134853729924419   0.131538204629457   0.128230195980865

  Columns 6 through 10

   0.124931368648881   0.121643425202649   0.118368102385146   0.115107166774748   0.111862409864375

  Columns 11 through 15

   0.108635642622936   0.105428689642400   0.102243383016212   0.099081556139248   0.095945037663722

  Columns 16 through 20

   0.092835645886779   0.089755183880390   0.086705435699124   0.083688164011978   0.080705109496172

  Columns 21 through 25

   0.077757992298171   0.074848515804224   0.071978372861975   0.069149254447826   0.066362860572218

  Columns 26 through 30

   0.063620912947282   0.060925168601093   0.058277433209333   0.055679572441115   0.053133519115760

  Columns 31 through 35

   0.050641273509265   0.048204893841108   0.045826473962106   0.043508105724145   0.041251824596544

  Columns 36 through 40

   0.039059538872333   0.036932945191269   0.034873435786890   0.032882005324372   0.030959166809029

  Columns 41 through 45

   0.029104886279504   0.027318544637929   0.025598932261282   0.023944278684672                   0

  Columns 46 through 50

                   0                   0                   0                   0                   0

  Columns 51 through 55

                   0                   0                   0                   0                   0

  Columns 56 through 60

                   0                   0                   0                   0                   0

  Column 61

                   0


outer_code_BER =

  Columns 1 through 5

   0.141500879323390   0.138175148203252   0.134853729924419   0.131538204629458   0.128230195980865

  Columns 6 through 10

   0.124931368648882   0.121643425202650   0.118368102385146   0.115107166774749   0.111862409864376

  Columns 11 through 15

   0.108635642622937   0.105428689642400   0.102243383016213   0.099081556139249   0.095945037663722

  Columns 16 through 20

   0.092835645886779   0.089755183880391   0.086705435699124   0.083688164011980   0.080705109496172

  Columns 21 through 25

   0.077757992298172   0.074848515804228   0.071978372861988   0.069149254447863   0.066362860572328

  Columns 26 through 30

   0.063620912947592   0.060925168601948   0.058277433211614   0.055679572447018   0.053133519130552

  Columns 31 through 35

   0.050641273545164   0.048204893925462   0.045826474153937   0.043508106146153   0.041251825494136

  Columns 36 through 40

   0.039059540716975   0.036932948851265   0.034873442791226   0.032882018237401   0.030959189702521

  Columns 41 through 45

   0.029104925210620   0.027318607877193   0.025599029694217   0.023944419214671                   0

  Columns 46 through 50

                   0                   0                   0                   0                   0

  Columns 51 through 55

                   0                   0                   0                   0                   0

  Columns 56 through 60

                   0                   0                   0                   0                   0

  Column 61

                   0


inner_code_BER =

  Columns 1 through 5

   0.141500879323390   0.138175148203252   0.134853729924419   0.131538204629457   0.128230195980865

  Columns 6 through 10

   0.124931368648881   0.121643425202649   0.118368102385146   0.115107166774748   0.111862409864375

  Columns 11 through 15

   0.108635642622936   0.105428689642400   0.102243383016212   0.099081556139248   0.095945037663722

  Columns 16 through 20

   0.092835645886779   0.089755183880390   0.086705435699124   0.083688164011978   0.080705109496172

  Columns 21 through 25

   0.077757992298171   0.074848515804224   0.071978372861975   0.069149254447826   0.066362860572218

  Columns 26 through 30

   0.063620912947282   0.060925168601093   0.058277433209333   0.055679572441115   0.053133519115760

  Columns 31 through 35

   0.050641273509265   0.048204893841108   0.045826473962106   0.043508105724145   0.041251824596544

  Columns 36 through 40

   0.039059538872333   0.036932945191269   0.034873435786890   0.032882005324372   0.030959166809029

  Columns 41 through 45

   0.029104886279504   0.027318544637929   0.025598932261282   0.023944278684672   0.022352316615588

  Columns 46 through 50

                   0                   0                   0                   0                   0

  Columns 51 through 55

                   0                   0                   0                   0                   0

  Columns 56 through 60

                   0                   0                   0                   0                   0

  Column 61

                   0


outer_code_BER =

  Columns 1 through 5

   0.141500879323390   0.138175148203252   0.134853729924419   0.131538204629458   0.128230195980865

  Columns 6 through 10

   0.124931368648882   0.121643425202650   0.118368102385146   0.115107166774749   0.111862409864376

  Columns 11 through 15

   0.108635642622937   0.105428689642400   0.102243383016213   0.099081556139249   0.095945037663722

  Columns 16 through 20

   0.092835645886779   0.089755183880391   0.086705435699124   0.083688164011980   0.080705109496172

  Columns 21 through 25

   0.077757992298172   0.074848515804228   0.071978372861988   0.069149254447863   0.066362860572328

  Columns 26 through 30

   0.063620912947592   0.060925168601948   0.058277433211614   0.055679572447018   0.053133519130552

  Columns 31 through 35

   0.050641273545164   0.048204893925462   0.045826474153937   0.043508106146153   0.041251825494136

  Columns 36 through 40

   0.039059540716975   0.036932948851265   0.034873442791226   0.032882018237401   0.030959189702521

  Columns 41 through 45

   0.029104925210620   0.027318607877193   0.025599029694217   0.023944419214671   0.022352501321462

  Columns 46 through 50

                   0                   0                   0                   0                   0

  Columns 51 through 55

                   0                   0                   0                   0                   0

  Columns 56 through 60

                   0                   0                   0                   0                   0

  Column 61

                   0


inner_code_BER =

  Columns 1 through 5

   0.141500879323390   0.138175148203252   0.134853729924419   0.131538204629457   0.128230195980865

  Columns 6 through 10

   0.124931368648881   0.121643425202649   0.118368102385146   0.115107166774748   0.111862409864375

  Columns 11 through 15

   0.108635642622936   0.105428689642400   0.102243383016212   0.099081556139248   0.095945037663722

  Columns 16 through 20

   0.092835645886779   0.089755183880390   0.086705435699124   0.083688164011978   0.080705109496172

  Columns 21 through 25

   0.077757992298171   0.074848515804224   0.071978372861975   0.069149254447826   0.066362860572218

  Columns 26 through 30

   0.063620912947282   0.060925168601093   0.058277433209333   0.055679572441115   0.053133519115760

  Columns 31 through 35

   0.050641273509265   0.048204893841108   0.045826473962106   0.043508105724145   0.041251824596544

  Columns 36 through 40

   0.039059538872333   0.036932945191269   0.034873435786890   0.032882005324372   0.030959166809029

  Columns 41 through 45

   0.029104886279504   0.027318544637929   0.025598932261282   0.023944278684672   0.022352316615588

  Columns 46 through 50

   0.020820377791481                   0                   0                   0                   0

  Columns 51 through 55

                   0                   0                   0                   0                   0

  Columns 56 through 60

                   0                   0                   0                   0                   0

  Column 61

                   0


outer_code_BER =

  Columns 1 through 5

   0.141500879323390   0.138175148203252   0.134853729924419   0.131538204629458   0.128230195980865

  Columns 6 through 10

   0.124931368648882   0.121643425202650   0.118368102385146   0.115107166774749   0.111862409864376

  Columns 11 through 15

   0.108635642622937   0.105428689642400   0.102243383016213   0.099081556139249   0.095945037663722

  Columns 16 through 20

   0.092835645886779   0.089755183880391   0.086705435699124   0.083688164011980   0.080705109496172

  Columns 21 through 25

   0.077757992298172   0.074848515804228   0.071978372861988   0.069149254447863   0.066362860572328

  Columns 26 through 30

   0.063620912947592   0.060925168601948   0.058277433211614   0.055679572447018   0.053133519130552

  Columns 31 through 35

   0.050641273545164   0.048204893925462   0.045826474153937   0.043508106146153   0.041251825494136

  Columns 36 through 40

   0.039059540716975   0.036932948851265   0.034873442791226   0.032882018237401   0.030959189702521

  Columns 41 through 45

   0.029104925210620   0.027318607877193   0.025599029694217   0.023944419214671   0.022352501321462

  Columns 46 through 50

   0.020820584712800                   0                   0                   0                   0

  Columns 51 through 55

                   0                   0                   0                   0                   0

  Columns 56 through 60

                   0                   0                   0                   0                   0

  Column 61

                   0


inner_code_BER =

  Columns 1 through 5

   0.141500879323390   0.138175148203252   0.134853729924419   0.131538204629457   0.128230195980865

  Columns 6 through 10

   0.124931368648881   0.121643425202649   0.118368102385146   0.115107166774748   0.111862409864375

  Columns 11 through 15

   0.108635642622936   0.105428689642400   0.102243383016212   0.099081556139248   0.095945037663722

  Columns 16 through 20

   0.092835645886779   0.089755183880390   0.086705435699124   0.083688164011978   0.080705109496172

  Columns 21 through 25

   0.077757992298171   0.074848515804224   0.071978372861975   0.069149254447826   0.066362860572218

  Columns 26 through 30

   0.063620912947282   0.060925168601093   0.058277433209333   0.055679572441115   0.053133519115760

  Columns 31 through 35

   0.050641273509265   0.048204893841108   0.045826473962106   0.043508105724145   0.041251824596544

  Columns 36 through 40

   0.039059538872333   0.036932945191269   0.034873435786890   0.032882005324372   0.030959166809029

  Columns 41 through 45

   0.029104886279504   0.027318544637929   0.025598932261282   0.023944278684672   0.022352316615588

  Columns 46 through 50

   0.020820377791481   0.019345518463543                   0                   0                   0

  Columns 51 through 55

                   0                   0                   0                   0                   0

  Columns 56 through 60

                   0                   0                   0                   0                   0

  Column 61

                   0


outer_code_BER =

  Columns 1 through 5

   0.141500879323390   0.138175148203252   0.134853729924419   0.131538204629458   0.128230195980865

  Columns 6 through 10

   0.124931368648882   0.121643425202650   0.118368102385146   0.115107166774749   0.111862409864376

  Columns 11 through 15

   0.108635642622937   0.105428689642400   0.102243383016213   0.099081556139249   0.095945037663722

  Columns 16 through 20

   0.092835645886779   0.089755183880391   0.086705435699124   0.083688164011980   0.080705109496172

  Columns 21 through 25

   0.077757992298172   0.074848515804228   0.071978372861988   0.069149254447863   0.066362860572328

  Columns 26 through 30

   0.063620912947592   0.060925168601948   0.058277433211614   0.055679572447018   0.053133519130552

  Columns 31 through 35

   0.050641273545164   0.048204893925462   0.045826474153937   0.043508106146153   0.041251825494136

  Columns 36 through 40

   0.039059540716975   0.036932948851265   0.034873442791226   0.032882018237401   0.030959189702521

  Columns 41 through 45

   0.029104925210620   0.027318607877193   0.025599029694217   0.023944419214671   0.022352501321462

  Columns 46 through 50

   0.020820584712800   0.019345671699460                   0                   0                   0

  Columns 51 through 55

                   0                   0                   0                   0                   0

  Columns 56 through 60

                   0                   0                   0                   0                   0

  Column 61

                   0


inner_code_BER =

  Columns 1 through 5

   0.141500879323390   0.138175148203252   0.134853729924419   0.131538204629457   0.128230195980865

  Columns 6 through 10

   0.124931368648881   0.121643425202649   0.118368102385146   0.115107166774748   0.111862409864375

  Columns 11 through 15

   0.108635642622936   0.105428689642400   0.102243383016212   0.099081556139248   0.095945037663722

  Columns 16 through 20

   0.092835645886779   0.089755183880390   0.086705435699124   0.083688164011978   0.080705109496172

  Columns 21 through 25

   0.077757992298171   0.074848515804224   0.071978372861975   0.069149254447826   0.066362860572218

  Columns 26 through 30

   0.063620912947282   0.060925168601093   0.058277433209333   0.055679572441115   0.053133519115760

  Columns 31 through 35

   0.050641273509265   0.048204893841108   0.045826473962106   0.043508105724145   0.041251824596544

  Columns 36 through 40

   0.039059538872333   0.036932945191269   0.034873435786890   0.032882005324372   0.030959166809029

  Columns 41 through 45

   0.029104886279504   0.027318544637929   0.025598932261282   0.023944278684672   0.022352316615588

  Columns 46 through 50

   0.020820377791481   0.019345518463543   0.017924674983597                   0                   0

  Columns 51 through 55

                   0                   0                   0                   0                   0

  Columns 56 through 60

                   0                   0                   0                   0                   0

  Column 61

                   0


outer_code_BER =

  Columns 1 through 5

   0.141500879323390   0.138175148203252   0.134853729924419   0.131538204629458   0.128230195980865

  Columns 6 through 10

   0.124931368648882   0.121643425202650   0.118368102385146   0.115107166774749   0.111862409864376

  Columns 11 through 15

   0.108635642622937   0.105428689642400   0.102243383016213   0.099081556139249   0.095945037663722

  Columns 16 through 20

   0.092835645886779   0.089755183880391   0.086705435699124   0.083688164011980   0.080705109496172

  Columns 21 through 25

   0.077757992298172   0.074848515804228   0.071978372861988   0.069149254447863   0.066362860572328

  Columns 26 through 30

   0.063620912947592   0.060925168601948   0.058277433211614   0.055679572447018   0.053133519130552

  Columns 31 through 35

   0.050641273545164   0.048204893925462   0.045826474153937   0.043508106146153   0.041251825494136

  Columns 36 through 40

   0.039059540716975   0.036932948851265   0.034873442791226   0.032882018237401   0.030959189702521

  Columns 41 through 45

   0.029104925210620   0.027318607877193   0.025599029694217   0.023944419214671   0.022352501321462

  Columns 46 through 50

   0.020820584712800   0.019345671699460   0.017924585588780                   0                   0

  Columns 51 through 55

                   0                   0                   0                   0                   0

  Columns 56 through 60

                   0                   0                   0                   0                   0

  Column 61

                   0


inner_code_BER =

  Columns 1 through 5

   0.141500879323390   0.138175148203252   0.134853729924419   0.131538204629457   0.128230195980865

  Columns 6 through 10

   0.124931368648881   0.121643425202649   0.118368102385146   0.115107166774748   0.111862409864375

  Columns 11 through 15

   0.108635642622936   0.105428689642400   0.102243383016212   0.099081556139248   0.095945037663722

  Columns 16 through 20

   0.092835645886779   0.089755183880390   0.086705435699124   0.083688164011978   0.080705109496172

  Columns 21 through 25

   0.077757992298171   0.074848515804224   0.071978372861975   0.069149254447826   0.066362860572218

  Columns 26 through 30

   0.063620912947282   0.060925168601093   0.058277433209333   0.055679572441115   0.053133519115760

  Columns 31 through 35

   0.050641273509265   0.048204893841108   0.045826473962106   0.043508105724145   0.041251824596544

  Columns 36 through 40

   0.039059538872333   0.036932945191269   0.034873435786890   0.032882005324372   0.030959166809029

  Columns 41 through 45

   0.029104886279504   0.027318544637929   0.025598932261282   0.023944278684672   0.022352316615588

  Columns 46 through 50

   0.020820377791481   0.019345518463543   0.017924674983597   0.016554855176389                   0

  Columns 51 through 55

                   0                   0                   0                   0                   0

  Columns 56 through 60

                   0                   0                   0                   0                   0

  Column 61

                   0


outer_code_BER =

  Columns 1 through 5

   0.141500879323390   0.138175148203252   0.134853729924419   0.131538204629458   0.128230195980865

  Columns 6 through 10

   0.124931368648882   0.121643425202650   0.118368102385146   0.115107166774749   0.111862409864376

  Columns 11 through 15

   0.108635642622937   0.105428689642400   0.102243383016213   0.099081556139249   0.095945037663722

  Columns 16 through 20

   0.092835645886779   0.089755183880391   0.086705435699124   0.083688164011980   0.080705109496172

  Columns 21 through 25

   0.077757992298172   0.074848515804228   0.071978372861988   0.069149254447863   0.066362860572328

  Columns 26 through 30

   0.063620912947592   0.060925168601948   0.058277433211614   0.055679572447018   0.053133519130552

  Columns 31 through 35

   0.050641273545164   0.048204893925462   0.045826474153937   0.043508106146153   0.041251825494136

  Columns 36 through 40

   0.039059540716975   0.036932948851265   0.034873442791226   0.032882018237401   0.030959189702521

  Columns 41 through 45

   0.029104925210620   0.027318607877193   0.025599029694217   0.023944419214671   0.022352501321462

  Columns 46 through 50

   0.020820584712800   0.019345671699460   0.017924585588780   0.016554113231756                   0

  Columns 51 through 55

                   0                   0                   0                   0                   0

  Columns 56 through 60

                   0                   0                   0                   0                   0

  Column 61

                   0


inner_code_BER =

  Columns 1 through 5

   0.141500879323390   0.138175148203252   0.134853729924419   0.131538204629457   0.128230195980865

  Columns 6 through 10

   0.124931368648881   0.121643425202649   0.118368102385146   0.115107166774748   0.111862409864375

  Columns 11 through 15

   0.108635642622936   0.105428689642400   0.102243383016212   0.099081556139248   0.095945037663722

  Columns 16 through 20

   0.092835645886779   0.089755183880390   0.086705435699124   0.083688164011978   0.080705109496172

  Columns 21 through 25

   0.077757992298171   0.074848515804224   0.071978372861975   0.069149254447826   0.066362860572218

  Columns 26 through 30

   0.063620912947282   0.060925168601093   0.058277433209333   0.055679572441115   0.053133519115760

  Columns 31 through 35

   0.050641273509265   0.048204893841108   0.045826473962106   0.043508105724145   0.041251824596544

  Columns 36 through 40

   0.039059538872333   0.036932945191269   0.034873435786890   0.032882005324372   0.030959166809029

  Columns 41 through 45

   0.029104886279504   0.027318544637929   0.025598932261282   0.023944278684672   0.022352316615588

  Columns 46 through 50

   0.020820377791481   0.019345518463543   0.017924674983597   0.016554855176389   0.015233378598917

  Columns 51 through 55

                   0                   0                   0                   0                   0

  Columns 56 through 60

                   0                   0                   0                   0                   0

  Column 61

                   0


outer_code_BER =

  Columns 1 through 5

   0.141500879323390   0.138175148203252   0.134853729924419   0.131538204629458   0.128230195980865

  Columns 6 through 10

   0.124931368648882   0.121643425202650   0.118368102385146   0.115107166774749   0.111862409864376

  Columns 11 through 15

   0.108635642622937   0.105428689642400   0.102243383016213   0.099081556139249   0.095945037663722

  Columns 16 through 20

   0.092835645886779   0.089755183880391   0.086705435699124   0.083688164011980   0.080705109496172

  Columns 21 through 25

   0.077757992298172   0.074848515804228   0.071978372861988   0.069149254447863   0.066362860572328

  Columns 26 through 30

   0.063620912947592   0.060925168601948   0.058277433211614   0.055679572447018   0.053133519130552

  Columns 31 through 35

   0.050641273545164   0.048204893925462   0.045826474153937   0.043508106146153   0.041251825494136

  Columns 36 through 40

   0.039059540716975   0.036932948851265   0.034873442791226   0.032882018237401   0.030959189702521

  Columns 41 through 45

   0.029104925210620   0.027318607877193   0.025599029694217   0.023944419214671   0.022352501321462

  Columns 46 through 50

   0.020820584712800   0.019345671699460   0.017924585588780   0.016554113231756   0.015231163937115

  Columns 51 through 55

                   0                   0                   0                   0                   0

  Columns 56 through 60

                   0                   0                   0                   0                   0

  Column 61

                   0


inner_code_BER =

  Columns 1 through 5

   0.141500879323390   0.138175148203252   0.134853729924419   0.131538204629457   0.128230195980865

  Columns 6 through 10

   0.124931368648881   0.121643425202649   0.118368102385146   0.115107166774748   0.111862409864375

  Columns 11 through 15

   0.108635642622936   0.105428689642400   0.102243383016212   0.099081556139248   0.095945037663722

  Columns 16 through 20

   0.092835645886779   0.089755183880390   0.086705435699124   0.083688164011978   0.080705109496172

  Columns 21 through 25

   0.077757992298171   0.074848515804224   0.071978372861975   0.069149254447826   0.066362860572218

  Columns 26 through 30

   0.063620912947282   0.060925168601093   0.058277433209333   0.055679572441115   0.053133519115760

  Columns 31 through 35

   0.050641273509265   0.048204893841108   0.045826473962106   0.043508105724145   0.041251824596544

  Columns 36 through 40

   0.039059538872333   0.036932945191269   0.034873435786890   0.032882005324372   0.030959166809029

  Columns 41 through 45

   0.029104886279504   0.027318544637929   0.025598932261282   0.023944278684672   0.022352316615588

  Columns 46 through 50

   0.020820377791481   0.019345518463543   0.017924674983597   0.016554855176389   0.015233378598917

  Columns 51 through 55

   0.013958187216692                   0                   0                   0                   0

  Columns 56 through 60

                   0                   0                   0                   0                   0

  Column 61

                   0


outer_code_BER =

  Columns 1 through 5

   0.141500879323390   0.138175148203252   0.134853729924419   0.131538204629458   0.128230195980865

  Columns 6 through 10

   0.124931368648882   0.121643425202650   0.118368102385146   0.115107166774749   0.111862409864376

  Columns 11 through 15

   0.108635642622937   0.105428689642400   0.102243383016213   0.099081556139249   0.095945037663722

  Columns 16 through 20

   0.092835645886779   0.089755183880391   0.086705435699124   0.083688164011980   0.080705109496172

  Columns 21 through 25

   0.077757992298172   0.074848515804228   0.071978372861988   0.069149254447863   0.066362860572328

  Columns 26 through 30

   0.063620912947592   0.060925168601948   0.058277433211614   0.055679572447018   0.053133519130552

  Columns 31 through 35

   0.050641273545164   0.048204893925462   0.045826474153937   0.043508106146153   0.041251825494136

  Columns 36 through 40

   0.039059540716975   0.036932948851265   0.034873442791226   0.032882018237401   0.030959189702521

  Columns 41 through 45

   0.029104925210620   0.027318607877193   0.025599029694217   0.023944419214671   0.022352501321462

  Columns 46 through 50

   0.020820584712800   0.019345671699460   0.017924585588780   0.016554113231756   0.015231163937115

  Columns 51 through 55

   0.013952950258553                   0                   0                   0                   0

  Columns 56 through 60

                   0                   0                   0                   0                   0

  Column 61

                   0


inner_code_BER =

  Columns 1 through 5

   0.141500879323390   0.138175148203252   0.134853729924419   0.131538204629457   0.128230195980865

  Columns 6 through 10

   0.124931368648881   0.121643425202649   0.118368102385146   0.115107166774748   0.111862409864375

  Columns 11 through 15

   0.108635642622936   0.105428689642400   0.102243383016212   0.099081556139248   0.095945037663722

  Columns 16 through 20

   0.092835645886779   0.089755183880390   0.086705435699124   0.083688164011978   0.080705109496172

  Columns 21 through 25

   0.077757992298171   0.074848515804224   0.071978372861975   0.069149254447826   0.066362860572218

  Columns 26 through 30

   0.063620912947282   0.060925168601093   0.058277433209333   0.055679572441115   0.053133519115760

  Columns 31 through 35

   0.050641273509265   0.048204893841108   0.045826473962106   0.043508105724145   0.041251824596544

  Columns 36 through 40

   0.039059538872333   0.036932945191269   0.034873435786890   0.032882005324372   0.030959166809029

  Columns 41 through 45

   0.029104886279504   0.027318544637929   0.025598932261282   0.023944278684672   0.022352316615588

  Columns 46 through 50

   0.020820377791481   0.019345518463543   0.017924674983597   0.016554855176389   0.015233378598917

  Columns 51 through 55

   0.013958187216692   0.012728253696597                   0                   0                   0

  Columns 56 through 60

                   0                   0                   0                   0                   0

  Column 61

                   0


outer_code_BER =

  Columns 1 through 5

   0.141500879323390   0.138175148203252   0.134853729924419   0.131538204629458   0.128230195980865

  Columns 6 through 10

   0.124931368648882   0.121643425202650   0.118368102385146   0.115107166774749   0.111862409864376

  Columns 11 through 15

   0.108635642622937   0.105428689642400   0.102243383016213   0.099081556139249   0.095945037663722

  Columns 16 through 20

   0.092835645886779   0.089755183880391   0.086705435699124   0.083688164011980   0.080705109496172

  Columns 21 through 25

   0.077757992298172   0.074848515804228   0.071978372861988   0.069149254447863   0.066362860572328

  Columns 26 through 30

   0.063620912947592   0.060925168601948   0.058277433211614   0.055679572447018   0.053133519130552

  Columns 31 through 35

   0.050641273545164   0.048204893925462   0.045826474153937   0.043508106146153   0.041251825494136

  Columns 36 through 40

   0.039059540716975   0.036932948851265   0.034873442791226   0.032882018237401   0.030959189702521

  Columns 41 through 45

   0.029104925210620   0.027318607877193   0.025599029694217   0.023944419214671   0.022352501321462

  Columns 46 through 50

   0.020820584712800   0.019345671699460   0.017924585588780   0.016554113231756   0.015231163937115

  Columns 51 through 55

   0.013952950258553   0.012717199216756                   0                   0                   0

  Columns 56 through 60

                   0                   0                   0                   0                   0

  Column 61

                   0


inner_code_BER =

  Columns 1 through 5

   0.141500879323390   0.138175148203252   0.134853729924419   0.131538204629457   0.128230195980865

  Columns 6 through 10

   0.124931368648881   0.121643425202649   0.118368102385146   0.115107166774748   0.111862409864375

  Columns 11 through 15

   0.108635642622936   0.105428689642400   0.102243383016212   0.099081556139248   0.095945037663722

  Columns 16 through 20

   0.092835645886779   0.089755183880390   0.086705435699124   0.083688164011978   0.080705109496172

  Columns 21 through 25

   0.077757992298171   0.074848515804224   0.071978372861975   0.069149254447826   0.066362860572218

  Columns 26 through 30

   0.063620912947282   0.060925168601093   0.058277433209333   0.055679572441115   0.053133519115760

  Columns 31 through 35

   0.050641273509265   0.048204893841108   0.045826473962106   0.043508105724145   0.041251824596544

  Columns 36 through 40

   0.039059538872333   0.036932945191269   0.034873435786890   0.032882005324372   0.030959166809029

  Columns 41 through 45

   0.029104886279504   0.027318544637929   0.025598932261282   0.023944278684672   0.022352316615588

  Columns 46 through 50

   0.020820377791481   0.019345518463543   0.017924674983597   0.016554855176389   0.015233378598917

  Columns 51 through 55

   0.013958187216692   0.012728253696597   0.011544107364861                   0                   0

  Columns 56 through 60

                   0                   0                   0                   0                   0

  Column 61

                   0


outer_code_BER =

  Columns 1 through 5

   0.141500879323390   0.138175148203252   0.134853729924419   0.131538204629458   0.128230195980865

  Columns 6 through 10

   0.124931368648882   0.121643425202650   0.118368102385146   0.115107166774749   0.111862409864376

  Columns 11 through 15

   0.108635642622937   0.105428689642400   0.102243383016213   0.099081556139249   0.095945037663722

  Columns 16 through 20

   0.092835645886779   0.089755183880391   0.086705435699124   0.083688164011980   0.080705109496172

  Columns 21 through 25

   0.077757992298172   0.074848515804228   0.071978372861988   0.069149254447863   0.066362860572328

  Columns 26 through 30

   0.063620912947592   0.060925168601948   0.058277433211614   0.055679572447018   0.053133519130552

  Columns 31 through 35

   0.050641273545164   0.048204893925462   0.045826474153937   0.043508106146153   0.041251825494136

  Columns 36 through 40

   0.039059540716975   0.036932948851265   0.034873442791226   0.032882018237401   0.030959189702521

  Columns 41 through 45

   0.029104925210620   0.027318607877193   0.025599029694217   0.023944419214671   0.022352501321462

  Columns 46 through 50

   0.020820584712800   0.019345671699460   0.017924585588780   0.016554113231756   0.015231163937115

  Columns 51 through 55

   0.013952950258553   0.012717199216756   0.011522398567352                   0                   0

  Columns 56 through 60

                   0                   0                   0                   0                   0

  Column 61

                   0


inner_code_BER =

  Columns 1 through 5

   0.141500879323390   0.138175148203252   0.134853729924419   0.131538204629457   0.128230195980865

  Columns 6 through 10

   0.124931368648881   0.121643425202649   0.118368102385146   0.115107166774748   0.111862409864375

  Columns 11 through 15

   0.108635642622936   0.105428689642400   0.102243383016212   0.099081556139248   0.095945037663722

  Columns 16 through 20

   0.092835645886779   0.089755183880390   0.086705435699124   0.083688164011978   0.080705109496172

  Columns 21 through 25

   0.077757992298171   0.074848515804224   0.071978372861975   0.069149254447826   0.066362860572218

  Columns 26 through 30

   0.063620912947282   0.060925168601093   0.058277433209333   0.055679572441115   0.053133519115760

  Columns 31 through 35

   0.050641273509265   0.048204893841108   0.045826473962106   0.043508105724145   0.041251824596544

  Columns 36 through 40

   0.039059538872333   0.036932945191269   0.034873435786890   0.032882005324372   0.030959166809029

  Columns 41 through 45

   0.029104886279504   0.027318544637929   0.025598932261282   0.023944278684672   0.022352316615588

  Columns 46 through 50

   0.020820377791481   0.019345518463543   0.017924674983597   0.016554855176389   0.015233378598917

  Columns 51 through 55

   0.013958187216692   0.012728253696597   0.011544107364861   0.010408455762738                   0

  Columns 56 through 60

                   0                   0                   0                   0                   0

  Column 61

                   0


outer_code_BER =

  Columns 1 through 5

   0.141500879323390   0.138175148203252   0.134853729924419   0.131538204629458   0.128230195980865

  Columns 6 through 10

   0.124931368648882   0.121643425202650   0.118368102385146   0.115107166774749   0.111862409864376

  Columns 11 through 15

   0.108635642622937   0.105428689642400   0.102243383016213   0.099081556139249   0.095945037663722

  Columns 16 through 20

   0.092835645886779   0.089755183880391   0.086705435699124   0.083688164011980   0.080705109496172

  Columns 21 through 25

   0.077757992298172   0.074848515804228   0.071978372861988   0.069149254447863   0.066362860572328

  Columns 26 through 30

   0.063620912947592   0.060925168601948   0.058277433211614   0.055679572447018   0.053133519130552

  Columns 31 through 35

   0.050641273545164   0.048204893925462   0.045826474153937   0.043508106146153   0.041251825494136

  Columns 36 through 40

   0.039059540716975   0.036932948851265   0.034873442791226   0.032882018237401   0.030959189702521

  Columns 41 through 45

   0.029104925210620   0.027318607877193   0.025599029694217   0.023944419214671   0.022352501321462

  Columns 46 through 50

   0.020820584712800   0.019345671699460   0.017924585588780   0.016554113231756   0.015231163937115

  Columns 51 through 55

   0.013952950258553   0.012717199216756   0.011522398567352   0.010368057142002                   0

  Columns 56 through 60

                   0                   0                   0                   0                   0

  Column 61

                   0


inner_code_BER =

  Columns 1 through 5

   0.141500879323390   0.138175148203252   0.134853729924419   0.131538204629457   0.128230195980865

  Columns 6 through 10

   0.124931368648881   0.121643425202649   0.118368102385146   0.115107166774748   0.111862409864375

  Columns 11 through 15

   0.108635642622936   0.105428689642400   0.102243383016212   0.099081556139248   0.095945037663722

  Columns 16 through 20

   0.092835645886779   0.089755183880390   0.086705435699124   0.083688164011978   0.080705109496172

  Columns 21 through 25

   0.077757992298171   0.074848515804224   0.071978372861975   0.069149254447826   0.066362860572218

  Columns 26 through 30

   0.063620912947282   0.060925168601093   0.058277433209333   0.055679572441115   0.053133519115760

  Columns 31 through 35

   0.050641273509265   0.048204893841108   0.045826473962106   0.043508105724145   0.041251824596544

  Columns 36 through 40

   0.039059538872333   0.036932945191269   0.034873435786890   0.032882005324372   0.030959166809029

  Columns 41 through 45

   0.029104886279504   0.027318544637929   0.025598932261282   0.023944278684672   0.022352316615588

  Columns 46 through 50

   0.020820377791481   0.019345518463543   0.017924674983597   0.016554855176389   0.015233378598917

  Columns 51 through 55

   0.013958187216692   0.012728253696597   0.011544107364861   0.010408455762738   0.009326767069111

  Columns 56 through 60

                   0                   0                   0                   0                   0

  Column 61

                   0


outer_code_BER =

  Columns 1 through 5

   0.141500879323390   0.138175148203252   0.134853729924419   0.131538204629458   0.128230195980865

  Columns 6 through 10

   0.124931368648882   0.121643425202650   0.118368102385146   0.115107166774749   0.111862409864376

  Columns 11 through 15

   0.108635642622937   0.105428689642400   0.102243383016213   0.099081556139249   0.095945037663722

  Columns 16 through 20

   0.092835645886779   0.089755183880391   0.086705435699124   0.083688164011980   0.080705109496172

  Columns 21 through 25

   0.077757992298172   0.074848515804228   0.071978372861988   0.069149254447863   0.066362860572328

  Columns 26 through 30

   0.063620912947592   0.060925168601948   0.058277433211614   0.055679572447018   0.053133519130552

  Columns 31 through 35

   0.050641273545164   0.048204893925462   0.045826474153937   0.043508106146153   0.041251825494136

  Columns 36 through 40

   0.039059540716975   0.036932948851265   0.034873442791226   0.032882018237401   0.030959189702521

  Columns 41 through 45

   0.029104925210620   0.027318607877193   0.025599029694217   0.023944419214671   0.022352501321462

  Columns 46 through 50

   0.020820584712800   0.019345671699460   0.017924585588780   0.016554113231756   0.015231163937115

  Columns 51 through 55

   0.013952950258553   0.012717199216756   0.011522398567352   0.010368057142002   0.009254882431639

  Columns 56 through 60

                   0                   0                   0                   0                   0

  Column 61

                   0


inner_code_BER =

  Columns 1 through 5

   0.141500879323390   0.138175148203252   0.134853729924419   0.131538204629457   0.128230195980865

  Columns 6 through 10

   0.124931368648881   0.121643425202649   0.118368102385146   0.115107166774748   0.111862409864375

  Columns 11 through 15

   0.108635642622936   0.105428689642400   0.102243383016212   0.099081556139248   0.095945037663722

  Columns 16 through 20

   0.092835645886779   0.089755183880390   0.086705435699124   0.083688164011978   0.080705109496172

  Columns 21 through 25

   0.077757992298171   0.074848515804224   0.071978372861975   0.069149254447826   0.066362860572218

  Columns 26 through 30

   0.063620912947282   0.060925168601093   0.058277433209333   0.055679572441115   0.053133519115760

  Columns 31 through 35

   0.050641273509265   0.048204893841108   0.045826473962106   0.043508105724145   0.041251824596544

  Columns 36 through 40

   0.039059538872333   0.036932945191269   0.034873435786890   0.032882005324372   0.030959166809029

  Columns 41 through 45

   0.029104886279504   0.027318544637929   0.025598932261282   0.023944278684672   0.022352316615588

  Columns 46 through 50

   0.020820377791481   0.019345518463543   0.017924674983597   0.016554855176389   0.015233378598917

  Columns 51 through 55

   0.013958187216692   0.012728253696597   0.011544107364861   0.010408455762738   0.009326767069111

  Columns 56 through 60

   0.008307474692038                   0                   0                   0                   0

  Column 61

                   0


outer_code_BER =

  Columns 1 through 5

   0.141500879323390   0.138175148203252   0.134853729924419   0.131538204629458   0.128230195980865

  Columns 6 through 10

   0.124931368648882   0.121643425202650   0.118368102385146   0.115107166774749   0.111862409864376

  Columns 11 through 15

   0.108635642622937   0.105428689642400   0.102243383016213   0.099081556139249   0.095945037663722

  Columns 16 through 20

   0.092835645886779   0.089755183880391   0.086705435699124   0.083688164011980   0.080705109496172

  Columns 21 through 25

   0.077757992298172   0.074848515804228   0.071978372861988   0.069149254447863   0.066362860572328

  Columns 26 through 30

   0.063620912947592   0.060925168601948   0.058277433211614   0.055679572447018   0.053133519130552

  Columns 31 through 35

   0.050641273545164   0.048204893925462   0.045826474153937   0.043508106146153   0.041251825494136

  Columns 36 through 40

   0.039059540716975   0.036932948851265   0.034873442791226   0.032882018237401   0.030959189702521

  Columns 41 through 45

   0.029104925210620   0.027318607877193   0.025599029694217   0.023944419214671   0.022352501321462

  Columns 46 through 50

   0.020820584712800   0.019345671699460   0.017924585588780   0.016554113231756   0.015231163937115

  Columns 51 through 55

   0.013952950258553   0.012717199216756   0.011522398567352   0.010368057142002   0.009254882431639

  Columns 56 through 60

   0.008184618137084                   0                   0                   0                   0

  Column 61

                   0


inner_code_BER =

  Columns 1 through 5

   0.141500879323390   0.138175148203252   0.134853729924419   0.131538204629457   0.128230195980865

  Columns 6 through 10

   0.124931368648881   0.121643425202649   0.118368102385146   0.115107166774748   0.111862409864375

  Columns 11 through 15

   0.108635642622936   0.105428689642400   0.102243383016212   0.099081556139248   0.095945037663722

  Columns 16 through 20

   0.092835645886779   0.089755183880390   0.086705435699124   0.083688164011978   0.080705109496172

  Columns 21 through 25

   0.077757992298171   0.074848515804224   0.071978372861975   0.069149254447826   0.066362860572218

  Columns 26 through 30

   0.063620912947282   0.060925168601093   0.058277433209333   0.055679572441115   0.053133519115760

  Columns 31 through 35

   0.050641273509265   0.048204893841108   0.045826473962106   0.043508105724145   0.041251824596544

  Columns 36 through 40

   0.039059538872333   0.036932945191269   0.034873435786890   0.032882005324372   0.030959166809029

  Columns 41 through 45

   0.029104886279504   0.027318544637929   0.025598932261282   0.023944278684672   0.022352316615588

  Columns 46 through 50

   0.020820377791481   0.019345518463543   0.017924674983597   0.016554855176389   0.015233378598917

  Columns 51 through 55

   0.013958187216692   0.012728253696597   0.011544107364861   0.010408455762738   0.009326767069111

  Columns 56 through 60

   0.008307474692038   0.007361262689947                   0                   0                   0

  Column 61

                   0


outer_code_BER =

  Columns 1 through 5

   0.141500879323390   0.138175148203252   0.134853729924419   0.131538204629458   0.128230195980865

  Columns 6 through 10

   0.124931368648882   0.121643425202650   0.118368102385146   0.115107166774749   0.111862409864376

  Columns 11 through 15

   0.108635642622937   0.105428689642400   0.102243383016213   0.099081556139249   0.095945037663722

  Columns 16 through 20

   0.092835645886779   0.089755183880391   0.086705435699124   0.083688164011980   0.080705109496172

  Columns 21 through 25

   0.077757992298172   0.074848515804228   0.071978372861988   0.069149254447863   0.066362860572328

  Columns 26 through 30

   0.063620912947592   0.060925168601948   0.058277433211614   0.055679572447018   0.053133519130552

  Columns 31 through 35

   0.050641273545164   0.048204893925462   0.045826474153937   0.043508106146153   0.041251825494136

  Columns 36 through 40

   0.039059540716975   0.036932948851265   0.034873442791226   0.032882018237401   0.030959189702521

  Columns 41 through 45

   0.029104925210620   0.027318607877193   0.025599029694217   0.023944419214671   0.022352501321462

  Columns 46 through 50

   0.020820584712800   0.019345671699460   0.017924585588780   0.016554113231756   0.015231163937115

  Columns 51 through 55

   0.013952950258553   0.012717199216756   0.011522398567352   0.010368057142002   0.009254882431639

  Columns 56 through 60

   0.008184618137084   0.007159045383979                   0                   0                   0

  Column 61

                   0


inner_code_BER =

  Columns 1 through 5

   0.141500879323390   0.138175148203252   0.134853729924419   0.131538204629457   0.128230195980865

  Columns 6 through 10

   0.124931368648881   0.121643425202649   0.118368102385146   0.115107166774748   0.111862409864375

  Columns 11 through 15

   0.108635642622936   0.105428689642400   0.102243383016212   0.099081556139248   0.095945037663722

  Columns 16 through 20

   0.092835645886779   0.089755183880390   0.086705435699124   0.083688164011978   0.080705109496172

  Columns 21 through 25

   0.077757992298171   0.074848515804224   0.071978372861975   0.069149254447826   0.066362860572218

  Columns 26 through 30

   0.063620912947282   0.060925168601093   0.058277433209333   0.055679572441115   0.053133519115760

  Columns 31 through 35

   0.050641273509265   0.048204893841108   0.045826473962106   0.043508105724145   0.041251824596544

  Columns 36 through 40

   0.039059538872333   0.036932945191269   0.034873435786890   0.032882005324372   0.030959166809029

  Columns 41 through 45

   0.029104886279504   0.027318544637929   0.025598932261282   0.023944278684672   0.022352316615588

  Columns 46 through 50

   0.020820377791481   0.019345518463543   0.017924674983597   0.016554855176389   0.015233378598917

  Columns 51 through 55

   0.013958187216692   0.012728253696597   0.011544107364861   0.010408455762738   0.009326767069111

  Columns 56 through 60

   0.008307474692038   0.007361262689947   0.006499011992888                   0                   0

  Column 61

                   0


outer_code_BER =

  Columns 1 through 5

   0.141500879323390   0.138175148203252   0.134853729924419   0.131538204629458   0.128230195980865

  Columns 6 through 10

   0.124931368648882   0.121643425202650   0.118368102385146   0.115107166774749   0.111862409864376

  Columns 11 through 15

   0.108635642622937   0.105428689642400   0.102243383016213   0.099081556139249   0.095945037663722

  Columns 16 through 20

   0.092835645886779   0.089755183880391   0.086705435699124   0.083688164011980   0.080705109496172

  Columns 21 through 25

   0.077757992298172   0.074848515804228   0.071978372861988   0.069149254447863   0.066362860572328

  Columns 26 through 30

   0.063620912947592   0.060925168601948   0.058277433211614   0.055679572447018   0.053133519130552

  Columns 31 through 35

   0.050641273545164   0.048204893925462   0.045826474153937   0.043508106146153   0.041251825494136

  Columns 36 through 40

   0.039059540716975   0.036932948851265   0.034873442791226   0.032882018237401   0.030959189702521

  Columns 41 through 45

   0.029104925210620   0.027318607877193   0.025599029694217   0.023944419214671   0.022352501321462

  Columns 46 through 50

   0.020820584712800   0.019345671699460   0.017924585588780   0.016554113231756   0.015231163937115

  Columns 51 through 55

   0.013952950258553   0.012717199216756   0.011522398567352   0.010368057142002   0.009254882431639

  Columns 56 through 60

   0.008184618137084   0.007159045383979   0.006177414323091                   0                   0

  Column 61

                   0


inner_code_BER =

  Columns 1 through 5

   0.141500879323390   0.138175148203252   0.134853729924419   0.131538204629457   0.128230195980865

  Columns 6 through 10

   0.124931368648881   0.121643425202649   0.118368102385146   0.115107166774748   0.111862409864375

  Columns 11 through 15

   0.108635642622936   0.105428689642400   0.102243383016212   0.099081556139248   0.095945037663722

  Columns 16 through 20

   0.092835645886779   0.089755183880390   0.086705435699124   0.083688164011978   0.080705109496172

  Columns 21 through 25

   0.077757992298171   0.074848515804224   0.071978372861975   0.069149254447826   0.066362860572218

  Columns 26 through 30

   0.063620912947282   0.060925168601093   0.058277433209333   0.055679572441115   0.053133519115760

  Columns 31 through 35

   0.050641273509265   0.048204893841108   0.045826473962106   0.043508105724145   0.041251824596544

  Columns 36 through 40

   0.039059538872333   0.036932945191269   0.034873435786890   0.032882005324372   0.030959166809029

  Columns 41 through 45

   0.029104886279504   0.027318544637929   0.025598932261282   0.023944278684672   0.022352316615588

  Columns 46 through 50

   0.020820377791481   0.019345518463543   0.017924674983597   0.016554855176389   0.015233378598917

  Columns 51 through 55

   0.013958187216692   0.012728253696597   0.011544107364861   0.010408455762738   0.009326767069111

  Columns 56 through 60

   0.008307474692038   0.007361262689947   0.006499011992888   0.005728774526300                   0

  Column 61

                   0


outer_code_BER =

  Columns 1 through 5

   0.141500879323390   0.138175148203252   0.134853729924419   0.131538204629458   0.128230195980865

  Columns 6 through 10

   0.124931368648882   0.121643425202650   0.118368102385146   0.115107166774749   0.111862409864376

  Columns 11 through 15

   0.108635642622937   0.105428689642400   0.102243383016213   0.099081556139249   0.095945037663722

  Columns 16 through 20

   0.092835645886779   0.089755183880391   0.086705435699124   0.083688164011980   0.080705109496172

  Columns 21 through 25

   0.077757992298172   0.074848515804228   0.071978372861988   0.069149254447863   0.066362860572328

  Columns 26 through 30

   0.063620912947592   0.060925168601948   0.058277433211614   0.055679572447018   0.053133519130552

  Columns 31 through 35

   0.050641273545164   0.048204893925462   0.045826474153937   0.043508106146153   0.041251825494136

  Columns 36 through 40

   0.039059540716975   0.036932948851265   0.034873442791226   0.032882018237401   0.030959189702521

  Columns 41 through 45

   0.029104925210620   0.027318607877193   0.025599029694217   0.023944419214671   0.022352501321462

  Columns 46 through 50

   0.020820584712800   0.019345671699460   0.017924585588780   0.016554113231756   0.015231163937115

  Columns 51 through 55

   0.013952950258553   0.012717199216756   0.011522398567352   0.010368057142002   0.009254882431639

  Columns 56 through 60

   0.008184618137084   0.007159045383979   0.006177414323091   0.005231110354095                   0

  Column 61

                   0


inner_code_BER =

  Columns 1 through 5

   0.141500879323390   0.138175148203252   0.134853729924419   0.131538204629457   0.128230195980865

  Columns 6 through 10

   0.124931368648881   0.121643425202649   0.118368102385146   0.115107166774748   0.111862409864375

  Columns 11 through 15

   0.108635642622936   0.105428689642400   0.102243383016212   0.099081556139248   0.095945037663722

  Columns 16 through 20

   0.092835645886779   0.089755183880390   0.086705435699124   0.083688164011978   0.080705109496172

  Columns 21 through 25

   0.077757992298171   0.074848515804224   0.071978372861975   0.069149254447826   0.066362860572218

  Columns 26 through 30

   0.063620912947282   0.060925168601093   0.058277433209333   0.055679572441115   0.053133519115760

  Columns 31 through 35

   0.050641273509265   0.048204893841108   0.045826473962106   0.043508105724145   0.041251824596544

  Columns 36 through 40

   0.039059538872333   0.036932945191269   0.034873435786890   0.032882005324372   0.030959166809029

  Columns 41 through 45

   0.029104886279504   0.027318544637929   0.025598932261282   0.023944278684672   0.022352316615588

  Columns 46 through 50

   0.020820377791481   0.019345518463543   0.017924674983597   0.016554855176389   0.015233378598917

  Columns 51 through 55

   0.013958187216692   0.012728253696597   0.011544107364861   0.010408455762738   0.009326767069111

  Columns 56 through 60

   0.008307474692038   0.007361262689947   0.006499011992888   0.005728774526300   0.005053193687072

  Column 61

                   0


outer_code_BER =

  Columns 1 through 5

   0.141500879323390   0.138175148203252   0.134853729924419   0.131538204629458   0.128230195980865

  Columns 6 through 10

   0.124931368648882   0.121643425202650   0.118368102385146   0.115107166774749   0.111862409864376

  Columns 11 through 15

   0.108635642622937   0.105428689642400   0.102243383016213   0.099081556139249   0.095945037663722

  Columns 16 through 20

   0.092835645886779   0.089755183880391   0.086705435699124   0.083688164011980   0.080705109496172

  Columns 21 through 25

   0.077757992298172   0.074848515804228   0.071978372861988   0.069149254447863   0.066362860572328

  Columns 26 through 30

   0.063620912947592   0.060925168601948   0.058277433211614   0.055679572447018   0.053133519130552

  Columns 31 through 35

   0.050641273545164   0.048204893925462   0.045826474153937   0.043508106146153   0.041251825494136

  Columns 36 through 40

   0.039059540716975   0.036932948851265   0.034873442791226   0.032882018237401   0.030959189702521

  Columns 41 through 45

   0.029104925210620   0.027318607877193   0.025599029694217   0.023944419214671   0.022352501321462

  Columns 46 through 50

   0.020820584712800   0.019345671699460   0.017924585588780   0.016554113231756   0.015231163937115

  Columns 51 through 55

   0.013952950258553   0.012717199216756   0.011522398567352   0.010368057142002   0.009254882431639

  Columns 56 through 60

   0.008184618137084   0.007159045383979   0.006177414323091   0.005231110354095   0.004290589436586

  Column 61

                   0


inner_code_BER =

  Columns 1 through 5

   0.141500879323390   0.138175148203252   0.134853729924419   0.131538204629457   0.128230195980865

  Columns 6 through 10

   0.124931368648881   0.121643425202649   0.118368102385146   0.115107166774748   0.111862409864375

  Columns 11 through 15

   0.108635642622936   0.105428689642400   0.102243383016212   0.099081556139248   0.095945037663722

  Columns 16 through 20

   0.092835645886779   0.089755183880390   0.086705435699124   0.083688164011978   0.080705109496172

  Columns 21 through 25

   0.077757992298171   0.074848515804224   0.071978372861975   0.069149254447826   0.066362860572218

  Columns 26 through 30

   0.063620912947282   0.060925168601093   0.058277433209333   0.055679572441115   0.053133519115760

  Columns 31 through 35

   0.050641273509265   0.048204893841108   0.045826473962106   0.043508105724145   0.041251824596544

  Columns 36 through 40

   0.039059538872333   0.036932945191269   0.034873435786890   0.032882005324372   0.030959166809029

  Columns 41 through 45

   0.029104886279504   0.027318544637929   0.025598932261282   0.023944278684672   0.022352316615588

  Columns 46 through 50

   0.020820377791481   0.019345518463543   0.017924674983597   0.016554855176389   0.015233378598917

  Columns 51 through 55

   0.013958187216692   0.012728253696597   0.011544107364861   0.010408455762738   0.009326767069111

  Columns 56 through 60

   0.008307474692038   0.007361262689947   0.006499011992888   0.005728774526300   0.005053193687072

  Column 61

   0.004468840644932


outer_code_BER =

  Columns 1 through 5

   0.141500879323390   0.138175148203252   0.134853729924419   0.131538204629458   0.128230195980865

  Columns 6 through 10

   0.124931368648882   0.121643425202650   0.118368102385146   0.115107166774749   0.111862409864376

  Columns 11 through 15

   0.108635642622937   0.105428689642400   0.102243383016213   0.099081556139249   0.095945037663722

  Columns 16 through 20

   0.092835645886779   0.089755183880391   0.086705435699124   0.083688164011980   0.080705109496172

  Columns 21 through 25

   0.077757992298172   0.074848515804228   0.071978372861988   0.069149254447863   0.066362860572328

  Columns 26 through 30

   0.063620912947592   0.060925168601948   0.058277433211614   0.055679572447018   0.053133519130552

  Columns 31 through 35

   0.050641273545164   0.048204893925462   0.045826474153937   0.043508106146153   0.041251825494136

  Columns 36 through 40

   0.039059540716975   0.036932948851265   0.034873442791226   0.032882018237401   0.030959189702521

  Columns 41 through 45

   0.029104925210620   0.027318607877193   0.025599029694217   0.023944419214671   0.022352501321462

  Columns 46 through 50

   0.020820584712800   0.019345671699460   0.017924585588780   0.016554113231756   0.015231163937115

  Columns 51 through 55

   0.013952950258553   0.012717199216756   0.011522398567352   0.010368057142002   0.009254882431639

  Columns 56 through 60

   0.008184618137084   0.007159045383979   0.006177414323091   0.005231110354095   0.004290589436586

  Column 61

   0.003235571972020

Elapsed time is 50155.356332 seconds.
