# Supplementary material for: An Efficient Design of Systematic Rateless Codes
Source: Hindawi journal article supplement (doi:10.1155/2020/8068414), 2020-05-19
Supplement: f1 [file 8068414.f1.zip › supplementary files/Matlab_code_for_Figure1/BER_by_DDE/仿真结果/BER_by_DDE_rayl_rate_1_2_dist1_Ns.txt]

µ±Ç°ÐÅµÀÎªÈðÀûÐÅµÀ

EbN0indB_vec =

  Columns 1 through 5

                   0   0.100000000000000   0.200000000000000   0.300000000000000   0.400000000000000

  Columns 6 through 10

   0.500000000000000   0.600000000000000   0.700000000000000   0.800000000000000   0.900000000000000

  Columns 11 through 15

   1.000000000000000   1.100000000000000   1.200000000000000   1.300000000000000   1.400000000000000

  Columns 16 through 20

   1.500000000000000   1.600000000000000   1.700000000000000   1.800000000000000   1.900000000000000

  Columns 21 through 25

   2.000000000000000   2.100000000000000   2.200000000000000   2.300000000000000   2.400000000000000

  Columns 26 through 30

   2.500000000000000   2.600000000000000   2.700000000000000   2.800000000000000   2.900000000000000

  Columns 31 through 35

   3.000000000000000   3.100000000000000   3.200000000000000   3.300000000000000   3.400000000000000

  Columns 36 through 40

   3.500000000000000   3.600000000000000   3.700000000000000   3.800000000000000   3.900000000000000

  Columns 41 through 45

   4.000000000000000   4.100000000000000   4.200000000000000   4.300000000000000   4.400000000000000

  Columns 46 through 50

   4.500000000000000   4.600000000000000   4.700000000000000   4.800000000000000   4.900000000000000

  Columns 51 through 55

   5.000000000000000   5.100000000000000   5.200000000000000   5.300000000000000   5.400000000000000

  Columns 56 through 60

   5.500000000000000   5.600000000000000   5.700000000000000   5.800000000000000   5.900000000000000

  Column 61

   6.000000000000000

ÖÆ±í³É¹¦
µ±Ç°Ñ¡ÔñRaptorÂëµ±Ç°Ñ¡Ôñ·ÇÏµÍ³Âë
×ÜÂëÂÊ=0.50000, ÍâÂëÂëÂÊ=0.98039, ÄÚÂëÂëÂÊ=0.51000

out_node_index =

     1     2     3     4     5    11    40


ans =

  Columns 1 through 5

   0.009670000000000   0.450250000000000   0.209370000000000   0.023320000000000   0.147350000000000

  Columns 6 through 7

   0.112249000000000   0.047550000000000


ans =

  Columns 1 through 5

   0.009670000000000   0.450250000000000   0.209370000000000   0.023320000000000   0.147350000000000

  Columns 6 through 7

   0.112249000000000   0.047550000000000


inner_code_BER =

  Columns 1 through 5

   0.453077185414537                   0                   0                   0                   0

  Columns 6 through 10

                   0                   0                   0                   0                   0

  Columns 11 through 15

                   0                   0                   0                   0                   0

  Columns 16 through 20

                   0                   0                   0                   0                   0

  Columns 21 through 25

                   0                   0                   0                   0                   0

  Columns 26 through 30

                   0                   0                   0                   0                   0

  Columns 31 through 35

                   0                   0                   0                   0                   0

  Columns 36 through 40

                   0                   0                   0                   0                   0

  Columns 41 through 45

                   0                   0                   0                   0                   0

  Columns 46 through 50

                   0                   0                   0                   0                   0

  Columns 51 through 55

                   0                   0                   0                   0                   0

  Columns 56 through 60

                   0                   0                   0                   0                   0

  Column 61

                   0


outer_code_BER =

  Columns 1 through 5

   0.453077185414538                   0                   0                   0                   0

  Columns 6 through 10

                   0                   0                   0                   0                   0

  Columns 11 through 15

                   0                   0                   0                   0                   0

  Columns 16 through 20

                   0                   0                   0                   0                   0

  Columns 21 through 25

                   0                   0                   0                   0                   0

  Columns 26 through 30

                   0                   0                   0                   0                   0

  Columns 31 through 35

                   0                   0                   0                   0                   0

  Columns 36 through 40

                   0                   0                   0                   0                   0

  Columns 41 through 45

                   0                   0                   0                   0                   0

  Columns 46 through 50

                   0                   0                   0                   0                   0

  Columns 51 through 55

                   0                   0                   0                   0                   0

  Columns 56 through 60

                   0                   0                   0                   0                   0

  Column 61

                   0


inner_code_BER =

  Columns 1 through 5

   0.453077185414537   0.450784504721612                   0                   0                   0

  Columns 6 through 10

                   0                   0                   0                   0                   0

  Columns 11 through 15

                   0                   0                   0                   0                   0

  Columns 16 through 20

                   0                   0                   0                   0                   0

  Columns 21 through 25

                   0                   0                   0                   0                   0

  Columns 26 through 30

                   0                   0                   0                   0                   0

  Columns 31 through 35

                   0                   0                   0                   0                   0

  Columns 36 through 40

                   0                   0                   0                   0                   0

  Columns 41 through 45

                   0                   0                   0                   0                   0

  Columns 46 through 50

                   0                   0                   0                   0                   0

  Columns 51 through 55

                   0                   0                   0                   0                   0

  Columns 56 through 60

                   0                   0                   0                   0                   0

  Column 61

                   0


outer_code_BER =

  Columns 1 through 5

   0.453077185414538   0.450784504721612                   0                   0                   0

  Columns 6 through 10

                   0                   0                   0                   0                   0

  Columns 11 through 15

                   0                   0                   0                   0                   0

  Columns 16 through 20

                   0                   0                   0                   0                   0

  Columns 21 through 25

                   0                   0                   0                   0                   0

  Columns 26 through 30

                   0                   0                   0                   0                   0

  Columns 31 through 35

                   0                   0                   0                   0                   0

  Columns 36 through 40

                   0                   0                   0                   0                   0

  Columns 41 through 45

                   0                   0                   0                   0                   0

  Columns 46 through 50

                   0                   0                   0                   0                   0

  Columns 51 through 55

                   0                   0                   0                   0                   0

  Columns 56 through 60

                   0                   0                   0                   0                   0

  Column 61

                   0


inner_code_BER =

  Columns 1 through 5

   0.453077185414537   0.450784504721612   0.448323653110363                   0                   0

  Columns 6 through 10

                   0                   0                   0                   0                   0

  Columns 11 through 15

                   0                   0                   0                   0                   0

  Columns 16 through 20

                   0                   0                   0                   0                   0

  Columns 21 through 25

                   0                   0                   0                   0                   0

  Columns 26 through 30

                   0                   0                   0                   0                   0

  Columns 31 through 35

                   0                   0                   0                   0                   0

  Columns 36 through 40

                   0                   0                   0                   0                   0

  Columns 41 through 45

                   0                   0                   0                   0                   0

  Columns 46 through 50

                   0                   0                   0                   0                   0

  Columns 51 through 55

                   0                   0                   0                   0                   0

  Columns 56 through 60

                   0                   0                   0                   0                   0

  Column 61

                   0


outer_code_BER =

  Columns 1 through 5

   0.453077185414538   0.450784504721612   0.448323653110363                   0                   0

  Columns 6 through 10

                   0                   0                   0                   0                   0

  Columns 11 through 15

                   0                   0                   0                   0                   0

  Columns 16 through 20

                   0                   0                   0                   0                   0

  Columns 21 through 25

                   0                   0                   0                   0                   0

  Columns 26 through 30

                   0                   0                   0                   0                   0

  Columns 31 through 35

                   0                   0                   0                   0                   0

  Columns 36 through 40

                   0                   0                   0                   0                   0

  Columns 41 through 45

                   0                   0                   0                   0                   0

  Columns 46 through 50

                   0                   0                   0                   0                   0

  Columns 51 through 55

                   0                   0                   0                   0                   0

  Columns 56 through 60

                   0                   0                   0                   0                   0

  Column 61

                   0


inner_code_BER =

  Columns 1 through 5

   0.453077185414537   0.450784504721612   0.448323653110363   0.445675208332341                   0

  Columns 6 through 10

                   0                   0                   0                   0                   0

  Columns 11 through 15

                   0                   0                   0                   0                   0

  Columns 16 through 20

                   0                   0                   0                   0                   0

  Columns 21 through 25

                   0                   0                   0                   0                   0

  Columns 26 through 30

                   0                   0                   0                   0                   0

  Columns 31 through 35

                   0                   0                   0                   0                   0

  Columns 36 through 40

                   0                   0                   0                   0                   0

  Columns 41 through 45

                   0                   0                   0                   0                   0

  Columns 46 through 50

                   0                   0                   0                   0                   0

  Columns 51 through 55

                   0                   0                   0                   0                   0

  Columns 56 through 60

                   0                   0                   0                   0                   0

  Column 61

                   0


outer_code_BER =

  Columns 1 through 5

   0.453077185414538   0.450784504721612   0.448323653110363   0.445675208332342                   0

  Columns 6 through 10

                   0                   0                   0                   0                   0

  Columns 11 through 15

                   0                   0                   0                   0                   0

  Columns 16 through 20

                   0                   0                   0                   0                   0

  Columns 21 through 25

                   0                   0                   0                   0                   0

  Columns 26 through 30

                   0                   0                   0                   0                   0

  Columns 31 through 35

                   0                   0                   0                   0                   0

  Columns 36 through 40

                   0                   0                   0                   0                   0

  Columns 41 through 45

                   0                   0                   0                   0                   0

  Columns 46 through 50

                   0                   0                   0                   0                   0

  Columns 51 through 55

                   0                   0                   0                   0                   0

  Columns 56 through 60

                   0                   0                   0                   0                   0

  Column 61

                   0


inner_code_BER =

  Columns 1 through 5

   0.453077185414537   0.450784504721612   0.448323653110363   0.445675208332341   0.442816225411191

  Columns 6 through 10

                   0                   0                   0                   0                   0

  Columns 11 through 15

                   0                   0                   0                   0                   0

  Columns 16 through 20

                   0                   0                   0                   0                   0

  Columns 21 through 25

                   0                   0                   0                   0                   0

  Columns 26 through 30

                   0                   0                   0                   0                   0

  Columns 31 through 35

                   0                   0                   0                   0                   0

  Columns 36 through 40

                   0                   0                   0                   0                   0

  Columns 41 through 45

                   0                   0                   0                   0                   0

  Columns 46 through 50

                   0                   0                   0                   0                   0

  Columns 51 through 55

                   0                   0                   0                   0                   0

  Columns 56 through 60

                   0                   0                   0                   0                   0

  Column 61

                   0


outer_code_BER =

  Columns 1 through 5

   0.453077185414538   0.450784504721612   0.448323653110363   0.445675208332342   0.442816225411191

  Columns 6 through 10

                   0                   0                   0                   0                   0

  Columns 11 through 15

                   0                   0                   0                   0                   0

  Columns 16 through 20

                   0                   0                   0                   0                   0

  Columns 21 through 25

                   0                   0                   0                   0                   0

  Columns 26 through 30

                   0                   0                   0                   0                   0

  Columns 31 through 35

                   0                   0                   0                   0                   0

  Columns 36 through 40

                   0                   0                   0                   0                   0

  Columns 41 through 45

                   0                   0                   0                   0                   0

  Columns 46 through 50

                   0                   0                   0                   0                   0

  Columns 51 through 55

                   0                   0                   0                   0                   0

  Columns 56 through 60

                   0                   0                   0                   0                   0

  Column 61

                   0


inner_code_BER =

  Columns 1 through 5

   0.453077185414537   0.450784504721612   0.448323653110363   0.445675208332341   0.442816225411191

  Columns 6 through 10

   0.439719329734277                   0                   0                   0                   0

  Columns 11 through 15

                   0                   0                   0                   0                   0

  Columns 16 through 20

                   0                   0                   0                   0                   0

  Columns 21 through 25

                   0                   0                   0                   0                   0

  Columns 26 through 30

                   0                   0                   0                   0                   0

  Columns 31 through 35

                   0                   0                   0                   0                   0

  Columns 36 through 40

                   0                   0                   0                   0                   0

  Columns 41 through 45

                   0                   0                   0                   0                   0

  Columns 46 through 50

                   0                   0                   0                   0                   0

  Columns 51 through 55

                   0                   0                   0                   0                   0

  Columns 56 through 60

                   0                   0                   0                   0                   0

  Column 61

                   0


outer_code_BER =

  Columns 1 through 5

   0.453077185414538   0.450784504721612   0.448323653110363   0.445675208332342   0.442816225411191

  Columns 6 through 10

   0.439719329734278                   0                   0                   0                   0

  Columns 11 through 15

                   0                   0                   0                   0                   0

  Columns 16 through 20

                   0                   0                   0                   0                   0

  Columns 21 through 25

                   0                   0                   0                   0                   0

  Columns 26 through 30

                   0                   0                   0                   0                   0

  Columns 31 through 35

                   0                   0                   0                   0                   0

  Columns 36 through 40

                   0                   0                   0                   0                   0

  Columns 41 through 45

                   0                   0                   0                   0                   0

  Columns 46 through 50

                   0                   0                   0                   0                   0

  Columns 51 through 55

                   0                   0                   0                   0                   0

  Columns 56 through 60

                   0                   0                   0                   0                   0

  Column 61

                   0


inner_code_BER =

  Columns 1 through 5

   0.453077185414537   0.450784504721612   0.448323653110363   0.445675208332341   0.442816225411191

  Columns 6 through 10

   0.439719329734277   0.436351504531017                   0                   0                   0

  Columns 11 through 15

                   0                   0                   0                   0                   0

  Columns 16 through 20

                   0                   0                   0                   0                   0

  Columns 21 through 25

                   0                   0                   0                   0                   0

  Columns 26 through 30

                   0                   0                   0                   0                   0

  Columns 31 through 35

                   0                   0                   0                   0                   0

  Columns 36 through 40

                   0                   0                   0                   0                   0

  Columns 41 through 45

                   0                   0                   0                   0                   0

  Columns 46 through 50

                   0                   0                   0                   0                   0

  Columns 51 through 55

                   0                   0                   0                   0                   0

  Columns 56 through 60

                   0                   0                   0                   0                   0

  Column 61

                   0


outer_code_BER =

  Columns 1 through 5

   0.453077185414538   0.450784504721612   0.448323653110363   0.445675208332342   0.442816225411191

  Columns 6 through 10

   0.439719329734278   0.436351504531018                   0                   0                   0

  Columns 11 through 15

                   0                   0                   0                   0                   0

  Columns 16 through 20

                   0                   0                   0                   0                   0

  Columns 21 through 25

                   0                   0                   0                   0                   0

  Columns 26 through 30

                   0                   0                   0                   0                   0

  Columns 31 through 35

                   0                   0                   0                   0                   0

  Columns 36 through 40

                   0                   0                   0                   0                   0

  Columns 41 through 45

                   0                   0                   0                   0                   0

  Columns 46 through 50

                   0                   0                   0                   0                   0

  Columns 51 through 55

                   0                   0                   0                   0                   0

  Columns 56 through 60

                   0                   0                   0                   0                   0

  Column 61

                   0


inner_code_BER =

  Columns 1 through 5

   0.453077185414537   0.450784504721612   0.448323653110363   0.445675208332341   0.442816225411191

  Columns 6 through 10

   0.439719329734277   0.436351504531017   0.432672442603720                   0                   0

  Columns 11 through 15

                   0                   0                   0                   0                   0

  Columns 16 through 20

                   0                   0                   0                   0                   0

  Columns 21 through 25

                   0                   0                   0                   0                   0

  Columns 26 through 30

                   0                   0                   0                   0                   0

  Columns 31 through 35

                   0                   0                   0                   0                   0

  Columns 36 through 40

                   0                   0                   0                   0                   0

  Columns 41 through 45

                   0                   0                   0                   0                   0

  Columns 46 through 50

                   0                   0                   0                   0                   0

  Columns 51 through 55

                   0                   0                   0                   0                   0

  Columns 56 through 60

                   0                   0                   0                   0                   0

  Column 61

                   0


outer_code_BER =

  Columns 1 through 5

   0.453077185414538   0.450784504721612   0.448323653110363   0.445675208332342   0.442816225411191

  Columns 6 through 10

   0.439719329734278   0.436351504531018   0.432672442603720                   0                   0

  Columns 11 through 15

                   0                   0                   0                   0                   0

  Columns 16 through 20

                   0                   0                   0                   0                   0

  Columns 21 through 25

                   0                   0                   0                   0                   0

  Columns 26 through 30

                   0                   0                   0                   0                   0

  Columns 31 through 35

                   0                   0                   0                   0                   0

  Columns 36 through 40

                   0                   0                   0                   0                   0

  Columns 41 through 45

                   0                   0                   0                   0                   0

  Columns 46 through 50

                   0                   0                   0                   0                   0

  Columns 51 through 55

                   0                   0                   0                   0                   0

  Columns 56 through 60

                   0                   0                   0                   0                   0

  Column 61

                   0


inner_code_BER =

  Columns 1 through 5

   0.453077185414537   0.450784504721612   0.448323653110363   0.445675208332341   0.442816225411191

  Columns 6 through 10

   0.439719329734277   0.436351504531017   0.432672442603720   0.428632263229845                   0

  Columns 11 through 15

                   0                   0                   0                   0                   0

  Columns 16 through 20

                   0                   0                   0                   0                   0

  Columns 21 through 25

                   0                   0                   0                   0                   0

  Columns 26 through 30

                   0                   0                   0                   0                   0

  Columns 31 through 35

                   0                   0                   0                   0                   0

  Columns 36 through 40

                   0                   0                   0                   0                   0

  Columns 41 through 45

                   0                   0                   0                   0                   0

  Columns 46 through 50

                   0                   0                   0                   0                   0

  Columns 51 through 55

                   0                   0                   0                   0                   0

  Columns 56 through 60

                   0                   0                   0                   0                   0

  Column 61

                   0


outer_code_BER =

  Columns 1 through 5

   0.453077185414538   0.450784504721612   0.448323653110363   0.445675208332342   0.442816225411191

  Columns 6 through 10

   0.439719329734278   0.436351504531018   0.432672442603720   0.428632263229845                   0

  Columns 11 through 15

                   0                   0                   0                   0                   0

  Columns 16 through 20

                   0                   0                   0                   0                   0

  Columns 21 through 25

                   0                   0                   0                   0                   0

  Columns 26 through 30

                   0                   0                   0                   0                   0

  Columns 31 through 35

                   0                   0                   0                   0                   0

  Columns 36 through 40

                   0                   0                   0                   0                   0

  Columns 41 through 45

                   0                   0                   0                   0                   0

  Columns 46 through 50

                   0                   0                   0                   0                   0

  Columns 51 through 55

                   0                   0                   0                   0                   0

  Columns 56 through 60

                   0                   0                   0                   0                   0

  Column 61

                   0


inner_code_BER =

  Columns 1 through 5

   0.453077185414537   0.450784504721612   0.448323653110363   0.445675208332341   0.442816225411191

  Columns 6 through 10

   0.439719329734277   0.436351504531017   0.432672442603720   0.428632263229845   0.424168281132739

  Columns 11 through 15

                   0                   0                   0                   0                   0

  Columns 16 through 20

                   0                   0                   0                   0                   0

  Columns 21 through 25

                   0                   0                   0                   0                   0

  Columns 26 through 30

                   0                   0                   0                   0                   0

  Columns 31 through 35

                   0                   0                   0                   0                   0

  Columns 36 through 40

                   0                   0                   0                   0                   0

  Columns 41 through 45

                   0                   0                   0                   0                   0

  Columns 46 through 50

                   0                   0                   0                   0                   0

  Columns 51 through 55

                   0                   0                   0                   0                   0

  Columns 56 through 60

                   0                   0                   0                   0                   0

  Column 61

                   0


outer_code_BER =

  Columns 1 through 5

   0.453077185414538   0.450784504721612   0.448323653110363   0.445675208332342   0.442816225411191

  Columns 6 through 10

   0.439719329734278   0.436351504531018   0.432672442603720   0.428632263229845   0.424168281132740

  Columns 11 through 15

                   0                   0                   0                   0                   0

  Columns 16 through 20

                   0                   0                   0                   0                   0

  Columns 21 through 25

                   0                   0                   0                   0                   0

  Columns 26 through 30

                   0                   0                   0                   0                   0

  Columns 31 through 35

                   0                   0                   0                   0                   0

  Columns 36 through 40

                   0                   0                   0                   0                   0

  Columns 41 through 45

                   0                   0                   0                   0                   0

  Columns 46 through 50

                   0                   0                   0                   0                   0

  Columns 51 through 55

                   0                   0                   0                   0                   0

  Columns 56 through 60

                   0                   0                   0                   0                   0

  Column 61

                   0


inner_code_BER =

  Columns 1 through 5

   0.453077185414537   0.450784504721612   0.448323653110363   0.445675208332341   0.442816225411191

  Columns 6 through 10

   0.439719329734277   0.436351504531017   0.432672442603720   0.428632263229845   0.424168281132739

  Columns 11 through 15

   0.419200319116889                   0                   0                   0                   0

  Columns 16 through 20

                   0                   0                   0                   0                   0

  Columns 21 through 25

                   0                   0                   0                   0                   0

  Columns 26 through 30

                   0                   0                   0                   0                   0

  Columns 31 through 35

                   0                   0                   0                   0                   0

  Columns 36 through 40

                   0                   0                   0                   0                   0

  Columns 41 through 45

                   0                   0                   0                   0                   0

  Columns 46 through 50

                   0                   0                   0                   0                   0

  Columns 51 through 55

                   0                   0                   0                   0                   0

  Columns 56 through 60

                   0                   0                   0                   0                   0

  Column 61

                   0


outer_code_BER =

  Columns 1 through 5

   0.453077185414538   0.450784504721612   0.448323653110363   0.445675208332342   0.442816225411191

  Columns 6 through 10

   0.439719329734278   0.436351504531018   0.432672442603720   0.428632263229845   0.424168281132740

  Columns 11 through 15

   0.419200319116889                   0                   0                   0                   0

  Columns 16 through 20

                   0                   0                   0                   0                   0

  Columns 21 through 25

                   0                   0                   0                   0                   0

  Columns 26 through 30

                   0                   0                   0                   0                   0

  Columns 31 through 35

                   0                   0                   0                   0                   0

  Columns 36 through 40

                   0                   0                   0                   0                   0

  Columns 41 through 45

                   0                   0                   0                   0                   0

  Columns 46 through 50

                   0                   0                   0                   0                   0

  Columns 51 through 55

                   0                   0                   0                   0                   0

  Columns 56 through 60

                   0                   0                   0                   0                   0

  Column 61

                   0


inner_code_BER =

  Columns 1 through 5

   0.453077185414537   0.450784504721612   0.448323653110363   0.445675208332341   0.442816225411191

  Columns 6 through 10

   0.439719329734277   0.436351504531017   0.432672442603720   0.428632263229845   0.424168281132739

  Columns 11 through 15

   0.419200319116889   0.413623707462851                   0                   0                   0

  Columns 16 through 20

                   0                   0                   0                   0                   0

  Columns 21 through 25

                   0                   0                   0                   0                   0

  Columns 26 through 30

                   0                   0                   0                   0                   0

  Columns 31 through 35

                   0                   0                   0                   0                   0

  Columns 36 through 40

                   0                   0                   0                   0                   0

  Columns 41 through 45

                   0                   0                   0                   0                   0

  Columns 46 through 50

                   0                   0                   0                   0                   0

  Columns 51 through 55

                   0                   0                   0                   0                   0

  Columns 56 through 60

                   0                   0                   0                   0                   0

  Column 61

                   0


outer_code_BER =

  Columns 1 through 5

   0.453077185414538   0.450784504721612   0.448323653110363   0.445675208332342   0.442816225411191

  Columns 6 through 10

   0.439719329734278   0.436351504531018   0.432672442603720   0.428632263229845   0.424168281132740

  Columns 11 through 15

   0.419200319116889   0.413623707462851                   0                   0                   0

  Columns 16 through 20

                   0                   0                   0                   0                   0

  Columns 21 through 25

                   0                   0                   0                   0                   0

  Columns 26 through 30

                   0                   0                   0                   0                   0

  Columns 31 through 35

                   0                   0                   0                   0                   0

  Columns 36 through 40

                   0                   0                   0                   0                   0

  Columns 41 through 45

                   0                   0                   0                   0                   0

  Columns 46 through 50

                   0                   0                   0                   0                   0

  Columns 51 through 55

                   0                   0                   0                   0                   0

  Columns 56 through 60

                   0                   0                   0                   0                   0

  Column 61

                   0


inner_code_BER =

  Columns 1 through 5

   0.453077185414537   0.450784504721612   0.448323653110363   0.445675208332341   0.442816225411191

  Columns 6 through 10

   0.439719329734277   0.436351504531017   0.432672442603720   0.428632263229845   0.424168281132739

  Columns 11 through 15

   0.419200319116889   0.413623707462851   0.407298460396732                   0                   0

  Columns 16 through 20

                   0                   0                   0                   0                   0

  Columns 21 through 25

                   0                   0                   0                   0                   0

  Columns 26 through 30

                   0                   0                   0                   0                   0

  Columns 31 through 35

                   0                   0                   0                   0                   0

  Columns 36 through 40

                   0                   0                   0                   0                   0

  Columns 41 through 45

                   0                   0                   0                   0                   0

  Columns 46 through 50

                   0                   0                   0                   0                   0

  Columns 51 through 55

                   0                   0                   0                   0                   0

  Columns 56 through 60

                   0                   0                   0                   0                   0

  Column 61

                   0


outer_code_BER =

  Columns 1 through 5

   0.453077185414538   0.450784504721612   0.448323653110363   0.445675208332342   0.442816225411191

  Columns 6 through 10

   0.439719329734278   0.436351504531018   0.432672442603720   0.428632263229845   0.424168281132740

  Columns 11 through 15

   0.419200319116889   0.413623707462851   0.407298460396732                   0                   0

  Columns 16 through 20

                   0                   0                   0                   0                   0

  Columns 21 through 25

                   0                   0                   0                   0                   0

  Columns 26 through 30

                   0                   0                   0                   0                   0

  Columns 31 through 35

                   0                   0                   0                   0                   0

  Columns 36 through 40

                   0                   0                   0                   0                   0

  Columns 41 through 45

                   0                   0                   0                   0                   0

  Columns 46 through 50

                   0                   0                   0                   0                   0

  Columns 51 through 55

                   0                   0                   0                   0                   0

  Columns 56 through 60

                   0                   0                   0                   0                   0

  Column 61

                   0


inner_code_BER =

  Columns 1 through 5

   0.453077185414537   0.450784504721612   0.448323653110363   0.445675208332341   0.442816225411191

  Columns 6 through 10

   0.439719329734277   0.436351504531017   0.432672442603720   0.428632263229845   0.424168281132739

  Columns 11 through 15

   0.419200319116889   0.413623707462851   0.407298460396732   0.400031823567833                   0

  Columns 16 through 20

                   0                   0                   0                   0                   0

  Columns 21 through 25

                   0                   0                   0                   0                   0

  Columns 26 through 30

                   0                   0                   0                   0                   0

  Columns 31 through 35

                   0                   0                   0                   0                   0

  Columns 36 through 40

                   0                   0                   0                   0                   0

  Columns 41 through 45

                   0                   0                   0                   0                   0

  Columns 46 through 50

                   0                   0                   0                   0                   0

  Columns 51 through 55

                   0                   0                   0                   0                   0

  Columns 56 through 60

                   0                   0                   0                   0                   0

  Column 61

                   0


outer_code_BER =

  Columns 1 through 5

   0.453077185414538   0.450784504721612   0.448323653110363   0.445675208332342   0.442816225411191

  Columns 6 through 10

   0.439719329734278   0.436351504531018   0.432672442603720   0.428632263229845   0.424168281132740

  Columns 11 through 15

   0.419200319116889   0.413623707462851   0.407298460396732   0.400031823567833                   0

  Columns 16 through 20

                   0                   0                   0                   0                   0

  Columns 21 through 25

                   0                   0                   0                   0                   0

  Columns 26 through 30

                   0                   0                   0                   0                   0

  Columns 31 through 35

                   0                   0                   0                   0                   0

  Columns 36 through 40

                   0                   0                   0                   0                   0

  Columns 41 through 45

                   0                   0                   0                   0                   0

  Columns 46 through 50

                   0                   0                   0                   0                   0

  Columns 51 through 55

                   0                   0                   0                   0                   0

  Columns 56 through 60

                   0                   0                   0                   0                   0

  Column 61

                   0


inner_code_BER =

  Columns 1 through 5

   0.453077185414537   0.450784504721612   0.448323653110363   0.445675208332341   0.442816225411191

  Columns 6 through 10

   0.439719329734277   0.436351504531017   0.432672442603720   0.428632263229845   0.424168281132739

  Columns 11 through 15

   0.419200319116889   0.413623707462851   0.407298460396732   0.400031823567833   0.391548619654289

  Columns 16 through 20

                   0                   0                   0                   0                   0

  Columns 21 through 25

                   0                   0                   0                   0                   0

  Columns 26 through 30

                   0                   0                   0                   0                   0

  Columns 31 through 35

                   0                   0                   0                   0                   0

  Columns 36 through 40

                   0                   0                   0                   0                   0

  Columns 41 through 45

                   0                   0                   0                   0                   0

  Columns 46 through 50

                   0                   0                   0                   0                   0

  Columns 51 through 55

                   0                   0                   0                   0                   0

  Columns 56 through 60

                   0                   0                   0                   0                   0

  Column 61

                   0


outer_code_BER =

  Columns 1 through 5

   0.453077185414538   0.450784504721612   0.448323653110363   0.445675208332342   0.442816225411191

  Columns 6 through 10

   0.439719329734278   0.436351504531018   0.432672442603720   0.428632263229845   0.424168281132740

  Columns 11 through 15

   0.419200319116889   0.413623707462851   0.407298460396732   0.400031823567833   0.391548619654290

  Columns 16 through 20

                   0                   0                   0                   0                   0

  Columns 21 through 25

                   0                   0                   0                   0                   0

  Columns 26 through 30

                   0                   0                   0                   0                   0

  Columns 31 through 35

                   0                   0                   0                   0                   0

  Columns 36 through 40

                   0                   0                   0                   0                   0

  Columns 41 through 45

                   0                   0                   0                   0                   0

  Columns 46 through 50

                   0                   0                   0                   0                   0

  Columns 51 through 55

                   0                   0                   0                   0                   0

  Columns 56 through 60

                   0                   0                   0                   0                   0

  Column 61

                   0


inner_code_BER =

  Columns 1 through 5

   0.453077185414537   0.450784504721612   0.448323653110363   0.445675208332341   0.442816225411191

  Columns 6 through 10

   0.439719329734277   0.436351504531017   0.432672442603720   0.428632263229845   0.424168281132739

  Columns 11 through 15

   0.419200319116889   0.413623707462851   0.407298460396732   0.400031823567833   0.391548619654289

  Columns 16 through 20

   0.381437352772370                   0                   0                   0                   0

  Columns 21 through 25

                   0                   0                   0                   0                   0

  Columns 26 through 30

                   0                   0                   0                   0                   0

  Columns 31 through 35

                   0                   0                   0                   0                   0

  Columns 36 through 40

                   0                   0                   0                   0                   0

  Columns 41 through 45

                   0                   0                   0                   0                   0

  Columns 46 through 50

                   0                   0                   0                   0                   0

  Columns 51 through 55

                   0                   0                   0                   0                   0

  Columns 56 through 60

                   0                   0                   0                   0                   0

  Column 61

                   0


outer_code_BER =

  Columns 1 through 5

   0.453077185414538   0.450784504721612   0.448323653110363   0.445675208332342   0.442816225411191

  Columns 6 through 10

   0.439719329734278   0.436351504531018   0.432672442603720   0.428632263229845   0.424168281132740

  Columns 11 through 15

   0.419200319116889   0.413623707462851   0.407298460396732   0.400031823567833   0.391548619654290

  Columns 16 through 20

   0.381437352772370                   0                   0                   0                   0

  Columns 21 through 25

                   0                   0                   0                   0                   0

  Columns 26 through 30

                   0                   0                   0                   0                   0

  Columns 31 through 35

                   0                   0                   0                   0                   0

  Columns 36 through 40

                   0                   0                   0                   0                   0

  Columns 41 through 45

                   0                   0                   0                   0                   0

  Columns 46 through 50

                   0                   0                   0                   0                   0

  Columns 51 through 55

                   0                   0                   0                   0                   0

  Columns 56 through 60

                   0                   0                   0                   0                   0

  Column 61

                   0


inner_code_BER =

  Columns 1 through 5

   0.453077185414537   0.450784504721612   0.448323653110363   0.445675208332341   0.442816225411191

  Columns 6 through 10

   0.439719329734277   0.436351504531017   0.432672442603720   0.428632263229845   0.424168281132739

  Columns 11 through 15

   0.419200319116889   0.413623707462851   0.407298460396732   0.400031823567833   0.391548619654289

  Columns 16 through 20

   0.381437352772370   0.369043036459108                   0                   0                   0

  Columns 21 through 25

                   0                   0                   0                   0                   0

  Columns 26 through 30

                   0                   0                   0                   0                   0

  Columns 31 through 35

                   0                   0                   0                   0                   0

  Columns 36 through 40

                   0                   0                   0                   0                   0

  Columns 41 through 45

                   0                   0                   0                   0                   0

  Columns 46 through 50

                   0                   0                   0                   0                   0

  Columns 51 through 55

                   0                   0                   0                   0                   0

  Columns 56 through 60

                   0                   0                   0                   0                   0

  Column 61

                   0


outer_code_BER =

  Columns 1 through 5

   0.453077185414538   0.450784504721612   0.448323653110363   0.445675208332342   0.442816225411191

  Columns 6 through 10

   0.439719329734278   0.436351504531018   0.432672442603720   0.428632263229845   0.424168281132740

  Columns 11 through 15

   0.419200319116889   0.413623707462851   0.407298460396732   0.400031823567833   0.391548619654290

  Columns 16 through 20

   0.381437352772370   0.369043036459109                   0                   0                   0

  Columns 21 through 25

                   0                   0                   0                   0                   0

  Columns 26 through 30

                   0                   0                   0                   0                   0

  Columns 31 through 35

                   0                   0                   0                   0                   0

  Columns 36 through 40

                   0                   0                   0                   0                   0

  Columns 41 through 45

                   0                   0                   0                   0                   0

  Columns 46 through 50

                   0                   0                   0                   0                   0

  Columns 51 through 55

                   0                   0                   0                   0                   0

  Columns 56 through 60

                   0                   0                   0                   0                   0

  Column 61

                   0


inner_code_BER =

  Columns 1 through 5

   0.453077185414537   0.450784504721612   0.448323653110363   0.445675208332341   0.442816225411191

  Columns 6 through 10

   0.439719329734277   0.436351504531017   0.432672442603720   0.428632263229845   0.424168281132739

  Columns 11 through 15

   0.419200319116889   0.413623707462851   0.407298460396732   0.400031823567833   0.391548619654289

  Columns 16 through 20

   0.381437352772370   0.369043036459108   0.353225512835678                   0                   0

  Columns 21 through 25

                   0                   0                   0                   0                   0

  Columns 26 through 30

                   0                   0                   0                   0                   0

  Columns 31 through 35

                   0                   0                   0                   0                   0

  Columns 36 through 40

                   0                   0                   0                   0                   0

  Columns 41 through 45

                   0                   0                   0                   0                   0

  Columns 46 through 50

                   0                   0                   0                   0                   0

  Columns 51 through 55

                   0                   0                   0                   0                   0

  Columns 56 through 60

                   0                   0                   0                   0                   0

  Column 61

                   0


outer_code_BER =

  Columns 1 through 5

   0.453077185414538   0.450784504721612   0.448323653110363   0.445675208332342   0.442816225411191

  Columns 6 through 10

   0.439719329734278   0.436351504531018   0.432672442603720   0.428632263229845   0.424168281132740

  Columns 11 through 15

   0.419200319116889   0.413623707462851   0.407298460396732   0.400031823567833   0.391548619654290

  Columns 16 through 20

   0.381437352772370   0.369043036459109   0.353225512835678                   0                   0

  Columns 21 through 25

                   0                   0                   0                   0                   0

  Columns 26 through 30

                   0                   0                   0                   0                   0

  Columns 31 through 35

                   0                   0                   0                   0                   0

  Columns 36 through 40

                   0                   0                   0                   0                   0

  Columns 41 through 45

                   0                   0                   0                   0                   0

  Columns 46 through 50

                   0                   0                   0                   0                   0

  Columns 51 through 55

                   0                   0                   0                   0                   0

  Columns 56 through 60

                   0                   0                   0                   0                   0

  Column 61

                   0


inner_code_BER =

  Columns 1 through 5

   0.453077185414537   0.450784504721612   0.448323653110363   0.445675208332341   0.442816225411191

  Columns 6 through 10

   0.439719329734277   0.436351504531017   0.432672442603720   0.428632263229845   0.424168281132739

  Columns 11 through 15

   0.419200319116889   0.413623707462851   0.407298460396732   0.400031823567833   0.391548619654289

  Columns 16 through 20

   0.381437352772370   0.369043036459108   0.353225512835678   0.331703980249815                   0

  Columns 21 through 25

                   0                   0                   0                   0                   0

  Columns 26 through 30

                   0                   0                   0                   0                   0

  Columns 31 through 35

                   0                   0                   0                   0                   0

  Columns 36 through 40

                   0                   0                   0                   0                   0

  Columns 41 through 45

                   0                   0                   0                   0                   0

  Columns 46 through 50

                   0                   0                   0                   0                   0

  Columns 51 through 55

                   0                   0                   0                   0                   0

  Columns 56 through 60

                   0                   0                   0                   0                   0

  Column 61

                   0


outer_code_BER =

  Columns 1 through 5

   0.453077185414538   0.450784504721612   0.448323653110363   0.445675208332342   0.442816225411191

  Columns 6 through 10

   0.439719329734278   0.436351504531018   0.432672442603720   0.428632263229845   0.424168281132740

  Columns 11 through 15

   0.419200319116889   0.413623707462851   0.407298460396732   0.400031823567833   0.391548619654290

  Columns 16 through 20

   0.381437352772370   0.369043036459109   0.353225512835678   0.331703980249815                   0

  Columns 21 through 25

                   0                   0                   0                   0                   0

  Columns 26 through 30

                   0                   0                   0                   0                   0

  Columns 31 through 35

                   0                   0                   0                   0                   0

  Columns 36 through 40

                   0                   0                   0                   0                   0

  Columns 41 through 45

                   0                   0                   0                   0                   0

  Columns 46 through 50

                   0                   0                   0                   0                   0

  Columns 51 through 55

                   0                   0                   0                   0                   0

  Columns 56 through 60

                   0                   0                   0                   0                   0

  Column 61

                   0


inner_code_BER =

  Columns 1 through 5

   0.453077185414537   0.450784504721612   0.448323653110363   0.445675208332341   0.442816225411191

  Columns 6 through 10

   0.439719329734277   0.436351504531017   0.432672442603720   0.428632263229845   0.424168281132739

  Columns 11 through 15

   0.419200319116889   0.413623707462851   0.407298460396732   0.400031823567833   0.391548619654289

  Columns 16 through 20

   0.381437352772370   0.369043036459108   0.353225512835678   0.331703980249815   0.298706053320047

  Columns 21 through 25

                   0                   0                   0                   0                   0

  Columns 26 through 30

                   0                   0                   0                   0                   0

  Columns 31 through 35

                   0                   0                   0                   0                   0

  Columns 36 through 40

                   0                   0                   0                   0                   0

  Columns 41 through 45

                   0                   0                   0                   0                   0

  Columns 46 through 50

                   0                   0                   0                   0                   0

  Columns 51 through 55

                   0                   0                   0                   0                   0

  Columns 56 through 60

                   0                   0                   0                   0                   0

  Column 61

                   0


outer_code_BER =

  Columns 1 through 5

   0.453077185414538   0.450784504721612   0.448323653110363   0.445675208332342   0.442816225411191

  Columns 6 through 10

   0.439719329734278   0.436351504531018   0.432672442603720   0.428632263229845   0.424168281132740

  Columns 11 through 15

   0.419200319116889   0.413623707462851   0.407298460396732   0.400031823567833   0.391548619654290

  Columns 16 through 20

   0.381437352772370   0.369043036459109   0.353225512835678   0.331703980249815   0.298706053320046

  Columns 21 through 25

                   0                   0                   0                   0                   0

  Columns 26 through 30

                   0                   0                   0                   0                   0

  Columns 31 through 35

                   0                   0                   0                   0                   0

  Columns 36 through 40

                   0                   0                   0                   0                   0

  Columns 41 through 45

                   0                   0                   0                   0                   0

  Columns 46 through 50

                   0                   0                   0                   0                   0

  Columns 51 through 55

                   0                   0                   0                   0                   0

  Columns 56 through 60

                   0                   0                   0                   0                   0

  Column 61

                   0


inner_code_BER =

  Columns 1 through 5

   0.453077185414537   0.450784504721612   0.448323653110363   0.445675208332341   0.442816225411191

  Columns 6 through 10

   0.439719329734277   0.436351504531017   0.432672442603720   0.428632263229845   0.424168281132739

  Columns 11 through 15

   0.419200319116889   0.413623707462851   0.407298460396732   0.400031823567833   0.391548619654289

  Columns 16 through 20

   0.381437352772370   0.369043036459108   0.353225512835678   0.331703980249815   0.298706053320047

  Columns 21 through 25

   0.233060591019574                   0                   0                   0                   0

  Columns 26 through 30

                   0                   0                   0                   0                   0

  Columns 31 through 35

                   0                   0                   0                   0                   0

  Columns 36 through 40

                   0                   0                   0                   0                   0

  Columns 41 through 45

                   0                   0                   0                   0                   0

  Columns 46 through 50

                   0                   0                   0                   0                   0

  Columns 51 through 55

                   0                   0                   0                   0                   0

  Columns 56 through 60

                   0                   0                   0                   0                   0

  Column 61

                   0


outer_code_BER =

  Columns 1 through 5

   0.453077185414538   0.450784504721612   0.448323653110363   0.445675208332342   0.442816225411191

  Columns 6 through 10

   0.439719329734278   0.436351504531018   0.432672442603720   0.428632263229845   0.424168281132740

  Columns 11 through 15

   0.419200319116889   0.413623707462851   0.407298460396732   0.400031823567833   0.391548619654290

  Columns 16 through 20

   0.381437352772370   0.369043036459109   0.353225512835678   0.331703980249815   0.298706053320046

  Columns 21 through 25

   0.233060591019575                   0                   0                   0                   0

  Columns 26 through 30

                   0                   0                   0                   0                   0

  Columns 31 through 35

                   0                   0                   0                   0                   0

  Columns 36 through 40

                   0                   0                   0                   0                   0

  Columns 41 through 45

                   0                   0                   0                   0                   0

  Columns 46 through 50

                   0                   0                   0                   0                   0

  Columns 51 through 55

                   0                   0                   0                   0                   0

  Columns 56 through 60

                   0                   0                   0                   0                   0

  Column 61

                   0


inner_code_BER =

  Columns 1 through 5

   0.453077185414537   0.450784504721612   0.448323653110363   0.445675208332341   0.442816225411191

  Columns 6 through 10

   0.439719329734277   0.436351504531017   0.432672442603720   0.428632263229845   0.424168281132739

  Columns 11 through 15

   0.419200319116889   0.413623707462851   0.407298460396732   0.400031823567833   0.391548619654289

  Columns 16 through 20

   0.381437352772370   0.369043036459108   0.353225512835678   0.331703980249815   0.298706053320047

  Columns 21 through 25

   0.233060591019574   0.074620824162196                   0                   0                   0

  Columns 26 through 30

                   0                   0                   0                   0                   0

  Columns 31 through 35

                   0                   0                   0                   0                   0

  Columns 36 through 40

                   0                   0                   0                   0                   0

  Columns 41 through 45

                   0                   0                   0                   0                   0

  Columns 46 through 50

                   0                   0                   0                   0                   0

  Columns 51 through 55

                   0                   0                   0                   0                   0

  Columns 56 through 60

                   0                   0                   0                   0                   0

  Column 61

                   0


outer_code_BER =

  Columns 1 through 5

   0.453077185414538   0.450784504721612   0.448323653110363   0.445675208332342   0.442816225411191

  Columns 6 through 10

   0.439719329734278   0.436351504531018   0.432672442603720   0.428632263229845   0.424168281132740

  Columns 11 through 15

   0.419200319116889   0.413623707462851   0.407298460396732   0.400031823567833   0.391548619654290

  Columns 16 through 20

   0.381437352772370   0.369043036459109   0.353225512835678   0.331703980249815   0.298706053320046

  Columns 21 through 25

   0.233060591019575   0.074620824162200                   0                   0                   0

  Columns 26 through 30

                   0                   0                   0                   0                   0

  Columns 31 through 35

                   0                   0                   0                   0                   0

  Columns 36 through 40

                   0                   0                   0                   0                   0

  Columns 41 through 45

                   0                   0                   0                   0                   0

  Columns 46 through 50

                   0                   0                   0                   0                   0

  Columns 51 through 55

                   0                   0                   0                   0                   0

  Columns 56 through 60

                   0                   0                   0                   0                   0

  Column 61

                   0


inner_code_BER =

  Columns 1 through 5

   0.453077185414537   0.450784504721612   0.448323653110363   0.445675208332341   0.442816225411191

  Columns 6 through 10

   0.439719329734277   0.436351504531017   0.432672442603720   0.428632263229845   0.424168281132739

  Columns 11 through 15

   0.419200319116889   0.413623707462851   0.407298460396732   0.400031823567833   0.391548619654289

  Columns 16 through 20

   0.381437352772370   0.369043036459108   0.353225512835678   0.331703980249815   0.298706053320047

  Columns 21 through 25

   0.233060591019574   0.074620824162196   0.002606746380092                   0                   0

  Columns 26 through 30

                   0                   0                   0                   0                   0

  Columns 31 through 35

                   0                   0                   0                   0                   0

  Columns 36 through 40

                   0                   0                   0                   0                   0

  Columns 41 through 45

                   0                   0                   0                   0                   0

  Columns 46 through 50

                   0                   0                   0                   0                   0

  Columns 51 through 55

                   0                   0                   0                   0                   0

  Columns 56 through 60

                   0                   0                   0                   0                   0

  Column 61

                   0


outer_code_BER =

  Columns 1 through 5

   0.453077185414538   0.450784504721612   0.448323653110363   0.445675208332342   0.442816225411191

  Columns 6 through 10

   0.439719329734278   0.436351504531018   0.432672442603720   0.428632263229845   0.424168281132740

  Columns 11 through 15

   0.419200319116889   0.413623707462851   0.407298460396732   0.400031823567833   0.391548619654290

  Columns 16 through 20

   0.381437352772370   0.369043036459109   0.353225512835678   0.331703980249815   0.298706053320046

  Columns 21 through 25

   0.233060591019575   0.074620824162200   0.000000000612084                   0                   0

  Columns 26 through 30

                   0                   0                   0                   0                   0

  Columns 31 through 35

                   0                   0                   0                   0                   0

  Columns 36 through 40

                   0                   0                   0                   0                   0

  Columns 41 through 45

                   0                   0                   0                   0                   0

  Columns 46 through 50

                   0                   0                   0                   0                   0

  Columns 51 through 55

                   0                   0                   0                   0                   0

  Columns 56 through 60

                   0                   0                   0                   0                   0

  Column 61

                   0

µ±Ç°ÍâÂëÎóÂëÂÊÒÑµÍÓÚÄ¿±êÎóÂëÂÊ£¬ÐÅÔë±ÈÎª2.20 dB

inner_code_BER =

  Columns 1 through 5

   0.453077185414537   0.450784504721612   0.448323653110363   0.445675208332341   0.442816225411191

  Columns 6 through 10

   0.439719329734277   0.436351504531017   0.432672442603720   0.428632263229845   0.424168281132739

  Columns 11 through 15

   0.419200319116889   0.413623707462851   0.407298460396732   0.400031823567833   0.391548619654289

  Columns 16 through 20

   0.381437352772370   0.369043036459108   0.353225512835678   0.331703980249815   0.298706053320047

  Columns 21 through 25

   0.233060591019574   0.074620824162196   0.002606746380092   0.002288418577615                   0

  Columns 26 through 30

                   0                   0                   0                   0                   0

  Columns 31 through 35

                   0                   0                   0                   0                   0

  Columns 36 through 40

                   0                   0                   0                   0                   0

  Columns 41 through 45

                   0                   0                   0                   0                   0

  Columns 46 through 50

                   0                   0                   0                   0                   0

  Columns 51 through 55

                   0                   0                   0                   0                   0

  Columns 56 through 60

                   0                   0                   0                   0                   0

  Column 61

                   0


inner_code_BER =

  Columns 1 through 5

   0.453077185414537   0.450784504721612   0.448323653110363   0.445675208332341   0.442816225411191

  Columns 6 through 10

   0.439719329734277   0.436351504531017   0.432672442603720   0.428632263229845   0.424168281132739

  Columns 11 through 15

   0.419200319116889   0.413623707462851   0.407298460396732   0.400031823567833   0.391548619654289

  Columns 16 through 20

   0.381437352772370   0.369043036459108   0.353225512835678   0.331703980249815   0.298706053320047

  Columns 21 through 25

   0.233060591019574   0.074620824162196   0.002606746380092   0.002288418577615   0.002030214221346

  Columns 26 through 30

                   0                   0                   0                   0                   0

  Columns 31 through 35

                   0                   0                   0                   0                   0

  Columns 36 through 40

                   0                   0                   0                   0                   0

  Columns 41 through 45

                   0                   0                   0                   0                   0

  Columns 46 through 50

                   0                   0                   0                   0                   0

  Columns 51 through 55

                   0                   0                   0                   0                   0

  Columns 56 through 60

                   0                   0                   0                   0                   0

  Column 61

                   0


inner_code_BER =

  Columns 1 through 5

   0.453077185414537   0.450784504721612   0.448323653110363   0.445675208332341   0.442816225411191

  Columns 6 through 10

   0.439719329734277   0.436351504531017   0.432672442603720   0.428632263229845   0.424168281132739

  Columns 11 through 15

   0.419200319116889   0.413623707462851   0.407298460396732   0.400031823567833   0.391548619654289

  Columns 16 through 20

   0.381437352772370   0.369043036459108   0.353225512835678   0.331703980249815   0.298706053320047

  Columns 21 through 25

   0.233060591019574   0.074620824162196   0.002606746380092   0.002288418577615   0.002030214221346

  Columns 26 through 30

   0.001815444794717                   0                   0                   0                   0

  Columns 31 through 35

                   0                   0                   0                   0                   0

  Columns 36 through 40

                   0                   0                   0                   0                   0

  Columns 41 through 45

                   0                   0                   0                   0                   0

  Columns 46 through 50

                   0                   0                   0                   0                   0

  Columns 51 through 55

                   0                   0                   0                   0                   0

  Columns 56 through 60

                   0                   0                   0                   0                   0

  Column 61

                   0


inner_code_BER =

  Columns 1 through 5

   0.453077185414537   0.450784504721612   0.448323653110363   0.445675208332341   0.442816225411191

  Columns 6 through 10

   0.439719329734277   0.436351504531017   0.432672442603720   0.428632263229845   0.424168281132739

  Columns 11 through 15

   0.419200319116889   0.413623707462851   0.407298460396732   0.400031823567833   0.391548619654289

  Columns 16 through 20

   0.381437352772370   0.369043036459108   0.353225512835678   0.331703980249815   0.298706053320047

  Columns 21 through 25

   0.233060591019574   0.074620824162196   0.002606746380092   0.002288418577615   0.002030214221346

  Columns 26 through 30

   0.001815444794717   0.001633503124381                   0                   0                   0

  Columns 31 through 35

                   0                   0                   0                   0                   0

  Columns 36 through 40

                   0                   0                   0                   0                   0

  Columns 41 through 45

                   0                   0                   0                   0                   0

  Columns 46 through 50

                   0                   0                   0                   0                   0

  Columns 51 through 55

                   0                   0                   0                   0                   0

  Columns 56 through 60

                   0                   0                   0                   0                   0

  Column 61

                   0


inner_code_BER =

  Columns 1 through 5

   0.453077185414537   0.450784504721612   0.448323653110363   0.445675208332341   0.442816225411191

  Columns 6 through 10

   0.439719329734277   0.436351504531017   0.432672442603720   0.428632263229845   0.424168281132739

  Columns 11 through 15

   0.419200319116889   0.413623707462851   0.407298460396732   0.400031823567833   0.391548619654289

  Columns 16 through 20

   0.381437352772370   0.369043036459108   0.353225512835678   0.331703980249815   0.298706053320047

  Columns 21 through 25

   0.233060591019574   0.074620824162196   0.002606746380092   0.002288418577615   0.002030214221346

  Columns 26 through 30

   0.001815444794717   0.001633503124381   0.001477207010347                   0                   0

  Columns 31 through 35

                   0                   0                   0                   0                   0

  Columns 36 through 40

                   0                   0                   0                   0                   0

  Columns 41 through 45

                   0                   0                   0                   0                   0

  Columns 46 through 50

                   0                   0                   0                   0                   0

  Columns 51 through 55

                   0                   0                   0                   0                   0

  Columns 56 through 60

                   0                   0                   0                   0                   0

  Column 61

                   0


inner_code_BER =

  Columns 1 through 5

   0.453077185414537   0.450784504721612   0.448323653110363   0.445675208332341   0.442816225411191

  Columns 6 through 10

   0.439719329734277   0.436351504531017   0.432672442603720   0.428632263229845   0.424168281132739

  Columns 11 through 15

   0.419200319116889   0.413623707462851   0.407298460396732   0.400031823567833   0.391548619654289

  Columns 16 through 20

   0.381437352772370   0.369043036459108   0.353225512835678   0.331703980249815   0.298706053320047

  Columns 21 through 25

   0.233060591019574   0.074620824162196   0.002606746380092   0.002288418577615   0.002030214221346

  Columns 26 through 30

   0.001815444794717   0.001633503124381   0.001477207010347   0.001341458693781                   0

  Columns 31 through 35

                   0                   0                   0                   0                   0

  Columns 36 through 40

                   0                   0                   0                   0                   0

  Columns 41 through 45

                   0                   0                   0                   0                   0

  Columns 46 through 50

                   0                   0                   0                   0                   0

  Columns 51 through 55

                   0                   0                   0                   0                   0

  Columns 56 through 60

                   0                   0                   0                   0                   0

  Column 61

                   0


inner_code_BER =

  Columns 1 through 5

   0.453077185414537   0.450784504721612   0.448323653110363   0.445675208332341   0.442816225411191

  Columns 6 through 10

   0.439719329734277   0.436351504531017   0.432672442603720   0.428632263229845   0.424168281132739

  Columns 11 through 15

   0.419200319116889   0.413623707462851   0.407298460396732   0.400031823567833   0.391548619654289

  Columns 16 through 20

   0.381437352772370   0.369043036459108   0.353225512835678   0.331703980249815   0.298706053320047

  Columns 21 through 25

   0.233060591019574   0.074620824162196   0.002606746380092   0.002288418577615   0.002030214221346

  Columns 26 through 30

   0.001815444794717   0.001633503124381   0.001477207010347   0.001341458693781   0.001222505348907

  Columns 31 through 35

                   0                   0                   0                   0                   0

  Columns 36 through 40

                   0                   0                   0                   0                   0

  Columns 41 through 45

                   0                   0                   0                   0                   0

  Columns 46 through 50

                   0                   0                   0                   0                   0

  Columns 51 through 55

                   0                   0                   0                   0                   0

  Columns 56 through 60

                   0                   0                   0                   0                   0

  Column 61

                   0


inner_code_BER =

  Columns 1 through 5

   0.453077185414537   0.450784504721612   0.448323653110363   0.445675208332341   0.442816225411191

  Columns 6 through 10

   0.439719329734277   0.436351504531017   0.432672442603720   0.428632263229845   0.424168281132739

  Columns 11 through 15

   0.419200319116889   0.413623707462851   0.407298460396732   0.400031823567833   0.391548619654289

  Columns 16 through 20

   0.381437352772370   0.369043036459108   0.353225512835678   0.331703980249815   0.298706053320047

  Columns 21 through 25

   0.233060591019574   0.074620824162196   0.002606746380092   0.002288418577615   0.002030214221346

  Columns 26 through 30

   0.001815444794717   0.001633503124381   0.001477207010347   0.001341458693781   0.001222505348907

  Columns 31 through 35

   0.001117502552491                   0                   0                   0                   0

  Columns 36 through 40

                   0                   0                   0                   0                   0

  Columns 41 through 45

                   0                   0                   0                   0                   0

  Columns 46 through 50

                   0                   0                   0                   0                   0

  Columns 51 through 55

                   0                   0                   0                   0                   0

  Columns 56 through 60

                   0                   0                   0                   0                   0

  Column 61

                   0


inner_code_BER =

  Columns 1 through 5

   0.453077185414537   0.450784504721612   0.448323653110363   0.445675208332341   0.442816225411191

  Columns 6 through 10

   0.439719329734277   0.436351504531017   0.432672442603720   0.428632263229845   0.424168281132739

  Columns 11 through 15

   0.419200319116889   0.413623707462851   0.407298460396732   0.400031823567833   0.391548619654289

  Columns 16 through 20

   0.381437352772370   0.369043036459108   0.353225512835678   0.331703980249815   0.298706053320047

  Columns 21 through 25

   0.233060591019574   0.074620824162196   0.002606746380092   0.002288418577615   0.002030214221346

  Columns 26 through 30

   0.001815444794717   0.001633503124381   0.001477207010347   0.001341458693781   0.001222505348907

  Columns 31 through 35

   0.001117502552491   0.001024242468384                   0                   0                   0

  Columns 36 through 40

                   0                   0                   0                   0                   0

  Columns 41 through 45

                   0                   0                   0                   0                   0

  Columns 46 through 50

                   0                   0                   0                   0                   0

  Columns 51 through 55

                   0                   0                   0                   0                   0

  Columns 56 through 60

                   0                   0                   0                   0                   0

  Column 61

                   0


inner_code_BER =

  Columns 1 through 5

   0.453077185414537   0.450784504721612   0.448323653110363   0.445675208332341   0.442816225411191

  Columns 6 through 10

   0.439719329734277   0.436351504531017   0.432672442603720   0.428632263229845   0.424168281132739

  Columns 11 through 15

   0.419200319116889   0.413623707462851   0.407298460396732   0.400031823567833   0.391548619654289

  Columns 16 through 20

   0.381437352772370   0.369043036459108   0.353225512835678   0.331703980249815   0.298706053320047

  Columns 21 through 25

   0.233060591019574   0.074620824162196   0.002606746380092   0.002288418577615   0.002030214221346

  Columns 26 through 30

   0.001815444794717   0.001633503124381   0.001477207010347   0.001341458693781   0.001222505348907

  Columns 31 through 35

   0.001117502552491   0.001024242468384   0.000940977110750                   0                   0

  Columns 36 through 40

                   0                   0                   0                   0                   0

  Columns 41 through 45

                   0                   0                   0                   0                   0

  Columns 46 through 50

                   0                   0                   0                   0                   0

  Columns 51 through 55

                   0                   0                   0                   0                   0

  Columns 56 through 60

                   0                   0                   0                   0                   0

  Column 61

                   0


inner_code_BER =

  Columns 1 through 5

   0.453077185414537   0.450784504721612   0.448323653110363   0.445675208332341   0.442816225411191

  Columns 6 through 10

   0.439719329734277   0.436351504531017   0.432672442603720   0.428632263229845   0.424168281132739

  Columns 11 through 15

   0.419200319116889   0.413623707462851   0.407298460396732   0.400031823567833   0.391548619654289

  Columns 16 through 20

   0.381437352772370   0.369043036459108   0.353225512835678   0.331703980249815   0.298706053320047

  Columns 21 through 25

   0.233060591019574   0.074620824162196   0.002606746380092   0.002288418577615   0.002030214221346

  Columns 26 through 30

   0.001815444794717   0.001633503124381   0.001477207010347   0.001341458693781   0.001222505348907

  Columns 31 through 35

   0.001117502552491   0.001024242468384   0.000940977110750   0.000866299235902                   0

  Columns 36 through 40

                   0                   0                   0                   0                   0

  Columns 41 through 45

                   0                   0                   0                   0                   0

  Columns 46 through 50

                   0                   0                   0                   0                   0

  Columns 51 through 55

                   0                   0                   0                   0                   0

  Columns 56 through 60

                   0                   0                   0                   0                   0

  Column 61

                   0


inner_code_BER =

  Columns 1 through 5

   0.453077185414537   0.450784504721612   0.448323653110363   0.445675208332341   0.442816225411191

  Columns 6 through 10

   0.439719329734277   0.436351504531017   0.432672442603720   0.428632263229845   0.424168281132739

  Columns 11 through 15

   0.419200319116889   0.413623707462851   0.407298460396732   0.400031823567833   0.391548619654289

  Columns 16 through 20

   0.381437352772370   0.369043036459108   0.353225512835678   0.331703980249815   0.298706053320047

  Columns 21 through 25

   0.233060591019574   0.074620824162196   0.002606746380092   0.002288418577615   0.002030214221346

  Columns 26 through 30

   0.001815444794717   0.001633503124381   0.001477207010347   0.001341458693781   0.001222505348907

  Columns 31 through 35

   0.001117502552491   0.001024242468384   0.000940977110750   0.000866299235902   0.000799059611389

  Columns 36 through 40

                   0                   0                   0                   0                   0

  Columns 41 through 45

                   0                   0                   0                   0                   0

  Columns 46 through 50

                   0                   0                   0                   0                   0

  Columns 51 through 55

                   0                   0                   0                   0                   0

  Columns 56 through 60

                   0                   0                   0                   0                   0

  Column 61

                   0


inner_code_BER =

  Columns 1 through 5

   0.453077185414537   0.450784504721612   0.448323653110363   0.445675208332341   0.442816225411191

  Columns 6 through 10

   0.439719329734277   0.436351504531017   0.432672442603720   0.428632263229845   0.424168281132739

  Columns 11 through 15

   0.419200319116889   0.413623707462851   0.407298460396732   0.400031823567833   0.391548619654289

  Columns 16 through 20

   0.381437352772370   0.369043036459108   0.353225512835678   0.331703980249815   0.298706053320047

  Columns 21 through 25

   0.233060591019574   0.074620824162196   0.002606746380092   0.002288418577615   0.002030214221346

  Columns 26 through 30

   0.001815444794717   0.001633503124381   0.001477207010347   0.001341458693781   0.001222505348907

  Columns 31 through 35

   0.001117502552491   0.001024242468384   0.000940977110750   0.000866299235902   0.000799059611389

  Columns 36 through 40

   0.000738308050135                   0                   0                   0                   0

  Columns 41 through 45

                   0                   0                   0                   0                   0

  Columns 46 through 50

                   0                   0                   0                   0                   0

  Columns 51 through 55

                   0                   0                   0                   0                   0

  Columns 56 through 60

                   0                   0                   0                   0                   0

  Column 61

                   0


inner_code_BER =

  Columns 1 through 5

   0.453077185414537   0.450784504721612   0.448323653110363   0.445675208332341   0.442816225411191

  Columns 6 through 10

   0.439719329734277   0.436351504531017   0.432672442603720   0.428632263229845   0.424168281132739

  Columns 11 through 15

   0.419200319116889   0.413623707462851   0.407298460396732   0.400031823567833   0.391548619654289

  Columns 16 through 20

   0.381437352772370   0.369043036459108   0.353225512835678   0.331703980249815   0.298706053320047

  Columns 21 through 25

   0.233060591019574   0.074620824162196   0.002606746380092   0.002288418577615   0.002030214221346

  Columns 26 through 30

   0.001815444794717   0.001633503124381   0.001477207010347   0.001341458693781   0.001222505348907

  Columns 31 through 35

   0.001117502552491   0.001024242468384   0.000940977110750   0.000866299235902   0.000799059611389

  Columns 36 through 40

   0.000738308050135   0.000683250434291                   0                   0                   0

  Columns 41 through 45

                   0                   0                   0                   0                   0

  Columns 46 through 50

                   0                   0                   0                   0                   0

  Columns 51 through 55

                   0                   0                   0                   0                   0

  Columns 56 through 60

                   0                   0                   0                   0                   0

  Column 61

                   0


inner_code_BER =

  Columns 1 through 5

   0.453077185414537   0.450784504721612   0.448323653110363   0.445675208332341   0.442816225411191

  Columns 6 through 10

   0.439719329734277   0.436351504531017   0.432672442603720   0.428632263229845   0.424168281132739

  Columns 11 through 15

   0.419200319116889   0.413623707462851   0.407298460396732   0.400031823567833   0.391548619654289

  Columns 16 through 20

   0.381437352772370   0.369043036459108   0.353225512835678   0.331703980249815   0.298706053320047

  Columns 21 through 25

   0.233060591019574   0.074620824162196   0.002606746380092   0.002288418577615   0.002030214221346

  Columns 26 through 30

   0.001815444794717   0.001633503124381   0.001477207010347   0.001341458693781   0.001222505348907

  Columns 31 through 35

   0.001117502552491   0.001024242468384   0.000940977110750   0.000866299235902   0.000799059611389

  Columns 36 through 40

   0.000738308050135   0.000683250434291   0.000633216775797                   0                   0

  Columns 41 through 45

                   0                   0                   0                   0                   0

  Columns 46 through 50

                   0                   0                   0                   0                   0

  Columns 51 through 55

                   0                   0                   0                   0                   0

  Columns 56 through 60

                   0                   0                   0                   0                   0

  Column 61

                   0


inner_code_BER =

  Columns 1 through 5

   0.453077185414537   0.450784504721612   0.448323653110363   0.445675208332341   0.442816225411191

  Columns 6 through 10

   0.439719329734277   0.436351504531017   0.432672442603720   0.428632263229845   0.424168281132739

  Columns 11 through 15

   0.419200319116889   0.413623707462851   0.407298460396732   0.400031823567833   0.391548619654289

  Columns 16 through 20

   0.381437352772370   0.369043036459108   0.353225512835678   0.331703980249815   0.298706053320047

  Columns 21 through 25

   0.233060591019574   0.074620824162196   0.002606746380092   0.002288418577615   0.002030214221346

  Columns 26 through 30

   0.001815444794717   0.001633503124381   0.001477207010347   0.001341458693781   0.001222505348907

  Columns 31 through 35

   0.001117502552491   0.001024242468384   0.000940977110750   0.000866299235902   0.000799059611389

  Columns 36 through 40

   0.000738308050135   0.000683250434291   0.000633216775797   0.000587637067434                   0

  Columns 41 through 45

                   0                   0                   0                   0                   0

  Columns 46 through 50

                   0                   0                   0                   0                   0

  Columns 51 through 55

                   0                   0                   0                   0                   0

  Columns 56 through 60

                   0                   0                   0                   0                   0

  Column 61

                   0


inner_code_BER =

  Columns 1 through 5

   0.453077185414537   0.450784504721612   0.448323653110363   0.445675208332341   0.442816225411191

  Columns 6 through 10

   0.439719329734277   0.436351504531017   0.432672442603720   0.428632263229845   0.424168281132739

  Columns 11 through 15

   0.419200319116889   0.413623707462851   0.407298460396732   0.400031823567833   0.391548619654289

  Columns 16 through 20

   0.381437352772370   0.369043036459108   0.353225512835678   0.331703980249815   0.298706053320047

  Columns 21 through 25

   0.233060591019574   0.074620824162196   0.002606746380092   0.002288418577615   0.002030214221346

  Columns 26 through 30

   0.001815444794717   0.001633503124381   0.001477207010347   0.001341458693781   0.001222505348907

  Columns 31 through 35

   0.001117502552491   0.001024242468384   0.000940977110750   0.000866299235902   0.000799059611389

  Columns 36 through 40

   0.000738308050135   0.000683250434291   0.000633216775797   0.000587637067434   0.000546022742851

  Columns 41 through 45

                   0                   0                   0                   0                   0

  Columns 46 through 50

                   0                   0                   0                   0                   0

  Columns 51 through 55

                   0                   0                   0                   0                   0

  Columns 56 through 60

                   0                   0                   0                   0                   0

  Column 61

                   0


inner_code_BER =

  Columns 1 through 5

   0.453077185414537   0.450784504721612   0.448323653110363   0.445675208332341   0.442816225411191

  Columns 6 through 10

   0.439719329734277   0.436351504531017   0.432672442603720   0.428632263229845   0.424168281132739

  Columns 11 through 15

   0.419200319116889   0.413623707462851   0.407298460396732   0.400031823567833   0.391548619654289

  Columns 16 through 20

   0.381437352772370   0.369043036459108   0.353225512835678   0.331703980249815   0.298706053320047

  Columns 21 through 25

   0.233060591019574   0.074620824162196   0.002606746380092   0.002288418577615   0.002030214221346

  Columns 26 through 30

   0.001815444794717   0.001633503124381   0.001477207010347   0.001341458693781   0.001222505348907

  Columns 31 through 35

   0.001117502552491   0.001024242468384   0.000940977110750   0.000866299235902   0.000799059611389

  Columns 36 through 40

   0.000738308050135   0.000683250434291   0.000633216775797   0.000587637067434   0.000546022742851

  Columns 41 through 45

   0.000507952246770                   0                   0                   0                   0

  Columns 46 through 50

                   0                   0                   0                   0                   0

  Columns 51 through 55

                   0                   0                   0                   0                   0

  Columns 56 through 60

                   0                   0                   0                   0                   0

  Column 61

                   0


inner_code_BER =

  Columns 1 through 5

   0.453077185414537   0.450784504721612   0.448323653110363   0.445675208332341   0.442816225411191

  Columns 6 through 10

   0.439719329734277   0.436351504531017   0.432672442603720   0.428632263229845   0.424168281132739

  Columns 11 through 15

   0.419200319116889   0.413623707462851   0.407298460396732   0.400031823567833   0.391548619654289

  Columns 16 through 20

   0.381437352772370   0.369043036459108   0.353225512835678   0.331703980249815   0.298706053320047

  Columns 21 through 25

   0.233060591019574   0.074620824162196   0.002606746380092   0.002288418577615   0.002030214221346

  Columns 26 through 30

   0.001815444794717   0.001633503124381   0.001477207010347   0.001341458693781   0.001222505348907

  Columns 31 through 35

   0.001117502552491   0.001024242468384   0.000940977110750   0.000866299235902   0.000799059611389

  Columns 36 through 40

   0.000738308050135   0.000683250434291   0.000633216775797   0.000587637067434   0.000546022742851

  Columns 41 through 45

   0.000507952246770   0.000473059664976                   0                   0                   0

  Columns 46 through 50

                   0                   0                   0                   0                   0

  Columns 51 through 55

                   0                   0                   0                   0                   0

  Columns 56 through 60

                   0                   0                   0                   0                   0

  Column 61

                   0


inner_code_BER =

  Columns 1 through 5

   0.453077185414537   0.450784504721612   0.448323653110363   0.445675208332341   0.442816225411191

  Columns 6 through 10

   0.439719329734277   0.436351504531017   0.432672442603720   0.428632263229845   0.424168281132739

  Columns 11 through 15

   0.419200319116889   0.413623707462851   0.407298460396732   0.400031823567833   0.391548619654289

  Columns 16 through 20

   0.381437352772370   0.369043036459108   0.353225512835678   0.331703980249815   0.298706053320047

  Columns 21 through 25

   0.233060591019574   0.074620824162196   0.002606746380092   0.002288418577615   0.002030214221346

  Columns 26 through 30

   0.001815444794717   0.001633503124381   0.001477207010347   0.001341458693781   0.001222505348907

  Columns 31 through 35

   0.001117502552491   0.001024242468384   0.000940977110750   0.000866299235902   0.000799059611389

  Columns 36 through 40

   0.000738308050135   0.000683250434291   0.000633216775797   0.000587637067434   0.000546022742851

  Columns 41 through 45

   0.000507952246770   0.000473059664976   0.000441025664899                   0                   0

  Columns 46 through 50

                   0                   0                   0                   0                   0

  Columns 51 through 55

                   0                   0                   0                   0                   0

  Columns 56 through 60

                   0                   0                   0                   0                   0

  Column 61

                   0


inner_code_BER =

  Columns 1 through 5

   0.453077185414537   0.450784504721612   0.448323653110363   0.445675208332341   0.442816225411191

  Columns 6 through 10

   0.439719329734277   0.436351504531017   0.432672442603720   0.428632263229845   0.424168281132739

  Columns 11 through 15

   0.419200319116889   0.413623707462851   0.407298460396732   0.400031823567833   0.391548619654289

  Columns 16 through 20

   0.381437352772370   0.369043036459108   0.353225512835678   0.331703980249815   0.298706053320047

  Columns 21 through 25

   0.233060591019574   0.074620824162196   0.002606746380092   0.002288418577615   0.002030214221346

  Columns 26 through 30

   0.001815444794717   0.001633503124381   0.001477207010347   0.001341458693781   0.001222505348907

  Columns 31 through 35

   0.001117502552491   0.001024242468384   0.000940977110750   0.000866299235902   0.000799059611389

  Columns 36 through 40

   0.000738308050135   0.000683250434291   0.000633216775797   0.000587637067434   0.000546022742851

  Columns 41 through 45

   0.000507952246770   0.000473059664976   0.000441025664899   0.000411570203652                   0

  Columns 46 through 50

                   0                   0                   0                   0                   0

  Columns 51 through 55

                   0                   0                   0                   0                   0

  Columns 56 through 60

                   0                   0                   0                   0                   0

  Column 61

                   0


inner_code_BER =

  Columns 1 through 5

   0.453077185414537   0.450784504721612   0.448323653110363   0.445675208332341   0.442816225411191

  Columns 6 through 10

   0.439719329734277   0.436351504531017   0.432672442603720   0.428632263229845   0.424168281132739

  Columns 11 through 15

   0.419200319116889   0.413623707462851   0.407298460396732   0.400031823567833   0.391548619654289

  Columns 16 through 20

   0.381437352772370   0.369043036459108   0.353225512835678   0.331703980249815   0.298706053320047

  Columns 21 through 25

   0.233060591019574   0.074620824162196   0.002606746380092   0.002288418577615   0.002030214221346

  Columns 26 through 30

   0.001815444794717   0.001633503124381   0.001477207010347   0.001341458693781   0.001222505348907

  Columns 31 through 35

   0.001117502552491   0.001024242468384   0.000940977110750   0.000866299235902   0.000799059611389

  Columns 36 through 40

   0.000738308050135   0.000683250434291   0.000633216775797   0.000587637067434   0.000546022742851

  Columns 41 through 45

   0.000507952246770   0.000473059664976   0.000441025664899   0.000411570203652   0.000384446604129

  Columns 46 through 50

                   0                   0                   0                   0                   0

  Columns 51 through 55

                   0                   0                   0                   0                   0

  Columns 56 through 60

                   0                   0                   0                   0                   0

  Column 61

                   0


inner_code_BER =

  Columns 1 through 5

   0.453077185414537   0.450784504721612   0.448323653110363   0.445675208332341   0.442816225411191

  Columns 6 through 10

   0.439719329734277   0.436351504531017   0.432672442603720   0.428632263229845   0.424168281132739

  Columns 11 through 15

   0.419200319116889   0.413623707462851   0.407298460396732   0.400031823567833   0.391548619654289

  Columns 16 through 20

   0.381437352772370   0.369043036459108   0.353225512835678   0.331703980249815   0.298706053320047

  Columns 21 through 25

   0.233060591019574   0.074620824162196   0.002606746380092   0.002288418577615   0.002030214221346

  Columns 26 through 30

   0.001815444794717   0.001633503124381   0.001477207010347   0.001341458693781   0.001222505348907

  Columns 31 through 35

   0.001117502552491   0.001024242468384   0.000940977110750   0.000866299235902   0.000799059611389

  Columns 36 through 40

   0.000738308050135   0.000683250434291   0.000633216775797   0.000587637067434   0.000546022742851

  Columns 41 through 45

   0.000507952246770   0.000473059664976   0.000441025664899   0.000411570203652   0.000384446604129

  Columns 46 through 50

   0.000359436701448                   0                   0                   0                   0

  Columns 51 through 55

                   0                   0                   0                   0                   0

  Columns 56 through 60

                   0                   0                   0                   0                   0

  Column 61

                   0


inner_code_BER =

  Columns 1 through 5

   0.453077185414537   0.450784504721612   0.448323653110363   0.445675208332341   0.442816225411191

  Columns 6 through 10

   0.439719329734277   0.436351504531017   0.432672442603720   0.428632263229845   0.424168281132739

  Columns 11 through 15

   0.419200319116889   0.413623707462851   0.407298460396732   0.400031823567833   0.391548619654289

  Columns 16 through 20

   0.381437352772370   0.369043036459108   0.353225512835678   0.331703980249815   0.298706053320047

  Columns 21 through 25

   0.233060591019574   0.074620824162196   0.002606746380092   0.002288418577615   0.002030214221346

  Columns 26 through 30

   0.001815444794717   0.001633503124381   0.001477207010347   0.001341458693781   0.001222505348907

  Columns 31 through 35

   0.001117502552491   0.001024242468384   0.000940977110750   0.000866299235902   0.000799059611389

  Columns 36 through 40

   0.000738308050135   0.000683250434291   0.000633216775797   0.000587637067434   0.000546022742851

  Columns 41 through 45

   0.000507952246770   0.000473059664976   0.000441025664899   0.000411570203652   0.000384446604129

  Columns 46 through 50

   0.000359436701448   0.000336346835144                   0                   0                   0

  Columns 51 through 55

                   0                   0                   0                   0                   0

  Columns 56 through 60

                   0                   0                   0                   0                   0

  Column 61

                   0


inner_code_BER =

  Columns 1 through 5

   0.453077185414537   0.450784504721612   0.448323653110363   0.445675208332341   0.442816225411191

  Columns 6 through 10

   0.439719329734277   0.436351504531017   0.432672442603720   0.428632263229845   0.424168281132739

  Columns 11 through 15

   0.419200319116889   0.413623707462851   0.407298460396732   0.400031823567833   0.391548619654289

  Columns 16 through 20

   0.381437352772370   0.369043036459108   0.353225512835678   0.331703980249815   0.298706053320047

  Columns 21 through 25

   0.233060591019574   0.074620824162196   0.002606746380092   0.002288418577615   0.002030214221346

  Columns 26 through 30

   0.001815444794717   0.001633503124381   0.001477207010347   0.001341458693781   0.001222505348907

  Columns 31 through 35

   0.001117502552491   0.001024242468384   0.000940977110750   0.000866299235902   0.000799059611389

  Columns 36 through 40

   0.000738308050135   0.000683250434291   0.000633216775797   0.000587637067434   0.000546022742851

  Columns 41 through 45

   0.000507952246770   0.000473059664976   0.000441025664899   0.000411570203652   0.000384446604129

  Columns 46 through 50

   0.000359436701448   0.000336346835144   0.000315004515795                   0                   0

  Columns 51 through 55

                   0                   0                   0                   0                   0

  Columns 56 through 60

                   0                   0                   0                   0                   0

  Column 61

                   0


inner_code_BER =

  Columns 1 through 5

   0.453077185414537   0.450784504721612   0.448323653110363   0.445675208332341   0.442816225411191

  Columns 6 through 10

   0.439719329734277   0.436351504531017   0.432672442603720   0.428632263229845   0.424168281132739

  Columns 11 through 15

   0.419200319116889   0.413623707462851   0.407298460396732   0.400031823567833   0.391548619654289

  Columns 16 through 20

   0.381437352772370   0.369043036459108   0.353225512835678   0.331703980249815   0.298706053320047

  Columns 21 through 25

   0.233060591019574   0.074620824162196   0.002606746380092   0.002288418577615   0.002030214221346

  Columns 26 through 30

   0.001815444794717   0.001633503124381   0.001477207010347   0.001341458693781   0.001222505348907

  Columns 31 through 35

   0.001117502552491   0.001024242468384   0.000940977110750   0.000866299235902   0.000799059611389

  Columns 36 through 40

   0.000738308050135   0.000683250434291   0.000633216775797   0.000587637067434   0.000546022742851

  Columns 41 through 45

   0.000507952246770   0.000473059664976   0.000441025664899   0.000411570203652   0.000384446604129

  Columns 46 through 50

   0.000359436701448   0.000336346835144   0.000315004515795   0.000295255633991                   0

  Columns 51 through 55

                   0                   0                   0                   0                   0

  Columns 56 through 60

                   0                   0                   0                   0                   0

  Column 61

                   0


inner_code_BER =

  Columns 1 through 5

   0.453077185414537   0.450784504721612   0.448323653110363   0.445675208332341   0.442816225411191

  Columns 6 through 10

   0.439719329734277   0.436351504531017   0.432672442603720   0.428632263229845   0.424168281132739

  Columns 11 through 15

   0.419200319116889   0.413623707462851   0.407298460396732   0.400031823567833   0.391548619654289

  Columns 16 through 20

   0.381437352772370   0.369043036459108   0.353225512835678   0.331703980249815   0.298706053320047

  Columns 21 through 25

   0.233060591019574   0.074620824162196   0.002606746380092   0.002288418577615   0.002030214221346

  Columns 26 through 30

   0.001815444794717   0.001633503124381   0.001477207010347   0.001341458693781   0.001222505348907

  Columns 31 through 35

   0.001117502552491   0.001024242468384   0.000940977110750   0.000866299235902   0.000799059611389

  Columns 36 through 40

   0.000738308050135   0.000683250434291   0.000633216775797   0.000587637067434   0.000546022742851

  Columns 41 through 45

   0.000507952246770   0.000473059664976   0.000441025664899   0.000411570203652   0.000384446604129

  Columns 46 through 50

   0.000359436701448   0.000336346835144   0.000315004515795   0.000295255633991   0.000276962108882

  Columns 51 through 55

                   0                   0                   0                   0                   0

  Columns 56 through 60

                   0                   0                   0                   0                   0

  Column 61

                   0


inner_code_BER =

  Columns 1 through 5

   0.453077185414537   0.450784504721612   0.448323653110363   0.445675208332341   0.442816225411191

  Columns 6 through 10

   0.439719329734277   0.436351504531017   0.432672442603720   0.428632263229845   0.424168281132739

  Columns 11 through 15

   0.419200319116889   0.413623707462851   0.407298460396732   0.400031823567833   0.391548619654289

  Columns 16 through 20

   0.381437352772370   0.369043036459108   0.353225512835678   0.331703980249815   0.298706053320047

  Columns 21 through 25

   0.233060591019574   0.074620824162196   0.002606746380092   0.002288418577615   0.002030214221346

  Columns 26 through 30

   0.001815444794717   0.001633503124381   0.001477207010347   0.001341458693781   0.001222505348907

  Columns 31 through 35

   0.001117502552491   0.001024242468384   0.000940977110750   0.000866299235902   0.000799059611389

  Columns 36 through 40

   0.000738308050135   0.000683250434291   0.000633216775797   0.000587637067434   0.000546022742851

  Columns 41 through 45

   0.000507952246770   0.000473059664976   0.000441025664899   0.000411570203652   0.000384446604129

  Columns 46 through 50

   0.000359436701448   0.000336346835144   0.000315004515795   0.000295255633991   0.000276962108882

  Columns 51 through 55

   0.000259999895622                   0                   0                   0                   0

  Columns 56 through 60

                   0                   0                   0                   0                   0

  Column 61

                   0


inner_code_BER =

  Columns 1 through 5

   0.453077185414537   0.450784504721612   0.448323653110363   0.445675208332341   0.442816225411191

  Columns 6 through 10

   0.439719329734277   0.436351504531017   0.432672442603720   0.428632263229845   0.424168281132739

  Columns 11 through 15

   0.419200319116889   0.413623707462851   0.407298460396732   0.400031823567833   0.391548619654289

  Columns 16 through 20

   0.381437352772370   0.369043036459108   0.353225512835678   0.331703980249815   0.298706053320047

  Columns 21 through 25

   0.233060591019574   0.074620824162196   0.002606746380092   0.002288418577615   0.002030214221346

  Columns 26 through 30

   0.001815444794717   0.001633503124381   0.001477207010347   0.001341458693781   0.001222505348907

  Columns 31 through 35

   0.001117502552491   0.001024242468384   0.000940977110750   0.000866299235902   0.000799059611389

  Columns 36 through 40

   0.000738308050135   0.000683250434291   0.000633216775797   0.000587637067434   0.000546022742851

  Columns 41 through 45

   0.000507952246770   0.000473059664976   0.000441025664899   0.000411570203652   0.000384446604129

  Columns 46 through 50

   0.000359436701448   0.000336346835144   0.000315004515795   0.000295255633991   0.000276962108882

  Columns 51 through 55

   0.000259999895622   0.000244257287808                   0                   0                   0

  Columns 56 through 60

                   0                   0                   0                   0                   0

  Column 61

                   0


inner_code_BER =

  Columns 1 through 5

   0.453077185414537   0.450784504721612   0.448323653110363   0.445675208332341   0.442816225411191

  Columns 6 through 10

   0.439719329734277   0.436351504531017   0.432672442603720   0.428632263229845   0.424168281132739

  Columns 11 through 15

   0.419200319116889   0.413623707462851   0.407298460396732   0.400031823567833   0.391548619654289

  Columns 16 through 20

   0.381437352772370   0.369043036459108   0.353225512835678   0.331703980249815   0.298706053320047

  Columns 21 through 25

   0.233060591019574   0.074620824162196   0.002606746380092   0.002288418577615   0.002030214221346

  Columns 26 through 30

   0.001815444794717   0.001633503124381   0.001477207010347   0.001341458693781   0.001222505348907

  Columns 31 through 35

   0.001117502552491   0.001024242468384   0.000940977110750   0.000866299235902   0.000799059611389

  Columns 36 through 40

   0.000738308050135   0.000683250434291   0.000633216775797   0.000587637067434   0.000546022742851

  Columns 41 through 45

   0.000507952246770   0.000473059664976   0.000441025664899   0.000411570203652   0.000384446604129

  Columns 46 through 50

   0.000359436701448   0.000336346835144   0.000315004515795   0.000295255633991   0.000276962108882

  Columns 51 through 55

   0.000259999895622   0.000244257287808   0.000229633463986                   0                   0

  Columns 56 through 60

                   0                   0                   0                   0                   0

  Column 61

                   0


inner_code_BER =

  Columns 1 through 5

   0.453077185414537   0.450784504721612   0.448323653110363   0.445675208332341   0.442816225411191

  Columns 6 through 10

   0.439719329734277   0.436351504531017   0.432672442603720   0.428632263229845   0.424168281132739

  Columns 11 through 15

   0.419200319116889   0.413623707462851   0.407298460396732   0.400031823567833   0.391548619654289

  Columns 16 through 20

   0.381437352772370   0.369043036459108   0.353225512835678   0.331703980249815   0.298706053320047

  Columns 21 through 25

   0.233060591019574   0.074620824162196   0.002606746380092   0.002288418577615   0.002030214221346

  Columns 26 through 30

   0.001815444794717   0.001633503124381   0.001477207010347   0.001341458693781   0.001222505348907

  Columns 31 through 35

   0.001117502552491   0.001024242468384   0.000940977110750   0.000866299235902   0.000799059611389

  Columns 36 through 40

   0.000738308050135   0.000683250434291   0.000633216775797   0.000587637067434   0.000546022742851

  Columns 41 through 45

   0.000507952246770   0.000473059664976   0.000441025664899   0.000411570203652   0.000384446604129

  Columns 46 through 50

   0.000359436701448   0.000336346835144   0.000315004515795   0.000295255633991   0.000276962108882

  Columns 51 through 55

   0.000259999895622   0.000244257287808   0.000229633463986   0.000216037237249                   0

  Columns 56 through 60

                   0                   0                   0                   0                   0

  Column 61

                   0


inner_code_BER =

  Columns 1 through 5

   0.453077185414537   0.450784504721612   0.448323653110363   0.445675208332341   0.442816225411191

  Columns 6 through 10

   0.439719329734277   0.436351504531017   0.432672442603720   0.428632263229845   0.424168281132739

  Columns 11 through 15

   0.419200319116889   0.413623707462851   0.407298460396732   0.400031823567833   0.391548619654289

  Columns 16 through 20

   0.381437352772370   0.369043036459108   0.353225512835678   0.331703980249815   0.298706053320047

  Columns 21 through 25

   0.233060591019574   0.074620824162196   0.002606746380092   0.002288418577615   0.002030214221346

  Columns 26 through 30

   0.001815444794717   0.001633503124381   0.001477207010347   0.001341458693781   0.001222505348907

  Columns 31 through 35

   0.001117502552491   0.001024242468384   0.000940977110750   0.000866299235902   0.000799059611389

  Columns 36 through 40

   0.000738308050135   0.000683250434291   0.000633216775797   0.000587637067434   0.000546022742851

  Columns 41 through 45

   0.000507952246770   0.000473059664976   0.000441025664899   0.000411570203652   0.000384446604129

  Columns 46 through 50

   0.000359436701448   0.000336346835144   0.000315004515795   0.000295255633991   0.000276962108882

  Columns 51 through 55

   0.000259999895622   0.000244257287808   0.000229633463986   0.000216037237249   0.000203385974828

  Columns 56 through 60

                   0                   0                   0                   0                   0

  Column 61

                   0


inner_code_BER =

  Columns 1 through 5

   0.453077185414537   0.450784504721612   0.448323653110363   0.445675208332341   0.442816225411191

  Columns 6 through 10

   0.439719329734277   0.436351504531017   0.432672442603720   0.428632263229845   0.424168281132739

  Columns 11 through 15

   0.419200319116889   0.413623707462851   0.407298460396732   0.400031823567833   0.391548619654289

  Columns 16 through 20

   0.381437352772370   0.369043036459108   0.353225512835678   0.331703980249815   0.298706053320047

  Columns 21 through 25

   0.233060591019574   0.074620824162196   0.002606746380092   0.002288418577615   0.002030214221346

  Columns 26 through 30

   0.001815444794717   0.001633503124381   0.001477207010347   0.001341458693781   0.001222505348907

  Columns 31 through 35

   0.001117502552491   0.001024242468384   0.000940977110750   0.000866299235902   0.000799059611389

  Columns 36 through 40

   0.000738308050135   0.000683250434291   0.000633216775797   0.000587637067434   0.000546022742851

  Columns 41 through 45

   0.000507952246770   0.000473059664976   0.000441025664899   0.000411570203652   0.000384446604129

  Columns 46 through 50

   0.000359436701448   0.000336346835144   0.000315004515795   0.000295255633991   0.000276962108882

  Columns 51 through 55

   0.000259999895622   0.000244257287808   0.000229633463986   0.000216037237249   0.000203385974828

  Columns 56 through 60

   0.000191604660689                   0                   0                   0                   0

  Column 61

                   0


inner_code_BER =

  Columns 1 through 5

   0.453077185414537   0.450784504721612   0.448323653110363   0.445675208332341   0.442816225411191

  Columns 6 through 10

   0.439719329734277   0.436351504531017   0.432672442603720   0.428632263229845   0.424168281132739

  Columns 11 through 15

   0.419200319116889   0.413623707462851   0.407298460396732   0.400031823567833   0.391548619654289

  Columns 16 through 20

   0.381437352772370   0.369043036459108   0.353225512835678   0.331703980249815   0.298706053320047

  Columns 21 through 25

   0.233060591019574   0.074620824162196   0.002606746380092   0.002288418577615   0.002030214221346

  Columns 26 through 30

   0.001815444794717   0.001633503124381   0.001477207010347   0.001341458693781   0.001222505348907

  Columns 31 through 35

   0.001117502552491   0.001024242468384   0.000940977110750   0.000866299235902   0.000799059611389

  Columns 36 through 40

   0.000738308050135   0.000683250434291   0.000633216775797   0.000587637067434   0.000546022742851

  Columns 41 through 45

   0.000507952246770   0.000473059664976   0.000441025664899   0.000411570203652   0.000384446604129

  Columns 46 through 50

   0.000359436701448   0.000336346835144   0.000315004515795   0.000295255633991   0.000276962108882

  Columns 51 through 55

   0.000259999895622   0.000244257287808   0.000229633463986   0.000216037237249   0.000203385974828

  Columns 56 through 60

   0.000191604660689   0.000180625079052                   0                   0                   0

  Column 61

                   0


inner_code_BER =

  Columns 1 through 5

   0.453077185414537   0.450784504721612   0.448323653110363   0.445675208332341   0.442816225411191

  Columns 6 through 10

   0.439719329734277   0.436351504531017   0.432672442603720   0.428632263229845   0.424168281132739

  Columns 11 through 15

   0.419200319116889   0.413623707462851   0.407298460396732   0.400031823567833   0.391548619654289

  Columns 16 through 20

   0.381437352772370   0.369043036459108   0.353225512835678   0.331703980249815   0.298706053320047

  Columns 21 through 25

   0.233060591019574   0.074620824162196   0.002606746380092   0.002288418577615   0.002030214221346

  Columns 26 through 30

   0.001815444794717   0.001633503124381   0.001477207010347   0.001341458693781   0.001222505348907

  Columns 31 through 35

   0.001117502552491   0.001024242468384   0.000940977110750   0.000866299235902   0.000799059611389

  Columns 36 through 40

   0.000738308050135   0.000683250434291   0.000633216775797   0.000587637067434   0.000546022742851

  Columns 41 through 45

   0.000507952246770   0.000473059664976   0.000441025664899   0.000411570203652   0.000384446604129

  Columns 46 through 50

   0.000359436701448   0.000336346835144   0.000315004515795   0.000295255633991   0.000276962108882

  Columns 51 through 55

   0.000259999895622   0.000244257287808   0.000229633463986   0.000216037237249   0.000203385974828

  Columns 56 through 60

   0.000191604660689   0.000180625079052   0.000170385100650                   0                   0

  Column 61

                   0


inner_code_BER =

  Columns 1 through 5

   0.453077185414537   0.450784504721612   0.448323653110363   0.445675208332341   0.442816225411191

  Columns 6 through 10

   0.439719329734277   0.436351504531017   0.432672442603720   0.428632263229845   0.424168281132739

  Columns 11 through 15

   0.419200319116889   0.413623707462851   0.407298460396732   0.400031823567833   0.391548619654289

  Columns 16 through 20

   0.381437352772370   0.369043036459108   0.353225512835678   0.331703980249815   0.298706053320047

  Columns 21 through 25

   0.233060591019574   0.074620824162196   0.002606746380092   0.002288418577615   0.002030214221346

  Columns 26 through 30

   0.001815444794717   0.001633503124381   0.001477207010347   0.001341458693781   0.001222505348907

  Columns 31 through 35

   0.001117502552491   0.001024242468384   0.000940977110750   0.000866299235902   0.000799059611389

  Columns 36 through 40

   0.000738308050135   0.000683250434291   0.000633216775797   0.000587637067434   0.000546022742851

  Columns 41 through 45

   0.000507952246770   0.000473059664976   0.000441025664899   0.000411570203652   0.000384446604129

  Columns 46 through 50

   0.000359436701448   0.000336346835144   0.000315004515795   0.000295255633991   0.000276962108882

  Columns 51 through 55

   0.000259999895622   0.000244257287808   0.000229633463986   0.000216037237249   0.000203385974828

  Columns 56 through 60

   0.000191604660689   0.000180625079052   0.000170385100650   0.000160828056635                   0

  Column 61

                   0


inner_code_BER =

  Columns 1 through 5

   0.453077185414537   0.450784504721612   0.448323653110363   0.445675208332341   0.442816225411191

  Columns 6 through 10

   0.439719329734277   0.436351504531017   0.432672442603720   0.428632263229845   0.424168281132739

  Columns 11 through 15

   0.419200319116889   0.413623707462851   0.407298460396732   0.400031823567833   0.391548619654289

  Columns 16 through 20

   0.381437352772370   0.369043036459108   0.353225512835678   0.331703980249815   0.298706053320047

  Columns 21 through 25

   0.233060591019574   0.074620824162196   0.002606746380092   0.002288418577615   0.002030214221346

  Columns 26 through 30

   0.001815444794717   0.001633503124381   0.001477207010347   0.001341458693781   0.001222505348907

  Columns 31 through 35

   0.001117502552491   0.001024242468384   0.000940977110750   0.000866299235902   0.000799059611389

  Columns 36 through 40

   0.000738308050135   0.000683250434291   0.000633216775797   0.000587637067434   0.000546022742851

  Columns 41 through 45

   0.000507952246770   0.000473059664976   0.000441025664899   0.000411570203652   0.000384446604129

  Columns 46 through 50

   0.000359436701448   0.000336346835144   0.000315004515795   0.000295255633991   0.000276962108882

  Columns 51 through 55

   0.000259999895622   0.000244257287808   0.000229633463986   0.000216037237249   0.000203385974828

  Columns 56 through 60

   0.000191604660689   0.000180625079052   0.000170385100650   0.000160828056635   0.000151902187627

  Column 61

                   0


inner_code_BER =

  Columns 1 through 5

   0.453077185414537   0.450784504721612   0.448323653110363   0.445675208332341   0.442816225411191

  Columns 6 through 10

   0.439719329734277   0.436351504531017   0.432672442603720   0.428632263229845   0.424168281132739

  Columns 11 through 15

   0.419200319116889   0.413623707462851   0.407298460396732   0.400031823567833   0.391548619654289

  Columns 16 through 20

   0.381437352772370   0.369043036459108   0.353225512835678   0.331703980249815   0.298706053320047

  Columns 21 through 25

   0.233060591019574   0.074620824162196   0.002606746380092   0.002288418577615   0.002030214221346

  Columns 26 through 30

   0.001815444794717   0.001633503124381   0.001477207010347   0.001341458693781   0.001222505348907

  Columns 31 through 35

   0.001117502552491   0.001024242468384   0.000940977110750   0.000866299235902   0.000799059611389

  Columns 36 through 40

   0.000738308050135   0.000683250434291   0.000633216775797   0.000587637067434   0.000546022742851

  Columns 41 through 45

   0.000507952246770   0.000473059664976   0.000441025664899   0.000411570203652   0.000384446604129

  Columns 46 through 50

   0.000359436701448   0.000336346835144   0.000315004515795   0.000295255633991   0.000276962108882

  Columns 51 through 55

   0.000259999895622   0.000244257287808   0.000229633463986   0.000216037237249   0.000203385974828

  Columns 56 through 60

   0.000191604660689   0.000180625079052   0.000170385100650   0.000160828056635   0.000151902187627

  Column 61

   0.000143560157380

Elapsed time is 26150.239100 seconds.
