# Supplementary material for: An Efficient Design of Systematic Rateless Codes
Source: Hindawi journal article supplement (doi:10.1155/2020/8068414), 2020-05-19
Supplement: f1 [file 8068414.f1.zip › supplementary files/Matlab_code_for_Figure1/BER_by_DDE/仿真结果/BER_by_DDE_rayl_rate_1_2_dist1_s.txt]

��ǰ�ŵ�Ϊ�����ŵ�

EbN0indB_vec =

  Columns 1 through 5

                   0   0.100000000000000   0.200000000000000   0.300000000000000   0.400000000000000

  Columns 6 through 10

   0.500000000000000   0.600000000000000   0.700000000000000   0.800000000000000   0.900000000000000

  Columns 11 through 15

   1.000000000000000   1.100000000000000   1.200000000000000   1.300000000000000   1.400000000000000

  Columns 16 through 20

   1.500000000000000   1.600000000000000   1.700000000000000   1.800000000000000   1.900000000000000

  Columns 21 through 25

   2.000000000000000   2.100000000000000   2.200000000000000   2.300000000000000   2.400000000000000

  Columns 26 through 30

   2.500000000000000   2.600000000000000   2.700000000000000   2.800000000000000   2.900000000000000

  Columns 31 through 35

   3.000000000000000   3.100000000000000   3.200000000000000   3.300000000000000   3.400000000000000

  Columns 36 through 40

   3.500000000000000   3.600000000000000   3.700000000000000   3.800000000000000   3.900000000000000

  Columns 41 through 45

   4.000000000000000   4.100000000000000   4.200000000000000   4.300000000000000   4.400000000000000

  Columns 46 through 50

   4.500000000000000   4.600000000000000   4.700000000000000   4.800000000000000   4.900000000000000

  Columns 51 through 55

   5.000000000000000   5.100000000000000   5.200000000000000   5.300000000000000   5.400000000000000

  Columns 56 through 60

   5.500000000000000   5.600000000000000   5.700000000000000   5.800000000000000   5.900000000000000

  Column 61

   6.000000000000000

�Ʊ��ɹ�
��ǰѡ��Raptor�뵱ǰѡ��ϵͳ��
������=0.50000, ��������=0.98039, ��������=0.51000

out_node_index =

     1     2     3     4     5    11    40


ans =

  Columns 1 through 5

   0.009670000000000   0.450250000000000   0.209370000000000   0.023320000000000   0.147350000000000

  Columns 6 through 7

   0.112249000000000   0.047550000000000


ans =

  Columns 1 through 5

   0.009670000000000   0.450250000000000   0.209370000000000   0.023320000000000   0.147350000000000

  Columns 6 through 7

   0.112249000000000   0.047550000000000


inner_code_BER =

  Columns 1 through 5

   0.142920850967061                   0                   0                   0                   0

  Columns 6 through 10

                   0                   0                   0                   0                   0

  Columns 11 through 15

                   0                   0                   0                   0                   0

  Columns 16 through 20

                   0                   0                   0                   0                   0

  Columns 21 through 25

                   0                   0                   0                   0                   0

  Columns 26 through 30

                   0                   0                   0                   0                   0

  Columns 31 through 35

                   0                   0                   0                   0                   0

  Columns 36 through 40

                   0                   0                   0                   0                   0

  Columns 41 through 45

                   0                   0                   0                   0                   0

  Columns 46 through 50

                   0                   0                   0                   0                   0

  Columns 51 through 55

                   0                   0                   0                   0                   0

  Columns 56 through 60

                   0                   0                   0                   0                   0

  Column 61

                   0


outer_code_BER =

  Columns 1 through 5

   0.142920850967060                   0                   0                   0                   0

  Columns 6 through 10

                   0                   0                   0                   0                   0

  Columns 11 through 15

                   0                   0                   0                   0                   0

  Columns 16 through 20

                   0                   0                   0                   0                   0

  Columns 21 through 25

                   0                   0                   0                   0                   0

  Columns 26 through 30

                   0                   0                   0                   0                   0

  Columns 31 through 35

                   0                   0                   0                   0                   0

  Columns 36 through 40

                   0                   0                   0                   0                   0

  Columns 41 through 45

                   0                   0                   0                   0                   0

  Columns 46 through 50

                   0                   0                   0                   0                   0

  Columns 51 through 55

                   0                   0                   0                   0                   0

  Columns 56 through 60

                   0                   0                   0                   0                   0

  Column 61

                   0


inner_code_BER =

  Columns 1 through 5

   0.142920850967061   0.139557912044243                   0                   0                   0

  Columns 6 through 10

                   0                   0                   0                   0                   0

  Columns 11 through 15

                   0                   0                   0                   0                   0

  Columns 16 through 20

                   0                   0                   0                   0                   0

  Columns 21 through 25

                   0                   0                   0                   0                   0

  Columns 26 through 30

                   0                   0                   0                   0                   0

  Columns 31 through 35

                   0                   0                   0                   0                   0

  Columns 36 through 40

                   0                   0                   0                   0                   0

  Columns 41 through 45

                   0                   0                   0                   0                   0

  Columns 46 through 50

                   0                   0                   0                   0                   0

  Columns 51 through 55

                   0                   0                   0                   0                   0

  Columns 56 through 60

                   0                   0                   0                   0                   0

  Column 61

                   0


outer_code_BER =

  Columns 1 through 5

   0.142920850967060   0.139557912044244                   0                   0                   0

  Columns 6 through 10

                   0                   0                   0                   0                   0

  Columns 11 through 15

                   0                   0                   0                   0                   0

  Columns 16 through 20

                   0                   0                   0                   0                   0

  Columns 21 through 25

                   0                   0                   0                   0                   0

  Columns 26 through 30

                   0                   0                   0                   0                   0

  Columns 31 through 35

                   0                   0                   0                   0                   0

  Columns 36 through 40

                   0                   0                   0                   0                   0

  Columns 41 through 45

                   0                   0                   0                   0                   0

  Columns 46 through 50

                   0                   0                   0                   0                   0

  Columns 51 through 55

                   0                   0                   0                   0                   0

  Columns 56 through 60

                   0                   0                   0                   0                   0

  Column 61

                   0


inner_code_BER =

  Columns 1 through 5

   0.142920850967061   0.139557912044243   0.136195893375298                   0                   0

  Columns 6 through 10

                   0                   0                   0                   0                   0

  Columns 11 through 15

                   0                   0                   0                   0                   0

  Columns 16 through 20

                   0                   0                   0                   0                   0

  Columns 21 through 25

                   0                   0                   0                   0                   0

  Columns 26 through 30

                   0                   0                   0                   0                   0

  Columns 31 through 35

                   0                   0                   0                   0                   0

  Columns 36 through 40

                   0                   0                   0                   0                   0

  Columns 41 through 45

                   0                   0                   0                   0                   0

  Columns 46 through 50

                   0                   0                   0                   0                   0

  Columns 51 through 55

                   0                   0                   0                   0                   0

  Columns 56 through 60

                   0                   0                   0                   0                   0

  Column 61

                   0


outer_code_BER =

  Columns 1 through 5

   0.142920850967060   0.139557912044244   0.136195893375297                   0                   0

  Columns 6 through 10

                   0                   0                   0                   0                   0

  Columns 11 through 15

                   0                   0                   0                   0                   0

  Columns 16 through 20

                   0                   0                   0                   0                   0

  Columns 21 through 25

                   0                   0                   0                   0                   0

  Columns 26 through 30

                   0                   0                   0                   0                   0

  Columns 31 through 35

                   0                   0                   0                   0                   0

  Columns 36 through 40

                   0                   0                   0                   0                   0

  Columns 41 through 45

                   0                   0                   0                   0                   0

  Columns 46 through 50

                   0                   0                   0                   0                   0

  Columns 51 through 55

                   0                   0                   0                   0                   0

  Columns 56 through 60

                   0                   0                   0                   0                   0

  Column 61

                   0


inner_code_BER =

  Columns 1 through 5

   0.142920850967061   0.139557912044243   0.136195893375298   0.132836108354312                   0

  Columns 6 through 10

                   0                   0                   0                   0                   0

  Columns 11 through 15

                   0                   0                   0                   0                   0

  Columns 16 through 20

                   0                   0                   0                   0                   0

  Columns 21 through 25

                   0                   0                   0                   0                   0

  Columns 26 through 30

                   0                   0                   0                   0                   0

  Columns 31 through 35

                   0                   0                   0                   0                   0

  Columns 36 through 40

                   0                   0                   0                   0                   0

  Columns 41 through 45

                   0                   0                   0                   0                   0

  Columns 46 through 50

                   0                   0                   0                   0                   0

  Columns 51 through 55

                   0                   0                   0                   0                   0

  Columns 56 through 60

                   0                   0                   0                   0                   0

  Column 61

                   0


outer_code_BER =

  Columns 1 through 5

   0.142920850967060   0.139557912044244   0.136195893375297   0.132836108354312                   0

  Columns 6 through 10

                   0                   0                   0                   0                   0

  Columns 11 through 15

                   0                   0                   0                   0                   0

  Columns 16 through 20

                   0                   0                   0                   0                   0

  Columns 21 through 25

                   0                   0                   0                   0                   0

  Columns 26 through 30

                   0                   0                   0                   0                   0

  Columns 31 through 35

                   0                   0                   0                   0                   0

  Columns 36 through 40

                   0                   0                   0                   0                   0

  Columns 41 through 45

                   0                   0                   0                   0                   0

  Columns 46 through 50

                   0                   0                   0                   0                   0

  Columns 51 through 55

                   0                   0                   0                   0                   0

  Columns 56 through 60

                   0                   0                   0                   0                   0

  Column 61

                   0


inner_code_BER =

  Columns 1 through 5

   0.142920850967061   0.139557912044243   0.136195893375298   0.132836108354312   0.129479898919440

  Columns 6 through 10

                   0                   0                   0                   0                   0

  Columns 11 through 15

                   0                   0                   0                   0                   0

  Columns 16 through 20

                   0                   0                   0                   0                   0

  Columns 21 through 25

                   0                   0                   0                   0                   0

  Columns 26 through 30

                   0                   0                   0                   0                   0

  Columns 31 through 35

                   0                   0                   0                   0                   0

  Columns 36 through 40

                   0                   0                   0                   0                   0

  Columns 41 through 45

                   0                   0                   0                   0                   0

  Columns 46 through 50

                   0                   0                   0                   0                   0

  Columns 51 through 55

                   0                   0                   0                   0                   0

  Columns 56 through 60

                   0                   0                   0                   0                   0

  Column 61

                   0


outer_code_BER =

  Columns 1 through 5

   0.142920850967060   0.139557912044244   0.136195893375297   0.132836108354312   0.129479898919441

  Columns 6 through 10

                   0                   0                   0                   0                   0

  Columns 11 through 15

                   0                   0                   0                   0                   0

  Columns 16 through 20

                   0                   0                   0                   0                   0

  Columns 21 through 25

                   0                   0                   0                   0                   0

  Columns 26 through 30

                   0                   0                   0                   0                   0

  Columns 31 through 35

                   0                   0                   0                   0                   0

  Columns 36 through 40

                   0                   0                   0                   0                   0

  Columns 41 through 45

                   0                   0                   0                   0                   0

  Columns 46 through 50

                   0                   0                   0                   0                   0

  Columns 51 through 55

                   0                   0                   0                   0                   0

  Columns 56 through 60

                   0                   0                   0                   0                   0

  Column 61

                   0


inner_code_BER =

  Columns 1 through 5

   0.142920850967061   0.139557912044243   0.136195893375298   0.132836108354312   0.129479898919440

  Columns 6 through 10

   0.126128637696935                   0                   0                   0                   0

  Columns 11 through 15

                   0                   0                   0                   0                   0

  Columns 16 through 20

                   0                   0                   0                   0                   0

  Columns 21 through 25

                   0                   0                   0                   0                   0

  Columns 26 through 30

                   0                   0                   0                   0                   0

  Columns 31 through 35

                   0                   0                   0                   0                   0

  Columns 36 through 40

                   0                   0                   0                   0                   0

  Columns 41 through 45

                   0                   0                   0                   0                   0

  Columns 46 through 50

                   0                   0                   0                   0                   0

  Columns 51 through 55

                   0                   0                   0                   0                   0

  Columns 56 through 60

                   0                   0                   0                   0                   0

  Column 61

                   0


outer_code_BER =

  Columns 1 through 5

   0.142920850967060   0.139557912044244   0.136195893375297   0.132836108354312   0.129479898919441

  Columns 6 through 10

   0.126128637696935                   0                   0                   0                   0

  Columns 11 through 15

                   0                   0                   0                   0                   0

  Columns 16 through 20

                   0                   0                   0                   0                   0

  Columns 21 through 25

                   0                   0                   0                   0                   0

  Columns 26 through 30

                   0                   0                   0                   0                   0

  Columns 31 through 35

                   0                   0                   0                   0                   0

  Columns 36 through 40

                   0                   0                   0                   0                   0

  Columns 41 through 45

                   0                   0                   0                   0                   0

  Columns 46 through 50

                   0                   0                   0                   0                   0

  Columns 51 through 55

                   0                   0                   0                   0                   0

  Columns 56 through 60

                   0                   0                   0                   0                   0

  Column 61

                   0


inner_code_BER =

  Columns 1 through 5

   0.142920850967061   0.139557912044243   0.136195893375298   0.132836108354312   0.129479898919440

  Columns 6 through 10

   0.126128637696935   0.122783731089354                   0                   0                   0

  Columns 11 through 15

                   0                   0                   0                   0                   0

  Columns 16 through 20

                   0                   0                   0                   0                   0

  Columns 21 through 25

                   0                   0                   0                   0                   0

  Columns 26 through 30

                   0                   0                   0                   0                   0

  Columns 31 through 35

                   0                   0                   0                   0                   0

  Columns 36 through 40

                   0                   0                   0                   0                   0

  Columns 41 through 45

                   0                   0                   0                   0                   0

  Columns 46 through 50

                   0                   0                   0                   0                   0

  Columns 51 through 55

                   0                   0                   0                   0                   0

  Columns 56 through 60

                   0                   0                   0                   0                   0

  Column 61

                   0


outer_code_BER =

  Columns 1 through 5

   0.142920850967060   0.139557912044244   0.136195893375297   0.132836108354312   0.129479898919441

  Columns 6 through 10

   0.126128637696935   0.122783731089354                   0                   0                   0

  Columns 11 through 15

                   0                   0                   0                   0                   0

  Columns 16 through 20

                   0                   0                   0                   0                   0

  Columns 21 through 25

                   0                   0                   0                   0                   0

  Columns 26 through 30

                   0                   0                   0                   0                   0

  Columns 31 through 35

                   0                   0                   0                   0                   0

  Columns 36 through 40

                   0                   0                   0                   0                   0

  Columns 41 through 45

                   0                   0                   0                   0                   0

  Columns 46 through 50

                   0                   0                   0                   0                   0

  Columns 51 through 55

                   0                   0                   0                   0                   0

  Columns 56 through 60

                   0                   0                   0                   0                   0

  Column 61

                   0


inner_code_BER =

  Columns 1 through 5

   0.142920850967061   0.139557912044243   0.136195893375298   0.132836108354312   0.129479898919440

  Columns 6 through 10

   0.126128637696935   0.122783731089354   0.119446623430791                   0                   0

  Columns 11 through 15

                   0                   0                   0                   0                   0

  Columns 16 through 20

                   0                   0                   0                   0                   0

  Columns 21 through 25

                   0                   0                   0                   0                   0

  Columns 26 through 30

                   0                   0                   0                   0                   0

  Columns 31 through 35

                   0                   0                   0                   0                   0

  Columns 36 through 40

                   0                   0                   0                   0                   0

  Columns 41 through 45

                   0                   0                   0                   0                   0

  Columns 46 through 50

                   0                   0                   0                   0                   0

  Columns 51 through 55

                   0                   0                   0                   0                   0

  Columns 56 through 60

                   0                   0                   0                   0                   0

  Column 61

                   0


outer_code_BER =

  Columns 1 through 5

   0.142920850967060   0.139557912044244   0.136195893375297   0.132836108354312   0.129479898919441

  Columns 6 through 10

   0.126128637696935   0.122783731089354   0.119446623430791                   0                   0

  Columns 11 through 15

                   0                   0                   0                   0                   0

  Columns 16 through 20

                   0                   0                   0                   0                   0

  Columns 21 through 25

                   0                   0                   0                   0                   0

  Columns 26 through 30

                   0                   0                   0                   0                   0

  Columns 31 through 35

                   0                   0                   0                   0                   0

  Columns 36 through 40

                   0                   0                   0                   0                   0

  Columns 41 through 45

                   0                   0                   0                   0                   0

  Columns 46 through 50

                   0                   0                   0                   0                   0

  Columns 51 through 55

                   0                   0                   0                   0                   0

  Columns 56 through 60

                   0                   0                   0                   0                   0

  Column 61

                   0


inner_code_BER =

  Columns 1 through 5

   0.142920850967061   0.139557912044243   0.136195893375298   0.132836108354312   0.129479898919440

  Columns 6 through 10

   0.126128637696935   0.122783731089354   0.119446623430791   0.116118802320110                   0

  Columns 11 through 15

                   0                   0                   0                   0                   0

  Columns 16 through 20

                   0                   0                   0                   0                   0

  Columns 21 through 25

                   0                   0                   0                   0                   0

  Columns 26 through 30

                   0                   0                   0                   0                   0

  Columns 31 through 35

                   0                   0                   0                   0                   0

  Columns 36 through 40

                   0                   0                   0                   0                   0

  Columns 41 through 45

                   0                   0                   0                   0                   0

  Columns 46 through 50

                   0                   0                   0                   0                   0

  Columns 51 through 55

                   0                   0                   0                   0                   0

  Columns 56 through 60

                   0                   0                   0                   0                   0

  Column 61

                   0


outer_code_BER =

  Columns 1 through 5

   0.142920850967060   0.139557912044244   0.136195893375297   0.132836108354312   0.129479898919441

  Columns 6 through 10

   0.126128637696935   0.122783731089354   0.119446623430791   0.116118802320110                   0

  Columns 11 through 15

                   0                   0                   0                   0                   0

  Columns 16 through 20

                   0                   0                   0                   0                   0

  Columns 21 through 25

                   0                   0                   0                   0                   0

  Columns 26 through 30

                   0                   0                   0                   0                   0

  Columns 31 through 35

                   0                   0                   0                   0                   0

  Columns 36 through 40

                   0                   0                   0                   0                   0

  Columns 41 through 45

                   0                   0                   0                   0                   0

  Columns 46 through 50

                   0                   0                   0                   0                   0

  Columns 51 through 55

                   0                   0                   0                   0                   0

  Columns 56 through 60

                   0                   0                   0                   0                   0

  Column 61

                   0


inner_code_BER =

  Columns 1 through 5

   0.142920850967061   0.139557912044243   0.136195893375298   0.132836108354312   0.129479898919440

  Columns 6 through 10

   0.126128637696935   0.122783731089354   0.119446623430791   0.116118802320110   0.112801805221793

  Columns 11 through 15

                   0                   0                   0                   0                   0

  Columns 16 through 20

                   0                   0                   0                   0                   0

  Columns 21 through 25

                   0                   0                   0                   0                   0

  Columns 26 through 30

                   0                   0                   0                   0                   0

  Columns 31 through 35

                   0                   0                   0                   0                   0

  Columns 36 through 40

                   0                   0                   0                   0                   0

  Columns 41 through 45

                   0                   0                   0                   0                   0

  Columns 46 through 50

                   0                   0                   0                   0                   0

  Columns 51 through 55

                   0                   0                   0                   0                   0

  Columns 56 through 60

                   0                   0                   0                   0                   0

  Column 61

                   0


outer_code_BER =

  Columns 1 through 5

   0.142920850967060   0.139557912044244   0.136195893375297   0.132836108354312   0.129479898919441

  Columns 6 through 10

   0.126128637696935   0.122783731089354   0.119446623430791   0.116118802320110   0.112801805221793

  Columns 11 through 15

                   0                   0                   0                   0                   0

  Columns 16 through 20

                   0                   0                   0                   0                   0

  Columns 21 through 25

                   0                   0                   0                   0                   0

  Columns 26 through 30

                   0                   0                   0                   0                   0

  Columns 31 through 35

                   0                   0                   0                   0                   0

  Columns 36 through 40

                   0                   0                   0                   0                   0

  Columns 41 through 45

                   0                   0                   0                   0                   0

  Columns 46 through 50

                   0                   0                   0                   0                   0

  Columns 51 through 55

                   0                   0                   0                   0                   0

  Columns 56 through 60

                   0                   0                   0                   0                   0

  Column 61

                   0


inner_code_BER =

  Columns 1 through 5

   0.142920850967061   0.139557912044243   0.136195893375298   0.132836108354312   0.129479898919440

  Columns 6 through 10

   0.126128637696935   0.122783731089354   0.119446623430791   0.116118802320110   0.112801805221793

  Columns 11 through 15

   0.109497227389950                   0                   0                   0                   0

  Columns 16 through 20

                   0                   0                   0                   0                   0

  Columns 21 through 25

                   0                   0                   0                   0                   0

  Columns 26 through 30

                   0                   0                   0                   0                   0

  Columns 31 through 35

                   0                   0                   0                   0                   0

  Columns 36 through 40

                   0                   0                   0                   0                   0

  Columns 41 through 45

                   0                   0                   0                   0                   0

  Columns 46 through 50

                   0                   0                   0                   0                   0

  Columns 51 through 55

                   0                   0                   0                   0                   0

  Columns 56 through 60

                   0                   0                   0                   0                   0

  Column 61

                   0


outer_code_BER =

  Columns 1 through 5

   0.142920850967060   0.139557912044244   0.136195893375297   0.132836108354312   0.129479898919441

  Columns 6 through 10

   0.126128637696935   0.122783731089354   0.119446623430791   0.116118802320110   0.112801805221793

  Columns 11 through 15

   0.109497227389951                   0                   0                   0                   0

  Columns 16 through 20

                   0                   0                   0                   0                   0

  Columns 21 through 25

                   0                   0                   0                   0                   0

  Columns 26 through 30

                   0                   0                   0                   0                   0

  Columns 31 through 35

                   0                   0                   0                   0                   0

  Columns 36 through 40

                   0                   0                   0                   0                   0

  Columns 41 through 45

                   0                   0                   0                   0                   0

  Columns 46 through 50

                   0                   0                   0                   0                   0

  Columns 51 through 55

                   0                   0                   0                   0                   0

  Columns 56 through 60

                   0                   0                   0                   0                   0

  Column 61

                   0


inner_code_BER =

  Columns 1 through 5

   0.142920850967061   0.139557912044243   0.136195893375298   0.132836108354312   0.129479898919440

  Columns 6 through 10

   0.126128637696935   0.122783731089354   0.119446623430791   0.116118802320110   0.112801805221793

  Columns 11 through 15

   0.109497227389950   0.106206731120209                   0                   0                   0

  Columns 16 through 20

                   0                   0                   0                   0                   0

  Columns 21 through 25

                   0                   0                   0                   0                   0

  Columns 26 through 30

                   0                   0                   0                   0                   0

  Columns 31 through 35

                   0                   0                   0                   0                   0

  Columns 36 through 40

                   0                   0                   0                   0                   0

  Columns 41 through 45

                   0                   0                   0                   0                   0

  Columns 46 through 50

                   0                   0                   0                   0                   0

  Columns 51 through 55

                   0                   0                   0                   0                   0

  Columns 56 through 60

                   0                   0                   0                   0                   0

  Column 61

                   0


outer_code_BER =

  Columns 1 through 5

   0.142920850967060   0.139557912044244   0.136195893375297   0.132836108354312   0.129479898919441

  Columns 6 through 10

   0.126128637696935   0.122783731089354   0.119446623430791   0.116118802320110   0.112801805221793

  Columns 11 through 15

   0.109497227389951   0.106206731120209                   0                   0                   0

  Columns 16 through 20

                   0                   0                   0                   0                   0

  Columns 21 through 25

                   0                   0                   0                   0                   0

  Columns 26 through 30

                   0                   0                   0                   0                   0

  Columns 31 through 35

                   0                   0                   0                   0                   0

  Columns 36 through 40

                   0                   0                   0                   0                   0

  Columns 41 through 45

                   0                   0                   0                   0                   0

  Columns 46 through 50

                   0                   0                   0                   0                   0

  Columns 51 through 55

                   0                   0                   0                   0                   0

  Columns 56 through 60

                   0                   0                   0                   0                   0

  Column 61

                   0


inner_code_BER =

  Columns 1 through 5

   0.142920850967061   0.139557912044243   0.136195893375298   0.132836108354312   0.129479898919440

  Columns 6 through 10

   0.126128637696935   0.122783731089354   0.119446623430791   0.116118802320110   0.112801805221793

  Columns 11 through 15

   0.109497227389950   0.106206731120209   0.102932056262169                   0                   0

  Columns 16 through 20

                   0                   0                   0                   0                   0

  Columns 21 through 25

                   0                   0                   0                   0                   0

  Columns 26 through 30

                   0                   0                   0                   0                   0

  Columns 31 through 35

                   0                   0                   0                   0                   0

  Columns 36 through 40

                   0                   0                   0                   0                   0

  Columns 41 through 45

                   0                   0                   0                   0                   0

  Columns 46 through 50

                   0                   0                   0                   0                   0

  Columns 51 through 55

                   0                   0                   0                   0                   0

  Columns 56 through 60

                   0                   0                   0                   0                   0

  Column 61

                   0


outer_code_BER =

  Columns 1 through 5

   0.142920850967060   0.139557912044244   0.136195893375297   0.132836108354312   0.129479898919441

  Columns 6 through 10

   0.126128637696935   0.122783731089354   0.119446623430791   0.116118802320110   0.112801805221793

  Columns 11 through 15

   0.109497227389951   0.106206731120209   0.102932056262170                   0                   0

  Columns 16 through 20

                   0                   0                   0                   0                   0

  Columns 21 through 25

                   0                   0                   0                   0                   0

  Columns 26 through 30

                   0                   0                   0                   0                   0

  Columns 31 through 35

                   0                   0                   0                   0                   0

  Columns 36 through 40

                   0                   0                   0                   0                   0

  Columns 41 through 45

                   0                   0                   0                   0                   0

  Columns 46 through 50

                   0                   0                   0                   0                   0

  Columns 51 through 55

                   0                   0                   0                   0                   0

  Columns 56 through 60

                   0                   0                   0                   0                   0

  Column 61

                   0


inner_code_BER =

  Columns 1 through 5

   0.142920850967061   0.139557912044243   0.136195893375298   0.132836108354312   0.129479898919440

  Columns 6 through 10

   0.126128637696935   0.122783731089354   0.119446623430791   0.116118802320110   0.112801805221793

  Columns 11 through 15

   0.109497227389950   0.106206731120209   0.102932056262169   0.099675031826543                   0

  Columns 16 through 20

                   0                   0                   0                   0                   0

  Columns 21 through 25

                   0                   0                   0                   0                   0

  Columns 26 through 30

                   0                   0                   0                   0                   0

  Columns 31 through 35

                   0                   0                   0                   0                   0

  Columns 36 through 40

                   0                   0                   0                   0                   0

  Columns 41 through 45

                   0                   0                   0                   0                   0

  Columns 46 through 50

                   0                   0                   0                   0                   0

  Columns 51 through 55

                   0                   0                   0                   0                   0

  Columns 56 through 60

                   0                   0                   0                   0                   0

  Column 61

                   0


outer_code_BER =

  Columns 1 through 5

   0.142920850967060   0.139557912044244   0.136195893375297   0.132836108354312   0.129479898919441

  Columns 6 through 10

   0.126128637696935   0.122783731089354   0.119446623430791   0.116118802320110   0.112801805221793

  Columns 11 through 15

   0.109497227389951   0.106206731120209   0.102932056262170   0.099675031826544                   0

  Columns 16 through 20

                   0                   0                   0                   0                   0

  Columns 21 through 25

                   0                   0                   0                   0                   0

  Columns 26 through 30

                   0                   0                   0                   0                   0

  Columns 31 through 35

                   0                   0                   0                   0                   0

  Columns 36 through 40

                   0                   0                   0                   0                   0

  Columns 41 through 45

                   0                   0                   0                   0                   0

  Columns 46 through 50

                   0                   0                   0                   0                   0

  Columns 51 through 55

                   0                   0                   0                   0                   0

  Columns 56 through 60

                   0                   0                   0                   0                   0

  Column 61

                   0


inner_code_BER =

  Columns 1 through 5

   0.142920850967061   0.139557912044243   0.136195893375298   0.132836108354312   0.129479898919440

  Columns 6 through 10

   0.126128637696935   0.122783731089354   0.119446623430791   0.116118802320110   0.112801805221793

  Columns 11 through 15

   0.109497227389950   0.106206731120209   0.102932056262169   0.099675031826543   0.096437588390384

  Columns 16 through 20

                   0                   0                   0                   0                   0

  Columns 21 through 25

                   0                   0                   0                   0                   0

  Columns 26 through 30

                   0                   0                   0                   0                   0

  Columns 31 through 35

                   0                   0                   0                   0                   0

  Columns 36 through 40

                   0                   0                   0                   0                   0

  Columns 41 through 45

                   0                   0                   0                   0                   0

  Columns 46 through 50

                   0                   0                   0                   0                   0

  Columns 51 through 55

                   0                   0                   0                   0                   0

  Columns 56 through 60

                   0                   0                   0                   0                   0

  Column 61

                   0


outer_code_BER =

  Columns 1 through 5

   0.142920850967060   0.139557912044244   0.136195893375297   0.132836108354312   0.129479898919441

  Columns 6 through 10

   0.126128637696935   0.122783731089354   0.119446623430791   0.116118802320110   0.112801805221793

  Columns 11 through 15

   0.109497227389951   0.106206731120209   0.102932056262170   0.099675031826544   0.096437588390384

  Columns 16 through 20

                   0                   0                   0                   0                   0

  Columns 21 through 25

                   0                   0                   0                   0                   0

  Columns 26 through 30

                   0                   0                   0                   0                   0

  Columns 31 through 35

                   0                   0                   0                   0                   0

  Columns 36 through 40

                   0                   0                   0                   0                   0

  Columns 41 through 45

                   0                   0                   0                   0                   0

  Columns 46 through 50

                   0                   0                   0                   0                   0

  Columns 51 through 55

                   0                   0                   0                   0                   0

  Columns 56 through 60

                   0                   0                   0                   0                   0

  Column 61

                   0


inner_code_BER =

  Columns 1 through 5

   0.142920850967061   0.139557912044243   0.136195893375298   0.132836108354312   0.129479898919440

  Columns 6 through 10

   0.126128637696935   0.122783731089354   0.119446623430791   0.116118802320110   0.112801805221793

  Columns 11 through 15

   0.109497227389950   0.106206731120209   0.102932056262169   0.099675031826543   0.096437588390384

  Columns 16 through 20

   0.093221770836683                   0                   0                   0                   0

  Columns 21 through 25

                   0                   0                   0                   0                   0

  Columns 26 through 30

                   0                   0                   0                   0                   0

  Columns 31 through 35

                   0                   0                   0                   0                   0

  Columns 36 through 40

                   0                   0                   0                   0                   0

  Columns 41 through 45

                   0                   0                   0                   0                   0

  Columns 46 through 50

                   0                   0                   0                   0                   0

  Columns 51 through 55

                   0                   0                   0                   0                   0

  Columns 56 through 60

                   0                   0                   0                   0                   0

  Column 61

                   0


outer_code_BER =

  Columns 1 through 5

   0.142920850967060   0.139557912044244   0.136195893375297   0.132836108354312   0.129479898919441

  Columns 6 through 10

   0.126128637696935   0.122783731089354   0.119446623430791   0.116118802320110   0.112801805221793

  Columns 11 through 15

   0.109497227389951   0.106206731120209   0.102932056262170   0.099675031826544   0.096437588390384

  Columns 16 through 20

   0.093221770836683                   0                   0                   0                   0

  Columns 21 through 25

                   0                   0                   0                   0                   0

  Columns 26 through 30

                   0                   0                   0                   0                   0

  Columns 31 through 35

                   0                   0                   0                   0                   0

  Columns 36 through 40

                   0                   0                   0                   0                   0

  Columns 41 through 45

                   0                   0                   0                   0                   0

  Columns 46 through 50

                   0                   0                   0                   0                   0

  Columns 51 through 55

                   0                   0                   0                   0                   0

  Columns 56 through 60

                   0                   0                   0                   0                   0

  Column 61

                   0


inner_code_BER =

  Columns 1 through 5

   0.142920850967061   0.139557912044243   0.136195893375298   0.132836108354312   0.129479898919440

  Columns 6 through 10

   0.126128637696935   0.122783731089354   0.119446623430791   0.116118802320110   0.112801805221793

  Columns 11 through 15

   0.109497227389950   0.106206731120209   0.102932056262169   0.099675031826543   0.096437588390384

  Columns 16 through 20

   0.093221770836683   0.090029750757913                   0                   0                   0

  Columns 21 through 25

                   0                   0                   0                   0                   0

  Columns 26 through 30

                   0                   0                   0                   0                   0

  Columns 31 through 35

                   0                   0                   0                   0                   0

  Columns 36 through 40

                   0                   0                   0                   0                   0

  Columns 41 through 45

                   0                   0                   0                   0                   0

  Columns 46 through 50

                   0                   0                   0                   0                   0

  Columns 51 through 55

                   0                   0                   0                   0                   0

  Columns 56 through 60

                   0                   0                   0                   0                   0

  Column 61

                   0


outer_code_BER =

  Columns 1 through 5

   0.142920850967060   0.139557912044244   0.136195893375297   0.132836108354312   0.129479898919441

  Columns 6 through 10

   0.126128637696935   0.122783731089354   0.119446623430791   0.116118802320110   0.112801805221793

  Columns 11 through 15

   0.109497227389951   0.106206731120209   0.102932056262170   0.099675031826544   0.096437588390384

  Columns 16 through 20

   0.093221770836683   0.090029750757913                   0                   0                   0

  Columns 21 through 25

                   0                   0                   0                   0                   0

  Columns 26 through 30

                   0                   0                   0                   0                   0

  Columns 31 through 35

                   0                   0                   0                   0                   0

  Columns 36 through 40

                   0                   0                   0                   0                   0

  Columns 41 through 45

                   0                   0                   0                   0                   0

  Columns 46 through 50

                   0                   0                   0                   0                   0

  Columns 51 through 55

                   0                   0                   0                   0                   0

  Columns 56 through 60

                   0                   0                   0                   0                   0

  Column 61

                   0


inner_code_BER =

  Columns 1 through 5

   0.142920850967061   0.139557912044243   0.136195893375298   0.132836108354312   0.129479898919440

  Columns 6 through 10

   0.126128637696935   0.122783731089354   0.119446623430791   0.116118802320110   0.112801805221793

  Columns 11 through 15

   0.109497227389950   0.106206731120209   0.102932056262169   0.099675031826543   0.096437588390384

  Columns 16 through 20

   0.093221770836683   0.090029750757913   0.086863837608875                   0                   0

  Columns 21 through 25

                   0                   0                   0                   0                   0

  Columns 26 through 30

                   0                   0                   0                   0                   0

  Columns 31 through 35

                   0                   0                   0                   0                   0

  Columns 36 through 40

                   0                   0                   0                   0                   0

  Columns 41 through 45

                   0                   0                   0                   0                   0

  Columns 46 through 50

                   0                   0                   0                   0                   0

  Columns 51 through 55

                   0                   0                   0                   0                   0

  Columns 56 through 60

                   0                   0                   0                   0                   0

  Column 61

                   0


outer_code_BER =

  Columns 1 through 5

   0.142920850967060   0.139557912044244   0.136195893375297   0.132836108354312   0.129479898919441

  Columns 6 through 10

   0.126128637696935   0.122783731089354   0.119446623430791   0.116118802320110   0.112801805221793

  Columns 11 through 15

   0.109497227389951   0.106206731120209   0.102932056262170   0.099675031826544   0.096437588390384

  Columns 16 through 20

   0.093221770836683   0.090029750757913   0.086863837608875                   0                   0

  Columns 21 through 25

                   0                   0                   0                   0                   0

  Columns 26 through 30

                   0                   0                   0                   0                   0

  Columns 31 through 35

                   0                   0                   0                   0                   0

  Columns 36 through 40

                   0                   0                   0                   0                   0

  Columns 41 through 45

                   0                   0                   0                   0                   0

  Columns 46 through 50

                   0                   0                   0                   0                   0

  Columns 51 through 55

                   0                   0                   0                   0                   0

  Columns 56 through 60

                   0                   0                   0                   0                   0

  Column 61

                   0


inner_code_BER =

  Columns 1 through 5

   0.142920850967061   0.139557912044243   0.136195893375298   0.132836108354312   0.129479898919440

  Columns 6 through 10

   0.126128637696935   0.122783731089354   0.119446623430791   0.116118802320110   0.112801805221793

  Columns 11 through 15

   0.109497227389950   0.106206731120209   0.102932056262169   0.099675031826543   0.096437588390384

  Columns 16 through 20

   0.093221770836683   0.090029750757913   0.086863837608875   0.083726487420960                   0

  Columns 21 through 25

                   0                   0                   0                   0                   0

  Columns 26 through 30

                   0                   0                   0                   0                   0

  Columns 31 through 35

                   0                   0                   0                   0                   0

  Columns 36 through 40

                   0                   0                   0                   0                   0

  Columns 41 through 45

                   0                   0                   0                   0                   0

  Columns 46 through 50

                   0                   0                   0                   0                   0

  Columns 51 through 55

                   0                   0                   0                   0                   0

  Columns 56 through 60

                   0                   0                   0                   0                   0

  Column 61

                   0


outer_code_BER =

  Columns 1 through 5

   0.142920850967060   0.139557912044244   0.136195893375297   0.132836108354312   0.129479898919441

  Columns 6 through 10

   0.126128637696935   0.122783731089354   0.119446623430791   0.116118802320110   0.112801805221793

  Columns 11 through 15

   0.109497227389951   0.106206731120209   0.102932056262170   0.099675031826544   0.096437588390384

  Columns 16 through 20

   0.093221770836683   0.090029750757913   0.086863837608875   0.083726487420960                   0

  Columns 21 through 25

                   0                   0                   0                   0                   0

  Columns 26 through 30

                   0                   0                   0                   0                   0

  Columns 31 through 35

                   0                   0                   0                   0                   0

  Columns 36 through 40

                   0                   0                   0                   0                   0

  Columns 41 through 45

                   0                   0                   0                   0                   0

  Columns 46 through 50

                   0                   0                   0                   0                   0

  Columns 51 through 55

                   0                   0                   0                   0                   0

  Columns 56 through 60

                   0                   0                   0                   0                   0

  Column 61

                   0


inner_code_BER =

  Columns 1 through 5

   0.142920850967061   0.139557912044243   0.136195893375298   0.132836108354312   0.129479898919440

  Columns 6 through 10

   0.126128637696935   0.122783731089354   0.119446623430791   0.116118802320110   0.112801805221793

  Columns 11 through 15

   0.109497227389950   0.106206731120209   0.102932056262169   0.099675031826543   0.096437588390384

  Columns 16 through 20

   0.093221770836683   0.090029750757913   0.086863837608875   0.083726487420960   0.080620307606942

  Columns 21 through 25

                   0                   0                   0                   0                   0

  Columns 26 through 30

                   0                   0                   0                   0                   0

  Columns 31 through 35

                   0                   0                   0                   0                   0

  Columns 36 through 40

                   0                   0                   0                   0                   0

  Columns 41 through 45

                   0                   0                   0                   0                   0

  Columns 46 through 50

                   0                   0                   0                   0                   0

  Columns 51 through 55

                   0                   0                   0                   0                   0

  Columns 56 through 60

                   0                   0                   0                   0                   0

  Column 61

                   0


outer_code_BER =

  Columns 1 through 5

   0.142920850967060   0.139557912044244   0.136195893375297   0.132836108354312   0.129479898919441

  Columns 6 through 10

   0.126128637696935   0.122783731089354   0.119446623430791   0.116118802320110   0.112801805221793

  Columns 11 through 15

   0.109497227389951   0.106206731120209   0.102932056262170   0.099675031826544   0.096437588390384

  Columns 16 through 20

   0.093221770836683   0.090029750757913   0.086863837608875   0.083726487420960   0.080620307606942

  Columns 21 through 25

                   0                   0                   0                   0                   0

  Columns 26 through 30

                   0                   0                   0                   0                   0

  Columns 31 through 35

                   0                   0                   0                   0                   0

  Columns 36 through 40

                   0                   0                   0                   0                   0

  Columns 41 through 45

                   0                   0                   0                   0                   0

  Columns 46 through 50

                   0                   0                   0                   0                   0

  Columns 51 through 55

                   0                   0                   0                   0                   0

  Columns 56 through 60

                   0                   0                   0                   0                   0

  Column 61

                   0


inner_code_BER =

  Columns 1 through 5

   0.142920850967061   0.139557912044243   0.136195893375298   0.132836108354312   0.129479898919440

  Columns 6 through 10

   0.126128637696935   0.122783731089354   0.119446623430791   0.116118802320110   0.112801805221793

  Columns 11 through 15

   0.109497227389950   0.106206731120209   0.102932056262169   0.099675031826543   0.096437588390384

  Columns 16 through 20

   0.093221770836683   0.090029750757913   0.086863837608875   0.083726487420960   0.080620307606942

  Columns 21 through 25

   0.077548056126027                   0                   0                   0                   0

  Columns 26 through 30

                   0                   0                   0                   0                   0

  Columns 31 through 35

                   0                   0                   0                   0                   0

  Columns 36 through 40

                   0                   0                   0                   0                   0

  Columns 41 through 45

                   0                   0                   0                   0                   0

  Columns 46 through 50

                   0                   0                   0                   0                   0

  Columns 51 through 55

                   0                   0                   0                   0                   0

  Columns 56 through 60

                   0                   0                   0                   0                   0

  Column 61

                   0


outer_code_BER =

  Columns 1 through 5

   0.142920850967060   0.139557912044244   0.136195893375297   0.132836108354312   0.129479898919441

  Columns 6 through 10

   0.126128637696935   0.122783731089354   0.119446623430791   0.116118802320110   0.112801805221793

  Columns 11 through 15

   0.109497227389951   0.106206731120209   0.102932056262170   0.099675031826544   0.096437588390384

  Columns 16 through 20

   0.093221770836683   0.090029750757913   0.086863837608875   0.083726487420960   0.080620307606942

  Columns 21 through 25

   0.077548056126028                   0                   0                   0                   0

  Columns 26 through 30

                   0                   0                   0                   0                   0

  Columns 31 through 35

                   0                   0                   0                   0                   0

  Columns 36 through 40

                   0                   0                   0                   0                   0

  Columns 41 through 45

                   0                   0                   0                   0                   0

  Columns 46 through 50

                   0                   0                   0                   0                   0

  Columns 51 through 55

                   0                   0                   0                   0                   0

  Columns 56 through 60

                   0                   0                   0                   0                   0

  Column 61

                   0


inner_code_BER =

  Columns 1 through 5

   0.142920850967061   0.139557912044243   0.136195893375298   0.132836108354312   0.129479898919440

  Columns 6 through 10

   0.126128637696935   0.122783731089354   0.119446623430791   0.116118802320110   0.112801805221793

  Columns 11 through 15

   0.109497227389950   0.106206731120209   0.102932056262169   0.099675031826543   0.096437588390384

  Columns 16 through 20

   0.093221770836683   0.090029750757913   0.086863837608875   0.083726487420960   0.080620307606942

  Columns 21 through 25

   0.077548056126027   0.074512633092785                   0                   0                   0

  Columns 26 through 30

                   0                   0                   0                   0                   0

  Columns 31 through 35

                   0                   0                   0                   0                   0

  Columns 36 through 40

                   0                   0                   0                   0                   0

  Columns 41 through 45

                   0                   0                   0                   0                   0

  Columns 46 through 50

                   0                   0                   0                   0                   0

  Columns 51 through 55

                   0                   0                   0                   0                   0

  Columns 56 through 60

                   0                   0                   0                   0                   0

  Column 61

                   0


outer_code_BER =

  Columns 1 through 5

   0.142920850967060   0.139557912044244   0.136195893375297   0.132836108354312   0.129479898919441

  Columns 6 through 10

   0.126128637696935   0.122783731089354   0.119446623430791   0.116118802320110   0.112801805221793

  Columns 11 through 15

   0.109497227389951   0.106206731120209   0.102932056262170   0.099675031826544   0.096437588390384

  Columns 16 through 20

   0.093221770836683   0.090029750757913   0.086863837608875   0.083726487420960   0.080620307606942

  Columns 21 through 25

   0.077548056126028   0.074512633092790                   0                   0                   0

  Columns 26 through 30

                   0                   0                   0                   0                   0

  Columns 31 through 35

                   0                   0                   0                   0                   0

  Columns 36 through 40

                   0                   0                   0                   0                   0

  Columns 41 through 45

                   0                   0                   0                   0                   0

  Columns 46 through 50

                   0                   0                   0                   0                   0

  Columns 51 through 55

                   0                   0                   0                   0                   0

  Columns 56 through 60

                   0                   0                   0                   0                   0

  Column 61

                   0


inner_code_BER =

  Columns 1 through 5

   0.142920850967061   0.139557912044243   0.136195893375298   0.132836108354312   0.129479898919440

  Columns 6 through 10

   0.126128637696935   0.122783731089354   0.119446623430791   0.116118802320110   0.112801805221793

  Columns 11 through 15

   0.109497227389950   0.106206731120209   0.102932056262169   0.099675031826543   0.096437588390384

  Columns 16 through 20

   0.093221770836683   0.090029750757913   0.086863837608875   0.083726487420960   0.080620307606942

  Columns 21 through 25

   0.077548056126027   0.074512633092785   0.071517062866465                   0                   0

  Columns 26 through 30

                   0                   0                   0                   0                   0

  Columns 31 through 35

                   0                   0                   0                   0                   0

  Columns 36 through 40

                   0                   0                   0                   0                   0

  Columns 41 through 45

                   0                   0                   0                   0                   0

  Columns 46 through 50

                   0                   0                   0                   0                   0

  Columns 51 through 55

                   0                   0                   0                   0                   0

  Columns 56 through 60

                   0                   0                   0                   0                   0

  Column 61

                   0


outer_code_BER =

  Columns 1 through 5

   0.142920850967060   0.139557912044244   0.136195893375297   0.132836108354312   0.129479898919441

  Columns 6 through 10

   0.126128637696935   0.122783731089354   0.119446623430791   0.116118802320110   0.112801805221793

  Columns 11 through 15

   0.109497227389951   0.106206731120209   0.102932056262170   0.099675031826544   0.096437588390384

  Columns 16 through 20

   0.093221770836683   0.090029750757913   0.086863837608875   0.083726487420960   0.080620307606942

  Columns 21 through 25

   0.077548056126028   0.074512633092790   0.071517062866481                   0                   0

  Columns 26 through 30

                   0                   0                   0                   0                   0

  Columns 31 through 35

                   0                   0                   0                   0                   0

  Columns 36 through 40

                   0                   0                   0                   0                   0

  Columns 41 through 45

                   0                   0                   0                   0                   0

  Columns 46 through 50

                   0                   0                   0                   0                   0

  Columns 51 through 55

                   0                   0                   0                   0                   0

  Columns 56 through 60

                   0                   0                   0                   0                   0

  Column 61

                   0


inner_code_BER =

  Columns 1 through 5

   0.142920850967061   0.139557912044243   0.136195893375298   0.132836108354312   0.129479898919440

  Columns 6 through 10

   0.126128637696935   0.122783731089354   0.119446623430791   0.116118802320110   0.112801805221793

  Columns 11 through 15

   0.109497227389950   0.106206731120209   0.102932056262169   0.099675031826543   0.096437588390384

  Columns 16 through 20

   0.093221770836683   0.090029750757913   0.086863837608875   0.083726487420960   0.080620307606942

  Columns 21 through 25

   0.077548056126027   0.074512633092785   0.071517062866465   0.068564464825356                   0

  Columns 26 through 30

                   0                   0                   0                   0                   0

  Columns 31 through 35

                   0                   0                   0                   0                   0

  Columns 36 through 40

                   0                   0                   0                   0                   0

  Columns 41 through 45

                   0                   0                   0                   0                   0

  Columns 46 through 50

                   0                   0                   0                   0                   0

  Columns 51 through 55

                   0                   0                   0                   0                   0

  Columns 56 through 60

                   0                   0                   0                   0                   0

  Column 61

                   0


outer_code_BER =

  Columns 1 through 5

   0.142920850967060   0.139557912044244   0.136195893375297   0.132836108354312   0.129479898919441

  Columns 6 through 10

   0.126128637696935   0.122783731089354   0.119446623430791   0.116118802320110   0.112801805221793

  Columns 11 through 15

   0.109497227389951   0.106206731120209   0.102932056262170   0.099675031826544   0.096437588390384

  Columns 16 through 20

   0.093221770836683   0.090029750757913   0.086863837608875   0.083726487420960   0.080620307606942

  Columns 21 through 25

   0.077548056126028   0.074512633092790   0.071517062866481   0.068564464825406                   0

  Columns 26 through 30

                   0                   0                   0                   0                   0

  Columns 31 through 35

                   0                   0                   0                   0                   0

  Columns 36 through 40

                   0                   0                   0                   0                   0

  Columns 41 through 45

                   0                   0                   0                   0                   0

  Columns 46 through 50

                   0                   0                   0                   0                   0

  Columns 51 through 55

                   0                   0                   0                   0                   0

  Columns 56 through 60

                   0                   0                   0                   0                   0

  Column 61

                   0


inner_code_BER =

  Columns 1 through 5

   0.142920850967061   0.139557912044243   0.136195893375298   0.132836108354312   0.129479898919440

  Columns 6 through 10

   0.126128637696935   0.122783731089354   0.119446623430791   0.116118802320110   0.112801805221793

  Columns 11 through 15

   0.109497227389950   0.106206731120209   0.102932056262169   0.099675031826543   0.096437588390384

  Columns 16 through 20

   0.093221770836683   0.090029750757913   0.086863837608875   0.083726487420960   0.080620307606942

  Columns 21 through 25

   0.077548056126027   0.074512633092785   0.071517062866465   0.068564464825356   0.065658011488746

  Columns 26 through 30

                   0                   0                   0                   0                   0

  Columns 31 through 35

                   0                   0                   0                   0                   0

  Columns 36 through 40

                   0                   0                   0                   0                   0

  Columns 41 through 45

                   0                   0                   0                   0                   0

  Columns 46 through 50

                   0                   0                   0                   0                   0

  Columns 51 through 55

                   0                   0                   0                   0                   0

  Columns 56 through 60

                   0                   0                   0                   0                   0

  Column 61

                   0


outer_code_BER =

  Columns 1 through 5

   0.142920850967060   0.139557912044244   0.136195893375297   0.132836108354312   0.129479898919441

  Columns 6 through 10

   0.126128637696935   0.122783731089354   0.119446623430791   0.116118802320110   0.112801805221793

  Columns 11 through 15

   0.109497227389951   0.106206731120209   0.102932056262170   0.099675031826544   0.096437588390384

  Columns 16 through 20

   0.093221770836683   0.090029750757913   0.086863837608875   0.083726487420960   0.080620307606942

  Columns 21 through 25

   0.077548056126028   0.074512633092790   0.071517062866481   0.068564464825406   0.065658011488897

  Columns 26 through 30

                   0                   0                   0                   0                   0

  Columns 31 through 35

                   0                   0                   0                   0                   0

  Columns 36 through 40

                   0                   0                   0                   0                   0

  Columns 41 through 45

                   0                   0                   0                   0                   0

  Columns 46 through 50

                   0                   0                   0                   0                   0

  Columns 51 through 55

                   0                   0                   0                   0                   0

  Columns 56 through 60

                   0                   0                   0                   0                   0

  Column 61

                   0


inner_code_BER =

  Columns 1 through 5

   0.142920850967061   0.139557912044243   0.136195893375298   0.132836108354312   0.129479898919440

  Columns 6 through 10

   0.126128637696935   0.122783731089354   0.119446623430791   0.116118802320110   0.112801805221793

  Columns 11 through 15

   0.109497227389950   0.106206731120209   0.102932056262169   0.099675031826543   0.096437588390384

  Columns 16 through 20

   0.093221770836683   0.090029750757913   0.086863837608875   0.083726487420960   0.080620307606942

  Columns 21 through 25

   0.077548056126027   0.074512633092785   0.071517062866465   0.068564464825356   0.065658011488746

  Columns 26 through 30

   0.062800873448920                   0                   0                   0                   0

  Columns 31 through 35

                   0                   0                   0                   0                   0

  Columns 36 through 40

                   0                   0                   0                   0                   0

  Columns 41 through 45

                   0                   0                   0                   0                   0

  Columns 46 through 50

                   0                   0                   0                   0                   0

  Columns 51 through 55

                   0                   0                   0                   0                   0

  Columns 56 through 60

                   0                   0                   0                   0                   0

  Column 61

                   0


outer_code_BER =

  Columns 1 through 5

   0.142920850967060   0.139557912044244   0.136195893375297   0.132836108354312   0.129479898919441

  Columns 6 through 10

   0.126128637696935   0.122783731089354   0.119446623430791   0.116118802320110   0.112801805221793

  Columns 11 through 15

   0.109497227389951   0.106206731120209   0.102932056262170   0.099675031826544   0.096437588390384

  Columns 16 through 20

   0.093221770836683   0.090029750757913   0.086863837608875   0.083726487420960   0.080620307606942

  Columns 21 through 25

   0.077548056126028   0.074512633092790   0.071517062866481   0.068564464825406   0.065658011488897

  Columns 26 through 30

   0.062800873449367                   0                   0                   0                   0

  Columns 31 through 35

                   0                   0                   0                   0                   0

  Columns 36 through 40

                   0                   0                   0                   0                   0

  Columns 41 through 45

                   0                   0                   0                   0                   0

  Columns 46 through 50

                   0                   0                   0                   0                   0

  Columns 51 through 55

                   0                   0                   0                   0                   0

  Columns 56 through 60

                   0                   0                   0                   0                   0

  Column 61

                   0


inner_code_BER =

  Columns 1 through 5

   0.142920850967061   0.139557912044243   0.136195893375298   0.132836108354312   0.129479898919440

  Columns 6 through 10

   0.126128637696935   0.122783731089354   0.119446623430791   0.116118802320110   0.112801805221793

  Columns 11 through 15

   0.109497227389950   0.106206731120209   0.102932056262169   0.099675031826543   0.096437588390384

  Columns 16 through 20

   0.093221770836683   0.090029750757913   0.086863837608875   0.083726487420960   0.080620307606942

  Columns 21 through 25

   0.077548056126027   0.074512633092785   0.071517062866465   0.068564464825356   0.065658011488746

  Columns 26 through 30

   0.062800873448920   0.059996151722083                   0                   0                   0

  Columns 31 through 35

                   0                   0                   0                   0                   0

  Columns 36 through 40

                   0                   0                   0                   0                   0

  Columns 41 through 45

                   0                   0                   0                   0                   0

  Columns 46 through 50

                   0                   0                   0                   0                   0

  Columns 51 through 55

                   0                   0                   0                   0                   0

  Columns 56 through 60

                   0                   0                   0                   0                   0

  Column 61

                   0


outer_code_BER =

  Columns 1 through 5

   0.142920850967060   0.139557912044244   0.136195893375297   0.132836108354312   0.129479898919441

  Columns 6 through 10

   0.126128637696935   0.122783731089354   0.119446623430791   0.116118802320110   0.112801805221793

  Columns 11 through 15

   0.109497227389951   0.106206731120209   0.102932056262170   0.099675031826544   0.096437588390384

  Columns 16 through 20

   0.093221770836683   0.090029750757913   0.086863837608875   0.083726487420960   0.080620307606942

  Columns 21 through 25

   0.077548056126028   0.074512633092790   0.071517062866481   0.068564464825406   0.065658011488897

  Columns 26 through 30

   0.062800873449367   0.059996151723357                   0                   0                   0

  Columns 31 through 35

                   0                   0                   0                   0                   0

  Columns 36 through 40

                   0                   0                   0                   0                   0

  Columns 41 through 45

                   0                   0                   0                   0                   0

  Columns 46 through 50

                   0                   0                   0                   0                   0

  Columns 51 through 55

                   0                   0                   0                   0                   0

  Columns 56 through 60

                   0                   0                   0                   0                   0

  Column 61

                   0


inner_code_BER =

  Columns 1 through 5

   0.142920850967061   0.139557912044243   0.136195893375298   0.132836108354312   0.129479898919440

  Columns 6 through 10

   0.126128637696935   0.122783731089354   0.119446623430791   0.116118802320110   0.112801805221793

  Columns 11 through 15

   0.109497227389950   0.106206731120209   0.102932056262169   0.099675031826543   0.096437588390384

  Columns 16 through 20

   0.093221770836683   0.090029750757913   0.086863837608875   0.083726487420960   0.080620307606942

  Columns 21 through 25

   0.077548056126027   0.074512633092785   0.071517062866465   0.068564464825356   0.065658011488746

  Columns 26 through 30

   0.062800873448920   0.059996151722083   0.057246799551733                   0                   0

  Columns 31 through 35

                   0                   0                   0                   0                   0

  Columns 36 through 40

                   0                   0                   0                   0                   0

  Columns 41 through 45

                   0                   0                   0                   0                   0

  Columns 46 through 50

                   0                   0                   0                   0                   0

  Columns 51 through 55

                   0                   0                   0                   0                   0

  Columns 56 through 60

                   0                   0                   0                   0                   0

  Column 61

                   0


outer_code_BER =

  Columns 1 through 5

   0.142920850967060   0.139557912044244   0.136195893375297   0.132836108354312   0.129479898919441

  Columns 6 through 10

   0.126128637696935   0.122783731089354   0.119446623430791   0.116118802320110   0.112801805221793

  Columns 11 through 15

   0.109497227389951   0.106206731120209   0.102932056262170   0.099675031826544   0.096437588390384

  Columns 16 through 20

   0.093221770836683   0.090029750757913   0.086863837608875   0.083726487420960   0.080620307606942

  Columns 21 through 25

   0.077548056126028   0.074512633092790   0.071517062866481   0.068564464825406   0.065658011488897

  Columns 26 through 30

   0.062800873449367   0.059996151723357   0.057246799555239                   0                   0

  Columns 31 through 35

                   0                   0                   0                   0                   0

  Columns 36 through 40

                   0                   0                   0                   0                   0

  Columns 41 through 45

                   0                   0                   0                   0                   0

  Columns 46 through 50

                   0                   0                   0                   0                   0

  Columns 51 through 55

                   0                   0                   0                   0                   0

  Columns 56 through 60

                   0                   0                   0                   0                   0

  Column 61

                   0


inner_code_BER =

  Columns 1 through 5

   0.142920850967061   0.139557912044243   0.136195893375298   0.132836108354312   0.129479898919440

  Columns 6 through 10

   0.126128637696935   0.122783731089354   0.119446623430791   0.116118802320110   0.112801805221793

  Columns 11 through 15

   0.109497227389950   0.106206731120209   0.102932056262169   0.099675031826543   0.096437588390384

  Columns 16 through 20

   0.093221770836683   0.090029750757913   0.086863837608875   0.083726487420960   0.080620307606942

  Columns 21 through 25

   0.077548056126027   0.074512633092785   0.071517062866465   0.068564464825356   0.065658011488746

  Columns 26 through 30

   0.062800873448920   0.059996151722083   0.057246799551733   0.054555537246231                   0

  Columns 31 through 35

                   0                   0                   0                   0                   0

  Columns 36 through 40

                   0                   0                   0                   0                   0

  Columns 41 through 45

                   0                   0                   0                   0                   0

  Columns 46 through 50

                   0                   0                   0                   0                   0

  Columns 51 through 55

                   0                   0                   0                   0                   0

  Columns 56 through 60

                   0                   0                   0                   0                   0

  Column 61

                   0


outer_code_BER =

  Columns 1 through 5

   0.142920850967060   0.139557912044244   0.136195893375297   0.132836108354312   0.129479898919441

  Columns 6 through 10

   0.126128637696935   0.122783731089354   0.119446623430791   0.116118802320110   0.112801805221793

  Columns 11 through 15

   0.109497227389951   0.106206731120209   0.102932056262170   0.099675031826544   0.096437588390384

  Columns 16 through 20

   0.093221770836683   0.090029750757913   0.086863837608875   0.083726487420960   0.080620307606942

  Columns 21 through 25

   0.077548056126028   0.074512633092790   0.071517062866481   0.068564464825406   0.065658011488897

  Columns 26 through 30

   0.062800873449367   0.059996151723357   0.057246799555239   0.054555537255540                   0

  Columns 31 through 35

                   0                   0                   0                   0                   0

  Columns 36 through 40

                   0                   0                   0                   0                   0

  Columns 41 through 45

                   0                   0                   0                   0                   0

  Columns 46 through 50

                   0                   0                   0                   0                   0

  Columns 51 through 55

                   0                   0                   0                   0                   0

  Columns 56 through 60

                   0                   0                   0                   0                   0

  Column 61

                   0


inner_code_BER =

  Columns 1 through 5

   0.142920850967061   0.139557912044243   0.136195893375298   0.132836108354312   0.129479898919440

  Columns 6 through 10

   0.126128637696935   0.122783731089354   0.119446623430791   0.116118802320110   0.112801805221793

  Columns 11 through 15

   0.109497227389950   0.106206731120209   0.102932056262169   0.099675031826543   0.096437588390384

  Columns 16 through 20

   0.093221770836683   0.090029750757913   0.086863837608875   0.083726487420960   0.080620307606942

  Columns 21 through 25

   0.077548056126027   0.074512633092785   0.071517062866465   0.068564464825356   0.065658011488746

  Columns 26 through 30

   0.062800873448920   0.059996151722083   0.057246799551733   0.054555537246231   0.051924765071478

  Columns 31 through 35

                   0                   0                   0                   0                   0

  Columns 36 through 40

                   0                   0                   0                   0                   0

  Columns 41 through 45

                   0                   0                   0                   0                   0

  Columns 46 through 50

                   0                   0                   0                   0                   0

  Columns 51 through 55

                   0                   0                   0                   0                   0

  Columns 56 through 60

                   0                   0                   0                   0                   0

  Column 61

                   0


outer_code_BER =

  Columns 1 through 5

   0.142920850967060   0.139557912044244   0.136195893375297   0.132836108354312   0.129479898919441

  Columns 6 through 10

   0.126128637696935   0.122783731089354   0.119446623430791   0.116118802320110   0.112801805221793

  Columns 11 through 15

   0.109497227389951   0.106206731120209   0.102932056262170   0.099675031826544   0.096437588390384

  Columns 16 through 20

   0.093221770836683   0.090029750757913   0.086863837608875   0.083726487420960   0.080620307606942

  Columns 21 through 25

   0.077548056126028   0.074512633092790   0.071517062866481   0.068564464825406   0.065658011488897

  Columns 26 through 30

   0.062800873449367   0.059996151723357   0.057246799555239   0.054555537255540   0.051924765095316

  Columns 31 through 35

                   0                   0                   0                   0                   0

  Columns 36 through 40

                   0                   0                   0                   0                   0

  Columns 41 through 45

                   0                   0                   0                   0                   0

  Columns 46 through 50

                   0                   0                   0                   0                   0

  Columns 51 through 55

                   0                   0                   0                   0                   0

  Columns 56 through 60

                   0                   0                   0                   0                   0

  Column 61

                   0


inner_code_BER =

  Columns 1 through 5

   0.142920850967061   0.139557912044243   0.136195893375298   0.132836108354312   0.129479898919440

  Columns 6 through 10

   0.126128637696935   0.122783731089354   0.119446623430791   0.116118802320110   0.112801805221793

  Columns 11 through 15

   0.109497227389950   0.106206731120209   0.102932056262169   0.099675031826543   0.096437588390384

  Columns 16 through 20

   0.093221770836683   0.090029750757913   0.086863837608875   0.083726487420960   0.080620307606942

  Columns 21 through 25

   0.077548056126027   0.074512633092785   0.071517062866465   0.068564464825356   0.065658011488746

  Columns 26 through 30

   0.062800873448920   0.059996151722083   0.057246799551733   0.054555537246231   0.051924765071478

  Columns 31 through 35

   0.049356480279576                   0                   0                   0                   0

  Columns 36 through 40

                   0                   0                   0                   0                   0

  Columns 41 through 45

                   0                   0                   0                   0                   0

  Columns 46 through 50

                   0                   0                   0                   0                   0

  Columns 51 through 55

                   0                   0                   0                   0                   0

  Columns 56 through 60

                   0                   0                   0                   0                   0

  Column 61

                   0


outer_code_BER =

  Columns 1 through 5

   0.142920850967060   0.139557912044244   0.136195893375297   0.132836108354312   0.129479898919441

  Columns 6 through 10

   0.126128637696935   0.122783731089354   0.119446623430791   0.116118802320110   0.112801805221793

  Columns 11 through 15

   0.109497227389951   0.106206731120209   0.102932056262170   0.099675031826544   0.096437588390384

  Columns 16 through 20

   0.093221770836683   0.090029750757913   0.086863837608875   0.083726487420960   0.080620307606942

  Columns 21 through 25

   0.077548056126028   0.074512633092790   0.071517062866481   0.068564464825406   0.065658011488897

  Columns 26 through 30

   0.062800873449367   0.059996151723357   0.057246799555239   0.054555537255540   0.051924765095316

  Columns 31 through 35

   0.049356480338446                   0                   0                   0                   0

  Columns 36 through 40

                   0                   0                   0                   0                   0

  Columns 41 through 45

                   0                   0                   0                   0                   0

  Columns 46 through 50

                   0                   0                   0                   0                   0

  Columns 51 through 55

                   0                   0                   0                   0                   0

  Columns 56 through 60

                   0                   0                   0                   0                   0

  Column 61

                   0


inner_code_BER =

  Columns 1 through 5

   0.142920850967061   0.139557912044243   0.136195893375298   0.132836108354312   0.129479898919440

  Columns 6 through 10

   0.126128637696935   0.122783731089354   0.119446623430791   0.116118802320110   0.112801805221793

  Columns 11 through 15

   0.109497227389950   0.106206731120209   0.102932056262169   0.099675031826543   0.096437588390384

  Columns 16 through 20

   0.093221770836683   0.090029750757913   0.086863837608875   0.083726487420960   0.080620307606942

  Columns 21 through 25

   0.077548056126027   0.074512633092785   0.071517062866465   0.068564464825356   0.065658011488746

  Columns 26 through 30

   0.062800873448920   0.059996151722083   0.057246799551733   0.054555537246231   0.051924765071478

  Columns 31 through 35

   0.049356480279576   0.046852204792793                   0                   0                   0

  Columns 36 through 40

                   0                   0                   0                   0                   0

  Columns 41 through 45

                   0                   0                   0                   0                   0

  Columns 46 through 50

                   0                   0                   0                   0                   0

  Columns 51 through 55

                   0                   0                   0                   0                   0

  Columns 56 through 60

                   0                   0                   0                   0                   0

  Column 61

                   0


outer_code_BER =

  Columns 1 through 5

   0.142920850967060   0.139557912044244   0.136195893375297   0.132836108354312   0.129479898919441

  Columns 6 through 10

   0.126128637696935   0.122783731089354   0.119446623430791   0.116118802320110   0.112801805221793

  Columns 11 through 15

   0.109497227389951   0.106206731120209   0.102932056262170   0.099675031826544   0.096437588390384

  Columns 16 through 20

   0.093221770836683   0.090029750757913   0.086863837608875   0.083726487420960   0.080620307606942

  Columns 21 through 25

   0.077548056126028   0.074512633092790   0.071517062866481   0.068564464825406   0.065658011488897

  Columns 26 through 30

   0.062800873449367   0.059996151723357   0.057246799555239   0.054555537255540   0.051924765095316

  Columns 31 through 35

   0.049356480338446   0.046852204933008                   0                   0                   0

  Columns 36 through 40

                   0                   0                   0                   0                   0

  Columns 41 through 45

                   0                   0                   0                   0                   0

  Columns 46 through 50

                   0                   0                   0                   0                   0

  Columns 51 through 55

                   0                   0                   0                   0                   0

  Columns 56 through 60

                   0                   0                   0                   0                   0

  Column 61

                   0


inner_code_BER =

  Columns 1 through 5

   0.142920850967061   0.139557912044243   0.136195893375298   0.132836108354312   0.129479898919440

  Columns 6 through 10

   0.126128637696935   0.122783731089354   0.119446623430791   0.116118802320110   0.112801805221793

  Columns 11 through 15

   0.109497227389950   0.106206731120209   0.102932056262169   0.099675031826543   0.096437588390384

  Columns 16 through 20

   0.093221770836683   0.090029750757913   0.086863837608875   0.083726487420960   0.080620307606942

  Columns 21 through 25

   0.077548056126027   0.074512633092785   0.071517062866465   0.068564464825356   0.065658011488746

  Columns 26 through 30

   0.062800873448920   0.059996151722083   0.057246799551733   0.054555537246231   0.051924765071478

  Columns 31 through 35

   0.049356480279576   0.046852204792793   0.044412929742457                   0                   0

  Columns 36 through 40

                   0                   0                   0                   0                   0

  Columns 41 through 45

                   0                   0                   0                   0                   0

  Columns 46 through 50

                   0                   0                   0                   0                   0

  Columns 51 through 55

                   0                   0                   0                   0                   0

  Columns 56 through 60

                   0                   0                   0                   0                   0

  Column 61

                   0


outer_code_BER =

  Columns 1 through 5

   0.142920850967060   0.139557912044244   0.136195893375297   0.132836108354312   0.129479898919441

  Columns 6 through 10

   0.126128637696935   0.122783731089354   0.119446623430791   0.116118802320110   0.112801805221793

  Columns 11 through 15

   0.109497227389951   0.106206731120209   0.102932056262170   0.099675031826544   0.096437588390384

  Columns 16 through 20

   0.093221770836683   0.090029750757913   0.086863837608875   0.083726487420960   0.080620307606942

  Columns 21 through 25

   0.077548056126028   0.074512633092790   0.071517062866481   0.068564464825406   0.065658011488897

  Columns 26 through 30

   0.062800873449367   0.059996151723357   0.057246799555239   0.054555537255540   0.051924765095316

  Columns 31 through 35

   0.049356480338446   0.046852204933008   0.044412930064614                   0                   0

  Columns 36 through 40

                   0                   0                   0                   0                   0

  Columns 41 through 45

                   0                   0                   0                   0                   0

  Columns 46 through 50

                   0                   0                   0                   0                   0

  Columns 51 through 55

                   0                   0                   0                   0                   0

  Columns 56 through 60

                   0                   0                   0                   0                   0

  Column 61

                   0


inner_code_BER =

  Columns 1 through 5

   0.142920850967061   0.139557912044243   0.136195893375298   0.132836108354312   0.129479898919440

  Columns 6 through 10

   0.126128637696935   0.122783731089354   0.119446623430791   0.116118802320110   0.112801805221793

  Columns 11 through 15

   0.109497227389950   0.106206731120209   0.102932056262169   0.099675031826543   0.096437588390384

  Columns 16 through 20

   0.093221770836683   0.090029750757913   0.086863837608875   0.083726487420960   0.080620307606942

  Columns 21 through 25

   0.077548056126027   0.074512633092785   0.071517062866465   0.068564464825356   0.065658011488746

  Columns 26 through 30

   0.062800873448920   0.059996151722083   0.057246799551733   0.054555537246231   0.051924765071478

  Columns 31 through 35

   0.049356480279576   0.046852204792793   0.044412929742457   0.042039082014398                   0

  Columns 36 through 40

                   0                   0                   0                   0                   0

  Columns 41 through 45

                   0                   0                   0                   0                   0

  Columns 46 through 50

                   0                   0                   0                   0                   0

  Columns 51 through 55

                   0                   0                   0                   0                   0

  Columns 56 through 60

                   0                   0                   0                   0                   0

  Column 61

                   0


outer_code_BER =

  Columns 1 through 5

   0.142920850967060   0.139557912044244   0.136195893375297   0.132836108354312   0.129479898919441

  Columns 6 through 10

   0.126128637696935   0.122783731089354   0.119446623430791   0.116118802320110   0.112801805221793

  Columns 11 through 15

   0.109497227389951   0.106206731120209   0.102932056262170   0.099675031826544   0.096437588390384

  Columns 16 through 20

   0.093221770836683   0.090029750757913   0.086863837608875   0.083726487420960   0.080620307606942

  Columns 21 through 25

   0.077548056126028   0.074512633092790   0.071517062866481   0.068564464825406   0.065658011488897

  Columns 26 through 30

   0.062800873449367   0.059996151723357   0.057246799555239   0.054555537255540   0.051924765095316

  Columns 31 through 35

   0.049356480338446   0.046852204933008   0.044412930064614   0.042039082728552                   0

  Columns 36 through 40

                   0                   0                   0                   0                   0

  Columns 41 through 45

                   0                   0                   0                   0                   0

  Columns 46 through 50

                   0                   0                   0                   0                   0

  Columns 51 through 55

                   0                   0                   0                   0                   0

  Columns 56 through 60

                   0                   0                   0                   0                   0

  Column 61

                   0


inner_code_BER =

  Columns 1 through 5

   0.142920850967061   0.139557912044243   0.136195893375298   0.132836108354312   0.129479898919440

  Columns 6 through 10

   0.126128637696935   0.122783731089354   0.119446623430791   0.116118802320110   0.112801805221793

  Columns 11 through 15

   0.109497227389950   0.106206731120209   0.102932056262169   0.099675031826543   0.096437588390384

  Columns 16 through 20

   0.093221770836683   0.090029750757913   0.086863837608875   0.083726487420960   0.080620307606942

  Columns 21 through 25

   0.077548056126027   0.074512633092785   0.071517062866465   0.068564464825356   0.065658011488746

  Columns 26 through 30

   0.062800873448920   0.059996151722083   0.057246799551733   0.054555537246231   0.051924765071478

  Columns 31 through 35

   0.049356480279576   0.046852204792793   0.044412929742457   0.042039082014398   0.039730516391649

  Columns 36 through 40

                   0                   0                   0                   0                   0

  Columns 41 through 45

                   0                   0                   0                   0                   0

  Columns 46 through 50

                   0                   0                   0                   0                   0

  Columns 51 through 55

                   0                   0                   0                   0                   0

  Columns 56 through 60

                   0                   0                   0                   0                   0

  Column 61

                   0


outer_code_BER =

  Columns 1 through 5

   0.142920850967060   0.139557912044244   0.136195893375297   0.132836108354312   0.129479898919441

  Columns 6 through 10

   0.126128637696935   0.122783731089354   0.119446623430791   0.116118802320110   0.112801805221793

  Columns 11 through 15

   0.109497227389951   0.106206731120209   0.102932056262170   0.099675031826544   0.096437588390384

  Columns 16 through 20

   0.093221770836683   0.090029750757913   0.086863837608875   0.083726487420960   0.080620307606942

  Columns 21 through 25

   0.077548056126028   0.074512633092790   0.071517062866481   0.068564464825406   0.065658011488897

  Columns 26 through 30

   0.062800873449367   0.059996151723357   0.057246799555239   0.054555537255540   0.051924765095316

  Columns 31 through 35

   0.049356480338446   0.046852204933008   0.044412930064614   0.042039082728552   0.039730517919398

  Columns 36 through 40

                   0                   0                   0                   0                   0

  Columns 41 through 45

                   0                   0                   0                   0                   0

  Columns 46 through 50

                   0                   0                   0                   0                   0

  Columns 51 through 55

                   0                   0                   0                   0                   0

  Columns 56 through 60

                   0                   0                   0                   0                   0

  Column 61

                   0


inner_code_BER =

  Columns 1 through 5

   0.142920850967061   0.139557912044243   0.136195893375298   0.132836108354312   0.129479898919440

  Columns 6 through 10

   0.126128637696935   0.122783731089354   0.119446623430791   0.116118802320110   0.112801805221793

  Columns 11 through 15

   0.109497227389950   0.106206731120209   0.102932056262169   0.099675031826543   0.096437588390384

  Columns 16 through 20

   0.093221770836683   0.090029750757913   0.086863837608875   0.083726487420960   0.080620307606942

  Columns 21 through 25

   0.077548056126027   0.074512633092785   0.071517062866465   0.068564464825356   0.065658011488746

  Columns 26 through 30

   0.062800873448920   0.059996151722083   0.057246799551733   0.054555537246231   0.051924765071478

  Columns 31 through 35

   0.049356480279576   0.046852204792793   0.044412929742457   0.042039082014398   0.039730516391649

  Columns 36 through 40

   0.037486535179885                   0                   0                   0                   0

  Columns 41 through 45

                   0                   0                   0                   0                   0

  Columns 46 through 50

                   0                   0                   0                   0                   0

  Columns 51 through 55

                   0                   0                   0                   0                   0

  Columns 56 through 60

                   0                   0                   0                   0                   0

  Column 61

                   0


outer_code_BER =

  Columns 1 through 5

   0.142920850967060   0.139557912044244   0.136195893375297   0.132836108354312   0.129479898919441

  Columns 6 through 10

   0.126128637696935   0.122783731089354   0.119446623430791   0.116118802320110   0.112801805221793

  Columns 11 through 15

   0.109497227389951   0.106206731120209   0.102932056262170   0.099675031826544   0.096437588390384

  Columns 16 through 20

   0.093221770836683   0.090029750757913   0.086863837608875   0.083726487420960   0.080620307606942

  Columns 21 through 25

   0.077548056126028   0.074512633092790   0.071517062866481   0.068564464825406   0.065658011488897

  Columns 26 through 30

   0.062800873449367   0.059996151723357   0.057246799555239   0.054555537255540   0.051924765095316

  Columns 31 through 35

   0.049356480338446   0.046852204933008   0.044412930064614   0.042039082728552   0.039730517919398

  Columns 36 through 40

   0.037486538334041                   0                   0                   0                   0

  Columns 41 through 45

                   0                   0                   0                   0                   0

  Columns 46 through 50

                   0                   0                   0                   0                   0

  Columns 51 through 55

                   0                   0                   0                   0                   0

  Columns 56 through 60

                   0                   0                   0                   0                   0

  Column 61

                   0


inner_code_BER =

  Columns 1 through 5

   0.142920850967061   0.139557912044243   0.136195893375298   0.132836108354312   0.129479898919440

  Columns 6 through 10

   0.126128637696935   0.122783731089354   0.119446623430791   0.116118802320110   0.112801805221793

  Columns 11 through 15

   0.109497227389950   0.106206731120209   0.102932056262169   0.099675031826543   0.096437588390384

  Columns 16 through 20

   0.093221770836683   0.090029750757913   0.086863837608875   0.083726487420960   0.080620307606942

  Columns 21 through 25

   0.077548056126027   0.074512633092785   0.071517062866465   0.068564464825356   0.065658011488746

  Columns 26 through 30

   0.062800873448920   0.059996151722083   0.057246799551733   0.054555537246231   0.051924765071478

  Columns 31 through 35

   0.049356480279576   0.046852204792793   0.044412929742457   0.042039082014398   0.039730516391649

  Columns 36 through 40

   0.037486535179885   0.035305935798001                   0                   0                   0

  Columns 41 through 45

                   0                   0                   0                   0                   0

  Columns 46 through 50

                   0                   0                   0                   0                   0

  Columns 51 through 55

                   0                   0                   0                   0                   0

  Columns 56 through 60

                   0                   0                   0                   0                   0

  Column 61

                   0


outer_code_BER =

  Columns 1 through 5

   0.142920850967060   0.139557912044244   0.136195893375297   0.132836108354312   0.129479898919441

  Columns 6 through 10

   0.126128637696935   0.122783731089354   0.119446623430791   0.116118802320110   0.112801805221793

  Columns 11 through 15

   0.109497227389951   0.106206731120209   0.102932056262170   0.099675031826544   0.096437588390384

  Columns 16 through 20

   0.093221770836683   0.090029750757913   0.086863837608875   0.083726487420960   0.080620307606942

  Columns 21 through 25

   0.077548056126028   0.074512633092790   0.071517062866481   0.068564464825406   0.065658011488897

  Columns 26 through 30

   0.062800873449367   0.059996151723357   0.057246799555239   0.054555537255540   0.051924765095316

  Columns 31 through 35

   0.049356480338446   0.046852204933008   0.044412930064614   0.042039082728552   0.039730517919398

  Columns 36 through 40

   0.037486538334041   0.035305942081704                   0                   0                   0

  Columns 41 through 45

                   0                   0                   0                   0                   0

  Columns 46 through 50

                   0                   0                   0                   0                   0

  Columns 51 through 55

                   0                   0                   0                   0                   0

  Columns 56 through 60

                   0                   0                   0                   0                   0

  Column 61

                   0


inner_code_BER =

  Columns 1 through 5

   0.142920850967061   0.139557912044243   0.136195893375298   0.132836108354312   0.129479898919440

  Columns 6 through 10

   0.126128637696935   0.122783731089354   0.119446623430791   0.116118802320110   0.112801805221793

  Columns 11 through 15

   0.109497227389950   0.106206731120209   0.102932056262169   0.099675031826543   0.096437588390384

  Columns 16 through 20

   0.093221770836683   0.090029750757913   0.086863837608875   0.083726487420960   0.080620307606942

  Columns 21 through 25

   0.077548056126027   0.074512633092785   0.071517062866465   0.068564464825356   0.065658011488746

  Columns 26 through 30

   0.062800873448920   0.059996151722083   0.057246799551733   0.054555537246231   0.051924765071478

  Columns 31 through 35

   0.049356480279576   0.046852204792793   0.044412929742457   0.042039082014398   0.039730516391649

  Columns 36 through 40

   0.037486535179885   0.035305935798001   0.033187086153474                   0                   0

  Columns 41 through 45

                   0                   0                   0                   0                   0

  Columns 46 through 50

                   0                   0                   0                   0                   0

  Columns 51 through 55

                   0                   0                   0                   0                   0

  Columns 56 through 60

                   0                   0                   0                   0                   0

  Column 61

                   0


outer_code_BER =

  Columns 1 through 5

   0.142920850967060   0.139557912044244   0.136195893375297   0.132836108354312   0.129479898919441

  Columns 6 through 10

   0.126128637696935   0.122783731089354   0.119446623430791   0.116118802320110   0.112801805221793

  Columns 11 through 15

   0.109497227389951   0.106206731120209   0.102932056262170   0.099675031826544   0.096437588390384

  Columns 16 through 20

   0.093221770836683   0.090029750757913   0.086863837608875   0.083726487420960   0.080620307606942

  Columns 21 through 25

   0.077548056126028   0.074512633092790   0.071517062866481   0.068564464825406   0.065658011488897

  Columns 26 through 30

   0.062800873449367   0.059996151723357   0.057246799555239   0.054555537255540   0.051924765095316

  Columns 31 through 35

   0.049356480338446   0.046852204933008   0.044412930064614   0.042039082728552   0.039730517919398

  Columns 36 through 40

   0.037486538334041   0.035305942081704   0.033187098225614                   0                   0

  Columns 41 through 45

                   0                   0                   0                   0                   0

  Columns 46 through 50

                   0                   0                   0                   0                   0

  Columns 51 through 55

                   0                   0                   0                   0                   0

  Columns 56 through 60

                   0                   0                   0                   0                   0

  Column 61

                   0


inner_code_BER =

  Columns 1 through 5

   0.142920850967061   0.139557912044243   0.136195893375298   0.132836108354312   0.129479898919440

  Columns 6 through 10

   0.126128637696935   0.122783731089354   0.119446623430791   0.116118802320110   0.112801805221793

  Columns 11 through 15

   0.109497227389950   0.106206731120209   0.102932056262169   0.099675031826543   0.096437588390384

  Columns 16 through 20

   0.093221770836683   0.090029750757913   0.086863837608875   0.083726487420960   0.080620307606942

  Columns 21 through 25

   0.077548056126027   0.074512633092785   0.071517062866465   0.068564464825356   0.065658011488746

  Columns 26 through 30

   0.062800873448920   0.059996151722083   0.057246799551733   0.054555537246231   0.051924765071478

  Columns 31 through 35

   0.049356480279576   0.046852204792793   0.044412929742457   0.042039082014398   0.039730516391649

  Columns 36 through 40

   0.037486535179885   0.035305935798001   0.033187086153474   0.031128028059911                   0

  Columns 41 through 45

                   0                   0                   0                   0                   0

  Columns 46 through 50

                   0                   0                   0                   0                   0

  Columns 51 through 55

                   0                   0                   0                   0                   0

  Columns 56 through 60

                   0                   0                   0                   0                   0

  Column 61

                   0


outer_code_BER =

  Columns 1 through 5

   0.142920850967060   0.139557912044244   0.136195893375297   0.132836108354312   0.129479898919441

  Columns 6 through 10

   0.126128637696935   0.122783731089354   0.119446623430791   0.116118802320110   0.112801805221793

  Columns 11 through 15

   0.109497227389951   0.106206731120209   0.102932056262170   0.099675031826544   0.096437588390384

  Columns 16 through 20

   0.093221770836683   0.090029750757913   0.086863837608875   0.083726487420960   0.080620307606942

  Columns 21 through 25

   0.077548056126028   0.074512633092790   0.071517062866481   0.068564464825406   0.065658011488897

  Columns 26 through 30

   0.062800873449367   0.059996151723357   0.057246799555239   0.054555537255540   0.051924765095316

  Columns 31 through 35

   0.049356480338446   0.046852204933008   0.044412930064614   0.042039082728552   0.039730517919398

  Columns 36 through 40

   0.037486538334041   0.035305942081704   0.033187098225614   0.031128050394660                   0

  Columns 41 through 45

                   0                   0                   0                   0                   0

  Columns 46 through 50

                   0                   0                   0                   0                   0

  Columns 51 through 55

                   0                   0                   0                   0                   0

  Columns 56 through 60

                   0                   0                   0                   0                   0

  Column 61

                   0


inner_code_BER =

  Columns 1 through 5

   0.142920850967061   0.139557912044243   0.136195893375298   0.132836108354312   0.129479898919440

  Columns 6 through 10

   0.126128637696935   0.122783731089354   0.119446623430791   0.116118802320110   0.112801805221793

  Columns 11 through 15

   0.109497227389950   0.106206731120209   0.102932056262169   0.099675031826543   0.096437588390384

  Columns 16 through 20

   0.093221770836683   0.090029750757913   0.086863837608875   0.083726487420960   0.080620307606942

  Columns 21 through 25

   0.077548056126027   0.074512633092785   0.071517062866465   0.068564464825356   0.065658011488746

  Columns 26 through 30

   0.062800873448920   0.059996151722083   0.057246799551733   0.054555537246231   0.051924765071478

  Columns 31 through 35

   0.049356480279576   0.046852204792793   0.044412929742457   0.042039082014398   0.039730516391649

  Columns 36 through 40

   0.037486535179885   0.035305935798001   0.033187086153474   0.031128028059911   0.029126610737600

  Columns 41 through 45

                   0                   0                   0                   0                   0

  Columns 46 through 50

                   0                   0                   0                   0                   0

  Columns 51 through 55

                   0                   0                   0                   0                   0

  Columns 56 through 60

                   0                   0                   0                   0                   0

  Column 61

                   0


outer_code_BER =

  Columns 1 through 5

   0.142920850967060   0.139557912044244   0.136195893375297   0.132836108354312   0.129479898919441

  Columns 6 through 10

   0.126128637696935   0.122783731089354   0.119446623430791   0.116118802320110   0.112801805221793

  Columns 11 through 15

   0.109497227389951   0.106206731120209   0.102932056262170   0.099675031826544   0.096437588390384

  Columns 16 through 20

   0.093221770836683   0.090029750757913   0.086863837608875   0.083726487420960   0.080620307606942

  Columns 21 through 25

   0.077548056126028   0.074512633092790   0.071517062866481   0.068564464825406   0.065658011488897

  Columns 26 through 30

   0.062800873449367   0.059996151723357   0.057246799555239   0.054555537255540   0.051924765095316

  Columns 31 through 35

   0.049356480338446   0.046852204933008   0.044412930064614   0.042039082728552   0.039730517919398

  Columns 36 through 40

   0.037486538334041   0.035305942081704   0.033187098225614   0.031128050394660   0.029126650420215

  Columns 41 through 45

                   0                   0                   0                   0                   0

  Columns 46 through 50

                   0                   0                   0                   0                   0

  Columns 51 through 55

                   0                   0                   0                   0                   0

  Columns 56 through 60

                   0                   0                   0                   0                   0

  Column 61

                   0


inner_code_BER =

  Columns 1 through 5

   0.142920850967061   0.139557912044243   0.136195893375298   0.132836108354312   0.129479898919440

  Columns 6 through 10

   0.126128637696935   0.122783731089354   0.119446623430791   0.116118802320110   0.112801805221793

  Columns 11 through 15

   0.109497227389950   0.106206731120209   0.102932056262169   0.099675031826543   0.096437588390384

  Columns 16 through 20

   0.093221770836683   0.090029750757913   0.086863837608875   0.083726487420960   0.080620307606942

  Columns 21 through 25

   0.077548056126027   0.074512633092785   0.071517062866465   0.068564464825356   0.065658011488746

  Columns 26 through 30

   0.062800873448920   0.059996151722083   0.057246799551733   0.054555537246231   0.051924765071478

  Columns 31 through 35

   0.049356480279576   0.046852204792793   0.044412929742457   0.042039082014398   0.039730516391649

  Columns 36 through 40

   0.037486535179885   0.035305935798001   0.033187086153474   0.031128028059911   0.029126610737600

  Columns 41 through 45

   0.027180659672925                   0                   0                   0                   0

  Columns 46 through 50

                   0                   0                   0                   0                   0

  Columns 51 through 55

                   0                   0                   0                   0                   0

  Columns 56 through 60

                   0                   0                   0                   0                   0

  Column 61

                   0


outer_code_BER =

  Columns 1 through 5

   0.142920850967060   0.139557912044244   0.136195893375297   0.132836108354312   0.129479898919441

  Columns 6 through 10

   0.126128637696935   0.122783731089354   0.119446623430791   0.116118802320110   0.112801805221793

  Columns 11 through 15

   0.109497227389951   0.106206731120209   0.102932056262170   0.099675031826544   0.096437588390384

  Columns 16 through 20

   0.093221770836683   0.090029750757913   0.086863837608875   0.083726487420960   0.080620307606942

  Columns 21 through 25

   0.077548056126028   0.074512633092790   0.071517062866481   0.068564464825406   0.065658011488897

  Columns 26 through 30

   0.062800873449367   0.059996151723357   0.057246799555239   0.054555537255540   0.051924765095316

  Columns 31 through 35

   0.049356480338446   0.046852204933008   0.044412930064614   0.042039082728552   0.039730517919398

  Columns 36 through 40

   0.037486538334041   0.035305942081704   0.033187098225614   0.031128050394660   0.029126650420215

  Columns 41 through 45

   0.027180727025690                   0                   0                   0                   0

  Columns 46 through 50

                   0                   0                   0                   0                   0

  Columns 51 through 55

                   0                   0                   0                   0                   0

  Columns 56 through 60

                   0                   0                   0                   0                   0

  Column 61

                   0


inner_code_BER =

  Columns 1 through 5

   0.142920850967061   0.139557912044243   0.136195893375298   0.132836108354312   0.129479898919440

  Columns 6 through 10

   0.126128637696935   0.122783731089354   0.119446623430791   0.116118802320110   0.112801805221793

  Columns 11 through 15

   0.109497227389950   0.106206731120209   0.102932056262169   0.099675031826543   0.096437588390384

  Columns 16 through 20

   0.093221770836683   0.090029750757913   0.086863837608875   0.083726487420960   0.080620307606942

  Columns 21 through 25

   0.077548056126027   0.074512633092785   0.071517062866465   0.068564464825356   0.065658011488746

  Columns 26 through 30

   0.062800873448920   0.059996151722083   0.057246799551733   0.054555537246231   0.051924765071478

  Columns 31 through 35

   0.049356480279576   0.046852204792793   0.044412929742457   0.042039082014398   0.039730516391649

  Columns 36 through 40

   0.037486535179885   0.035305935798001   0.033187086153474   0.031128028059911   0.029126610737600

  Columns 41 through 45

   0.027180659672925   0.025288190683138                   0                   0                   0

  Columns 46 through 50

                   0                   0                   0                   0                   0

  Columns 51 through 55

                   0                   0                   0                   0                   0

  Columns 56 through 60

                   0                   0                   0                   0                   0

  Column 61

                   0


outer_code_BER =

  Columns 1 through 5

   0.142920850967060   0.139557912044244   0.136195893375297   0.132836108354312   0.129479898919441

  Columns 6 through 10

   0.126128637696935   0.122783731089354   0.119446623430791   0.116118802320110   0.112801805221793

  Columns 11 through 15

   0.109497227389951   0.106206731120209   0.102932056262170   0.099675031826544   0.096437588390384

  Columns 16 through 20

   0.093221770836683   0.090029750757913   0.086863837608875   0.083726487420960   0.080620307606942

  Columns 21 through 25

   0.077548056126028   0.074512633092790   0.071517062866481   0.068564464825406   0.065658011488897

  Columns 26 through 30

   0.062800873449367   0.059996151723357   0.057246799555239   0.054555537255540   0.051924765095316

  Columns 31 through 35

   0.049356480338446   0.046852204933008   0.044412930064614   0.042039082728552   0.039730517919398

  Columns 36 through 40

   0.037486538334041   0.035305942081704   0.033187098225614   0.031128050394660   0.029126650420215

  Columns 41 through 45

   0.027180727025690   0.025288298795384                   0                   0                   0

  Columns 46 through 50

                   0                   0                   0                   0                   0

  Columns 51 through 55

                   0                   0                   0                   0                   0

  Columns 56 through 60

                   0                   0                   0                   0                   0

  Column 61

                   0


inner_code_BER =

  Columns 1 through 5

   0.142920850967061   0.139557912044243   0.136195893375298   0.132836108354312   0.129479898919440

  Columns 6 through 10

   0.126128637696935   0.122783731089354   0.119446623430791   0.116118802320110   0.112801805221793

  Columns 11 through 15

   0.109497227389950   0.106206731120209   0.102932056262169   0.099675031826543   0.096437588390384

  Columns 16 through 20

   0.093221770836683   0.090029750757913   0.086863837608875   0.083726487420960   0.080620307606942

  Columns 21 through 25

   0.077548056126027   0.074512633092785   0.071517062866465   0.068564464825356   0.065658011488746

  Columns 26 through 30

   0.062800873448920   0.059996151722083   0.057246799551733   0.054555537246231   0.051924765071478

  Columns 31 through 35

   0.049356480279576   0.046852204792793   0.044412929742457   0.042039082014398   0.039730516391649

  Columns 36 through 40

   0.037486535179885   0.035305935798001   0.033187086153474   0.031128028059911   0.029126610737600

  Columns 41 through 45

   0.027180659672925   0.025288190683138   0.023447684323768                   0                   0

  Columns 46 through 50

                   0                   0                   0                   0                   0

  Columns 51 through 55

                   0                   0                   0                   0                   0

  Columns 56 through 60

                   0                   0                   0                   0                   0

  Column 61

                   0


outer_code_BER =

  Columns 1 through 5

   0.142920850967060   0.139557912044244   0.136195893375297   0.132836108354312   0.129479898919441

  Columns 6 through 10

   0.126128637696935   0.122783731089354   0.119446623430791   0.116118802320110   0.112801805221793

  Columns 11 through 15

   0.109497227389951   0.106206731120209   0.102932056262170   0.099675031826544   0.096437588390384

  Columns 16 through 20

   0.093221770836683   0.090029750757913   0.086863837608875   0.083726487420960   0.080620307606942

  Columns 21 through 25

   0.077548056126028   0.074512633092790   0.071517062866481   0.068564464825406   0.065658011488897

  Columns 26 through 30

   0.062800873449367   0.059996151723357   0.057246799555239   0.054555537255540   0.051924765095316

  Columns 31 through 35

   0.049356480338446   0.046852204933008   0.044412930064614   0.042039082728552   0.039730517919398

  Columns 36 through 40

   0.037486538334041   0.035305942081704   0.033187098225614   0.031128050394660   0.029126650420215

  Columns 41 through 45

   0.027180727025690   0.025288298795384   0.023447845130249                   0                   0

  Columns 46 through 50

                   0                   0                   0                   0                   0

  Columns 51 through 55

                   0                   0                   0                   0                   0

  Columns 56 through 60

                   0                   0                   0                   0                   0

  Column 61

                   0


inner_code_BER =

  Columns 1 through 5

   0.142920850967061   0.139557912044243   0.136195893375298   0.132836108354312   0.129479898919440

  Columns 6 through 10

   0.126128637696935   0.122783731089354   0.119446623430791   0.116118802320110   0.112801805221793

  Columns 11 through 15

   0.109497227389950   0.106206731120209   0.102932056262169   0.099675031826543   0.096437588390384

  Columns 16 through 20

   0.093221770836683   0.090029750757913   0.086863837608875   0.083726487420960   0.080620307606942

  Columns 21 through 25

   0.077548056126027   0.074512633092785   0.071517062866465   0.068564464825356   0.065658011488746

  Columns 26 through 30

   0.062800873448920   0.059996151722083   0.057246799551733   0.054555537246231   0.051924765071478

  Columns 31 through 35

   0.049356480279576   0.046852204792793   0.044412929742457   0.042039082014398   0.039730516391649

  Columns 36 through 40

   0.037486535179885   0.035305935798001   0.033187086153474   0.031128028059911   0.029126610737600

  Columns 41 through 45

   0.027180659672925   0.025288190683138   0.023447684323768   0.021658439948774                   0

  Columns 46 through 50

                   0                   0                   0                   0                   0

  Columns 51 through 55

                   0                   0                   0                   0                   0

  Columns 56 through 60

                   0                   0                   0                   0                   0

  Column 61

                   0


outer_code_BER =

  Columns 1 through 5

   0.142920850967060   0.139557912044244   0.136195893375297   0.132836108354312   0.129479898919441

  Columns 6 through 10

   0.126128637696935   0.122783731089354   0.119446623430791   0.116118802320110   0.112801805221793

  Columns 11 through 15

   0.109497227389951   0.106206731120209   0.102932056262170   0.099675031826544   0.096437588390384

  Columns 16 through 20

   0.093221770836683   0.090029750757913   0.086863837608875   0.083726487420960   0.080620307606942

  Columns 21 through 25

   0.077548056126028   0.074512633092790   0.071517062866481   0.068564464825406   0.065658011488897

  Columns 26 through 30

   0.062800873449367   0.059996151723357   0.057246799555239   0.054555537255540   0.051924765095316

  Columns 31 through 35

   0.049356480338446   0.046852204933008   0.044412930064614   0.042039082728552   0.039730517919398

  Columns 36 through 40

   0.037486538334041   0.035305942081704   0.033187098225614   0.031128050394660   0.029126650420215

  Columns 41 through 45

   0.027180727025690   0.025288298795384   0.023447845130249   0.021658651396381                   0

  Columns 46 through 50

                   0                   0                   0                   0                   0

  Columns 51 through 55

                   0                   0                   0                   0                   0

  Columns 56 through 60

                   0                   0                   0                   0                   0

  Column 61

                   0


inner_code_BER =

  Columns 1 through 5

   0.142920850967061   0.139557912044243   0.136195893375298   0.132836108354312   0.129479898919440

  Columns 6 through 10

   0.126128637696935   0.122783731089354   0.119446623430791   0.116118802320110   0.112801805221793

  Columns 11 through 15

   0.109497227389950   0.106206731120209   0.102932056262169   0.099675031826543   0.096437588390384

  Columns 16 through 20

   0.093221770836683   0.090029750757913   0.086863837608875   0.083726487420960   0.080620307606942

  Columns 21 through 25

   0.077548056126027   0.074512633092785   0.071517062866465   0.068564464825356   0.065658011488746

  Columns 26 through 30

   0.062800873448920   0.059996151722083   0.057246799551733   0.054555537246231   0.051924765071478

  Columns 31 through 35

   0.049356480279576   0.046852204792793   0.044412929742457   0.042039082014398   0.039730516391649

  Columns 36 through 40

   0.037486535179885   0.035305935798001   0.033187086153474   0.031128028059911   0.029126610737600

  Columns 41 through 45

   0.027180659672925   0.025288190683138   0.023447684323768   0.021658439948774   0.019921027219405

  Columns 46 through 50

                   0                   0                   0                   0                   0

  Columns 51 through 55

                   0                   0                   0                   0                   0

  Columns 56 through 60

                   0                   0                   0                   0                   0

  Column 61

                   0


outer_code_BER =

  Columns 1 through 5

   0.142920850967060   0.139557912044244   0.136195893375297   0.132836108354312   0.129479898919441

  Columns 6 through 10

   0.126128637696935   0.122783731089354   0.119446623430791   0.116118802320110   0.112801805221793

  Columns 11 through 15

   0.109497227389951   0.106206731120209   0.102932056262170   0.099675031826544   0.096437588390384

  Columns 16 through 20

   0.093221770836683   0.090029750757913   0.086863837608875   0.083726487420960   0.080620307606942

  Columns 21 through 25

   0.077548056126028   0.074512633092790   0.071517062866481   0.068564464825406   0.065658011488897

  Columns 26 through 30

   0.062800873449367   0.059996151723357   0.057246799555239   0.054555537255540   0.051924765095316

  Columns 31 through 35

   0.049356480338446   0.046852204933008   0.044412930064614   0.042039082728552   0.039730517919398

  Columns 36 through 40

   0.037486538334041   0.035305942081704   0.033187098225614   0.031128050394660   0.029126650420215

  Columns 41 through 45

   0.027180727025690   0.025288298795384   0.023447845130249   0.021658651396381   0.019921239745493

  Columns 46 through 50

                   0                   0                   0                   0                   0

  Columns 51 through 55

                   0                   0                   0                   0                   0

  Columns 56 through 60

                   0                   0                   0                   0                   0

  Column 61

                   0


inner_code_BER =

  Columns 1 through 5

   0.142920850967061   0.139557912044243   0.136195893375298   0.132836108354312   0.129479898919440

  Columns 6 through 10

   0.126128637696935   0.122783731089354   0.119446623430791   0.116118802320110   0.112801805221793

  Columns 11 through 15

   0.109497227389950   0.106206731120209   0.102932056262169   0.099675031826543   0.096437588390384

  Columns 16 through 20

   0.093221770836683   0.090029750757913   0.086863837608875   0.083726487420960   0.080620307606942

  Columns 21 through 25

   0.077548056126027   0.074512633092785   0.071517062866465   0.068564464825356   0.065658011488746

  Columns 26 through 30

   0.062800873448920   0.059996151722083   0.057246799551733   0.054555537246231   0.051924765071478

  Columns 31 through 35

   0.049356480279576   0.046852204792793   0.044412929742457   0.042039082014398   0.039730516391649

  Columns 36 through 40

   0.037486535179885   0.035305935798001   0.033187086153474   0.031128028059911   0.029126610737600

  Columns 41 through 45

   0.027180659672925   0.025288190683138   0.023447684323768   0.021658439948774   0.019921027219405

  Columns 46 through 50

   0.018237835913057                   0                   0                   0                   0

  Columns 51 through 55

                   0                   0                   0                   0                   0

  Columns 56 through 60

                   0                   0                   0                   0                   0

  Column 61

                   0


outer_code_BER =

  Columns 1 through 5

   0.142920850967060   0.139557912044244   0.136195893375297   0.132836108354312   0.129479898919441

  Columns 6 through 10

   0.126128637696935   0.122783731089354   0.119446623430791   0.116118802320110   0.112801805221793

  Columns 11 through 15

   0.109497227389951   0.106206731120209   0.102932056262170   0.099675031826544   0.096437588390384

  Columns 16 through 20

   0.093221770836683   0.090029750757913   0.086863837608875   0.083726487420960   0.080620307606942

  Columns 21 through 25

   0.077548056126028   0.074512633092790   0.071517062866481   0.068564464825406   0.065658011488897

  Columns 26 through 30

   0.062800873449367   0.059996151723357   0.057246799555239   0.054555537255540   0.051924765095316

  Columns 31 through 35

   0.049356480338446   0.046852204933008   0.044412930064614   0.042039082728552   0.039730517919398

  Columns 36 through 40

   0.037486538334041   0.035305942081704   0.033187098225614   0.031128050394660   0.029126650420215

  Columns 41 through 45

   0.027180727025690   0.025288298795384   0.023447845130249   0.021658651396381   0.019921239745493

  Columns 46 through 50

   0.018237874710298                   0                   0                   0                   0

  Columns 51 through 55

                   0                   0                   0                   0                   0

  Columns 56 through 60

                   0                   0                   0                   0                   0

  Column 61

                   0


inner_code_BER =

  Columns 1 through 5

   0.142920850967061   0.139557912044243   0.136195893375298   0.132836108354312   0.129479898919440

  Columns 6 through 10

   0.126128637696935   0.122783731089354   0.119446623430791   0.116118802320110   0.112801805221793

  Columns 11 through 15

   0.109497227389950   0.106206731120209   0.102932056262169   0.099675031826543   0.096437588390384

  Columns 16 through 20

   0.093221770836683   0.090029750757913   0.086863837608875   0.083726487420960   0.080620307606942

  Columns 21 through 25

   0.077548056126027   0.074512633092785   0.071517062866465   0.068564464825356   0.065658011488746

  Columns 26 through 30

   0.062800873448920   0.059996151722083   0.057246799551733   0.054555537246231   0.051924765071478

  Columns 31 through 35

   0.049356480279576   0.046852204792793   0.044412929742457   0.042039082014398   0.039730516391649

  Columns 36 through 40

   0.037486535179885   0.035305935798001   0.033187086153474   0.031128028059911   0.029126610737600

  Columns 41 through 45

   0.027180659672925   0.025288190683138   0.023447684323768   0.021658439948774   0.019921027219405

  Columns 46 through 50

   0.018237835913057   0.016613675524132                   0                   0                   0

  Columns 51 through 55

                   0                   0                   0                   0                   0

  Columns 56 through 60

                   0                   0                   0                   0                   0

  Column 61

                   0


outer_code_BER =

  Columns 1 through 5

   0.142920850967060   0.139557912044244   0.136195893375297   0.132836108354312   0.129479898919441

  Columns 6 through 10

   0.126128637696935   0.122783731089354   0.119446623430791   0.116118802320110   0.112801805221793

  Columns 11 through 15

   0.109497227389951   0.106206731120209   0.102932056262170   0.099675031826544   0.096437588390384

  Columns 16 through 20

   0.093221770836683   0.090029750757913   0.086863837608875   0.083726487420960   0.080620307606942

  Columns 21 through 25

   0.077548056126028   0.074512633092790   0.071517062866481   0.068564464825406   0.065658011488897

  Columns 26 through 30

   0.062800873449367   0.059996151723357   0.057246799555239   0.054555537255540   0.051924765095316

  Columns 31 through 35

   0.049356480338446   0.046852204933008   0.044412930064614   0.042039082728552   0.039730517919398

  Columns 36 through 40

   0.037486538334041   0.035305942081704   0.033187098225614   0.031128050394660   0.029126650420215

  Columns 41 through 45

   0.027180727025690   0.025288298795384   0.023447845130249   0.021658651396381   0.019921239745493

  Columns 46 through 50

   0.018237874710298   0.016613076172050                   0                   0                   0

  Columns 51 through 55

                   0                   0                   0                   0                   0

  Columns 56 through 60

                   0                   0                   0                   0                   0

  Column 61

                   0


inner_code_BER =

  Columns 1 through 5

   0.142920850967061   0.139557912044243   0.136195893375298   0.132836108354312   0.129479898919440

  Columns 6 through 10

   0.126128637696935   0.122783731089354   0.119446623430791   0.116118802320110   0.112801805221793

  Columns 11 through 15

   0.109497227389950   0.106206731120209   0.102932056262169   0.099675031826543   0.096437588390384

  Columns 16 through 20

   0.093221770836683   0.090029750757913   0.086863837608875   0.083726487420960   0.080620307606942

  Columns 21 through 25

   0.077548056126027   0.074512633092785   0.071517062866465   0.068564464825356   0.065658011488746

  Columns 26 through 30

   0.062800873448920   0.059996151722083   0.057246799551733   0.054555537246231   0.051924765071478

  Columns 31 through 35

   0.049356480279576   0.046852204792793   0.044412929742457   0.042039082014398   0.039730516391649

  Columns 36 through 40

   0.037486535179885   0.035305935798001   0.033187086153474   0.031128028059911   0.029126610737600

  Columns 41 through 45

   0.027180659672925   0.025288190683138   0.023447684323768   0.021658439948774   0.019921027219405

  Columns 46 through 50

   0.018237835913057   0.016613675524132   0.015056274483522                   0                   0

  Columns 51 through 55

                   0                   0                   0                   0                   0

  Columns 56 through 60

                   0                   0                   0                   0                   0

  Column 61

                   0


outer_code_BER =

  Columns 1 through 5

   0.142920850967060   0.139557912044244   0.136195893375297   0.132836108354312   0.129479898919441

  Columns 6 through 10

   0.126128637696935   0.122783731089354   0.119446623430791   0.116118802320110   0.112801805221793

  Columns 11 through 15

   0.109497227389951   0.106206731120209   0.102932056262170   0.099675031826544   0.096437588390384

  Columns 16 through 20

   0.093221770836683   0.090029750757913   0.086863837608875   0.083726487420960   0.080620307606942

  Columns 21 through 25

   0.077548056126028   0.074512633092790   0.071517062866481   0.068564464825406   0.065658011488897

  Columns 26 through 30

   0.062800873449367   0.059996151723357   0.057246799555239   0.054555537255540   0.051924765095316

  Columns 31 through 35

   0.049356480338446   0.046852204933008   0.044412930064614   0.042039082728552   0.039730517919398

  Columns 36 through 40

   0.037486538334041   0.035305942081704   0.033187098225614   0.031128050394660   0.029126650420215

  Columns 41 through 45

   0.027180727025690   0.025288298795384   0.023447845130249   0.021658651396381   0.019921239745493

  Columns 46 through 50

   0.018237874710298   0.016613076172050   0.015053966599896                   0                   0

  Columns 51 through 55

                   0                   0                   0                   0                   0

  Columns 56 through 60

                   0                   0                   0                   0                   0

  Column 61

                   0


inner_code_BER =

  Columns 1 through 5

   0.142920850967061   0.139557912044243   0.136195893375298   0.132836108354312   0.129479898919440

  Columns 6 through 10

   0.126128637696935   0.122783731089354   0.119446623430791   0.116118802320110   0.112801805221793

  Columns 11 through 15

   0.109497227389950   0.106206731120209   0.102932056262169   0.099675031826543   0.096437588390384

  Columns 16 through 20

   0.093221770836683   0.090029750757913   0.086863837608875   0.083726487420960   0.080620307606942

  Columns 21 through 25

   0.077548056126027   0.074512633092785   0.071517062866465   0.068564464825356   0.065658011488746

  Columns 26 through 30

   0.062800873448920   0.059996151722083   0.057246799551733   0.054555537246231   0.051924765071478

  Columns 31 through 35

   0.049356480279576   0.046852204792793   0.044412929742457   0.042039082014398   0.039730516391649

  Columns 36 through 40

   0.037486535179885   0.035305935798001   0.033187086153474   0.031128028059911   0.029126610737600

  Columns 41 through 45

   0.027180659672925   0.025288190683138   0.023447684323768   0.021658439948774   0.019921027219405

  Columns 46 through 50

   0.018237835913057   0.016613675524132   0.015056274483522   0.013576377045337                   0

  Columns 51 through 55

                   0                   0                   0                   0                   0

  Columns 56 through 60

                   0                   0                   0                   0                   0

  Column 61

                   0


outer_code_BER =

  Columns 1 through 5

   0.142920850967060   0.139557912044244   0.136195893375297   0.132836108354312   0.129479898919441

  Columns 6 through 10

   0.126128637696935   0.122783731089354   0.119446623430791   0.116118802320110   0.112801805221793

  Columns 11 through 15

   0.109497227389951   0.106206731120209   0.102932056262170   0.099675031826544   0.096437588390384

  Columns 16 through 20

   0.093221770836683   0.090029750757913   0.086863837608875   0.083726487420960   0.080620307606942

  Columns 21 through 25

   0.077548056126028   0.074512633092790   0.071517062866481   0.068564464825406   0.065658011488897

  Columns 26 through 30

   0.062800873449367   0.059996151723357   0.057246799555239   0.054555537255540   0.051924765095316

  Columns 31 through 35

   0.049356480338446   0.046852204933008   0.044412930064614   0.042039082728552   0.039730517919398

  Columns 36 through 40

   0.037486538334041   0.035305942081704   0.033187098225614   0.031128050394660   0.029126650420215

  Columns 41 through 45

   0.027180727025690   0.025288298795384   0.023447845130249   0.021658651396381   0.019921239745493

  Columns 46 through 50

   0.018237874710298   0.016613076172050   0.015053966599896   0.013570140223174                   0

  Columns 51 through 55

                   0                   0                   0                   0                   0

  Columns 56 through 60

                   0                   0                   0                   0                   0

  Column 61

                   0


inner_code_BER =

  Columns 1 through 5

   0.142920850967061   0.139557912044243   0.136195893375298   0.132836108354312   0.129479898919440

  Columns 6 through 10

   0.126128637696935   0.122783731089354   0.119446623430791   0.116118802320110   0.112801805221793

  Columns 11 through 15

   0.109497227389950   0.106206731120209   0.102932056262169   0.099675031826543   0.096437588390384

  Columns 16 through 20

   0.093221770836683   0.090029750757913   0.086863837608875   0.083726487420960   0.080620307606942

  Columns 21 through 25

   0.077548056126027   0.074512633092785   0.071517062866465   0.068564464825356   0.065658011488746

  Columns 26 through 30

   0.062800873448920   0.059996151722083   0.057246799551733   0.054555537246231   0.051924765071478

  Columns 31 through 35

   0.049356480279576   0.046852204792793   0.044412929742457   0.042039082014398   0.039730516391649

  Columns 36 through 40

   0.037486535179885   0.035305935798001   0.033187086153474   0.031128028059911   0.029126610737600

  Columns 41 through 45

   0.027180659672925   0.025288190683138   0.023447684323768   0.021658439948774   0.019921027219405

  Columns 46 through 50

   0.018237835913057   0.016613675524132   0.015056274483522   0.013576377045337   0.012187015422579

  Columns 51 through 55

                   0                   0                   0                   0                   0

  Columns 56 through 60

                   0                   0                   0                   0                   0

  Column 61

                   0


outer_code_BER =

  Columns 1 through 5

   0.142920850967060   0.139557912044244   0.136195893375297   0.132836108354312   0.129479898919441

  Columns 6 through 10

   0.126128637696935   0.122783731089354   0.119446623430791   0.116118802320110   0.112801805221793

  Columns 11 through 15

   0.109497227389951   0.106206731120209   0.102932056262170   0.099675031826544   0.096437588390384

  Columns 16 through 20

   0.093221770836683   0.090029750757913   0.086863837608875   0.083726487420960   0.080620307606942

  Columns 21 through 25

   0.077548056126028   0.074512633092790   0.071517062866481   0.068564464825406   0.065658011488897

  Columns 26 through 30

   0.062800873449367   0.059996151723357   0.057246799555239   0.054555537255540   0.051924765095316

  Columns 31 through 35

   0.049356480338446   0.046852204933008   0.044412930064614   0.042039082728552   0.039730517919398

  Columns 36 through 40

   0.037486538334041   0.035305942081704   0.033187098225614   0.031128050394660   0.029126650420215

  Columns 41 through 45

   0.027180727025690   0.025288298795384   0.023447845130249   0.021658651396381   0.019921239745493

  Columns 46 through 50

   0.018237874710298   0.016613076172050   0.015053966599896   0.013570140223174   0.012172669392106

  Columns 51 through 55

                   0                   0                   0                   0                   0

  Columns 56 through 60

                   0                   0                   0                   0                   0

  Column 61

                   0


inner_code_BER =

  Columns 1 through 5

   0.142920850967061   0.139557912044243   0.136195893375298   0.132836108354312   0.129479898919440

  Columns 6 through 10

   0.126128637696935   0.122783731089354   0.119446623430791   0.116118802320110   0.112801805221793

  Columns 11 through 15

   0.109497227389950   0.106206731120209   0.102932056262169   0.099675031826543   0.096437588390384

  Columns 16 through 20

   0.093221770836683   0.090029750757913   0.086863837608875   0.083726487420960   0.080620307606942

  Columns 21 through 25

   0.077548056126027   0.074512633092785   0.071517062866465   0.068564464825356   0.065658011488746

  Columns 26 through 30

   0.062800873448920   0.059996151722083   0.057246799551733   0.054555537246231   0.051924765071478

  Columns 31 through 35

   0.049356480279576   0.046852204792793   0.044412929742457   0.042039082014398   0.039730516391649

  Columns 36 through 40

   0.037486535179885   0.035305935798001   0.033187086153474   0.031128028059911   0.029126610737600

  Columns 41 through 45

   0.027180659672925   0.025288190683138   0.023447684323768   0.021658439948774   0.019921027219405

  Columns 46 through 50

   0.018237835913057   0.016613675524132   0.015056274483522   0.013576377045337   0.012187015422579

  Columns 51 through 55

   0.010901648654715                   0                   0                   0                   0

  Columns 56 through 60

                   0                   0                   0                   0                   0

  Column 61

                   0


outer_code_BER =

  Columns 1 through 5

   0.142920850967060   0.139557912044244   0.136195893375297   0.132836108354312   0.129479898919441

  Columns 6 through 10

   0.126128637696935   0.122783731089354   0.119446623430791   0.116118802320110   0.112801805221793

  Columns 11 through 15

   0.109497227389951   0.106206731120209   0.102932056262170   0.099675031826544   0.096437588390384

  Columns 16 through 20

   0.093221770836683   0.090029750757913   0.086863837608875   0.083726487420960   0.080620307606942

  Columns 21 through 25

   0.077548056126028   0.074512633092790   0.071517062866481   0.068564464825406   0.065658011488897

  Columns 26 through 30

   0.062800873449367   0.059996151723357   0.057246799555239   0.054555537255540   0.051924765095316

  Columns 31 through 35

   0.049356480338446   0.046852204933008   0.044412930064614   0.042039082728552   0.039730517919398

  Columns 36 through 40

   0.037486538334041   0.035305942081704   0.033187098225614   0.031128050394660   0.029126650420215

  Columns 41 through 45

   0.027180727025690   0.025288298795384   0.023447845130249   0.021658651396381   0.019921239745493

  Columns 46 through 50

   0.018237874710298   0.016613076172050   0.015053966599896   0.013570140223174   0.012172669392106

  Columns 51 through 55

   0.010872056810709                   0                   0                   0                   0

  Columns 56 through 60

                   0                   0                   0                   0                   0

  Column 61

                   0


inner_code_BER =

  Columns 1 through 5

   0.142920850967061   0.139557912044243   0.136195893375298   0.132836108354312   0.129479898919440

  Columns 6 through 10

   0.126128637696935   0.122783731089354   0.119446623430791   0.116118802320110   0.112801805221793

  Columns 11 through 15

   0.109497227389950   0.106206731120209   0.102932056262169   0.099675031826543   0.096437588390384

  Columns 16 through 20

   0.093221770836683   0.090029750757913   0.086863837608875   0.083726487420960   0.080620307606942

  Columns 21 through 25

   0.077548056126027   0.074512633092785   0.071517062866465   0.068564464825356   0.065658011488746

  Columns 26 through 30

   0.062800873448920   0.059996151722083   0.057246799551733   0.054555537246231   0.051924765071478

  Columns 31 through 35

   0.049356480279576   0.046852204792793   0.044412929742457   0.042039082014398   0.039730516391649

  Columns 36 through 40

   0.037486535179885   0.035305935798001   0.033187086153474   0.031128028059911   0.029126610737600

  Columns 41 through 45

   0.027180659672925   0.025288190683138   0.023447684323768   0.021658439948774   0.019921027219405

  Columns 46 through 50

   0.018237835913057   0.016613675524132   0.015056274483522   0.013576377045337   0.012187015422579

  Columns 51 through 55

   0.010901648654715   0.009731397400540                   0                   0                   0

  Columns 56 through 60

                   0                   0                   0                   0                   0

  Column 61

                   0


outer_code_BER =

  Columns 1 through 5

   0.142920850967060   0.139557912044244   0.136195893375297   0.132836108354312   0.129479898919441

  Columns 6 through 10

   0.126128637696935   0.122783731089354   0.119446623430791   0.116118802320110   0.112801805221793

  Columns 11 through 15

   0.109497227389951   0.106206731120209   0.102932056262170   0.099675031826544   0.096437588390384

  Columns 16 through 20

   0.093221770836683   0.090029750757913   0.086863837608875   0.083726487420960   0.080620307606942

  Columns 21 through 25

   0.077548056126028   0.074512633092790   0.071517062866481   0.068564464825406   0.065658011488897

  Columns 26 through 30

   0.062800873449367   0.059996151723357   0.057246799555239   0.054555537255540   0.051924765095316

  Columns 31 through 35

   0.049356480338446   0.046852204933008   0.044412930064614   0.042039082728552   0.039730517919398

  Columns 36 through 40

   0.037486538334041   0.035305942081704   0.033187098225614   0.031128050394660   0.029126650420215

  Columns 41 through 45

   0.027180727025690   0.025288298795384   0.023447845130249   0.021658651396381   0.019921239745493

  Columns 46 through 50

   0.018237874710298   0.016613076172050   0.015053966599896   0.013570140223174   0.012172669392106

  Columns 51 through 55

   0.010872056810709   0.009675518338855                   0                   0                   0

  Columns 56 through 60

                   0                   0                   0                   0                   0

  Column 61

                   0


inner_code_BER =

  Columns 1 through 5

   0.142920850967061   0.139557912044243   0.136195893375298   0.132836108354312   0.129479898919440

  Columns 6 through 10

   0.126128637696935   0.122783731089354   0.119446623430791   0.116118802320110   0.112801805221793

  Columns 11 through 15

   0.109497227389950   0.106206731120209   0.102932056262169   0.099675031826543   0.096437588390384

  Columns 16 through 20

   0.093221770836683   0.090029750757913   0.086863837608875   0.083726487420960   0.080620307606942

  Columns 21 through 25

   0.077548056126027   0.074512633092785   0.071517062866465   0.068564464825356   0.065658011488746

  Columns 26 through 30

   0.062800873448920   0.059996151722083   0.057246799551733   0.054555537246231   0.051924765071478

  Columns 31 through 35

   0.049356480279576   0.046852204792793   0.044412929742457   0.042039082014398   0.039730516391649

  Columns 36 through 40

   0.037486535179885   0.035305935798001   0.033187086153474   0.031128028059911   0.029126610737600

  Columns 41 through 45

   0.027180659672925   0.025288190683138   0.023447684323768   0.021658439948774   0.019921027219405

  Columns 46 through 50

   0.018237835913057   0.016613675524132   0.015056274483522   0.013576377045337   0.012187015422579

  Columns 51 through 55

   0.010901648654715   0.009731397400540   0.008682358477628                   0                   0

  Columns 56 through 60

                   0                   0                   0                   0                   0

  Column 61

                   0


outer_code_BER =

  Columns 1 through 5

   0.142920850967060   0.139557912044244   0.136195893375297   0.132836108354312   0.129479898919441

  Columns 6 through 10

   0.126128637696935   0.122783731089354   0.119446623430791   0.116118802320110   0.112801805221793

  Columns 11 through 15

   0.109497227389951   0.106206731120209   0.102932056262170   0.099675031826544   0.096437588390384

  Columns 16 through 20

   0.093221770836683   0.090029750757913   0.086863837608875   0.083726487420960   0.080620307606942

  Columns 21 through 25

   0.077548056126028   0.074512633092790   0.071517062866481   0.068564464825406   0.065658011488897

  Columns 26 through 30

   0.062800873449367   0.059996151723357   0.057246799555239   0.054555537255540   0.051924765095316

  Columns 31 through 35

   0.049356480338446   0.046852204933008   0.044412930064614   0.042039082728552   0.039730517919398

  Columns 36 through 40

   0.037486538334041   0.035305942081704   0.033187098225614   0.031128050394660   0.029126650420215

  Columns 41 through 45

   0.027180727025690   0.025288298795384   0.023447845130249   0.021658651396381   0.019921239745493

  Columns 46 through 50

   0.018237874710298   0.016613076172050   0.015053966599896   0.013570140223174   0.012172669392106

  Columns 51 through 55

   0.010872056810709   0.009675518338855   0.008584621056892                   0                   0

  Columns 56 through 60

                   0                   0                   0                   0                   0

  Column 61

                   0


inner_code_BER =

  Columns 1 through 5

   0.142920850967061   0.139557912044243   0.136195893375298   0.132836108354312   0.129479898919440

  Columns 6 through 10

   0.126128637696935   0.122783731089354   0.119446623430791   0.116118802320110   0.112801805221793

  Columns 11 through 15

   0.109497227389950   0.106206731120209   0.102932056262169   0.099675031826543   0.096437588390384

  Columns 16 through 20

   0.093221770836683   0.090029750757913   0.086863837608875   0.083726487420960   0.080620307606942

  Columns 21 through 25

   0.077548056126027   0.074512633092785   0.071517062866465   0.068564464825356   0.065658011488746

  Columns 26 through 30

   0.062800873448920   0.059996151722083   0.057246799551733   0.054555537246231   0.051924765071478

  Columns 31 through 35

   0.049356480279576   0.046852204792793   0.044412929742457   0.042039082014398   0.039730516391649

  Columns 36 through 40

   0.037486535179885   0.035305935798001   0.033187086153474   0.031128028059911   0.029126610737600

  Columns 41 through 45

   0.027180659672925   0.025288190683138   0.023447684323768   0.021658439948774   0.019921027219405

  Columns 46 through 50

   0.018237835913057   0.016613675524132   0.015056274483522   0.013576377045337   0.012187015422579

  Columns 51 through 55

   0.010901648654715   0.009731397400540   0.008682358477628   0.007754236803271                   0

  Columns 56 through 60

                   0                   0                   0                   0                   0

  Column 61

                   0


outer_code_BER =

  Columns 1 through 5

   0.142920850967060   0.139557912044244   0.136195893375297   0.132836108354312   0.129479898919441

  Columns 6 through 10

   0.126128637696935   0.122783731089354   0.119446623430791   0.116118802320110   0.112801805221793

  Columns 11 through 15

   0.109497227389951   0.106206731120209   0.102932056262170   0.099675031826544   0.096437588390384

  Columns 16 through 20

   0.093221770836683   0.090029750757913   0.086863837608875   0.083726487420960   0.080620307606942

  Columns 21 through 25

   0.077548056126028   0.074512633092790   0.071517062866481   0.068564464825406   0.065658011488897

  Columns 26 through 30

   0.062800873449367   0.059996151723357   0.057246799555239   0.054555537255540   0.051924765095316

  Columns 31 through 35

   0.049356480338446   0.046852204933008   0.044412930064614   0.042039082728552   0.039730517919398

  Columns 36 through 40

   0.037486538334041   0.035305942081704   0.033187098225614   0.031128050394660   0.029126650420215

  Columns 41 through 45

   0.027180727025690   0.025288298795384   0.023447845130249   0.021658651396381   0.019921239745493

  Columns 46 through 50

   0.018237874710298   0.016613076172050   0.015053966599896   0.013570140223174   0.012172669392106

  Columns 51 through 55

   0.010872056810709   0.009675518338855   0.008584621056892   0.007594303446781                   0

  Columns 56 through 60

                   0                   0                   0                   0                   0

  Column 61

                   0


inner_code_BER =

  Columns 1 through 5

   0.142920850967061   0.139557912044243   0.136195893375298   0.132836108354312   0.129479898919440

  Columns 6 through 10

   0.126128637696935   0.122783731089354   0.119446623430791   0.116118802320110   0.112801805221793

  Columns 11 through 15

   0.109497227389950   0.106206731120209   0.102932056262169   0.099675031826543   0.096437588390384

  Columns 16 through 20

   0.093221770836683   0.090029750757913   0.086863837608875   0.083726487420960   0.080620307606942

  Columns 21 through 25

   0.077548056126027   0.074512633092785   0.071517062866465   0.068564464825356   0.065658011488746

  Columns 26 through 30

   0.062800873448920   0.059996151722083   0.057246799551733   0.054555537246231   0.051924765071478

  Columns 31 through 35

   0.049356480279576   0.046852204792793   0.044412929742457   0.042039082014398   0.039730516391649

  Columns 36 through 40

   0.037486535179885   0.035305935798001   0.033187086153474   0.031128028059911   0.029126610737600

  Columns 41 through 45

   0.027180659672925   0.025288190683138   0.023447684323768   0.021658439948774   0.019921027219405

  Columns 46 through 50

   0.018237835913057   0.016613675524132   0.015056274483522   0.013576377045337   0.012187015422579

  Columns 51 through 55

   0.010901648654715   0.009731397400540   0.008682358477628   0.007754236803271   0.006940834532532

  Columns 56 through 60

                   0                   0                   0                   0                   0

  Column 61

                   0


outer_code_BER =

  Columns 1 through 5

   0.142920850967060   0.139557912044244   0.136195893375297   0.132836108354312   0.129479898919441

  Columns 6 through 10

   0.126128637696935   0.122783731089354   0.119446623430791   0.116118802320110   0.112801805221793

  Columns 11 through 15

   0.109497227389951   0.106206731120209   0.102932056262170   0.099675031826544   0.096437588390384

  Columns 16 through 20

   0.093221770836683   0.090029750757913   0.086863837608875   0.083726487420960   0.080620307606942

  Columns 21 through 25

   0.077548056126028   0.074512633092790   0.071517062866481   0.068564464825406   0.065658011488897

  Columns 26 through 30

   0.062800873449367   0.059996151723357   0.057246799555239   0.054555537255540   0.051924765095316

  Columns 31 through 35

   0.049356480338446   0.046852204933008   0.044412930064614   0.042039082728552   0.039730517919398

  Columns 36 through 40

   0.037486538334041   0.035305942081704   0.033187098225614   0.031128050394660   0.029126650420215

  Columns 41 through 45

   0.027180727025690   0.025288298795384   0.023447845130249   0.021658651396381   0.019921239745493

  Columns 46 through 50

   0.018237874710298   0.016613076172050   0.015053966599896   0.013570140223174   0.012172669392106

  Columns 51 through 55

   0.010872056810709   0.009675518338855   0.008584621056892   0.007594303446781   0.006693422338828

  Columns 56 through 60

                   0                   0                   0                   0                   0

  Column 61

                   0


inner_code_BER =

  Columns 1 through 5

   0.142920850967061   0.139557912044243   0.136195893375298   0.132836108354312   0.129479898919440

  Columns 6 through 10

   0.126128637696935   0.122783731089354   0.119446623430791   0.116118802320110   0.112801805221793

  Columns 11 through 15

   0.109497227389950   0.106206731120209   0.102932056262169   0.099675031826543   0.096437588390384

  Columns 16 through 20

   0.093221770836683   0.090029750757913   0.086863837608875   0.083726487420960   0.080620307606942

  Columns 21 through 25

   0.077548056126027   0.074512633092785   0.071517062866465   0.068564464825356   0.065658011488746

  Columns 26 through 30

   0.062800873448920   0.059996151722083   0.057246799551733   0.054555537246231   0.051924765071478

  Columns 31 through 35

   0.049356480279576   0.046852204792793   0.044412929742457   0.042039082014398   0.039730516391649

  Columns 36 through 40

   0.037486535179885   0.035305935798001   0.033187086153474   0.031128028059911   0.029126610737600

  Columns 41 through 45

   0.027180659672925   0.025288190683138   0.023447684323768   0.021658439948774   0.019921027219405

  Columns 46 through 50

   0.018237835913057   0.016613675524132   0.015056274483522   0.013576377045337   0.012187015422579

  Columns 51 through 55

   0.010901648654715   0.009731397400540   0.008682358477628   0.007754236803271   0.006940834532532

  Columns 56 through 60

   0.006231872959120                   0                   0                   0                   0

  Column 61

                   0


outer_code_BER =

  Columns 1 through 5

   0.142920850967060   0.139557912044244   0.136195893375297   0.132836108354312   0.129479898919441

  Columns 6 through 10

   0.126128637696935   0.122783731089354   0.119446623430791   0.116118802320110   0.112801805221793

  Columns 11 through 15

   0.109497227389951   0.106206731120209   0.102932056262170   0.099675031826544   0.096437588390384

  Columns 16 through 20

   0.093221770836683   0.090029750757913   0.086863837608875   0.083726487420960   0.080620307606942

  Columns 21 through 25

   0.077548056126028   0.074512633092790   0.071517062866481   0.068564464825406   0.065658011488897

  Columns 26 through 30

   0.062800873449367   0.059996151723357   0.057246799555239   0.054555537255540   0.051924765095316

  Columns 31 through 35

   0.049356480338446   0.046852204933008   0.044412930064614   0.042039082728552   0.039730517919398

  Columns 36 through 40

   0.037486538334041   0.035305942081704   0.033187098225614   0.031128050394660   0.029126650420215

  Columns 41 through 45

   0.027180727025690   0.025288298795384   0.023447845130249   0.021658651396381   0.019921239745493

  Columns 46 through 50

   0.018237874710298   0.016613076172050   0.015053966599896   0.013570140223174   0.012172669392106

  Columns 51 through 55

   0.010872056810709   0.009675518338855   0.008584621056892   0.007594303446781   0.006693422338828

  Columns 56 through 60

   0.005865884540387                   0                   0                   0                   0

  Column 61

                   0


inner_code_BER =

  Columns 1 through 5

   0.142920850967061   0.139557912044243   0.136195893375298   0.132836108354312   0.129479898919440

  Columns 6 through 10

   0.126128637696935   0.122783731089354   0.119446623430791   0.116118802320110   0.112801805221793

  Columns 11 through 15

   0.109497227389950   0.106206731120209   0.102932056262169   0.099675031826543   0.096437588390384

  Columns 16 through 20

   0.093221770836683   0.090029750757913   0.086863837608875   0.083726487420960   0.080620307606942

  Columns 21 through 25

   0.077548056126027   0.074512633092785   0.071517062866465   0.068564464825356   0.065658011488746

  Columns 26 through 30

   0.062800873448920   0.059996151722083   0.057246799551733   0.054555537246231   0.051924765071478

  Columns 31 through 35

   0.049356480279576   0.046852204792793   0.044412929742457   0.042039082014398   0.039730516391649

  Columns 36 through 40

   0.037486535179885   0.035305935798001   0.033187086153474   0.031128028059911   0.029126610737600

  Columns 41 through 45

   0.027180659672925   0.025288190683138   0.023447684323768   0.021658439948774   0.019921027219405

  Columns 46 through 50

   0.018237835913057   0.016613675524132   0.015056274483522   0.013576377045337   0.012187015422579

  Columns 51 through 55

   0.010901648654715   0.009731397400540   0.008682358477628   0.007754236803271   0.006940834532532

  Columns 56 through 60

   0.006231872959120   0.005615138146233                   0                   0                   0

  Column 61

                   0


outer_code_BER =

  Columns 1 through 5

   0.142920850967060   0.139557912044244   0.136195893375297   0.132836108354312   0.129479898919441

  Columns 6 through 10

   0.126128637696935   0.122783731089354   0.119446623430791   0.116118802320110   0.112801805221793

  Columns 11 through 15

   0.109497227389951   0.106206731120209   0.102932056262170   0.099675031826544   0.096437588390384

  Columns 16 through 20

   0.093221770836683   0.090029750757913   0.086863837608875   0.083726487420960   0.080620307606942

  Columns 21 through 25

   0.077548056126028   0.074512633092790   0.071517062866481   0.068564464825406   0.065658011488897

  Columns 26 through 30

   0.062800873449367   0.059996151723357   0.057246799555239   0.054555537255540   0.051924765095316

  Columns 31 through 35

   0.049356480338446   0.046852204933008   0.044412930064614   0.042039082728552   0.039730517919398

  Columns 36 through 40

   0.037486538334041   0.035305942081704   0.033187098225614   0.031128050394660   0.029126650420215

  Columns 41 through 45

   0.027180727025690   0.025288298795384   0.023447845130249   0.021658651396381   0.019921239745493

  Columns 46 through 50

   0.018237874710298   0.016613076172050   0.015053966599896   0.013570140223174   0.012172669392106

  Columns 51 through 55

   0.010872056810709   0.009675518338855   0.008584621056892   0.007594303446781   0.006693422338828

  Columns 56 through 60

   0.005865884540387   0.005090723630553                   0                   0                   0

  Column 61

                   0


inner_code_BER =

  Columns 1 through 5

   0.142920850967061   0.139557912044243   0.136195893375298   0.132836108354312   0.129479898919440

  Columns 6 through 10

   0.126128637696935   0.122783731089354   0.119446623430791   0.116118802320110   0.112801805221793

  Columns 11 through 15

   0.109497227389950   0.106206731120209   0.102932056262169   0.099675031826543   0.096437588390384

  Columns 16 through 20

   0.093221770836683   0.090029750757913   0.086863837608875   0.083726487420960   0.080620307606942

  Columns 21 through 25

   0.077548056126027   0.074512633092785   0.071517062866465   0.068564464825356   0.065658011488746

  Columns 26 through 30

   0.062800873448920   0.059996151722083   0.057246799551733   0.054555537246231   0.051924765071478

  Columns 31 through 35

   0.049356480279576   0.046852204792793   0.044412929742457   0.042039082014398   0.039730516391649

  Columns 36 through 40

   0.037486535179885   0.035305935798001   0.033187086153474   0.031128028059911   0.029126610737600

  Columns 41 through 45

   0.027180659672925   0.025288190683138   0.023447684323768   0.021658439948774   0.019921027219405

  Columns 46 through 50

   0.018237835913057   0.016613675524132   0.015056274483522   0.013576377045337   0.012187015422579

  Columns 51 through 55

   0.010901648654715   0.009731397400540   0.008682358477628   0.007754236803271   0.006940834532532

  Columns 56 through 60

   0.006231872959120   0.005615138146233   0.005078204639082                   0                   0

  Column 61

                   0


outer_code_BER =

  Columns 1 through 5

   0.142920850967060   0.139557912044244   0.136195893375297   0.132836108354312   0.129479898919441

  Columns 6 through 10

   0.126128637696935   0.122783731089354   0.119446623430791   0.116118802320110   0.112801805221793

  Columns 11 through 15

   0.109497227389951   0.106206731120209   0.102932056262170   0.099675031826544   0.096437588390384

  Columns 16 through 20

   0.093221770836683   0.090029750757913   0.086863837608875   0.083726487420960   0.080620307606942

  Columns 21 through 25

   0.077548056126028   0.074512633092790   0.071517062866481   0.068564464825406   0.065658011488897

  Columns 26 through 30

   0.062800873449367   0.059996151723357   0.057246799555239   0.054555537255540   0.051924765095316

  Columns 31 through 35

   0.049356480338446   0.046852204933008   0.044412930064614   0.042039082728552   0.039730517919398

  Columns 36 through 40

   0.037486538334041   0.035305942081704   0.033187098225614   0.031128050394660   0.029126650420215

  Columns 41 through 45

   0.027180727025690   0.025288298795384   0.023447845130249   0.021658651396381   0.019921239745493

  Columns 46 through 50

   0.018237874710298   0.016613076172050   0.015053966599896   0.013570140223174   0.012172669392106

  Columns 51 through 55

   0.010872056810709   0.009675518338855   0.008584621056892   0.007594303446781   0.006693422338828

  Columns 56 through 60

   0.005865884540387   0.005090723630553   0.004338076923121                   0                   0

  Column 61

                   0


inner_code_BER =

  Columns 1 through 5

   0.142920850967061   0.139557912044243   0.136195893375298   0.132836108354312   0.129479898919440

  Columns 6 through 10

   0.126128637696935   0.122783731089354   0.119446623430791   0.116118802320110   0.112801805221793

  Columns 11 through 15

   0.109497227389950   0.106206731120209   0.102932056262169   0.099675031826543   0.096437588390384

  Columns 16 through 20

   0.093221770836683   0.090029750757913   0.086863837608875   0.083726487420960   0.080620307606942

  Columns 21 through 25

   0.077548056126027   0.074512633092785   0.071517062866465   0.068564464825356   0.065658011488746

  Columns 26 through 30

   0.062800873448920   0.059996151722083   0.057246799551733   0.054555537246231   0.051924765071478

  Columns 31 through 35

   0.049356480279576   0.046852204792793   0.044412929742457   0.042039082014398   0.039730516391649

  Columns 36 through 40

   0.037486535179885   0.035305935798001   0.033187086153474   0.031128028059911   0.029126610737600

  Columns 41 through 45

   0.027180659672925   0.025288190683138   0.023447684323768   0.021658439948774   0.019921027219405

  Columns 46 through 50

   0.018237835913057   0.016613675524132   0.015056274483522   0.013576377045337   0.012187015422579

  Columns 51 through 55

   0.010901648654715   0.009731397400540   0.008682358477628   0.007754236803271   0.006940834532532

  Columns 56 through 60

   0.006231872959120   0.005615138146233   0.005078204639082   0.004609496930095                   0

  Column 61

                   0


outer_code_BER =

  Columns 1 through 5

   0.142920850967060   0.139557912044244   0.136195893375297   0.132836108354312   0.129479898919441

  Columns 6 through 10

   0.126128637696935   0.122783731089354   0.119446623430791   0.116118802320110   0.112801805221793

  Columns 11 through 15

   0.109497227389951   0.106206731120209   0.102932056262170   0.099675031826544   0.096437588390384

  Columns 16 through 20

   0.093221770836683   0.090029750757913   0.086863837608875   0.083726487420960   0.080620307606942

  Columns 21 through 25

   0.077548056126028   0.074512633092790   0.071517062866481   0.068564464825406   0.065658011488897

  Columns 26 through 30

   0.062800873449367   0.059996151723357   0.057246799555239   0.054555537255540   0.051924765095316

  Columns 31 through 35

   0.049356480338446   0.046852204933008   0.044412930064614   0.042039082728552   0.039730517919398

  Columns 36 through 40

   0.037486538334041   0.035305942081704   0.033187098225614   0.031128050394660   0.029126650420215

  Columns 41 through 45

   0.027180727025690   0.025288298795384   0.023447845130249   0.021658651396381   0.019921239745493

  Columns 46 through 50

   0.018237874710298   0.016613076172050   0.015053966599896   0.013570140223174   0.012172669392106

  Columns 51 through 55

   0.010872056810709   0.009675518338855   0.008584621056892   0.007594303446781   0.006693422338828

  Columns 56 through 60

   0.005865884540387   0.005090723630553   0.004338076923121   0.003546969474342                   0

  Column 61

                   0


inner_code_BER =

  Columns 1 through 5

   0.142920850967061   0.139557912044243   0.136195893375298   0.132836108354312   0.129479898919440

  Columns 6 through 10

   0.126128637696935   0.122783731089354   0.119446623430791   0.116118802320110   0.112801805221793

  Columns 11 through 15

   0.109497227389950   0.106206731120209   0.102932056262169   0.099675031826543   0.096437588390384

  Columns 16 through 20

   0.093221770836683   0.090029750757913   0.086863837608875   0.083726487420960   0.080620307606942

  Columns 21 through 25

   0.077548056126027   0.074512633092785   0.071517062866465   0.068564464825356   0.065658011488746

  Columns 26 through 30

   0.062800873448920   0.059996151722083   0.057246799551733   0.054555537246231   0.051924765071478

  Columns 31 through 35

   0.049356480279576   0.046852204792793   0.044412929742457   0.042039082014398   0.039730516391649

  Columns 36 through 40

   0.037486535179885   0.035305935798001   0.033187086153474   0.031128028059911   0.029126610737600

  Columns 41 through 45

   0.027180659672925   0.025288190683138   0.023447684323768   0.021658439948774   0.019921027219405

  Columns 46 through 50

   0.018237835913057   0.016613675524132   0.015056274483522   0.013576377045337   0.012187015422579

  Columns 51 through 55

   0.010901648654715   0.009731397400540   0.008682358477628   0.007754236803271   0.006940834532532

  Columns 56 through 60

   0.006231872959120   0.005615138146233   0.005078204639082   0.004609496930095   0.004198782475975

  Column 61

                   0


outer_code_BER =

  Columns 1 through 5

   0.142920850967060   0.139557912044244   0.136195893375297   0.132836108354312   0.129479898919441

  Columns 6 through 10

   0.126128637696935   0.122783731089354   0.119446623430791   0.116118802320110   0.112801805221793

  Columns 11 through 15

   0.109497227389951   0.106206731120209   0.102932056262170   0.099675031826544   0.096437588390384

  Columns 16 through 20

   0.093221770836683   0.090029750757913   0.086863837608875   0.083726487420960   0.080620307606942

  Columns 21 through 25

   0.077548056126028   0.074512633092790   0.071517062866481   0.068564464825406   0.065658011488897

  Columns 26 through 30

   0.062800873449367   0.059996151723357   0.057246799555239   0.054555537255540   0.051924765095316

  Columns 31 through 35

   0.049356480338446   0.046852204933008   0.044412930064614   0.042039082728552   0.039730517919398

  Columns 36 through 40

   0.037486538334041   0.035305942081704   0.033187098225614   0.031128050394660   0.029126650420215

  Columns 41 through 45

   0.027180727025690   0.025288298795384   0.023447845130249   0.021658651396381   0.019921239745493

  Columns 46 through 50

   0.018237874710298   0.016613076172050   0.015053966599896   0.013570140223174   0.012172669392106

  Columns 51 through 55

   0.010872056810709   0.009675518338855   0.008584621056892   0.007594303446781   0.006693422338828

  Columns 56 through 60

   0.005865884540387   0.005090723630553   0.004338076923121   0.003546969474342   0.000000183780011

  Column 61

                   0

��ǰ�����������ѵ���Ŀ�������ʣ������Ϊ5.90 dB

inner_code_BER =

  Columns 1 through 5

   0.142920850967061   0.139557912044243   0.136195893375298   0.132836108354312   0.129479898919440

  Columns 6 through 10

   0.126128637696935   0.122783731089354   0.119446623430791   0.116118802320110   0.112801805221793

  Columns 11 through 15

   0.109497227389950   0.106206731120209   0.102932056262169   0.099675031826543   0.096437588390384

  Columns 16 through 20

   0.093221770836683   0.090029750757913   0.086863837608875   0.083726487420960   0.080620307606942

  Columns 21 through 25

   0.077548056126027   0.074512633092785   0.071517062866465   0.068564464825356   0.065658011488746

  Columns 26 through 30

   0.062800873448920   0.059996151722083   0.057246799551733   0.054555537246231   0.051924765071478

  Columns 31 through 35

   0.049356480279576   0.046852204792793   0.044412929742457   0.042039082014398   0.039730516391649

  Columns 36 through 40

   0.037486535179885   0.035305935798001   0.033187086153474   0.031128028059911   0.029126610737600

  Columns 41 through 45

   0.027180659672925   0.025288190683138   0.023447684323768   0.021658439948774   0.019921027219405

  Columns 46 through 50

   0.018237835913057   0.016613675524132   0.015056274483522   0.013576377045337   0.012187015422579

  Columns 51 through 55

   0.010901648654715   0.009731397400540   0.008682358477628   0.007754236803271   0.006940834532532

  Columns 56 through 60

   0.006231872959120   0.005615138146233   0.005078204639082   0.004609496930095   0.004198782475975

  Column 61

   0.003837292985990

Elapsed time is 44771.198920 seconds.
