# Supplementary material for: An Efficient Design of Systematic Rateless Codes
Source: Hindawi journal article supplement (doi:10.1155/2020/8068414), 2020-05-19
Supplement: f1 [file 8068414.f1.zip › supplementary files/Matlab_code_for_Figure1/BER_by_DDE/仿真结果/BER_by_DDE_rayl_rate_1_2_dist2_Ns.txt]

��ǰ�ŵ�Ϊ�����ŵ�

EbN0indB_vec =

  Columns 1 through 5

                   0   0.100000000000000   0.200000000000000   0.300000000000000   0.400000000000000

  Columns 6 through 10

   0.500000000000000   0.600000000000000   0.700000000000000   0.800000000000000   0.900000000000000

  Columns 11 through 15

   1.000000000000000   1.100000000000000   1.200000000000000   1.300000000000000   1.400000000000000

  Columns 16 through 20

   1.500000000000000   1.600000000000000   1.700000000000000   1.800000000000000   1.900000000000000

  Columns 21 through 25

   2.000000000000000   2.100000000000000   2.200000000000000   2.300000000000000   2.400000000000000

  Columns 26 through 30

   2.500000000000000   2.600000000000000   2.700000000000000   2.800000000000000   2.900000000000000

  Columns 31 through 35

   3.000000000000000   3.100000000000000   3.200000000000000   3.300000000000000   3.400000000000000

  Columns 36 through 40

   3.500000000000000   3.600000000000000   3.700000000000000   3.800000000000000   3.900000000000000

  Columns 41 through 45

   4.000000000000000   4.100000000000000   4.200000000000000   4.300000000000000   4.400000000000000

  Columns 46 through 50

   4.500000000000000   4.600000000000000   4.700000000000000   4.800000000000000   4.900000000000000

  Columns 51 through 55

   5.000000000000000   5.100000000000000   5.200000000000000   5.300000000000000   5.400000000000000

  Columns 56 through 60

   5.500000000000000   5.600000000000000   5.700000000000000   5.800000000000000   5.900000000000000

  Column 61

   6.000000000000000

�Ʊ��ɹ�
��ǰѡ��Raptor�뵱ǰѡ���ϵͳ��
������=0.50000, ��������=0.98039, ��������=0.51000

out_node_index =

     1     2     3     8     9    60


ans =

  Columns 1 through 5

   0.004770000000000   0.261010000000000   0.092400000000000   0.069130000000000   0.512230000000000

  Column 6

   0.060460000000000


inner_code_BER =

  Columns 1 through 5

   0.493564391990778                   0                   0                   0                   0

  Columns 6 through 10

                   0                   0                   0                   0                   0

  Columns 11 through 15

                   0                   0                   0                   0                   0

  Columns 16 through 20

                   0                   0                   0                   0                   0

  Columns 21 through 25

                   0                   0                   0                   0                   0

  Columns 26 through 30

                   0                   0                   0                   0                   0

  Columns 31 through 35

                   0                   0                   0                   0                   0

  Columns 36 through 40

                   0                   0                   0                   0                   0

  Columns 41 through 45

                   0                   0                   0                   0                   0

  Columns 46 through 50

                   0                   0                   0                   0                   0

  Columns 51 through 55

                   0                   0                   0                   0                   0

  Columns 56 through 60

                   0                   0                   0                   0                   0

  Column 61

                   0


outer_code_BER =

  Columns 1 through 5

   0.493564391990779                   0                   0                   0                   0

  Columns 6 through 10

                   0                   0                   0                   0                   0

  Columns 11 through 15

                   0                   0                   0                   0                   0

  Columns 16 through 20

                   0                   0                   0                   0                   0

  Columns 21 through 25

                   0                   0                   0                   0                   0

  Columns 26 through 30

                   0                   0                   0                   0                   0

  Columns 31 through 35

                   0                   0                   0                   0                   0

  Columns 36 through 40

                   0                   0                   0                   0                   0

  Columns 41 through 45

                   0                   0                   0                   0                   0

  Columns 46 through 50

                   0                   0                   0                   0                   0

  Columns 51 through 55

                   0                   0                   0                   0                   0

  Columns 56 through 60

                   0                   0                   0                   0                   0

  Column 61

                   0


inner_code_BER =

  Columns 1 through 5

   0.493564391990778   0.493443811508779                   0                   0                   0

  Columns 6 through 10

                   0                   0                   0                   0                   0

  Columns 11 through 15

                   0                   0                   0                   0                   0

  Columns 16 through 20

                   0                   0                   0                   0                   0

  Columns 21 through 25

                   0                   0                   0                   0                   0

  Columns 26 through 30

                   0                   0                   0                   0                   0

  Columns 31 through 35

                   0                   0                   0                   0                   0

  Columns 36 through 40

                   0                   0                   0                   0                   0

  Columns 41 through 45

                   0                   0                   0                   0                   0

  Columns 46 through 50

                   0                   0                   0                   0                   0

  Columns 51 through 55

                   0                   0                   0                   0                   0

  Columns 56 through 60

                   0                   0                   0                   0                   0

  Column 61

                   0


outer_code_BER =

  Columns 1 through 5

   0.493564391990779   0.493443811508778                   0                   0                   0

  Columns 6 through 10

                   0                   0                   0                   0                   0

  Columns 11 through 15

                   0                   0                   0                   0                   0

  Columns 16 through 20

                   0                   0                   0                   0                   0

  Columns 21 through 25

                   0                   0                   0                   0                   0

  Columns 26 through 30

                   0                   0                   0                   0                   0

  Columns 31 through 35

                   0                   0                   0                   0                   0

  Columns 36 through 40

                   0                   0                   0                   0                   0

  Columns 41 through 45

                   0                   0                   0                   0                   0

  Columns 46 through 50

                   0                   0                   0                   0                   0

  Columns 51 through 55

                   0                   0                   0                   0                   0

  Columns 56 through 60

                   0                   0                   0                   0                   0

  Column 61

                   0


inner_code_BER =

  Columns 1 through 5

   0.493564391990778   0.493443811508779   0.493320606791423                   0                   0

  Columns 6 through 10

                   0                   0                   0                   0                   0

  Columns 11 through 15

                   0                   0                   0                   0                   0

  Columns 16 through 20

                   0                   0                   0                   0                   0

  Columns 21 through 25

                   0                   0                   0                   0                   0

  Columns 26 through 30

                   0                   0                   0                   0                   0

  Columns 31 through 35

                   0                   0                   0                   0                   0

  Columns 36 through 40

                   0                   0                   0                   0                   0

  Columns 41 through 45

                   0                   0                   0                   0                   0

  Columns 46 through 50

                   0                   0                   0                   0                   0

  Columns 51 through 55

                   0                   0                   0                   0                   0

  Columns 56 through 60

                   0                   0                   0                   0                   0

  Column 61

                   0


outer_code_BER =

  Columns 1 through 5

   0.493564391990779   0.493443811508778   0.493320606791422                   0                   0

  Columns 6 through 10

                   0                   0                   0                   0                   0

  Columns 11 through 15

                   0                   0                   0                   0                   0

  Columns 16 through 20

                   0                   0                   0                   0                   0

  Columns 21 through 25

                   0                   0                   0                   0                   0

  Columns 26 through 30

                   0                   0                   0                   0                   0

  Columns 31 through 35

                   0                   0                   0                   0                   0

  Columns 36 through 40

                   0                   0                   0                   0                   0

  Columns 41 through 45

                   0                   0                   0                   0                   0

  Columns 46 through 50

                   0                   0                   0                   0                   0

  Columns 51 through 55

                   0                   0                   0                   0                   0

  Columns 56 through 60

                   0                   0                   0                   0                   0

  Column 61

                   0


inner_code_BER =

  Columns 1 through 5

   0.493564391990778   0.493443811508779   0.493320606791423   0.493194714619031                   0

  Columns 6 through 10

                   0                   0                   0                   0                   0

  Columns 11 through 15

                   0                   0                   0                   0                   0

  Columns 16 through 20

                   0                   0                   0                   0                   0

  Columns 21 through 25

                   0                   0                   0                   0                   0

  Columns 26 through 30

                   0                   0                   0                   0                   0

  Columns 31 through 35

                   0                   0                   0                   0                   0

  Columns 36 through 40

                   0                   0                   0                   0                   0

  Columns 41 through 45

                   0                   0                   0                   0                   0

  Columns 46 through 50

                   0                   0                   0                   0                   0

  Columns 51 through 55

                   0                   0                   0                   0                   0

  Columns 56 through 60

                   0                   0                   0                   0                   0

  Column 61

                   0


outer_code_BER =

  Columns 1 through 5

   0.493564391990779   0.493443811508778   0.493320606791422   0.493194714619031                   0

  Columns 6 through 10

                   0                   0                   0                   0                   0

  Columns 11 through 15

                   0                   0                   0                   0                   0

  Columns 16 through 20

                   0                   0                   0                   0                   0

  Columns 21 through 25

                   0                   0                   0                   0                   0

  Columns 26 through 30

                   0                   0                   0                   0                   0

  Columns 31 through 35

                   0                   0                   0                   0                   0

  Columns 36 through 40

                   0                   0                   0                   0                   0

  Columns 41 through 45

                   0                   0                   0                   0                   0

  Columns 46 through 50

                   0                   0                   0                   0                   0

  Columns 51 through 55

                   0                   0                   0                   0                   0

  Columns 56 through 60

                   0                   0                   0                   0                   0

  Column 61

                   0


inner_code_BER =

  Columns 1 through 5

   0.493564391990778   0.493443811508779   0.493320606791423   0.493194714619031   0.493066070193132

  Columns 6 through 10

                   0                   0                   0                   0                   0

  Columns 11 through 15

                   0                   0                   0                   0                   0

  Columns 16 through 20

                   0                   0                   0                   0                   0

  Columns 21 through 25

                   0                   0                   0                   0                   0

  Columns 26 through 30

                   0                   0                   0                   0                   0

  Columns 31 through 35

                   0                   0                   0                   0                   0

  Columns 36 through 40

                   0                   0                   0                   0                   0

  Columns 41 through 45

                   0                   0                   0                   0                   0

  Columns 46 through 50

                   0                   0                   0                   0                   0

  Columns 51 through 55

                   0                   0                   0                   0                   0

  Columns 56 through 60

                   0                   0                   0                   0                   0

  Column 61

                   0


outer_code_BER =

  Columns 1 through 5

   0.493564391990779   0.493443811508778   0.493320606791422   0.493194714619031   0.493066070193132

  Columns 6 through 10

                   0                   0                   0                   0                   0

  Columns 11 through 15

                   0                   0                   0                   0                   0

  Columns 16 through 20

                   0                   0                   0                   0                   0

  Columns 21 through 25

                   0                   0                   0                   0                   0

  Columns 26 through 30

                   0                   0                   0                   0                   0

  Columns 31 through 35

                   0                   0                   0                   0                   0

  Columns 36 through 40

                   0                   0                   0                   0                   0

  Columns 41 through 45

                   0                   0                   0                   0                   0

  Columns 46 through 50

                   0                   0                   0                   0                   0

  Columns 51 through 55

                   0                   0                   0                   0                   0

  Columns 56 through 60

                   0                   0                   0                   0                   0

  Column 61

                   0


inner_code_BER =

  Columns 1 through 5

   0.493564391990778   0.493443811508779   0.493320606791423   0.493194714619031   0.493066070193132

  Columns 6 through 10

   0.492934607098729                   0                   0                   0                   0

  Columns 11 through 15

                   0                   0                   0                   0                   0

  Columns 16 through 20

                   0                   0                   0                   0                   0

  Columns 21 through 25

                   0                   0                   0                   0                   0

  Columns 26 through 30

                   0                   0                   0                   0                   0

  Columns 31 through 35

                   0                   0                   0                   0                   0

  Columns 36 through 40

                   0                   0                   0                   0                   0

  Columns 41 through 45

                   0                   0                   0                   0                   0

  Columns 46 through 50

                   0                   0                   0                   0                   0

  Columns 51 through 55

                   0                   0                   0                   0                   0

  Columns 56 through 60

                   0                   0                   0                   0                   0

  Column 61

                   0


outer_code_BER =

  Columns 1 through 5

   0.493564391990779   0.493443811508778   0.493320606791422   0.493194714619031   0.493066070193132

  Columns 6 through 10

   0.492934607098729                   0                   0                   0                   0

  Columns 11 through 15

                   0                   0                   0                   0                   0

  Columns 16 through 20

                   0                   0                   0                   0                   0

  Columns 21 through 25

                   0                   0                   0                   0                   0

  Columns 26 through 30

                   0                   0                   0                   0                   0

  Columns 31 through 35

                   0                   0                   0                   0                   0

  Columns 36 through 40

                   0                   0                   0                   0                   0

  Columns 41 through 45

                   0                   0                   0                   0                   0

  Columns 46 through 50

                   0                   0                   0                   0                   0

  Columns 51 through 55

                   0                   0                   0                   0                   0

  Columns 56 through 60

                   0                   0                   0                   0                   0

  Column 61

                   0


inner_code_BER =

  Columns 1 through 5

   0.493564391990778   0.493443811508779   0.493320606791423   0.493194714619031   0.493066070193132

  Columns 6 through 10

   0.492934607098729   0.492800257265856                   0                   0                   0

  Columns 11 through 15

                   0                   0                   0                   0                   0

  Columns 16 through 20

                   0                   0                   0                   0                   0

  Columns 21 through 25

                   0                   0                   0                   0                   0

  Columns 26 through 30

                   0                   0                   0                   0                   0

  Columns 31 through 35

                   0                   0                   0                   0                   0

  Columns 36 through 40

                   0                   0                   0                   0                   0

  Columns 41 through 45

                   0                   0                   0                   0                   0

  Columns 46 through 50

                   0                   0                   0                   0                   0

  Columns 51 through 55

                   0                   0                   0                   0                   0

  Columns 56 through 60

                   0                   0                   0                   0                   0

  Column 61

                   0


outer_code_BER =

  Columns 1 through 5

   0.493564391990779   0.493443811508778   0.493320606791422   0.493194714619031   0.493066070193132

  Columns 6 through 10

   0.492934607098729   0.492800257265856                   0                   0                   0

  Columns 11 through 15

                   0                   0                   0                   0                   0

  Columns 16 through 20

                   0                   0                   0                   0                   0

  Columns 21 through 25

                   0                   0                   0                   0                   0

  Columns 26 through 30

                   0                   0                   0                   0                   0

  Columns 31 through 35

                   0                   0                   0                   0                   0

  Columns 36 through 40

                   0                   0                   0                   0                   0

  Columns 41 through 45

                   0                   0                   0                   0                   0

  Columns 46 through 50

                   0                   0                   0                   0                   0

  Columns 51 through 55

                   0                   0                   0                   0                   0

  Columns 56 through 60

                   0                   0                   0                   0                   0

  Column 61

                   0


inner_code_BER =

  Columns 1 through 5

   0.493564391990778   0.493443811508779   0.493320606791423   0.493194714619031   0.493066070193132

  Columns 6 through 10

   0.492934607098729   0.492800257265856   0.492662950930429                   0                   0

  Columns 11 through 15

                   0                   0                   0                   0                   0

  Columns 16 through 20

                   0                   0                   0                   0                   0

  Columns 21 through 25

                   0                   0                   0                   0                   0

  Columns 26 through 30

                   0                   0                   0                   0                   0

  Columns 31 through 35

                   0                   0                   0                   0                   0

  Columns 36 through 40

                   0                   0                   0                   0                   0

  Columns 41 through 45

                   0                   0                   0                   0                   0

  Columns 46 through 50

                   0                   0                   0                   0                   0

  Columns 51 through 55

                   0                   0                   0                   0                   0

  Columns 56 through 60

                   0                   0                   0                   0                   0

  Column 61

                   0


outer_code_BER =

  Columns 1 through 5

   0.493564391990779   0.493443811508778   0.493320606791422   0.493194714619031   0.493066070193132

  Columns 6 through 10

   0.492934607098729   0.492800257265856   0.492662950930428                   0                   0

  Columns 11 through 15

                   0                   0                   0                   0                   0

  Columns 16 through 20

                   0                   0                   0                   0                   0

  Columns 21 through 25

                   0                   0                   0                   0                   0

  Columns 26 through 30

                   0                   0                   0                   0                   0

  Columns 31 through 35

                   0                   0                   0                   0                   0

  Columns 36 through 40

                   0                   0                   0                   0                   0

  Columns 41 through 45

                   0                   0                   0                   0                   0

  Columns 46 through 50

                   0                   0                   0                   0                   0

  Columns 51 through 55

                   0                   0                   0                   0                   0

  Columns 56 through 60

                   0                   0                   0                   0                   0

  Column 61

                   0


inner_code_BER =

  Columns 1 through 5

   0.493564391990778   0.493443811508779   0.493320606791423   0.493194714619031   0.493066070193132

  Columns 6 through 10

   0.492934607098729   0.492800257265856   0.492662950930429   0.492522616594357                   0

  Columns 11 through 15

                   0                   0                   0                   0                   0

  Columns 16 through 20

                   0                   0                   0                   0                   0

  Columns 21 through 25

                   0                   0                   0                   0                   0

  Columns 26 through 30

                   0                   0                   0                   0                   0

  Columns 31 through 35

                   0                   0                   0                   0                   0

  Columns 36 through 40

                   0                   0                   0                   0                   0

  Columns 41 through 45

                   0                   0                   0                   0                   0

  Columns 46 through 50

                   0                   0                   0                   0                   0

  Columns 51 through 55

                   0                   0                   0                   0                   0

  Columns 56 through 60

                   0                   0                   0                   0                   0

  Column 61

                   0


outer_code_BER =

  Columns 1 through 5

   0.493564391990779   0.493443811508778   0.493320606791422   0.493194714619031   0.493066070193132

  Columns 6 through 10

   0.492934607098729   0.492800257265856   0.492662950930428   0.492522616594356                   0

  Columns 11 through 15

                   0                   0                   0                   0                   0

  Columns 16 through 20

                   0                   0                   0                   0                   0

  Columns 21 through 25

                   0                   0                   0                   0                   0

  Columns 26 through 30

                   0                   0                   0                   0                   0

  Columns 31 through 35

                   0                   0                   0                   0                   0

  Columns 36 through 40

                   0                   0                   0                   0                   0

  Columns 41 through 45

                   0                   0                   0                   0                   0

  Columns 46 through 50

                   0                   0                   0                   0                   0

  Columns 51 through 55

                   0                   0                   0                   0                   0

  Columns 56 through 60

                   0                   0                   0                   0                   0

  Column 61

                   0


inner_code_BER =

  Columns 1 through 5

   0.493564391990778   0.493443811508779   0.493320606791423   0.493194714619031   0.493066070193132

  Columns 6 through 10

   0.492934607098729   0.492800257265856   0.492662950930429   0.492522616594357   0.492379180984969

  Columns 11 through 15

                   0                   0                   0                   0                   0

  Columns 16 through 20

                   0                   0                   0                   0                   0

  Columns 21 through 25

                   0                   0                   0                   0                   0

  Columns 26 through 30

                   0                   0                   0                   0                   0

  Columns 31 through 35

                   0                   0                   0                   0                   0

  Columns 36 through 40

                   0                   0                   0                   0                   0

  Columns 41 through 45

                   0                   0                   0                   0                   0

  Columns 46 through 50

                   0                   0                   0                   0                   0

  Columns 51 through 55

                   0                   0                   0                   0                   0

  Columns 56 through 60

                   0                   0                   0                   0                   0

  Column 61

                   0


outer_code_BER =

  Columns 1 through 5

   0.493564391990779   0.493443811508778   0.493320606791422   0.493194714619031   0.493066070193132

  Columns 6 through 10

   0.492934607098729   0.492800257265856   0.492662950930428   0.492522616594356   0.492379180984968

  Columns 11 through 15

                   0                   0                   0                   0                   0

  Columns 16 through 20

                   0                   0                   0                   0                   0

  Columns 21 through 25

                   0                   0                   0                   0                   0

  Columns 26 through 30

                   0                   0                   0                   0                   0

  Columns 31 through 35

                   0                   0                   0                   0                   0

  Columns 36 through 40

                   0                   0                   0                   0                   0

  Columns 41 through 45

                   0                   0                   0                   0                   0

  Columns 46 through 50

                   0                   0                   0                   0                   0

  Columns 51 through 55

                   0                   0                   0                   0                   0

  Columns 56 through 60

                   0                   0                   0                   0                   0

  Column 61

                   0


inner_code_BER =

  Columns 1 through 5

   0.493564391990778   0.493443811508779   0.493320606791423   0.493194714619031   0.493066070193132

  Columns 6 through 10

   0.492934607098729   0.492800257265856   0.492662950930429   0.492522616594357   0.492379180984969

  Columns 11 through 15

   0.492232569013685                   0                   0                   0                   0

  Columns 16 through 20

                   0                   0                   0                   0                   0

  Columns 21 through 25

                   0                   0                   0                   0                   0

  Columns 26 through 30

                   0                   0                   0                   0                   0

  Columns 31 through 35

                   0                   0                   0                   0                   0

  Columns 36 through 40

                   0                   0                   0                   0                   0

  Columns 41 through 45

                   0                   0                   0                   0                   0

  Columns 46 through 50

                   0                   0                   0                   0                   0

  Columns 51 through 55

                   0                   0                   0                   0                   0

  Columns 56 through 60

                   0                   0                   0                   0                   0

  Column 61

                   0


outer_code_BER =

  Columns 1 through 5

   0.493564391990779   0.493443811508778   0.493320606791422   0.493194714619031   0.493066070193132

  Columns 6 through 10

   0.492934607098729   0.492800257265856   0.492662950930428   0.492522616594356   0.492379180984968

  Columns 11 through 15

   0.492232569013686                   0                   0                   0                   0

  Columns 16 through 20

                   0                   0                   0                   0                   0

  Columns 21 through 25

                   0                   0                   0                   0                   0

  Columns 26 through 30

                   0                   0                   0                   0                   0

  Columns 31 through 35

                   0                   0                   0                   0                   0

  Columns 36 through 40

                   0                   0                   0                   0                   0

  Columns 41 through 45

                   0                   0                   0                   0                   0

  Columns 46 through 50

                   0                   0                   0                   0                   0

  Columns 51 through 55

                   0                   0                   0                   0                   0

  Columns 56 through 60

                   0                   0                   0                   0                   0

  Column 61

                   0


inner_code_BER =

  Columns 1 through 5

   0.493564391990778   0.493443811508779   0.493320606791423   0.493194714619031   0.493066070193132

  Columns 6 through 10

   0.492934607098729   0.492800257265856   0.492662950930429   0.492522616594357   0.492379180984969

  Columns 11 through 15

   0.492232569013685   0.492082703734013                   0                   0                   0

  Columns 16 through 20

                   0                   0                   0                   0                   0

  Columns 21 through 25

                   0                   0                   0                   0                   0

  Columns 26 through 30

                   0                   0                   0                   0                   0

  Columns 31 through 35

                   0                   0                   0                   0                   0

  Columns 36 through 40

                   0                   0                   0                   0                   0

  Columns 41 through 45

                   0                   0                   0                   0                   0

  Columns 46 through 50

                   0                   0                   0                   0                   0

  Columns 51 through 55

                   0                   0                   0                   0                   0

  Columns 56 through 60

                   0                   0                   0                   0                   0

  Column 61

                   0


outer_code_BER =

  Columns 1 through 5

   0.493564391990779   0.493443811508778   0.493320606791422   0.493194714619031   0.493066070193132

  Columns 6 through 10

   0.492934607098729   0.492800257265856   0.492662950930428   0.492522616594356   0.492379180984968

  Columns 11 through 15

   0.492232569013686   0.492082703734013                   0                   0                   0

  Columns 16 through 20

                   0                   0                   0                   0                   0

  Columns 21 through 25

                   0                   0                   0                   0                   0

  Columns 26 through 30

                   0                   0                   0                   0                   0

  Columns 31 through 35

                   0                   0                   0                   0                   0

  Columns 36 through 40

                   0                   0                   0                   0                   0

  Columns 41 through 45

                   0                   0                   0                   0                   0

  Columns 46 through 50

                   0                   0                   0                   0                   0

  Columns 51 through 55

                   0                   0                   0                   0                   0

  Columns 56 through 60

                   0                   0                   0                   0                   0

  Column 61

                   0


inner_code_BER =

  Columns 1 through 5

   0.493564391990778   0.493443811508779   0.493320606791423   0.493194714619031   0.493066070193132

  Columns 6 through 10

   0.492934607098729   0.492800257265856   0.492662950930429   0.492522616594357   0.492379180984969

  Columns 11 through 15

   0.492232569013685   0.492082703734013   0.491929506298792                   0                   0

  Columns 16 through 20

                   0                   0                   0                   0                   0

  Columns 21 through 25

                   0                   0                   0                   0                   0

  Columns 26 through 30

                   0                   0                   0                   0                   0

  Columns 31 through 35

                   0                   0                   0                   0                   0

  Columns 36 through 40

                   0                   0                   0                   0                   0

  Columns 41 through 45

                   0                   0                   0                   0                   0

  Columns 46 through 50

                   0                   0                   0                   0                   0

  Columns 51 through 55

                   0                   0                   0                   0                   0

  Columns 56 through 60

                   0                   0                   0                   0                   0

  Column 61

                   0


outer_code_BER =

  Columns 1 through 5

   0.493564391990779   0.493443811508778   0.493320606791422   0.493194714619031   0.493066070193132

  Columns 6 through 10

   0.492934607098729   0.492800257265856   0.492662950930428   0.492522616594356   0.492379180984968

  Columns 11 through 15

   0.492232569013686   0.492082703734013   0.491929506298792                   0                   0

  Columns 16 through 20

                   0                   0                   0                   0                   0

  Columns 21 through 25

                   0                   0                   0                   0                   0

  Columns 26 through 30

                   0                   0                   0                   0                   0

  Columns 31 through 35

                   0                   0                   0                   0                   0

  Columns 36 through 40

                   0                   0                   0                   0                   0

  Columns 41 through 45

                   0                   0                   0                   0                   0

  Columns 46 through 50

                   0                   0                   0                   0                   0

  Columns 51 through 55

                   0                   0                   0                   0                   0

  Columns 56 through 60

                   0                   0                   0                   0                   0

  Column 61

                   0


inner_code_BER =

  Columns 1 through 5

   0.493564391990778   0.493443811508779   0.493320606791423   0.493194714619031   0.493066070193132

  Columns 6 through 10

   0.492934607098729   0.492800257265856   0.492662950930429   0.492522616594357   0.492379180984969

  Columns 11 through 15

   0.492232569013685   0.492082703734013   0.491929506298792   0.491772895916751                   0

  Columns 16 through 20

                   0                   0                   0                   0                   0

  Columns 21 through 25

                   0                   0                   0                   0                   0

  Columns 26 through 30

                   0                   0                   0                   0                   0

  Columns 31 through 35

                   0                   0                   0                   0                   0

  Columns 36 through 40

                   0                   0                   0                   0                   0

  Columns 41 through 45

                   0                   0                   0                   0                   0

  Columns 46 through 50

                   0                   0                   0                   0                   0

  Columns 51 through 55

                   0                   0                   0                   0                   0

  Columns 56 through 60

                   0                   0                   0                   0                   0

  Column 61

                   0


outer_code_BER =

  Columns 1 through 5

   0.493564391990779   0.493443811508778   0.493320606791422   0.493194714619031   0.493066070193132

  Columns 6 through 10

   0.492934607098729   0.492800257265856   0.492662950930428   0.492522616594356   0.492379180984968

  Columns 11 through 15

   0.492232569013686   0.492082703734013   0.491929506298792   0.491772895916752                   0

  Columns 16 through 20

                   0                   0                   0                   0                   0

  Columns 21 through 25

                   0                   0                   0                   0                   0

  Columns 26 through 30

                   0                   0                   0                   0                   0

  Columns 31 through 35

                   0                   0                   0                   0                   0

  Columns 36 through 40

                   0                   0                   0                   0                   0

  Columns 41 through 45

                   0                   0                   0                   0                   0

  Columns 46 through 50

                   0                   0                   0                   0                   0

  Columns 51 through 55

                   0                   0                   0                   0                   0

  Columns 56 through 60

                   0                   0                   0                   0                   0

  Column 61

                   0


inner_code_BER =

  Columns 1 through 5

   0.493564391990778   0.493443811508779   0.493320606791423   0.493194714619031   0.493066070193132

  Columns 6 through 10

   0.492934607098729   0.492800257265856   0.492662950930429   0.492522616594357   0.492379180984969

  Columns 11 through 15

   0.492232569013685   0.492082703734013   0.491929506298792   0.491772895916751   0.491612789808374

  Columns 16 through 20

                   0                   0                   0                   0                   0

  Columns 21 through 25

                   0                   0                   0                   0                   0

  Columns 26 through 30

                   0                   0                   0                   0                   0

  Columns 31 through 35

                   0                   0                   0                   0                   0

  Columns 36 through 40

                   0                   0                   0                   0                   0

  Columns 41 through 45

                   0                   0                   0                   0                   0

  Columns 46 through 50

                   0                   0                   0                   0                   0

  Columns 51 through 55

                   0                   0                   0                   0                   0

  Columns 56 through 60

                   0                   0                   0                   0                   0

  Column 61

                   0


outer_code_BER =

  Columns 1 through 5

   0.493564391990779   0.493443811508778   0.493320606791422   0.493194714619031   0.493066070193132

  Columns 6 through 10

   0.492934607098729   0.492800257265856   0.492662950930428   0.492522616594356   0.492379180984968

  Columns 11 through 15

   0.492232569013686   0.492082703734013   0.491929506298792   0.491772895916752   0.491612789808375

  Columns 16 through 20

                   0                   0                   0                   0                   0

  Columns 21 through 25

                   0                   0                   0                   0                   0

  Columns 26 through 30

                   0                   0                   0                   0                   0

  Columns 31 through 35

                   0                   0                   0                   0                   0

  Columns 36 through 40

                   0                   0                   0                   0                   0

  Columns 41 through 45

                   0                   0                   0                   0                   0

  Columns 46 through 50

                   0                   0                   0                   0                   0

  Columns 51 through 55

                   0                   0                   0                   0                   0

  Columns 56 through 60

                   0                   0                   0                   0                   0

  Column 61

                   0


inner_code_BER =

  Columns 1 through 5

   0.493564391990778   0.493443811508779   0.493320606791423   0.493194714619031   0.493066070193132

  Columns 6 through 10

   0.492934607098729   0.492800257265856   0.492662950930429   0.492522616594357   0.492379180984969

  Columns 11 through 15

   0.492232569013685   0.492082703734013   0.491929506298792   0.491772895916751   0.491612789808374

  Columns 16 through 20

   0.491449103161023                   0                   0                   0                   0

  Columns 21 through 25

                   0                   0                   0                   0                   0

  Columns 26 through 30

                   0                   0                   0                   0                   0

  Columns 31 through 35

                   0                   0                   0                   0                   0

  Columns 36 through 40

                   0                   0                   0                   0                   0

  Columns 41 through 45

                   0                   0                   0                   0                   0

  Columns 46 through 50

                   0                   0                   0                   0                   0

  Columns 51 through 55

                   0                   0                   0                   0                   0

  Columns 56 through 60

                   0                   0                   0                   0                   0

  Column 61

                   0


outer_code_BER =

  Columns 1 through 5

   0.493564391990779   0.493443811508778   0.493320606791422   0.493194714619031   0.493066070193132

  Columns 6 through 10

   0.492934607098729   0.492800257265856   0.492662950930428   0.492522616594356   0.492379180984968

  Columns 11 through 15

   0.492232569013686   0.492082703734013   0.491929506298792   0.491772895916752   0.491612789808375

  Columns 16 through 20

   0.491449103161025                   0                   0                   0                   0

  Columns 21 through 25

                   0                   0                   0                   0                   0

  Columns 26 through 30

                   0                   0                   0                   0                   0

  Columns 31 through 35

                   0                   0                   0                   0                   0

  Columns 36 through 40

                   0                   0                   0                   0                   0

  Columns 41 through 45

                   0                   0                   0                   0                   0

  Columns 46 through 50

                   0                   0                   0                   0                   0

  Columns 51 through 55

                   0                   0                   0                   0                   0

  Columns 56 through 60

                   0                   0                   0                   0                   0

  Column 61

                   0


inner_code_BER =

  Columns 1 through 5

   0.493564391990778   0.493443811508779   0.493320606791423   0.493194714619031   0.493066070193132

  Columns 6 through 10

   0.492934607098729   0.492800257265856   0.492662950930429   0.492522616594357   0.492379180984969

  Columns 11 through 15

   0.492232569013685   0.492082703734013   0.491929506298792   0.491772895916751   0.491612789808374

  Columns 16 through 20

   0.491449103161023   0.491281749083432                   0                   0                   0

  Columns 21 through 25

                   0                   0                   0                   0                   0

  Columns 26 through 30

                   0                   0                   0                   0                   0

  Columns 31 through 35

                   0                   0                   0                   0                   0

  Columns 36 through 40

                   0                   0                   0                   0                   0

  Columns 41 through 45

                   0                   0                   0                   0                   0

  Columns 46 through 50

                   0                   0                   0                   0                   0

  Columns 51 through 55

                   0                   0                   0                   0                   0

  Columns 56 through 60

                   0                   0                   0                   0                   0

  Column 61

                   0


outer_code_BER =

  Columns 1 through 5

   0.493564391990779   0.493443811508778   0.493320606791422   0.493194714619031   0.493066070193132

  Columns 6 through 10

   0.492934607098729   0.492800257265856   0.492662950930428   0.492522616594356   0.492379180984968

  Columns 11 through 15

   0.492232569013686   0.492082703734013   0.491929506298792   0.491772895916752   0.491612789808375

  Columns 16 through 20

   0.491449103161025   0.491281749083432                   0                   0                   0

  Columns 21 through 25

                   0                   0                   0                   0                   0

  Columns 26 through 30

                   0                   0                   0                   0                   0

  Columns 31 through 35

                   0                   0                   0                   0                   0

  Columns 36 through 40

                   0                   0                   0                   0                   0

  Columns 41 through 45

                   0                   0                   0                   0                   0

  Columns 46 through 50

                   0                   0                   0                   0                   0

  Columns 51 through 55

                   0                   0                   0                   0                   0

  Columns 56 through 60

                   0                   0                   0                   0                   0

  Column 61

                   0


inner_code_BER =

  Columns 1 through 5

   0.493564391990778   0.493443811508779   0.493320606791423   0.493194714619031   0.493066070193132

  Columns 6 through 10

   0.492934607098729   0.492800257265856   0.492662950930429   0.492522616594357   0.492379180984969

  Columns 11 through 15

   0.492232569013685   0.492082703734013   0.491929506298792   0.491772895916751   0.491612789808374

  Columns 16 through 20

   0.491449103161023   0.491281749083432   0.491110638559454                   0                   0

  Columns 21 through 25

                   0                   0                   0                   0                   0

  Columns 26 through 30

                   0                   0                   0                   0                   0

  Columns 31 through 35

                   0                   0                   0                   0                   0

  Columns 36 through 40

                   0                   0                   0                   0                   0

  Columns 41 through 45

                   0                   0                   0                   0                   0

  Columns 46 through 50

                   0                   0                   0                   0                   0

  Columns 51 through 55

                   0                   0                   0                   0                   0

  Columns 56 through 60

                   0                   0                   0                   0                   0

  Column 61

                   0


outer_code_BER =

  Columns 1 through 5

   0.493564391990779   0.493443811508778   0.493320606791422   0.493194714619031   0.493066070193132

  Columns 6 through 10

   0.492934607098729   0.492800257265856   0.492662950930428   0.492522616594356   0.492379180984968

  Columns 11 through 15

   0.492232569013686   0.492082703734013   0.491929506298792   0.491772895916752   0.491612789808375

  Columns 16 through 20

   0.491449103161025   0.491281749083432   0.491110638559454                   0                   0

  Columns 21 through 25

                   0                   0                   0                   0                   0

  Columns 26 through 30

                   0                   0                   0                   0                   0

  Columns 31 through 35

                   0                   0                   0                   0                   0

  Columns 36 through 40

                   0                   0                   0                   0                   0

  Columns 41 through 45

                   0                   0                   0                   0                   0

  Columns 46 through 50

                   0                   0                   0                   0                   0

  Columns 51 through 55

                   0                   0                   0                   0                   0

  Columns 56 through 60

                   0                   0                   0                   0                   0

  Column 61

                   0


inner_code_BER =

  Columns 1 through 5

   0.493564391990778   0.493443811508779   0.493320606791423   0.493194714619031   0.493066070193132

  Columns 6 through 10

   0.492934607098729   0.492800257265856   0.492662950930429   0.492522616594357   0.492379180984969

  Columns 11 through 15

   0.492232569013685   0.492082703734013   0.491929506298792   0.491772895916751   0.491612789808374

  Columns 16 through 20

   0.491449103161023   0.491281749083432   0.491110638559454   0.490935680401183                   0

  Columns 21 through 25

                   0                   0                   0                   0                   0

  Columns 26 through 30

                   0                   0                   0                   0                   0

  Columns 31 through 35

                   0                   0                   0                   0                   0

  Columns 36 through 40

                   0                   0                   0                   0                   0

  Columns 41 through 45

                   0                   0                   0                   0                   0

  Columns 46 through 50

                   0                   0                   0                   0                   0

  Columns 51 through 55

                   0                   0                   0                   0                   0

  Columns 56 through 60

                   0                   0                   0                   0                   0

  Column 61

                   0


outer_code_BER =

  Columns 1 through 5

   0.493564391990779   0.493443811508778   0.493320606791422   0.493194714619031   0.493066070193132

  Columns 6 through 10

   0.492934607098729   0.492800257265856   0.492662950930428   0.492522616594356   0.492379180984968

  Columns 11 through 15

   0.492232569013686   0.492082703734013   0.491929506298792   0.491772895916752   0.491612789808375

  Columns 16 through 20

   0.491449103161025   0.491281749083432   0.491110638559454   0.490935680401183                   0

  Columns 21 through 25

                   0                   0                   0                   0                   0

  Columns 26 through 30

                   0                   0                   0                   0                   0

  Columns 31 through 35

                   0                   0                   0                   0                   0

  Columns 36 through 40

                   0                   0                   0                   0                   0

  Columns 41 through 45

                   0                   0                   0                   0                   0

  Columns 46 through 50

                   0                   0                   0                   0                   0

  Columns 51 through 55

                   0                   0                   0                   0                   0

  Columns 56 through 60

                   0                   0                   0                   0                   0

  Column 61

                   0


inner_code_BER =

  Columns 1 through 5

   0.493564391990778   0.493443811508779   0.493320606791423   0.493194714619031   0.493066070193132

  Columns 6 through 10

   0.492934607098729   0.492800257265856   0.492662950930429   0.492522616594357   0.492379180984969

  Columns 11 through 15

   0.492232569013685   0.492082703734013   0.491929506298792   0.491772895916751   0.491612789808374

  Columns 16 through 20

   0.491449103161023   0.491281749083432   0.491110638559454   0.490935680401183   0.490756781201384

  Columns 21 through 25

                   0                   0                   0                   0                   0

  Columns 26 through 30

                   0                   0                   0                   0                   0

  Columns 31 through 35

                   0                   0                   0                   0                   0

  Columns 36 through 40

                   0                   0                   0                   0                   0

  Columns 41 through 45

                   0                   0                   0                   0                   0

  Columns 46 through 50

                   0                   0                   0                   0                   0

  Columns 51 through 55

                   0                   0                   0                   0                   0

  Columns 56 through 60

                   0                   0                   0                   0                   0

  Column 61

                   0


outer_code_BER =

  Columns 1 through 5

   0.493564391990779   0.493443811508778   0.493320606791422   0.493194714619031   0.493066070193132

  Columns 6 through 10

   0.492934607098729   0.492800257265856   0.492662950930428   0.492522616594356   0.492379180984968

  Columns 11 through 15

   0.492232569013686   0.492082703734013   0.491929506298792   0.491772895916752   0.491612789808375

  Columns 16 through 20

   0.491449103161025   0.491281749083432   0.491110638559454   0.490935680401183   0.490756781201385

  Columns 21 through 25

                   0                   0                   0                   0                   0

  Columns 26 through 30

                   0                   0                   0                   0                   0

  Columns 31 through 35

                   0                   0                   0                   0                   0

  Columns 36 through 40

                   0                   0                   0                   0                   0

  Columns 41 through 45

                   0                   0                   0                   0                   0

  Columns 46 through 50

                   0                   0                   0                   0                   0

  Columns 51 through 55

                   0                   0                   0                   0                   0

  Columns 56 through 60

                   0                   0                   0                   0                   0

  Column 61

                   0


inner_code_BER =

  Columns 1 through 5

   0.493564391990778   0.493443811508779   0.493320606791423   0.493194714619031   0.493066070193132

  Columns 6 through 10

   0.492934607098729   0.492800257265856   0.492662950930429   0.492522616594357   0.492379180984969

  Columns 11 through 15

   0.492232569013685   0.492082703734013   0.491929506298792   0.491772895916751   0.491612789808374

  Columns 16 through 20

   0.491449103161023   0.491281749083432   0.491110638559454   0.490935680401183   0.490756781201384

  Columns 21 through 25

   0.490573845285290                   0                   0                   0                   0

  Columns 26 through 30

                   0                   0                   0                   0                   0

  Columns 31 through 35

                   0                   0                   0                   0                   0

  Columns 36 through 40

                   0                   0                   0                   0                   0

  Columns 41 through 45

                   0                   0                   0                   0                   0

  Columns 46 through 50

                   0                   0                   0                   0                   0

  Columns 51 through 55

                   0                   0                   0                   0                   0

  Columns 56 through 60

                   0                   0                   0                   0                   0

  Column 61

                   0


outer_code_BER =

  Columns 1 through 5

   0.493564391990779   0.493443811508778   0.493320606791422   0.493194714619031   0.493066070193132

  Columns 6 through 10

   0.492934607098729   0.492800257265856   0.492662950930428   0.492522616594356   0.492379180984968

  Columns 11 through 15

   0.492232569013686   0.492082703734013   0.491929506298792   0.491772895916752   0.491612789808375

  Columns 16 through 20

   0.491449103161025   0.491281749083432   0.491110638559454   0.490935680401183   0.490756781201385

  Columns 21 through 25

   0.490573845285290                   0                   0                   0                   0

  Columns 26 through 30

                   0                   0                   0                   0                   0

  Columns 31 through 35

                   0                   0                   0                   0                   0

  Columns 36 through 40

                   0                   0                   0                   0                   0

  Columns 41 through 45

                   0                   0                   0                   0                   0

  Columns 46 through 50

                   0                   0                   0                   0                   0

  Columns 51 through 55

                   0                   0                   0                   0                   0

  Columns 56 through 60

                   0                   0                   0                   0                   0

  Column 61

                   0


inner_code_BER =

  Columns 1 through 5

   0.493564391990778   0.493443811508779   0.493320606791423   0.493194714619031   0.493066070193132

  Columns 6 through 10

   0.492934607098729   0.492800257265856   0.492662950930429   0.492522616594357   0.492379180984969

  Columns 11 through 15

   0.492232569013685   0.492082703734013   0.491929506298792   0.491772895916751   0.491612789808374

  Columns 16 through 20

   0.491449103161023   0.491281749083432   0.491110638559454   0.490935680401183   0.490756781201384

  Columns 21 through 25

   0.490573845285290   0.490386774661733                   0                   0                   0

  Columns 26 through 30

                   0                   0                   0                   0                   0

  Columns 31 through 35

                   0                   0                   0                   0                   0

  Columns 36 through 40

                   0                   0                   0                   0                   0

  Columns 41 through 45

                   0                   0                   0                   0                   0

  Columns 46 through 50

                   0                   0                   0                   0                   0

  Columns 51 through 55

                   0                   0                   0                   0                   0

  Columns 56 through 60

                   0                   0                   0                   0                   0

  Column 61

                   0


outer_code_BER =

  Columns 1 through 5

   0.493564391990779   0.493443811508778   0.493320606791422   0.493194714619031   0.493066070193132

  Columns 6 through 10

   0.492934607098729   0.492800257265856   0.492662950930428   0.492522616594356   0.492379180984968

  Columns 11 through 15

   0.492232569013686   0.492082703734013   0.491929506298792   0.491772895916752   0.491612789808375

  Columns 16 through 20

   0.491449103161025   0.491281749083432   0.491110638559454   0.490935680401183   0.490756781201385

  Columns 21 through 25

   0.490573845285290   0.490386774661733                   0                   0                   0

  Columns 26 through 30

                   0                   0                   0                   0                   0

  Columns 31 through 35

                   0                   0                   0                   0                   0

  Columns 36 through 40

                   0                   0                   0                   0                   0

  Columns 41 through 45

                   0                   0                   0                   0                   0

  Columns 46 through 50

                   0                   0                   0                   0                   0

  Columns 51 through 55

                   0                   0                   0                   0                   0

  Columns 56 through 60

                   0                   0                   0                   0                   0

  Column 61

                   0


inner_code_BER =

  Columns 1 through 5

   0.493564391990778   0.493443811508779   0.493320606791423   0.493194714619031   0.493066070193132

  Columns 6 through 10

   0.492934607098729   0.492800257265856   0.492662950930429   0.492522616594357   0.492379180984969

  Columns 11 through 15

   0.492232569013685   0.492082703734013   0.491929506298792   0.491772895916751   0.491612789808374

  Columns 16 through 20

   0.491449103161023   0.491281749083432   0.491110638559454   0.490935680401183   0.490756781201384

  Columns 21 through 25

   0.490573845285290   0.490386774661733   0.490195468973683                   0                   0

  Columns 26 through 30

                   0                   0                   0                   0                   0

  Columns 31 through 35

                   0                   0                   0                   0                   0

  Columns 36 through 40

                   0                   0                   0                   0                   0

  Columns 41 through 45

                   0                   0                   0                   0                   0

  Columns 46 through 50

                   0                   0                   0                   0                   0

  Columns 51 through 55

                   0                   0                   0                   0                   0

  Columns 56 through 60

                   0                   0                   0                   0                   0

  Column 61

                   0


outer_code_BER =

  Columns 1 through 5

   0.493564391990779   0.493443811508778   0.493320606791422   0.493194714619031   0.493066070193132

  Columns 6 through 10

   0.492934607098729   0.492800257265856   0.492662950930428   0.492522616594356   0.492379180984968

  Columns 11 through 15

   0.492232569013686   0.492082703734013   0.491929506298792   0.491772895916752   0.491612789808375

  Columns 16 through 20

   0.491449103161025   0.491281749083432   0.491110638559454   0.490935680401183   0.490756781201385

  Columns 21 through 25

   0.490573845285290   0.490386774661733   0.490195468973685                   0                   0

  Columns 26 through 30

                   0                   0                   0                   0                   0

  Columns 31 through 35

                   0                   0                   0                   0                   0

  Columns 36 through 40

                   0                   0                   0                   0                   0

  Columns 41 through 45

                   0                   0                   0                   0                   0

  Columns 46 through 50

                   0                   0                   0                   0                   0

  Columns 51 through 55

                   0                   0                   0                   0                   0

  Columns 56 through 60

                   0                   0                   0                   0                   0

  Column 61

                   0


inner_code_BER =

  Columns 1 through 5

   0.493564391990778   0.493443811508779   0.493320606791423   0.493194714619031   0.493066070193132

  Columns 6 through 10

   0.492934607098729   0.492800257265856   0.492662950930429   0.492522616594357   0.492379180984969

  Columns 11 through 15

   0.492232569013685   0.492082703734013   0.491929506298792   0.491772895916751   0.491612789808374

  Columns 16 through 20

   0.491449103161023   0.491281749083432   0.491110638559454   0.490935680401183   0.490756781201384

  Columns 21 through 25

   0.490573845285290   0.490386774661733   0.490195468973683   0.489999825448162                   0

  Columns 26 through 30

                   0                   0                   0                   0                   0

  Columns 31 through 35

                   0                   0                   0                   0                   0

  Columns 36 through 40

                   0                   0                   0                   0                   0

  Columns 41 through 45

                   0                   0                   0                   0                   0

  Columns 46 through 50

                   0                   0                   0                   0                   0

  Columns 51 through 55

                   0                   0                   0                   0                   0

  Columns 56 through 60

                   0                   0                   0                   0                   0

  Column 61

                   0


outer_code_BER =

  Columns 1 through 5

   0.493564391990779   0.493443811508778   0.493320606791422   0.493194714619031   0.493066070193132

  Columns 6 through 10

   0.492934607098729   0.492800257265856   0.492662950930428   0.492522616594356   0.492379180984968

  Columns 11 through 15

   0.492232569013686   0.492082703734013   0.491929506298792   0.491772895916752   0.491612789808375

  Columns 16 through 20

   0.491449103161025   0.491281749083432   0.491110638559454   0.490935680401183   0.490756781201385

  Columns 21 through 25

   0.490573845285290   0.490386774661733   0.490195468973685   0.489999825448161                   0

  Columns 26 through 30

                   0                   0                   0                   0                   0

  Columns 31 through 35

                   0                   0                   0                   0                   0

  Columns 36 through 40

                   0                   0                   0                   0                   0

  Columns 41 through 45

                   0                   0                   0                   0                   0

  Columns 46 through 50

                   0                   0                   0                   0                   0

  Columns 51 through 55

                   0                   0                   0                   0                   0

  Columns 56 through 60

                   0                   0                   0                   0                   0

  Column 61

                   0


inner_code_BER =

  Columns 1 through 5

   0.493564391990778   0.493443811508779   0.493320606791423   0.493194714619031   0.493066070193132

  Columns 6 through 10

   0.492934607098729   0.492800257265856   0.492662950930429   0.492522616594357   0.492379180984969

  Columns 11 through 15

   0.492232569013685   0.492082703734013   0.491929506298792   0.491772895916751   0.491612789808374

  Columns 16 through 20

   0.491449103161023   0.491281749083432   0.491110638559454   0.490935680401183   0.490756781201384

  Columns 21 through 25

   0.490573845285290   0.490386774661733   0.490195468973683   0.489999825448162   0.489799738845542

  Columns 26 through 30

                   0                   0                   0                   0                   0

  Columns 31 through 35

                   0                   0                   0                   0                   0

  Columns 36 through 40

                   0                   0                   0                   0                   0

  Columns 41 through 45

                   0                   0                   0                   0                   0

  Columns 46 through 50

                   0                   0                   0                   0                   0

  Columns 51 through 55

                   0                   0                   0                   0                   0

  Columns 56 through 60

                   0                   0                   0                   0                   0

  Column 61

                   0


outer_code_BER =

  Columns 1 through 5

   0.493564391990779   0.493443811508778   0.493320606791422   0.493194714619031   0.493066070193132

  Columns 6 through 10

   0.492934607098729   0.492800257265856   0.492662950930428   0.492522616594356   0.492379180984968

  Columns 11 through 15

   0.492232569013686   0.492082703734013   0.491929506298792   0.491772895916752   0.491612789808375

  Columns 16 through 20

   0.491449103161025   0.491281749083432   0.491110638559454   0.490935680401183   0.490756781201385

  Columns 21 through 25

   0.490573845285290   0.490386774661733   0.490195468973685   0.489999825448161   0.489799738845542

  Columns 26 through 30

                   0                   0                   0                   0                   0

  Columns 31 through 35

                   0                   0                   0                   0                   0

  Columns 36 through 40

                   0                   0                   0                   0                   0

  Columns 41 through 45

                   0                   0                   0                   0                   0

  Columns 46 through 50

                   0                   0                   0                   0                   0

  Columns 51 through 55

                   0                   0                   0                   0                   0

  Columns 56 through 60

                   0                   0                   0                   0                   0

  Column 61

                   0


inner_code_BER =

  Columns 1 through 5

   0.493564391990778   0.493443811508779   0.493320606791423   0.493194714619031   0.493066070193132

  Columns 6 through 10

   0.492934607098729   0.492800257265856   0.492662950930429   0.492522616594357   0.492379180984969

  Columns 11 through 15

   0.492232569013685   0.492082703734013   0.491929506298792   0.491772895916751   0.491612789808374

  Columns 16 through 20

   0.491449103161023   0.491281749083432   0.491110638559454   0.490935680401183   0.490756781201384

  Columns 21 through 25

   0.490573845285290   0.490386774661733   0.490195468973683   0.489999825448162   0.489799738845542

  Columns 26 through 30

   0.489595101408318                   0                   0                   0                   0

  Columns 31 through 35

                   0                   0                   0                   0                   0

  Columns 36 through 40

                   0                   0                   0                   0                   0

  Columns 41 through 45

                   0                   0                   0                   0                   0

  Columns 46 through 50

                   0                   0                   0                   0                   0

  Columns 51 through 55

                   0                   0                   0                   0                   0

  Columns 56 through 60

                   0                   0                   0                   0                   0

  Column 61

                   0


outer_code_BER =

  Columns 1 through 5

   0.493564391990779   0.493443811508778   0.493320606791422   0.493194714619031   0.493066070193132

  Columns 6 through 10

   0.492934607098729   0.492800257265856   0.492662950930428   0.492522616594356   0.492379180984968

  Columns 11 through 15

   0.492232569013686   0.492082703734013   0.491929506298792   0.491772895916752   0.491612789808375

  Columns 16 through 20

   0.491449103161025   0.491281749083432   0.491110638559454   0.490935680401183   0.490756781201385

  Columns 21 through 25

   0.490573845285290   0.490386774661733   0.490195468973685   0.489999825448161   0.489799738845542

  Columns 26 through 30

   0.489595101408318                   0                   0                   0                   0

  Columns 31 through 35

                   0                   0                   0                   0                   0

  Columns 36 through 40

                   0                   0                   0                   0                   0

  Columns 41 through 45

                   0                   0                   0                   0                   0

  Columns 46 through 50

                   0                   0                   0                   0                   0

  Columns 51 through 55

                   0                   0                   0                   0                   0

  Columns 56 through 60

                   0                   0                   0                   0                   0

  Column 61

                   0


inner_code_BER =

  Columns 1 through 5

   0.493564391990778   0.493443811508779   0.493320606791423   0.493194714619031   0.493066070193132

  Columns 6 through 10

   0.492934607098729   0.492800257265856   0.492662950930429   0.492522616594357   0.492379180984969

  Columns 11 through 15

   0.492232569013685   0.492082703734013   0.491929506298792   0.491772895916751   0.491612789808374

  Columns 16 through 20

   0.491449103161023   0.491281749083432   0.491110638559454   0.490935680401183   0.490756781201384

  Columns 21 through 25

   0.490573845285290   0.490386774661733   0.490195468973683   0.489999825448162   0.489799738845542

  Columns 26 through 30

   0.489595101408318   0.489385802809266                   0                   0                   0

  Columns 31 through 35

                   0                   0                   0                   0                   0

  Columns 36 through 40

                   0                   0                   0                   0                   0

  Columns 41 through 45

                   0                   0                   0                   0                   0

  Columns 46 through 50

                   0                   0                   0                   0                   0

  Columns 51 through 55

                   0                   0                   0                   0                   0

  Columns 56 through 60

                   0                   0                   0                   0                   0

  Column 61

                   0


outer_code_BER =

  Columns 1 through 5

   0.493564391990779   0.493443811508778   0.493320606791422   0.493194714619031   0.493066070193132

  Columns 6 through 10

   0.492934607098729   0.492800257265856   0.492662950930428   0.492522616594356   0.492379180984968

  Columns 11 through 15

   0.492232569013686   0.492082703734013   0.491929506298792   0.491772895916752   0.491612789808375

  Columns 16 through 20

   0.491449103161025   0.491281749083432   0.491110638559454   0.490935680401183   0.490756781201385

  Columns 21 through 25

   0.490573845285290   0.490386774661733   0.490195468973685   0.489999825448161   0.489799738845542

  Columns 26 through 30

   0.489595101408318   0.489385802809265                   0                   0                   0

  Columns 31 through 35

                   0                   0                   0                   0                   0

  Columns 36 through 40

                   0                   0                   0                   0                   0

  Columns 41 through 45

                   0                   0                   0                   0                   0

  Columns 46 through 50

                   0                   0                   0                   0                   0

  Columns 51 through 55

                   0                   0                   0                   0                   0

  Columns 56 through 60

                   0                   0                   0                   0                   0

  Column 61

                   0


inner_code_BER =

  Columns 1 through 5

   0.493564391990778   0.493443811508779   0.493320606791423   0.493194714619031   0.493066070193132

  Columns 6 through 10

   0.492934607098729   0.492800257265856   0.492662950930429   0.492522616594357   0.492379180984969

  Columns 11 through 15

   0.492232569013685   0.492082703734013   0.491929506298792   0.491772895916751   0.491612789808374

  Columns 16 through 20

   0.491449103161023   0.491281749083432   0.491110638559454   0.490935680401183   0.490756781201384

  Columns 21 through 25

   0.490573845285290   0.490386774661733   0.490195468973683   0.489999825448162   0.489799738845542

  Columns 26 through 30

   0.489595101408318   0.489385802809266   0.489171730099108                   0                   0

  Columns 31 through 35

                   0                   0                   0                   0                   0

  Columns 36 through 40

                   0                   0                   0                   0                   0

  Columns 41 through 45

                   0                   0                   0                   0                   0

  Columns 46 through 50

                   0                   0                   0                   0                   0

  Columns 51 through 55

                   0                   0                   0                   0                   0

  Columns 56 through 60

                   0                   0                   0                   0                   0

  Column 61

                   0


outer_code_BER =

  Columns 1 through 5

   0.493564391990779   0.493443811508778   0.493320606791422   0.493194714619031   0.493066070193132

  Columns 6 through 10

   0.492934607098729   0.492800257265856   0.492662950930428   0.492522616594356   0.492379180984968

  Columns 11 through 15

   0.492232569013686   0.492082703734013   0.491929506298792   0.491772895916752   0.491612789808375

  Columns 16 through 20

   0.491449103161025   0.491281749083432   0.491110638559454   0.490935680401183   0.490756781201385

  Columns 21 through 25

   0.490573845285290   0.490386774661733   0.490195468973685   0.489999825448161   0.489799738845542

  Columns 26 through 30

   0.489595101408318   0.489385802809265   0.489171730099108                   0                   0

  Columns 31 through 35

                   0                   0                   0                   0                   0

  Columns 36 through 40

                   0                   0                   0                   0                   0

  Columns 41 through 45

                   0                   0                   0                   0                   0

  Columns 46 through 50

                   0                   0                   0                   0                   0

  Columns 51 through 55

                   0                   0                   0                   0                   0

  Columns 56 through 60

                   0                   0                   0                   0                   0

  Column 61

                   0


inner_code_BER =

  Columns 1 through 5

   0.493564391990778   0.493443811508779   0.493320606791423   0.493194714619031   0.493066070193132

  Columns 6 through 10

   0.492934607098729   0.492800257265856   0.492662950930429   0.492522616594357   0.492379180984969

  Columns 11 through 15

   0.492232569013685   0.492082703734013   0.491929506298792   0.491772895916751   0.491612789808374

  Columns 16 through 20

   0.491449103161023   0.491281749083432   0.491110638559454   0.490935680401183   0.490756781201384

  Columns 21 through 25

   0.490573845285290   0.490386774661733   0.490195468973683   0.489999825448162   0.489799738845542

  Columns 26 through 30

   0.489595101408318   0.489385802809266   0.489171730099108   0.488952767653642                   0

  Columns 31 through 35

                   0                   0                   0                   0                   0

  Columns 36 through 40

                   0                   0                   0                   0                   0

  Columns 41 through 45

                   0                   0                   0                   0                   0

  Columns 46 through 50

                   0                   0                   0                   0                   0

  Columns 51 through 55

                   0                   0                   0                   0                   0

  Columns 56 through 60

                   0                   0                   0                   0                   0

  Column 61

                   0


outer_code_BER =

  Columns 1 through 5

   0.493564391990779   0.493443811508778   0.493320606791422   0.493194714619031   0.493066070193132

  Columns 6 through 10

   0.492934607098729   0.492800257265856   0.492662950930428   0.492522616594356   0.492379180984968

  Columns 11 through 15

   0.492232569013686   0.492082703734013   0.491929506298792   0.491772895916752   0.491612789808375

  Columns 16 through 20

   0.491449103161025   0.491281749083432   0.491110638559454   0.490935680401183   0.490756781201385

  Columns 21 through 25

   0.490573845285290   0.490386774661733   0.490195468973685   0.489999825448161   0.489799738845542

  Columns 26 through 30

   0.489595101408318   0.489385802809265   0.489171730099108   0.488952767653641                   0

  Columns 31 through 35

                   0                   0                   0                   0                   0

  Columns 36 through 40

                   0                   0                   0                   0                   0

  Columns 41 through 45

                   0                   0                   0                   0                   0

  Columns 46 through 50

                   0                   0                   0                   0                   0

  Columns 51 through 55

                   0                   0                   0                   0                   0

  Columns 56 through 60

                   0                   0                   0                   0                   0

  Column 61

                   0


inner_code_BER =

  Columns 1 through 5

   0.493564391990778   0.493443811508779   0.493320606791423   0.493194714619031   0.493066070193132

  Columns 6 through 10

   0.492934607098729   0.492800257265856   0.492662950930429   0.492522616594357   0.492379180984969

  Columns 11 through 15

   0.492232569013685   0.492082703734013   0.491929506298792   0.491772895916751   0.491612789808374

  Columns 16 through 20

   0.491449103161023   0.491281749083432   0.491110638559454   0.490935680401183   0.490756781201384

  Columns 21 through 25

   0.490573845285290   0.490386774661733   0.490195468973683   0.489999825448162   0.489799738845542

  Columns 26 through 30

   0.489595101408318   0.489385802809266   0.489171730099108   0.488952767653642   0.488728797120358

  Columns 31 through 35

                   0                   0                   0                   0                   0

  Columns 36 through 40

                   0                   0                   0                   0                   0

  Columns 41 through 45

                   0                   0                   0                   0                   0

  Columns 46 through 50

                   0                   0                   0                   0                   0

  Columns 51 through 55

                   0                   0                   0                   0                   0

  Columns 56 through 60

                   0                   0                   0                   0                   0

  Column 61

                   0


outer_code_BER =

  Columns 1 through 5

   0.493564391990779   0.493443811508778   0.493320606791422   0.493194714619031   0.493066070193132

  Columns 6 through 10

   0.492934607098729   0.492800257265856   0.492662950930428   0.492522616594356   0.492379180984968

  Columns 11 through 15

   0.492232569013686   0.492082703734013   0.491929506298792   0.491772895916752   0.491612789808375

  Columns 16 through 20

   0.491449103161025   0.491281749083432   0.491110638559454   0.490935680401183   0.490756781201385

  Columns 21 through 25

   0.490573845285290   0.490386774661733   0.490195468973685   0.489999825448161   0.489799738845542

  Columns 26 through 30

   0.489595101408318   0.489385802809265   0.489171730099108   0.488952767653641   0.488728797120358

  Columns 31 through 35

                   0                   0                   0                   0                   0

  Columns 36 through 40

                   0                   0                   0                   0                   0

  Columns 41 through 45

                   0                   0                   0                   0                   0

  Columns 46 through 50

                   0                   0                   0                   0                   0

  Columns 51 through 55

                   0                   0                   0                   0                   0

  Columns 56 through 60

                   0                   0                   0                   0                   0

  Column 61

                   0


inner_code_BER =

  Columns 1 through 5

   0.493564391990778   0.493443811508779   0.493320606791423   0.493194714619031   0.493066070193132

  Columns 6 through 10

   0.492934607098729   0.492800257265856   0.492662950930429   0.492522616594357   0.492379180984969

  Columns 11 through 15

   0.492232569013685   0.492082703734013   0.491929506298792   0.491772895916751   0.491612789808374

  Columns 16 through 20

   0.491449103161023   0.491281749083432   0.491110638559454   0.490935680401183   0.490756781201384

  Columns 21 through 25

   0.490573845285290   0.490386774661733   0.490195468973683   0.489999825448162   0.489799738845542

  Columns 26 through 30

   0.489595101408318   0.489385802809266   0.489171730099108   0.488952767653642   0.488728797120358

  Columns 31 through 35

   0.488499697364629                   0                   0                   0                   0

  Columns 36 through 40

                   0                   0                   0                   0                   0

  Columns 41 through 45

                   0                   0                   0                   0                   0

  Columns 46 through 50

                   0                   0                   0                   0                   0

  Columns 51 through 55

                   0                   0                   0                   0                   0

  Columns 56 through 60

                   0                   0                   0                   0                   0

  Column 61

                   0


outer_code_BER =

  Columns 1 through 5

   0.493564391990779   0.493443811508778   0.493320606791422   0.493194714619031   0.493066070193132

  Columns 6 through 10

   0.492934607098729   0.492800257265856   0.492662950930428   0.492522616594356   0.492379180984968

  Columns 11 through 15

   0.492232569013686   0.492082703734013   0.491929506298792   0.491772895916752   0.491612789808375

  Columns 16 through 20

   0.491449103161025   0.491281749083432   0.491110638559454   0.490935680401183   0.490756781201385

  Columns 21 through 25

   0.490573845285290   0.490386774661733   0.490195468973685   0.489999825448161   0.489799738845542

  Columns 26 through 30

   0.489595101408318   0.489385802809265   0.489171730099108   0.488952767653641   0.488728797120358

  Columns 31 through 35

   0.488499697364629                   0                   0                   0                   0

  Columns 36 through 40

                   0                   0                   0                   0                   0

  Columns 41 through 45

                   0                   0                   0                   0                   0

  Columns 46 through 50

                   0                   0                   0                   0                   0

  Columns 51 through 55

                   0                   0                   0                   0                   0

  Columns 56 through 60

                   0                   0                   0                   0                   0

  Column 61

                   0


inner_code_BER =

  Columns 1 through 5

   0.493564391990778   0.493443811508779   0.493320606791423   0.493194714619031   0.493066070193132

  Columns 6 through 10

   0.492934607098729   0.492800257265856   0.492662950930429   0.492522616594357   0.492379180984969

  Columns 11 through 15

   0.492232569013685   0.492082703734013   0.491929506298792   0.491772895916751   0.491612789808374

  Columns 16 through 20

   0.491449103161023   0.491281749083432   0.491110638559454   0.490935680401183   0.490756781201384

  Columns 21 through 25

   0.490573845285290   0.490386774661733   0.490195468973683   0.489999825448162   0.489799738845542

  Columns 26 through 30

   0.489595101408318   0.489385802809266   0.489171730099108   0.488952767653642   0.488728797120358

  Columns 31 through 35

   0.488499697364629   0.488265344415393                   0                   0                   0

  Columns 36 through 40

                   0                   0                   0                   0                   0

  Columns 41 through 45

                   0                   0                   0                   0                   0

  Columns 46 through 50

                   0                   0                   0                   0                   0

  Columns 51 through 55

                   0                   0                   0                   0                   0

  Columns 56 through 60

                   0                   0                   0                   0                   0

  Column 61

                   0


outer_code_BER =

  Columns 1 through 5

   0.493564391990779   0.493443811508778   0.493320606791422   0.493194714619031   0.493066070193132

  Columns 6 through 10

   0.492934607098729   0.492800257265856   0.492662950930428   0.492522616594356   0.492379180984968

  Columns 11 through 15

   0.492232569013686   0.492082703734013   0.491929506298792   0.491772895916752   0.491612789808375

  Columns 16 through 20

   0.491449103161025   0.491281749083432   0.491110638559454   0.490935680401183   0.490756781201385

  Columns 21 through 25

   0.490573845285290   0.490386774661733   0.490195468973685   0.489999825448161   0.489799738845542

  Columns 26 through 30

   0.489595101408318   0.489385802809265   0.489171730099108   0.488952767653641   0.488728797120358

  Columns 31 through 35

   0.488499697364629   0.488265344415394                   0                   0                   0

  Columns 36 through 40

                   0                   0                   0                   0                   0

  Columns 41 through 45

                   0                   0                   0                   0                   0

  Columns 46 through 50

                   0                   0                   0                   0                   0

  Columns 51 through 55

                   0                   0                   0                   0                   0

  Columns 56 through 60

                   0                   0                   0                   0                   0

  Column 61

                   0


inner_code_BER =

  Columns 1 through 5

   0.493564391990778   0.493443811508779   0.493320606791423   0.493194714619031   0.493066070193132

  Columns 6 through 10

   0.492934607098729   0.492800257265856   0.492662950930429   0.492522616594357   0.492379180984969

  Columns 11 through 15

   0.492232569013685   0.492082703734013   0.491929506298792   0.491772895916751   0.491612789808374

  Columns 16 through 20

   0.491449103161023   0.491281749083432   0.491110638559454   0.490935680401183   0.490756781201384

  Columns 21 through 25

   0.490573845285290   0.490386774661733   0.490195468973683   0.489999825448162   0.489799738845542

  Columns 26 through 30

   0.489595101408318   0.489385802809266   0.489171730099108   0.488952767653642   0.488728797120358

  Columns 31 through 35

   0.488499697364629   0.488265344415393   0.488025611410453                   0                   0

  Columns 36 through 40

                   0                   0                   0                   0                   0

  Columns 41 through 45

                   0                   0                   0                   0                   0

  Columns 46 through 50

                   0                   0                   0                   0                   0

  Columns 51 through 55

                   0                   0                   0                   0                   0

  Columns 56 through 60

                   0                   0                   0                   0                   0

  Column 61

                   0


outer_code_BER =

  Columns 1 through 5

   0.493564391990779   0.493443811508778   0.493320606791422   0.493194714619031   0.493066070193132

  Columns 6 through 10

   0.492934607098729   0.492800257265856   0.492662950930428   0.492522616594356   0.492379180984968

  Columns 11 through 15

   0.492232569013686   0.492082703734013   0.491929506298792   0.491772895916752   0.491612789808375

  Columns 16 through 20

   0.491449103161025   0.491281749083432   0.491110638559454   0.490935680401183   0.490756781201385

  Columns 21 through 25

   0.490573845285290   0.490386774661733   0.490195468973685   0.489999825448161   0.489799738845542

  Columns 26 through 30

   0.489595101408318   0.489385802809265   0.489171730099108   0.488952767653641   0.488728797120358

  Columns 31 through 35

   0.488499697364629   0.488265344415394   0.488025611410454                   0                   0

  Columns 36 through 40

                   0                   0                   0                   0                   0

  Columns 41 through 45

                   0                   0                   0                   0                   0

  Columns 46 through 50

                   0                   0                   0                   0                   0

  Columns 51 through 55

                   0                   0                   0                   0                   0

  Columns 56 through 60

                   0                   0                   0                   0                   0

  Column 61

                   0


inner_code_BER =

  Columns 1 through 5

   0.493564391990778   0.493443811508779   0.493320606791423   0.493194714619031   0.493066070193132

  Columns 6 through 10

   0.492934607098729   0.492800257265856   0.492662950930429   0.492522616594357   0.492379180984969

  Columns 11 through 15

   0.492232569013685   0.492082703734013   0.491929506298792   0.491772895916751   0.491612789808374

  Columns 16 through 20

   0.491449103161023   0.491281749083432   0.491110638559454   0.490935680401183   0.490756781201384

  Columns 21 through 25

   0.490573845285290   0.490386774661733   0.490195468973683   0.489999825448162   0.489799738845542

  Columns 26 through 30

   0.489595101408318   0.489385802809266   0.489171730099108   0.488952767653642   0.488728797120358

  Columns 31 through 35

   0.488499697364629   0.488265344415393   0.488025611410453   0.487780368541361                   0

  Columns 36 through 40

                   0                   0                   0                   0                   0

  Columns 41 through 45

                   0                   0                   0                   0                   0

  Columns 46 through 50

                   0                   0                   0                   0                   0

  Columns 51 through 55

                   0                   0                   0                   0                   0

  Columns 56 through 60

                   0                   0                   0                   0                   0

  Column 61

                   0


outer_code_BER =

  Columns 1 through 5

   0.493564391990779   0.493443811508778   0.493320606791422   0.493194714619031   0.493066070193132

  Columns 6 through 10

   0.492934607098729   0.492800257265856   0.492662950930428   0.492522616594356   0.492379180984968

  Columns 11 through 15

   0.492232569013686   0.492082703734013   0.491929506298792   0.491772895916752   0.491612789808375

  Columns 16 through 20

   0.491449103161025   0.491281749083432   0.491110638559454   0.490935680401183   0.490756781201385

  Columns 21 through 25

   0.490573845285290   0.490386774661733   0.490195468973685   0.489999825448161   0.489799738845542

  Columns 26 through 30

   0.489595101408318   0.489385802809265   0.489171730099108   0.488952767653641   0.488728797120358

  Columns 31 through 35

   0.488499697364629   0.488265344415394   0.488025611410454   0.487780368541361                   0

  Columns 36 through 40

                   0                   0                   0                   0                   0

  Columns 41 through 45

                   0                   0                   0                   0                   0

  Columns 46 through 50

                   0                   0                   0                   0                   0

  Columns 51 through 55

                   0                   0                   0                   0                   0

  Columns 56 through 60

                   0                   0                   0                   0                   0

  Column 61

                   0


inner_code_BER =

  Columns 1 through 5

   0.493564391990778   0.493443811508779   0.493320606791423   0.493194714619031   0.493066070193132

  Columns 6 through 10

   0.492934607098729   0.492800257265856   0.492662950930429   0.492522616594357   0.492379180984969

  Columns 11 through 15

   0.492232569013685   0.492082703734013   0.491929506298792   0.491772895916751   0.491612789808374

  Columns 16 through 20

   0.491449103161023   0.491281749083432   0.491110638559454   0.490935680401183   0.490756781201384

  Columns 21 through 25

   0.490573845285290   0.490386774661733   0.490195468973683   0.489999825448162   0.489799738845542

  Columns 26 through 30

   0.489595101408318   0.489385802809266   0.489171730099108   0.488952767653642   0.488728797120358

  Columns 31 through 35

   0.488499697364629   0.488265344415393   0.488025611410453   0.487780368541361   0.487529482997913

  Columns 36 through 40

                   0                   0                   0                   0                   0

  Columns 41 through 45

                   0                   0                   0                   0                   0

  Columns 46 through 50

                   0                   0                   0                   0                   0

  Columns 51 through 55

                   0                   0                   0                   0                   0

  Columns 56 through 60

                   0                   0                   0                   0                   0

  Column 61

                   0


outer_code_BER =

  Columns 1 through 5

   0.493564391990779   0.493443811508778   0.493320606791422   0.493194714619031   0.493066070193132

  Columns 6 through 10

   0.492934607098729   0.492800257265856   0.492662950930428   0.492522616594356   0.492379180984968

  Columns 11 through 15

   0.492232569013686   0.492082703734013   0.491929506298792   0.491772895916752   0.491612789808375

  Columns 16 through 20

   0.491449103161025   0.491281749083432   0.491110638559454   0.490935680401183   0.490756781201385

  Columns 21 through 25

   0.490573845285290   0.490386774661733   0.490195468973685   0.489999825448161   0.489799738845542

  Columns 26 through 30

   0.489595101408318   0.489385802809265   0.489171730099108   0.488952767653641   0.488728797120358

  Columns 31 through 35

   0.488499697364629   0.488265344415394   0.488025611410454   0.487780368541361   0.487529482997913

  Columns 36 through 40

                   0                   0                   0                   0                   0

  Columns 41 through 45

                   0                   0                   0                   0                   0

  Columns 46 through 50

                   0                   0                   0                   0                   0

  Columns 51 through 55

                   0                   0                   0                   0                   0

  Columns 56 through 60

                   0                   0                   0                   0                   0

  Column 61

                   0


inner_code_BER =

  Columns 1 through 5

   0.493564391990778   0.493443811508779   0.493320606791423   0.493194714619031   0.493066070193132

  Columns 6 through 10

   0.492934607098729   0.492800257265856   0.492662950930429   0.492522616594357   0.492379180984969

  Columns 11 through 15

   0.492232569013685   0.492082703734013   0.491929506298792   0.491772895916751   0.491612789808374

  Columns 16 through 20

   0.491449103161023   0.491281749083432   0.491110638559454   0.490935680401183   0.490756781201384

  Columns 21 through 25

   0.490573845285290   0.490386774661733   0.490195468973683   0.489999825448162   0.489799738845542

  Columns 26 through 30

   0.489595101408318   0.489385802809266   0.489171730099108   0.488952767653642   0.488728797120358

  Columns 31 through 35

   0.488499697364629   0.488265344415393   0.488025611410453   0.487780368541361   0.487529482997913

  Columns 36 through 40

   0.487272818912314                   0                   0                   0                   0

  Columns 41 through 45

                   0                   0                   0                   0                   0

  Columns 46 through 50

                   0                   0                   0                   0                   0

  Columns 51 through 55

                   0                   0                   0                   0                   0

  Columns 56 through 60

                   0                   0                   0                   0                   0

  Column 61

                   0


outer_code_BER =

  Columns 1 through 5

   0.493564391990779   0.493443811508778   0.493320606791422   0.493194714619031   0.493066070193132

  Columns 6 through 10

   0.492934607098729   0.492800257265856   0.492662950930428   0.492522616594356   0.492379180984968

  Columns 11 through 15

   0.492232569013686   0.492082703734013   0.491929506298792   0.491772895916752   0.491612789808375

  Columns 16 through 20

   0.491449103161025   0.491281749083432   0.491110638559454   0.490935680401183   0.490756781201385

  Columns 21 through 25

   0.490573845285290   0.490386774661733   0.490195468973685   0.489999825448161   0.489799738845542

  Columns 26 through 30

   0.489595101408318   0.489385802809265   0.489171730099108   0.488952767653641   0.488728797120358

  Columns 31 through 35

   0.488499697364629   0.488265344415394   0.488025611410454   0.487780368541361   0.487529482997913

  Columns 36 through 40

   0.487272818912314                   0                   0                   0                   0

  Columns 41 through 45

                   0                   0                   0                   0                   0

  Columns 46 through 50

                   0                   0                   0                   0                   0

  Columns 51 through 55

                   0                   0                   0                   0                   0

  Columns 56 through 60

                   0                   0                   0                   0                   0

  Column 61

                   0


inner_code_BER =

  Columns 1 through 5

   0.493564391990778   0.493443811508779   0.493320606791423   0.493194714619031   0.493066070193132

  Columns 6 through 10

   0.492934607098729   0.492800257265856   0.492662950930429   0.492522616594357   0.492379180984969

  Columns 11 through 15

   0.492232569013685   0.492082703734013   0.491929506298792   0.491772895916751   0.491612789808374

  Columns 16 through 20

   0.491449103161023   0.491281749083432   0.491110638559454   0.490935680401183   0.490756781201384

  Columns 21 through 25

   0.490573845285290   0.490386774661733   0.490195468973683   0.489999825448162   0.489799738845542

  Columns 26 through 30

   0.489595101408318   0.489385802809266   0.489171730099108   0.488952767653642   0.488728797120358

  Columns 31 through 35

   0.488499697364629   0.488265344415393   0.488025611410453   0.487780368541361   0.487529482997913

  Columns 36 through 40

   0.487272818912314   0.487010237302997                   0                   0                   0

  Columns 41 through 45

                   0                   0                   0                   0                   0

  Columns 46 through 50

                   0                   0                   0                   0                   0

  Columns 51 through 55

                   0                   0                   0                   0                   0

  Columns 56 through 60

                   0                   0                   0                   0                   0

  Column 61

                   0


outer_code_BER =

  Columns 1 through 5

   0.493564391990779   0.493443811508778   0.493320606791422   0.493194714619031   0.493066070193132

  Columns 6 through 10

   0.492934607098729   0.492800257265856   0.492662950930428   0.492522616594356   0.492379180984968

  Columns 11 through 15

   0.492232569013686   0.492082703734013   0.491929506298792   0.491772895916752   0.491612789808375

  Columns 16 through 20

   0.491449103161025   0.491281749083432   0.491110638559454   0.490935680401183   0.490756781201385

  Columns 21 through 25

   0.490573845285290   0.490386774661733   0.490195468973685   0.489999825448161   0.489799738845542

  Columns 26 through 30

   0.489595101408318   0.489385802809265   0.489171730099108   0.488952767653641   0.488728797120358

  Columns 31 through 35

   0.488499697364629   0.488265344415394   0.488025611410454   0.487780368541361   0.487529482997913

  Columns 36 through 40

   0.487272818912314   0.487010237302997                   0                   0                   0

  Columns 41 through 45

                   0                   0                   0                   0                   0

  Columns 46 through 50

                   0                   0                   0                   0                   0

  Columns 51 through 55

                   0                   0                   0                   0                   0

  Columns 56 through 60

                   0                   0                   0                   0                   0

  Column 61

                   0


inner_code_BER =

  Columns 1 through 5

   0.493564391990778   0.493443811508779   0.493320606791423   0.493194714619031   0.493066070193132

  Columns 6 through 10

   0.492934607098729   0.492800257265856   0.492662950930429   0.492522616594357   0.492379180984969

  Columns 11 through 15

   0.492232569013685   0.492082703734013   0.491929506298792   0.491772895916751   0.491612789808374

  Columns 16 through 20

   0.491449103161023   0.491281749083432   0.491110638559454   0.490935680401183   0.490756781201384

  Columns 21 through 25

   0.490573845285290   0.490386774661733   0.490195468973683   0.489999825448162   0.489799738845542

  Columns 26 through 30

   0.489595101408318   0.489385802809266   0.489171730099108   0.488952767653642   0.488728797120358

  Columns 31 through 35

   0.488499697364629   0.488265344415393   0.488025611410453   0.487780368541361   0.487529482997913

  Columns 36 through 40

   0.487272818912314   0.487010237302997   0.486741596018158                   0                   0

  Columns 41 through 45

                   0                   0                   0                   0                   0

  Columns 46 through 50

                   0                   0                   0                   0                   0

  Columns 51 through 55

                   0                   0                   0                   0                   0

  Columns 56 through 60

                   0                   0                   0                   0                   0

  Column 61

                   0


outer_code_BER =

  Columns 1 through 5

   0.493564391990779   0.493443811508778   0.493320606791422   0.493194714619031   0.493066070193132

  Columns 6 through 10

   0.492934607098729   0.492800257265856   0.492662950930428   0.492522616594356   0.492379180984968

  Columns 11 through 15

   0.492232569013686   0.492082703734013   0.491929506298792   0.491772895916752   0.491612789808375

  Columns 16 through 20

   0.491449103161025   0.491281749083432   0.491110638559454   0.490935680401183   0.490756781201385

  Columns 21 through 25

   0.490573845285290   0.490386774661733   0.490195468973685   0.489999825448161   0.489799738845542

  Columns 26 through 30

   0.489595101408318   0.489385802809265   0.489171730099108   0.488952767653641   0.488728797120358

  Columns 31 through 35

   0.488499697364629   0.488265344415394   0.488025611410454   0.487780368541361   0.487529482997913

  Columns 36 through 40

   0.487272818912314   0.487010237302997   0.486741596018158                   0                   0

  Columns 41 through 45

                   0                   0                   0                   0                   0

  Columns 46 through 50

                   0                   0                   0                   0                   0

  Columns 51 through 55

                   0                   0                   0                   0                   0

  Columns 56 through 60

                   0                   0                   0                   0                   0

  Column 61

                   0


inner_code_BER =

  Columns 1 through 5

   0.493564391990778   0.493443811508779   0.493320606791423   0.493194714619031   0.493066070193132

  Columns 6 through 10

   0.492934607098729   0.492800257265856   0.492662950930429   0.492522616594357   0.492379180984969

  Columns 11 through 15

   0.492232569013685   0.492082703734013   0.491929506298792   0.491772895916751   0.491612789808374

  Columns 16 through 20

   0.491449103161023   0.491281749083432   0.491110638559454   0.490935680401183   0.490756781201384

  Columns 21 through 25

   0.490573845285290   0.490386774661733   0.490195468973683   0.489999825448162   0.489799738845542

  Columns 26 through 30

   0.489595101408318   0.489385802809266   0.489171730099108   0.488952767653642   0.488728797120358

  Columns 31 through 35

   0.488499697364629   0.488265344415393   0.488025611410453   0.487780368541361   0.487529482997913

  Columns 36 through 40

   0.487272818912314   0.487010237302997   0.486741596018158   0.486466749678986                   0

  Columns 41 through 45

                   0                   0                   0                   0                   0

  Columns 46 through 50

                   0                   0                   0                   0                   0

  Columns 51 through 55

                   0                   0                   0                   0                   0

  Columns 56 through 60

                   0                   0                   0                   0                   0

  Column 61

                   0


outer_code_BER =

  Columns 1 through 5

   0.493564391990779   0.493443811508778   0.493320606791422   0.493194714619031   0.493066070193132

  Columns 6 through 10

   0.492934607098729   0.492800257265856   0.492662950930428   0.492522616594356   0.492379180984968

  Columns 11 through 15

   0.492232569013686   0.492082703734013   0.491929506298792   0.491772895916752   0.491612789808375

  Columns 16 through 20

   0.491449103161025   0.491281749083432   0.491110638559454   0.490935680401183   0.490756781201385

  Columns 21 through 25

   0.490573845285290   0.490386774661733   0.490195468973685   0.489999825448161   0.489799738845542

  Columns 26 through 30

   0.489595101408318   0.489385802809265   0.489171730099108   0.488952767653641   0.488728797120358

  Columns 31 through 35

   0.488499697364629   0.488265344415394   0.488025611410454   0.487780368541361   0.487529482997913

  Columns 36 through 40

   0.487272818912314   0.487010237302997   0.486741596018158   0.486466749678986                   0

  Columns 41 through 45

                   0                   0                   0                   0                   0

  Columns 46 through 50

                   0                   0                   0                   0                   0

  Columns 51 through 55

                   0                   0                   0                   0                   0

  Columns 56 through 60

                   0                   0                   0                   0                   0

  Column 61

                   0


inner_code_BER =

  Columns 1 through 5

   0.493564391990778   0.493443811508779   0.493320606791423   0.493194714619031   0.493066070193132

  Columns 6 through 10

   0.492934607098729   0.492800257265856   0.492662950930429   0.492522616594357   0.492379180984969

  Columns 11 through 15

   0.492232569013685   0.492082703734013   0.491929506298792   0.491772895916751   0.491612789808374

  Columns 16 through 20

   0.491449103161023   0.491281749083432   0.491110638559454   0.490935680401183   0.490756781201384

  Columns 21 through 25

   0.490573845285290   0.490386774661733   0.490195468973683   0.489999825448162   0.489799738845542

  Columns 26 through 30

   0.489595101408318   0.489385802809266   0.489171730099108   0.488952767653642   0.488728797120358

  Columns 31 through 35

   0.488499697364629   0.488265344415393   0.488025611410453   0.487780368541361   0.487529482997913

  Columns 36 through 40

   0.487272818912314   0.487010237302997   0.486741596018158   0.486466749678986   0.486185549622694

  Columns 41 through 45

                   0                   0                   0                   0                   0

  Columns 46 through 50

                   0                   0                   0                   0                   0

  Columns 51 through 55

                   0                   0                   0                   0                   0

  Columns 56 through 60

                   0                   0                   0                   0                   0

  Column 61

                   0


outer_code_BER =

  Columns 1 through 5

   0.493564391990779   0.493443811508778   0.493320606791422   0.493194714619031   0.493066070193132

  Columns 6 through 10

   0.492934607098729   0.492800257265856   0.492662950930428   0.492522616594356   0.492379180984968

  Columns 11 through 15

   0.492232569013686   0.492082703734013   0.491929506298792   0.491772895916752   0.491612789808375

  Columns 16 through 20

   0.491449103161025   0.491281749083432   0.491110638559454   0.490935680401183   0.490756781201385

  Columns 21 through 25

   0.490573845285290   0.490386774661733   0.490195468973685   0.489999825448161   0.489799738845542

  Columns 26 through 30

   0.489595101408318   0.489385802809265   0.489171730099108   0.488952767653641   0.488728797120358

  Columns 31 through 35

   0.488499697364629   0.488265344415394   0.488025611410454   0.487780368541361   0.487529482997913

  Columns 36 through 40

   0.487272818912314   0.487010237302997   0.486741596018158   0.486466749678986   0.486185549622694

  Columns 41 through 45

                   0                   0                   0                   0                   0

  Columns 46 through 50

                   0                   0                   0                   0                   0

  Columns 51 through 55

                   0                   0                   0                   0                   0

  Columns 56 through 60

                   0                   0                   0                   0                   0

  Column 61

                   0


inner_code_BER =

  Columns 1 through 5

   0.493564391990778   0.493443811508779   0.493320606791423   0.493194714619031   0.493066070193132

  Columns 6 through 10

   0.492934607098729   0.492800257265856   0.492662950930429   0.492522616594357   0.492379180984969

  Columns 11 through 15

   0.492232569013685   0.492082703734013   0.491929506298792   0.491772895916751   0.491612789808374

  Columns 16 through 20

   0.491449103161023   0.491281749083432   0.491110638559454   0.490935680401183   0.490756781201384

  Columns 21 through 25

   0.490573845285290   0.490386774661733   0.490195468973683   0.489999825448162   0.489799738845542

  Columns 26 through 30

   0.489595101408318   0.489385802809266   0.489171730099108   0.488952767653642   0.488728797120358

  Columns 31 through 35

   0.488499697364629   0.488265344415393   0.488025611410453   0.487780368541361   0.487529482997913

  Columns 36 through 40

   0.487272818912314   0.487010237302997   0.486741596018158   0.486466749678986   0.486185549622694

  Columns 41 through 45

   0.485897843845247                   0                   0                   0                   0

  Columns 46 through 50

                   0                   0                   0                   0                   0

  Columns 51 through 55

                   0                   0                   0                   0                   0

  Columns 56 through 60

                   0                   0                   0                   0                   0

  Column 61

                   0


outer_code_BER =

  Columns 1 through 5

   0.493564391990779   0.493443811508778   0.493320606791422   0.493194714619031   0.493066070193132

  Columns 6 through 10

   0.492934607098729   0.492800257265856   0.492662950930428   0.492522616594356   0.492379180984968

  Columns 11 through 15

   0.492232569013686   0.492082703734013   0.491929506298792   0.491772895916752   0.491612789808375

  Columns 16 through 20

   0.491449103161025   0.491281749083432   0.491110638559454   0.490935680401183   0.490756781201385

  Columns 21 through 25

   0.490573845285290   0.490386774661733   0.490195468973685   0.489999825448161   0.489799738845542

  Columns 26 through 30

   0.489595101408318   0.489385802809265   0.489171730099108   0.488952767653641   0.488728797120358

  Columns 31 through 35

   0.488499697364629   0.488265344415394   0.488025611410454   0.487780368541361   0.487529482997913

  Columns 36 through 40

   0.487272818912314   0.487010237302997   0.486741596018158   0.486466749678986   0.486185549622694

  Columns 41 through 45

   0.485897843845249                   0                   0                   0                   0

  Columns 46 through 50

                   0                   0                   0                   0                   0

  Columns 51 through 55

                   0                   0                   0                   0                   0

  Columns 56 through 60

                   0                   0                   0                   0                   0

  Column 61

                   0


inner_code_BER =

  Columns 1 through 5

   0.493564391990778   0.493443811508779   0.493320606791423   0.493194714619031   0.493066070193132

  Columns 6 through 10

   0.492934607098729   0.492800257265856   0.492662950930429   0.492522616594357   0.492379180984969

  Columns 11 through 15

   0.492232569013685   0.492082703734013   0.491929506298792   0.491772895916751   0.491612789808374

  Columns 16 through 20

   0.491449103161023   0.491281749083432   0.491110638559454   0.490935680401183   0.490756781201384

  Columns 21 through 25

   0.490573845285290   0.490386774661733   0.490195468973683   0.489999825448162   0.489799738845542

  Columns 26 through 30

   0.489595101408318   0.489385802809266   0.489171730099108   0.488952767653642   0.488728797120358

  Columns 31 through 35

   0.488499697364629   0.488265344415393   0.488025611410453   0.487780368541361   0.487529482997913

  Columns 36 through 40

   0.487272818912314   0.487010237302997   0.486741596018158   0.486466749678986   0.486185549622694

  Columns 41 through 45

   0.485897843845247   0.485603476943984                   0                   0                   0

  Columns 46 through 50

                   0                   0                   0                   0                   0

  Columns 51 through 55

                   0                   0                   0                   0                   0

  Columns 56 through 60

                   0                   0                   0                   0                   0

  Column 61

                   0


outer_code_BER =

  Columns 1 through 5

   0.493564391990779   0.493443811508778   0.493320606791422   0.493194714619031   0.493066070193132

  Columns 6 through 10

   0.492934607098729   0.492800257265856   0.492662950930428   0.492522616594356   0.492379180984968

  Columns 11 through 15

   0.492232569013686   0.492082703734013   0.491929506298792   0.491772895916752   0.491612789808375

  Columns 16 through 20

   0.491449103161025   0.491281749083432   0.491110638559454   0.490935680401183   0.490756781201385

  Columns 21 through 25

   0.490573845285290   0.490386774661733   0.490195468973685   0.489999825448161   0.489799738845542

  Columns 26 through 30

   0.489595101408318   0.489385802809265   0.489171730099108   0.488952767653641   0.488728797120358

  Columns 31 through 35

   0.488499697364629   0.488265344415394   0.488025611410454   0.487780368541361   0.487529482997913

  Columns 36 through 40

   0.487272818912314   0.487010237302997   0.486741596018158   0.486466749678986   0.486185549622694

  Columns 41 through 45

   0.485897843845249   0.485603476943984                   0                   0                   0

  Columns 46 through 50

                   0                   0                   0                   0                   0

  Columns 51 through 55

                   0                   0                   0                   0                   0

  Columns 56 through 60

                   0                   0                   0                   0                   0

  Column 61

                   0


inner_code_BER =

  Columns 1 through 5

   0.493564391990778   0.493443811508779   0.493320606791423   0.493194714619031   0.493066070193132

  Columns 6 through 10

   0.492934607098729   0.492800257265856   0.492662950930429   0.492522616594357   0.492379180984969

  Columns 11 through 15

   0.492232569013685   0.492082703734013   0.491929506298792   0.491772895916751   0.491612789808374

  Columns 16 through 20

   0.491449103161023   0.491281749083432   0.491110638559454   0.490935680401183   0.490756781201384

  Columns 21 through 25

   0.490573845285290   0.490386774661733   0.490195468973683   0.489999825448162   0.489799738845542

  Columns 26 through 30

   0.489595101408318   0.489385802809266   0.489171730099108   0.488952767653642   0.488728797120358

  Columns 31 through 35

   0.488499697364629   0.488265344415393   0.488025611410453   0.487780368541361   0.487529482997913

  Columns 36 through 40

   0.487272818912314   0.487010237302997   0.486741596018158   0.486466749678986   0.486185549622694

  Columns 41 through 45

   0.485897843845247   0.485603476943984   0.485302290059942                   0                   0

  Columns 46 through 50

                   0                   0                   0                   0                   0

  Columns 51 through 55

                   0                   0                   0                   0                   0

  Columns 56 through 60

                   0                   0                   0                   0                   0

  Column 61

                   0


outer_code_BER =

  Columns 1 through 5

   0.493564391990779   0.493443811508778   0.493320606791422   0.493194714619031   0.493066070193132

  Columns 6 through 10

   0.492934607098729   0.492800257265856   0.492662950930428   0.492522616594356   0.492379180984968

  Columns 11 through 15

   0.492232569013686   0.492082703734013   0.491929506298792   0.491772895916752   0.491612789808375

  Columns 16 through 20

   0.491449103161025   0.491281749083432   0.491110638559454   0.490935680401183   0.490756781201385

  Columns 21 through 25

   0.490573845285290   0.490386774661733   0.490195468973685   0.489999825448161   0.489799738845542

  Columns 26 through 30

   0.489595101408318   0.489385802809265   0.489171730099108   0.488952767653641   0.488728797120358

  Columns 31 through 35

   0.488499697364629   0.488265344415394   0.488025611410454   0.487780368541361   0.487529482997913

  Columns 36 through 40

   0.487272818912314   0.487010237302997   0.486741596018158   0.486466749678986   0.486185549622694

  Columns 41 through 45

   0.485897843845249   0.485603476943984   0.485302290059943                   0                   0

  Columns 46 through 50

                   0                   0                   0                   0                   0

  Columns 51 through 55

                   0                   0                   0                   0                   0

  Columns 56 through 60

                   0                   0                   0                   0                   0

  Column 61

                   0


inner_code_BER =

  Columns 1 through 5

   0.493564391990778   0.493443811508779   0.493320606791423   0.493194714619031   0.493066070193132

  Columns 6 through 10

   0.492934607098729   0.492800257265856   0.492662950930429   0.492522616594357   0.492379180984969

  Columns 11 through 15

   0.492232569013685   0.492082703734013   0.491929506298792   0.491772895916751   0.491612789808374

  Columns 16 through 20

   0.491449103161023   0.491281749083432   0.491110638559454   0.490935680401183   0.490756781201384

  Columns 21 through 25

   0.490573845285290   0.490386774661733   0.490195468973683   0.489999825448162   0.489799738845542

  Columns 26 through 30

   0.489595101408318   0.489385802809266   0.489171730099108   0.488952767653642   0.488728797120358

  Columns 31 through 35

   0.488499697364629   0.488265344415393   0.488025611410453   0.487780368541361   0.487529482997913

  Columns 36 through 40

   0.487272818912314   0.487010237302997   0.486741596018158   0.486466749678986   0.486185549622694

  Columns 41 through 45

   0.485897843845247   0.485603476943984   0.485302290059942   0.484994120820147                   0

  Columns 46 through 50

                   0                   0                   0                   0                   0

  Columns 51 through 55

                   0                   0                   0                   0                   0

  Columns 56 through 60

                   0                   0                   0                   0                   0

  Column 61

                   0


outer_code_BER =

  Columns 1 through 5

   0.493564391990779   0.493443811508778   0.493320606791422   0.493194714619031   0.493066070193132

  Columns 6 through 10

   0.492934607098729   0.492800257265856   0.492662950930428   0.492522616594356   0.492379180984968

  Columns 11 through 15

   0.492232569013686   0.492082703734013   0.491929506298792   0.491772895916752   0.491612789808375

  Columns 16 through 20

   0.491449103161025   0.491281749083432   0.491110638559454   0.490935680401183   0.490756781201385

  Columns 21 through 25

   0.490573845285290   0.490386774661733   0.490195468973685   0.489999825448161   0.489799738845542

  Columns 26 through 30

   0.489595101408318   0.489385802809265   0.489171730099108   0.488952767653641   0.488728797120358

  Columns 31 through 35

   0.488499697364629   0.488265344415394   0.488025611410454   0.487780368541361   0.487529482997913

  Columns 36 through 40

   0.487272818912314   0.487010237302997   0.486741596018158   0.486466749678986   0.486185549622694

  Columns 41 through 45

   0.485897843845249   0.485603476943984   0.485302290059943   0.484994120820149                   0

  Columns 46 through 50

                   0                   0                   0                   0                   0

  Columns 51 through 55

                   0                   0                   0                   0                   0

  Columns 56 through 60

                   0                   0                   0                   0                   0

  Column 61

                   0


inner_code_BER =

  Columns 1 through 5

   0.493564391990778   0.493443811508779   0.493320606791423   0.493194714619031   0.493066070193132

  Columns 6 through 10

   0.492934607098729   0.492800257265856   0.492662950930429   0.492522616594357   0.492379180984969

  Columns 11 through 15

   0.492232569013685   0.492082703734013   0.491929506298792   0.491772895916751   0.491612789808374

  Columns 16 through 20

   0.491449103161023   0.491281749083432   0.491110638559454   0.490935680401183   0.490756781201384

  Columns 21 through 25

   0.490573845285290   0.490386774661733   0.490195468973683   0.489999825448162   0.489799738845542

  Columns 26 through 30

   0.489595101408318   0.489385802809266   0.489171730099108   0.488952767653642   0.488728797120358

  Columns 31 through 35

   0.488499697364629   0.488265344415393   0.488025611410453   0.487780368541361   0.487529482997913

  Columns 36 through 40

   0.487272818912314   0.487010237302997   0.486741596018158   0.486466749678986   0.486185549622694

  Columns 41 through 45

   0.485897843845247   0.485603476943984   0.485302290059942   0.484994120820147   0.484678803279677

  Columns 46 through 50

                   0                   0                   0                   0                   0

  Columns 51 through 55

                   0                   0                   0                   0                   0

  Columns 56 through 60

                   0                   0                   0                   0                   0

  Column 61

                   0


outer_code_BER =

  Columns 1 through 5

   0.493564391990779   0.493443811508778   0.493320606791422   0.493194714619031   0.493066070193132

  Columns 6 through 10

   0.492934607098729   0.492800257265856   0.492662950930428   0.492522616594356   0.492379180984968

  Columns 11 through 15

   0.492232569013686   0.492082703734013   0.491929506298792   0.491772895916752   0.491612789808375

  Columns 16 through 20

   0.491449103161025   0.491281749083432   0.491110638559454   0.490935680401183   0.490756781201385

  Columns 21 through 25

   0.490573845285290   0.490386774661733   0.490195468973685   0.489999825448161   0.489799738845542

  Columns 26 through 30

   0.489595101408318   0.489385802809265   0.489171730099108   0.488952767653641   0.488728797120358

  Columns 31 through 35

   0.488499697364629   0.488265344415394   0.488025611410454   0.487780368541361   0.487529482997913

  Columns 36 through 40

   0.487272818912314   0.487010237302997   0.486741596018158   0.486466749678986   0.486185549622694

  Columns 41 through 45

   0.485897843845249   0.485603476943984   0.485302290059943   0.484994120820149   0.484678803279678

  Columns 46 through 50

                   0                   0                   0                   0                   0

  Columns 51 through 55

                   0                   0                   0                   0                   0

  Columns 56 through 60

                   0                   0                   0                   0                   0

  Column 61

                   0


inner_code_BER =

  Columns 1 through 5

   0.493564391990778   0.493443811508779   0.493320606791423   0.493194714619031   0.493066070193132

  Columns 6 through 10

   0.492934607098729   0.492800257265856   0.492662950930429   0.492522616594357   0.492379180984969

  Columns 11 through 15

   0.492232569013685   0.492082703734013   0.491929506298792   0.491772895916751   0.491612789808374

  Columns 16 through 20

   0.491449103161023   0.491281749083432   0.491110638559454   0.490935680401183   0.490756781201384

  Columns 21 through 25

   0.490573845285290   0.490386774661733   0.490195468973683   0.489999825448162   0.489799738845542

  Columns 26 through 30

   0.489595101408318   0.489385802809266   0.489171730099108   0.488952767653642   0.488728797120358

  Columns 31 through 35

   0.488499697364629   0.488265344415393   0.488025611410453   0.487780368541361   0.487529482997913

  Columns 36 through 40

   0.487272818912314   0.487010237302997   0.486741596018158   0.486466749678986   0.486185549622694

  Columns 41 through 45

   0.485897843845247   0.485603476943984   0.485302290059942   0.484994120820147   0.484678803279677

  Columns 46 through 50

   0.484356167863639                   0                   0                   0                   0

  Columns 51 through 55

                   0                   0                   0                   0                   0

  Columns 56 through 60

                   0                   0                   0                   0                   0

  Column 61

                   0


outer_code_BER =

  Columns 1 through 5

   0.493564391990779   0.493443811508778   0.493320606791422   0.493194714619031   0.493066070193132

  Columns 6 through 10

   0.492934607098729   0.492800257265856   0.492662950930428   0.492522616594356   0.492379180984968

  Columns 11 through 15

   0.492232569013686   0.492082703734013   0.491929506298792   0.491772895916752   0.491612789808375

  Columns 16 through 20

   0.491449103161025   0.491281749083432   0.491110638559454   0.490935680401183   0.490756781201385

  Columns 21 through 25

   0.490573845285290   0.490386774661733   0.490195468973685   0.489999825448161   0.489799738845542

  Columns 26 through 30

   0.489595101408318   0.489385802809265   0.489171730099108   0.488952767653641   0.488728797120358

  Columns 31 through 35

   0.488499697364629   0.488265344415394   0.488025611410454   0.487780368541361   0.487529482997913

  Columns 36 through 40

   0.487272818912314   0.487010237302997   0.486741596018158   0.486466749678986   0.486185549622694

  Columns 41 through 45

   0.485897843845249   0.485603476943984   0.485302290059943   0.484994120820149   0.484678803279678

  Columns 46 through 50

   0.484356167863639                   0                   0                   0                   0

  Columns 51 through 55

                   0                   0                   0                   0                   0

  Columns 56 through 60

                   0                   0                   0                   0                   0

  Column 61

                   0


inner_code_BER =

  Columns 1 through 5

   0.493564391990778   0.493443811508779   0.493320606791423   0.493194714619031   0.493066070193132

  Columns 6 through 10

   0.492934607098729   0.492800257265856   0.492662950930429   0.492522616594357   0.492379180984969

  Columns 11 through 15

   0.492232569013685   0.492082703734013   0.491929506298792   0.491772895916751   0.491612789808374

  Columns 16 through 20

   0.491449103161023   0.491281749083432   0.491110638559454   0.490935680401183   0.490756781201384

  Columns 21 through 25

   0.490573845285290   0.490386774661733   0.490195468973683   0.489999825448162   0.489799738845542

  Columns 26 through 30

   0.489595101408318   0.489385802809266   0.489171730099108   0.488952767653642   0.488728797120358

  Columns 31 through 35

   0.488499697364629   0.488265344415393   0.488025611410453   0.487780368541361   0.487529482997913

  Columns 36 through 40

   0.487272818912314   0.487010237302997   0.486741596018158   0.486466749678986   0.486185549622694

  Columns 41 through 45

   0.485897843845247   0.485603476943984   0.485302290059942   0.484994120820147   0.484678803279677

  Columns 46 through 50

   0.484356167863639   0.484026041309073                   0                   0                   0

  Columns 51 through 55

                   0                   0                   0                   0                   0

  Columns 56 through 60

                   0                   0                   0                   0                   0

  Column 61

                   0


outer_code_BER =

  Columns 1 through 5

   0.493564391990779   0.493443811508778   0.493320606791422   0.493194714619031   0.493066070193132

  Columns 6 through 10

   0.492934607098729   0.492800257265856   0.492662950930428   0.492522616594356   0.492379180984968

  Columns 11 through 15

   0.492232569013686   0.492082703734013   0.491929506298792   0.491772895916752   0.491612789808375

  Columns 16 through 20

   0.491449103161025   0.491281749083432   0.491110638559454   0.490935680401183   0.490756781201385

  Columns 21 through 25

   0.490573845285290   0.490386774661733   0.490195468973685   0.489999825448161   0.489799738845542

  Columns 26 through 30

   0.489595101408318   0.489385802809265   0.489171730099108   0.488952767653641   0.488728797120358

  Columns 31 through 35

   0.488499697364629   0.488265344415394   0.488025611410454   0.487780368541361   0.487529482997913

  Columns 36 through 40

   0.487272818912314   0.487010237302997   0.486741596018158   0.486466749678986   0.486185549622694

  Columns 41 through 45

   0.485897843845249   0.485603476943984   0.485302290059943   0.484994120820149   0.484678803279678

  Columns 46 through 50

   0.484356167863639   0.484026041309073                   0                   0                   0

  Columns 51 through 55

                   0                   0                   0                   0                   0

  Columns 56 through 60

                   0                   0                   0                   0                   0

  Column 61

                   0


inner_code_BER =

  Columns 1 through 5

   0.493564391990778   0.493443811508779   0.493320606791423   0.493194714619031   0.493066070193132

  Columns 6 through 10

   0.492934607098729   0.492800257265856   0.492662950930429   0.492522616594357   0.492379180984969

  Columns 11 through 15

   0.492232569013685   0.492082703734013   0.491929506298792   0.491772895916751   0.491612789808374

  Columns 16 through 20

   0.491449103161023   0.491281749083432   0.491110638559454   0.490935680401183   0.490756781201384

  Columns 21 through 25

   0.490573845285290   0.490386774661733   0.490195468973683   0.489999825448162   0.489799738845542

  Columns 26 through 30

   0.489595101408318   0.489385802809266   0.489171730099108   0.488952767653642   0.488728797120358

  Columns 31 through 35

   0.488499697364629   0.488265344415393   0.488025611410453   0.487780368541361   0.487529482997913

  Columns 36 through 40

   0.487272818912314   0.487010237302997   0.486741596018158   0.486466749678986   0.486185549622694

  Columns 41 through 45

   0.485897843845247   0.485603476943984   0.485302290059942   0.484994120820147   0.484678803279677

  Columns 46 through 50

   0.484356167863639   0.484026041309073   0.483688246606752                   0                   0

  Columns 51 through 55

                   0                   0                   0                   0                   0

  Columns 56 through 60

                   0                   0                   0                   0                   0

  Column 61

                   0


outer_code_BER =

  Columns 1 through 5

   0.493564391990779   0.493443811508778   0.493320606791422   0.493194714619031   0.493066070193132

  Columns 6 through 10

   0.492934607098729   0.492800257265856   0.492662950930428   0.492522616594356   0.492379180984968

  Columns 11 through 15

   0.492232569013686   0.492082703734013   0.491929506298792   0.491772895916752   0.491612789808375

  Columns 16 through 20

   0.491449103161025   0.491281749083432   0.491110638559454   0.490935680401183   0.490756781201385

  Columns 21 through 25

   0.490573845285290   0.490386774661733   0.490195468973685   0.489999825448161   0.489799738845542

  Columns 26 through 30

   0.489595101408318   0.489385802809265   0.489171730099108   0.488952767653641   0.488728797120358

  Columns 31 through 35

   0.488499697364629   0.488265344415394   0.488025611410454   0.487780368541361   0.487529482997913

  Columns 36 through 40

   0.487272818912314   0.487010237302997   0.486741596018158   0.486466749678986   0.486185549622694

  Columns 41 through 45

   0.485897843845249   0.485603476943984   0.485302290059943   0.484994120820149   0.484678803279678

  Columns 46 through 50

   0.484356167863639   0.484026041309073   0.483688246606751                   0                   0

  Columns 51 through 55

                   0                   0                   0                   0                   0

  Columns 56 through 60

                   0                   0                   0                   0                   0

  Column 61

                   0


inner_code_BER =

  Columns 1 through 5

   0.493564391990778   0.493443811508779   0.493320606791423   0.493194714619031   0.493066070193132

  Columns 6 through 10

   0.492934607098729   0.492800257265856   0.492662950930429   0.492522616594357   0.492379180984969

  Columns 11 through 15

   0.492232569013685   0.492082703734013   0.491929506298792   0.491772895916751   0.491612789808374

  Columns 16 through 20

   0.491449103161023   0.491281749083432   0.491110638559454   0.490935680401183   0.490756781201384

  Columns 21 through 25

   0.490573845285290   0.490386774661733   0.490195468973683   0.489999825448162   0.489799738845542

  Columns 26 through 30

   0.489595101408318   0.489385802809266   0.489171730099108   0.488952767653642   0.488728797120358

  Columns 31 through 35

   0.488499697364629   0.488265344415393   0.488025611410453   0.487780368541361   0.487529482997913

  Columns 36 through 40

   0.487272818912314   0.487010237302997   0.486741596018158   0.486466749678986   0.486185549622694

  Columns 41 through 45

   0.485897843845247   0.485603476943984   0.485302290059942   0.484994120820147   0.484678803279677

  Columns 46 through 50

   0.484356167863639   0.484026041309073   0.483688246606752   0.483342602942930                   0

  Columns 51 through 55

                   0                   0                   0                   0                   0

  Columns 56 through 60

                   0                   0                   0                   0                   0

  Column 61

                   0


outer_code_BER =

  Columns 1 through 5

   0.493564391990779   0.493443811508778   0.493320606791422   0.493194714619031   0.493066070193132

  Columns 6 through 10

   0.492934607098729   0.492800257265856   0.492662950930428   0.492522616594356   0.492379180984968

  Columns 11 through 15

   0.492232569013686   0.492082703734013   0.491929506298792   0.491772895916752   0.491612789808375

  Columns 16 through 20

   0.491449103161025   0.491281749083432   0.491110638559454   0.490935680401183   0.490756781201385

  Columns 21 through 25

   0.490573845285290   0.490386774661733   0.490195468973685   0.489999825448161   0.489799738845542

  Columns 26 through 30

   0.489595101408318   0.489385802809265   0.489171730099108   0.488952767653641   0.488728797120358

  Columns 31 through 35

   0.488499697364629   0.488265344415394   0.488025611410454   0.487780368541361   0.487529482997913

  Columns 36 through 40

   0.487272818912314   0.487010237302997   0.486741596018158   0.486466749678986   0.486185549622694

  Columns 41 through 45

   0.485897843845249   0.485603476943984   0.485302290059943   0.484994120820149   0.484678803279678

  Columns 46 through 50

   0.484356167863639   0.484026041309073   0.483688246606751   0.483342602942929                   0

  Columns 51 through 55

                   0                   0                   0                   0                   0

  Columns 56 through 60

                   0                   0                   0                   0                   0

  Column 61

                   0


inner_code_BER =

  Columns 1 through 5

   0.493564391990778   0.493443811508779   0.493320606791423   0.493194714619031   0.493066070193132

  Columns 6 through 10

   0.492934607098729   0.492800257265856   0.492662950930429   0.492522616594357   0.492379180984969

  Columns 11 through 15

   0.492232569013685   0.492082703734013   0.491929506298792   0.491772895916751   0.491612789808374

  Columns 16 through 20

   0.491449103161023   0.491281749083432   0.491110638559454   0.490935680401183   0.490756781201384

  Columns 21 through 25

   0.490573845285290   0.490386774661733   0.490195468973683   0.489999825448162   0.489799738845542

  Columns 26 through 30

   0.489595101408318   0.489385802809266   0.489171730099108   0.488952767653642   0.488728797120358

  Columns 31 through 35

   0.488499697364629   0.488265344415393   0.488025611410453   0.487780368541361   0.487529482997913

  Columns 36 through 40

   0.487272818912314   0.487010237302997   0.486741596018158   0.486466749678986   0.486185549622694

  Columns 41 through 45

   0.485897843845247   0.485603476943984   0.485302290059942   0.484994120820147   0.484678803279677

  Columns 46 through 50

   0.484356167863639   0.484026041309073   0.483688246606752   0.483342602942930   0.482988925641073

  Columns 51 through 55

                   0                   0                   0                   0                   0

  Columns 56 through 60

                   0                   0                   0                   0                   0

  Column 61

                   0


outer_code_BER =

  Columns 1 through 5

   0.493564391990779   0.493443811508778   0.493320606791422   0.493194714619031   0.493066070193132

  Columns 6 through 10

   0.492934607098729   0.492800257265856   0.492662950930428   0.492522616594356   0.492379180984968

  Columns 11 through 15

   0.492232569013686   0.492082703734013   0.491929506298792   0.491772895916752   0.491612789808375

  Columns 16 through 20

   0.491449103161025   0.491281749083432   0.491110638559454   0.490935680401183   0.490756781201385

  Columns 21 through 25

   0.490573845285290   0.490386774661733   0.490195468973685   0.489999825448161   0.489799738845542

  Columns 26 through 30

   0.489595101408318   0.489385802809265   0.489171730099108   0.488952767653641   0.488728797120358

  Columns 31 through 35

   0.488499697364629   0.488265344415394   0.488025611410454   0.487780368541361   0.487529482997913

  Columns 36 through 40

   0.487272818912314   0.487010237302997   0.486741596018158   0.486466749678986   0.486185549622694

  Columns 41 through 45

   0.485897843845249   0.485603476943984   0.485302290059943   0.484994120820149   0.484678803279678

  Columns 46 through 50

   0.484356167863639   0.484026041309073   0.483688246606751   0.483342602942929   0.482988925641074

  Columns 51 through 55

                   0                   0                   0                   0                   0

  Columns 56 through 60

                   0                   0                   0                   0                   0

  Column 61

                   0


inner_code_BER =

  Columns 1 through 5

   0.493564391990778   0.493443811508779   0.493320606791423   0.493194714619031   0.493066070193132

  Columns 6 through 10

   0.492934607098729   0.492800257265856   0.492662950930429   0.492522616594357   0.492379180984969

  Columns 11 through 15

   0.492232569013685   0.492082703734013   0.491929506298792   0.491772895916751   0.491612789808374

  Columns 16 through 20

   0.491449103161023   0.491281749083432   0.491110638559454   0.490935680401183   0.490756781201384

  Columns 21 through 25

   0.490573845285290   0.490386774661733   0.490195468973683   0.489999825448162   0.489799738845542

  Columns 26 through 30

   0.489595101408318   0.489385802809266   0.489171730099108   0.488952767653642   0.488728797120358

  Columns 31 through 35

   0.488499697364629   0.488265344415393   0.488025611410453   0.487780368541361   0.487529482997913

  Columns 36 through 40

   0.487272818912314   0.487010237302997   0.486741596018158   0.486466749678986   0.486185549622694

  Columns 41 through 45

   0.485897843845247   0.485603476943984   0.485302290059942   0.484994120820147   0.484678803279677

  Columns 46 through 50

   0.484356167863639   0.484026041309073   0.483688246606752   0.483342602942930   0.482988925641073

  Columns 51 through 55

   0.482627026103552                   0                   0                   0                   0

  Columns 56 through 60

                   0                   0                   0                   0                   0

  Column 61

                   0


outer_code_BER =

  Columns 1 through 5

   0.493564391990779   0.493443811508778   0.493320606791422   0.493194714619031   0.493066070193132

  Columns 6 through 10

   0.492934607098729   0.492800257265856   0.492662950930428   0.492522616594356   0.492379180984968

  Columns 11 through 15

   0.492232569013686   0.492082703734013   0.491929506298792   0.491772895916752   0.491612789808375

  Columns 16 through 20

   0.491449103161025   0.491281749083432   0.491110638559454   0.490935680401183   0.490756781201385

  Columns 21 through 25

   0.490573845285290   0.490386774661733   0.490195468973685   0.489999825448161   0.489799738845542

  Columns 26 through 30

   0.489595101408318   0.489385802809265   0.489171730099108   0.488952767653641   0.488728797120358

  Columns 31 through 35

   0.488499697364629   0.488265344415394   0.488025611410454   0.487780368541361   0.487529482997913

  Columns 36 through 40

   0.487272818912314   0.487010237302997   0.486741596018158   0.486466749678986   0.486185549622694

  Columns 41 through 45

   0.485897843845249   0.485603476943984   0.485302290059943   0.484994120820149   0.484678803279678

  Columns 46 through 50

   0.484356167863639   0.484026041309073   0.483688246606751   0.483342602942929   0.482988925641074

  Columns 51 through 55

   0.482627026103551                   0                   0                   0                   0

  Columns 56 through 60

                   0                   0                   0                   0                   0

  Column 61

                   0


inner_code_BER =

  Columns 1 through 5

   0.493564391990778   0.493443811508779   0.493320606791423   0.493194714619031   0.493066070193132

  Columns 6 through 10

   0.492934607098729   0.492800257265856   0.492662950930429   0.492522616594357   0.492379180984969

  Columns 11 through 15

   0.492232569013685   0.492082703734013   0.491929506298792   0.491772895916751   0.491612789808374

  Columns 16 through 20

   0.491449103161023   0.491281749083432   0.491110638559454   0.490935680401183   0.490756781201384

  Columns 21 through 25

   0.490573845285290   0.490386774661733   0.490195468973683   0.489999825448162   0.489799738845542

  Columns 26 through 30

   0.489595101408318   0.489385802809266   0.489171730099108   0.488952767653642   0.488728797120358

  Columns 31 through 35

   0.488499697364629   0.488265344415393   0.488025611410453   0.487780368541361   0.487529482997913

  Columns 36 through 40

   0.487272818912314   0.487010237302997   0.486741596018158   0.486466749678986   0.486185549622694

  Columns 41 through 45

   0.485897843845247   0.485603476943984   0.485302290059942   0.484994120820147   0.484678803279677

  Columns 46 through 50

   0.484356167863639   0.484026041309073   0.483688246606752   0.483342602942930   0.482988925641073

  Columns 51 through 55

   0.482627026103552   0.482256711753337                   0                   0                   0

  Columns 56 through 60

                   0                   0                   0                   0                   0

  Column 61

                   0


outer_code_BER =

  Columns 1 through 5

   0.493564391990779   0.493443811508778   0.493320606791422   0.493194714619031   0.493066070193132

  Columns 6 through 10

   0.492934607098729   0.492800257265856   0.492662950930428   0.492522616594356   0.492379180984968

  Columns 11 through 15

   0.492232569013686   0.492082703734013   0.491929506298792   0.491772895916752   0.491612789808375

  Columns 16 through 20

   0.491449103161025   0.491281749083432   0.491110638559454   0.490935680401183   0.490756781201385

  Columns 21 through 25

   0.490573845285290   0.490386774661733   0.490195468973685   0.489999825448161   0.489799738845542

  Columns 26 through 30

   0.489595101408318   0.489385802809265   0.489171730099108   0.488952767653641   0.488728797120358

  Columns 31 through 35

   0.488499697364629   0.488265344415394   0.488025611410454   0.487780368541361   0.487529482997913

  Columns 36 through 40

   0.487272818912314   0.487010237302997   0.486741596018158   0.486466749678986   0.486185549622694

  Columns 41 through 45

   0.485897843845249   0.485603476943984   0.485302290059943   0.484994120820149   0.484678803279678

  Columns 46 through 50

   0.484356167863639   0.484026041309073   0.483688246606751   0.483342602942929   0.482988925641074

  Columns 51 through 55

   0.482627026103551   0.482256711753338                   0                   0                   0

  Columns 56 through 60

                   0                   0                   0                   0                   0

  Column 61

                   0


inner_code_BER =

  Columns 1 through 5

   0.493564391990778   0.493443811508779   0.493320606791423   0.493194714619031   0.493066070193132

  Columns 6 through 10

   0.492934607098729   0.492800257265856   0.492662950930429   0.492522616594357   0.492379180984969

  Columns 11 through 15

   0.492232569013685   0.492082703734013   0.491929506298792   0.491772895916751   0.491612789808374

  Columns 16 through 20

   0.491449103161023   0.491281749083432   0.491110638559454   0.490935680401183   0.490756781201384

  Columns 21 through 25

   0.490573845285290   0.490386774661733   0.490195468973683   0.489999825448162   0.489799738845542

  Columns 26 through 30

   0.489595101408318   0.489385802809266   0.489171730099108   0.488952767653642   0.488728797120358

  Columns 31 through 35

   0.488499697364629   0.488265344415393   0.488025611410453   0.487780368541361   0.487529482997913

  Columns 36 through 40

   0.487272818912314   0.487010237302997   0.486741596018158   0.486466749678986   0.486185549622694

  Columns 41 through 45

   0.485897843845247   0.485603476943984   0.485302290059942   0.484994120820147   0.484678803279677

  Columns 46 through 50

   0.484356167863639   0.484026041309073   0.483688246606752   0.483342602942930   0.482988925641073

  Columns 51 through 55

   0.482627026103552   0.482256711753337   0.481877785975748                   0                   0

  Columns 56 through 60

                   0                   0                   0                   0                   0

  Column 61

                   0


outer_code_BER =

  Columns 1 through 5

   0.493564391990779   0.493443811508778   0.493320606791422   0.493194714619031   0.493066070193132

  Columns 6 through 10

   0.492934607098729   0.492800257265856   0.492662950930428   0.492522616594356   0.492379180984968

  Columns 11 through 15

   0.492232569013686   0.492082703734013   0.491929506298792   0.491772895916752   0.491612789808375

  Columns 16 through 20

   0.491449103161025   0.491281749083432   0.491110638559454   0.490935680401183   0.490756781201385

  Columns 21 through 25

   0.490573845285290   0.490386774661733   0.490195468973685   0.489999825448161   0.489799738845542

  Columns 26 through 30

   0.489595101408318   0.489385802809265   0.489171730099108   0.488952767653641   0.488728797120358

  Columns 31 through 35

   0.488499697364629   0.488265344415394   0.488025611410454   0.487780368541361   0.487529482997913

  Columns 36 through 40

   0.487272818912314   0.487010237302997   0.486741596018158   0.486466749678986   0.486185549622694

  Columns 41 through 45

   0.485897843845249   0.485603476943984   0.485302290059943   0.484994120820149   0.484678803279678

  Columns 46 through 50

   0.484356167863639   0.484026041309073   0.483688246606751   0.483342602942929   0.482988925641074

  Columns 51 through 55

   0.482627026103551   0.482256711753338   0.481877785975748                   0                   0

  Columns 56 through 60

                   0                   0                   0                   0                   0

  Column 61

                   0


inner_code_BER =

  Columns 1 through 5

   0.493564391990778   0.493443811508779   0.493320606791423   0.493194714619031   0.493066070193132

  Columns 6 through 10

   0.492934607098729   0.492800257265856   0.492662950930429   0.492522616594357   0.492379180984969

  Columns 11 through 15

   0.492232569013685   0.492082703734013   0.491929506298792   0.491772895916751   0.491612789808374

  Columns 16 through 20

   0.491449103161023   0.491281749083432   0.491110638559454   0.490935680401183   0.490756781201384

  Columns 21 through 25

   0.490573845285290   0.490386774661733   0.490195468973683   0.489999825448162   0.489799738845542

  Columns 26 through 30

   0.489595101408318   0.489385802809266   0.489171730099108   0.488952767653642   0.488728797120358

  Columns 31 through 35

   0.488499697364629   0.488265344415393   0.488025611410453   0.487780368541361   0.487529482997913

  Columns 36 through 40

   0.487272818912314   0.487010237302997   0.486741596018158   0.486466749678986   0.486185549622694

  Columns 41 through 45

   0.485897843845247   0.485603476943984   0.485302290059942   0.484994120820147   0.484678803279677

  Columns 46 through 50

   0.484356167863639   0.484026041309073   0.483688246606752   0.483342602942930   0.482988925641073

  Columns 51 through 55

   0.482627026103552   0.482256711753337   0.481877785975748   0.481490048060228                   0

  Columns 56 through 60

                   0                   0                   0                   0                   0

  Column 61

                   0


outer_code_BER =

  Columns 1 through 5

   0.493564391990779   0.493443811508778   0.493320606791422   0.493194714619031   0.493066070193132

  Columns 6 through 10

   0.492934607098729   0.492800257265856   0.492662950930428   0.492522616594356   0.492379180984968

  Columns 11 through 15

   0.492232569013686   0.492082703734013   0.491929506298792   0.491772895916752   0.491612789808375

  Columns 16 through 20

   0.491449103161025   0.491281749083432   0.491110638559454   0.490935680401183   0.490756781201385

  Columns 21 through 25

   0.490573845285290   0.490386774661733   0.490195468973685   0.489999825448161   0.489799738845542

  Columns 26 through 30

   0.489595101408318   0.489385802809265   0.489171730099108   0.488952767653641   0.488728797120358

  Columns 31 through 35

   0.488499697364629   0.488265344415394   0.488025611410454   0.487780368541361   0.487529482997913

  Columns 36 through 40

   0.487272818912314   0.487010237302997   0.486741596018158   0.486466749678986   0.486185549622694

  Columns 41 through 45

   0.485897843845249   0.485603476943984   0.485302290059943   0.484994120820149   0.484678803279678

  Columns 46 through 50

   0.484356167863639   0.484026041309073   0.483688246606751   0.483342602942929   0.482988925641074

  Columns 51 through 55

   0.482627026103551   0.482256711753338   0.481877785975748   0.481490048060228                   0

  Columns 56 through 60

                   0                   0                   0                   0                   0

  Column 61

                   0


inner_code_BER =

  Columns 1 through 5

   0.493564391990778   0.493443811508779   0.493320606791423   0.493194714619031   0.493066070193132

  Columns 6 through 10

   0.492934607098729   0.492800257265856   0.492662950930429   0.492522616594357   0.492379180984969

  Columns 11 through 15

   0.492232569013685   0.492082703734013   0.491929506298792   0.491772895916751   0.491612789808374

  Columns 16 through 20

   0.491449103161023   0.491281749083432   0.491110638559454   0.490935680401183   0.490756781201384

  Columns 21 through 25

   0.490573845285290   0.490386774661733   0.490195468973683   0.489999825448162   0.489799738845542

  Columns 26 through 30

   0.489595101408318   0.489385802809266   0.489171730099108   0.488952767653642   0.488728797120358

  Columns 31 through 35

   0.488499697364629   0.488265344415393   0.488025611410453   0.487780368541361   0.487529482997913

  Columns 36 through 40

   0.487272818912314   0.487010237302997   0.486741596018158   0.486466749678986   0.486185549622694

  Columns 41 through 45

   0.485897843845247   0.485603476943984   0.485302290059942   0.484994120820147   0.484678803279677

  Columns 46 through 50

   0.484356167863639   0.484026041309073   0.483688246606752   0.483342602942930   0.482988925641073

  Columns 51 through 55

   0.482627026103552   0.482256711753337   0.481877785975748   0.481490048060228   0.481093293142220

  Columns 56 through 60

                   0                   0                   0                   0                   0

  Column 61

                   0


outer_code_BER =

  Columns 1 through 5

   0.493564391990779   0.493443811508778   0.493320606791422   0.493194714619031   0.493066070193132

  Columns 6 through 10

   0.492934607098729   0.492800257265856   0.492662950930428   0.492522616594356   0.492379180984968

  Columns 11 through 15

   0.492232569013686   0.492082703734013   0.491929506298792   0.491772895916752   0.491612789808375

  Columns 16 through 20

   0.491449103161025   0.491281749083432   0.491110638559454   0.490935680401183   0.490756781201385

  Columns 21 through 25

   0.490573845285290   0.490386774661733   0.490195468973685   0.489999825448161   0.489799738845542

  Columns 26 through 30

   0.489595101408318   0.489385802809265   0.489171730099108   0.488952767653641   0.488728797120358

  Columns 31 through 35

   0.488499697364629   0.488265344415394   0.488025611410454   0.487780368541361   0.487529482997913

  Columns 36 through 40

   0.487272818912314   0.487010237302997   0.486741596018158   0.486466749678986   0.486185549622694

  Columns 41 through 45

   0.485897843845249   0.485603476943984   0.485302290059943   0.484994120820149   0.484678803279678

  Columns 46 through 50

   0.484356167863639   0.484026041309073   0.483688246606751   0.483342602942929   0.482988925641074

  Columns 51 through 55

   0.482627026103551   0.482256711753338   0.481877785975748   0.481490048060228   0.481093293142220

  Columns 56 through 60

                   0                   0                   0                   0                   0

  Column 61

                   0


inner_code_BER =

  Columns 1 through 5

   0.493564391990778   0.493443811508779   0.493320606791423   0.493194714619031   0.493066070193132

  Columns 6 through 10

   0.492934607098729   0.492800257265856   0.492662950930429   0.492522616594357   0.492379180984969

  Columns 11 through 15

   0.492232569013685   0.492082703734013   0.491929506298792   0.491772895916751   0.491612789808374

  Columns 16 through 20

   0.491449103161023   0.491281749083432   0.491110638559454   0.490935680401183   0.490756781201384

  Columns 21 through 25

   0.490573845285290   0.490386774661733   0.490195468973683   0.489999825448162   0.489799738845542

  Columns 26 through 30

   0.489595101408318   0.489385802809266   0.489171730099108   0.488952767653642   0.488728797120358

  Columns 31 through 35

   0.488499697364629   0.488265344415393   0.488025611410453   0.487780368541361   0.487529482997913

  Columns 36 through 40

   0.487272818912314   0.487010237302997   0.486741596018158   0.486466749678986   0.486185549622694

  Columns 41 through 45

   0.485897843845247   0.485603476943984   0.485302290059942   0.484994120820147   0.484678803279677

  Columns 46 through 50

   0.484356167863639   0.484026041309073   0.483688246606752   0.483342602942930   0.482988925641073

  Columns 51 through 55

   0.482627026103552   0.482256711753337   0.481877785975748   0.481490048060228   0.481093293142220

  Columns 56 through 60

   0.480687312145141                   0                   0                   0                   0

  Column 61

                   0


outer_code_BER =

  Columns 1 through 5

   0.493564391990779   0.493443811508778   0.493320606791422   0.493194714619031   0.493066070193132

  Columns 6 through 10

   0.492934607098729   0.492800257265856   0.492662950930428   0.492522616594356   0.492379180984968

  Columns 11 through 15

   0.492232569013686   0.492082703734013   0.491929506298792   0.491772895916752   0.491612789808375

  Columns 16 through 20

   0.491449103161025   0.491281749083432   0.491110638559454   0.490935680401183   0.490756781201385

  Columns 21 through 25

   0.490573845285290   0.490386774661733   0.490195468973685   0.489999825448161   0.489799738845542

  Columns 26 through 30

   0.489595101408318   0.489385802809265   0.489171730099108   0.488952767653641   0.488728797120358

  Columns 31 through 35

   0.488499697364629   0.488265344415394   0.488025611410454   0.487780368541361   0.487529482997913

  Columns 36 through 40

   0.487272818912314   0.487010237302997   0.486741596018158   0.486466749678986   0.486185549622694

  Columns 41 through 45

   0.485897843845249   0.485603476943984   0.485302290059943   0.484994120820149   0.484678803279678

  Columns 46 through 50

   0.484356167863639   0.484026041309073   0.483688246606751   0.483342602942929   0.482988925641074

  Columns 51 through 55

   0.482627026103551   0.482256711753338   0.481877785975748   0.481490048060228   0.481093293142220

  Columns 56 through 60

   0.480687312145141                   0                   0                   0                   0

  Column 61

                   0


inner_code_BER =

  Columns 1 through 5

   0.493564391990778   0.493443811508779   0.493320606791423   0.493194714619031   0.493066070193132

  Columns 6 through 10

   0.492934607098729   0.492800257265856   0.492662950930429   0.492522616594357   0.492379180984969

  Columns 11 through 15

   0.492232569013685   0.492082703734013   0.491929506298792   0.491772895916751   0.491612789808374

  Columns 16 through 20

   0.491449103161023   0.491281749083432   0.491110638559454   0.490935680401183   0.490756781201384

  Columns 21 through 25

   0.490573845285290   0.490386774661733   0.490195468973683   0.489999825448162   0.489799738845542

  Columns 26 through 30

   0.489595101408318   0.489385802809266   0.489171730099108   0.488952767653642   0.488728797120358

  Columns 31 through 35

   0.488499697364629   0.488265344415393   0.488025611410453   0.487780368541361   0.487529482997913

  Columns 36 through 40

   0.487272818912314   0.487010237302997   0.486741596018158   0.486466749678986   0.486185549622694

  Columns 41 through 45

   0.485897843845247   0.485603476943984   0.485302290059942   0.484994120820147   0.484678803279677

  Columns 46 through 50

   0.484356167863639   0.484026041309073   0.483688246606752   0.483342602942930   0.482988925641073

  Columns 51 through 55

   0.482627026103552   0.482256711753337   0.481877785975748   0.481490048060228   0.481093293142220

  Columns 56 through 60

   0.480687312145141   0.480271891722554                   0                   0                   0

  Column 61

                   0


outer_code_BER =

  Columns 1 through 5

   0.493564391990779   0.493443811508778   0.493320606791422   0.493194714619031   0.493066070193132

  Columns 6 through 10

   0.492934607098729   0.492800257265856   0.492662950930428   0.492522616594356   0.492379180984968

  Columns 11 through 15

   0.492232569013686   0.492082703734013   0.491929506298792   0.491772895916752   0.491612789808375

  Columns 16 through 20

   0.491449103161025   0.491281749083432   0.491110638559454   0.490935680401183   0.490756781201385

  Columns 21 through 25

   0.490573845285290   0.490386774661733   0.490195468973685   0.489999825448161   0.489799738845542

  Columns 26 through 30

   0.489595101408318   0.489385802809265   0.489171730099108   0.488952767653641   0.488728797120358

  Columns 31 through 35

   0.488499697364629   0.488265344415394   0.488025611410454   0.487780368541361   0.487529482997913

  Columns 36 through 40

   0.487272818912314   0.487010237302997   0.486741596018158   0.486466749678986   0.486185549622694

  Columns 41 through 45

   0.485897843845249   0.485603476943984   0.485302290059943   0.484994120820149   0.484678803279678

  Columns 46 through 50

   0.484356167863639   0.484026041309073   0.483688246606751   0.483342602942929   0.482988925641074

  Columns 51 through 55

   0.482627026103551   0.482256711753338   0.481877785975748   0.481490048060228   0.481093293142220

  Columns 56 through 60

   0.480687312145141   0.480271891722554                   0                   0                   0

  Column 61

                   0


inner_code_BER =

  Columns 1 through 5

   0.493564391990778   0.493443811508779   0.493320606791423   0.493194714619031   0.493066070193132

  Columns 6 through 10

   0.492934607098729   0.492800257265856   0.492662950930429   0.492522616594357   0.492379180984969

  Columns 11 through 15

   0.492232569013685   0.492082703734013   0.491929506298792   0.491772895916751   0.491612789808374

  Columns 16 through 20

   0.491449103161023   0.491281749083432   0.491110638559454   0.490935680401183   0.490756781201384

  Columns 21 through 25

   0.490573845285290   0.490386774661733   0.490195468973683   0.489999825448162   0.489799738845542

  Columns 26 through 30

   0.489595101408318   0.489385802809266   0.489171730099108   0.488952767653642   0.488728797120358

  Columns 31 through 35

   0.488499697364629   0.488265344415393   0.488025611410453   0.487780368541361   0.487529482997913

  Columns 36 through 40

   0.487272818912314   0.487010237302997   0.486741596018158   0.486466749678986   0.486185549622694

  Columns 41 through 45

   0.485897843845247   0.485603476943984   0.485302290059942   0.484994120820147   0.484678803279677

  Columns 46 through 50

   0.484356167863639   0.484026041309073   0.483688246606752   0.483342602942930   0.482988925641073

  Columns 51 through 55

   0.482627026103552   0.482256711753337   0.481877785975748   0.481490048060228   0.481093293142220

  Columns 56 through 60

   0.480687312145141   0.480271891722554   0.479846814200536                   0                   0

  Column 61

                   0


outer_code_BER =

  Columns 1 through 5

   0.493564391990779   0.493443811508778   0.493320606791422   0.493194714619031   0.493066070193132

  Columns 6 through 10

   0.492934607098729   0.492800257265856   0.492662950930428   0.492522616594356   0.492379180984968

  Columns 11 through 15

   0.492232569013686   0.492082703734013   0.491929506298792   0.491772895916752   0.491612789808375

  Columns 16 through 20

   0.491449103161025   0.491281749083432   0.491110638559454   0.490935680401183   0.490756781201385

  Columns 21 through 25

   0.490573845285290   0.490386774661733   0.490195468973685   0.489999825448161   0.489799738845542

  Columns 26 through 30

   0.489595101408318   0.489385802809265   0.489171730099108   0.488952767653641   0.488728797120358

  Columns 31 through 35

   0.488499697364629   0.488265344415394   0.488025611410454   0.487780368541361   0.487529482997913

  Columns 36 through 40

   0.487272818912314   0.487010237302997   0.486741596018158   0.486466749678986   0.486185549622694

  Columns 41 through 45

   0.485897843845249   0.485603476943984   0.485302290059943   0.484994120820149   0.484678803279678

  Columns 46 through 50

   0.484356167863639   0.484026041309073   0.483688246606751   0.483342602942929   0.482988925641074

  Columns 51 through 55

   0.482627026103551   0.482256711753338   0.481877785975748   0.481490048060228   0.481093293142220

  Columns 56 through 60

   0.480687312145141   0.480271891722554   0.479846814200536                   0                   0

  Column 61

                   0


inner_code_BER =

  Columns 1 through 5

   0.493564391990778   0.493443811508779   0.493320606791423   0.493194714619031   0.493066070193132

  Columns 6 through 10

   0.492934607098729   0.492800257265856   0.492662950930429   0.492522616594357   0.492379180984969

  Columns 11 through 15

   0.492232569013685   0.492082703734013   0.491929506298792   0.491772895916751   0.491612789808374

  Columns 16 through 20

   0.491449103161023   0.491281749083432   0.491110638559454   0.490935680401183   0.490756781201384

  Columns 21 through 25

   0.490573845285290   0.490386774661733   0.490195468973683   0.489999825448162   0.489799738845542

  Columns 26 through 30

   0.489595101408318   0.489385802809266   0.489171730099108   0.488952767653642   0.488728797120358

  Columns 31 through 35

   0.488499697364629   0.488265344415393   0.488025611410453   0.487780368541361   0.487529482997913

  Columns 36 through 40

   0.487272818912314   0.487010237302997   0.486741596018158   0.486466749678986   0.486185549622694

  Columns 41 through 45

   0.485897843845247   0.485603476943984   0.485302290059942   0.484994120820147   0.484678803279677

  Columns 46 through 50

   0.484356167863639   0.484026041309073   0.483688246606752   0.483342602942930   0.482988925641073

  Columns 51 through 55

   0.482627026103552   0.482256711753337   0.481877785975748   0.481490048060228   0.481093293142220

  Columns 56 through 60

   0.480687312145141   0.480271891722554   0.479846814200536   0.479411857520364                   0

  Column 61

                   0


outer_code_BER =

  Columns 1 through 5

   0.493564391990779   0.493443811508778   0.493320606791422   0.493194714619031   0.493066070193132

  Columns 6 through 10

   0.492934607098729   0.492800257265856   0.492662950930428   0.492522616594356   0.492379180984968

  Columns 11 through 15

   0.492232569013686   0.492082703734013   0.491929506298792   0.491772895916752   0.491612789808375

  Columns 16 through 20

   0.491449103161025   0.491281749083432   0.491110638559454   0.490935680401183   0.490756781201385

  Columns 21 through 25

   0.490573845285290   0.490386774661733   0.490195468973685   0.489999825448161   0.489799738845542

  Columns 26 through 30

   0.489595101408318   0.489385802809265   0.489171730099108   0.488952767653641   0.488728797120358

  Columns 31 through 35

   0.488499697364629   0.488265344415394   0.488025611410454   0.487780368541361   0.487529482997913

  Columns 36 through 40

   0.487272818912314   0.487010237302997   0.486741596018158   0.486466749678986   0.486185549622694

  Columns 41 through 45

   0.485897843845249   0.485603476943984   0.485302290059943   0.484994120820149   0.484678803279678

  Columns 46 through 50

   0.484356167863639   0.484026041309073   0.483688246606751   0.483342602942929   0.482988925641074

  Columns 51 through 55

   0.482627026103551   0.482256711753338   0.481877785975748   0.481490048060228   0.481093293142220

  Columns 56 through 60

   0.480687312145141   0.480271891722554   0.479846814200536   0.479411857520364                   0

  Column 61

                   0


inner_code_BER =

  Columns 1 through 5

   0.493564391990778   0.493443811508779   0.493320606791423   0.493194714619031   0.493066070193132

  Columns 6 through 10

   0.492934607098729   0.492800257265856   0.492662950930429   0.492522616594357   0.492379180984969

  Columns 11 through 15

   0.492232569013685   0.492082703734013   0.491929506298792   0.491772895916751   0.491612789808374

  Columns 16 through 20

   0.491449103161023   0.491281749083432   0.491110638559454   0.490935680401183   0.490756781201384

  Columns 21 through 25

   0.490573845285290   0.490386774661733   0.490195468973683   0.489999825448162   0.489799738845542

  Columns 26 through 30

   0.489595101408318   0.489385802809266   0.489171730099108   0.488952767653642   0.488728797120358

  Columns 31 through 35

   0.488499697364629   0.488265344415393   0.488025611410453   0.487780368541361   0.487529482997913

  Columns 36 through 40

   0.487272818912314   0.487010237302997   0.486741596018158   0.486466749678986   0.486185549622694

  Columns 41 through 45

   0.485897843845247   0.485603476943984   0.485302290059942   0.484994120820147   0.484678803279677

  Columns 46 through 50

   0.484356167863639   0.484026041309073   0.483688246606752   0.483342602942930   0.482988925641073

  Columns 51 through 55

   0.482627026103552   0.482256711753337   0.481877785975748   0.481490048060228   0.481093293142220

  Columns 56 through 60

   0.480687312145141   0.480271891722554   0.479846814200536   0.479411857520364   0.478966795181526

  Column 61

                   0


outer_code_BER =

  Columns 1 through 5

   0.493564391990779   0.493443811508778   0.493320606791422   0.493194714619031   0.493066070193132

  Columns 6 through 10

   0.492934607098729   0.492800257265856   0.492662950930428   0.492522616594356   0.492379180984968

  Columns 11 through 15

   0.492232569013686   0.492082703734013   0.491929506298792   0.491772895916752   0.491612789808375

  Columns 16 through 20

   0.491449103161025   0.491281749083432   0.491110638559454   0.490935680401183   0.490756781201385

  Columns 21 through 25

   0.490573845285290   0.490386774661733   0.490195468973685   0.489999825448161   0.489799738845542

  Columns 26 through 30

   0.489595101408318   0.489385802809265   0.489171730099108   0.488952767653641   0.488728797120358

  Columns 31 through 35

   0.488499697364629   0.488265344415394   0.488025611410454   0.487780368541361   0.487529482997913

  Columns 36 through 40

   0.487272818912314   0.487010237302997   0.486741596018158   0.486466749678986   0.486185549622694

  Columns 41 through 45

   0.485897843845249   0.485603476943984   0.485302290059943   0.484994120820149   0.484678803279678

  Columns 46 through 50

   0.484356167863639   0.484026041309073   0.483688246606751   0.483342602942929   0.482988925641074

  Columns 51 through 55

   0.482627026103551   0.482256711753338   0.481877785975748   0.481490048060228   0.481093293142220

  Columns 56 through 60

   0.480687312145141   0.480271891722554   0.479846814200536   0.479411857520364   0.478966795181526

  Column 61

                   0


inner_code_BER =

  Columns 1 through 5

   0.493564391990778   0.493443811508779   0.493320606791423   0.493194714619031   0.493066070193132

  Columns 6 through 10

   0.492934607098729   0.492800257265856   0.492662950930429   0.492522616594357   0.492379180984969

  Columns 11 through 15

   0.492232569013685   0.492082703734013   0.491929506298792   0.491772895916751   0.491612789808374

  Columns 16 through 20

   0.491449103161023   0.491281749083432   0.491110638559454   0.490935680401183   0.490756781201384

  Columns 21 through 25

   0.490573845285290   0.490386774661733   0.490195468973683   0.489999825448162   0.489799738845542

  Columns 26 through 30

   0.489595101408318   0.489385802809266   0.489171730099108   0.488952767653642   0.488728797120358

  Columns 31 through 35

   0.488499697364629   0.488265344415393   0.488025611410453   0.487780368541361   0.487529482997913

  Columns 36 through 40

   0.487272818912314   0.487010237302997   0.486741596018158   0.486466749678986   0.486185549622694

  Columns 41 through 45

   0.485897843845247   0.485603476943984   0.485302290059942   0.484994120820147   0.484678803279677

  Columns 46 through 50

   0.484356167863639   0.484026041309073   0.483688246606752   0.483342602942930   0.482988925641073

  Columns 51 through 55

   0.482627026103552   0.482256711753337   0.481877785975748   0.481490048060228   0.481093293142220

  Columns 56 through 60

   0.480687312145141   0.480271891722554   0.479846814200536   0.479411857520364   0.478966795181526

  Column 61

   0.478511396185263


outer_code_BER =

  Columns 1 through 5

   0.493564391990779   0.493443811508778   0.493320606791422   0.493194714619031   0.493066070193132

  Columns 6 through 10

   0.492934607098729   0.492800257265856   0.492662950930428   0.492522616594356   0.492379180984968

  Columns 11 through 15

   0.492232569013686   0.492082703734013   0.491929506298792   0.491772895916752   0.491612789808375

  Columns 16 through 20

   0.491449103161025   0.491281749083432   0.491110638559454   0.490935680401183   0.490756781201385

  Columns 21 through 25

   0.490573845285290   0.490386774661733   0.490195468973685   0.489999825448161   0.489799738845542

  Columns 26 through 30

   0.489595101408318   0.489385802809265   0.489171730099108   0.488952767653641   0.488728797120358

  Columns 31 through 35

   0.488499697364629   0.488265344415394   0.488025611410454   0.487780368541361   0.487529482997913

  Columns 36 through 40

   0.487272818912314   0.487010237302997   0.486741596018158   0.486466749678986   0.486185549622694

  Columns 41 through 45

   0.485897843845249   0.485603476943984   0.485302290059943   0.484994120820149   0.484678803279678

  Columns 46 through 50

   0.484356167863639   0.484026041309073   0.483688246606751   0.483342602942929   0.482988925641074

  Columns 51 through 55

   0.482627026103551   0.482256711753338   0.481877785975748   0.481490048060228   0.481093293142220

  Columns 56 through 60

   0.480687312145141   0.480271891722554   0.479846814200536   0.479411857520364   0.478966795181526

  Column 61

   0.478511396185261

Elapsed time is 66537.958445 seconds.
