# Supplementary material for: An Efficient Design of Systematic Rateless Codes
Source: Hindawi journal article supplement (doi:10.1155/2020/8068414), 2020-05-19
Supplement: f1 [file 8068414.f1.zip › supplementary files/Matlab_code_for_Figure1/BER_by_DDE/仿真结果/BER_by_DDE_rayl_rate_1_2_dist2_s.txt]

��ǰ�ŵ�Ϊ�����ŵ�

EbN0indB_vec =

  Columns 1 through 5

                   0   0.100000000000000   0.200000000000000   0.300000000000000   0.400000000000000

  Columns 6 through 10

   0.500000000000000   0.600000000000000   0.700000000000000   0.800000000000000   0.900000000000000

  Columns 11 through 15

   1.000000000000000   1.100000000000000   1.200000000000000   1.300000000000000   1.400000000000000

  Columns 16 through 20

   1.500000000000000   1.600000000000000   1.700000000000000   1.800000000000000   1.900000000000000

  Columns 21 through 25

   2.000000000000000   2.100000000000000   2.200000000000000   2.300000000000000   2.400000000000000

  Columns 26 through 30

   2.500000000000000   2.600000000000000   2.700000000000000   2.800000000000000   2.900000000000000

  Columns 31 through 35

   3.000000000000000   3.100000000000000   3.200000000000000   3.300000000000000   3.400000000000000

  Columns 36 through 40

   3.500000000000000   3.600000000000000   3.700000000000000   3.800000000000000   3.900000000000000

  Columns 41 through 45

   4.000000000000000   4.100000000000000   4.200000000000000   4.300000000000000   4.400000000000000

  Columns 46 through 50

   4.500000000000000   4.600000000000000   4.700000000000000   4.800000000000000   4.900000000000000

  Columns 51 through 55

   5.000000000000000   5.100000000000000   5.200000000000000   5.300000000000000   5.400000000000000

  Columns 56 through 60

   5.500000000000000   5.600000000000000   5.700000000000000   5.800000000000000   5.900000000000000

  Column 61

   6.000000000000000

�Ʊ��ɹ�
��ǰѡ��Raptor�뵱ǰѡ��ϵͳ��
������=0.50000, ��������=0.98039, ��������=0.51000

out_node_index =

     1     2     3     8     9    60


ans =

  Columns 1 through 5

   0.004770000000000   0.261010000000000   0.092400000000000   0.069130000000000   0.512230000000000

  Column 6

   0.060460000000000


inner_code_BER =

  Columns 1 through 5

   0.178618472275941                   0                   0                   0                   0

  Columns 6 through 10

                   0                   0                   0                   0                   0

  Columns 11 through 15

                   0                   0                   0                   0                   0

  Columns 16 through 20

                   0                   0                   0                   0                   0

  Columns 21 through 25

                   0                   0                   0                   0                   0

  Columns 26 through 30

                   0                   0                   0                   0                   0

  Columns 31 through 35

                   0                   0                   0                   0                   0

  Columns 36 through 40

                   0                   0                   0                   0                   0

  Columns 41 through 45

                   0                   0                   0                   0                   0

  Columns 46 through 50

                   0                   0                   0                   0                   0

  Columns 51 through 55

                   0                   0                   0                   0                   0

  Columns 56 through 60

                   0                   0                   0                   0                   0

  Column 61

                   0


outer_code_BER =

  Columns 1 through 5

   0.178618472275942                   0                   0                   0                   0

  Columns 6 through 10

                   0                   0                   0                   0                   0

  Columns 11 through 15

                   0                   0                   0                   0                   0

  Columns 16 through 20

                   0                   0                   0                   0                   0

  Columns 21 through 25

                   0                   0                   0                   0                   0

  Columns 26 through 30

                   0                   0                   0                   0                   0

  Columns 31 through 35

                   0                   0                   0                   0                   0

  Columns 36 through 40

                   0                   0                   0                   0                   0

  Columns 41 through 45

                   0                   0                   0                   0                   0

  Columns 46 through 50

                   0                   0                   0                   0                   0

  Columns 51 through 55

                   0                   0                   0                   0                   0

  Columns 56 through 60

                   0                   0                   0                   0                   0

  Column 61

                   0


inner_code_BER =

  Columns 1 through 5

   0.178618472275941   0.175756771893937                   0                   0                   0

  Columns 6 through 10

                   0                   0                   0                   0                   0

  Columns 11 through 15

                   0                   0                   0                   0                   0

  Columns 16 through 20

                   0                   0                   0                   0                   0

  Columns 21 through 25

                   0                   0                   0                   0                   0

  Columns 26 through 30

                   0                   0                   0                   0                   0

  Columns 31 through 35

                   0                   0                   0                   0                   0

  Columns 36 through 40

                   0                   0                   0                   0                   0

  Columns 41 through 45

                   0                   0                   0                   0                   0

  Columns 46 through 50

                   0                   0                   0                   0                   0

  Columns 51 through 55

                   0                   0                   0                   0                   0

  Columns 56 through 60

                   0                   0                   0                   0                   0

  Column 61

                   0


outer_code_BER =

  Columns 1 through 5

   0.178618472275942   0.175756771893938                   0                   0                   0

  Columns 6 through 10

                   0                   0                   0                   0                   0

  Columns 11 through 15

                   0                   0                   0                   0                   0

  Columns 16 through 20

                   0                   0                   0                   0                   0

  Columns 21 through 25

                   0                   0                   0                   0                   0

  Columns 26 through 30

                   0                   0                   0                   0                   0

  Columns 31 through 35

                   0                   0                   0                   0                   0

  Columns 36 through 40

                   0                   0                   0                   0                   0

  Columns 41 through 45

                   0                   0                   0                   0                   0

  Columns 46 through 50

                   0                   0                   0                   0                   0

  Columns 51 through 55

                   0                   0                   0                   0                   0

  Columns 56 through 60

                   0                   0                   0                   0                   0

  Column 61

                   0


inner_code_BER =

  Columns 1 through 5

   0.178618472275941   0.175756771893937   0.172874503078912                   0                   0

  Columns 6 through 10

                   0                   0                   0                   0                   0

  Columns 11 through 15

                   0                   0                   0                   0                   0

  Columns 16 through 20

                   0                   0                   0                   0                   0

  Columns 21 through 25

                   0                   0                   0                   0                   0

  Columns 26 through 30

                   0                   0                   0                   0                   0

  Columns 31 through 35

                   0                   0                   0                   0                   0

  Columns 36 through 40

                   0                   0                   0                   0                   0

  Columns 41 through 45

                   0                   0                   0                   0                   0

  Columns 46 through 50

                   0                   0                   0                   0                   0

  Columns 51 through 55

                   0                   0                   0                   0                   0

  Columns 56 through 60

                   0                   0                   0                   0                   0

  Column 61

                   0


outer_code_BER =

  Columns 1 through 5

   0.178618472275942   0.175756771893938   0.172874503078912                   0                   0

  Columns 6 through 10

                   0                   0                   0                   0                   0

  Columns 11 through 15

                   0                   0                   0                   0                   0

  Columns 16 through 20

                   0                   0                   0                   0                   0

  Columns 21 through 25

                   0                   0                   0                   0                   0

  Columns 26 through 30

                   0                   0                   0                   0                   0

  Columns 31 through 35

                   0                   0                   0                   0                   0

  Columns 36 through 40

                   0                   0                   0                   0                   0

  Columns 41 through 45

                   0                   0                   0                   0                   0

  Columns 46 through 50

                   0                   0                   0                   0                   0

  Columns 51 through 55

                   0                   0                   0                   0                   0

  Columns 56 through 60

                   0                   0                   0                   0                   0

  Column 61

                   0


inner_code_BER =

  Columns 1 through 5

   0.178618472275941   0.175756771893937   0.172874503078912   0.169970190484945                   0

  Columns 6 through 10

                   0                   0                   0                   0                   0

  Columns 11 through 15

                   0                   0                   0                   0                   0

  Columns 16 through 20

                   0                   0                   0                   0                   0

  Columns 21 through 25

                   0                   0                   0                   0                   0

  Columns 26 through 30

                   0                   0                   0                   0                   0

  Columns 31 through 35

                   0                   0                   0                   0                   0

  Columns 36 through 40

                   0                   0                   0                   0                   0

  Columns 41 through 45

                   0                   0                   0                   0                   0

  Columns 46 through 50

                   0                   0                   0                   0                   0

  Columns 51 through 55

                   0                   0                   0                   0                   0

  Columns 56 through 60

                   0                   0                   0                   0                   0

  Column 61

                   0


outer_code_BER =

  Columns 1 through 5

   0.178618472275942   0.175756771893938   0.172874503078912   0.169970190484946                   0

  Columns 6 through 10

                   0                   0                   0                   0                   0

  Columns 11 through 15

                   0                   0                   0                   0                   0

  Columns 16 through 20

                   0                   0                   0                   0                   0

  Columns 21 through 25

                   0                   0                   0                   0                   0

  Columns 26 through 30

                   0                   0                   0                   0                   0

  Columns 31 through 35

                   0                   0                   0                   0                   0

  Columns 36 through 40

                   0                   0                   0                   0                   0

  Columns 41 through 45

                   0                   0                   0                   0                   0

  Columns 46 through 50

                   0                   0                   0                   0                   0

  Columns 51 through 55

                   0                   0                   0                   0                   0

  Columns 56 through 60

                   0                   0                   0                   0                   0

  Column 61

                   0


inner_code_BER =

  Columns 1 through 5

   0.178618472275941   0.175756771893937   0.172874503078912   0.169970190484945   0.167042151571198

  Columns 6 through 10

                   0                   0                   0                   0                   0

  Columns 11 through 15

                   0                   0                   0                   0                   0

  Columns 16 through 20

                   0                   0                   0                   0                   0

  Columns 21 through 25

                   0                   0                   0                   0                   0

  Columns 26 through 30

                   0                   0                   0                   0                   0

  Columns 31 through 35

                   0                   0                   0                   0                   0

  Columns 36 through 40

                   0                   0                   0                   0                   0

  Columns 41 through 45

                   0                   0                   0                   0                   0

  Columns 46 through 50

                   0                   0                   0                   0                   0

  Columns 51 through 55

                   0                   0                   0                   0                   0

  Columns 56 through 60

                   0                   0                   0                   0                   0

  Column 61

                   0


outer_code_BER =

  Columns 1 through 5

   0.178618472275942   0.175756771893938   0.172874503078912   0.169970190484946   0.167042151571197

  Columns 6 through 10

                   0                   0                   0                   0                   0

  Columns 11 through 15

                   0                   0                   0                   0                   0

  Columns 16 through 20

                   0                   0                   0                   0                   0

  Columns 21 through 25

                   0                   0                   0                   0                   0

  Columns 26 through 30

                   0                   0                   0                   0                   0

  Columns 31 through 35

                   0                   0                   0                   0                   0

  Columns 36 through 40

                   0                   0                   0                   0                   0

  Columns 41 through 45

                   0                   0                   0                   0                   0

  Columns 46 through 50

                   0                   0                   0                   0                   0

  Columns 51 through 55

                   0                   0                   0                   0                   0

  Columns 56 through 60

                   0                   0                   0                   0                   0

  Column 61

                   0


inner_code_BER =

  Columns 1 through 5

   0.178618472275941   0.175756771893937   0.172874503078912   0.169970190484945   0.167042151571198

  Columns 6 through 10

   0.164088466907412                   0                   0                   0                   0

  Columns 11 through 15

                   0                   0                   0                   0                   0

  Columns 16 through 20

                   0                   0                   0                   0                   0

  Columns 21 through 25

                   0                   0                   0                   0                   0

  Columns 26 through 30

                   0                   0                   0                   0                   0

  Columns 31 through 35

                   0                   0                   0                   0                   0

  Columns 36 through 40

                   0                   0                   0                   0                   0

  Columns 41 through 45

                   0                   0                   0                   0                   0

  Columns 46 through 50

                   0                   0                   0                   0                   0

  Columns 51 through 55

                   0                   0                   0                   0                   0

  Columns 56 through 60

                   0                   0                   0                   0                   0

  Column 61

                   0


outer_code_BER =

  Columns 1 through 5

   0.178618472275942   0.175756771893938   0.172874503078912   0.169970190484946   0.167042151571197

  Columns 6 through 10

   0.164088466907412                   0                   0                   0                   0

  Columns 11 through 15

                   0                   0                   0                   0                   0

  Columns 16 through 20

                   0                   0                   0                   0                   0

  Columns 21 through 25

                   0                   0                   0                   0                   0

  Columns 26 through 30

                   0                   0                   0                   0                   0

  Columns 31 through 35

                   0                   0                   0                   0                   0

  Columns 36 through 40

                   0                   0                   0                   0                   0

  Columns 41 through 45

                   0                   0                   0                   0                   0

  Columns 46 through 50

                   0                   0                   0                   0                   0

  Columns 51 through 55

                   0                   0                   0                   0                   0

  Columns 56 through 60

                   0                   0                   0                   0                   0

  Column 61

                   0


inner_code_BER =

  Columns 1 through 5

   0.178618472275941   0.175756771893937   0.172874503078912   0.169970190484945   0.167042151571198

  Columns 6 through 10

   0.164088466907412   0.161106944448430                   0                   0                   0

  Columns 11 through 15

                   0                   0                   0                   0                   0

  Columns 16 through 20

                   0                   0                   0                   0                   0

  Columns 21 through 25

                   0                   0                   0                   0                   0

  Columns 26 through 30

                   0                   0                   0                   0                   0

  Columns 31 through 35

                   0                   0                   0                   0                   0

  Columns 36 through 40

                   0                   0                   0                   0                   0

  Columns 41 through 45

                   0                   0                   0                   0                   0

  Columns 46 through 50

                   0                   0                   0                   0                   0

  Columns 51 through 55

                   0                   0                   0                   0                   0

  Columns 56 through 60

                   0                   0                   0                   0                   0

  Column 61

                   0


outer_code_BER =

  Columns 1 through 5

   0.178618472275942   0.175756771893938   0.172874503078912   0.169970190484946   0.167042151571197

  Columns 6 through 10

   0.164088466907412   0.161106944448430                   0                   0                   0

  Columns 11 through 15

                   0                   0                   0                   0                   0

  Columns 16 through 20

                   0                   0                   0                   0                   0

  Columns 21 through 25

                   0                   0                   0                   0                   0

  Columns 26 through 30

                   0                   0                   0                   0                   0

  Columns 31 through 35

                   0                   0                   0                   0                   0

  Columns 36 through 40

                   0                   0                   0                   0                   0

  Columns 41 through 45

                   0                   0                   0                   0                   0

  Columns 46 through 50

                   0                   0                   0                   0                   0

  Columns 51 through 55

                   0                   0                   0                   0                   0

  Columns 56 through 60

                   0                   0                   0                   0                   0

  Column 61

                   0


inner_code_BER =

  Columns 1 through 5

   0.178618472275941   0.175756771893937   0.172874503078912   0.169970190484945   0.167042151571198

  Columns 6 through 10

   0.164088466907412   0.161106944448430   0.158095076167206                   0                   0

  Columns 11 through 15

                   0                   0                   0                   0                   0

  Columns 16 through 20

                   0                   0                   0                   0                   0

  Columns 21 through 25

                   0                   0                   0                   0                   0

  Columns 26 through 30

                   0                   0                   0                   0                   0

  Columns 31 through 35

                   0                   0                   0                   0                   0

  Columns 36 through 40

                   0                   0                   0                   0                   0

  Columns 41 through 45

                   0                   0                   0                   0                   0

  Columns 46 through 50

                   0                   0                   0                   0                   0

  Columns 51 through 55

                   0                   0                   0                   0                   0

  Columns 56 through 60

                   0                   0                   0                   0                   0

  Column 61

                   0


outer_code_BER =

  Columns 1 through 5

   0.178618472275942   0.175756771893938   0.172874503078912   0.169970190484946   0.167042151571197

  Columns 6 through 10

   0.164088466907412   0.161106944448430   0.158095076167206                   0                   0

  Columns 11 through 15

                   0                   0                   0                   0                   0

  Columns 16 through 20

                   0                   0                   0                   0                   0

  Columns 21 through 25

                   0                   0                   0                   0                   0

  Columns 26 through 30

                   0                   0                   0                   0                   0

  Columns 31 through 35

                   0                   0                   0                   0                   0

  Columns 36 through 40

                   0                   0                   0                   0                   0

  Columns 41 through 45

                   0                   0                   0                   0                   0

  Columns 46 through 50

                   0                   0                   0                   0                   0

  Columns 51 through 55

                   0                   0                   0                   0                   0

  Columns 56 through 60

                   0                   0                   0                   0                   0

  Column 61

                   0


inner_code_BER =

  Columns 1 through 5

   0.178618472275941   0.175756771893937   0.172874503078912   0.169970190484945   0.167042151571198

  Columns 6 through 10

   0.164088466907412   0.161106944448430   0.158095076167206   0.155049984911914                   0

  Columns 11 through 15

                   0                   0                   0                   0                   0

  Columns 16 through 20

                   0                   0                   0                   0                   0

  Columns 21 through 25

                   0                   0                   0                   0                   0

  Columns 26 through 30

                   0                   0                   0                   0                   0

  Columns 31 through 35

                   0                   0                   0                   0                   0

  Columns 36 through 40

                   0                   0                   0                   0                   0

  Columns 41 through 45

                   0                   0                   0                   0                   0

  Columns 46 through 50

                   0                   0                   0                   0                   0

  Columns 51 through 55

                   0                   0                   0                   0                   0

  Columns 56 through 60

                   0                   0                   0                   0                   0

  Column 61

                   0


outer_code_BER =

  Columns 1 through 5

   0.178618472275942   0.175756771893938   0.172874503078912   0.169970190484946   0.167042151571197

  Columns 6 through 10

   0.164088466907412   0.161106944448430   0.158095076167206   0.155049984911914                   0

  Columns 11 through 15

                   0                   0                   0                   0                   0

  Columns 16 through 20

                   0                   0                   0                   0                   0

  Columns 21 through 25

                   0                   0                   0                   0                   0

  Columns 26 through 30

                   0                   0                   0                   0                   0

  Columns 31 through 35

                   0                   0                   0                   0                   0

  Columns 36 through 40

                   0                   0                   0                   0                   0

  Columns 41 through 45

                   0                   0                   0                   0                   0

  Columns 46 through 50

                   0                   0                   0                   0                   0

  Columns 51 through 55

                   0                   0                   0                   0                   0

  Columns 56 through 60

                   0                   0                   0                   0                   0

  Column 61

                   0


inner_code_BER =

  Columns 1 through 5

   0.178618472275941   0.175756771893937   0.172874503078912   0.169970190484945   0.167042151571198

  Columns 6 through 10

   0.164088466907412   0.161106944448430   0.158095076167206   0.155049984911914   0.151968358622768

  Columns 11 through 15

                   0                   0                   0                   0                   0

  Columns 16 through 20

                   0                   0                   0                   0                   0

  Columns 21 through 25

                   0                   0                   0                   0                   0

  Columns 26 through 30

                   0                   0                   0                   0                   0

  Columns 31 through 35

                   0                   0                   0                   0                   0

  Columns 36 through 40

                   0                   0                   0                   0                   0

  Columns 41 through 45

                   0                   0                   0                   0                   0

  Columns 46 through 50

                   0                   0                   0                   0                   0

  Columns 51 through 55

                   0                   0                   0                   0                   0

  Columns 56 through 60

                   0                   0                   0                   0                   0

  Column 61

                   0


outer_code_BER =

  Columns 1 through 5

   0.178618472275942   0.175756771893938   0.172874503078912   0.169970190484946   0.167042151571197

  Columns 6 through 10

   0.164088466907412   0.161106944448430   0.158095076167206   0.155049984911914   0.151968358622768

  Columns 11 through 15

                   0                   0                   0                   0                   0

  Columns 16 through 20

                   0                   0                   0                   0                   0

  Columns 21 through 25

                   0                   0                   0                   0                   0

  Columns 26 through 30

                   0                   0                   0                   0                   0

  Columns 31 through 35

                   0                   0                   0                   0                   0

  Columns 36 through 40

                   0                   0                   0                   0                   0

  Columns 41 through 45

                   0                   0                   0                   0                   0

  Columns 46 through 50

                   0                   0                   0                   0                   0

  Columns 51 through 55

                   0                   0                   0                   0                   0

  Columns 56 through 60

                   0                   0                   0                   0                   0

  Column 61

                   0


inner_code_BER =

  Columns 1 through 5

   0.178618472275941   0.175756771893937   0.172874503078912   0.169970190484945   0.167042151571198

  Columns 6 through 10

   0.164088466907412   0.161106944448430   0.158095076167206   0.155049984911914   0.151968358622768

  Columns 11 through 15

   0.148846368010973                   0                   0                   0                   0

  Columns 16 through 20

                   0                   0                   0                   0                   0

  Columns 21 through 25

                   0                   0                   0                   0                   0

  Columns 26 through 30

                   0                   0                   0                   0                   0

  Columns 31 through 35

                   0                   0                   0                   0                   0

  Columns 36 through 40

                   0                   0                   0                   0                   0

  Columns 41 through 45

                   0                   0                   0                   0                   0

  Columns 46 through 50

                   0                   0                   0                   0                   0

  Columns 51 through 55

                   0                   0                   0                   0                   0

  Columns 56 through 60

                   0                   0                   0                   0                   0

  Column 61

                   0


outer_code_BER =

  Columns 1 through 5

   0.178618472275942   0.175756771893938   0.172874503078912   0.169970190484946   0.167042151571197

  Columns 6 through 10

   0.164088466907412   0.161106944448430   0.158095076167206   0.155049984911914   0.151968358622768

  Columns 11 through 15

   0.148846368010973                   0                   0                   0                   0

  Columns 16 through 20

                   0                   0                   0                   0                   0

  Columns 21 through 25

                   0                   0                   0                   0                   0

  Columns 26 through 30

                   0                   0                   0                   0                   0

  Columns 31 through 35

                   0                   0                   0                   0                   0

  Columns 36 through 40

                   0                   0                   0                   0                   0

  Columns 41 through 45

                   0                   0                   0                   0                   0

  Columns 46 through 50

                   0                   0                   0                   0                   0

  Columns 51 through 55

                   0                   0                   0                   0                   0

  Columns 56 through 60

                   0                   0                   0                   0                   0

  Column 61

                   0


inner_code_BER =

  Columns 1 through 5

   0.178618472275941   0.175756771893937   0.172874503078912   0.169970190484945   0.167042151571198

  Columns 6 through 10

   0.164088466907412   0.161106944448430   0.158095076167206   0.155049984911914   0.151968358622768

  Columns 11 through 15

   0.148846368010973   0.145679562314755                   0                   0                   0

  Columns 16 through 20

                   0                   0                   0                   0                   0

  Columns 21 through 25

                   0                   0                   0                   0                   0

  Columns 26 through 30

                   0                   0                   0                   0                   0

  Columns 31 through 35

                   0                   0                   0                   0                   0

  Columns 36 through 40

                   0                   0                   0                   0                   0

  Columns 41 through 45

                   0                   0                   0                   0                   0

  Columns 46 through 50

                   0                   0                   0                   0                   0

  Columns 51 through 55

                   0                   0                   0                   0                   0

  Columns 56 through 60

                   0                   0                   0                   0                   0

  Column 61

                   0


outer_code_BER =

  Columns 1 through 5

   0.178618472275942   0.175756771893938   0.172874503078912   0.169970190484946   0.167042151571197

  Columns 6 through 10

   0.164088466907412   0.161106944448430   0.158095076167206   0.155049984911914   0.151968358622768

  Columns 11 through 15

   0.148846368010973   0.145679562314756                   0                   0                   0

  Columns 16 through 20

                   0                   0                   0                   0                   0

  Columns 21 through 25

                   0                   0                   0                   0                   0

  Columns 26 through 30

                   0                   0                   0                   0                   0

  Columns 31 through 35

                   0                   0                   0                   0                   0

  Columns 36 through 40

                   0                   0                   0                   0                   0

  Columns 41 through 45

                   0                   0                   0                   0                   0

  Columns 46 through 50

                   0                   0                   0                   0                   0

  Columns 51 through 55

                   0                   0                   0                   0                   0

  Columns 56 through 60

                   0                   0                   0                   0                   0

  Column 61

                   0


inner_code_BER =

  Columns 1 through 5

   0.178618472275941   0.175756771893937   0.172874503078912   0.169970190484945   0.167042151571198

  Columns 6 through 10

   0.164088466907412   0.161106944448430   0.158095076167206   0.155049984911914   0.151968358622768

  Columns 11 through 15

   0.148846368010973   0.145679562314755   0.142462735565477                   0                   0

  Columns 16 through 20

                   0                   0                   0                   0                   0

  Columns 21 through 25

                   0                   0                   0                   0                   0

  Columns 26 through 30

                   0                   0                   0                   0                   0

  Columns 31 through 35

                   0                   0                   0                   0                   0

  Columns 36 through 40

                   0                   0                   0                   0                   0

  Columns 41 through 45

                   0                   0                   0                   0                   0

  Columns 46 through 50

                   0                   0                   0                   0                   0

  Columns 51 through 55

                   0                   0                   0                   0                   0

  Columns 56 through 60

                   0                   0                   0                   0                   0

  Column 61

                   0


outer_code_BER =

  Columns 1 through 5

   0.178618472275942   0.175756771893938   0.172874503078912   0.169970190484946   0.167042151571197

  Columns 6 through 10

   0.164088466907412   0.161106944448430   0.158095076167206   0.155049984911914   0.151968358622768

  Columns 11 through 15

   0.148846368010973   0.145679562314756   0.142462735565476                   0                   0

  Columns 16 through 20

                   0                   0                   0                   0                   0

  Columns 21 through 25

                   0                   0                   0                   0                   0

  Columns 26 through 30

                   0                   0                   0                   0                   0

  Columns 31 through 35

                   0                   0                   0                   0                   0

  Columns 36 through 40

                   0                   0                   0                   0                   0

  Columns 41 through 45

                   0                   0                   0                   0                   0

  Columns 46 through 50

                   0                   0                   0                   0                   0

  Columns 51 through 55

                   0                   0                   0                   0                   0

  Columns 56 through 60

                   0                   0                   0                   0                   0

  Column 61

                   0


inner_code_BER =

  Columns 1 through 5

   0.178618472275941   0.175756771893937   0.172874503078912   0.169970190484945   0.167042151571198

  Columns 6 through 10

   0.164088466907412   0.161106944448430   0.158095076167206   0.155049984911914   0.151968358622768

  Columns 11 through 15

   0.148846368010973   0.145679562314755   0.142462735565477   0.139189752529021                   0

  Columns 16 through 20

                   0                   0                   0                   0                   0

  Columns 21 through 25

                   0                   0                   0                   0                   0

  Columns 26 through 30

                   0                   0                   0                   0                   0

  Columns 31 through 35

                   0                   0                   0                   0                   0

  Columns 36 through 40

                   0                   0                   0                   0                   0

  Columns 41 through 45

                   0                   0                   0                   0                   0

  Columns 46 through 50

                   0                   0                   0                   0                   0

  Columns 51 through 55

                   0                   0                   0                   0                   0

  Columns 56 through 60

                   0                   0                   0                   0                   0

  Column 61

                   0


outer_code_BER =

  Columns 1 through 5

   0.178618472275942   0.175756771893938   0.172874503078912   0.169970190484946   0.167042151571197

  Columns 6 through 10

   0.164088466907412   0.161106944448430   0.158095076167206   0.155049984911914   0.151968358622768

  Columns 11 through 15

   0.148846368010973   0.145679562314756   0.142462735565476   0.139189752529022                   0

  Columns 16 through 20

                   0                   0                   0                   0                   0

  Columns 21 through 25

                   0                   0                   0                   0                   0

  Columns 26 through 30

                   0                   0                   0                   0                   0

  Columns 31 through 35

                   0                   0                   0                   0                   0

  Columns 36 through 40

                   0                   0                   0                   0                   0

  Columns 41 through 45

                   0                   0                   0                   0                   0

  Columns 46 through 50

                   0                   0                   0                   0                   0

  Columns 51 through 55

                   0                   0                   0                   0                   0

  Columns 56 through 60

                   0                   0                   0                   0                   0

  Column 61

                   0


inner_code_BER =

  Columns 1 through 5

   0.178618472275941   0.175756771893937   0.172874503078912   0.169970190484945   0.167042151571198

  Columns 6 through 10

   0.164088466907412   0.161106944448430   0.158095076167206   0.155049984911914   0.151968358622768

  Columns 11 through 15

   0.148846368010973   0.145679562314755   0.142462735565477   0.139189752529021   0.135853318478615

  Columns 16 through 20

                   0                   0                   0                   0                   0

  Columns 21 through 25

                   0                   0                   0                   0                   0

  Columns 26 through 30

                   0                   0                   0                   0                   0

  Columns 31 through 35

                   0                   0                   0                   0                   0

  Columns 36 through 40

                   0                   0                   0                   0                   0

  Columns 41 through 45

                   0                   0                   0                   0                   0

  Columns 46 through 50

                   0                   0                   0                   0                   0

  Columns 51 through 55

                   0                   0                   0                   0                   0

  Columns 56 through 60

                   0                   0                   0                   0                   0

  Column 61

                   0


outer_code_BER =

  Columns 1 through 5

   0.178618472275942   0.175756771893938   0.172874503078912   0.169970190484946   0.167042151571197

  Columns 6 through 10

   0.164088466907412   0.161106944448430   0.158095076167206   0.155049984911914   0.151968358622768

  Columns 11 through 15

   0.148846368010973   0.145679562314756   0.142462735565476   0.139189752529022   0.135853318478615

  Columns 16 through 20

                   0                   0                   0                   0                   0

  Columns 21 through 25

                   0                   0                   0                   0                   0

  Columns 26 through 30

                   0                   0                   0                   0                   0

  Columns 31 through 35

                   0                   0                   0                   0                   0

  Columns 36 through 40

                   0                   0                   0                   0                   0

  Columns 41 through 45

                   0                   0                   0                   0                   0

  Columns 46 through 50

                   0                   0                   0                   0                   0

  Columns 51 through 55

                   0                   0                   0                   0                   0

  Columns 56 through 60

                   0                   0                   0                   0                   0

  Column 61

                   0


inner_code_BER =

  Columns 1 through 5

   0.178618472275941   0.175756771893937   0.172874503078912   0.169970190484945   0.167042151571198

  Columns 6 through 10

   0.164088466907412   0.161106944448430   0.158095076167206   0.155049984911914   0.151968358622768

  Columns 11 through 15

   0.148846368010973   0.145679562314755   0.142462735565477   0.139189752529021   0.135853318478615

  Columns 16 through 20

   0.132444669074878                   0                   0                   0                   0

  Columns 21 through 25

                   0                   0                   0                   0                   0

  Columns 26 through 30

                   0                   0                   0                   0                   0

  Columns 31 through 35

                   0                   0                   0                   0                   0

  Columns 36 through 40

                   0                   0                   0                   0                   0

  Columns 41 through 45

                   0                   0                   0                   0                   0

  Columns 46 through 50

                   0                   0                   0                   0                   0

  Columns 51 through 55

                   0                   0                   0                   0                   0

  Columns 56 through 60

                   0                   0                   0                   0                   0

  Column 61

                   0


outer_code_BER =

  Columns 1 through 5

   0.178618472275942   0.175756771893938   0.172874503078912   0.169970190484946   0.167042151571197

  Columns 6 through 10

   0.164088466907412   0.161106944448430   0.158095076167206   0.155049984911914   0.151968358622768

  Columns 11 through 15

   0.148846368010973   0.145679562314756   0.142462735565476   0.139189752529022   0.135853318478615

  Columns 16 through 20

   0.132444669074878                   0                   0                   0                   0

  Columns 21 through 25

                   0                   0                   0                   0                   0

  Columns 26 through 30

                   0                   0                   0                   0                   0

  Columns 31 through 35

                   0                   0                   0                   0                   0

  Columns 36 through 40

                   0                   0                   0                   0                   0

  Columns 41 through 45

                   0                   0                   0                   0                   0

  Columns 46 through 50

                   0                   0                   0                   0                   0

  Columns 51 through 55

                   0                   0                   0                   0                   0

  Columns 56 through 60

                   0                   0                   0                   0                   0

  Column 61

                   0


inner_code_BER =

  Columns 1 through 5

   0.178618472275941   0.175756771893937   0.172874503078912   0.169970190484945   0.167042151571198

  Columns 6 through 10

   0.164088466907412   0.161106944448430   0.158095076167206   0.155049984911914   0.151968358622768

  Columns 11 through 15

   0.148846368010973   0.145679562314755   0.142462735565477   0.139189752529021   0.135853318478615

  Columns 16 through 20

   0.132444669074878   0.128953143859587                   0                   0                   0

  Columns 21 through 25

                   0                   0                   0                   0                   0

  Columns 26 through 30

                   0                   0                   0                   0                   0

  Columns 31 through 35

                   0                   0                   0                   0                   0

  Columns 36 through 40

                   0                   0                   0                   0                   0

  Columns 41 through 45

                   0                   0                   0                   0                   0

  Columns 46 through 50

                   0                   0                   0                   0                   0

  Columns 51 through 55

                   0                   0                   0                   0                   0

  Columns 56 through 60

                   0                   0                   0                   0                   0

  Column 61

                   0


outer_code_BER =

  Columns 1 through 5

   0.178618472275942   0.175756771893938   0.172874503078912   0.169970190484946   0.167042151571197

  Columns 6 through 10

   0.164088466907412   0.161106944448430   0.158095076167206   0.155049984911914   0.151968358622768

  Columns 11 through 15

   0.148846368010973   0.145679562314756   0.142462735565476   0.139189752529022   0.135853318478615

  Columns 16 through 20

   0.132444669074878   0.128953143859587                   0                   0                   0

  Columns 21 through 25

                   0                   0                   0                   0                   0

  Columns 26 through 30

                   0                   0                   0                   0                   0

  Columns 31 through 35

                   0                   0                   0                   0                   0

  Columns 36 through 40

                   0                   0                   0                   0                   0

  Columns 41 through 45

                   0                   0                   0                   0                   0

  Columns 46 through 50

                   0                   0                   0                   0                   0

  Columns 51 through 55

                   0                   0                   0                   0                   0

  Columns 56 through 60

                   0                   0                   0                   0                   0

  Column 61

                   0


inner_code_BER =

  Columns 1 through 5

   0.178618472275941   0.175756771893937   0.172874503078912   0.169970190484945   0.167042151571198

  Columns 6 through 10

   0.164088466907412   0.161106944448430   0.158095076167206   0.155049984911914   0.151968358622768

  Columns 11 through 15

   0.148846368010973   0.145679562314755   0.142462735565477   0.139189752529021   0.135853318478615

  Columns 16 through 20

   0.132444669074878   0.128953143859587   0.125365585468748                   0                   0

  Columns 21 through 25

                   0                   0                   0                   0                   0

  Columns 26 through 30

                   0                   0                   0                   0                   0

  Columns 31 through 35

                   0                   0                   0                   0                   0

  Columns 36 through 40

                   0                   0                   0                   0                   0

  Columns 41 through 45

                   0                   0                   0                   0                   0

  Columns 46 through 50

                   0                   0                   0                   0                   0

  Columns 51 through 55

                   0                   0                   0                   0                   0

  Columns 56 through 60

                   0                   0                   0                   0                   0

  Column 61

                   0


outer_code_BER =

  Columns 1 through 5

   0.178618472275942   0.175756771893938   0.172874503078912   0.169970190484946   0.167042151571197

  Columns 6 through 10

   0.164088466907412   0.161106944448430   0.158095076167206   0.155049984911914   0.151968358622768

  Columns 11 through 15

   0.148846368010973   0.145679562314756   0.142462735565476   0.139189752529022   0.135853318478615

  Columns 16 through 20

   0.132444669074878   0.128953143859587   0.125365585468748                   0                   0

  Columns 21 through 25

                   0                   0                   0                   0                   0

  Columns 26 through 30

                   0                   0                   0                   0                   0

  Columns 31 through 35

                   0                   0                   0                   0                   0

  Columns 36 through 40

                   0                   0                   0                   0                   0

  Columns 41 through 45

                   0                   0                   0                   0                   0

  Columns 46 through 50

                   0                   0                   0                   0                   0

  Columns 51 through 55

                   0                   0                   0                   0                   0

  Columns 56 through 60

                   0                   0                   0                   0                   0

  Column 61

                   0


inner_code_BER =

  Columns 1 through 5

   0.178618472275941   0.175756771893937   0.172874503078912   0.169970190484945   0.167042151571198

  Columns 6 through 10

   0.164088466907412   0.161106944448430   0.158095076167206   0.155049984911914   0.151968358622768

  Columns 11 through 15

   0.148846368010973   0.145679562314755   0.142462735565477   0.139189752529021   0.135853318478615

  Columns 16 through 20

   0.132444669074878   0.128953143859587   0.125365585468748   0.121665469378016                   0

  Columns 21 through 25

                   0                   0                   0                   0                   0

  Columns 26 through 30

                   0                   0                   0                   0                   0

  Columns 31 through 35

                   0                   0                   0                   0                   0

  Columns 36 through 40

                   0                   0                   0                   0                   0

  Columns 41 through 45

                   0                   0                   0                   0                   0

  Columns 46 through 50

                   0                   0                   0                   0                   0

  Columns 51 through 55

                   0                   0                   0                   0                   0

  Columns 56 through 60

                   0                   0                   0                   0                   0

  Column 61

                   0


outer_code_BER =

  Columns 1 through 5

   0.178618472275942   0.175756771893938   0.172874503078912   0.169970190484946   0.167042151571197

  Columns 6 through 10

   0.164088466907412   0.161106944448430   0.158095076167206   0.155049984911914   0.151968358622768

  Columns 11 through 15

   0.148846368010973   0.145679562314756   0.142462735565476   0.139189752529022   0.135853318478615

  Columns 16 through 20

   0.132444669074878   0.128953143859587   0.125365585468748   0.121665469378017                   0

  Columns 21 through 25

                   0                   0                   0                   0                   0

  Columns 26 through 30

                   0                   0                   0                   0                   0

  Columns 31 through 35

                   0                   0                   0                   0                   0

  Columns 36 through 40

                   0                   0                   0                   0                   0

  Columns 41 through 45

                   0                   0                   0                   0                   0

  Columns 46 through 50

                   0                   0                   0                   0                   0

  Columns 51 through 55

                   0                   0                   0                   0                   0

  Columns 56 through 60

                   0                   0                   0                   0                   0

  Column 61

                   0


inner_code_BER =

  Columns 1 through 5

   0.178618472275941   0.175756771893937   0.172874503078912   0.169970190484945   0.167042151571198

  Columns 6 through 10

   0.164088466907412   0.161106944448430   0.158095076167206   0.155049984911914   0.151968358622768

  Columns 11 through 15

   0.148846368010973   0.145679562314755   0.142462735565477   0.139189752529021   0.135853318478615

  Columns 16 through 20

   0.132444669074878   0.128953143859587   0.125365585468748   0.121665469378016   0.117831600977850

  Columns 21 through 25

                   0                   0                   0                   0                   0

  Columns 26 through 30

                   0                   0                   0                   0                   0

  Columns 31 through 35

                   0                   0                   0                   0                   0

  Columns 36 through 40

                   0                   0                   0                   0                   0

  Columns 41 through 45

                   0                   0                   0                   0                   0

  Columns 46 through 50

                   0                   0                   0                   0                   0

  Columns 51 through 55

                   0                   0                   0                   0                   0

  Columns 56 through 60

                   0                   0                   0                   0                   0

  Column 61

                   0


outer_code_BER =

  Columns 1 through 5

   0.178618472275942   0.175756771893938   0.172874503078912   0.169970190484946   0.167042151571197

  Columns 6 through 10

   0.164088466907412   0.161106944448430   0.158095076167206   0.155049984911914   0.151968358622768

  Columns 11 through 15

   0.148846368010973   0.145679562314756   0.142462735565476   0.139189752529022   0.135853318478615

  Columns 16 through 20

   0.132444669074878   0.128953143859587   0.125365585468748   0.121665469378017   0.117831600977850

  Columns 21 through 25

                   0                   0                   0                   0                   0

  Columns 26 through 30

                   0                   0                   0                   0                   0

  Columns 31 through 35

                   0                   0                   0                   0                   0

  Columns 36 through 40

                   0                   0                   0                   0                   0

  Columns 41 through 45

                   0                   0                   0                   0                   0

  Columns 46 through 50

                   0                   0                   0                   0                   0

  Columns 51 through 55

                   0                   0                   0                   0                   0

  Columns 56 through 60

                   0                   0                   0                   0                   0

  Column 61

                   0


inner_code_BER =

  Columns 1 through 5

   0.178618472275941   0.175756771893937   0.172874503078912   0.169970190484945   0.167042151571198

  Columns 6 through 10

   0.164088466907412   0.161106944448430   0.158095076167206   0.155049984911914   0.151968358622768

  Columns 11 through 15

   0.148846368010973   0.145679562314755   0.142462735565477   0.139189752529021   0.135853318478615

  Columns 16 through 20

   0.132444669074878   0.128953143859587   0.125365585468748   0.121665469378016   0.117831600977850

  Columns 21 through 25

   0.113836085829665                   0                   0                   0                   0

  Columns 26 through 30

                   0                   0                   0                   0                   0

  Columns 31 through 35

                   0                   0                   0                   0                   0

  Columns 36 through 40

                   0                   0                   0                   0                   0

  Columns 41 through 45

                   0                   0                   0                   0                   0

  Columns 46 through 50

                   0                   0                   0                   0                   0

  Columns 51 through 55

                   0                   0                   0                   0                   0

  Columns 56 through 60

                   0                   0                   0                   0                   0

  Column 61

                   0


outer_code_BER =

  Columns 1 through 5

   0.178618472275942   0.175756771893938   0.172874503078912   0.169970190484946   0.167042151571197

  Columns 6 through 10

   0.164088466907412   0.161106944448430   0.158095076167206   0.155049984911914   0.151968358622768

  Columns 11 through 15

   0.148846368010973   0.145679562314756   0.142462735565476   0.139189752529022   0.135853318478615

  Columns 16 through 20

   0.132444669074878   0.128953143859587   0.125365585468748   0.121665469378017   0.117831600977850

  Columns 21 through 25

   0.113836085829665                   0                   0                   0                   0

  Columns 26 through 30

                   0                   0                   0                   0                   0

  Columns 31 through 35

                   0                   0                   0                   0                   0

  Columns 36 through 40

                   0                   0                   0                   0                   0

  Columns 41 through 45

                   0                   0                   0                   0                   0

  Columns 46 through 50

                   0                   0                   0                   0                   0

  Columns 51 through 55

                   0                   0                   0                   0                   0

  Columns 56 through 60

                   0                   0                   0                   0                   0

  Column 61

                   0


inner_code_BER =

  Columns 1 through 5

   0.178618472275941   0.175756771893937   0.172874503078912   0.169970190484945   0.167042151571198

  Columns 6 through 10

   0.164088466907412   0.161106944448430   0.158095076167206   0.155049984911914   0.151968358622768

  Columns 11 through 15

   0.148846368010973   0.145679562314755   0.142462735565477   0.139189752529021   0.135853318478615

  Columns 16 through 20

   0.132444669074878   0.128953143859587   0.125365585468748   0.121665469378016   0.117831600977850

  Columns 21 through 25

   0.113836085829665   0.109641009809692                   0                   0                   0

  Columns 26 through 30

                   0                   0                   0                   0                   0

  Columns 31 through 35

                   0                   0                   0                   0                   0

  Columns 36 through 40

                   0                   0                   0                   0                   0

  Columns 41 through 45

                   0                   0                   0                   0                   0

  Columns 46 through 50

                   0                   0                   0                   0                   0

  Columns 51 through 55

                   0                   0                   0                   0                   0

  Columns 56 through 60

                   0                   0                   0                   0                   0

  Column 61

                   0


outer_code_BER =

  Columns 1 through 5

   0.178618472275942   0.175756771893938   0.172874503078912   0.169970190484946   0.167042151571197

  Columns 6 through 10

   0.164088466907412   0.161106944448430   0.158095076167206   0.155049984911914   0.151968358622768

  Columns 11 through 15

   0.148846368010973   0.145679562314756   0.142462735565476   0.139189752529022   0.135853318478615

  Columns 16 through 20

   0.132444669074878   0.128953143859587   0.125365585468748   0.121665469378017   0.117831600977850

  Columns 21 through 25

   0.113836085829665   0.109641009809692                   0                   0                   0

  Columns 26 through 30

                   0                   0                   0                   0                   0

  Columns 31 through 35

                   0                   0                   0                   0                   0

  Columns 36 through 40

                   0                   0                   0                   0                   0

  Columns 41 through 45

                   0                   0                   0                   0                   0

  Columns 46 through 50

                   0                   0                   0                   0                   0

  Columns 51 through 55

                   0                   0                   0                   0                   0

  Columns 56 through 60

                   0                   0                   0                   0                   0

  Column 61

                   0


inner_code_BER =

  Columns 1 through 5

   0.178618472275941   0.175756771893937   0.172874503078912   0.169970190484945   0.167042151571198

  Columns 6 through 10

   0.164088466907412   0.161106944448430   0.158095076167206   0.155049984911914   0.151968358622768

  Columns 11 through 15

   0.148846368010973   0.145679562314755   0.142462735565477   0.139189752529021   0.135853318478615

  Columns 16 through 20

   0.132444669074878   0.128953143859587   0.125365585468748   0.121665469378016   0.117831600977850

  Columns 21 through 25

   0.113836085829665   0.109641009809692   0.105192666024702                   0                   0

  Columns 26 through 30

                   0                   0                   0                   0                   0

  Columns 31 through 35

                   0                   0                   0                   0                   0

  Columns 36 through 40

                   0                   0                   0                   0                   0

  Columns 41 through 45

                   0                   0                   0                   0                   0

  Columns 46 through 50

                   0                   0                   0                   0                   0

  Columns 51 through 55

                   0                   0                   0                   0                   0

  Columns 56 through 60

                   0                   0                   0                   0                   0

  Column 61

                   0


outer_code_BER =

  Columns 1 through 5

   0.178618472275942   0.175756771893938   0.172874503078912   0.169970190484946   0.167042151571197

  Columns 6 through 10

   0.164088466907412   0.161106944448430   0.158095076167206   0.155049984911914   0.151968358622768

  Columns 11 through 15

   0.148846368010973   0.145679562314756   0.142462735565476   0.139189752529022   0.135853318478615

  Columns 16 through 20

   0.132444669074878   0.128953143859587   0.125365585468748   0.121665469378017   0.117831600977850

  Columns 21 through 25

   0.113836085829665   0.109641009809692   0.105192666024702                   0                   0

  Columns 26 through 30

                   0                   0                   0                   0                   0

  Columns 31 through 35

                   0                   0                   0                   0                   0

  Columns 36 through 40

                   0                   0                   0                   0                   0

  Columns 41 through 45

                   0                   0                   0                   0                   0

  Columns 46 through 50

                   0                   0                   0                   0                   0

  Columns 51 through 55

                   0                   0                   0                   0                   0

  Columns 56 through 60

                   0                   0                   0                   0                   0

  Column 61

                   0


inner_code_BER =

  Columns 1 through 5

   0.178618472275941   0.175756771893937   0.172874503078912   0.169970190484945   0.167042151571198

  Columns 6 through 10

   0.164088466907412   0.161106944448430   0.158095076167206   0.155049984911914   0.151968358622768

  Columns 11 through 15

   0.148846368010973   0.145679562314755   0.142462735565477   0.139189752529021   0.135853318478615

  Columns 16 through 20

   0.132444669074878   0.128953143859587   0.125365585468748   0.121665469378016   0.117831600977850

  Columns 21 through 25

   0.113836085829665   0.109641009809692   0.105192666024702   0.100410683283289                   0

  Columns 26 through 30

                   0                   0                   0                   0                   0

  Columns 31 through 35

                   0                   0                   0                   0                   0

  Columns 36 through 40

                   0                   0                   0                   0                   0

  Columns 41 through 45

                   0                   0                   0                   0                   0

  Columns 46 through 50

                   0                   0                   0                   0                   0

  Columns 51 through 55

                   0                   0                   0                   0                   0

  Columns 56 through 60

                   0                   0                   0                   0                   0

  Column 61

                   0


outer_code_BER =

  Columns 1 through 5

   0.178618472275942   0.175756771893938   0.172874503078912   0.169970190484946   0.167042151571197

  Columns 6 through 10

   0.164088466907412   0.161106944448430   0.158095076167206   0.155049984911914   0.151968358622768

  Columns 11 through 15

   0.148846368010973   0.145679562314756   0.142462735565476   0.139189752529022   0.135853318478615

  Columns 16 through 20

   0.132444669074878   0.128953143859587   0.125365585468748   0.121665469378017   0.117831600977850

  Columns 21 through 25

   0.113836085829665   0.109641009809692   0.105192666024702   0.100410683283289                   0

  Columns 26 through 30

                   0                   0                   0                   0                   0

  Columns 31 through 35

                   0                   0                   0                   0                   0

  Columns 36 through 40

                   0                   0                   0                   0                   0

  Columns 41 through 45

                   0                   0                   0                   0                   0

  Columns 46 through 50

                   0                   0                   0                   0                   0

  Columns 51 through 55

                   0                   0                   0                   0                   0

  Columns 56 through 60

                   0                   0                   0                   0                   0

  Column 61

                   0


inner_code_BER =

  Columns 1 through 5

   0.178618472275941   0.175756771893937   0.172874503078912   0.169970190484945   0.167042151571198

  Columns 6 through 10

   0.164088466907412   0.161106944448430   0.158095076167206   0.155049984911914   0.151968358622768

  Columns 11 through 15

   0.148846368010973   0.145679562314755   0.142462735565477   0.139189752529021   0.135853318478615

  Columns 16 through 20

   0.132444669074878   0.128953143859587   0.125365585468748   0.121665469378016   0.117831600977850

  Columns 21 through 25

   0.113836085829665   0.109641009809692   0.105192666024702   0.100410683283289   0.095165209985802

  Columns 26 through 30

                   0                   0                   0                   0                   0

  Columns 31 through 35

                   0                   0                   0                   0                   0

  Columns 36 through 40

                   0                   0                   0                   0                   0

  Columns 41 through 45

                   0                   0                   0                   0                   0

  Columns 46 through 50

                   0                   0                   0                   0                   0

  Columns 51 through 55

                   0                   0                   0                   0                   0

  Columns 56 through 60

                   0                   0                   0                   0                   0

  Column 61

                   0


outer_code_BER =

  Columns 1 through 5

   0.178618472275942   0.175756771893938   0.172874503078912   0.169970190484946   0.167042151571197

  Columns 6 through 10

   0.164088466907412   0.161106944448430   0.158095076167206   0.155049984911914   0.151968358622768

  Columns 11 through 15

   0.148846368010973   0.145679562314756   0.142462735565476   0.139189752529022   0.135853318478615

  Columns 16 through 20

   0.132444669074878   0.128953143859587   0.125365585468748   0.121665469378017   0.117831600977850

  Columns 21 through 25

   0.113836085829665   0.109641009809692   0.105192666024702   0.100410683283289   0.095165209985802

  Columns 26 through 30

                   0                   0                   0                   0                   0

  Columns 31 through 35

                   0                   0                   0                   0                   0

  Columns 36 through 40

                   0                   0                   0                   0                   0

  Columns 41 through 45

                   0                   0                   0                   0                   0

  Columns 46 through 50

                   0                   0                   0                   0                   0

  Columns 51 through 55

                   0                   0                   0                   0                   0

  Columns 56 through 60

                   0                   0                   0                   0                   0

  Column 61

                   0


inner_code_BER =

  Columns 1 through 5

   0.178618472275941   0.175756771893937   0.172874503078912   0.169970190484945   0.167042151571198

  Columns 6 through 10

   0.164088466907412   0.161106944448430   0.158095076167206   0.155049984911914   0.151968358622768

  Columns 11 through 15

   0.148846368010973   0.145679562314755   0.142462735565477   0.139189752529021   0.135853318478615

  Columns 16 through 20

   0.132444669074878   0.128953143859587   0.125365585468748   0.121665469378016   0.117831600977850

  Columns 21 through 25

   0.113836085829665   0.109641009809692   0.105192666024702   0.100410683283289   0.095165209985802

  Columns 26 through 30

   0.089220842707394                   0                   0                   0                   0

  Columns 31 through 35

                   0                   0                   0                   0                   0

  Columns 36 through 40

                   0                   0                   0                   0                   0

  Columns 41 through 45

                   0                   0                   0                   0                   0

  Columns 46 through 50

                   0                   0                   0                   0                   0

  Columns 51 through 55

                   0                   0                   0                   0                   0

  Columns 56 through 60

                   0                   0                   0                   0                   0

  Column 61

                   0


outer_code_BER =

  Columns 1 through 5

   0.178618472275942   0.175756771893938   0.172874503078912   0.169970190484946   0.167042151571197

  Columns 6 through 10

   0.164088466907412   0.161106944448430   0.158095076167206   0.155049984911914   0.151968358622768

  Columns 11 through 15

   0.148846368010973   0.145679562314756   0.142462735565476   0.139189752529022   0.135853318478615

  Columns 16 through 20

   0.132444669074878   0.128953143859587   0.125365585468748   0.121665469378017   0.117831600977850

  Columns 21 through 25

   0.113836085829665   0.109641009809692   0.105192666024702   0.100410683283289   0.095165209985802

  Columns 26 through 30

   0.089220842707395                   0                   0                   0                   0

  Columns 31 through 35

                   0                   0                   0                   0                   0

  Columns 36 through 40

                   0                   0                   0                   0                   0

  Columns 41 through 45

                   0                   0                   0                   0                   0

  Columns 46 through 50

                   0                   0                   0                   0                   0

  Columns 51 through 55

                   0                   0                   0                   0                   0

  Columns 56 through 60

                   0                   0                   0                   0                   0

  Column 61

                   0


inner_code_BER =

  Columns 1 through 5

   0.178618472275941   0.175756771893937   0.172874503078912   0.169970190484945   0.167042151571198

  Columns 6 through 10

   0.164088466907412   0.161106944448430   0.158095076167206   0.155049984911914   0.151968358622768

  Columns 11 through 15

   0.148846368010973   0.145679562314755   0.142462735565477   0.139189752529021   0.135853318478615

  Columns 16 through 20

   0.132444669074878   0.128953143859587   0.125365585468748   0.121665469378016   0.117831600977850

  Columns 21 through 25

   0.113836085829665   0.109641009809692   0.105192666024702   0.100410683283289   0.095165209985802

  Columns 26 through 30

   0.089220842707394   0.082058217956275                   0                   0                   0

  Columns 31 through 35

                   0                   0                   0                   0                   0

  Columns 36 through 40

                   0                   0                   0                   0                   0

  Columns 41 through 45

                   0                   0                   0                   0                   0

  Columns 46 through 50

                   0                   0                   0                   0                   0

  Columns 51 through 55

                   0                   0                   0                   0                   0

  Columns 56 through 60

                   0                   0                   0                   0                   0

  Column 61

                   0


outer_code_BER =

  Columns 1 through 5

   0.178618472275942   0.175756771893938   0.172874503078912   0.169970190484946   0.167042151571197

  Columns 6 through 10

   0.164088466907412   0.161106944448430   0.158095076167206   0.155049984911914   0.151968358622768

  Columns 11 through 15

   0.148846368010973   0.145679562314756   0.142462735565476   0.139189752529022   0.135853318478615

  Columns 16 through 20

   0.132444669074878   0.128953143859587   0.125365585468748   0.121665469378017   0.117831600977850

  Columns 21 through 25

   0.113836085829665   0.109641009809692   0.105192666024702   0.100410683283289   0.095165209985802

  Columns 26 through 30

   0.089220842707395   0.082058217956275                   0                   0                   0

  Columns 31 through 35

                   0                   0                   0                   0                   0

  Columns 36 through 40

                   0                   0                   0                   0                   0

  Columns 41 through 45

                   0                   0                   0                   0                   0

  Columns 46 through 50

                   0                   0                   0                   0                   0

  Columns 51 through 55

                   0                   0                   0                   0                   0

  Columns 56 through 60

                   0                   0                   0                   0                   0

  Column 61

                   0


inner_code_BER =

  Columns 1 through 5

   0.178618472275941   0.175756771893937   0.172874503078912   0.169970190484945   0.167042151571198

  Columns 6 through 10

   0.164088466907412   0.161106944448430   0.158095076167206   0.155049984911914   0.151968358622768

  Columns 11 through 15

   0.148846368010973   0.145679562314755   0.142462735565477   0.139189752529021   0.135853318478615

  Columns 16 through 20

   0.132444669074878   0.128953143859587   0.125365585468748   0.121665469378016   0.117831600977850

  Columns 21 through 25

   0.113836085829665   0.109641009809692   0.105192666024702   0.100410683283289   0.095165209985802

  Columns 26 through 30

   0.089220842707394   0.082058217956275   0.071883591191882                   0                   0

  Columns 31 through 35

                   0                   0                   0                   0                   0

  Columns 36 through 40

                   0                   0                   0                   0                   0

  Columns 41 through 45

                   0                   0                   0                   0                   0

  Columns 46 through 50

                   0                   0                   0                   0                   0

  Columns 51 through 55

                   0                   0                   0                   0                   0

  Columns 56 through 60

                   0                   0                   0                   0                   0

  Column 61

                   0


outer_code_BER =

  Columns 1 through 5

   0.178618472275942   0.175756771893938   0.172874503078912   0.169970190484946   0.167042151571197

  Columns 6 through 10

   0.164088466907412   0.161106944448430   0.158095076167206   0.155049984911914   0.151968358622768

  Columns 11 through 15

   0.148846368010973   0.145679562314756   0.142462735565476   0.139189752529022   0.135853318478615

  Columns 16 through 20

   0.132444669074878   0.128953143859587   0.125365585468748   0.121665469378017   0.117831600977850

  Columns 21 through 25

   0.113836085829665   0.109641009809692   0.105192666024702   0.100410683283289   0.095165209985802

  Columns 26 through 30

   0.089220842707395   0.082058217956275   0.071883591191908                   0                   0

  Columns 31 through 35

                   0                   0                   0                   0                   0

  Columns 36 through 40

                   0                   0                   0                   0                   0

  Columns 41 through 45

                   0                   0                   0                   0                   0

  Columns 46 through 50

                   0                   0                   0                   0                   0

  Columns 51 through 55

                   0                   0                   0                   0                   0

  Columns 56 through 60

                   0                   0                   0                   0                   0

  Column 61

                   0


inner_code_BER =

  Columns 1 through 5

   0.178618472275941   0.175756771893937   0.172874503078912   0.169970190484945   0.167042151571198

  Columns 6 through 10

   0.164088466907412   0.161106944448430   0.158095076167206   0.155049984911914   0.151968358622768

  Columns 11 through 15

   0.148846368010973   0.145679562314755   0.142462735565477   0.139189752529021   0.135853318478615

  Columns 16 through 20

   0.132444669074878   0.128953143859587   0.125365585468748   0.121665469378016   0.117831600977850

  Columns 21 through 25

   0.113836085829665   0.109641009809692   0.105192666024702   0.100410683283289   0.095165209985802

  Columns 26 through 30

   0.089220842707394   0.082058217956275   0.071883591191882   0.002313560872596                   0

  Columns 31 through 35

                   0                   0                   0                   0                   0

  Columns 36 through 40

                   0                   0                   0                   0                   0

  Columns 41 through 45

                   0                   0                   0                   0                   0

  Columns 46 through 50

                   0                   0                   0                   0                   0

  Columns 51 through 55

                   0                   0                   0                   0                   0

  Columns 56 through 60

                   0                   0                   0                   0                   0

  Column 61

                   0


outer_code_BER =

  Columns 1 through 5

   0.178618472275942   0.175756771893938   0.172874503078912   0.169970190484946   0.167042151571197

  Columns 6 through 10

   0.164088466907412   0.161106944448430   0.158095076167206   0.155049984911914   0.151968358622768

  Columns 11 through 15

   0.148846368010973   0.145679562314756   0.142462735565476   0.139189752529022   0.135853318478615

  Columns 16 through 20

   0.132444669074878   0.128953143859587   0.125365585468748   0.121665469378017   0.117831600977850

  Columns 21 through 25

   0.113836085829665   0.109641009809692   0.105192666024702   0.100410683283289   0.095165209985802

  Columns 26 through 30

   0.089220842707395   0.082058217956275   0.071883591191908   0.000000023629308                   0

  Columns 31 through 35

                   0                   0                   0                   0                   0

  Columns 36 through 40

                   0                   0                   0                   0                   0

  Columns 41 through 45

                   0                   0                   0                   0                   0

  Columns 46 through 50

                   0                   0                   0                   0                   0

  Columns 51 through 55

                   0                   0                   0                   0                   0

  Columns 56 through 60

                   0                   0                   0                   0                   0

  Column 61

                   0

��ǰ�����������ѵ���Ŀ�������ʣ������Ϊ2.80 dB

inner_code_BER =

  Columns 1 through 5

   0.178618472275941   0.175756771893937   0.172874503078912   0.169970190484945   0.167042151571198

  Columns 6 through 10

   0.164088466907412   0.161106944448430   0.158095076167206   0.155049984911914   0.151968358622768

  Columns 11 through 15

   0.148846368010973   0.145679562314755   0.142462735565477   0.139189752529021   0.135853318478615

  Columns 16 through 20

   0.132444669074878   0.128953143859587   0.125365585468748   0.121665469378016   0.117831600977850

  Columns 21 through 25

   0.113836085829665   0.109641009809692   0.105192666024702   0.100410683283289   0.095165209985802

  Columns 26 through 30

   0.089220842707394   0.082058217956275   0.071883591191882   0.002313560872596   0.001945546216025

  Columns 31 through 35

                   0                   0                   0                   0                   0

  Columns 36 through 40

                   0                   0                   0                   0                   0

  Columns 41 through 45

                   0                   0                   0                   0                   0

  Columns 46 through 50

                   0                   0                   0                   0                   0

  Columns 51 through 55

                   0                   0                   0                   0                   0

  Columns 56 through 60

                   0                   0                   0                   0                   0

  Column 61

                   0


inner_code_BER =

  Columns 1 through 5

   0.178618472275941   0.175756771893937   0.172874503078912   0.169970190484945   0.167042151571198

  Columns 6 through 10

   0.164088466907412   0.161106944448430   0.158095076167206   0.155049984911914   0.151968358622768

  Columns 11 through 15

   0.148846368010973   0.145679562314755   0.142462735565477   0.139189752529021   0.135853318478615

  Columns 16 through 20

   0.132444669074878   0.128953143859587   0.125365585468748   0.121665469378016   0.117831600977850

  Columns 21 through 25

   0.113836085829665   0.109641009809692   0.105192666024702   0.100410683283289   0.095165209985802

  Columns 26 through 30

   0.089220842707394   0.082058217956275   0.071883591191882   0.002313560872596   0.001945546216025

  Columns 31 through 35

   0.001674101450011                   0                   0                   0                   0

  Columns 36 through 40

                   0                   0                   0                   0                   0

  Columns 41 through 45

                   0                   0                   0                   0                   0

  Columns 46 through 50

                   0                   0                   0                   0                   0

  Columns 51 through 55

                   0                   0                   0                   0                   0

  Columns 56 through 60

                   0                   0                   0                   0                   0

  Column 61

                   0


inner_code_BER =

  Columns 1 through 5

   0.178618472275941   0.175756771893937   0.172874503078912   0.169970190484945   0.167042151571198

  Columns 6 through 10

   0.164088466907412   0.161106944448430   0.158095076167206   0.155049984911914   0.151968358622768

  Columns 11 through 15

   0.148846368010973   0.145679562314755   0.142462735565477   0.139189752529021   0.135853318478615

  Columns 16 through 20

   0.132444669074878   0.128953143859587   0.125365585468748   0.121665469378016   0.117831600977850

  Columns 21 through 25

   0.113836085829665   0.109641009809692   0.105192666024702   0.100410683283289   0.095165209985802

  Columns 26 through 30

   0.089220842707394   0.082058217956275   0.071883591191882   0.002313560872596   0.001945546216025

  Columns 31 through 35

   0.001674101450011   0.001462295851387                   0                   0                   0

  Columns 36 through 40

                   0                   0                   0                   0                   0

  Columns 41 through 45

                   0                   0                   0                   0                   0

  Columns 46 through 50

                   0                   0                   0                   0                   0

  Columns 51 through 55

                   0                   0                   0                   0                   0

  Columns 56 through 60

                   0                   0                   0                   0                   0

  Column 61

                   0


inner_code_BER =

  Columns 1 through 5

   0.178618472275941   0.175756771893937   0.172874503078912   0.169970190484945   0.167042151571198

  Columns 6 through 10

   0.164088466907412   0.161106944448430   0.158095076167206   0.155049984911914   0.151968358622768

  Columns 11 through 15

   0.148846368010973   0.145679562314755   0.142462735565477   0.139189752529021   0.135853318478615

  Columns 16 through 20

   0.132444669074878   0.128953143859587   0.125365585468748   0.121665469378016   0.117831600977850

  Columns 21 through 25

   0.113836085829665   0.109641009809692   0.105192666024702   0.100410683283289   0.095165209985802

  Columns 26 through 30

   0.089220842707394   0.082058217956275   0.071883591191882   0.002313560872596   0.001945546216025

  Columns 31 through 35

   0.001674101450011   0.001462295851387   0.001291014114525                   0                   0

  Columns 36 through 40

                   0                   0                   0                   0                   0

  Columns 41 through 45

                   0                   0                   0                   0                   0

  Columns 46 through 50

                   0                   0                   0                   0                   0

  Columns 51 through 55

                   0                   0                   0                   0                   0

  Columns 56 through 60

                   0                   0                   0                   0                   0

  Column 61

                   0


inner_code_BER =

  Columns 1 through 5

   0.178618472275941   0.175756771893937   0.172874503078912   0.169970190484945   0.167042151571198

  Columns 6 through 10

   0.164088466907412   0.161106944448430   0.158095076167206   0.155049984911914   0.151968358622768

  Columns 11 through 15

   0.148846368010973   0.145679562314755   0.142462735565477   0.139189752529021   0.135853318478615

  Columns 16 through 20

   0.132444669074878   0.128953143859587   0.125365585468748   0.121665469378016   0.117831600977850

  Columns 21 through 25

   0.113836085829665   0.109641009809692   0.105192666024702   0.100410683283289   0.095165209985802

  Columns 26 through 30

   0.089220842707394   0.082058217956275   0.071883591191882   0.002313560872596   0.001945546216025

  Columns 31 through 35

   0.001674101450011   0.001462295851387   0.001291014114525   0.001149025277616                   0

  Columns 36 through 40

                   0                   0                   0                   0                   0

  Columns 41 through 45

                   0                   0                   0                   0                   0

  Columns 46 through 50

                   0                   0                   0                   0                   0

  Columns 51 through 55

                   0                   0                   0                   0                   0

  Columns 56 through 60

                   0                   0                   0                   0                   0

  Column 61

                   0


inner_code_BER =

  Columns 1 through 5

   0.178618472275941   0.175756771893937   0.172874503078912   0.169970190484945   0.167042151571198

  Columns 6 through 10

   0.164088466907412   0.161106944448430   0.158095076167206   0.155049984911914   0.151968358622768

  Columns 11 through 15

   0.148846368010973   0.145679562314755   0.142462735565477   0.139189752529021   0.135853318478615

  Columns 16 through 20

   0.132444669074878   0.128953143859587   0.125365585468748   0.121665469378016   0.117831600977850

  Columns 21 through 25

   0.113836085829665   0.109641009809692   0.105192666024702   0.100410683283289   0.095165209985802

  Columns 26 through 30

   0.089220842707394   0.082058217956275   0.071883591191882   0.002313560872596   0.001945546216025

  Columns 31 through 35

   0.001674101450011   0.001462295851387   0.001291014114525   0.001149025277616   0.001029151935991

  Columns 36 through 40

                   0                   0                   0                   0                   0

  Columns 41 through 45

                   0                   0                   0                   0                   0

  Columns 46 through 50

                   0                   0                   0                   0                   0

  Columns 51 through 55

                   0                   0                   0                   0                   0

  Columns 56 through 60

                   0                   0                   0                   0                   0

  Column 61

                   0


inner_code_BER =

  Columns 1 through 5

   0.178618472275941   0.175756771893937   0.172874503078912   0.169970190484945   0.167042151571198

  Columns 6 through 10

   0.164088466907412   0.161106944448430   0.158095076167206   0.155049984911914   0.151968358622768

  Columns 11 through 15

   0.148846368010973   0.145679562314755   0.142462735565477   0.139189752529021   0.135853318478615

  Columns 16 through 20

   0.132444669074878   0.128953143859587   0.125365585468748   0.121665469378016   0.117831600977850

  Columns 21 through 25

   0.113836085829665   0.109641009809692   0.105192666024702   0.100410683283289   0.095165209985802

  Columns 26 through 30

   0.089220842707394   0.082058217956275   0.071883591191882   0.002313560872596   0.001945546216025

  Columns 31 through 35

   0.001674101450011   0.001462295851387   0.001291014114525   0.001149025277616   0.001029151935991

  Columns 36 through 40

   0.000926522561608                   0                   0                   0                   0

  Columns 41 through 45

                   0                   0                   0                   0                   0

  Columns 46 through 50

                   0                   0                   0                   0                   0

  Columns 51 through 55

                   0                   0                   0                   0                   0

  Columns 56 through 60

                   0                   0                   0                   0                   0

  Column 61

                   0


inner_code_BER =

  Columns 1 through 5

   0.178618472275941   0.175756771893937   0.172874503078912   0.169970190484945   0.167042151571198

  Columns 6 through 10

   0.164088466907412   0.161106944448430   0.158095076167206   0.155049984911914   0.151968358622768

  Columns 11 through 15

   0.148846368010973   0.145679562314755   0.142462735565477   0.139189752529021   0.135853318478615

  Columns 16 through 20

   0.132444669074878   0.128953143859587   0.125365585468748   0.121665469378016   0.117831600977850

  Columns 21 through 25

   0.113836085829665   0.109641009809692   0.105192666024702   0.100410683283289   0.095165209985802

  Columns 26 through 30

   0.089220842707394   0.082058217956275   0.071883591191882   0.002313560872596   0.001945546216025

  Columns 31 through 35

   0.001674101450011   0.001462295851387   0.001291014114525   0.001149025277616   0.001029151935991

  Columns 36 through 40

   0.000926522561608   0.000837677258862                   0                   0                   0

  Columns 41 through 45

                   0                   0                   0                   0                   0

  Columns 46 through 50

                   0                   0                   0                   0                   0

  Columns 51 through 55

                   0                   0                   0                   0                   0

  Columns 56 through 60

                   0                   0                   0                   0                   0

  Column 61

                   0


inner_code_BER =

  Columns 1 through 5

   0.178618472275941   0.175756771893937   0.172874503078912   0.169970190484945   0.167042151571198

  Columns 6 through 10

   0.164088466907412   0.161106944448430   0.158095076167206   0.155049984911914   0.151968358622768

  Columns 11 through 15

   0.148846368010973   0.145679562314755   0.142462735565477   0.139189752529021   0.135853318478615

  Columns 16 through 20

   0.132444669074878   0.128953143859587   0.125365585468748   0.121665469378016   0.117831600977850

  Columns 21 through 25

   0.113836085829665   0.109641009809692   0.105192666024702   0.100410683283289   0.095165209985802

  Columns 26 through 30

   0.089220842707394   0.082058217956275   0.071883591191882   0.002313560872596   0.001945546216025

  Columns 31 through 35

   0.001674101450011   0.001462295851387   0.001291014114525   0.001149025277616   0.001029151935991

  Columns 36 through 40

   0.000926522561608   0.000837677258862   0.000760070042906                   0                   0

  Columns 41 through 45

                   0                   0                   0                   0                   0

  Columns 46 through 50

                   0                   0                   0                   0                   0

  Columns 51 through 55

                   0                   0                   0                   0                   0

  Columns 56 through 60

                   0                   0                   0                   0                   0

  Column 61

                   0


inner_code_BER =

  Columns 1 through 5

   0.178618472275941   0.175756771893937   0.172874503078912   0.169970190484945   0.167042151571198

  Columns 6 through 10

   0.164088466907412   0.161106944448430   0.158095076167206   0.155049984911914   0.151968358622768

  Columns 11 through 15

   0.148846368010973   0.145679562314755   0.142462735565477   0.139189752529021   0.135853318478615

  Columns 16 through 20

   0.132444669074878   0.128953143859587   0.125365585468748   0.121665469378016   0.117831600977850

  Columns 21 through 25

   0.113836085829665   0.109641009809692   0.105192666024702   0.100410683283289   0.095165209985802

  Columns 26 through 30

   0.089220842707394   0.082058217956275   0.071883591191882   0.002313560872596   0.001945546216025

  Columns 31 through 35

   0.001674101450011   0.001462295851387   0.001291014114525   0.001149025277616   0.001029151935991

  Columns 36 through 40

   0.000926522561608   0.000837677258862   0.000760070042906   0.000691773315436                   0

  Columns 41 through 45

                   0                   0                   0                   0                   0

  Columns 46 through 50

                   0                   0                   0                   0                   0

  Columns 51 through 55

                   0                   0                   0                   0                   0

  Columns 56 through 60

                   0                   0                   0                   0                   0

  Column 61

                   0


inner_code_BER =

  Columns 1 through 5

   0.178618472275941   0.175756771893937   0.172874503078912   0.169970190484945   0.167042151571198

  Columns 6 through 10

   0.164088466907412   0.161106944448430   0.158095076167206   0.155049984911914   0.151968358622768

  Columns 11 through 15

   0.148846368010973   0.145679562314755   0.142462735565477   0.139189752529021   0.135853318478615

  Columns 16 through 20

   0.132444669074878   0.128953143859587   0.125365585468748   0.121665469378016   0.117831600977850

  Columns 21 through 25

   0.113836085829665   0.109641009809692   0.105192666024702   0.100410683283289   0.095165209985802

  Columns 26 through 30

   0.089220842707394   0.082058217956275   0.071883591191882   0.002313560872596   0.001945546216025

  Columns 31 through 35

   0.001674101450011   0.001462295851387   0.001291014114525   0.001149025277616   0.001029151935991

  Columns 36 through 40

   0.000926522561608   0.000837677258862   0.000760070042906   0.000691773315436   0.000631293144879

  Columns 41 through 45

                   0                   0                   0                   0                   0

  Columns 46 through 50

                   0                   0                   0                   0                   0

  Columns 51 through 55

                   0                   0                   0                   0                   0

  Columns 56 through 60

                   0                   0                   0                   0                   0

  Column 61

                   0


inner_code_BER =

  Columns 1 through 5

   0.178618472275941   0.175756771893937   0.172874503078912   0.169970190484945   0.167042151571198

  Columns 6 through 10

   0.164088466907412   0.161106944448430   0.158095076167206   0.155049984911914   0.151968358622768

  Columns 11 through 15

   0.148846368010973   0.145679562314755   0.142462735565477   0.139189752529021   0.135853318478615

  Columns 16 through 20

   0.132444669074878   0.128953143859587   0.125365585468748   0.121665469378016   0.117831600977850

  Columns 21 through 25

   0.113836085829665   0.109641009809692   0.105192666024702   0.100410683283289   0.095165209985802

  Columns 26 through 30

   0.089220842707394   0.082058217956275   0.071883591191882   0.002313560872596   0.001945546216025

  Columns 31 through 35

   0.001674101450011   0.001462295851387   0.001291014114525   0.001149025277616   0.001029151935991

  Columns 36 through 40

   0.000926522561608   0.000837677258862   0.000760070042906   0.000691773315436   0.000631293144879

  Columns 41 through 45

   0.000577448865893                   0                   0                   0                   0

  Columns 46 through 50

                   0                   0                   0                   0                   0

  Columns 51 through 55

                   0                   0                   0                   0                   0

  Columns 56 through 60

                   0                   0                   0                   0                   0

  Column 61

                   0


inner_code_BER =

  Columns 1 through 5

   0.178618472275941   0.175756771893937   0.172874503078912   0.169970190484945   0.167042151571198

  Columns 6 through 10

   0.164088466907412   0.161106944448430   0.158095076167206   0.155049984911914   0.151968358622768

  Columns 11 through 15

   0.148846368010973   0.145679562314755   0.142462735565477   0.139189752529021   0.135853318478615

  Columns 16 through 20

   0.132444669074878   0.128953143859587   0.125365585468748   0.121665469378016   0.117831600977850

  Columns 21 through 25

   0.113836085829665   0.109641009809692   0.105192666024702   0.100410683283289   0.095165209985802

  Columns 26 through 30

   0.089220842707394   0.082058217956275   0.071883591191882   0.002313560872596   0.001945546216025

  Columns 31 through 35

   0.001674101450011   0.001462295851387   0.001291014114525   0.001149025277616   0.001029151935991

  Columns 36 through 40

   0.000926522561608   0.000837677258862   0.000760070042906   0.000691773315436   0.000631293144879

  Columns 41 through 45

   0.000577448865893   0.000529291818456                   0                   0                   0

  Columns 46 through 50

                   0                   0                   0                   0                   0

  Columns 51 through 55

                   0                   0                   0                   0                   0

  Columns 56 through 60

                   0                   0                   0                   0                   0

  Column 61

                   0


inner_code_BER =

  Columns 1 through 5

   0.178618472275941   0.175756771893937   0.172874503078912   0.169970190484945   0.167042151571198

  Columns 6 through 10

   0.164088466907412   0.161106944448430   0.158095076167206   0.155049984911914   0.151968358622768

  Columns 11 through 15

   0.148846368010973   0.145679562314755   0.142462735565477   0.139189752529021   0.135853318478615

  Columns 16 through 20

   0.132444669074878   0.128953143859587   0.125365585468748   0.121665469378016   0.117831600977850

  Columns 21 through 25

   0.113836085829665   0.109641009809692   0.105192666024702   0.100410683283289   0.095165209985802

  Columns 26 through 30

   0.089220842707394   0.082058217956275   0.071883591191882   0.002313560872596   0.001945546216025

  Columns 31 through 35

   0.001674101450011   0.001462295851387   0.001291014114525   0.001149025277616   0.001029151935991

  Columns 36 through 40

   0.000926522561608   0.000837677258862   0.000760070042906   0.000691773315436   0.000631293144879

  Columns 41 through 45

   0.000577448865893   0.000529291818456   0.000486048862039                   0                   0

  Columns 46 through 50

                   0                   0                   0                   0                   0

  Columns 51 through 55

                   0                   0                   0                   0                   0

  Columns 56 through 60

                   0                   0                   0                   0                   0

  Column 61

                   0


inner_code_BER =

  Columns 1 through 5

   0.178618472275941   0.175756771893937   0.172874503078912   0.169970190484945   0.167042151571198

  Columns 6 through 10

   0.164088466907412   0.161106944448430   0.158095076167206   0.155049984911914   0.151968358622768

  Columns 11 through 15

   0.148846368010973   0.145679562314755   0.142462735565477   0.139189752529021   0.135853318478615

  Columns 16 through 20

   0.132444669074878   0.128953143859587   0.125365585468748   0.121665469378016   0.117831600977850

  Columns 21 through 25

   0.113836085829665   0.109641009809692   0.105192666024702   0.100410683283289   0.095165209985802

  Columns 26 through 30

   0.089220842707394   0.082058217956275   0.071883591191882   0.002313560872596   0.001945546216025

  Columns 31 through 35

   0.001674101450011   0.001462295851387   0.001291014114525   0.001149025277616   0.001029151935991

  Columns 36 through 40

   0.000926522561608   0.000837677258862   0.000760070042906   0.000691773315436   0.000631293144879

  Columns 41 through 45

   0.000577448865893   0.000529291818456   0.000486048862039   0.000447082106100                   0

  Columns 46 through 50

                   0                   0                   0                   0                   0

  Columns 51 through 55

                   0                   0                   0                   0                   0

  Columns 56 through 60

                   0                   0                   0                   0                   0

  Column 61

                   0


inner_code_BER =

  Columns 1 through 5

   0.178618472275941   0.175756771893937   0.172874503078912   0.169970190484945   0.167042151571198

  Columns 6 through 10

   0.164088466907412   0.161106944448430   0.158095076167206   0.155049984911914   0.151968358622768

  Columns 11 through 15

   0.148846368010973   0.145679562314755   0.142462735565477   0.139189752529021   0.135853318478615

  Columns 16 through 20

   0.132444669074878   0.128953143859587   0.125365585468748   0.121665469378016   0.117831600977850

  Columns 21 through 25

   0.113836085829665   0.109641009809692   0.105192666024702   0.100410683283289   0.095165209985802

  Columns 26 through 30

   0.089220842707394   0.082058217956275   0.071883591191882   0.002313560872596   0.001945546216025

  Columns 31 through 35

   0.001674101450011   0.001462295851387   0.001291014114525   0.001149025277616   0.001029151935991

  Columns 36 through 40

   0.000926522561608   0.000837677258862   0.000760070042906   0.000691773315436   0.000631293144879

  Columns 41 through 45

   0.000577448865893   0.000529291818456   0.000486048862039   0.000447082106100   0.000411859564956

  Columns 46 through 50

                   0                   0                   0                   0                   0

  Columns 51 through 55

                   0                   0                   0                   0                   0

  Columns 56 through 60

                   0                   0                   0                   0                   0

  Column 61

                   0


inner_code_BER =

  Columns 1 through 5

   0.178618472275941   0.175756771893937   0.172874503078912   0.169970190484945   0.167042151571198

  Columns 6 through 10

   0.164088466907412   0.161106944448430   0.158095076167206   0.155049984911914   0.151968358622768

  Columns 11 through 15

   0.148846368010973   0.145679562314755   0.142462735565477   0.139189752529021   0.135853318478615

  Columns 16 through 20

   0.132444669074878   0.128953143859587   0.125365585468748   0.121665469378016   0.117831600977850

  Columns 21 through 25

   0.113836085829665   0.109641009809692   0.105192666024702   0.100410683283289   0.095165209985802

  Columns 26 through 30

   0.089220842707394   0.082058217956275   0.071883591191882   0.002313560872596   0.001945546216025

  Columns 31 through 35

   0.001674101450011   0.001462295851387   0.001291014114525   0.001149025277616   0.001029151935991

  Columns 36 through 40

   0.000926522561608   0.000837677258862   0.000760070042906   0.000691773315436   0.000631293144879

  Columns 41 through 45

   0.000577448865893   0.000529291818456   0.000486048862039   0.000447082106100   0.000411859564956

  Columns 46 through 50

   0.000379933358762                   0                   0                   0                   0

  Columns 51 through 55

                   0                   0                   0                   0                   0

  Columns 56 through 60

                   0                   0                   0                   0                   0

  Column 61

                   0


inner_code_BER =

  Columns 1 through 5

   0.178618472275941   0.175756771893937   0.172874503078912   0.169970190484945   0.167042151571198

  Columns 6 through 10

   0.164088466907412   0.161106944448430   0.158095076167206   0.155049984911914   0.151968358622768

  Columns 11 through 15

   0.148846368010973   0.145679562314755   0.142462735565477   0.139189752529021   0.135853318478615

  Columns 16 through 20

   0.132444669074878   0.128953143859587   0.125365585468748   0.121665469378016   0.117831600977850

  Columns 21 through 25

   0.113836085829665   0.109641009809692   0.105192666024702   0.100410683283289   0.095165209985802

  Columns 26 through 30

   0.089220842707394   0.082058217956275   0.071883591191882   0.002313560872596   0.001945546216025

  Columns 31 through 35

   0.001674101450011   0.001462295851387   0.001291014114525   0.001149025277616   0.001029151935991

  Columns 36 through 40

   0.000926522561608   0.000837677258862   0.000760070042906   0.000691773315436   0.000631293144879

  Columns 41 through 45

   0.000577448865893   0.000529291818456   0.000486048862039   0.000447082106100   0.000411859564956

  Columns 46 through 50

   0.000379933358762   0.000350923242973                   0                   0                   0

  Columns 51 through 55

                   0                   0                   0                   0                   0

  Columns 56 through 60

                   0                   0                   0                   0                   0

  Column 61

                   0


inner_code_BER =

  Columns 1 through 5

   0.178618472275941   0.175756771893937   0.172874503078912   0.169970190484945   0.167042151571198

  Columns 6 through 10

   0.164088466907412   0.161106944448430   0.158095076167206   0.155049984911914   0.151968358622768

  Columns 11 through 15

   0.148846368010973   0.145679562314755   0.142462735565477   0.139189752529021   0.135853318478615

  Columns 16 through 20

   0.132444669074878   0.128953143859587   0.125365585468748   0.121665469378016   0.117831600977850

  Columns 21 through 25

   0.113836085829665   0.109641009809692   0.105192666024702   0.100410683283289   0.095165209985802

  Columns 26 through 30

   0.089220842707394   0.082058217956275   0.071883591191882   0.002313560872596   0.001945546216025

  Columns 31 through 35

   0.001674101450011   0.001462295851387   0.001291014114525   0.001149025277616   0.001029151935991

  Columns 36 through 40

   0.000926522561608   0.000837677258862   0.000760070042906   0.000691773315436   0.000631293144879

  Columns 41 through 45

   0.000577448865893   0.000529291818456   0.000486048862039   0.000447082106100   0.000411859564956

  Columns 46 through 50

   0.000379933358762   0.000350923242973   0.000324503974403                   0                   0

  Columns 51 through 55

                   0                   0                   0                   0                   0

  Columns 56 through 60

                   0                   0                   0                   0                   0

  Column 61

                   0


inner_code_BER =

  Columns 1 through 5

   0.178618472275941   0.175756771893937   0.172874503078912   0.169970190484945   0.167042151571198

  Columns 6 through 10

   0.164088466907412   0.161106944448430   0.158095076167206   0.155049984911914   0.151968358622768

  Columns 11 through 15

   0.148846368010973   0.145679562314755   0.142462735565477   0.139189752529021   0.135853318478615

  Columns 16 through 20

   0.132444669074878   0.128953143859587   0.125365585468748   0.121665469378016   0.117831600977850

  Columns 21 through 25

   0.113836085829665   0.109641009809692   0.105192666024702   0.100410683283289   0.095165209985802

  Columns 26 through 30

   0.089220842707394   0.082058217956275   0.071883591191882   0.002313560872596   0.001945546216025

  Columns 31 through 35

   0.001674101450011   0.001462295851387   0.001291014114525   0.001149025277616   0.001029151935991

  Columns 36 through 40

   0.000926522561608   0.000837677258862   0.000760070042906   0.000691773315436   0.000631293144879

  Columns 41 through 45

   0.000577448865893   0.000529291818456   0.000486048862039   0.000447082106100   0.000411859564956

  Columns 46 through 50

   0.000379933358762   0.000350923242973   0.000324503974403   0.000300395488150                   0

  Columns 51 through 55

                   0                   0                   0                   0                   0

  Columns 56 through 60

                   0                   0                   0                   0                   0

  Column 61

                   0


inner_code_BER =

  Columns 1 through 5

   0.178618472275941   0.175756771893937   0.172874503078912   0.169970190484945   0.167042151571198

  Columns 6 through 10

   0.164088466907412   0.161106944448430   0.158095076167206   0.155049984911914   0.151968358622768

  Columns 11 through 15

   0.148846368010973   0.145679562314755   0.142462735565477   0.139189752529021   0.135853318478615

  Columns 16 through 20

   0.132444669074878   0.128953143859587   0.125365585468748   0.121665469378016   0.117831600977850

  Columns 21 through 25

   0.113836085829665   0.109641009809692   0.105192666024702   0.100410683283289   0.095165209985802

  Columns 26 through 30

   0.089220842707394   0.082058217956275   0.071883591191882   0.002313560872596   0.001945546216025

  Columns 31 through 35

   0.001674101450011   0.001462295851387   0.001291014114525   0.001149025277616   0.001029151935991

  Columns 36 through 40

   0.000926522561608   0.000837677258862   0.000760070042906   0.000691773315436   0.000631293144879

  Columns 41 through 45

   0.000577448865893   0.000529291818456   0.000486048862039   0.000447082106100   0.000411859564956

  Columns 46 through 50

   0.000379933358762   0.000350923242973   0.000324503974403   0.000300395488150   0.000278355166268

  Columns 51 through 55

                   0                   0                   0                   0                   0

  Columns 56 through 60

                   0                   0                   0                   0                   0

  Column 61

                   0


inner_code_BER =

  Columns 1 through 5

   0.178618472275941   0.175756771893937   0.172874503078912   0.169970190484945   0.167042151571198

  Columns 6 through 10

   0.164088466907412   0.161106944448430   0.158095076167206   0.155049984911914   0.151968358622768

  Columns 11 through 15

   0.148846368010973   0.145679562314755   0.142462735565477   0.139189752529021   0.135853318478615

  Columns 16 through 20

   0.132444669074878   0.128953143859587   0.125365585468748   0.121665469378016   0.117831600977850

  Columns 21 through 25

   0.113836085829665   0.109641009809692   0.105192666024702   0.100410683283289   0.095165209985802

  Columns 26 through 30

   0.089220842707394   0.082058217956275   0.071883591191882   0.002313560872596   0.001945546216025

  Columns 31 through 35

   0.001674101450011   0.001462295851387   0.001291014114525   0.001149025277616   0.001029151935991

  Columns 36 through 40

   0.000926522561608   0.000837677258862   0.000760070042906   0.000691773315436   0.000631293144879

  Columns 41 through 45

   0.000577448865893   0.000529291818456   0.000486048862039   0.000447082106100   0.000411859564956

  Columns 46 through 50

   0.000379933358762   0.000350923242973   0.000324503974403   0.000300395488150   0.000278355166268

  Columns 51 through 55

   0.000258171685122                   0                   0                   0                   0

  Columns 56 through 60

                   0                   0                   0                   0                   0

  Column 61

                   0


inner_code_BER =

  Columns 1 through 5

   0.178618472275941   0.175756771893937   0.172874503078912   0.169970190484945   0.167042151571198

  Columns 6 through 10

   0.164088466907412   0.161106944448430   0.158095076167206   0.155049984911914   0.151968358622768

  Columns 11 through 15

   0.148846368010973   0.145679562314755   0.142462735565477   0.139189752529021   0.135853318478615

  Columns 16 through 20

   0.132444669074878   0.128953143859587   0.125365585468748   0.121665469378016   0.117831600977850

  Columns 21 through 25

   0.113836085829665   0.109641009809692   0.105192666024702   0.100410683283289   0.095165209985802

  Columns 26 through 30

   0.089220842707394   0.082058217956275   0.071883591191882   0.002313560872596   0.001945546216025

  Columns 31 through 35

   0.001674101450011   0.001462295851387   0.001291014114525   0.001149025277616   0.001029151935991

  Columns 36 through 40

   0.000926522561608   0.000837677258862   0.000760070042906   0.000691773315436   0.000631293144879

  Columns 41 through 45

   0.000577448865893   0.000529291818456   0.000486048862039   0.000447082106100   0.000411859564956

  Columns 46 through 50

   0.000379933358762   0.000350923242973   0.000324503974403   0.000300395488150   0.000278355166268

  Columns 51 through 55

   0.000258171685122   0.000239660069558                   0                   0                   0

  Columns 56 through 60

                   0                   0                   0                   0                   0

  Column 61

                   0


inner_code_BER =

  Columns 1 through 5

   0.178618472275941   0.175756771893937   0.172874503078912   0.169970190484945   0.167042151571198

  Columns 6 through 10

   0.164088466907412   0.161106944448430   0.158095076167206   0.155049984911914   0.151968358622768

  Columns 11 through 15

   0.148846368010973   0.145679562314755   0.142462735565477   0.139189752529021   0.135853318478615

  Columns 16 through 20

   0.132444669074878   0.128953143859587   0.125365585468748   0.121665469378016   0.117831600977850

  Columns 21 through 25

   0.113836085829665   0.109641009809692   0.105192666024702   0.100410683283289   0.095165209985802

  Columns 26 through 30

   0.089220842707394   0.082058217956275   0.071883591191882   0.002313560872596   0.001945546216025

  Columns 31 through 35

   0.001674101450011   0.001462295851387   0.001291014114525   0.001149025277616   0.001029151935991

  Columns 36 through 40

   0.000926522561608   0.000837677258862   0.000760070042906   0.000691773315436   0.000631293144879

  Columns 41 through 45

   0.000577448865893   0.000529291818456   0.000486048862039   0.000447082106100   0.000411859564956

  Columns 46 through 50

   0.000379933358762   0.000350923242973   0.000324503974403   0.000300395488150   0.000278355166268

  Columns 51 through 55

   0.000258171685122   0.000239660069558   0.000222657680434                   0                   0

  Columns 56 through 60

                   0                   0                   0                   0                   0

  Column 61

                   0


inner_code_BER =

  Columns 1 through 5

   0.178618472275941   0.175756771893937   0.172874503078912   0.169970190484945   0.167042151571198

  Columns 6 through 10

   0.164088466907412   0.161106944448430   0.158095076167206   0.155049984911914   0.151968358622768

  Columns 11 through 15

   0.148846368010973   0.145679562314755   0.142462735565477   0.139189752529021   0.135853318478615

  Columns 16 through 20

   0.132444669074878   0.128953143859587   0.125365585468748   0.121665469378016   0.117831600977850

  Columns 21 through 25

   0.113836085829665   0.109641009809692   0.105192666024702   0.100410683283289   0.095165209985802

  Columns 26 through 30

   0.089220842707394   0.082058217956275   0.071883591191882   0.002313560872596   0.001945546216025

  Columns 31 through 35

   0.001674101450011   0.001462295851387   0.001291014114525   0.001149025277616   0.001029151935991

  Columns 36 through 40

   0.000926522561608   0.000837677258862   0.000760070042906   0.000691773315436   0.000631293144879

  Columns 41 through 45

   0.000577448865893   0.000529291818456   0.000486048862039   0.000447082106100   0.000411859564956

  Columns 46 through 50

   0.000379933358762   0.000350923242973   0.000324503974403   0.000300395488150   0.000278355166268

  Columns 51 through 55

   0.000258171685122   0.000239660069558   0.000222657680434   0.000207020931759                   0

  Columns 56 through 60

                   0                   0                   0                   0                   0

  Column 61

                   0


inner_code_BER =

  Columns 1 through 5

   0.178618472275941   0.175756771893937   0.172874503078912   0.169970190484945   0.167042151571198

  Columns 6 through 10

   0.164088466907412   0.161106944448430   0.158095076167206   0.155049984911914   0.151968358622768

  Columns 11 through 15

   0.148846368010973   0.145679562314755   0.142462735565477   0.139189752529021   0.135853318478615

  Columns 16 through 20

   0.132444669074878   0.128953143859587   0.125365585468748   0.121665469378016   0.117831600977850

  Columns 21 through 25

   0.113836085829665   0.109641009809692   0.105192666024702   0.100410683283289   0.095165209985802

  Columns 26 through 30

   0.089220842707394   0.082058217956275   0.071883591191882   0.002313560872596   0.001945546216025

  Columns 31 through 35

   0.001674101450011   0.001462295851387   0.001291014114525   0.001149025277616   0.001029151935991

  Columns 36 through 40

   0.000926522561608   0.000837677258862   0.000760070042906   0.000691773315436   0.000631293144879

  Columns 41 through 45

   0.000577448865893   0.000529291818456   0.000486048862039   0.000447082106100   0.000411859564956

  Columns 46 through 50

   0.000379933358762   0.000350923242973   0.000324503974403   0.000300395488150   0.000278355166268

  Columns 51 through 55

   0.000258171685122   0.000239660069558   0.000222657680434   0.000207020931759   0.000192622583817

  Columns 56 through 60

                   0                   0                   0                   0                   0

  Column 61

                   0


inner_code_BER =

  Columns 1 through 5

   0.178618472275941   0.175756771893937   0.172874503078912   0.169970190484945   0.167042151571198

  Columns 6 through 10

   0.164088466907412   0.161106944448430   0.158095076167206   0.155049984911914   0.151968358622768

  Columns 11 through 15

   0.148846368010973   0.145679562314755   0.142462735565477   0.139189752529021   0.135853318478615

  Columns 16 through 20

   0.132444669074878   0.128953143859587   0.125365585468748   0.121665469378016   0.117831600977850

  Columns 21 through 25

   0.113836085829665   0.109641009809692   0.105192666024702   0.100410683283289   0.095165209985802

  Columns 26 through 30

   0.089220842707394   0.082058217956275   0.071883591191882   0.002313560872596   0.001945546216025

  Columns 31 through 35

   0.001674101450011   0.001462295851387   0.001291014114525   0.001149025277616   0.001029151935991

  Columns 36 through 40

   0.000926522561608   0.000837677258862   0.000760070042906   0.000691773315436   0.000631293144879

  Columns 41 through 45

   0.000577448865893   0.000529291818456   0.000486048862039   0.000447082106100   0.000411859564956

  Columns 46 through 50

   0.000379933358762   0.000350923242973   0.000324503974403   0.000300395488150   0.000278355166268

  Columns 51 through 55

   0.000258171685122   0.000239660069558   0.000222657680434   0.000207020931759   0.000192622583817

  Columns 56 through 60

   0.000179349495105                   0                   0                   0                   0

  Column 61

                   0


inner_code_BER =

  Columns 1 through 5

   0.178618472275941   0.175756771893937   0.172874503078912   0.169970190484945   0.167042151571198

  Columns 6 through 10

   0.164088466907412   0.161106944448430   0.158095076167206   0.155049984911914   0.151968358622768

  Columns 11 through 15

   0.148846368010973   0.145679562314755   0.142462735565477   0.139189752529021   0.135853318478615

  Columns 16 through 20

   0.132444669074878   0.128953143859587   0.125365585468748   0.121665469378016   0.117831600977850

  Columns 21 through 25

   0.113836085829665   0.109641009809692   0.105192666024702   0.100410683283289   0.095165209985802

  Columns 26 through 30

   0.089220842707394   0.082058217956275   0.071883591191882   0.002313560872596   0.001945546216025

  Columns 31 through 35

   0.001674101450011   0.001462295851387   0.001291014114525   0.001149025277616   0.001029151935991

  Columns 36 through 40

   0.000926522561608   0.000837677258862   0.000760070042906   0.000691773315436   0.000631293144879

  Columns 41 through 45

   0.000577448865893   0.000529291818456   0.000486048862039   0.000447082106100   0.000411859564956

  Columns 46 through 50

   0.000379933358762   0.000350923242973   0.000324503974403   0.000300395488150   0.000278355166268

  Columns 51 through 55

   0.000258171685122   0.000239660069558   0.000222657680434   0.000207020931759   0.000192622583817

  Columns 56 through 60

   0.000179349495105   0.000167100742874                   0                   0                   0

  Column 61

                   0


inner_code_BER =

  Columns 1 through 5

   0.178618472275941   0.175756771893937   0.172874503078912   0.169970190484945   0.167042151571198

  Columns 6 through 10

   0.164088466907412   0.161106944448430   0.158095076167206   0.155049984911914   0.151968358622768

  Columns 11 through 15

   0.148846368010973   0.145679562314755   0.142462735565477   0.139189752529021   0.135853318478615

  Columns 16 through 20

   0.132444669074878   0.128953143859587   0.125365585468748   0.121665469378016   0.117831600977850

  Columns 21 through 25

   0.113836085829665   0.109641009809692   0.105192666024702   0.100410683283289   0.095165209985802

  Columns 26 through 30

   0.089220842707394   0.082058217956275   0.071883591191882   0.002313560872596   0.001945546216025

  Columns 31 through 35

   0.001674101450011   0.001462295851387   0.001291014114525   0.001149025277616   0.001029151935991

  Columns 36 through 40

   0.000926522561608   0.000837677258862   0.000760070042906   0.000691773315436   0.000631293144879

  Columns 41 through 45

   0.000577448865893   0.000529291818456   0.000486048862039   0.000447082106100   0.000411859564956

  Columns 46 through 50

   0.000379933358762   0.000350923242973   0.000324503974403   0.000300395488150   0.000278355166268

  Columns 51 through 55

   0.000258171685122   0.000239660069558   0.000222657680434   0.000207020931759   0.000192622583817

  Columns 56 through 60

   0.000179349495105   0.000167100742874   0.000155786042061                   0                   0

  Column 61

                   0


inner_code_BER =

  Columns 1 through 5

   0.178618472275941   0.175756771893937   0.172874503078912   0.169970190484945   0.167042151571198

  Columns 6 through 10

   0.164088466907412   0.161106944448430   0.158095076167206   0.155049984911914   0.151968358622768

  Columns 11 through 15

   0.148846368010973   0.145679562314755   0.142462735565477   0.139189752529021   0.135853318478615

  Columns 16 through 20

   0.132444669074878   0.128953143859587   0.125365585468748   0.121665469378016   0.117831600977850

  Columns 21 through 25

   0.113836085829665   0.109641009809692   0.105192666024702   0.100410683283289   0.095165209985802

  Columns 26 through 30

   0.089220842707394   0.082058217956275   0.071883591191882   0.002313560872596   0.001945546216025

  Columns 31 through 35

   0.001674101450011   0.001462295851387   0.001291014114525   0.001149025277616   0.001029151935991

  Columns 36 through 40

   0.000926522561608   0.000837677258862   0.000760070042906   0.000691773315436   0.000631293144879

  Columns 41 through 45

   0.000577448865893   0.000529291818456   0.000486048862039   0.000447082106100   0.000411859564956

  Columns 46 through 50

   0.000379933358762   0.000350923242973   0.000324503974403   0.000300395488150   0.000278355166268

  Columns 51 through 55

   0.000258171685122   0.000239660069558   0.000222657680434   0.000207020931759   0.000192622583817

  Columns 56 through 60

   0.000179349495105   0.000167100742874   0.000155786042061   0.000145324407577                   0

  Column 61

                   0


inner_code_BER =

  Columns 1 through 5

   0.178618472275941   0.175756771893937   0.172874503078912   0.169970190484945   0.167042151571198

  Columns 6 through 10

   0.164088466907412   0.161106944448430   0.158095076167206   0.155049984911914   0.151968358622768

  Columns 11 through 15

   0.148846368010973   0.145679562314755   0.142462735565477   0.139189752529021   0.135853318478615

  Columns 16 through 20

   0.132444669074878   0.128953143859587   0.125365585468748   0.121665469378016   0.117831600977850

  Columns 21 through 25

   0.113836085829665   0.109641009809692   0.105192666024702   0.100410683283289   0.095165209985802

  Columns 26 through 30

   0.089220842707394   0.082058217956275   0.071883591191882   0.002313560872596   0.001945546216025

  Columns 31 through 35

   0.001674101450011   0.001462295851387   0.001291014114525   0.001149025277616   0.001029151935991

  Columns 36 through 40

   0.000926522561608   0.000837677258862   0.000760070042906   0.000691773315436   0.000631293144879

  Columns 41 through 45

   0.000577448865893   0.000529291818456   0.000486048862039   0.000447082106100   0.000411859564956

  Columns 46 through 50

   0.000379933358762   0.000350923242973   0.000324503974403   0.000300395488150   0.000278355166268

  Columns 51 through 55

   0.000258171685122   0.000239660069558   0.000222657680434   0.000207020931759   0.000192622583817

  Columns 56 through 60

   0.000179349495105   0.000167100742874   0.000155786042061   0.000145324407577   0.000135643016397

  Column 61

                   0


inner_code_BER =

  Columns 1 through 5

   0.178618472275941   0.175756771893937   0.172874503078912   0.169970190484945   0.167042151571198

  Columns 6 through 10

   0.164088466907412   0.161106944448430   0.158095076167206   0.155049984911914   0.151968358622768

  Columns 11 through 15

   0.148846368010973   0.145679562314755   0.142462735565477   0.139189752529021   0.135853318478615

  Columns 16 through 20

   0.132444669074878   0.128953143859587   0.125365585468748   0.121665469378016   0.117831600977850

  Columns 21 through 25

   0.113836085829665   0.109641009809692   0.105192666024702   0.100410683283289   0.095165209985802

  Columns 26 through 30

   0.089220842707394   0.082058217956275   0.071883591191882   0.002313560872596   0.001945546216025

  Columns 31 through 35

   0.001674101450011   0.001462295851387   0.001291014114525   0.001149025277616   0.001029151935991

  Columns 36 through 40

   0.000926522561608   0.000837677258862   0.000760070042906   0.000691773315436   0.000631293144879

  Columns 41 through 45

   0.000577448865893   0.000529291818456   0.000486048862039   0.000447082106100   0.000411859564956

  Columns 46 through 50

   0.000379933358762   0.000350923242973   0.000324503974403   0.000300395488150   0.000278355166268

  Columns 51 through 55

   0.000258171685122   0.000239660069558   0.000222657680434   0.000207020931759   0.000192622583817

  Columns 56 through 60

   0.000179349495105   0.000167100742874   0.000155786042061   0.000145324407577   0.000135643016397

  Column 61

   0.000126676234727

Elapsed time is 33366.588885 seconds.
