# Supplementary material for: An Efficient Design of Systematic Rateless Codes
Source: Hindawi journal article supplement (doi:10.1155/2020/8068414), 2020-05-19
Supplement: f1 [file 8068414.f1.zip › supplementary files/Matlab_code_for_Figure1/BER_by_DDE/仿真结果/BER_by_DDE_rician_rate_1_2_dist0_Ns.txt]

µ±Ç°ÐÅµÀÎªÀµË¹ÐÅµÀ£¬²ÎÊýgamma=2

EbN0indB_vec =

  Columns 1 through 5

                   0   0.100000000000000   0.200000000000000   0.300000000000000   0.400000000000000

  Columns 6 through 10

   0.500000000000000   0.600000000000000   0.700000000000000   0.800000000000000   0.900000000000000

  Columns 11 through 15

   1.000000000000000   1.100000000000000   1.200000000000000   1.300000000000000   1.400000000000000

  Columns 16 through 20

   1.500000000000000   1.600000000000000   1.700000000000000   1.800000000000000   1.900000000000000

  Column 21

   2.000000000000000

ÖÆ±í³É¹¦
µ±Ç°Ñ¡ÔñRaptorÂë
µ±Ç°Ñ¡Ôñ·ÇÏµÍ³Âë
×ÜÂëÂÊ=0.50000, ÍâÂëÂëÂÊ=0.98039, ÄÚÂëÂëÂÊ=0.51000

out_node_index =

     1     2     3     4     5     8     9    19    65    66


ans =

  Columns 1 through 5

   0.007969000000000   0.493570000000000   0.166220000000000   0.072646000000000   0.082558000000000

  Columns 6 through 10

   0.056058000000000   0.037229000000000   0.055590000000000   0.025023000000000   0.003135000000000


inner_code_BER =

  Columns 1 through 5

   0.407985073568425                   0                   0                   0                   0

  Columns 6 through 10

                   0                   0                   0                   0                   0

  Columns 11 through 15

                   0                   0                   0                   0                   0

  Columns 16 through 20

                   0                   0                   0                   0                   0

  Column 21

                   0


outer_code_BER =

  Columns 1 through 5

   0.407985073568425                   0                   0                   0                   0

  Columns 6 through 10

                   0                   0                   0                   0                   0

  Columns 11 through 15

                   0                   0                   0                   0                   0

  Columns 16 through 20

                   0                   0                   0                   0                   0

  Column 21

                   0


inner_code_BER =

  Columns 1 through 5

   0.407985073568425   0.399737729863268                   0                   0                   0

  Columns 6 through 10

                   0                   0                   0                   0                   0

  Columns 11 through 15

                   0                   0                   0                   0                   0

  Columns 16 through 20

                   0                   0                   0                   0                   0

  Column 21

                   0


outer_code_BER =

  Columns 1 through 5

   0.407985073568425   0.399737729863268                   0                   0                   0

  Columns 6 through 10

                   0                   0                   0                   0                   0

  Columns 11 through 15

                   0                   0                   0                   0                   0

  Columns 16 through 20

                   0                   0                   0                   0                   0

  Column 21

                   0


inner_code_BER =

  Columns 1 through 5

   0.407985073568425   0.399737729863268   0.390114763784327                   0                   0

  Columns 6 through 10

                   0                   0                   0                   0                   0

  Columns 11 through 15

                   0                   0                   0                   0                   0

  Columns 16 through 20

                   0                   0                   0                   0                   0

  Column 21

                   0


outer_code_BER =

  Columns 1 through 5

   0.407985073568425   0.399737729863268   0.390114763784327                   0                   0

  Columns 6 through 10

                   0                   0                   0                   0                   0

  Columns 11 through 15

                   0                   0                   0                   0                   0

  Columns 16 through 20

                   0                   0                   0                   0                   0

  Column 21

                   0


inner_code_BER =

  Columns 1 through 5

   0.407985073568425   0.399737729863268   0.390114763784327   0.378761879879940                   0

  Columns 6 through 10

                   0                   0                   0                   0                   0

  Columns 11 through 15

                   0                   0                   0                   0                   0

  Columns 16 through 20

                   0                   0                   0                   0                   0

  Column 21

                   0


outer_code_BER =

  Columns 1 through 5

   0.407985073568425   0.399737729863268   0.390114763784327   0.378761879879940                   0

  Columns 6 through 10

                   0                   0                   0                   0                   0

  Columns 11 through 15

                   0                   0                   0                   0                   0

  Columns 16 through 20

                   0                   0                   0                   0                   0

  Column 21

                   0


inner_code_BER =

  Columns 1 through 5

   0.407985073568425   0.399737729863268   0.390114763784327   0.378761879879940   0.365218364306548

  Columns 6 through 10

                   0                   0                   0                   0                   0

  Columns 11 through 15

                   0                   0                   0                   0                   0

  Columns 16 through 20

                   0                   0                   0                   0                   0

  Column 21

                   0


outer_code_BER =

  Columns 1 through 5

   0.407985073568425   0.399737729863268   0.390114763784327   0.378761879879940   0.365218364306548

  Columns 6 through 10

                   0                   0                   0                   0                   0

  Columns 11 through 15

                   0                   0                   0                   0                   0

  Columns 16 through 20

                   0                   0                   0                   0                   0

  Column 21

                   0


inner_code_BER =

  Columns 1 through 5

   0.407985073568425   0.399737729863268   0.390114763784327   0.378761879879940   0.365218364306548

  Columns 6 through 10

   0.348894728641558                   0                   0                   0                   0

  Columns 11 through 15

                   0                   0                   0                   0                   0

  Columns 16 through 20

                   0                   0                   0                   0                   0

  Column 21

                   0


outer_code_BER =

  Columns 1 through 5

   0.407985073568425   0.399737729863268   0.390114763784327   0.378761879879940   0.365218364306548

  Columns 6 through 10

   0.348894728641558                   0                   0                   0                   0

  Columns 11 through 15

                   0                   0                   0                   0                   0

  Columns 16 through 20

                   0                   0                   0                   0                   0

  Column 21

                   0


inner_code_BER =

  Columns 1 through 5

   0.407985073568425   0.399737729863268   0.390114763784327   0.378761879879940   0.365218364306548

  Columns 6 through 10

   0.348894728641558   0.329063753685713                   0                   0                   0

  Columns 11 through 15

                   0                   0                   0                   0                   0

  Columns 16 through 20

                   0                   0                   0                   0                   0

  Column 21

                   0


outer_code_BER =

  Columns 1 through 5

   0.407985073568425   0.399737729863268   0.390114763784327   0.378761879879940   0.365218364306548

  Columns 6 through 10

   0.348894728641558   0.329063753685713                   0                   0                   0

  Columns 11 through 15

                   0                   0                   0                   0                   0

  Columns 16 through 20

                   0                   0                   0                   0                   0

  Column 21

                   0


inner_code_BER =

  Columns 1 through 5

   0.407985073568425   0.399737729863268   0.390114763784327   0.378761879879940   0.365218364306548

  Columns 6 through 10

   0.348894728641558   0.329063753685713   0.304898306775474                   0                   0

  Columns 11 through 15

                   0                   0                   0                   0                   0

  Columns 16 through 20

                   0                   0                   0                   0                   0

  Column 21

                   0


outer_code_BER =

  Columns 1 through 5

   0.407985073568425   0.399737729863268   0.390114763784327   0.378761879879940   0.365218364306548

  Columns 6 through 10

   0.348894728641558   0.329063753685713   0.304898306775474                   0                   0

  Columns 11 through 15

                   0                   0                   0                   0                   0

  Columns 16 through 20

                   0                   0                   0                   0                   0

  Column 21

                   0


inner_code_BER =

  Columns 1 through 5

   0.407985073568425   0.399737729863268   0.390114763784327   0.378761879879940   0.365218364306548

  Columns 6 through 10

   0.348894728641558   0.329063753685713   0.304898306775474   0.275620579415850                   0

  Columns 11 through 15

                   0                   0                   0                   0                   0

  Columns 16 through 20

                   0                   0                   0                   0                   0

  Column 21

                   0


outer_code_BER =

  Columns 1 through 5

   0.407985073568425   0.399737729863268   0.390114763784327   0.378761879879940   0.365218364306548

  Columns 6 through 10

   0.348894728641558   0.329063753685713   0.304898306775474   0.275620579415851                   0

  Columns 11 through 15

                   0                   0                   0                   0                   0

  Columns 16 through 20

                   0                   0                   0                   0                   0

  Column 21

                   0


inner_code_BER =

  Columns 1 through 5

   0.407985073568425   0.399737729863268   0.390114763784327   0.378761879879940   0.365218364306548

  Columns 6 through 10

   0.348894728641558   0.329063753685713   0.304898306775474   0.275620579415850   0.240826173423957

  Columns 11 through 15

                   0                   0                   0                   0                   0

  Columns 16 through 20

                   0                   0                   0                   0                   0

  Column 21

                   0


outer_code_BER =

  Columns 1 through 5

   0.407985073568425   0.399737729863268   0.390114763784327   0.378761879879940   0.365218364306548

  Columns 6 through 10

   0.348894728641558   0.329063753685713   0.304898306775474   0.275620579415851   0.240826173423957

  Columns 11 through 15

                   0                   0                   0                   0                   0

  Columns 16 through 20

                   0                   0                   0                   0                   0

  Column 21

                   0


inner_code_BER =

  Columns 1 through 5

   0.407985073568425   0.399737729863268   0.390114763784327   0.378761879879940   0.365218364306548

  Columns 6 through 10

   0.348894728641558   0.329063753685713   0.304898306775474   0.275620579415850   0.240826173423957

  Columns 11 through 15

   0.200827196941285                   0                   0                   0                   0

  Columns 16 through 20

                   0                   0                   0                   0                   0

  Column 21

                   0


outer_code_BER =

  Columns 1 through 5

   0.407985073568425   0.399737729863268   0.390114763784327   0.378761879879940   0.365218364306548

  Columns 6 through 10

   0.348894728641558   0.329063753685713   0.304898306775474   0.275620579415851   0.240826173423957

  Columns 11 through 15

   0.200827196941286                   0                   0                   0                   0

  Columns 16 through 20

                   0                   0                   0                   0                   0

  Column 21

                   0


inner_code_BER =

  Columns 1 through 5

   0.407985073568425   0.399737729863268   0.390114763784327   0.378761879879940   0.365218364306548

  Columns 6 through 10

   0.348894728641558   0.329063753685713   0.304898306775474   0.275620579415850   0.240826173423957

  Columns 11 through 15

   0.200827196941285   0.156666002635738                   0                   0                   0

  Columns 16 through 20

                   0                   0                   0                   0                   0

  Column 21

                   0


outer_code_BER =

  Columns 1 through 5

   0.407985073568425   0.399737729863268   0.390114763784327   0.378761879879940   0.365218364306548

  Columns 6 through 10

   0.348894728641558   0.329063753685713   0.304898306775474   0.275620579415851   0.240826173423957

  Columns 11 through 15

   0.200827196941286   0.156666002635738                   0                   0                   0

  Columns 16 through 20

                   0                   0                   0                   0                   0

  Column 21

                   0


inner_code_BER =

  Columns 1 through 5

   0.407985073568425   0.399737729863268   0.390114763784327   0.378761879879940   0.365218364306548

  Columns 6 through 10

   0.348894728641558   0.329063753685713   0.304898306775474   0.275620579415850   0.240826173423957

  Columns 11 through 15

   0.200827196941285   0.156666002635738   0.111096789616067                   0                   0

  Columns 16 through 20

                   0                   0                   0                   0                   0

  Column 21

                   0


outer_code_BER =

  Columns 1 through 5

   0.407985073568425   0.399737729863268   0.390114763784327   0.378761879879940   0.365218364306548

  Columns 6 through 10

   0.348894728641558   0.329063753685713   0.304898306775474   0.275620579415851   0.240826173423957

  Columns 11 through 15

   0.200827196941286   0.156666002635738   0.111096789616068                   0                   0

  Columns 16 through 20

                   0                   0                   0                   0                   0

  Column 21

                   0


inner_code_BER =

  Columns 1 through 5

   0.407985073568425   0.399737729863268   0.390114763784327   0.378761879879940   0.365218364306548

  Columns 6 through 10

   0.348894728641558   0.329063753685713   0.304898306775474   0.275620579415850   0.240826173423957

  Columns 11 through 15

   0.200827196941285   0.156666002635738   0.111096789616067   0.068511022311523                   0

  Columns 16 through 20

                   0                   0                   0                   0                   0

  Column 21

                   0


outer_code_BER =

  Columns 1 through 5

   0.407985073568425   0.399737729863268   0.390114763784327   0.378761879879940   0.365218364306548

  Columns 6 through 10

   0.348894728641558   0.329063753685713   0.304898306775474   0.275620579415851   0.240826173423957

  Columns 11 through 15

   0.200827196941286   0.156666002635738   0.111096789616068   0.068511022311587                   0

  Columns 16 through 20

                   0                   0                   0                   0                   0

  Column 21

                   0


inner_code_BER =

  Columns 1 through 5

   0.407985073568425   0.399737729863268   0.390114763784327   0.378761879879940   0.365218364306548

  Columns 6 through 10

   0.348894728641558   0.329063753685713   0.304898306775474   0.275620579415850   0.240826173423957

  Columns 11 through 15

   0.200827196941285   0.156666002635738   0.111096789616067   0.068511022311523   0.030292038535640

  Columns 16 through 20

                   0                   0                   0                   0                   0

  Column 21

                   0


outer_code_BER =

  Columns 1 through 5

   0.407985073568425   0.399737729863268   0.390114763784327   0.378761879879940   0.365218364306548

  Columns 6 through 10

   0.348894728641558   0.329063753685713   0.304898306775474   0.275620579415851   0.240826173423957

  Columns 11 through 15

   0.200827196941286   0.156666002635738   0.111096789616068   0.068511022311587   0.030292074410766

  Columns 16 through 20

                   0                   0                   0                   0                   0

  Column 21

                   0


inner_code_BER =

  Columns 1 through 5

   0.407985073568425   0.399737729863268   0.390114763784327   0.378761879879940   0.365218364306548

  Columns 6 through 10

   0.348894728641558   0.329063753685713   0.304898306775474   0.275620579415850   0.240826173423957

  Columns 11 through 15

   0.200827196941285   0.156666002635738   0.111096789616067   0.068511022311523   0.030292038535640

  Columns 16 through 20

   0.002453862197233                   0                   0                   0                   0

  Column 21

                   0


outer_code_BER =

  Columns 1 through 5

   0.407985073568425   0.399737729863268   0.390114763784327   0.378761879879940   0.365218364306548

  Columns 6 through 10

   0.348894728641558   0.329063753685713   0.304898306775474   0.275620579415851   0.240826173423957

  Columns 11 through 15

   0.200827196941286   0.156666002635738   0.111096789616068   0.068511022311587   0.030292074410766

  Columns 16 through 20

   0.000000790385397                   0                   0                   0                   0

  Column 21

                   0

µ±Ç°ÍâÂëÎóÂëÂÊÒÑµÍÓÚÄ¿±êÎóÂëÂÊ£¬ÐÅÔë±ÈÎª1.50 dB

inner_code_BER =

  Columns 1 through 5

   0.407985073568425   0.399737729863268   0.390114763784327   0.378761879879940   0.365218364306548

  Columns 6 through 10

   0.348894728641558   0.329063753685713   0.304898306775474   0.275620579415850   0.240826173423957

  Columns 11 through 15

   0.200827196941285   0.156666002635738   0.111096789616067   0.068511022311523   0.030292038535640

  Columns 16 through 20

   0.002453862197233   0.001958862088367                   0                   0                   0

  Column 21

                   0


inner_code_BER =

  Columns 1 through 5

   0.407985073568425   0.399737729863268   0.390114763784327   0.378761879879940   0.365218364306548

  Columns 6 through 10

   0.348894728641558   0.329063753685713   0.304898306775474   0.275620579415850   0.240826173423957

  Columns 11 through 15

   0.200827196941285   0.156666002635738   0.111096789616067   0.068511022311523   0.030292038535640

  Columns 16 through 20

   0.002453862197233   0.001958862088367   0.001631972854210                   0                   0

  Column 21

                   0


inner_code_BER =

  Columns 1 through 5

   0.407985073568425   0.399737729863268   0.390114763784327   0.378761879879940   0.365218364306548

  Columns 6 through 10

   0.348894728641558   0.329063753685713   0.304898306775474   0.275620579415850   0.240826173423957

  Columns 11 through 15

   0.200827196941285   0.156666002635738   0.111096789616067   0.068511022311523   0.030292038535640

  Columns 16 through 20

   0.002453862197233   0.001958862088367   0.001631972854210   0.001391984689489                   0

  Column 21

                   0


inner_code_BER =

  Columns 1 through 5

   0.407985073568425   0.399737729863268   0.390114763784327   0.378761879879940   0.365218364306548

  Columns 6 through 10

   0.348894728641558   0.329063753685713   0.304898306775474   0.275620579415850   0.240826173423957

  Columns 11 through 15

   0.200827196941285   0.156666002635738   0.111096789616067   0.068511022311523   0.030292038535640

  Columns 16 through 20

   0.002453862197233   0.001958862088367   0.001631972854210   0.001391984689489   0.001205527411074

  Column 21

                   0


inner_code_BER =

  Columns 1 through 5

   0.407985073568425   0.399737729863268   0.390114763784327   0.378761879879940   0.365218364306548

  Columns 6 through 10

   0.348894728641558   0.329063753685713   0.304898306775474   0.275620579415850   0.240826173423957

  Columns 11 through 15

   0.200827196941285   0.156666002635738   0.111096789616067   0.068511022311523   0.030292038535640

  Columns 16 through 20

   0.002453862197233   0.001958862088367   0.001631972854210   0.001391984689489   0.001205527411074

  Column 21

   0.001055427168995

Elapsed time is 16022.105808 seconds.
