# Supplementary material for: An Efficient Design of Systematic Rateless Codes
Source: Hindawi journal article supplement (doi:10.1155/2020/8068414), 2020-05-19
Supplement: f1 [file 8068414.f1.zip › supplementary files/Matlab_code_for_Figure1/BER_by_DDE/仿真结果/BER_by_DDE_rician_rate_1_2_dist0_s.txt]

��ǰ�ŵ�Ϊ��˹�ŵ�������gamma=2

EbN0indB_vec =

  Columns 1 through 5

                   0   0.100000000000000   0.200000000000000   0.300000000000000   0.400000000000000

  Columns 6 through 10

   0.500000000000000   0.600000000000000   0.700000000000000   0.800000000000000   0.900000000000000

  Columns 11 through 15

   1.000000000000000   1.100000000000000   1.200000000000000   1.300000000000000   1.400000000000000

  Columns 16 through 20

   1.500000000000000   1.600000000000000   1.700000000000000   1.800000000000000   1.900000000000000

  Columns 21 through 25

   2.000000000000000   2.100000000000000   2.200000000000000   2.300000000000000   2.400000000000000

  Columns 26 through 30

   2.500000000000000   2.600000000000000   2.700000000000000   2.800000000000000   2.900000000000000

  Columns 31 through 35

   3.000000000000000   3.100000000000000   3.200000000000000   3.300000000000000   3.400000000000000

  Columns 36 through 40

   3.500000000000000   3.600000000000000   3.700000000000000   3.800000000000000   3.900000000000000

  Columns 41 through 45

   4.000000000000000   4.100000000000000   4.200000000000000   4.300000000000000   4.400000000000000

  Columns 46 through 50

   4.500000000000000   4.600000000000000   4.700000000000000   4.800000000000000   4.900000000000000

  Columns 51 through 55

   5.000000000000000   5.100000000000000   5.200000000000000   5.300000000000000   5.400000000000000

  Columns 56 through 60

   5.500000000000000   5.600000000000000   5.700000000000000   5.800000000000000   5.900000000000000

  Column 61

   6.000000000000000

�Ʊ��ɹ�
��ǰѡ��Raptor��
��ǰѡ��ϵͳ��
������=0.50000, ��������=0.98039, ��������=0.51000

out_node_index =

     1     2     3     4     5     8     9    19    65    66


ans =

  Columns 1 through 5

   0.007969000000000   0.493570000000000   0.166220000000000   0.072646000000000   0.082558000000000

  Columns 6 through 10

   0.056058000000000   0.037229000000000   0.055590000000000   0.025023000000000   0.003135000000000


inner_code_BER =

  Columns 1 through 5

   0.119815235522945                   0                   0                   0                   0

  Columns 6 through 10

                   0                   0                   0                   0                   0

  Columns 11 through 15

                   0                   0                   0                   0                   0

  Columns 16 through 20

                   0                   0                   0                   0                   0

  Columns 21 through 25

                   0                   0                   0                   0                   0

  Columns 26 through 30

                   0                   0                   0                   0                   0

  Columns 31 through 35

                   0                   0                   0                   0                   0

  Columns 36 through 40

                   0                   0                   0                   0                   0

  Columns 41 through 45

                   0                   0                   0                   0                   0

  Columns 46 through 50

                   0                   0                   0                   0                   0

  Columns 51 through 55

                   0                   0                   0                   0                   0

  Columns 56 through 60

                   0                   0                   0                   0                   0

  Column 61

                   0


outer_code_BER =

  Columns 1 through 5

   0.119815235522946                   0                   0                   0                   0

  Columns 6 through 10

                   0                   0                   0                   0                   0

  Columns 11 through 15

                   0                   0                   0                   0                   0

  Columns 16 through 20

                   0                   0                   0                   0                   0

  Columns 21 through 25

                   0                   0                   0                   0                   0

  Columns 26 through 30

                   0                   0                   0                   0                   0

  Columns 31 through 35

                   0                   0                   0                   0                   0

  Columns 36 through 40

                   0                   0                   0                   0                   0

  Columns 41 through 45

                   0                   0                   0                   0                   0

  Columns 46 through 50

                   0                   0                   0                   0                   0

  Columns 51 through 55

                   0                   0                   0                   0                   0

  Columns 56 through 60

                   0                   0                   0                   0                   0

  Column 61

                   0


inner_code_BER =

  Columns 1 through 5

   0.119815235522945   0.116294245155329                   0                   0                   0

  Columns 6 through 10

                   0                   0                   0                   0                   0

  Columns 11 through 15

                   0                   0                   0                   0                   0

  Columns 16 through 20

                   0                   0                   0                   0                   0

  Columns 21 through 25

                   0                   0                   0                   0                   0

  Columns 26 through 30

                   0                   0                   0                   0                   0

  Columns 31 through 35

                   0                   0                   0                   0                   0

  Columns 36 through 40

                   0                   0                   0                   0                   0

  Columns 41 through 45

                   0                   0                   0                   0                   0

  Columns 46 through 50

                   0                   0                   0                   0                   0

  Columns 51 through 55

                   0                   0                   0                   0                   0

  Columns 56 through 60

                   0                   0                   0                   0                   0

  Column 61

                   0


outer_code_BER =

  Columns 1 through 5

   0.119815235522946   0.116294245155329                   0                   0                   0

  Columns 6 through 10

                   0                   0                   0                   0                   0

  Columns 11 through 15

                   0                   0                   0                   0                   0

  Columns 16 through 20

                   0                   0                   0                   0                   0

  Columns 21 through 25

                   0                   0                   0                   0                   0

  Columns 26 through 30

                   0                   0                   0                   0                   0

  Columns 31 through 35

                   0                   0                   0                   0                   0

  Columns 36 through 40

                   0                   0                   0                   0                   0

  Columns 41 through 45

                   0                   0                   0                   0                   0

  Columns 46 through 50

                   0                   0                   0                   0                   0

  Columns 51 through 55

                   0                   0                   0                   0                   0

  Columns 56 through 60

                   0                   0                   0                   0                   0

  Column 61

                   0


inner_code_BER =

  Columns 1 through 5

   0.119815235522945   0.116294245155329   0.112786006101737                   0                   0

  Columns 6 through 10

                   0                   0                   0                   0                   0

  Columns 11 through 15

                   0                   0                   0                   0                   0

  Columns 16 through 20

                   0                   0                   0                   0                   0

  Columns 21 through 25

                   0                   0                   0                   0                   0

  Columns 26 through 30

                   0                   0                   0                   0                   0

  Columns 31 through 35

                   0                   0                   0                   0                   0

  Columns 36 through 40

                   0                   0                   0                   0                   0

  Columns 41 through 45

                   0                   0                   0                   0                   0

  Columns 46 through 50

                   0                   0                   0                   0                   0

  Columns 51 through 55

                   0                   0                   0                   0                   0

  Columns 56 through 60

                   0                   0                   0                   0                   0

  Column 61

                   0


outer_code_BER =

  Columns 1 through 5

   0.119815235522946   0.116294245155329   0.112786006101737                   0                   0

  Columns 6 through 10

                   0                   0                   0                   0                   0

  Columns 11 through 15

                   0                   0                   0                   0                   0

  Columns 16 through 20

                   0                   0                   0                   0                   0

  Columns 21 through 25

                   0                   0                   0                   0                   0

  Columns 26 through 30

                   0                   0                   0                   0                   0

  Columns 31 through 35

                   0                   0                   0                   0                   0

  Columns 36 through 40

                   0                   0                   0                   0                   0

  Columns 41 through 45

                   0                   0                   0                   0                   0

  Columns 46 through 50

                   0                   0                   0                   0                   0

  Columns 51 through 55

                   0                   0                   0                   0                   0

  Columns 56 through 60

                   0                   0                   0                   0                   0

  Column 61

                   0


inner_code_BER =

  Columns 1 through 5

   0.119815235522945   0.116294245155329   0.112786006101737   0.109292813109344                   0

  Columns 6 through 10

                   0                   0                   0                   0                   0

  Columns 11 through 15

                   0                   0                   0                   0                   0

  Columns 16 through 20

                   0                   0                   0                   0                   0

  Columns 21 through 25

                   0                   0                   0                   0                   0

  Columns 26 through 30

                   0                   0                   0                   0                   0

  Columns 31 through 35

                   0                   0                   0                   0                   0

  Columns 36 through 40

                   0                   0                   0                   0                   0

  Columns 41 through 45

                   0                   0                   0                   0                   0

  Columns 46 through 50

                   0                   0                   0                   0                   0

  Columns 51 through 55

                   0                   0                   0                   0                   0

  Columns 56 through 60

                   0                   0                   0                   0                   0

  Column 61

                   0


outer_code_BER =

  Columns 1 through 5

   0.119815235522946   0.116294245155329   0.112786006101737   0.109292813109344                   0

  Columns 6 through 10

                   0                   0                   0                   0                   0

  Columns 11 through 15

                   0                   0                   0                   0                   0

  Columns 16 through 20

                   0                   0                   0                   0                   0

  Columns 21 through 25

                   0                   0                   0                   0                   0

  Columns 26 through 30

                   0                   0                   0                   0                   0

  Columns 31 through 35

                   0                   0                   0                   0                   0

  Columns 36 through 40

                   0                   0                   0                   0                   0

  Columns 41 through 45

                   0                   0                   0                   0                   0

  Columns 46 through 50

                   0                   0                   0                   0                   0

  Columns 51 through 55

                   0                   0                   0                   0                   0

  Columns 56 through 60

                   0                   0                   0                   0                   0

  Column 61

                   0


inner_code_BER =

  Columns 1 through 5

   0.119815235522945   0.116294245155329   0.112786006101737   0.109292813109344   0.105817019851914

  Columns 6 through 10

                   0                   0                   0                   0                   0

  Columns 11 through 15

                   0                   0                   0                   0                   0

  Columns 16 through 20

                   0                   0                   0                   0                   0

  Columns 21 through 25

                   0                   0                   0                   0                   0

  Columns 26 through 30

                   0                   0                   0                   0                   0

  Columns 31 through 35

                   0                   0                   0                   0                   0

  Columns 36 through 40

                   0                   0                   0                   0                   0

  Columns 41 through 45

                   0                   0                   0                   0                   0

  Columns 46 through 50

                   0                   0                   0                   0                   0

  Columns 51 through 55

                   0                   0                   0                   0                   0

  Columns 56 through 60

                   0                   0                   0                   0                   0

  Column 61

                   0


outer_code_BER =

  Columns 1 through 5

   0.119815235522946   0.116294245155329   0.112786006101737   0.109292813109344   0.105817019851914

  Columns 6 through 10

                   0                   0                   0                   0                   0

  Columns 11 through 15

                   0                   0                   0                   0                   0

  Columns 16 through 20

                   0                   0                   0                   0                   0

  Columns 21 through 25

                   0                   0                   0                   0                   0

  Columns 26 through 30

                   0                   0                   0                   0                   0

  Columns 31 through 35

                   0                   0                   0                   0                   0

  Columns 36 through 40

                   0                   0                   0                   0                   0

  Columns 41 through 45

                   0                   0                   0                   0                   0

  Columns 46 through 50

                   0                   0                   0                   0                   0

  Columns 51 through 55

                   0                   0                   0                   0                   0

  Columns 56 through 60

                   0                   0                   0                   0                   0

  Column 61

                   0


inner_code_BER =

  Columns 1 through 5

   0.119815235522945   0.116294245155329   0.112786006101737   0.109292813109344   0.105817019851914

  Columns 6 through 10

   0.102361006903491                   0                   0                   0                   0

  Columns 11 through 15

                   0                   0                   0                   0                   0

  Columns 16 through 20

                   0                   0                   0                   0                   0

  Columns 21 through 25

                   0                   0                   0                   0                   0

  Columns 26 through 30

                   0                   0                   0                   0                   0

  Columns 31 through 35

                   0                   0                   0                   0                   0

  Columns 36 through 40

                   0                   0                   0                   0                   0

  Columns 41 through 45

                   0                   0                   0                   0                   0

  Columns 46 through 50

                   0                   0                   0                   0                   0

  Columns 51 through 55

                   0                   0                   0                   0                   0

  Columns 56 through 60

                   0                   0                   0                   0                   0

  Column 61

                   0


outer_code_BER =

  Columns 1 through 5

   0.119815235522946   0.116294245155329   0.112786006101737   0.109292813109344   0.105817019851914

  Columns 6 through 10

   0.102361006903492                   0                   0                   0                   0

  Columns 11 through 15

                   0                   0                   0                   0                   0

  Columns 16 through 20

                   0                   0                   0                   0                   0

  Columns 21 through 25

                   0                   0                   0                   0                   0

  Columns 26 through 30

                   0                   0                   0                   0                   0

  Columns 31 through 35

                   0                   0                   0                   0                   0

  Columns 36 through 40

                   0                   0                   0                   0                   0

  Columns 41 through 45

                   0                   0                   0                   0                   0

  Columns 46 through 50

                   0                   0                   0                   0                   0

  Columns 51 through 55

                   0                   0                   0                   0                   0

  Columns 56 through 60

                   0                   0                   0                   0                   0

  Column 61

                   0


inner_code_BER =

  Columns 1 through 5

   0.119815235522945   0.116294245155329   0.112786006101737   0.109292813109344   0.105817019851914

  Columns 6 through 10

   0.102361006903491   0.098927188207309                   0                   0                   0

  Columns 11 through 15

                   0                   0                   0                   0                   0

  Columns 16 through 20

                   0                   0                   0                   0                   0

  Columns 21 through 25

                   0                   0                   0                   0                   0

  Columns 26 through 30

                   0                   0                   0                   0                   0

  Columns 31 through 35

                   0                   0                   0                   0                   0

  Columns 36 through 40

                   0                   0                   0                   0                   0

  Columns 41 through 45

                   0                   0                   0                   0                   0

  Columns 46 through 50

                   0                   0                   0                   0                   0

  Columns 51 through 55

                   0                   0                   0                   0                   0

  Columns 56 through 60

                   0                   0                   0                   0                   0

  Column 61

                   0


outer_code_BER =

  Columns 1 through 5

   0.119815235522946   0.116294245155329   0.112786006101737   0.109292813109344   0.105817019851914

  Columns 6 through 10

   0.102361006903492   0.098927188207309                   0                   0                   0

  Columns 11 through 15

                   0                   0                   0                   0                   0

  Columns 16 through 20

                   0                   0                   0                   0                   0

  Columns 21 through 25

                   0                   0                   0                   0                   0

  Columns 26 through 30

                   0                   0                   0                   0                   0

  Columns 31 through 35

                   0                   0                   0                   0                   0

  Columns 36 through 40

                   0                   0                   0                   0                   0

  Columns 41 through 45

                   0                   0                   0                   0                   0

  Columns 46 through 50

                   0                   0                   0                   0                   0

  Columns 51 through 55

                   0                   0                   0                   0                   0

  Columns 56 through 60

                   0                   0                   0                   0                   0

  Column 61

                   0


inner_code_BER =

  Columns 1 through 5

   0.119815235522945   0.116294245155329   0.112786006101737   0.109292813109344   0.105817019851914

  Columns 6 through 10

   0.102361006903491   0.098927188207309   0.095517993886343                   0                   0

  Columns 11 through 15

                   0                   0                   0                   0                   0

  Columns 16 through 20

                   0                   0                   0                   0                   0

  Columns 21 through 25

                   0                   0                   0                   0                   0

  Columns 26 through 30

                   0                   0                   0                   0                   0

  Columns 31 through 35

                   0                   0                   0                   0                   0

  Columns 36 through 40

                   0                   0                   0                   0                   0

  Columns 41 through 45

                   0                   0                   0                   0                   0

  Columns 46 through 50

                   0                   0                   0                   0                   0

  Columns 51 through 55

                   0                   0                   0                   0                   0

  Columns 56 through 60

                   0                   0                   0                   0                   0

  Column 61

                   0


outer_code_BER =

  Columns 1 through 5

   0.119815235522946   0.116294245155329   0.112786006101737   0.109292813109344   0.105817019851914

  Columns 6 through 10

   0.102361006903492   0.098927188207309   0.095517993886343                   0                   0

  Columns 11 through 15

                   0                   0                   0                   0                   0

  Columns 16 through 20

                   0                   0                   0                   0                   0

  Columns 21 through 25

                   0                   0                   0                   0                   0

  Columns 26 through 30

                   0                   0                   0                   0                   0

  Columns 31 through 35

                   0                   0                   0                   0                   0

  Columns 36 through 40

                   0                   0                   0                   0                   0

  Columns 41 through 45

                   0                   0                   0                   0                   0

  Columns 46 through 50

                   0                   0                   0                   0                   0

  Columns 51 through 55

                   0                   0                   0                   0                   0

  Columns 56 through 60

                   0                   0                   0                   0                   0

  Column 61

                   0


inner_code_BER =

  Columns 1 through 5

   0.119815235522945   0.116294245155329   0.112786006101737   0.109292813109344   0.105817019851914

  Columns 6 through 10

   0.102361006903491   0.098927188207309   0.095517993886343   0.092135879503793                   0

  Columns 11 through 15

                   0                   0                   0                   0                   0

  Columns 16 through 20

                   0                   0                   0                   0                   0

  Columns 21 through 25

                   0                   0                   0                   0                   0

  Columns 26 through 30

                   0                   0                   0                   0                   0

  Columns 31 through 35

                   0                   0                   0                   0                   0

  Columns 36 through 40

                   0                   0                   0                   0                   0

  Columns 41 through 45

                   0                   0                   0                   0                   0

  Columns 46 through 50

                   0                   0                   0                   0                   0

  Columns 51 through 55

                   0                   0                   0                   0                   0

  Columns 56 through 60

                   0                   0                   0                   0                   0

  Column 61

                   0


outer_code_BER =

  Columns 1 through 5

   0.119815235522946   0.116294245155329   0.112786006101737   0.109292813109344   0.105817019851914

  Columns 6 through 10

   0.102361006903492   0.098927188207309   0.095517993886343   0.092135879503793                   0

  Columns 11 through 15

                   0                   0                   0                   0                   0

  Columns 16 through 20

                   0                   0                   0                   0                   0

  Columns 21 through 25

                   0                   0                   0                   0                   0

  Columns 26 through 30

                   0                   0                   0                   0                   0

  Columns 31 through 35

                   0                   0                   0                   0                   0

  Columns 36 through 40

                   0                   0                   0                   0                   0

  Columns 41 through 45

                   0                   0                   0                   0                   0

  Columns 46 through 50

                   0                   0                   0                   0                   0

  Columns 51 through 55

                   0                   0                   0                   0                   0

  Columns 56 through 60

                   0                   0                   0                   0                   0

  Column 61

                   0


inner_code_BER =

  Columns 1 through 5

   0.119815235522945   0.116294245155329   0.112786006101737   0.109292813109344   0.105817019851914

  Columns 6 through 10

   0.102361006903491   0.098927188207309   0.095517993886343   0.092135879503793   0.088783293126820

  Columns 11 through 15

                   0                   0                   0                   0                   0

  Columns 16 through 20

                   0                   0                   0                   0                   0

  Columns 21 through 25

                   0                   0                   0                   0                   0

  Columns 26 through 30

                   0                   0                   0                   0                   0

  Columns 31 through 35

                   0                   0                   0                   0                   0

  Columns 36 through 40

                   0                   0                   0                   0                   0

  Columns 41 through 45

                   0                   0                   0                   0                   0

  Columns 46 through 50

                   0                   0                   0                   0                   0

  Columns 51 through 55

                   0                   0                   0                   0                   0

  Columns 56 through 60

                   0                   0                   0                   0                   0

  Column 61

                   0


outer_code_BER =

  Columns 1 through 5

   0.119815235522946   0.116294245155329   0.112786006101737   0.109292813109344   0.105817019851914

  Columns 6 through 10

   0.102361006903492   0.098927188207309   0.095517993886343   0.092135879503793   0.088783293126820

  Columns 11 through 15

                   0                   0                   0                   0                   0

  Columns 16 through 20

                   0                   0                   0                   0                   0

  Columns 21 through 25

                   0                   0                   0                   0                   0

  Columns 26 through 30

                   0                   0                   0                   0                   0

  Columns 31 through 35

                   0                   0                   0                   0                   0

  Columns 36 through 40

                   0                   0                   0                   0                   0

  Columns 41 through 45

                   0                   0                   0                   0                   0

  Columns 46 through 50

                   0                   0                   0                   0                   0

  Columns 51 through 55

                   0                   0                   0                   0                   0

  Columns 56 through 60

                   0                   0                   0                   0                   0

  Column 61

                   0


inner_code_BER =

  Columns 1 through 5

   0.119815235522945   0.116294245155329   0.112786006101737   0.109292813109344   0.105817019851914

  Columns 6 through 10

   0.102361006903491   0.098927188207309   0.095517993886343   0.092135879503793   0.088783293126820

  Columns 11 through 15

   0.085462684979897                   0                   0                   0                   0

  Columns 16 through 20

                   0                   0                   0                   0                   0

  Columns 21 through 25

                   0                   0                   0                   0                   0

  Columns 26 through 30

                   0                   0                   0                   0                   0

  Columns 31 through 35

                   0                   0                   0                   0                   0

  Columns 36 through 40

                   0                   0                   0                   0                   0

  Columns 41 through 45

                   0                   0                   0                   0                   0

  Columns 46 through 50

                   0                   0                   0                   0                   0

  Columns 51 through 55

                   0                   0                   0                   0                   0

  Columns 56 through 60

                   0                   0                   0                   0                   0

  Column 61

                   0


outer_code_BER =

  Columns 1 through 5

   0.119815235522946   0.116294245155329   0.112786006101737   0.109292813109344   0.105817019851914

  Columns 6 through 10

   0.102361006903492   0.098927188207309   0.095517993886343   0.092135879503793   0.088783293126820

  Columns 11 through 15

   0.085462684979897                   0                   0                   0                   0

  Columns 16 through 20

                   0                   0                   0                   0                   0

  Columns 21 through 25

                   0                   0                   0                   0                   0

  Columns 26 through 30

                   0                   0                   0                   0                   0

  Columns 31 through 35

                   0                   0                   0                   0                   0

  Columns 36 through 40

                   0                   0                   0                   0                   0

  Columns 41 through 45

                   0                   0                   0                   0                   0

  Columns 46 through 50

                   0                   0                   0                   0                   0

  Columns 51 through 55

                   0                   0                   0                   0                   0

  Columns 56 through 60

                   0                   0                   0                   0                   0

  Column 61

                   0


inner_code_BER =

  Columns 1 through 5

   0.119815235522945   0.116294245155329   0.112786006101737   0.109292813109344   0.105817019851914

  Columns 6 through 10

   0.102361006903491   0.098927188207309   0.095517993886343   0.092135879503793   0.088783293126820

  Columns 11 through 15

   0.085462684979897   0.082176494184810                   0                   0                   0

  Columns 16 through 20

                   0                   0                   0                   0                   0

  Columns 21 through 25

                   0                   0                   0                   0                   0

  Columns 26 through 30

                   0                   0                   0                   0                   0

  Columns 31 through 35

                   0                   0                   0                   0                   0

  Columns 36 through 40

                   0                   0                   0                   0                   0

  Columns 41 through 45

                   0                   0                   0                   0                   0

  Columns 46 through 50

                   0                   0                   0                   0                   0

  Columns 51 through 55

                   0                   0                   0                   0                   0

  Columns 56 through 60

                   0                   0                   0                   0                   0

  Column 61

                   0


outer_code_BER =

  Columns 1 through 5

   0.119815235522946   0.116294245155329   0.112786006101737   0.109292813109344   0.105817019851914

  Columns 6 through 10

   0.102361006903492   0.098927188207309   0.095517993886343   0.092135879503793   0.088783293126820

  Columns 11 through 15

   0.085462684979897   0.082176494184811                   0                   0                   0

  Columns 16 through 20

                   0                   0                   0                   0                   0

  Columns 21 through 25

                   0                   0                   0                   0                   0

  Columns 26 through 30

                   0                   0                   0                   0                   0

  Columns 31 through 35

                   0                   0                   0                   0                   0

  Columns 36 through 40

                   0                   0                   0                   0                   0

  Columns 41 through 45

                   0                   0                   0                   0                   0

  Columns 46 through 50

                   0                   0                   0                   0                   0

  Columns 51 through 55

                   0                   0                   0                   0                   0

  Columns 56 through 60

                   0                   0                   0                   0                   0

  Column 61

                   0


inner_code_BER =

  Columns 1 through 5

   0.119815235522945   0.116294245155329   0.112786006101737   0.109292813109344   0.105817019851914

  Columns 6 through 10

   0.102361006903491   0.098927188207309   0.095517993886343   0.092135879503793   0.088783293126820

  Columns 11 through 15

   0.085462684979897   0.082176494184810   0.078927167653616                   0                   0

  Columns 16 through 20

                   0                   0                   0                   0                   0

  Columns 21 through 25

                   0                   0                   0                   0                   0

  Columns 26 through 30

                   0                   0                   0                   0                   0

  Columns 31 through 35

                   0                   0                   0                   0                   0

  Columns 36 through 40

                   0                   0                   0                   0                   0

  Columns 41 through 45

                   0                   0                   0                   0                   0

  Columns 46 through 50

                   0                   0                   0                   0                   0

  Columns 51 through 55

                   0                   0                   0                   0                   0

  Columns 56 through 60

                   0                   0                   0                   0                   0

  Column 61

                   0


outer_code_BER =

  Columns 1 through 5

   0.119815235522946   0.116294245155329   0.112786006101737   0.109292813109344   0.105817019851914

  Columns 6 through 10

   0.102361006903492   0.098927188207309   0.095517993886343   0.092135879503793   0.088783293126820

  Columns 11 through 15

   0.085462684979897   0.082176494184811   0.078927167653618                   0                   0

  Columns 16 through 20

                   0                   0                   0                   0                   0

  Columns 21 through 25

                   0                   0                   0                   0                   0

  Columns 26 through 30

                   0                   0                   0                   0                   0

  Columns 31 through 35

                   0                   0                   0                   0                   0

  Columns 36 through 40

                   0                   0                   0                   0                   0

  Columns 41 through 45

                   0                   0                   0                   0                   0

  Columns 46 through 50

                   0                   0                   0                   0                   0

  Columns 51 through 55

                   0                   0                   0                   0                   0

  Columns 56 through 60

                   0                   0                   0                   0                   0

  Column 61

                   0


inner_code_BER =

  Columns 1 through 5

   0.119815235522945   0.116294245155329   0.112786006101737   0.109292813109344   0.105817019851914

  Columns 6 through 10

   0.102361006903491   0.098927188207309   0.095517993886343   0.092135879503793   0.088783293126820

  Columns 11 through 15

   0.085462684979897   0.082176494184810   0.078927167653616   0.075717134039967                   0

  Columns 16 through 20

                   0                   0                   0                   0                   0

  Columns 21 through 25

                   0                   0                   0                   0                   0

  Columns 26 through 30

                   0                   0                   0                   0                   0

  Columns 31 through 35

                   0                   0                   0                   0                   0

  Columns 36 through 40

                   0                   0                   0                   0                   0

  Columns 41 through 45

                   0                   0                   0                   0                   0

  Columns 46 through 50

                   0                   0                   0                   0                   0

  Columns 51 through 55

                   0                   0                   0                   0                   0

  Columns 56 through 60

                   0                   0                   0                   0                   0

  Column 61

                   0


outer_code_BER =

  Columns 1 through 5

   0.119815235522946   0.116294245155329   0.112786006101737   0.109292813109344   0.105817019851914

  Columns 6 through 10

   0.102361006903492   0.098927188207309   0.095517993886343   0.092135879503793   0.088783293126820

  Columns 11 through 15

   0.085462684979897   0.082176494184811   0.078927167653618   0.075717134039974                   0

  Columns 16 through 20

                   0                   0                   0                   0                   0

  Columns 21 through 25

                   0                   0                   0                   0                   0

  Columns 26 through 30

                   0                   0                   0                   0                   0

  Columns 31 through 35

                   0                   0                   0                   0                   0

  Columns 36 through 40

                   0                   0                   0                   0                   0

  Columns 41 through 45

                   0                   0                   0                   0                   0

  Columns 46 through 50

                   0                   0                   0                   0                   0

  Columns 51 through 55

                   0                   0                   0                   0                   0

  Columns 56 through 60

                   0                   0                   0                   0                   0

  Column 61

                   0


inner_code_BER =

  Columns 1 through 5

   0.119815235522945   0.116294245155329   0.112786006101737   0.109292813109344   0.105817019851914

  Columns 6 through 10

   0.102361006903491   0.098927188207309   0.095517993886343   0.092135879503793   0.088783293126820

  Columns 11 through 15

   0.085462684979897   0.082176494184810   0.078927167653616   0.075717134039967   0.072548822976554

  Columns 16 through 20

                   0                   0                   0                   0                   0

  Columns 21 through 25

                   0                   0                   0                   0                   0

  Columns 26 through 30

                   0                   0                   0                   0                   0

  Columns 31 through 35

                   0                   0                   0                   0                   0

  Columns 36 through 40

                   0                   0                   0                   0                   0

  Columns 41 through 45

                   0                   0                   0                   0                   0

  Columns 46 through 50

                   0                   0                   0                   0                   0

  Columns 51 through 55

                   0                   0                   0                   0                   0

  Columns 56 through 60

                   0                   0                   0                   0                   0

  Column 61

                   0


outer_code_BER =

  Columns 1 through 5

   0.119815235522946   0.116294245155329   0.112786006101737   0.109292813109344   0.105817019851914

  Columns 6 through 10

   0.102361006903492   0.098927188207309   0.095517993886343   0.092135879503793   0.088783293126820

  Columns 11 through 15

   0.085462684979897   0.082176494184811   0.078927167653618   0.075717134039974   0.072548822976575

  Columns 16 through 20

                   0                   0                   0                   0                   0

  Columns 21 through 25

                   0                   0                   0                   0                   0

  Columns 26 through 30

                   0                   0                   0                   0                   0

  Columns 31 through 35

                   0                   0                   0                   0                   0

  Columns 36 through 40

                   0                   0                   0                   0                   0

  Columns 41 through 45

                   0                   0                   0                   0                   0

  Columns 46 through 50

                   0                   0                   0                   0                   0

  Columns 51 through 55

                   0                   0                   0                   0                   0

  Columns 56 through 60

                   0                   0                   0                   0                   0

  Column 61

                   0


inner_code_BER =

  Columns 1 through 5

   0.119815235522945   0.116294245155329   0.112786006101737   0.109292813109344   0.105817019851914

  Columns 6 through 10

   0.102361006903491   0.098927188207309   0.095517993886343   0.092135879503793   0.088783293126820

  Columns 11 through 15

   0.085462684979897   0.082176494184810   0.078927167653616   0.075717134039967   0.072548822976554

  Columns 16 through 20

   0.069424690999190                   0                   0                   0                   0

  Columns 21 through 25

                   0                   0                   0                   0                   0

  Columns 26 through 30

                   0                   0                   0                   0                   0

  Columns 31 through 35

                   0                   0                   0                   0                   0

  Columns 36 through 40

                   0                   0                   0                   0                   0

  Columns 41 through 45

                   0                   0                   0                   0                   0

  Columns 46 through 50

                   0                   0                   0                   0                   0

  Columns 51 through 55

                   0                   0                   0                   0                   0

  Columns 56 through 60

                   0                   0                   0                   0                   0

  Column 61

                   0


outer_code_BER =

  Columns 1 through 5

   0.119815235522946   0.116294245155329   0.112786006101737   0.109292813109344   0.105817019851914

  Columns 6 through 10

   0.102361006903492   0.098927188207309   0.095517993886343   0.092135879503793   0.088783293126820

  Columns 11 through 15

   0.085462684979897   0.082176494184811   0.078927167653618   0.075717134039974   0.072548822976575

  Columns 16 through 20

   0.069424690999258                   0                   0                   0                   0

  Columns 21 through 25

                   0                   0                   0                   0                   0

  Columns 26 through 30

                   0                   0                   0                   0                   0

  Columns 31 through 35

                   0                   0                   0                   0                   0

  Columns 36 through 40

                   0                   0                   0                   0                   0

  Columns 41 through 45

                   0                   0                   0                   0                   0

  Columns 46 through 50

                   0                   0                   0                   0                   0

  Columns 51 through 55

                   0                   0                   0                   0                   0

  Columns 56 through 60

                   0                   0                   0                   0                   0

  Column 61

                   0


inner_code_BER =

  Columns 1 through 5

   0.119815235522945   0.116294245155329   0.112786006101737   0.109292813109344   0.105817019851914

  Columns 6 through 10

   0.102361006903491   0.098927188207309   0.095517993886343   0.092135879503793   0.088783293126820

  Columns 11 through 15

   0.085462684979897   0.082176494184810   0.078927167653616   0.075717134039967   0.072548822976554

  Columns 16 through 20

   0.069424690999190   0.066347209963311                   0                   0                   0

  Columns 21 through 25

                   0                   0                   0                   0                   0

  Columns 26 through 30

                   0                   0                   0                   0                   0

  Columns 31 through 35

                   0                   0                   0                   0                   0

  Columns 36 through 40

                   0                   0                   0                   0                   0

  Columns 41 through 45

                   0                   0                   0                   0                   0

  Columns 46 through 50

                   0                   0                   0                   0                   0

  Columns 51 through 55

                   0                   0                   0                   0                   0

  Columns 56 through 60

                   0                   0                   0                   0                   0

  Column 61

                   0


outer_code_BER =

  Columns 1 through 5

   0.119815235522946   0.116294245155329   0.112786006101737   0.109292813109344   0.105817019851914

  Columns 6 through 10

   0.102361006903492   0.098927188207309   0.095517993886343   0.092135879503793   0.088783293126820

  Columns 11 through 15

   0.085462684979897   0.082176494184811   0.078927167653618   0.075717134039974   0.072548822976575

  Columns 16 through 20

   0.069424690999258   0.066347209963525                   0                   0                   0

  Columns 21 through 25

                   0                   0                   0                   0                   0

  Columns 26 through 30

                   0                   0                   0                   0                   0

  Columns 31 through 35

                   0                   0                   0                   0                   0

  Columns 36 through 40

                   0                   0                   0                   0                   0

  Columns 41 through 45

                   0                   0                   0                   0                   0

  Columns 46 through 50

                   0                   0                   0                   0                   0

  Columns 51 through 55

                   0                   0                   0                   0                   0

  Columns 56 through 60

                   0                   0                   0                   0                   0

  Column 61

                   0


inner_code_BER =

  Columns 1 through 5

   0.119815235522945   0.116294245155329   0.112786006101737   0.109292813109344   0.105817019851914

  Columns 6 through 10

   0.102361006903491   0.098927188207309   0.095517993886343   0.092135879503793   0.088783293126820

  Columns 11 through 15

   0.085462684979897   0.082176494184810   0.078927167653616   0.075717134039967   0.072548822976554

  Columns 16 through 20

   0.069424690999190   0.066347209963311   0.063318898345584                   0                   0

  Columns 21 through 25

                   0                   0                   0                   0                   0

  Columns 26 through 30

                   0                   0                   0                   0                   0

  Columns 31 through 35

                   0                   0                   0                   0                   0

  Columns 36 through 40

                   0                   0                   0                   0                   0

  Columns 41 through 45

                   0                   0                   0                   0                   0

  Columns 46 through 50

                   0                   0                   0                   0                   0

  Columns 51 through 55

                   0                   0                   0                   0                   0

  Columns 56 through 60

                   0                   0                   0                   0                   0

  Column 61

                   0


outer_code_BER =

  Columns 1 through 5

   0.119815235522946   0.116294245155329   0.112786006101737   0.109292813109344   0.105817019851914

  Columns 6 through 10

   0.102361006903492   0.098927188207309   0.095517993886343   0.092135879503793   0.088783293126820

  Columns 11 through 15

   0.085462684979897   0.082176494184811   0.078927167653618   0.075717134039974   0.072548822976575

  Columns 16 through 20

   0.069424690999258   0.066347209963525   0.063318898346231                   0                   0

  Columns 21 through 25

                   0                   0                   0                   0                   0

  Columns 26 through 30

                   0                   0                   0                   0                   0

  Columns 31 through 35

                   0                   0                   0                   0                   0

  Columns 36 through 40

                   0                   0                   0                   0                   0

  Columns 41 through 45

                   0                   0                   0                   0                   0

  Columns 46 through 50

                   0                   0                   0                   0                   0

  Columns 51 through 55

                   0                   0                   0                   0                   0

  Columns 56 through 60

                   0                   0                   0                   0                   0

  Column 61

                   0


inner_code_BER =

  Columns 1 through 5

   0.119815235522945   0.116294245155329   0.112786006101737   0.109292813109344   0.105817019851914

  Columns 6 through 10

   0.102361006903491   0.098927188207309   0.095517993886343   0.092135879503793   0.088783293126820

  Columns 11 through 15

   0.085462684979897   0.082176494184810   0.078927167653616   0.075717134039967   0.072548822976554

  Columns 16 through 20

   0.069424690999190   0.066347209963311   0.063318898345584   0.060342359078017                   0

  Columns 21 through 25

                   0                   0                   0                   0                   0

  Columns 26 through 30

                   0                   0                   0                   0                   0

  Columns 31 through 35

                   0                   0                   0                   0                   0

  Columns 36 through 40

                   0                   0                   0                   0                   0

  Columns 41 through 45

                   0                   0                   0                   0                   0

  Columns 46 through 50

                   0                   0                   0                   0                   0

  Columns 51 through 55

                   0                   0                   0                   0                   0

  Columns 56 through 60

                   0                   0                   0                   0                   0

  Column 61

                   0


outer_code_BER =

  Columns 1 through 5

   0.119815235522946   0.116294245155329   0.112786006101737   0.109292813109344   0.105817019851914

  Columns 6 through 10

   0.102361006903492   0.098927188207309   0.095517993886343   0.092135879503793   0.088783293126820

  Columns 11 through 15

   0.085462684979897   0.082176494184811   0.078927167653618   0.075717134039974   0.072548822976575

  Columns 16 through 20

   0.069424690999258   0.066347209963525   0.063318898346231   0.060342359079913                   0

  Columns 21 through 25

                   0                   0                   0                   0                   0

  Columns 26 through 30

                   0                   0                   0                   0                   0

  Columns 31 through 35

                   0                   0                   0                   0                   0

  Columns 36 through 40

                   0                   0                   0                   0                   0

  Columns 41 through 45

                   0                   0                   0                   0                   0

  Columns 46 through 50

                   0                   0                   0                   0                   0

  Columns 51 through 55

                   0                   0                   0                   0                   0

  Columns 56 through 60

                   0                   0                   0                   0                   0

  Column 61

                   0


inner_code_BER =

  Columns 1 through 5

   0.119815235522945   0.116294245155329   0.112786006101737   0.109292813109344   0.105817019851914

  Columns 6 through 10

   0.102361006903491   0.098927188207309   0.095517993886343   0.092135879503793   0.088783293126820

  Columns 11 through 15

   0.085462684979897   0.082176494184810   0.078927167653616   0.075717134039967   0.072548822976554

  Columns 16 through 20

   0.069424690999190   0.066347209963311   0.063318898345584   0.060342359078017   0.057420275166550

  Columns 21 through 25

                   0                   0                   0                   0                   0

  Columns 26 through 30

                   0                   0                   0                   0                   0

  Columns 31 through 35

                   0                   0                   0                   0                   0

  Columns 36 through 40

                   0                   0                   0                   0                   0

  Columns 41 through 45

                   0                   0                   0                   0                   0

  Columns 46 through 50

                   0                   0                   0                   0                   0

  Columns 51 through 55

                   0                   0                   0                   0                   0

  Columns 56 through 60

                   0                   0                   0                   0                   0

  Column 61

                   0


outer_code_BER =

  Columns 1 through 5

   0.119815235522946   0.116294245155329   0.112786006101737   0.109292813109344   0.105817019851914

  Columns 6 through 10

   0.102361006903492   0.098927188207309   0.095517993886343   0.092135879503793   0.088783293126820

  Columns 11 through 15

   0.085462684979897   0.082176494184811   0.078927167653618   0.075717134039974   0.072548822976575

  Columns 16 through 20

   0.069424690999258   0.066347209963525   0.063318898346231   0.060342359079913   0.057420275171911

  Columns 21 through 25

                   0                   0                   0                   0                   0

  Columns 26 through 30

                   0                   0                   0                   0                   0

  Columns 31 through 35

                   0                   0                   0                   0                   0

  Columns 36 through 40

                   0                   0                   0                   0                   0

  Columns 41 through 45

                   0                   0                   0                   0                   0

  Columns 46 through 50

                   0                   0                   0                   0                   0

  Columns 51 through 55

                   0                   0                   0                   0                   0

  Columns 56 through 60

                   0                   0                   0                   0                   0

  Column 61

                   0


inner_code_BER =

  Columns 1 through 5

   0.119815235522945   0.116294245155329   0.112786006101737   0.109292813109344   0.105817019851914

  Columns 6 through 10

   0.102361006903491   0.098927188207309   0.095517993886343   0.092135879503793   0.088783293126820

  Columns 11 through 15

   0.085462684979897   0.082176494184810   0.078927167653616   0.075717134039967   0.072548822976554

  Columns 16 through 20

   0.069424690999190   0.066347209963311   0.063318898345584   0.060342359078017   0.057420275166550

  Columns 21 through 25

   0.054555441862311                   0                   0                   0                   0

  Columns 26 through 30

                   0                   0                   0                   0                   0

  Columns 31 through 35

                   0                   0                   0                   0                   0

  Columns 36 through 40

                   0                   0                   0                   0                   0

  Columns 41 through 45

                   0                   0                   0                   0                   0

  Columns 46 through 50

                   0                   0                   0                   0                   0

  Columns 51 through 55

                   0                   0                   0                   0                   0

  Columns 56 through 60

                   0                   0                   0                   0                   0

  Column 61

                   0


outer_code_BER =

  Columns 1 through 5

   0.119815235522946   0.116294245155329   0.112786006101737   0.109292813109344   0.105817019851914

  Columns 6 through 10

   0.102361006903492   0.098927188207309   0.095517993886343   0.092135879503793   0.088783293126820

  Columns 11 through 15

   0.085462684979897   0.082176494184811   0.078927167653618   0.075717134039974   0.072548822976575

  Columns 16 through 20

   0.069424690999258   0.066347209963525   0.063318898346231   0.060342359079913   0.057420275171911

  Columns 21 through 25

   0.054555441876930                   0                   0                   0                   0

  Columns 26 through 30

                   0                   0                   0                   0                   0

  Columns 31 through 35

                   0                   0                   0                   0                   0

  Columns 36 through 40

                   0                   0                   0                   0                   0

  Columns 41 through 45

                   0                   0                   0                   0                   0

  Columns 46 through 50

                   0                   0                   0                   0                   0

  Columns 51 through 55

                   0                   0                   0                   0                   0

  Columns 56 through 60

                   0                   0                   0                   0                   0

  Column 61

                   0


inner_code_BER =

  Columns 1 through 5

   0.119815235522945   0.116294245155329   0.112786006101737   0.109292813109344   0.105817019851914

  Columns 6 through 10

   0.102361006903491   0.098927188207309   0.095517993886343   0.092135879503793   0.088783293126820

  Columns 11 through 15

   0.085462684979897   0.082176494184810   0.078927167653616   0.075717134039967   0.072548822976554

  Columns 16 through 20

   0.069424690999190   0.066347209963311   0.063318898345584   0.060342359078017   0.057420275166550

  Columns 21 through 25

   0.054555441862311   0.051750796888816                   0                   0                   0

  Columns 26 through 30

                   0                   0                   0                   0                   0

  Columns 31 through 35

                   0                   0                   0                   0                   0

  Columns 36 through 40

                   0                   0                   0                   0                   0

  Columns 41 through 45

                   0                   0                   0                   0                   0

  Columns 46 through 50

                   0                   0                   0                   0                   0

  Columns 51 through 55

                   0                   0                   0                   0                   0

  Columns 56 through 60

                   0                   0                   0                   0                   0

  Column 61

                   0


outer_code_BER =

  Columns 1 through 5

   0.119815235522946   0.116294245155329   0.112786006101737   0.109292813109344   0.105817019851914

  Columns 6 through 10

   0.102361006903492   0.098927188207309   0.095517993886343   0.092135879503793   0.088783293126820

  Columns 11 through 15

   0.085462684979897   0.082176494184811   0.078927167653618   0.075717134039974   0.072548822976575

  Columns 16 through 20

   0.069424690999258   0.066347209963525   0.063318898346231   0.060342359079913   0.057420275171911

  Columns 21 through 25

   0.054555441876930   0.051750796927267                   0                   0                   0

  Columns 26 through 30

                   0                   0                   0                   0                   0

  Columns 31 through 35

                   0                   0                   0                   0                   0

  Columns 36 through 40

                   0                   0                   0                   0                   0

  Columns 41 through 45

                   0                   0                   0                   0                   0

  Columns 46 through 50

                   0                   0                   0                   0                   0

  Columns 51 through 55

                   0                   0                   0                   0                   0

  Columns 56 through 60

                   0                   0                   0                   0                   0

  Column 61

                   0


inner_code_BER =

  Columns 1 through 5

   0.119815235522945   0.116294245155329   0.112786006101737   0.109292813109344   0.105817019851914

  Columns 6 through 10

   0.102361006903491   0.098927188207309   0.095517993886343   0.092135879503793   0.088783293126820

  Columns 11 through 15

   0.085462684979897   0.082176494184810   0.078927167653616   0.075717134039967   0.072548822976554

  Columns 16 through 20

   0.069424690999190   0.066347209963311   0.063318898345584   0.060342359078017   0.057420275166550

  Columns 21 through 25

   0.054555441862311   0.051750796888816   0.049009391519987                   0                   0

  Columns 26 through 30

                   0                   0                   0                   0                   0

  Columns 31 through 35

                   0                   0                   0                   0                   0

  Columns 36 through 40

                   0                   0                   0                   0                   0

  Columns 41 through 45

                   0                   0                   0                   0                   0

  Columns 46 through 50

                   0                   0                   0                   0                   0

  Columns 51 through 55

                   0                   0                   0                   0                   0

  Columns 56 through 60

                   0                   0                   0                   0                   0

  Column 61

                   0


outer_code_BER =

  Columns 1 through 5

   0.119815235522946   0.116294245155329   0.112786006101737   0.109292813109344   0.105817019851914

  Columns 6 through 10

   0.102361006903492   0.098927188207309   0.095517993886343   0.092135879503793   0.088783293126820

  Columns 11 through 15

   0.085462684979897   0.082176494184811   0.078927167653618   0.075717134039974   0.072548822976575

  Columns 16 through 20

   0.069424690999258   0.066347209963525   0.063318898346231   0.060342359079913   0.057420275171911

  Columns 21 through 25

   0.054555441876930   0.051750796927267   0.049009391617475                   0                   0

  Columns 26 through 30

                   0                   0                   0                   0                   0

  Columns 31 through 35

                   0                   0                   0                   0                   0

  Columns 36 through 40

                   0                   0                   0                   0                   0

  Columns 41 through 45

                   0                   0                   0                   0                   0

  Columns 46 through 50

                   0                   0                   0                   0                   0

  Columns 51 through 55

                   0                   0                   0                   0                   0

  Columns 56 through 60

                   0                   0                   0                   0                   0

  Column 61

                   0


inner_code_BER =

  Columns 1 through 5

   0.119815235522945   0.116294245155329   0.112786006101737   0.109292813109344   0.105817019851914

  Columns 6 through 10

   0.102361006903491   0.098927188207309   0.095517993886343   0.092135879503793   0.088783293126820

  Columns 11 through 15

   0.085462684979897   0.082176494184810   0.078927167653616   0.075717134039967   0.072548822976554

  Columns 16 through 20

   0.069424690999190   0.066347209963311   0.063318898345584   0.060342359078017   0.057420275166550

  Columns 21 through 25

   0.054555441862311   0.051750796888816   0.049009391519987   0.046334383594432                   0

  Columns 26 through 30

                   0                   0                   0                   0                   0

  Columns 31 through 35

                   0                   0                   0                   0                   0

  Columns 36 through 40

                   0                   0                   0                   0                   0

  Columns 41 through 45

                   0                   0                   0                   0                   0

  Columns 46 through 50

                   0                   0                   0                   0                   0

  Columns 51 through 55

                   0                   0                   0                   0                   0

  Columns 56 through 60

                   0                   0                   0                   0                   0

  Column 61

                   0


outer_code_BER =

  Columns 1 through 5

   0.119815235522946   0.116294245155329   0.112786006101737   0.109292813109344   0.105817019851914

  Columns 6 through 10

   0.102361006903492   0.098927188207309   0.095517993886343   0.092135879503793   0.088783293126820

  Columns 11 through 15

   0.085462684979897   0.082176494184811   0.078927167653618   0.075717134039974   0.072548822976575

  Columns 16 through 20

   0.069424690999258   0.066347209963525   0.063318898346231   0.060342359079913   0.057420275171911

  Columns 21 through 25

   0.054555441876930   0.051750796927267   0.049009391617475   0.046334383832559                   0

  Columns 26 through 30

                   0                   0                   0                   0                   0

  Columns 31 through 35

                   0                   0                   0                   0                   0

  Columns 36 through 40

                   0                   0                   0                   0                   0

  Columns 41 through 45

                   0                   0                   0                   0                   0

  Columns 46 through 50

                   0                   0                   0                   0                   0

  Columns 51 through 55

                   0                   0                   0                   0                   0

  Columns 56 through 60

                   0                   0                   0                   0                   0

  Column 61

                   0


inner_code_BER =

  Columns 1 through 5

   0.119815235522945   0.116294245155329   0.112786006101737   0.109292813109344   0.105817019851914

  Columns 6 through 10

   0.102361006903491   0.098927188207309   0.095517993886343   0.092135879503793   0.088783293126820

  Columns 11 through 15

   0.085462684979897   0.082176494184810   0.078927167653616   0.075717134039967   0.072548822976554

  Columns 16 through 20

   0.069424690999190   0.066347209963311   0.063318898345584   0.060342359078017   0.057420275166550

  Columns 21 through 25

   0.054555441862311   0.051750796888816   0.049009391519987   0.046334383594432   0.043729010042157

  Columns 26 through 30

                   0                   0                   0                   0                   0

  Columns 31 through 35

                   0                   0                   0                   0                   0

  Columns 36 through 40

                   0                   0                   0                   0                   0

  Columns 41 through 45

                   0                   0                   0                   0                   0

  Columns 46 through 50

                   0                   0                   0                   0                   0

  Columns 51 through 55

                   0                   0                   0                   0                   0

  Columns 56 through 60

                   0                   0                   0                   0                   0

  Column 61

                   0


outer_code_BER =

  Columns 1 through 5

   0.119815235522946   0.116294245155329   0.112786006101737   0.109292813109344   0.105817019851914

  Columns 6 through 10

   0.102361006903492   0.098927188207309   0.095517993886343   0.092135879503793   0.088783293126820

  Columns 11 through 15

   0.085462684979897   0.082176494184811   0.078927167653618   0.075717134039974   0.072548822976575

  Columns 16 through 20

   0.069424690999258   0.066347209963525   0.063318898346231   0.060342359079913   0.057420275171911

  Columns 21 through 25

   0.054555441876930   0.051750796927267   0.049009391617475   0.046334383832559   0.043729010602171

  Columns 26 through 30

                   0                   0                   0                   0                   0

  Columns 31 through 35

                   0                   0                   0                   0                   0

  Columns 36 through 40

                   0                   0                   0                   0                   0

  Columns 41 through 45

                   0                   0                   0                   0                   0

  Columns 46 through 50

                   0                   0                   0                   0                   0

  Columns 51 through 55

                   0                   0                   0                   0                   0

  Columns 56 through 60

                   0                   0                   0                   0                   0

  Column 61

                   0


inner_code_BER =

  Columns 1 through 5

   0.119815235522945   0.116294245155329   0.112786006101737   0.109292813109344   0.105817019851914

  Columns 6 through 10

   0.102361006903491   0.098927188207309   0.095517993886343   0.092135879503793   0.088783293126820

  Columns 11 through 15

   0.085462684979897   0.082176494184810   0.078927167653616   0.075717134039967   0.072548822976554

  Columns 16 through 20

   0.069424690999190   0.066347209963311   0.063318898345584   0.060342359078017   0.057420275166550

  Columns 21 through 25

   0.054555441862311   0.051750796888816   0.049009391519987   0.046334383594432   0.043729010042157

  Columns 26 through 30

   0.041196476320133                   0                   0                   0                   0

  Columns 31 through 35

                   0                   0                   0                   0                   0

  Columns 36 through 40

                   0                   0                   0                   0                   0

  Columns 41 through 45

                   0                   0                   0                   0                   0

  Columns 46 through 50

                   0                   0                   0                   0                   0

  Columns 51 through 55

                   0                   0                   0                   0                   0

  Columns 56 through 60

                   0                   0                   0                   0                   0

  Column 61

                   0


outer_code_BER =

  Columns 1 through 5

   0.119815235522946   0.116294245155329   0.112786006101737   0.109292813109344   0.105817019851914

  Columns 6 through 10

   0.102361006903492   0.098927188207309   0.095517993886343   0.092135879503793   0.088783293126820

  Columns 11 through 15

   0.085462684979897   0.082176494184811   0.078927167653618   0.075717134039974   0.072548822976575

  Columns 16 through 20

   0.069424690999258   0.066347209963525   0.063318898346231   0.060342359079913   0.057420275171911

  Columns 21 through 25

   0.054555441876930   0.051750796927267   0.049009391617475   0.046334383832559   0.043729010602171

  Columns 26 through 30

   0.041196477587153                   0                   0                   0                   0

  Columns 31 through 35

                   0                   0                   0                   0                   0

  Columns 36 through 40

                   0                   0                   0                   0                   0

  Columns 41 through 45

                   0                   0                   0                   0                   0

  Columns 46 through 50

                   0                   0                   0                   0                   0

  Columns 51 through 55

                   0                   0                   0                   0                   0

  Columns 56 through 60

                   0                   0                   0                   0                   0

  Column 61

                   0


inner_code_BER =

  Columns 1 through 5

   0.119815235522945   0.116294245155329   0.112786006101737   0.109292813109344   0.105817019851914

  Columns 6 through 10

   0.102361006903491   0.098927188207309   0.095517993886343   0.092135879503793   0.088783293126820

  Columns 11 through 15

   0.085462684979897   0.082176494184810   0.078927167653616   0.075717134039967   0.072548822976554

  Columns 16 through 20

   0.069424690999190   0.066347209963311   0.063318898345584   0.060342359078017   0.057420275166550

  Columns 21 through 25

   0.054555441862311   0.051750796888816   0.049009391519987   0.046334383594432   0.043729010042157

  Columns 26 through 30

   0.041196476320133   0.038739857047773                   0                   0                   0

  Columns 31 through 35

                   0                   0                   0                   0                   0

  Columns 36 through 40

                   0                   0                   0                   0                   0

  Columns 41 through 45

                   0                   0                   0                   0                   0

  Columns 46 through 50

                   0                   0                   0                   0                   0

  Columns 51 through 55

                   0                   0                   0                   0                   0

  Columns 56 through 60

                   0                   0                   0                   0                   0

  Column 61

                   0


outer_code_BER =

  Columns 1 through 5

   0.119815235522946   0.116294245155329   0.112786006101737   0.109292813109344   0.105817019851914

  Columns 6 through 10

   0.102361006903492   0.098927188207309   0.095517993886343   0.092135879503793   0.088783293126820

  Columns 11 through 15

   0.085462684979897   0.082176494184811   0.078927167653618   0.075717134039974   0.072548822976575

  Columns 16 through 20

   0.069424690999258   0.066347209963525   0.063318898346231   0.060342359079913   0.057420275171911

  Columns 21 through 25

   0.054555441876930   0.051750796927267   0.049009391617475   0.046334383832559   0.043729010602171

  Columns 26 through 30

   0.041196477587153   0.038739859803037                   0                   0                   0

  Columns 31 through 35

                   0                   0                   0                   0                   0

  Columns 36 through 40

                   0                   0                   0                   0                   0

  Columns 41 through 45

                   0                   0                   0                   0                   0

  Columns 46 through 50

                   0                   0                   0                   0                   0

  Columns 51 through 55

                   0                   0                   0                   0                   0

  Columns 56 through 60

                   0                   0                   0                   0                   0

  Column 61

                   0


inner_code_BER =

  Columns 1 through 5

   0.119815235522945   0.116294245155329   0.112786006101737   0.109292813109344   0.105817019851914

  Columns 6 through 10

   0.102361006903491   0.098927188207309   0.095517993886343   0.092135879503793   0.088783293126820

  Columns 11 through 15

   0.085462684979897   0.082176494184810   0.078927167653616   0.075717134039967   0.072548822976554

  Columns 16 through 20

   0.069424690999190   0.066347209963311   0.063318898345584   0.060342359078017   0.057420275166550

  Columns 21 through 25

   0.054555441862311   0.051750796888816   0.049009391519987   0.046334383594432   0.043729010042157

  Columns 26 through 30

   0.041196476320133   0.038739857047773   0.036361970552329                   0                   0

  Columns 31 through 35

                   0                   0                   0                   0                   0

  Columns 36 through 40

                   0                   0                   0                   0                   0

  Columns 41 through 45

                   0                   0                   0                   0                   0

  Columns 46 through 50

                   0                   0                   0                   0                   0

  Columns 51 through 55

                   0                   0                   0                   0                   0

  Columns 56 through 60

                   0                   0                   0                   0                   0

  Column 61

                   0


outer_code_BER =

  Columns 1 through 5

   0.119815235522946   0.116294245155329   0.112786006101737   0.109292813109344   0.105817019851914

  Columns 6 through 10

   0.102361006903492   0.098927188207309   0.095517993886343   0.092135879503793   0.088783293126820

  Columns 11 through 15

   0.085462684979897   0.082176494184811   0.078927167653618   0.075717134039974   0.072548822976575

  Columns 16 through 20

   0.069424690999258   0.066347209963525   0.063318898346231   0.060342359079913   0.057420275171911

  Columns 21 through 25

   0.054555441876930   0.051750796927267   0.049009391617475   0.046334383832559   0.043729010602171

  Columns 26 through 30

   0.041196477587153   0.038739859803037   0.036361976304863                   0                   0

  Columns 31 through 35

                   0                   0                   0                   0                   0

  Columns 36 through 40

                   0                   0                   0                   0                   0

  Columns 41 through 45

                   0                   0                   0                   0                   0

  Columns 46 through 50

                   0                   0                   0                   0                   0

  Columns 51 through 55

                   0                   0                   0                   0                   0

  Columns 56 through 60

                   0                   0                   0                   0                   0

  Column 61

                   0


inner_code_BER =

  Columns 1 through 5

   0.119815235522945   0.116294245155329   0.112786006101737   0.109292813109344   0.105817019851914

  Columns 6 through 10

   0.102361006903491   0.098927188207309   0.095517993886343   0.092135879503793   0.088783293126820

  Columns 11 through 15

   0.085462684979897   0.082176494184810   0.078927167653616   0.075717134039967   0.072548822976554

  Columns 16 through 20

   0.069424690999190   0.066347209963311   0.063318898345584   0.060342359078017   0.057420275166550

  Columns 21 through 25

   0.054555441862311   0.051750796888816   0.049009391519987   0.046334383594432   0.043729010042157

  Columns 26 through 30

   0.041196476320133   0.038739857047773   0.036361970552329   0.034065176178667                   0

  Columns 31 through 35

                   0                   0                   0                   0                   0

  Columns 36 through 40

                   0                   0                   0                   0                   0

  Columns 41 through 45

                   0                   0                   0                   0                   0

  Columns 46 through 50

                   0                   0                   0                   0                   0

  Columns 51 through 55

                   0                   0                   0                   0                   0

  Columns 56 through 60

                   0                   0                   0                   0                   0

  Column 61

                   0


outer_code_BER =

  Columns 1 through 5

   0.119815235522946   0.116294245155329   0.112786006101737   0.109292813109344   0.105817019851914

  Columns 6 through 10

   0.102361006903492   0.098927188207309   0.095517993886343   0.092135879503793   0.088783293126820

  Columns 11 through 15

   0.085462684979897   0.082176494184811   0.078927167653618   0.075717134039974   0.072548822976575

  Columns 16 through 20

   0.069424690999258   0.066347209963525   0.063318898346231   0.060342359079913   0.057420275171911

  Columns 21 through 25

   0.054555441876930   0.051750796927267   0.049009391617475   0.046334383832559   0.043729010602171

  Columns 26 through 30

   0.041196477587153   0.038739859803037   0.036361976304863   0.034065187694260                   0

  Columns 31 through 35

                   0                   0                   0                   0                   0

  Columns 36 through 40

                   0                   0                   0                   0                   0

  Columns 41 through 45

                   0                   0                   0                   0                   0

  Columns 46 through 50

                   0                   0                   0                   0                   0

  Columns 51 through 55

                   0                   0                   0                   0                   0

  Columns 56 through 60

                   0                   0                   0                   0                   0

  Column 61

                   0


inner_code_BER =

  Columns 1 through 5

   0.119815235522945   0.116294245155329   0.112786006101737   0.109292813109344   0.105817019851914

  Columns 6 through 10

   0.102361006903491   0.098927188207309   0.095517993886343   0.092135879503793   0.088783293126820

  Columns 11 through 15

   0.085462684979897   0.082176494184810   0.078927167653616   0.075717134039967   0.072548822976554

  Columns 16 through 20

   0.069424690999190   0.066347209963311   0.063318898345584   0.060342359078017   0.057420275166550

  Columns 21 through 25

   0.054555441862311   0.051750796888816   0.049009391519987   0.046334383594432   0.043729010042157

  Columns 26 through 30

   0.041196476320133   0.038739857047773   0.036361970552329   0.034065176178667   0.031851215499299

  Columns 31 through 35

                   0                   0                   0                   0                   0

  Columns 36 through 40

                   0                   0                   0                   0                   0

  Columns 41 through 45

                   0                   0                   0                   0                   0

  Columns 46 through 50

                   0                   0                   0                   0                   0

  Columns 51 through 55

                   0                   0                   0                   0                   0

  Columns 56 through 60

                   0                   0                   0                   0                   0

  Column 61

                   0


outer_code_BER =

  Columns 1 through 5

   0.119815235522946   0.116294245155329   0.112786006101737   0.109292813109344   0.105817019851914

  Columns 6 through 10

   0.102361006903492   0.098927188207309   0.095517993886343   0.092135879503793   0.088783293126820

  Columns 11 through 15

   0.085462684979897   0.082176494184811   0.078927167653618   0.075717134039974   0.072548822976575

  Columns 16 through 20

   0.069424690999258   0.066347209963525   0.063318898346231   0.060342359079913   0.057420275171911

  Columns 21 through 25

   0.054555441876930   0.051750796927267   0.049009391617475   0.046334383832559   0.043729010602171

  Columns 26 through 30

   0.041196477587153   0.038739859803037   0.036361976304863   0.034065187694260   0.031851237563249

  Columns 31 through 35

                   0                   0                   0                   0                   0

  Columns 36 through 40

                   0                   0                   0                   0                   0

  Columns 41 through 45

                   0                   0                   0                   0                   0

  Columns 46 through 50

                   0                   0                   0                   0                   0

  Columns 51 through 55

                   0                   0                   0                   0                   0

  Columns 56 through 60

                   0                   0                   0                   0                   0

  Column 61

                   0


inner_code_BER =

  Columns 1 through 5

   0.119815235522945   0.116294245155329   0.112786006101737   0.109292813109344   0.105817019851914

  Columns 6 through 10

   0.102361006903491   0.098927188207309   0.095517993886343   0.092135879503793   0.088783293126820

  Columns 11 through 15

   0.085462684979897   0.082176494184810   0.078927167653616   0.075717134039967   0.072548822976554

  Columns 16 through 20

   0.069424690999190   0.066347209963311   0.063318898345584   0.060342359078017   0.057420275166550

  Columns 21 through 25

   0.054555441862311   0.051750796888816   0.049009391519987   0.046334383594432   0.043729010042157

  Columns 26 through 30

   0.041196476320133   0.038739857047773   0.036361970552329   0.034065176178667   0.031851215499299

  Columns 31 through 35

   0.029721073483230                   0                   0                   0                   0

  Columns 36 through 40

                   0                   0                   0                   0                   0

  Columns 41 through 45

                   0                   0                   0                   0                   0

  Columns 46 through 50

                   0                   0                   0                   0                   0

  Columns 51 through 55

                   0                   0                   0                   0                   0

  Columns 56 through 60

                   0                   0                   0                   0                   0

  Column 61

                   0


outer_code_BER =

  Columns 1 through 5

   0.119815235522946   0.116294245155329   0.112786006101737   0.109292813109344   0.105817019851914

  Columns 6 through 10

   0.102361006903492   0.098927188207309   0.095517993886343   0.092135879503793   0.088783293126820

  Columns 11 through 15

   0.085462684979897   0.082176494184811   0.078927167653618   0.075717134039974   0.072548822976575

  Columns 16 through 20

   0.069424690999258   0.066347209963525   0.063318898346231   0.060342359079913   0.057420275171911

  Columns 21 through 25

   0.054555441876930   0.051750796927267   0.049009391617475   0.046334383832559   0.043729010602171

  Columns 26 through 30

   0.041196477587153   0.038739859803037   0.036361976304863   0.034065187694260   0.031851237563249

  Columns 31 through 35

   0.029721113844877                   0                   0                   0                   0

  Columns 36 through 40

                   0                   0                   0                   0                   0

  Columns 41 through 45

                   0                   0                   0                   0                   0

  Columns 46 through 50

                   0                   0                   0                   0                   0

  Columns 51 through 55

                   0                   0                   0                   0                   0

  Columns 56 through 60

                   0                   0                   0                   0                   0

  Column 61

                   0


inner_code_BER =

  Columns 1 through 5

   0.119815235522945   0.116294245155329   0.112786006101737   0.109292813109344   0.105817019851914

  Columns 6 through 10

   0.102361006903491   0.098927188207309   0.095517993886343   0.092135879503793   0.088783293126820

  Columns 11 through 15

   0.085462684979897   0.082176494184810   0.078927167653616   0.075717134039967   0.072548822976554

  Columns 16 through 20

   0.069424690999190   0.066347209963311   0.063318898345584   0.060342359078017   0.057420275166550

  Columns 21 through 25

   0.054555441862311   0.051750796888816   0.049009391519987   0.046334383594432   0.043729010042157

  Columns 26 through 30

   0.041196476320133   0.038739857047773   0.036361970552329   0.034065176178667   0.031851215499299

  Columns 31 through 35

   0.029721073483230   0.027674821564944                   0                   0                   0

  Columns 36 through 40

                   0                   0                   0                   0                   0

  Columns 41 through 45

                   0                   0                   0                   0                   0

  Columns 46 through 50

                   0                   0                   0                   0                   0

  Columns 51 through 55

                   0                   0                   0                   0                   0

  Columns 56 through 60

                   0                   0                   0                   0                   0

  Column 61

                   0


outer_code_BER =

  Columns 1 through 5

   0.119815235522946   0.116294245155329   0.112786006101737   0.109292813109344   0.105817019851914

  Columns 6 through 10

   0.102361006903492   0.098927188207309   0.095517993886343   0.092135879503793   0.088783293126820

  Columns 11 through 15

   0.085462684979897   0.082176494184811   0.078927167653618   0.075717134039974   0.072548822976575

  Columns 16 through 20

   0.069424690999258   0.066347209963525   0.063318898346231   0.060342359079913   0.057420275171911

  Columns 21 through 25

   0.054555441876930   0.051750796927267   0.049009391617475   0.046334383832559   0.043729010602171

  Columns 26 through 30

   0.041196477587153   0.038739859803037   0.036361976304863   0.034065187694260   0.031851237563249

  Columns 31 through 35

   0.029721113844877   0.027674891784086                   0                   0                   0

  Columns 36 through 40

                   0                   0                   0                   0                   0

  Columns 41 through 45

                   0                   0                   0                   0                   0

  Columns 46 through 50

                   0                   0                   0                   0                   0

  Columns 51 through 55

                   0                   0                   0                   0                   0

  Columns 56 through 60

                   0                   0                   0                   0                   0

  Column 61

                   0


inner_code_BER =

  Columns 1 through 5

   0.119815235522945   0.116294245155329   0.112786006101737   0.109292813109344   0.105817019851914

  Columns 6 through 10

   0.102361006903491   0.098927188207309   0.095517993886343   0.092135879503793   0.088783293126820

  Columns 11 through 15

   0.085462684979897   0.082176494184810   0.078927167653616   0.075717134039967   0.072548822976554

  Columns 16 through 20

   0.069424690999190   0.066347209963311   0.063318898345584   0.060342359078017   0.057420275166550

  Columns 21 through 25

   0.054555441862311   0.051750796888816   0.049009391519987   0.046334383594432   0.043729010042157

  Columns 26 through 30

   0.041196476320133   0.038739857047773   0.036361970552329   0.034065176178667   0.031851215499299

  Columns 31 through 35

   0.029721073483230   0.027674821564944   0.025711570474434                   0                   0

  Columns 36 through 40

                   0                   0                   0                   0                   0

  Columns 41 through 45

                   0                   0                   0                   0                   0

  Columns 46 through 50

                   0                   0                   0                   0                   0

  Columns 51 through 55

                   0                   0                   0                   0                   0

  Columns 56 through 60

                   0                   0                   0                   0                   0

  Column 61

                   0


outer_code_BER =

  Columns 1 through 5

   0.119815235522946   0.116294245155329   0.112786006101737   0.109292813109344   0.105817019851914

  Columns 6 through 10

   0.102361006903492   0.098927188207309   0.095517993886343   0.092135879503793   0.088783293126820

  Columns 11 through 15

   0.085462684979897   0.082176494184811   0.078927167653618   0.075717134039974   0.072548822976575

  Columns 16 through 20

   0.069424690999258   0.066347209963525   0.063318898346231   0.060342359079913   0.057420275171911

  Columns 21 through 25

   0.054555441876930   0.051750796927267   0.049009391617475   0.046334383832559   0.043729010602171

  Columns 26 through 30

   0.041196477587153   0.038739859803037   0.036361976304863   0.034065187694260   0.031851237563249

  Columns 31 through 35

   0.029721113844877   0.027674891784086   0.025711685883192                   0                   0

  Columns 36 through 40

                   0                   0                   0                   0                   0

  Columns 41 through 45

                   0                   0                   0                   0                   0

  Columns 46 through 50

                   0                   0                   0                   0                   0

  Columns 51 through 55

                   0                   0                   0                   0                   0

  Columns 56 through 60

                   0                   0                   0                   0                   0

  Column 61

                   0


inner_code_BER =

  Columns 1 through 5

   0.119815235522945   0.116294245155329   0.112786006101737   0.109292813109344   0.105817019851914

  Columns 6 through 10

   0.102361006903491   0.098927188207309   0.095517993886343   0.092135879503793   0.088783293126820

  Columns 11 through 15

   0.085462684979897   0.082176494184810   0.078927167653616   0.075717134039967   0.072548822976554

  Columns 16 through 20

   0.069424690999190   0.066347209963311   0.063318898345584   0.060342359078017   0.057420275166550

  Columns 21 through 25

   0.054555441862311   0.051750796888816   0.049009391519987   0.046334383594432   0.043729010042157

  Columns 26 through 30

   0.041196476320133   0.038739857047773   0.036361970552329   0.034065176178667   0.031851215499299

  Columns 31 through 35

   0.029721073483230   0.027674821564944   0.025711570474434   0.023829499056470                   0

  Columns 36 through 40

                   0                   0                   0                   0                   0

  Columns 41 through 45

                   0                   0                   0                   0                   0

  Columns 46 through 50

                   0                   0                   0                   0                   0

  Columns 51 through 55

                   0                   0                   0                   0                   0

  Columns 56 through 60

                   0                   0                   0                   0                   0

  Column 61

                   0


outer_code_BER =

  Columns 1 through 5

   0.119815235522946   0.116294245155329   0.112786006101737   0.109292813109344   0.105817019851914

  Columns 6 through 10

   0.102361006903492   0.098927188207309   0.095517993886343   0.092135879503793   0.088783293126820

  Columns 11 through 15

   0.085462684979897   0.082176494184811   0.078927167653618   0.075717134039974   0.072548822976575

  Columns 16 through 20

   0.069424690999258   0.066347209963525   0.063318898346231   0.060342359079913   0.057420275171911

  Columns 21 through 25

   0.054555441876930   0.051750796927267   0.049009391617475   0.046334383832559   0.043729010602171

  Columns 26 through 30

   0.041196477587153   0.038739859803037   0.036361976304863   0.034065187694260   0.031851237563249

  Columns 31 through 35

   0.029721113844877   0.027674891784086   0.025711685883192   0.023829676000663                   0

  Columns 36 through 40

                   0                   0                   0                   0                   0

  Columns 41 through 45

                   0                   0                   0                   0                   0

  Columns 46 through 50

                   0                   0                   0                   0                   0

  Columns 51 through 55

                   0                   0                   0                   0                   0

  Columns 56 through 60

                   0                   0                   0                   0                   0

  Column 61

                   0


inner_code_BER =

  Columns 1 through 5

   0.119815235522945   0.116294245155329   0.112786006101737   0.109292813109344   0.105817019851914

  Columns 6 through 10

   0.102361006903491   0.098927188207309   0.095517993886343   0.092135879503793   0.088783293126820

  Columns 11 through 15

   0.085462684979897   0.082176494184810   0.078927167653616   0.075717134039967   0.072548822976554

  Columns 16 through 20

   0.069424690999190   0.066347209963311   0.063318898345584   0.060342359078017   0.057420275166550

  Columns 21 through 25

   0.054555441862311   0.051750796888816   0.049009391519987   0.046334383594432   0.043729010042157

  Columns 26 through 30

   0.041196476320133   0.038739857047773   0.036361970552329   0.034065176178667   0.031851215499299

  Columns 31 through 35

   0.029721073483230   0.027674821564944   0.025711570474434   0.023829499056470   0.022025892313567

  Columns 36 through 40

                   0                   0                   0                   0                   0

  Columns 41 through 45

                   0                   0                   0                   0                   0

  Columns 46 through 50

                   0                   0                   0                   0                   0

  Columns 51 through 55

                   0                   0                   0                   0                   0

  Columns 56 through 60

                   0                   0                   0                   0                   0

  Column 61

                   0


outer_code_BER =

  Columns 1 through 5

   0.119815235522946   0.116294245155329   0.112786006101737   0.109292813109344   0.105817019851914

  Columns 6 through 10

   0.102361006903492   0.098927188207309   0.095517993886343   0.092135879503793   0.088783293126820

  Columns 11 through 15

   0.085462684979897   0.082176494184811   0.078927167653618   0.075717134039974   0.072548822976575

  Columns 16 through 20

   0.069424690999258   0.066347209963525   0.063318898346231   0.060342359079913   0.057420275171911

  Columns 21 through 25

   0.054555441876930   0.051750796927267   0.049009391617475   0.046334383832559   0.043729010602171

  Columns 26 through 30

   0.041196477587153   0.038739859803037   0.036361976304863   0.034065187694260   0.031851237563249

  Columns 31 through 35

   0.029721113844877   0.027674891784086   0.025711685883192   0.023829676000663   0.022026138744422

  Columns 36 through 40

                   0                   0                   0                   0                   0

  Columns 41 through 45

                   0                   0                   0                   0                   0

  Columns 46 through 50

                   0                   0                   0                   0                   0

  Columns 51 through 55

                   0                   0                   0                   0                   0

  Columns 56 through 60

                   0                   0                   0                   0                   0

  Column 61

                   0


inner_code_BER =

  Columns 1 through 5

   0.119815235522945   0.116294245155329   0.112786006101737   0.109292813109344   0.105817019851914

  Columns 6 through 10

   0.102361006903491   0.098927188207309   0.095517993886343   0.092135879503793   0.088783293126820

  Columns 11 through 15

   0.085462684979897   0.082176494184810   0.078927167653616   0.075717134039967   0.072548822976554

  Columns 16 through 20

   0.069424690999190   0.066347209963311   0.063318898345584   0.060342359078017   0.057420275166550

  Columns 21 through 25

   0.054555441862311   0.051750796888816   0.049009391519987   0.046334383594432   0.043729010042157

  Columns 26 through 30

   0.041196476320133   0.038739857047773   0.036361970552329   0.034065176178667   0.031851215499299

  Columns 31 through 35

   0.029721073483230   0.027674821564944   0.025711570474434   0.023829499056470   0.022025892313567

  Columns 36 through 40

   0.020297347367770                   0                   0                   0                   0

  Columns 41 through 45

                   0                   0                   0                   0                   0

  Columns 46 through 50

                   0                   0                   0                   0                   0

  Columns 51 through 55

                   0                   0                   0                   0                   0

  Columns 56 through 60

                   0                   0                   0                   0                   0

  Column 61

                   0


outer_code_BER =

  Columns 1 through 5

   0.119815235522946   0.116294245155329   0.112786006101737   0.109292813109344   0.105817019851914

  Columns 6 through 10

   0.102361006903492   0.098927188207309   0.095517993886343   0.092135879503793   0.088783293126820

  Columns 11 through 15

   0.085462684979897   0.082176494184811   0.078927167653618   0.075717134039974   0.072548822976575

  Columns 16 through 20

   0.069424690999258   0.066347209963525   0.063318898346231   0.060342359079913   0.057420275171911

  Columns 21 through 25

   0.054555441876930   0.051750796927267   0.049009391617475   0.046334383832559   0.043729010602171

  Columns 26 through 30

   0.041196477587153   0.038739859803037   0.036361976304863   0.034065187694260   0.031851237563249

  Columns 31 through 35

   0.029721113844877   0.027674891784086   0.025711685883192   0.023829676000663   0.022026138744422

  Columns 36 through 40

   0.020297638787860                   0                   0                   0                   0

  Columns 41 through 45

                   0                   0                   0                   0                   0

  Columns 46 through 50

                   0                   0                   0                   0                   0

  Columns 51 through 55

                   0                   0                   0                   0                   0

  Columns 56 through 60

                   0                   0                   0                   0                   0

  Column 61

                   0


inner_code_BER =

  Columns 1 through 5

   0.119815235522945   0.116294245155329   0.112786006101737   0.109292813109344   0.105817019851914

  Columns 6 through 10

   0.102361006903491   0.098927188207309   0.095517993886343   0.092135879503793   0.088783293126820

  Columns 11 through 15

   0.085462684979897   0.082176494184810   0.078927167653616   0.075717134039967   0.072548822976554

  Columns 16 through 20

   0.069424690999190   0.066347209963311   0.063318898345584   0.060342359078017   0.057420275166550

  Columns 21 through 25

   0.054555441862311   0.051750796888816   0.049009391519987   0.046334383594432   0.043729010042157

  Columns 26 through 30

   0.041196476320133   0.038739857047773   0.036361970552329   0.034065176178667   0.031851215499299

  Columns 31 through 35

   0.029721073483230   0.027674821564944   0.025711570474434   0.023829499056470   0.022025892313567

  Columns 36 through 40

   0.020297347367770   0.018639951362604                   0                   0                   0

  Columns 41 through 45

                   0                   0                   0                   0                   0

  Columns 46 through 50

                   0                   0                   0                   0                   0

  Columns 51 through 55

                   0                   0                   0                   0                   0

  Columns 56 through 60

                   0                   0                   0                   0                   0

  Column 61

                   0


outer_code_BER =

  Columns 1 through 5

   0.119815235522946   0.116294245155329   0.112786006101737   0.109292813109344   0.105817019851914

  Columns 6 through 10

   0.102361006903492   0.098927188207309   0.095517993886343   0.092135879503793   0.088783293126820

  Columns 11 through 15

   0.085462684979897   0.082176494184811   0.078927167653618   0.075717134039974   0.072548822976575

  Columns 16 through 20

   0.069424690999258   0.066347209963525   0.063318898346231   0.060342359079913   0.057420275171911

  Columns 21 through 25

   0.054555441876930   0.051750796927267   0.049009391617475   0.046334383832559   0.043729010602171

  Columns 26 through 30

   0.041196477587153   0.038739859803037   0.036361976304863   0.034065187694260   0.031851237563249

  Columns 31 through 35

   0.029721113844877   0.027674891784086   0.025711685883192   0.023829676000663   0.022026138744422

  Columns 36 through 40

   0.020297638787860   0.018640176547894                   0                   0                   0

  Columns 41 through 45

                   0                   0                   0                   0                   0

  Columns 46 through 50

                   0                   0                   0                   0                   0

  Columns 51 through 55

                   0                   0                   0                   0                   0

  Columns 56 through 60

                   0                   0                   0                   0                   0

  Column 61

                   0


inner_code_BER =

  Columns 1 through 5

   0.119815235522945   0.116294245155329   0.112786006101737   0.109292813109344   0.105817019851914

  Columns 6 through 10

   0.102361006903491   0.098927188207309   0.095517993886343   0.092135879503793   0.088783293126820

  Columns 11 through 15

   0.085462684979897   0.082176494184810   0.078927167653616   0.075717134039967   0.072548822976554

  Columns 16 through 20

   0.069424690999190   0.066347209963311   0.063318898345584   0.060342359078017   0.057420275166550

  Columns 21 through 25

   0.054555441862311   0.051750796888816   0.049009391519987   0.046334383594432   0.043729010042157

  Columns 26 through 30

   0.041196476320133   0.038739857047773   0.036361970552329   0.034065176178667   0.031851215499299

  Columns 31 through 35

   0.029721073483230   0.027674821564944   0.025711570474434   0.023829499056470   0.022025892313567

  Columns 36 through 40

   0.020297347367770   0.018639951362604   0.017049627727793                   0                   0

  Columns 41 through 45

                   0                   0                   0                   0                   0

  Columns 46 through 50

                   0                   0                   0                   0                   0

  Columns 51 through 55

                   0                   0                   0                   0                   0

  Columns 56 through 60

                   0                   0                   0                   0                   0

  Column 61

                   0


outer_code_BER =

  Columns 1 through 5

   0.119815235522946   0.116294245155329   0.112786006101737   0.109292813109344   0.105817019851914

  Columns 6 through 10

   0.102361006903492   0.098927188207309   0.095517993886343   0.092135879503793   0.088783293126820

  Columns 11 through 15

   0.085462684979897   0.082176494184811   0.078927167653618   0.075717134039974   0.072548822976575

  Columns 16 through 20

   0.069424690999258   0.066347209963525   0.063318898346231   0.060342359079913   0.057420275171911

  Columns 21 through 25

   0.054555441876930   0.051750796927267   0.049009391617475   0.046334383832559   0.043729010602171

  Columns 26 through 30

   0.041196477587153   0.038739859803037   0.036361976304863   0.034065187694260   0.031851237563249

  Columns 31 through 35

   0.029721113844877   0.027674891784086   0.025711685883192   0.023829676000663   0.022026138744422

  Columns 36 through 40

   0.020297638787860   0.018640176547894   0.017049475142249                   0                   0

  Columns 41 through 45

                   0                   0                   0                   0                   0

  Columns 46 through 50

                   0                   0                   0                   0                   0

  Columns 51 through 55

                   0                   0                   0                   0                   0

  Columns 56 through 60

                   0                   0                   0                   0                   0

  Column 61

                   0


inner_code_BER =

  Columns 1 through 5

   0.119815235522945   0.116294245155329   0.112786006101737   0.109292813109344   0.105817019851914

  Columns 6 through 10

   0.102361006903491   0.098927188207309   0.095517993886343   0.092135879503793   0.088783293126820

  Columns 11 through 15

   0.085462684979897   0.082176494184810   0.078927167653616   0.075717134039967   0.072548822976554

  Columns 16 through 20

   0.069424690999190   0.066347209963311   0.063318898345584   0.060342359078017   0.057420275166550

  Columns 21 through 25

   0.054555441862311   0.051750796888816   0.049009391519987   0.046334383594432   0.043729010042157

  Columns 26 through 30

   0.041196476320133   0.038739857047773   0.036361970552329   0.034065176178667   0.031851215499299

  Columns 31 through 35

   0.029721073483230   0.027674821564944   0.025711570474434   0.023829499056470   0.022025892313567

  Columns 36 through 40

   0.020297347367770   0.018639951362604   0.017049627727793   0.015522505972440                   0

  Columns 41 through 45

                   0                   0                   0                   0                   0

  Columns 46 through 50

                   0                   0                   0                   0                   0

  Columns 51 through 55

                   0                   0                   0                   0                   0

  Columns 56 through 60

                   0                   0                   0                   0                   0

  Column 61

                   0


outer_code_BER =

  Columns 1 through 5

   0.119815235522946   0.116294245155329   0.112786006101737   0.109292813109344   0.105817019851914

  Columns 6 through 10

   0.102361006903492   0.098927188207309   0.095517993886343   0.092135879503793   0.088783293126820

  Columns 11 through 15

   0.085462684979897   0.082176494184811   0.078927167653618   0.075717134039974   0.072548822976575

  Columns 16 through 20

   0.069424690999258   0.066347209963525   0.063318898346231   0.060342359079913   0.057420275171911

  Columns 21 through 25

   0.054555441876930   0.051750796927267   0.049009391617475   0.046334383832559   0.043729010602171

  Columns 26 through 30

   0.041196477587153   0.038739859803037   0.036361976304863   0.034065187694260   0.031851237563249

  Columns 31 through 35

   0.029721113844877   0.027674891784086   0.025711685883192   0.023829676000663   0.022026138744422

  Columns 36 through 40

   0.020297638787860   0.018640176547894   0.017049475142249   0.015521239248738                   0

  Columns 41 through 45

                   0                   0                   0                   0                   0

  Columns 46 through 50

                   0                   0                   0                   0                   0

  Columns 51 through 55

                   0                   0                   0                   0                   0

  Columns 56 through 60

                   0                   0                   0                   0                   0

  Column 61

                   0


inner_code_BER =

  Columns 1 through 5

   0.119815235522945   0.116294245155329   0.112786006101737   0.109292813109344   0.105817019851914

  Columns 6 through 10

   0.102361006903491   0.098927188207309   0.095517993886343   0.092135879503793   0.088783293126820

  Columns 11 through 15

   0.085462684979897   0.082176494184810   0.078927167653616   0.075717134039967   0.072548822976554

  Columns 16 through 20

   0.069424690999190   0.066347209963311   0.063318898345584   0.060342359078017   0.057420275166550

  Columns 21 through 25

   0.054555441862311   0.051750796888816   0.049009391519987   0.046334383594432   0.043729010042157

  Columns 26 through 30

   0.041196476320133   0.038739857047773   0.036361970552329   0.034065176178667   0.031851215499299

  Columns 31 through 35

   0.029721073483230   0.027674821564944   0.025711570474434   0.023829499056470   0.022025892313567

  Columns 36 through 40

   0.020297347367770   0.018639951362604   0.017049627727793   0.015522505972440   0.014055458297414

  Columns 41 through 45

                   0                   0                   0                   0                   0

  Columns 46 through 50

                   0                   0                   0                   0                   0

  Columns 51 through 55

                   0                   0                   0                   0                   0

  Columns 56 through 60

                   0                   0                   0                   0                   0

  Column 61

                   0


outer_code_BER =

  Columns 1 through 5

   0.119815235522946   0.116294245155329   0.112786006101737   0.109292813109344   0.105817019851914

  Columns 6 through 10

   0.102361006903492   0.098927188207309   0.095517993886343   0.092135879503793   0.088783293126820

  Columns 11 through 15

   0.085462684979897   0.082176494184811   0.078927167653618   0.075717134039974   0.072548822976575

  Columns 16 through 20

   0.069424690999258   0.066347209963525   0.063318898346231   0.060342359079913   0.057420275171911

  Columns 21 through 25

   0.054555441876930   0.051750796927267   0.049009391617475   0.046334383832559   0.043729010602171

  Columns 26 through 30

   0.041196477587153   0.038739859803037   0.036361976304863   0.034065187694260   0.031851237563249

  Columns 31 through 35

   0.029721113844877   0.027674891784086   0.025711685883192   0.023829676000663   0.022026138744422

  Columns 36 through 40

   0.020297638787860   0.018640176547894   0.017049475142249   0.015521239248738   0.014051494617325

  Columns 41 through 45

                   0                   0                   0                   0                   0

  Columns 46 through 50

                   0                   0                   0                   0                   0

  Columns 51 through 55

                   0                   0                   0                   0                   0

  Columns 56 through 60

                   0                   0                   0                   0                   0

  Column 61

                   0


inner_code_BER =

  Columns 1 through 5

   0.119815235522945   0.116294245155329   0.112786006101737   0.109292813109344   0.105817019851914

  Columns 6 through 10

   0.102361006903491   0.098927188207309   0.095517993886343   0.092135879503793   0.088783293126820

  Columns 11 through 15

   0.085462684979897   0.082176494184810   0.078927167653616   0.075717134039967   0.072548822976554

  Columns 16 through 20

   0.069424690999190   0.066347209963311   0.063318898345584   0.060342359078017   0.057420275166550

  Columns 21 through 25

   0.054555441862311   0.051750796888816   0.049009391519987   0.046334383594432   0.043729010042157

  Columns 26 through 30

   0.041196476320133   0.038739857047773   0.036361970552329   0.034065176178667   0.031851215499299

  Columns 31 through 35

   0.029721073483230   0.027674821564944   0.025711570474434   0.023829499056470   0.022025892313567

  Columns 36 through 40

   0.020297347367770   0.018639951362604   0.017049627727793   0.015522505972440   0.014055458297414

  Columns 41 through 45

   0.012646818406153                   0                   0                   0                   0

  Columns 46 through 50

                   0                   0                   0                   0                   0

  Columns 51 through 55

                   0                   0                   0                   0                   0

  Columns 56 through 60

                   0                   0                   0                   0                   0

  Column 61

                   0


outer_code_BER =

  Columns 1 through 5

   0.119815235522946   0.116294245155329   0.112786006101737   0.109292813109344   0.105817019851914

  Columns 6 through 10

   0.102361006903492   0.098927188207309   0.095517993886343   0.092135879503793   0.088783293126820

  Columns 11 through 15

   0.085462684979897   0.082176494184811   0.078927167653618   0.075717134039974   0.072548822976575

  Columns 16 through 20

   0.069424690999258   0.066347209963525   0.063318898346231   0.060342359079913   0.057420275171911

  Columns 21 through 25

   0.054555441876930   0.051750796927267   0.049009391617475   0.046334383832559   0.043729010602171

  Columns 26 through 30

   0.041196477587153   0.038739859803037   0.036361976304863   0.034065187694260   0.031851237563249

  Columns 31 through 35

   0.029721113844877   0.027674891784086   0.025711685883192   0.023829676000663   0.022026138744422

  Columns 36 through 40

   0.020297638787860   0.018640176547894   0.017049475142249   0.015521239248738   0.014051494617325

  Columns 41 through 45

   0.012636977476231                   0                   0                   0                   0

  Columns 46 through 50

                   0                   0                   0                   0                   0

  Columns 51 through 55

                   0                   0                   0                   0                   0

  Columns 56 through 60

                   0                   0                   0                   0                   0

  Column 61

                   0


inner_code_BER =

  Columns 1 through 5

   0.119815235522945   0.116294245155329   0.112786006101737   0.109292813109344   0.105817019851914

  Columns 6 through 10

   0.102361006903491   0.098927188207309   0.095517993886343   0.092135879503793   0.088783293126820

  Columns 11 through 15

   0.085462684979897   0.082176494184810   0.078927167653616   0.075717134039967   0.072548822976554

  Columns 16 through 20

   0.069424690999190   0.066347209963311   0.063318898345584   0.060342359078017   0.057420275166550

  Columns 21 through 25

   0.054555441862311   0.051750796888816   0.049009391519987   0.046334383594432   0.043729010042157

  Columns 26 through 30

   0.041196476320133   0.038739857047773   0.036361970552329   0.034065176178667   0.031851215499299

  Columns 31 through 35

   0.029721073483230   0.027674821564944   0.025711570474434   0.023829499056470   0.022025892313567

  Columns 36 through 40

   0.020297347367770   0.018639951362604   0.017049627727793   0.015522505972440   0.014055458297414

  Columns 41 through 45

   0.012646818406153   0.011297388416030                   0                   0                   0

  Columns 46 through 50

                   0                   0                   0                   0                   0

  Columns 51 through 55

                   0                   0                   0                   0                   0

  Columns 56 through 60

                   0                   0                   0                   0                   0

  Column 61

                   0


outer_code_BER =

  Columns 1 through 5

   0.119815235522946   0.116294245155329   0.112786006101737   0.109292813109344   0.105817019851914

  Columns 6 through 10

   0.102361006903492   0.098927188207309   0.095517993886343   0.092135879503793   0.088783293126820

  Columns 11 through 15

   0.085462684979897   0.082176494184811   0.078927167653618   0.075717134039974   0.072548822976575

  Columns 16 through 20

   0.069424690999258   0.066347209963525   0.063318898346231   0.060342359079913   0.057420275171911

  Columns 21 through 25

   0.054555441876930   0.051750796927267   0.049009391617475   0.046334383832559   0.043729010602171

  Columns 26 through 30

   0.041196477587153   0.038739859803037   0.036361976304863   0.034065187694260   0.031851237563249

  Columns 31 through 35

   0.029721113844877   0.027674891784086   0.025711685883192   0.023829676000663   0.022026138744422

  Columns 36 through 40

   0.020297638787860   0.018640176547894   0.017049475142249   0.015521239248738   0.014051494617325

  Columns 41 through 45

   0.012636977476231   0.011275633676128                   0                   0                   0

  Columns 46 through 50

                   0                   0                   0                   0                   0

  Columns 51 through 55

                   0                   0                   0                   0                   0

  Columns 56 through 60

                   0                   0                   0                   0                   0

  Column 61

                   0


inner_code_BER =

  Columns 1 through 5

   0.119815235522945   0.116294245155329   0.112786006101737   0.109292813109344   0.105817019851914

  Columns 6 through 10

   0.102361006903491   0.098927188207309   0.095517993886343   0.092135879503793   0.088783293126820

  Columns 11 through 15

   0.085462684979897   0.082176494184810   0.078927167653616   0.075717134039967   0.072548822976554

  Columns 16 through 20

   0.069424690999190   0.066347209963311   0.063318898345584   0.060342359078017   0.057420275166550

  Columns 21 through 25

   0.054555441862311   0.051750796888816   0.049009391519987   0.046334383594432   0.043729010042157

  Columns 26 through 30

   0.041196476320133   0.038739857047773   0.036361970552329   0.034065176178667   0.031851215499299

  Columns 31 through 35

   0.029721073483230   0.027674821564944   0.025711570474434   0.023829499056470   0.022025892313567

  Columns 36 through 40

   0.020297347367770   0.018639951362604   0.017049627727793   0.015522505972440   0.014055458297414

  Columns 41 through 45

   0.012646818406153   0.011297388416030   0.010011601465000                   0                   0

  Columns 46 through 50

                   0                   0                   0                   0                   0

  Columns 51 through 55

                   0                   0                   0                   0                   0

  Columns 56 through 60

                   0                   0                   0                   0                   0

  Column 61

                   0


outer_code_BER =

  Columns 1 through 5

   0.119815235522946   0.116294245155329   0.112786006101737   0.109292813109344   0.105817019851914

  Columns 6 through 10

   0.102361006903492   0.098927188207309   0.095517993886343   0.092135879503793   0.088783293126820

  Columns 11 through 15

   0.085462684979897   0.082176494184811   0.078927167653618   0.075717134039974   0.072548822976575

  Columns 16 through 20

   0.069424690999258   0.066347209963525   0.063318898346231   0.060342359079913   0.057420275171911

  Columns 21 through 25

   0.054555441876930   0.051750796927267   0.049009391617475   0.046334383832559   0.043729010602171

  Columns 26 through 30

   0.041196477587153   0.038739859803037   0.036361976304863   0.034065187694260   0.031851237563249

  Columns 31 through 35

   0.029721113844877   0.027674891784086   0.025711685883192   0.023829676000663   0.022026138744422

  Columns 36 through 40

   0.020297638787860   0.018640176547894   0.017049475142249   0.015521239248738   0.014051494617325

  Columns 41 through 45

   0.012636977476231   0.011275633676128   0.009967083506730                   0                   0

  Columns 46 through 50

                   0                   0                   0                   0                   0

  Columns 51 through 55

                   0                   0                   0                   0                   0

  Columns 56 through 60

                   0                   0                   0                   0                   0

  Column 61

                   0


inner_code_BER =

  Columns 1 through 5

   0.119815235522945   0.116294245155329   0.112786006101737   0.109292813109344   0.105817019851914

  Columns 6 through 10

   0.102361006903491   0.098927188207309   0.095517993886343   0.092135879503793   0.088783293126820

  Columns 11 through 15

   0.085462684979897   0.082176494184810   0.078927167653616   0.075717134039967   0.072548822976554

  Columns 16 through 20

   0.069424690999190   0.066347209963311   0.063318898345584   0.060342359078017   0.057420275166550

  Columns 21 through 25

   0.054555441862311   0.051750796888816   0.049009391519987   0.046334383594432   0.043729010042157

  Columns 26 through 30

   0.041196476320133   0.038739857047773   0.036361970552329   0.034065176178667   0.031851215499299

  Columns 31 through 35

   0.029721073483230   0.027674821564944   0.025711570474434   0.023829499056470   0.022025892313567

  Columns 36 through 40

   0.020297347367770   0.018639951362604   0.017049627727793   0.015522505972440   0.014055458297414

  Columns 41 through 45

   0.012646818406153   0.011297388416030   0.010011601465000   0.008798676068298                   0

  Columns 46 through 50

                   0                   0                   0                   0                   0

  Columns 51 through 55

                   0                   0                   0                   0                   0

  Columns 56 through 60

                   0                   0                   0                   0                   0

  Column 61

                   0


outer_code_BER =

  Columns 1 through 5

   0.119815235522946   0.116294245155329   0.112786006101737   0.109292813109344   0.105817019851914

  Columns 6 through 10

   0.102361006903492   0.098927188207309   0.095517993886343   0.092135879503793   0.088783293126820

  Columns 11 through 15

   0.085462684979897   0.082176494184811   0.078927167653618   0.075717134039974   0.072548822976575

  Columns 16 through 20

   0.069424690999258   0.066347209963525   0.063318898346231   0.060342359079913   0.057420275171911

  Columns 21 through 25

   0.054555441876930   0.051750796927267   0.049009391617475   0.046334383832559   0.043729010602171

  Columns 26 through 30

   0.041196477587153   0.038739859803037   0.036361976304863   0.034065187694260   0.031851237563249

  Columns 31 through 35

   0.029721113844877   0.027674891784086   0.025711685883192   0.023829676000663   0.022026138744422

  Columns 36 through 40

   0.020297638787860   0.018640176547894   0.017049475142249   0.015521239248738   0.014051494617325

  Columns 41 through 45

   0.012636977476231   0.011275633676128   0.009967083506730   0.008712976113299                   0

  Columns 46 through 50

                   0                   0                   0                   0                   0

  Columns 51 through 55

                   0                   0                   0                   0                   0

  Columns 56 through 60

                   0                   0                   0                   0                   0

  Column 61

                   0


inner_code_BER =

  Columns 1 through 5

   0.119815235522945   0.116294245155329   0.112786006101737   0.109292813109344   0.105817019851914

  Columns 6 through 10

   0.102361006903491   0.098927188207309   0.095517993886343   0.092135879503793   0.088783293126820

  Columns 11 through 15

   0.085462684979897   0.082176494184810   0.078927167653616   0.075717134039967   0.072548822976554

  Columns 16 through 20

   0.069424690999190   0.066347209963311   0.063318898345584   0.060342359078017   0.057420275166550

  Columns 21 through 25

   0.054555441862311   0.051750796888816   0.049009391519987   0.046334383594432   0.043729010042157

  Columns 26 through 30

   0.041196476320133   0.038739857047773   0.036361970552329   0.034065176178667   0.031851215499299

  Columns 31 through 35

   0.029721073483230   0.027674821564944   0.025711570474434   0.023829499056470   0.022025892313567

  Columns 36 through 40

   0.020297347367770   0.018639951362604   0.017049627727793   0.015522505972440   0.014055458297414

  Columns 41 through 45

   0.012646818406153   0.011297388416030   0.010011601465000   0.008798676068298   0.007672668421822

  Columns 46 through 50

                   0                   0                   0                   0                   0

  Columns 51 through 55

                   0                   0                   0                   0                   0

  Columns 56 through 60

                   0                   0                   0                   0                   0

  Column 61

                   0


outer_code_BER =

  Columns 1 through 5

   0.119815235522946   0.116294245155329   0.112786006101737   0.109292813109344   0.105817019851914

  Columns 6 through 10

   0.102361006903492   0.098927188207309   0.095517993886343   0.092135879503793   0.088783293126820

  Columns 11 through 15

   0.085462684979897   0.082176494184811   0.078927167653618   0.075717134039974   0.072548822976575

  Columns 16 through 20

   0.069424690999258   0.066347209963525   0.063318898346231   0.060342359079913   0.057420275171911

  Columns 21 through 25

   0.054555441876930   0.051750796927267   0.049009391617475   0.046334383832559   0.043729010602171

  Columns 26 through 30

   0.041196477587153   0.038739859803037   0.036361976304863   0.034065187694260   0.031851237563249

  Columns 31 through 35

   0.029721113844877   0.027674891784086   0.025711685883192   0.023829676000663   0.022026138744422

  Columns 36 through 40

   0.020297638787860   0.018640176547894   0.017049475142249   0.015521239248738   0.014051494617325

  Columns 41 through 45

   0.012636977476231   0.011275633676128   0.009967083506730   0.008712976113299   0.007516336190290

  Columns 46 through 50

                   0                   0                   0                   0                   0

  Columns 51 through 55

                   0                   0                   0                   0                   0

  Columns 56 through 60

                   0                   0                   0                   0                   0

  Column 61

                   0


inner_code_BER =

  Columns 1 through 5

   0.119815235522945   0.116294245155329   0.112786006101737   0.109292813109344   0.105817019851914

  Columns 6 through 10

   0.102361006903491   0.098927188207309   0.095517993886343   0.092135879503793   0.088783293126820

  Columns 11 through 15

   0.085462684979897   0.082176494184810   0.078927167653616   0.075717134039967   0.072548822976554

  Columns 16 through 20

   0.069424690999190   0.066347209963311   0.063318898345584   0.060342359078017   0.057420275166550

  Columns 21 through 25

   0.054555441862311   0.051750796888816   0.049009391519987   0.046334383594432   0.043729010042157

  Columns 26 through 30

   0.041196476320133   0.038739857047773   0.036361970552329   0.034065176178667   0.031851215499299

  Columns 31 through 35

   0.029721073483230   0.027674821564944   0.025711570474434   0.023829499056470   0.022025892313567

  Columns 36 through 40

   0.020297347367770   0.018639951362604   0.017049627727793   0.015522505972440   0.014055458297414

  Columns 41 through 45

   0.012646818406153   0.011297388416030   0.010011601465000   0.008798676068298   0.007672668421822

  Columns 46 through 50

   0.006650237526189                   0                   0                   0                   0

  Columns 51 through 55

                   0                   0                   0                   0                   0

  Columns 56 through 60

                   0                   0                   0                   0                   0

  Column 61

                   0


outer_code_BER =

  Columns 1 through 5

   0.119815235522946   0.116294245155329   0.112786006101737   0.109292813109344   0.105817019851914

  Columns 6 through 10

   0.102361006903492   0.098927188207309   0.095517993886343   0.092135879503793   0.088783293126820

  Columns 11 through 15

   0.085462684979897   0.082176494184811   0.078927167653618   0.075717134039974   0.072548822976575

  Columns 16 through 20

   0.069424690999258   0.066347209963525   0.063318898346231   0.060342359079913   0.057420275171911

  Columns 21 through 25

   0.054555441876930   0.051750796927267   0.049009391617475   0.046334383832559   0.043729010602171

  Columns 26 through 30

   0.041196477587153   0.038739859803037   0.036361976304863   0.034065187694260   0.031851237563249

  Columns 31 through 35

   0.029721113844877   0.027674891784086   0.025711685883192   0.023829676000663   0.022026138744422

  Columns 36 through 40

   0.020297638787860   0.018640176547894   0.017049475142249   0.015521239248738   0.014051494617325

  Columns 41 through 45

   0.012636977476231   0.011275633676128   0.009967083506730   0.008712976113299   0.007516336190290

  Columns 46 through 50

   0.006378680420874                   0                   0                   0                   0

  Columns 51 through 55

                   0                   0                   0                   0                   0

  Columns 56 through 60

                   0                   0                   0                   0                   0

  Column 61

                   0


inner_code_BER =

  Columns 1 through 5

   0.119815235522945   0.116294245155329   0.112786006101737   0.109292813109344   0.105817019851914

  Columns 6 through 10

   0.102361006903491   0.098927188207309   0.095517993886343   0.092135879503793   0.088783293126820

  Columns 11 through 15

   0.085462684979897   0.082176494184810   0.078927167653616   0.075717134039967   0.072548822976554

  Columns 16 through 20

   0.069424690999190   0.066347209963311   0.063318898345584   0.060342359078017   0.057420275166550

  Columns 21 through 25

   0.054555441862311   0.051750796888816   0.049009391519987   0.046334383594432   0.043729010042157

  Columns 26 through 30

   0.041196476320133   0.038739857047773   0.036361970552329   0.034065176178667   0.031851215499299

  Columns 31 through 35

   0.029721073483230   0.027674821564944   0.025711570474434   0.023829499056470   0.022025892313567

  Columns 36 through 40

   0.020297347367770   0.018639951362604   0.017049627727793   0.015522505972440   0.014055458297414

  Columns 41 through 45

   0.012646818406153   0.011297388416030   0.010011601465000   0.008798676068298   0.007672668421822

  Columns 46 through 50

   0.006650237526189   0.005745576887221                   0                   0                   0

  Columns 51 through 55

                   0                   0                   0                   0                   0

  Columns 56 through 60

                   0                   0                   0                   0                   0

  Column 61

                   0


outer_code_BER =

  Columns 1 through 5

   0.119815235522946   0.116294245155329   0.112786006101737   0.109292813109344   0.105817019851914

  Columns 6 through 10

   0.102361006903492   0.098927188207309   0.095517993886343   0.092135879503793   0.088783293126820

  Columns 11 through 15

   0.085462684979897   0.082176494184811   0.078927167653618   0.075717134039974   0.072548822976575

  Columns 16 through 20

   0.069424690999258   0.066347209963525   0.063318898346231   0.060342359079913   0.057420275171911

  Columns 21 through 25

   0.054555441876930   0.051750796927267   0.049009391617475   0.046334383832559   0.043729010602171

  Columns 26 through 30

   0.041196477587153   0.038739859803037   0.036361976304863   0.034065187694260   0.031851237563249

  Columns 31 through 35

   0.029721113844877   0.027674891784086   0.025711685883192   0.023829676000663   0.022026138744422

  Columns 36 through 40

   0.020297638787860   0.018640176547894   0.017049475142249   0.015521239248738   0.014051494617325

  Columns 41 through 45

   0.012636977476231   0.011275633676128   0.009967083506730   0.008712976113299   0.007516336190290

  Columns 46 through 50

   0.006378680420874   0.005292599886329                   0                   0                   0

  Columns 51 through 55

                   0                   0                   0                   0                   0

  Columns 56 through 60

                   0                   0                   0                   0                   0

  Column 61

                   0


inner_code_BER =

  Columns 1 through 5

   0.119815235522945   0.116294245155329   0.112786006101737   0.109292813109344   0.105817019851914

  Columns 6 through 10

   0.102361006903491   0.098927188207309   0.095517993886343   0.092135879503793   0.088783293126820

  Columns 11 through 15

   0.085462684979897   0.082176494184810   0.078927167653616   0.075717134039967   0.072548822976554

  Columns 16 through 20

   0.069424690999190   0.066347209963311   0.063318898345584   0.060342359078017   0.057420275166550

  Columns 21 through 25

   0.054555441862311   0.051750796888816   0.049009391519987   0.046334383594432   0.043729010042157

  Columns 26 through 30

   0.041196476320133   0.038739857047773   0.036361970552329   0.034065176178667   0.031851215499299

  Columns 31 through 35

   0.029721073483230   0.027674821564944   0.025711570474434   0.023829499056470   0.022025892313567

  Columns 36 through 40

   0.020297347367770   0.018639951362604   0.017049627727793   0.015522505972440   0.014055458297414

  Columns 41 through 45

   0.012646818406153   0.011297388416030   0.010011601465000   0.008798676068298   0.007672668421822

  Columns 46 through 50

   0.006650237526189   0.005745576887221   0.004964758339097                   0                   0

  Columns 51 through 55

                   0                   0                   0                   0                   0

  Columns 56 through 60

                   0                   0                   0                   0                   0

  Column 61

                   0


outer_code_BER =

  Columns 1 through 5

   0.119815235522946   0.116294245155329   0.112786006101737   0.109292813109344   0.105817019851914

  Columns 6 through 10

   0.102361006903492   0.098927188207309   0.095517993886343   0.092135879503793   0.088783293126820

  Columns 11 through 15

   0.085462684979897   0.082176494184811   0.078927167653618   0.075717134039974   0.072548822976575

  Columns 16 through 20

   0.069424690999258   0.066347209963525   0.063318898346231   0.060342359079913   0.057420275171911

  Columns 21 through 25

   0.054555441876930   0.051750796927267   0.049009391617475   0.046334383832559   0.043729010602171

  Columns 26 through 30

   0.041196477587153   0.038739859803037   0.036361976304863   0.034065187694260   0.031851237563249

  Columns 31 through 35

   0.029721113844877   0.027674891784086   0.025711685883192   0.023829676000663   0.022026138744422

  Columns 36 through 40

   0.020297638787860   0.018640176547894   0.017049475142249   0.015521239248738   0.014051494617325

  Columns 41 through 45

   0.012636977476231   0.011275633676128   0.009967083506730   0.008712976113299   0.007516336190290

  Columns 46 through 50

   0.006378680420874   0.005292599886329   0.004222710008456                   0                   0

  Columns 51 through 55

                   0                   0                   0                   0                   0

  Columns 56 through 60

                   0                   0                   0                   0                   0

  Column 61

                   0


inner_code_BER =

  Columns 1 through 5

   0.119815235522945   0.116294245155329   0.112786006101737   0.109292813109344   0.105817019851914

  Columns 6 through 10

   0.102361006903491   0.098927188207309   0.095517993886343   0.092135879503793   0.088783293126820

  Columns 11 through 15

   0.085462684979897   0.082176494184810   0.078927167653616   0.075717134039967   0.072548822976554

  Columns 16 through 20

   0.069424690999190   0.066347209963311   0.063318898345584   0.060342359078017   0.057420275166550

  Columns 21 through 25

   0.054555441862311   0.051750796888816   0.049009391519987   0.046334383594432   0.043729010042157

  Columns 26 through 30

   0.041196476320133   0.038739857047773   0.036361970552329   0.034065176178667   0.031851215499299

  Columns 31 through 35

   0.029721073483230   0.027674821564944   0.025711570474434   0.023829499056470   0.022025892313567

  Columns 36 through 40

   0.020297347367770   0.018639951362604   0.017049627727793   0.015522505972440   0.014055458297414

  Columns 41 through 45

   0.012646818406153   0.011297388416030   0.010011601465000   0.008798676068298   0.007672668421822

  Columns 46 through 50

   0.006650237526189   0.005745576887221   0.004964758339097   0.004303505467734                   0

  Columns 51 through 55

                   0                   0                   0                   0                   0

  Columns 56 through 60

                   0                   0                   0                   0                   0

  Column 61

                   0


outer_code_BER =

  Columns 1 through 5

   0.119815235522946   0.116294245155329   0.112786006101737   0.109292813109344   0.105817019851914

  Columns 6 through 10

   0.102361006903492   0.098927188207309   0.095517993886343   0.092135879503793   0.088783293126820

  Columns 11 through 15

   0.085462684979897   0.082176494184811   0.078927167653618   0.075717134039974   0.072548822976575

  Columns 16 through 20

   0.069424690999258   0.066347209963525   0.063318898346231   0.060342359079913   0.057420275171911

  Columns 21 through 25

   0.054555441876930   0.051750796927267   0.049009391617475   0.046334383832559   0.043729010602171

  Columns 26 through 30

   0.041196477587153   0.038739859803037   0.036361976304863   0.034065187694260   0.031851237563249

  Columns 31 through 35

   0.029721113844877   0.027674891784086   0.025711685883192   0.023829676000663   0.022026138744422

  Columns 36 through 40

   0.020297638787860   0.018640176547894   0.017049475142249   0.015521239248738   0.014051494617325

  Columns 41 through 45

   0.012636977476231   0.011275633676128   0.009967083506730   0.008712976113299   0.007516336190290

  Columns 46 through 50

   0.006378680420874   0.005292599886329   0.004222710008456   0.003004725988597                   0

  Columns 51 through 55

                   0                   0                   0                   0                   0

  Columns 56 through 60

                   0                   0                   0                   0                   0

  Column 61

                   0


inner_code_BER =

  Columns 1 through 5

   0.119815235522945   0.116294245155329   0.112786006101737   0.109292813109344   0.105817019851914

  Columns 6 through 10

   0.102361006903491   0.098927188207309   0.095517993886343   0.092135879503793   0.088783293126820

  Columns 11 through 15

   0.085462684979897   0.082176494184810   0.078927167653616   0.075717134039967   0.072548822976554

  Columns 16 through 20

   0.069424690999190   0.066347209963311   0.063318898345584   0.060342359078017   0.057420275166550

  Columns 21 through 25

   0.054555441862311   0.051750796888816   0.049009391519987   0.046334383594432   0.043729010042157

  Columns 26 through 30

   0.041196476320133   0.038739857047773   0.036361970552329   0.034065176178667   0.031851215499299

  Columns 31 through 35

   0.029721073483230   0.027674821564944   0.025711570474434   0.023829499056470   0.022025892313567

  Columns 36 through 40

   0.020297347367770   0.018639951362604   0.017049627727793   0.015522505972440   0.014055458297414

  Columns 41 through 45

   0.012646818406153   0.011297388416030   0.010011601465000   0.008798676068298   0.007672668421822

  Columns 46 through 50

   0.006650237526189   0.005745576887221   0.004964758339097   0.004303505467734   0.003749469009509

  Columns 51 through 55

                   0                   0                   0                   0                   0

  Columns 56 through 60

                   0                   0                   0                   0                   0

  Column 61

                   0


outer_code_BER =

  Columns 1 through 5

   0.119815235522946   0.116294245155329   0.112786006101737   0.109292813109344   0.105817019851914

  Columns 6 through 10

   0.102361006903492   0.098927188207309   0.095517993886343   0.092135879503793   0.088783293126820

  Columns 11 through 15

   0.085462684979897   0.082176494184811   0.078927167653618   0.075717134039974   0.072548822976575

  Columns 16 through 20

   0.069424690999258   0.066347209963525   0.063318898346231   0.060342359079913   0.057420275171911

  Columns 21 through 25

   0.054555441876930   0.051750796927267   0.049009391617475   0.046334383832559   0.043729010602171

  Columns 26 through 30

   0.041196477587153   0.038739859803037   0.036361976304863   0.034065187694260   0.031851237563249

  Columns 31 through 35

   0.029721113844877   0.027674891784086   0.025711685883192   0.023829676000663   0.022026138744422

  Columns 36 through 40

   0.020297638787860   0.018640176547894   0.017049475142249   0.015521239248738   0.014051494617325

  Columns 41 through 45

   0.012636977476231   0.011275633676128   0.009967083506730   0.008712976113299   0.007516336190290

  Columns 46 through 50

   0.006378680420874   0.005292599886329   0.004222710008456   0.003004725988597   0.000259757170731

  Columns 51 through 55

                   0                   0                   0                   0                   0

  Columns 56 through 60

                   0                   0                   0                   0                   0

  Column 61

                   0


inner_code_BER =

  Columns 1 through 5

   0.119815235522945   0.116294245155329   0.112786006101737   0.109292813109344   0.105817019851914

  Columns 6 through 10

   0.102361006903491   0.098927188207309   0.095517993886343   0.092135879503793   0.088783293126820

  Columns 11 through 15

   0.085462684979897   0.082176494184810   0.078927167653616   0.075717134039967   0.072548822976554

  Columns 16 through 20

   0.069424690999190   0.066347209963311   0.063318898345584   0.060342359078017   0.057420275166550

  Columns 21 through 25

   0.054555441862311   0.051750796888816   0.049009391519987   0.046334383594432   0.043729010042157

  Columns 26 through 30

   0.041196476320133   0.038739857047773   0.036361970552329   0.034065176178667   0.031851215499299

  Columns 31 through 35

   0.029721073483230   0.027674821564944   0.025711570474434   0.023829499056470   0.022025892313567

  Columns 36 through 40

   0.020297347367770   0.018639951362604   0.017049627727793   0.015522505972440   0.014055458297414

  Columns 41 through 45

   0.012646818406153   0.011297388416030   0.010011601465000   0.008798676068298   0.007672668421822

  Columns 46 through 50

   0.006650237526189   0.005745576887221   0.004964758339097   0.004303505467734   0.003749469009509

  Columns 51 through 55

   0.003286652220474                   0                   0                   0                   0

  Columns 56 through 60

                   0                   0                   0                   0                   0

  Column 61

                   0


outer_code_BER =

  Columns 1 through 5

   0.119815235522946   0.116294245155329   0.112786006101737   0.109292813109344   0.105817019851914

  Columns 6 through 10

   0.102361006903492   0.098927188207309   0.095517993886343   0.092135879503793   0.088783293126820

  Columns 11 through 15

   0.085462684979897   0.082176494184811   0.078927167653618   0.075717134039974   0.072548822976575

  Columns 16 through 20

   0.069424690999258   0.066347209963525   0.063318898346231   0.060342359079913   0.057420275171911

  Columns 21 through 25

   0.054555441876930   0.051750796927267   0.049009391617475   0.046334383832559   0.043729010602171

  Columns 26 through 30

   0.041196477587153   0.038739859803037   0.036361976304863   0.034065187694260   0.031851237563249

  Columns 31 through 35

   0.029721113844877   0.027674891784086   0.025711685883192   0.023829676000663   0.022026138744422

  Columns 36 through 40

   0.020297638787860   0.018640176547894   0.017049475142249   0.015521239248738   0.014051494617325

  Columns 41 through 45

   0.012636977476231   0.011275633676128   0.009967083506730   0.008712976113299   0.007516336190290

  Columns 46 through 50

   0.006378680420874   0.005292599886329   0.004222710008456   0.003004725988597   0.000259757170731

  Columns 51 through 55

   0.000000929157107                   0                   0                   0                   0

  Columns 56 through 60

                   0                   0                   0                   0                   0

  Column 61

                   0

��ǰ�����������ѵ���Ŀ�������ʣ������Ϊ5.00 dB

inner_code_BER =

  Columns 1 through 5

   0.119815235522945   0.116294245155329   0.112786006101737   0.109292813109344   0.105817019851914

  Columns 6 through 10

   0.102361006903491   0.098927188207309   0.095517993886343   0.092135879503793   0.088783293126820

  Columns 11 through 15

   0.085462684979897   0.082176494184810   0.078927167653616   0.075717134039967   0.072548822976554

  Columns 16 through 20

   0.069424690999190   0.066347209963311   0.063318898345584   0.060342359078017   0.057420275166550

  Columns 21 through 25

   0.054555441862311   0.051750796888816   0.049009391519987   0.046334383594432   0.043729010042157

  Columns 26 through 30

   0.041196476320133   0.038739857047773   0.036361970552329   0.034065176178667   0.031851215499299

  Columns 31 through 35

   0.029721073483230   0.027674821564944   0.025711570474434   0.023829499056470   0.022025892313567

  Columns 36 through 40

   0.020297347367770   0.018639951362604   0.017049627727793   0.015522505972440   0.014055458297414

  Columns 41 through 45

   0.012646818406153   0.011297388416030   0.010011601465000   0.008798676068298   0.007672668421822

  Columns 46 through 50

   0.006650237526189   0.005745576887221   0.004964758339097   0.004303505467734   0.003749469009509

  Columns 51 through 55

   0.003286652220474   0.002899039597849                   0                   0                   0

  Columns 56 through 60

                   0                   0                   0                   0                   0

  Column 61

                   0


inner_code_BER =

  Columns 1 through 5

   0.119815235522945   0.116294245155329   0.112786006101737   0.109292813109344   0.105817019851914

  Columns 6 through 10

   0.102361006903491   0.098927188207309   0.095517993886343   0.092135879503793   0.088783293126820

  Columns 11 through 15

   0.085462684979897   0.082176494184810   0.078927167653616   0.075717134039967   0.072548822976554

  Columns 16 through 20

   0.069424690999190   0.066347209963311   0.063318898345584   0.060342359078017   0.057420275166550

  Columns 21 through 25

   0.054555441862311   0.051750796888816   0.049009391519987   0.046334383594432   0.043729010042157

  Columns 26 through 30

   0.041196476320133   0.038739857047773   0.036361970552329   0.034065176178667   0.031851215499299

  Columns 31 through 35

   0.029721073483230   0.027674821564944   0.025711570474434   0.023829499056470   0.022025892313567

  Columns 36 through 40

   0.020297347367770   0.018639951362604   0.017049627727793   0.015522505972440   0.014055458297414

  Columns 41 through 45

   0.012646818406153   0.011297388416030   0.010011601465000   0.008798676068298   0.007672668421822

  Columns 46 through 50

   0.006650237526189   0.005745576887221   0.004964758339097   0.004303505467734   0.003749469009509

  Columns 51 through 55

   0.003286652220474   0.002899039597849   0.002572501877815                   0                   0

  Columns 56 through 60

                   0                   0                   0                   0                   0

  Column 61

                   0


inner_code_BER =

  Columns 1 through 5

   0.119815235522945   0.116294245155329   0.112786006101737   0.109292813109344   0.105817019851914

  Columns 6 through 10

   0.102361006903491   0.098927188207309   0.095517993886343   0.092135879503793   0.088783293126820

  Columns 11 through 15

   0.085462684979897   0.082176494184810   0.078927167653616   0.075717134039967   0.072548822976554

  Columns 16 through 20

   0.069424690999190   0.066347209963311   0.063318898345584   0.060342359078017   0.057420275166550

  Columns 21 through 25

   0.054555441862311   0.051750796888816   0.049009391519987   0.046334383594432   0.043729010042157

  Columns 26 through 30

   0.041196476320133   0.038739857047773   0.036361970552329   0.034065176178667   0.031851215499299

  Columns 31 through 35

   0.029721073483230   0.027674821564944   0.025711570474434   0.023829499056470   0.022025892313567

  Columns 36 through 40

   0.020297347367770   0.018639951362604   0.017049627727793   0.015522505972440   0.014055458297414

  Columns 41 through 45

   0.012646818406153   0.011297388416030   0.010011601465000   0.008798676068298   0.007672668421822

  Columns 46 through 50

   0.006650237526189   0.005745576887221   0.004964758339097   0.004303505467734   0.003749469009509

  Columns 51 through 55

   0.003286652220474   0.002899039597849   0.002572501877815   0.002295364629241                   0

  Columns 56 through 60

                   0                   0                   0                   0                   0

  Column 61

                   0


inner_code_BER =

  Columns 1 through 5

   0.119815235522945   0.116294245155329   0.112786006101737   0.109292813109344   0.105817019851914

  Columns 6 through 10

   0.102361006903491   0.098927188207309   0.095517993886343   0.092135879503793   0.088783293126820

  Columns 11 through 15

   0.085462684979897   0.082176494184810   0.078927167653616   0.075717134039967   0.072548822976554

  Columns 16 through 20

   0.069424690999190   0.066347209963311   0.063318898345584   0.060342359078017   0.057420275166550

  Columns 21 through 25

   0.054555441862311   0.051750796888816   0.049009391519987   0.046334383594432   0.043729010042157

  Columns 26 through 30

   0.041196476320133   0.038739857047773   0.036361970552329   0.034065176178667   0.031851215499299

  Columns 31 through 35

   0.029721073483230   0.027674821564944   0.025711570474434   0.023829499056470   0.022025892313567

  Columns 36 through 40

   0.020297347367770   0.018639951362604   0.017049627727793   0.015522505972440   0.014055458297414

  Columns 41 through 45

   0.012646818406153   0.011297388416030   0.010011601465000   0.008798676068298   0.007672668421822

  Columns 46 through 50

   0.006650237526189   0.005745576887221   0.004964758339097   0.004303505467734   0.003749469009509

  Columns 51 through 55

   0.003286652220474   0.002899039597849   0.002572501877815   0.002295364629241   0.002058288842226

  Columns 56 through 60

                   0                   0                   0                   0                   0

  Column 61

                   0


inner_code_BER =

  Columns 1 through 5

   0.119815235522945   0.116294245155329   0.112786006101737   0.109292813109344   0.105817019851914

  Columns 6 through 10

   0.102361006903491   0.098927188207309   0.095517993886343   0.092135879503793   0.088783293126820

  Columns 11 through 15

   0.085462684979897   0.082176494184810   0.078927167653616   0.075717134039967   0.072548822976554

  Columns 16 through 20

   0.069424690999190   0.066347209963311   0.063318898345584   0.060342359078017   0.057420275166550

  Columns 21 through 25

   0.054555441862311   0.051750796888816   0.049009391519987   0.046334383594432   0.043729010042157

  Columns 26 through 30

   0.041196476320133   0.038739857047773   0.036361970552329   0.034065176178667   0.031851215499299

  Columns 31 through 35

   0.029721073483230   0.027674821564944   0.025711570474434   0.023829499056470   0.022025892313567

  Columns 36 through 40

   0.020297347367770   0.018639951362604   0.017049627727793   0.015522505972440   0.014055458297414

  Columns 41 through 45

   0.012646818406153   0.011297388416030   0.010011601465000   0.008798676068298   0.007672668421822

  Columns 46 through 50

   0.006650237526189   0.005745576887221   0.004964758339097   0.004303505467734   0.003749469009509

  Columns 51 through 55

   0.003286652220474   0.002899039597849   0.002572501877815   0.002295364629241   0.002058288842226

  Columns 56 through 60

   0.001853898303804                   0                   0                   0                   0

  Column 61

                   0


inner_code_BER =

  Columns 1 through 5

   0.119815235522945   0.116294245155329   0.112786006101737   0.109292813109344   0.105817019851914

  Columns 6 through 10

   0.102361006903491   0.098927188207309   0.095517993886343   0.092135879503793   0.088783293126820

  Columns 11 through 15

   0.085462684979897   0.082176494184810   0.078927167653616   0.075717134039967   0.072548822976554

  Columns 16 through 20

   0.069424690999190   0.066347209963311   0.063318898345584   0.060342359078017   0.057420275166550

  Columns 21 through 25

   0.054555441862311   0.051750796888816   0.049009391519987   0.046334383594432   0.043729010042157

  Columns 26 through 30

   0.041196476320133   0.038739857047773   0.036361970552329   0.034065176178667   0.031851215499299

  Columns 31 through 35

   0.029721073483230   0.027674821564944   0.025711570474434   0.023829499056470   0.022025892313567

  Columns 36 through 40

   0.020297347367770   0.018639951362604   0.017049627727793   0.015522505972440   0.014055458297414

  Columns 41 through 45

   0.012646818406153   0.011297388416030   0.010011601465000   0.008798676068298   0.007672668421822

  Columns 46 through 50

   0.006650237526189   0.005745576887221   0.004964758339097   0.004303505467734   0.003749469009509

  Columns 51 through 55

   0.003286652220474   0.002899039597849   0.002572501877815   0.002295364629241   0.002058288842226

  Columns 56 through 60

   0.001853898303804   0.001676402623400                   0                   0                   0

  Column 61

                   0


inner_code_BER =

  Columns 1 through 5

   0.119815235522945   0.116294245155329   0.112786006101737   0.109292813109344   0.105817019851914

  Columns 6 through 10

   0.102361006903491   0.098927188207309   0.095517993886343   0.092135879503793   0.088783293126820

  Columns 11 through 15

   0.085462684979897   0.082176494184810   0.078927167653616   0.075717134039967   0.072548822976554

  Columns 16 through 20

   0.069424690999190   0.066347209963311   0.063318898345584   0.060342359078017   0.057420275166550

  Columns 21 through 25

   0.054555441862311   0.051750796888816   0.049009391519987   0.046334383594432   0.043729010042157

  Columns 26 through 30

   0.041196476320133   0.038739857047773   0.036361970552329   0.034065176178667   0.031851215499299

  Columns 31 through 35

   0.029721073483230   0.027674821564944   0.025711570474434   0.023829499056470   0.022025892313567

  Columns 36 through 40

   0.020297347367770   0.018639951362604   0.017049627727793   0.015522505972440   0.014055458297414

  Columns 41 through 45

   0.012646818406153   0.011297388416030   0.010011601465000   0.008798676068298   0.007672668421822

  Columns 46 through 50

   0.006650237526189   0.005745576887221   0.004964758339097   0.004303505467734   0.003749469009509

  Columns 51 through 55

   0.003286652220474   0.002899039597849   0.002572501877815   0.002295364629241   0.002058288842226

  Columns 56 through 60

   0.001853898303804   0.001676402623400   0.001521211172652                   0                   0

  Column 61

                   0


inner_code_BER =

  Columns 1 through 5

   0.119815235522945   0.116294245155329   0.112786006101737   0.109292813109344   0.105817019851914

  Columns 6 through 10

   0.102361006903491   0.098927188207309   0.095517993886343   0.092135879503793   0.088783293126820

  Columns 11 through 15

   0.085462684979897   0.082176494184810   0.078927167653616   0.075717134039967   0.072548822976554

  Columns 16 through 20

   0.069424690999190   0.066347209963311   0.063318898345584   0.060342359078017   0.057420275166550

  Columns 21 through 25

   0.054555441862311   0.051750796888816   0.049009391519987   0.046334383594432   0.043729010042157

  Columns 26 through 30

   0.041196476320133   0.038739857047773   0.036361970552329   0.034065176178667   0.031851215499299

  Columns 31 through 35

   0.029721073483230   0.027674821564944   0.025711570474434   0.023829499056470   0.022025892313567

  Columns 36 through 40

   0.020297347367770   0.018639951362604   0.017049627727793   0.015522505972440   0.014055458297414

  Columns 41 through 45

   0.012646818406153   0.011297388416030   0.010011601465000   0.008798676068298   0.007672668421822

  Columns 46 through 50

   0.006650237526189   0.005745576887221   0.004964758339097   0.004303505467734   0.003749469009509

  Columns 51 through 55

   0.003286652220474   0.002899039597849   0.002572501877815   0.002295364629241   0.002058288842226

  Columns 56 through 60

   0.001853898303804   0.001676402623400   0.001521211172652   0.001384690923860                   0

  Column 61

                   0


inner_code_BER =

  Columns 1 through 5

   0.119815235522945   0.116294245155329   0.112786006101737   0.109292813109344   0.105817019851914

  Columns 6 through 10

   0.102361006903491   0.098927188207309   0.095517993886343   0.092135879503793   0.088783293126820

  Columns 11 through 15

   0.085462684979897   0.082176494184810   0.078927167653616   0.075717134039967   0.072548822976554

  Columns 16 through 20

   0.069424690999190   0.066347209963311   0.063318898345584   0.060342359078017   0.057420275166550

  Columns 21 through 25

   0.054555441862311   0.051750796888816   0.049009391519987   0.046334383594432   0.043729010042157

  Columns 26 through 30

   0.041196476320133   0.038739857047773   0.036361970552329   0.034065176178667   0.031851215499299

  Columns 31 through 35

   0.029721073483230   0.027674821564944   0.025711570474434   0.023829499056470   0.022025892313567

  Columns 36 through 40

   0.020297347367770   0.018639951362604   0.017049627727793   0.015522505972440   0.014055458297414

  Columns 41 through 45

   0.012646818406153   0.011297388416030   0.010011601465000   0.008798676068298   0.007672668421822

  Columns 46 through 50

   0.006650237526189   0.005745576887221   0.004964758339097   0.004303505467734   0.003749469009509

  Columns 51 through 55

   0.003286652220474   0.002899039597849   0.002572501877815   0.002295364629241   0.002058288842226

  Columns 56 through 60

   0.001853898303804   0.001676402623400   0.001521211172652   0.001384690923860   0.001263927452797

  Column 61

                   0


inner_code_BER =

  Columns 1 through 5

   0.119815235522945   0.116294245155329   0.112786006101737   0.109292813109344   0.105817019851914

  Columns 6 through 10

   0.102361006903491   0.098927188207309   0.095517993886343   0.092135879503793   0.088783293126820

  Columns 11 through 15

   0.085462684979897   0.082176494184810   0.078927167653616   0.075717134039967   0.072548822976554

  Columns 16 through 20

   0.069424690999190   0.066347209963311   0.063318898345584   0.060342359078017   0.057420275166550

  Columns 21 through 25

   0.054555441862311   0.051750796888816   0.049009391519987   0.046334383594432   0.043729010042157

  Columns 26 through 30

   0.041196476320133   0.038739857047773   0.036361970552329   0.034065176178667   0.031851215499299

  Columns 31 through 35

   0.029721073483230   0.027674821564944   0.025711570474434   0.023829499056470   0.022025892313567

  Columns 36 through 40

   0.020297347367770   0.018639951362604   0.017049627727793   0.015522505972440   0.014055458297414

  Columns 41 through 45

   0.012646818406153   0.011297388416030   0.010011601465000   0.008798676068298   0.007672668421822

  Columns 46 through 50

   0.006650237526189   0.005745576887221   0.004964758339097   0.004303505467734   0.003749469009509

  Columns 51 through 55

   0.003286652220474   0.002899039597849   0.002572501877815   0.002295364629241   0.002058288842226

  Columns 56 through 60

   0.001853898303804   0.001676402623400   0.001521211172652   0.001384690923860   0.001263927452797

  Column 61

   0.001156562277102

Elapsed time is 34858.745435 seconds.
