# Supplementary material for: An Efficient Design of Systematic Rateless Codes
Source: Hindawi journal article supplement (doi:10.1155/2020/8068414), 2020-05-19
Supplement: f1 [file 8068414.f1.zip › supplementary files/Matlab_code_for_Figure1/BER_by_DDE/仿真结果/BER_by_DDE_rician_rate_1_2_dist1_Ns.txt]

µ±Ç°ÐÅµÀÎªÀµË¹ÐÅµÀ£¬²ÎÊýgamma=2

EbN0indB_vec =

  Columns 1 through 5

                   0   0.100000000000000   0.200000000000000   0.300000000000000   0.400000000000000

  Columns 6 through 10

   0.500000000000000   0.600000000000000   0.700000000000000   0.800000000000000   0.900000000000000

  Columns 11 through 15

   1.000000000000000   1.100000000000000   1.200000000000000   1.300000000000000   1.400000000000000

  Columns 16 through 20

   1.500000000000000   1.600000000000000   1.700000000000000   1.800000000000000   1.900000000000000

  Columns 21 through 25

   2.000000000000000   2.100000000000000   2.200000000000000   2.300000000000000   2.400000000000000

  Columns 26 through 30

   2.500000000000000   2.600000000000000   2.700000000000000   2.800000000000000   2.900000000000000

  Columns 31 through 35

   3.000000000000000   3.100000000000000   3.200000000000000   3.300000000000000   3.400000000000000

  Columns 36 through 40

   3.500000000000000   3.600000000000000   3.700000000000000   3.800000000000000   3.900000000000000

  Columns 41 through 45

   4.000000000000000   4.100000000000000   4.200000000000000   4.300000000000000   4.400000000000000

  Columns 46 through 50

   4.500000000000000   4.600000000000000   4.700000000000000   4.800000000000000   4.900000000000000

  Columns 51 through 55

   5.000000000000000   5.100000000000000   5.200000000000000   5.300000000000000   5.400000000000000

  Columns 56 through 60

   5.500000000000000   5.600000000000000   5.700000000000000   5.800000000000000   5.900000000000000

  Column 61

   6.000000000000000

ÖÆ±í³É¹¦
µ±Ç°Ñ¡ÔñRaptorÂë
µ±Ç°Ñ¡Ôñ·ÇÏµÍ³Âë
×ÜÂëÂÊ=0.50000, ÍâÂëÂëÂÊ=0.98039, ÄÚÂëÂëÂÊ=0.51000

out_node_index =

     1     2     3     4     5    11    40


ans =

  Columns 1 through 5

   0.009670000000000   0.450250000000000   0.209370000000000   0.023320000000000   0.147350000000000

  Columns 6 through 7

   0.112249000000000   0.047550000000000


inner_code_BER =

  Columns 1 through 5

   0.432228119530795                   0                   0                   0                   0

  Columns 6 through 10

                   0                   0                   0                   0                   0

  Columns 11 through 15

                   0                   0                   0                   0                   0

  Columns 16 through 20

                   0                   0                   0                   0                   0

  Columns 21 through 25

                   0                   0                   0                   0                   0

  Columns 26 through 30

                   0                   0                   0                   0                   0

  Columns 31 through 35

                   0                   0                   0                   0                   0

  Columns 36 through 40

                   0                   0                   0                   0                   0

  Columns 41 through 45

                   0                   0                   0                   0                   0

  Columns 46 through 50

                   0                   0                   0                   0                   0

  Columns 51 through 55

                   0                   0                   0                   0                   0

  Columns 56 through 60

                   0                   0                   0                   0                   0

  Column 61

                   0


outer_code_BER =

  Columns 1 through 5

   0.432228119530796                   0                   0                   0                   0

  Columns 6 through 10

                   0                   0                   0                   0                   0

  Columns 11 through 15

                   0                   0                   0                   0                   0

  Columns 16 through 20

                   0                   0                   0                   0                   0

  Columns 21 through 25

                   0                   0                   0                   0                   0

  Columns 26 through 30

                   0                   0                   0                   0                   0

  Columns 31 through 35

                   0                   0                   0                   0                   0

  Columns 36 through 40

                   0                   0                   0                   0                   0

  Columns 41 through 45

                   0                   0                   0                   0                   0

  Columns 46 through 50

                   0                   0                   0                   0                   0

  Columns 51 through 55

                   0                   0                   0                   0                   0

  Columns 56 through 60

                   0                   0                   0                   0                   0

  Column 61

                   0


inner_code_BER =

  Columns 1 through 5

   0.432228119530795   0.427892439086941                   0                   0                   0

  Columns 6 through 10

                   0                   0                   0                   0                   0

  Columns 11 through 15

                   0                   0                   0                   0                   0

  Columns 16 through 20

                   0                   0                   0                   0                   0

  Columns 21 through 25

                   0                   0                   0                   0                   0

  Columns 26 through 30

                   0                   0                   0                   0                   0

  Columns 31 through 35

                   0                   0                   0                   0                   0

  Columns 36 through 40

                   0                   0                   0                   0                   0

  Columns 41 through 45

                   0                   0                   0                   0                   0

  Columns 46 through 50

                   0                   0                   0                   0                   0

  Columns 51 through 55

                   0                   0                   0                   0                   0

  Columns 56 through 60

                   0                   0                   0                   0                   0

  Column 61

                   0


outer_code_BER =

  Columns 1 through 5

   0.432228119530796   0.427892439086941                   0                   0                   0

  Columns 6 through 10

                   0                   0                   0                   0                   0

  Columns 11 through 15

                   0                   0                   0                   0                   0

  Columns 16 through 20

                   0                   0                   0                   0                   0

  Columns 21 through 25

                   0                   0                   0                   0                   0

  Columns 26 through 30

                   0                   0                   0                   0                   0

  Columns 31 through 35

                   0                   0                   0                   0                   0

  Columns 36 through 40

                   0                   0                   0                   0                   0

  Columns 41 through 45

                   0                   0                   0                   0                   0

  Columns 46 through 50

                   0                   0                   0                   0                   0

  Columns 51 through 55

                   0                   0                   0                   0                   0

  Columns 56 through 60

                   0                   0                   0                   0                   0

  Column 61

                   0


inner_code_BER =

  Columns 1 through 5

   0.432228119530795   0.427892439086941   0.423063345443881                   0                   0

  Columns 6 through 10

                   0                   0                   0                   0                   0

  Columns 11 through 15

                   0                   0                   0                   0                   0

  Columns 16 through 20

                   0                   0                   0                   0                   0

  Columns 21 through 25

                   0                   0                   0                   0                   0

  Columns 26 through 30

                   0                   0                   0                   0                   0

  Columns 31 through 35

                   0                   0                   0                   0                   0

  Columns 36 through 40

                   0                   0                   0                   0                   0

  Columns 41 through 45

                   0                   0                   0                   0                   0

  Columns 46 through 50

                   0                   0                   0                   0                   0

  Columns 51 through 55

                   0                   0                   0                   0                   0

  Columns 56 through 60

                   0                   0                   0                   0                   0

  Column 61

                   0


outer_code_BER =

  Columns 1 through 5

   0.432228119530796   0.427892439086941   0.423063345443880                   0                   0

  Columns 6 through 10

                   0                   0                   0                   0                   0

  Columns 11 through 15

                   0                   0                   0                   0                   0

  Columns 16 through 20

                   0                   0                   0                   0                   0

  Columns 21 through 25

                   0                   0                   0                   0                   0

  Columns 26 through 30

                   0                   0                   0                   0                   0

  Columns 31 through 35

                   0                   0                   0                   0                   0

  Columns 36 through 40

                   0                   0                   0                   0                   0

  Columns 41 through 45

                   0                   0                   0                   0                   0

  Columns 46 through 50

                   0                   0                   0                   0                   0

  Columns 51 through 55

                   0                   0                   0                   0                   0

  Columns 56 through 60

                   0                   0                   0                   0                   0

  Column 61

                   0


inner_code_BER =

  Columns 1 through 5

   0.432228119530795   0.427892439086941   0.423063345443881   0.417639170565289                   0

  Columns 6 through 10

                   0                   0                   0                   0                   0

  Columns 11 through 15

                   0                   0                   0                   0                   0

  Columns 16 through 20

                   0                   0                   0                   0                   0

  Columns 21 through 25

                   0                   0                   0                   0                   0

  Columns 26 through 30

                   0                   0                   0                   0                   0

  Columns 31 through 35

                   0                   0                   0                   0                   0

  Columns 36 through 40

                   0                   0                   0                   0                   0

  Columns 41 through 45

                   0                   0                   0                   0                   0

  Columns 46 through 50

                   0                   0                   0                   0                   0

  Columns 51 through 55

                   0                   0                   0                   0                   0

  Columns 56 through 60

                   0                   0                   0                   0                   0

  Column 61

                   0


outer_code_BER =

  Columns 1 through 5

   0.432228119530796   0.427892439086941   0.423063345443880   0.417639170565290                   0

  Columns 6 through 10

                   0                   0                   0                   0                   0

  Columns 11 through 15

                   0                   0                   0                   0                   0

  Columns 16 through 20

                   0                   0                   0                   0                   0

  Columns 21 through 25

                   0                   0                   0                   0                   0

  Columns 26 through 30

                   0                   0                   0                   0                   0

  Columns 31 through 35

                   0                   0                   0                   0                   0

  Columns 36 through 40

                   0                   0                   0                   0                   0

  Columns 41 through 45

                   0                   0                   0                   0                   0

  Columns 46 through 50

                   0                   0                   0                   0                   0

  Columns 51 through 55

                   0                   0                   0                   0                   0

  Columns 56 through 60

                   0                   0                   0                   0                   0

  Column 61

                   0


inner_code_BER =

  Columns 1 through 5

   0.432228119530795   0.427892439086941   0.423063345443881   0.417639170565289   0.411484513831639

  Columns 6 through 10

                   0                   0                   0                   0                   0

  Columns 11 through 15

                   0                   0                   0                   0                   0

  Columns 16 through 20

                   0                   0                   0                   0                   0

  Columns 21 through 25

                   0                   0                   0                   0                   0

  Columns 26 through 30

                   0                   0                   0                   0                   0

  Columns 31 through 35

                   0                   0                   0                   0                   0

  Columns 36 through 40

                   0                   0                   0                   0                   0

  Columns 41 through 45

                   0                   0                   0                   0                   0

  Columns 46 through 50

                   0                   0                   0                   0                   0

  Columns 51 through 55

                   0                   0                   0                   0                   0

  Columns 56 through 60

                   0                   0                   0                   0                   0

  Column 61

                   0


outer_code_BER =

  Columns 1 through 5

   0.432228119530796   0.427892439086941   0.423063345443880   0.417639170565290   0.411484513831639

  Columns 6 through 10

                   0                   0                   0                   0                   0

  Columns 11 through 15

                   0                   0                   0                   0                   0

  Columns 16 through 20

                   0                   0                   0                   0                   0

  Columns 21 through 25

                   0                   0                   0                   0                   0

  Columns 26 through 30

                   0                   0                   0                   0                   0

  Columns 31 through 35

                   0                   0                   0                   0                   0

  Columns 36 through 40

                   0                   0                   0                   0                   0

  Columns 41 through 45

                   0                   0                   0                   0                   0

  Columns 46 through 50

                   0                   0                   0                   0                   0

  Columns 51 through 55

                   0                   0                   0                   0                   0

  Columns 56 through 60

                   0                   0                   0                   0                   0

  Column 61

                   0


inner_code_BER =

  Columns 1 through 5

   0.432228119530795   0.427892439086941   0.423063345443881   0.417639170565289   0.411484513831639

  Columns 6 through 10

   0.404414062734854                   0                   0                   0                   0

  Columns 11 through 15

                   0                   0                   0                   0                   0

  Columns 16 through 20

                   0                   0                   0                   0                   0

  Columns 21 through 25

                   0                   0                   0                   0                   0

  Columns 26 through 30

                   0                   0                   0                   0                   0

  Columns 31 through 35

                   0                   0                   0                   0                   0

  Columns 36 through 40

                   0                   0                   0                   0                   0

  Columns 41 through 45

                   0                   0                   0                   0                   0

  Columns 46 through 50

                   0                   0                   0                   0                   0

  Columns 51 through 55

                   0                   0                   0                   0                   0

  Columns 56 through 60

                   0                   0                   0                   0                   0

  Column 61

                   0


outer_code_BER =

  Columns 1 through 5

   0.432228119530796   0.427892439086941   0.423063345443880   0.417639170565290   0.411484513831639

  Columns 6 through 10

   0.404414062734854                   0                   0                   0                   0

  Columns 11 through 15

                   0                   0                   0                   0                   0

  Columns 16 through 20

                   0                   0                   0                   0                   0

  Columns 21 through 25

                   0                   0                   0                   0                   0

  Columns 26 through 30

                   0                   0                   0                   0                   0

  Columns 31 through 35

                   0                   0                   0                   0                   0

  Columns 36 through 40

                   0                   0                   0                   0                   0

  Columns 41 through 45

                   0                   0                   0                   0                   0

  Columns 46 through 50

                   0                   0                   0                   0                   0

  Columns 51 through 55

                   0                   0                   0                   0                   0

  Columns 56 through 60

                   0                   0                   0                   0                   0

  Column 61

                   0


inner_code_BER =

  Columns 1 through 5

   0.432228119530795   0.427892439086941   0.423063345443881   0.417639170565289   0.411484513831639

  Columns 6 through 10

   0.404414062734854   0.396165589463048                   0                   0                   0

  Columns 11 through 15

                   0                   0                   0                   0                   0

  Columns 16 through 20

                   0                   0                   0                   0                   0

  Columns 21 through 25

                   0                   0                   0                   0                   0

  Columns 26 through 30

                   0                   0                   0                   0                   0

  Columns 31 through 35

                   0                   0                   0                   0                   0

  Columns 36 through 40

                   0                   0                   0                   0                   0

  Columns 41 through 45

                   0                   0                   0                   0                   0

  Columns 46 through 50

                   0                   0                   0                   0                   0

  Columns 51 through 55

                   0                   0                   0                   0                   0

  Columns 56 through 60

                   0                   0                   0                   0                   0

  Column 61

                   0


outer_code_BER =

  Columns 1 through 5

   0.432228119530796   0.427892439086941   0.423063345443880   0.417639170565290   0.411484513831639

  Columns 6 through 10

   0.404414062734854   0.396165589463048                   0                   0                   0

  Columns 11 through 15

                   0                   0                   0                   0                   0

  Columns 16 through 20

                   0                   0                   0                   0                   0

  Columns 21 through 25

                   0                   0                   0                   0                   0

  Columns 26 through 30

                   0                   0                   0                   0                   0

  Columns 31 through 35

                   0                   0                   0                   0                   0

  Columns 36 through 40

                   0                   0                   0                   0                   0

  Columns 41 through 45

                   0                   0                   0                   0                   0

  Columns 46 through 50

                   0                   0                   0                   0                   0

  Columns 51 through 55

                   0                   0                   0                   0                   0

  Columns 56 through 60

                   0                   0                   0                   0                   0

  Column 61

                   0


inner_code_BER =

  Columns 1 through 5

   0.432228119530795   0.427892439086941   0.423063345443881   0.417639170565289   0.411484513831639

  Columns 6 through 10

   0.404414062734854   0.396165589463048   0.386352217005017                   0                   0

  Columns 11 through 15

                   0                   0                   0                   0                   0

  Columns 16 through 20

                   0                   0                   0                   0                   0

  Columns 21 through 25

                   0                   0                   0                   0                   0

  Columns 26 through 30

                   0                   0                   0                   0                   0

  Columns 31 through 35

                   0                   0                   0                   0                   0

  Columns 36 through 40

                   0                   0                   0                   0                   0

  Columns 41 through 45

                   0                   0                   0                   0                   0

  Columns 46 through 50

                   0                   0                   0                   0                   0

  Columns 51 through 55

                   0                   0                   0                   0                   0

  Columns 56 through 60

                   0                   0                   0                   0                   0

  Column 61

                   0


outer_code_BER =

  Columns 1 through 5

   0.432228119530796   0.427892439086941   0.423063345443880   0.417639170565290   0.411484513831639

  Columns 6 through 10

   0.404414062734854   0.396165589463048   0.386352217005019                   0                   0

  Columns 11 through 15

                   0                   0                   0                   0                   0

  Columns 16 through 20

                   0                   0                   0                   0                   0

  Columns 21 through 25

                   0                   0                   0                   0                   0

  Columns 26 through 30

                   0                   0                   0                   0                   0

  Columns 31 through 35

                   0                   0                   0                   0                   0

  Columns 36 through 40

                   0                   0                   0                   0                   0

  Columns 41 through 45

                   0                   0                   0                   0                   0

  Columns 46 through 50

                   0                   0                   0                   0                   0

  Columns 51 through 55

                   0                   0                   0                   0                   0

  Columns 56 through 60

                   0                   0                   0                   0                   0

  Column 61

                   0


inner_code_BER =

  Columns 1 through 5

   0.432228119530795   0.427892439086941   0.423063345443881   0.417639170565289   0.411484513831639

  Columns 6 through 10

   0.404414062734854   0.396165589463048   0.386352217005017   0.374371067284993                   0

  Columns 11 through 15

                   0                   0                   0                   0                   0

  Columns 16 through 20

                   0                   0                   0                   0                   0

  Columns 21 through 25

                   0                   0                   0                   0                   0

  Columns 26 through 30

                   0                   0                   0                   0                   0

  Columns 31 through 35

                   0                   0                   0                   0                   0

  Columns 36 through 40

                   0                   0                   0                   0                   0

  Columns 41 through 45

                   0                   0                   0                   0                   0

  Columns 46 through 50

                   0                   0                   0                   0                   0

  Columns 51 through 55

                   0                   0                   0                   0                   0

  Columns 56 through 60

                   0                   0                   0                   0                   0

  Column 61

                   0


outer_code_BER =

  Columns 1 through 5

   0.432228119530796   0.427892439086941   0.423063345443880   0.417639170565290   0.411484513831639

  Columns 6 through 10

   0.404414062734854   0.396165589463048   0.386352217005019   0.374371067284993                   0

  Columns 11 through 15

                   0                   0                   0                   0                   0

  Columns 16 through 20

                   0                   0                   0                   0                   0

  Columns 21 through 25

                   0                   0                   0                   0                   0

  Columns 26 through 30

                   0                   0                   0                   0                   0

  Columns 31 through 35

                   0                   0                   0                   0                   0

  Columns 36 through 40

                   0                   0                   0                   0                   0

  Columns 41 through 45

                   0                   0                   0                   0                   0

  Columns 46 through 50

                   0                   0                   0                   0                   0

  Columns 51 through 55

                   0                   0                   0                   0                   0

  Columns 56 through 60

                   0                   0                   0                   0                   0

  Column 61

                   0


inner_code_BER =

  Columns 1 through 5

   0.432228119530795   0.427892439086941   0.423063345443881   0.417639170565289   0.411484513831639

  Columns 6 through 10

   0.404414062734854   0.396165589463048   0.386352217005017   0.374371067284993   0.359208823654880

  Columns 11 through 15

                   0                   0                   0                   0                   0

  Columns 16 through 20

                   0                   0                   0                   0                   0

  Columns 21 through 25

                   0                   0                   0                   0                   0

  Columns 26 through 30

                   0                   0                   0                   0                   0

  Columns 31 through 35

                   0                   0                   0                   0                   0

  Columns 36 through 40

                   0                   0                   0                   0                   0

  Columns 41 through 45

                   0                   0                   0                   0                   0

  Columns 46 through 50

                   0                   0                   0                   0                   0

  Columns 51 through 55

                   0                   0                   0                   0                   0

  Columns 56 through 60

                   0                   0                   0                   0                   0

  Column 61

                   0


outer_code_BER =

  Columns 1 through 5

   0.432228119530796   0.427892439086941   0.423063345443880   0.417639170565290   0.411484513831639

  Columns 6 through 10

   0.404414062734854   0.396165589463048   0.386352217005019   0.374371067284993   0.359208823654879

  Columns 11 through 15

                   0                   0                   0                   0                   0

  Columns 16 through 20

                   0                   0                   0                   0                   0

  Columns 21 through 25

                   0                   0                   0                   0                   0

  Columns 26 through 30

                   0                   0                   0                   0                   0

  Columns 31 through 35

                   0                   0                   0                   0                   0

  Columns 36 through 40

                   0                   0                   0                   0                   0

  Columns 41 through 45

                   0                   0                   0                   0                   0

  Columns 46 through 50

                   0                   0                   0                   0                   0

  Columns 51 through 55

                   0                   0                   0                   0                   0

  Columns 56 through 60

                   0                   0                   0                   0                   0

  Column 61

                   0


inner_code_BER =

  Columns 1 through 5

   0.432228119530795   0.427892439086941   0.423063345443881   0.417639170565289   0.411484513831639

  Columns 6 through 10

   0.404414062734854   0.396165589463048   0.386352217005017   0.374371067284993   0.359208823654880

  Columns 11 through 15

   0.338957885705395                   0                   0                   0                   0

  Columns 16 through 20

                   0                   0                   0                   0                   0

  Columns 21 through 25

                   0                   0                   0                   0                   0

  Columns 26 through 30

                   0                   0                   0                   0                   0

  Columns 31 through 35

                   0                   0                   0                   0                   0

  Columns 36 through 40

                   0                   0                   0                   0                   0

  Columns 41 through 45

                   0                   0                   0                   0                   0

  Columns 46 through 50

                   0                   0                   0                   0                   0

  Columns 51 through 55

                   0                   0                   0                   0                   0

  Columns 56 through 60

                   0                   0                   0                   0                   0

  Column 61

                   0


outer_code_BER =

  Columns 1 through 5

   0.432228119530796   0.427892439086941   0.423063345443880   0.417639170565290   0.411484513831639

  Columns 6 through 10

   0.404414062734854   0.396165589463048   0.386352217005019   0.374371067284993   0.359208823654879

  Columns 11 through 15

   0.338957885705395                   0                   0                   0                   0

  Columns 16 through 20

                   0                   0                   0                   0                   0

  Columns 21 through 25

                   0                   0                   0                   0                   0

  Columns 26 through 30

                   0                   0                   0                   0                   0

  Columns 31 through 35

                   0                   0                   0                   0                   0

  Columns 36 through 40

                   0                   0                   0                   0                   0

  Columns 41 through 45

                   0                   0                   0                   0                   0

  Columns 46 through 50

                   0                   0                   0                   0                   0

  Columns 51 through 55

                   0                   0                   0                   0                   0

  Columns 56 through 60

                   0                   0                   0                   0                   0

  Column 61

                   0


inner_code_BER =

  Columns 1 through 5

   0.432228119530795   0.427892439086941   0.423063345443881   0.417639170565289   0.411484513831639

  Columns 6 through 10

   0.404414062734854   0.396165589463048   0.386352217005017   0.374371067284993   0.359208823654880

  Columns 11 through 15

   0.338957885705395   0.309292452373044                   0                   0                   0

  Columns 16 through 20

                   0                   0                   0                   0                   0

  Columns 21 through 25

                   0                   0                   0                   0                   0

  Columns 26 through 30

                   0                   0                   0                   0                   0

  Columns 31 through 35

                   0                   0                   0                   0                   0

  Columns 36 through 40

                   0                   0                   0                   0                   0

  Columns 41 through 45

                   0                   0                   0                   0                   0

  Columns 46 through 50

                   0                   0                   0                   0                   0

  Columns 51 through 55

                   0                   0                   0                   0                   0

  Columns 56 through 60

                   0                   0                   0                   0                   0

  Column 61

                   0


outer_code_BER =

  Columns 1 through 5

   0.432228119530796   0.427892439086941   0.423063345443880   0.417639170565290   0.411484513831639

  Columns 6 through 10

   0.404414062734854   0.396165589463048   0.386352217005019   0.374371067284993   0.359208823654879

  Columns 11 through 15

   0.338957885705395   0.309292452373044                   0                   0                   0

  Columns 16 through 20

                   0                   0                   0                   0                   0

  Columns 21 through 25

                   0                   0                   0                   0                   0

  Columns 26 through 30

                   0                   0                   0                   0                   0

  Columns 31 through 35

                   0                   0                   0                   0                   0

  Columns 36 through 40

                   0                   0                   0                   0                   0

  Columns 41 through 45

                   0                   0                   0                   0                   0

  Columns 46 through 50

                   0                   0                   0                   0                   0

  Columns 51 through 55

                   0                   0                   0                   0                   0

  Columns 56 through 60

                   0                   0                   0                   0                   0

  Column 61

                   0


inner_code_BER =

  Columns 1 through 5

   0.432228119530795   0.427892439086941   0.423063345443881   0.417639170565289   0.411484513831639

  Columns 6 through 10

   0.404414062734854   0.396165589463048   0.386352217005017   0.374371067284993   0.359208823654880

  Columns 11 through 15

   0.338957885705395   0.309292452373044   0.256880774514599                   0                   0

  Columns 16 through 20

                   0                   0                   0                   0                   0

  Columns 21 through 25

                   0                   0                   0                   0                   0

  Columns 26 through 30

                   0                   0                   0                   0                   0

  Columns 31 through 35

                   0                   0                   0                   0                   0

  Columns 36 through 40

                   0                   0                   0                   0                   0

  Columns 41 through 45

                   0                   0                   0                   0                   0

  Columns 46 through 50

                   0                   0                   0                   0                   0

  Columns 51 through 55

                   0                   0                   0                   0                   0

  Columns 56 through 60

                   0                   0                   0                   0                   0

  Column 61

                   0


outer_code_BER =

  Columns 1 through 5

   0.432228119530796   0.427892439086941   0.423063345443880   0.417639170565290   0.411484513831639

  Columns 6 through 10

   0.404414062734854   0.396165589463048   0.386352217005019   0.374371067284993   0.359208823654879

  Columns 11 through 15

   0.338957885705395   0.309292452373044   0.256880774514600                   0                   0

  Columns 16 through 20

                   0                   0                   0                   0                   0

  Columns 21 through 25

                   0                   0                   0                   0                   0

  Columns 26 through 30

                   0                   0                   0                   0                   0

  Columns 31 through 35

                   0                   0                   0                   0                   0

  Columns 36 through 40

                   0                   0                   0                   0                   0

  Columns 41 through 45

                   0                   0                   0                   0                   0

  Columns 46 through 50

                   0                   0                   0                   0                   0

  Columns 51 through 55

                   0                   0                   0                   0                   0

  Columns 56 through 60

                   0                   0                   0                   0                   0

  Column 61

                   0


inner_code_BER =

  Columns 1 through 5

   0.432228119530795   0.427892439086941   0.423063345443881   0.417639170565289   0.411484513831639

  Columns 6 through 10

   0.404414062734854   0.396165589463048   0.386352217005017   0.374371067284993   0.359208823654880

  Columns 11 through 15

   0.338957885705395   0.309292452373044   0.256880774514599   0.143070975843611                   0

  Columns 16 through 20

                   0                   0                   0                   0                   0

  Columns 21 through 25

                   0                   0                   0                   0                   0

  Columns 26 through 30

                   0                   0                   0                   0                   0

  Columns 31 through 35

                   0                   0                   0                   0                   0

  Columns 36 through 40

                   0                   0                   0                   0                   0

  Columns 41 through 45

                   0                   0                   0                   0                   0

  Columns 46 through 50

                   0                   0                   0                   0                   0

  Columns 51 through 55

                   0                   0                   0                   0                   0

  Columns 56 through 60

                   0                   0                   0                   0                   0

  Column 61

                   0


outer_code_BER =

  Columns 1 through 5

   0.432228119530796   0.427892439086941   0.423063345443880   0.417639170565290   0.411484513831639

  Columns 6 through 10

   0.404414062734854   0.396165589463048   0.386352217005019   0.374371067284993   0.359208823654879

  Columns 11 through 15

   0.338957885705395   0.309292452373044   0.256880774514600   0.143070975843611                   0

  Columns 16 through 20

                   0                   0                   0                   0                   0

  Columns 21 through 25

                   0                   0                   0                   0                   0

  Columns 26 through 30

                   0                   0                   0                   0                   0

  Columns 31 through 35

                   0                   0                   0                   0                   0

  Columns 36 through 40

                   0                   0                   0                   0                   0

  Columns 41 through 45

                   0                   0                   0                   0                   0

  Columns 46 through 50

                   0                   0                   0                   0                   0

  Columns 51 through 55

                   0                   0                   0                   0                   0

  Columns 56 through 60

                   0                   0                   0                   0                   0

  Column 61

                   0


inner_code_BER =

  Columns 1 through 5

   0.432228119530795   0.427892439086941   0.423063345443881   0.417639170565289   0.411484513831639

  Columns 6 through 10

   0.404414062734854   0.396165589463048   0.386352217005017   0.374371067284993   0.359208823654880

  Columns 11 through 15

   0.338957885705395   0.309292452373044   0.256880774514599   0.143070975843611   0.003131094718894

  Columns 16 through 20

                   0                   0                   0                   0                   0

  Columns 21 through 25

                   0                   0                   0                   0                   0

  Columns 26 through 30

                   0                   0                   0                   0                   0

  Columns 31 through 35

                   0                   0                   0                   0                   0

  Columns 36 through 40

                   0                   0                   0                   0                   0

  Columns 41 through 45

                   0                   0                   0                   0                   0

  Columns 46 through 50

                   0                   0                   0                   0                   0

  Columns 51 through 55

                   0                   0                   0                   0                   0

  Columns 56 through 60

                   0                   0                   0                   0                   0

  Column 61

                   0


outer_code_BER =

  Columns 1 through 5

   0.432228119530796   0.427892439086941   0.423063345443880   0.417639170565290   0.411484513831639

  Columns 6 through 10

   0.404414062734854   0.396165589463048   0.386352217005019   0.374371067284993   0.359208823654879

  Columns 11 through 15

   0.338957885705395   0.309292452373044   0.256880774514600   0.143070975843611   0.000000021697117

  Columns 16 through 20

                   0                   0                   0                   0                   0

  Columns 21 through 25

                   0                   0                   0                   0                   0

  Columns 26 through 30

                   0                   0                   0                   0                   0

  Columns 31 through 35

                   0                   0                   0                   0                   0

  Columns 36 through 40

                   0                   0                   0                   0                   0

  Columns 41 through 45

                   0                   0                   0                   0                   0

  Columns 46 through 50

                   0                   0                   0                   0                   0

  Columns 51 through 55

                   0                   0                   0                   0                   0

  Columns 56 through 60

                   0                   0                   0                   0                   0

  Column 61

                   0

µ±Ç°ÍâÂëÎóÂëÂÊÒÑµÍÓÚÄ¿±êÎóÂëÂÊ£¬ÐÅÔë±ÈÎª1.40 dB

inner_code_BER =

  Columns 1 through 5

   0.432228119530795   0.427892439086941   0.423063345443881   0.417639170565289   0.411484513831639

  Columns 6 through 10

   0.404414062734854   0.396165589463048   0.386352217005017   0.374371067284993   0.359208823654880

  Columns 11 through 15

   0.338957885705395   0.309292452373044   0.256880774514599   0.143070975843611   0.003131094718894

  Columns 16 through 20

   0.002655633940905                   0                   0                   0                   0

  Columns 21 through 25

                   0                   0                   0                   0                   0

  Columns 26 through 30

                   0                   0                   0                   0                   0

  Columns 31 through 35

                   0                   0                   0                   0                   0

  Columns 36 through 40

                   0                   0                   0                   0                   0

  Columns 41 through 45

                   0                   0                   0                   0                   0

  Columns 46 through 50

                   0                   0                   0                   0                   0

  Columns 51 through 55

                   0                   0                   0                   0                   0

  Columns 56 through 60

                   0                   0                   0                   0                   0

  Column 61

                   0


inner_code_BER =

  Columns 1 through 5

   0.432228119530795   0.427892439086941   0.423063345443881   0.417639170565289   0.411484513831639

  Columns 6 through 10

   0.404414062734854   0.396165589463048   0.386352217005017   0.374371067284993   0.359208823654880

  Columns 11 through 15

   0.338957885705395   0.309292452373044   0.256880774514599   0.143070975843611   0.003131094718894

  Columns 16 through 20

   0.002655633940905   0.002294811620057                   0                   0                   0

  Columns 21 through 25

                   0                   0                   0                   0                   0

  Columns 26 through 30

                   0                   0                   0                   0                   0

  Columns 31 through 35

                   0                   0                   0                   0                   0

  Columns 36 through 40

                   0                   0                   0                   0                   0

  Columns 41 through 45

                   0                   0                   0                   0                   0

  Columns 46 through 50

                   0                   0                   0                   0                   0

  Columns 51 through 55

                   0                   0                   0                   0                   0

  Columns 56 through 60

                   0                   0                   0                   0                   0

  Column 61

                   0


inner_code_BER =

  Columns 1 through 5

   0.432228119530795   0.427892439086941   0.423063345443881   0.417639170565289   0.411484513831639

  Columns 6 through 10

   0.404414062734854   0.396165589463048   0.386352217005017   0.374371067284993   0.359208823654880

  Columns 11 through 15

   0.338957885705395   0.309292452373044   0.256880774514599   0.143070975843611   0.003131094718894

  Columns 16 through 20

   0.002655633940905   0.002294811620057   0.002008156687988                   0                   0

  Columns 21 through 25

                   0                   0                   0                   0                   0

  Columns 26 through 30

                   0                   0                   0                   0                   0

  Columns 31 through 35

                   0                   0                   0                   0                   0

  Columns 36 through 40

                   0                   0                   0                   0                   0

  Columns 41 through 45

                   0                   0                   0                   0                   0

  Columns 46 through 50

                   0                   0                   0                   0                   0

  Columns 51 through 55

                   0                   0                   0                   0                   0

  Columns 56 through 60

                   0                   0                   0                   0                   0

  Column 61

                   0


inner_code_BER =

  Columns 1 through 5

   0.432228119530795   0.427892439086941   0.423063345443881   0.417639170565289   0.411484513831639

  Columns 6 through 10

   0.404414062734854   0.396165589463048   0.386352217005017   0.374371067284993   0.359208823654880

  Columns 11 through 15

   0.338957885705395   0.309292452373044   0.256880774514599   0.143070975843611   0.003131094718894

  Columns 16 through 20

   0.002655633940905   0.002294811620057   0.002008156687988   0.001773542791940                   0

  Columns 21 through 25

                   0                   0                   0                   0                   0

  Columns 26 through 30

                   0                   0                   0                   0                   0

  Columns 31 through 35

                   0                   0                   0                   0                   0

  Columns 36 through 40

                   0                   0                   0                   0                   0

  Columns 41 through 45

                   0                   0                   0                   0                   0

  Columns 46 through 50

                   0                   0                   0                   0                   0

  Columns 51 through 55

                   0                   0                   0                   0                   0

  Columns 56 through 60

                   0                   0                   0                   0                   0

  Column 61

                   0


inner_code_BER =

  Columns 1 through 5

   0.432228119530795   0.427892439086941   0.423063345443881   0.417639170565289   0.411484513831639

  Columns 6 through 10

   0.404414062734854   0.396165589463048   0.386352217005017   0.374371067284993   0.359208823654880

  Columns 11 through 15

   0.338957885705395   0.309292452373044   0.256880774514599   0.143070975843611   0.003131094718894

  Columns 16 through 20

   0.002655633940905   0.002294811620057   0.002008156687988   0.001773542791940   0.001577434410459

  Columns 21 through 25

                   0                   0                   0                   0                   0

  Columns 26 through 30

                   0                   0                   0                   0                   0

  Columns 31 through 35

                   0                   0                   0                   0                   0

  Columns 36 through 40

                   0                   0                   0                   0                   0

  Columns 41 through 45

                   0                   0                   0                   0                   0

  Columns 46 through 50

                   0                   0                   0                   0                   0

  Columns 51 through 55

                   0                   0                   0                   0                   0

  Columns 56 through 60

                   0                   0                   0                   0                   0

  Column 61

                   0


inner_code_BER =

  Columns 1 through 5

   0.432228119530795   0.427892439086941   0.423063345443881   0.417639170565289   0.411484513831639

  Columns 6 through 10

   0.404414062734854   0.396165589463048   0.386352217005017   0.374371067284993   0.359208823654880

  Columns 11 through 15

   0.338957885705395   0.309292452373044   0.256880774514599   0.143070975843611   0.003131094718894

  Columns 16 through 20

   0.002655633940905   0.002294811620057   0.002008156687988   0.001773542791940   0.001577434410459

  Columns 21 through 25

   0.001410915630254                   0                   0                   0                   0

  Columns 26 through 30

                   0                   0                   0                   0                   0

  Columns 31 through 35

                   0                   0                   0                   0                   0

  Columns 36 through 40

                   0                   0                   0                   0                   0

  Columns 41 through 45

                   0                   0                   0                   0                   0

  Columns 46 through 50

                   0                   0                   0                   0                   0

  Columns 51 through 55

                   0                   0                   0                   0                   0

  Columns 56 through 60

                   0                   0                   0                   0                   0

  Column 61

                   0


inner_code_BER =

  Columns 1 through 5

   0.432228119530795   0.427892439086941   0.423063345443881   0.417639170565289   0.411484513831639

  Columns 6 through 10

   0.404414062734854   0.396165589463048   0.386352217005017   0.374371067284993   0.359208823654880

  Columns 11 through 15

   0.338957885705395   0.309292452373044   0.256880774514599   0.143070975843611   0.003131094718894

  Columns 16 through 20

   0.002655633940905   0.002294811620057   0.002008156687988   0.001773542791940   0.001577434410459

  Columns 21 through 25

   0.001410915630254   0.001267789751867                   0                   0                   0

  Columns 26 through 30

                   0                   0                   0                   0                   0

  Columns 31 through 35

                   0                   0                   0                   0                   0

  Columns 36 through 40

                   0                   0                   0                   0                   0

  Columns 41 through 45

                   0                   0                   0                   0                   0

  Columns 46 through 50

                   0                   0                   0                   0                   0

  Columns 51 through 55

                   0                   0                   0                   0                   0

  Columns 56 through 60

                   0                   0                   0                   0                   0

  Column 61

                   0


inner_code_BER =

  Columns 1 through 5

   0.432228119530795   0.427892439086941   0.423063345443881   0.417639170565289   0.411484513831639

  Columns 6 through 10

   0.404414062734854   0.396165589463048   0.386352217005017   0.374371067284993   0.359208823654880

  Columns 11 through 15

   0.338957885705395   0.309292452373044   0.256880774514599   0.143070975843611   0.003131094718894

  Columns 16 through 20

   0.002655633940905   0.002294811620057   0.002008156687988   0.001773542791940   0.001577434410459

  Columns 21 through 25

   0.001410915630254   0.001267789751867   0.001143577471768                   0                   0

  Columns 26 through 30

                   0                   0                   0                   0                   0

  Columns 31 through 35

                   0                   0                   0                   0                   0

  Columns 36 through 40

                   0                   0                   0                   0                   0

  Columns 41 through 45

                   0                   0                   0                   0                   0

  Columns 46 through 50

                   0                   0                   0                   0                   0

  Columns 51 through 55

                   0                   0                   0                   0                   0

  Columns 56 through 60

                   0                   0                   0                   0                   0

  Column 61

                   0


inner_code_BER =

  Columns 1 through 5

   0.432228119530795   0.427892439086941   0.423063345443881   0.417639170565289   0.411484513831639

  Columns 6 through 10

   0.404414062734854   0.396165589463048   0.386352217005017   0.374371067284993   0.359208823654880

  Columns 11 through 15

   0.338957885705395   0.309292452373044   0.256880774514599   0.143070975843611   0.003131094718894

  Columns 16 through 20

   0.002655633940905   0.002294811620057   0.002008156687988   0.001773542791940   0.001577434410459

  Columns 21 through 25

   0.001410915630254   0.001267789751867   0.001143577471768   0.001034922383383                   0

  Columns 26 through 30

                   0                   0                   0                   0                   0

  Columns 31 through 35

                   0                   0                   0                   0                   0

  Columns 36 through 40

                   0                   0                   0                   0                   0

  Columns 41 through 45

                   0                   0                   0                   0                   0

  Columns 46 through 50

                   0                   0                   0                   0                   0

  Columns 51 through 55

                   0                   0                   0                   0                   0

  Columns 56 through 60

                   0                   0                   0                   0                   0

  Column 61

                   0


inner_code_BER =

  Columns 1 through 5

   0.432228119530795   0.427892439086941   0.423063345443881   0.417639170565289   0.411484513831639

  Columns 6 through 10

   0.404414062734854   0.396165589463048   0.386352217005017   0.374371067284993   0.359208823654880

  Columns 11 through 15

   0.338957885705395   0.309292452373044   0.256880774514599   0.143070975843611   0.003131094718894

  Columns 16 through 20

   0.002655633940905   0.002294811620057   0.002008156687988   0.001773542791940   0.001577434410459

  Columns 21 through 25

   0.001410915630254   0.001267789751867   0.001143577471768   0.001034922383383   0.000939250006730

  Columns 26 through 30

                   0                   0                   0                   0                   0

  Columns 31 through 35

                   0                   0                   0                   0                   0

  Columns 36 through 40

                   0                   0                   0                   0                   0

  Columns 41 through 45

                   0                   0                   0                   0                   0

  Columns 46 through 50

                   0                   0                   0                   0                   0

  Columns 51 through 55

                   0                   0                   0                   0                   0

  Columns 56 through 60

                   0                   0                   0                   0                   0

  Column 61

                   0


inner_code_BER =

  Columns 1 through 5

   0.432228119530795   0.427892439086941   0.423063345443881   0.417639170565289   0.411484513831639

  Columns 6 through 10

   0.404414062734854   0.396165589463048   0.386352217005017   0.374371067284993   0.359208823654880

  Columns 11 through 15

   0.338957885705395   0.309292452373044   0.256880774514599   0.143070975843611   0.003131094718894

  Columns 16 through 20

   0.002655633940905   0.002294811620057   0.002008156687988   0.001773542791940   0.001577434410459

  Columns 21 through 25

   0.001410915630254   0.001267789751867   0.001143577471768   0.001034922383383   0.000939250006730

  Columns 26 through 30

   0.000854543383135                   0                   0                   0                   0

  Columns 31 through 35

                   0                   0                   0                   0                   0

  Columns 36 through 40

                   0                   0                   0                   0                   0

  Columns 41 through 45

                   0                   0                   0                   0                   0

  Columns 46 through 50

                   0                   0                   0                   0                   0

  Columns 51 through 55

                   0                   0                   0                   0                   0

  Columns 56 through 60

                   0                   0                   0                   0                   0

  Column 61

                   0


inner_code_BER =

  Columns 1 through 5

   0.432228119530795   0.427892439086941   0.423063345443881   0.417639170565289   0.411484513831639

  Columns 6 through 10

   0.404414062734854   0.396165589463048   0.386352217005017   0.374371067284993   0.359208823654880

  Columns 11 through 15

   0.338957885705395   0.309292452373044   0.256880774514599   0.143070975843611   0.003131094718894

  Columns 16 through 20

   0.002655633940905   0.002294811620057   0.002008156687988   0.001773542791940   0.001577434410459

  Columns 21 through 25

   0.001410915630254   0.001267789751867   0.001143577471768   0.001034922383383   0.000939250006730

  Columns 26 through 30

   0.000854543383135   0.000779195894232                   0                   0                   0

  Columns 31 through 35

                   0                   0                   0                   0                   0

  Columns 36 through 40

                   0                   0                   0                   0                   0

  Columns 41 through 45

                   0                   0                   0                   0                   0

  Columns 46 through 50

                   0                   0                   0                   0                   0

  Columns 51 through 55

                   0                   0                   0                   0                   0

  Columns 56 through 60

                   0                   0                   0                   0                   0

  Column 61

                   0


inner_code_BER =

  Columns 1 through 5

   0.432228119530795   0.427892439086941   0.423063345443881   0.417639170565289   0.411484513831639

  Columns 6 through 10

   0.404414062734854   0.396165589463048   0.386352217005017   0.374371067284993   0.359208823654880

  Columns 11 through 15

   0.338957885705395   0.309292452373044   0.256880774514599   0.143070975843611   0.003131094718894

  Columns 16 through 20

   0.002655633940905   0.002294811620057   0.002008156687988   0.001773542791940   0.001577434410459

  Columns 21 through 25

   0.001410915630254   0.001267789751867   0.001143577471768   0.001034922383383   0.000939250006730

  Columns 26 through 30

   0.000854543383135   0.000779195894232   0.000711896277100                   0                   0

  Columns 31 through 35

                   0                   0                   0                   0                   0

  Columns 36 through 40

                   0                   0                   0                   0                   0

  Columns 41 through 45

                   0                   0                   0                   0                   0

  Columns 46 through 50

                   0                   0                   0                   0                   0

  Columns 51 through 55

                   0                   0                   0                   0                   0

  Columns 56 through 60

                   0                   0                   0                   0                   0

  Column 61

                   0


inner_code_BER =

  Columns 1 through 5

   0.432228119530795   0.427892439086941   0.423063345443881   0.417639170565289   0.411484513831639

  Columns 6 through 10

   0.404414062734854   0.396165589463048   0.386352217005017   0.374371067284993   0.359208823654880

  Columns 11 through 15

   0.338957885705395   0.309292452373044   0.256880774514599   0.143070975843611   0.003131094718894

  Columns 16 through 20

   0.002655633940905   0.002294811620057   0.002008156687988   0.001773542791940   0.001577434410459

  Columns 21 through 25

   0.001410915630254   0.001267789751867   0.001143577471768   0.001034922383383   0.000939250006730

  Columns 26 through 30

   0.000854543383135   0.000779195894232   0.000711896277100   0.000651573937876                   0

  Columns 31 through 35

                   0                   0                   0                   0                   0

  Columns 36 through 40

                   0                   0                   0                   0                   0

  Columns 41 through 45

                   0                   0                   0                   0                   0

  Columns 46 through 50

                   0                   0                   0                   0                   0

  Columns 51 through 55

                   0                   0                   0                   0                   0

  Columns 56 through 60

                   0                   0                   0                   0                   0

  Column 61

                   0


inner_code_BER =

  Columns 1 through 5

   0.432228119530795   0.427892439086941   0.423063345443881   0.417639170565289   0.411484513831639

  Columns 6 through 10

   0.404414062734854   0.396165589463048   0.386352217005017   0.374371067284993   0.359208823654880

  Columns 11 through 15

   0.338957885705395   0.309292452373044   0.256880774514599   0.143070975843611   0.003131094718894

  Columns 16 through 20

   0.002655633940905   0.002294811620057   0.002008156687988   0.001773542791940   0.001577434410459

  Columns 21 through 25

   0.001410915630254   0.001267789751867   0.001143577471768   0.001034922383383   0.000939250006730

  Columns 26 through 30

   0.000854543383135   0.000779195894232   0.000711896277100   0.000651573937876   0.000597334699651

  Columns 31 through 35

                   0                   0                   0                   0                   0

  Columns 36 through 40

                   0                   0                   0                   0                   0

  Columns 41 through 45

                   0                   0                   0                   0                   0

  Columns 46 through 50

                   0                   0                   0                   0                   0

  Columns 51 through 55

                   0                   0                   0                   0                   0

  Columns 56 through 60

                   0                   0                   0                   0                   0

  Column 61

                   0


inner_code_BER =

  Columns 1 through 5

   0.432228119530795   0.427892439086941   0.423063345443881   0.417639170565289   0.411484513831639

  Columns 6 through 10

   0.404414062734854   0.396165589463048   0.386352217005017   0.374371067284993   0.359208823654880

  Columns 11 through 15

   0.338957885705395   0.309292452373044   0.256880774514599   0.143070975843611   0.003131094718894

  Columns 16 through 20

   0.002655633940905   0.002294811620057   0.002008156687988   0.001773542791940   0.001577434410459

  Columns 21 through 25

   0.001410915630254   0.001267789751867   0.001143577471768   0.001034922383383   0.000939250006730

  Columns 26 through 30

   0.000854543383135   0.000779195894232   0.000711896277100   0.000651573937876   0.000597334699651

  Columns 31 through 35

   0.000548434419339                   0                   0                   0                   0

  Columns 36 through 40

                   0                   0                   0                   0                   0

  Columns 41 through 45

                   0                   0                   0                   0                   0

  Columns 46 through 50

                   0                   0                   0                   0                   0

  Columns 51 through 55

                   0                   0                   0                   0                   0

  Columns 56 through 60

                   0                   0                   0                   0                   0

  Column 61

                   0


inner_code_BER =

  Columns 1 through 5

   0.432228119530795   0.427892439086941   0.423063345443881   0.417639170565289   0.411484513831639

  Columns 6 through 10

   0.404414062734854   0.396165589463048   0.386352217005017   0.374371067284993   0.359208823654880

  Columns 11 through 15

   0.338957885705395   0.309292452373044   0.256880774514599   0.143070975843611   0.003131094718894

  Columns 16 through 20

   0.002655633940905   0.002294811620057   0.002008156687988   0.001773542791940   0.001577434410459

  Columns 21 through 25

   0.001410915630254   0.001267789751867   0.001143577471768   0.001034922383383   0.000939250006730

  Columns 26 through 30

   0.000854543383135   0.000779195894232   0.000711896277100   0.000651573937876   0.000597334699651

  Columns 31 through 35

   0.000548434419339   0.000504235631737                   0                   0                   0

  Columns 36 through 40

                   0                   0                   0                   0                   0

  Columns 41 through 45

                   0                   0                   0                   0                   0

  Columns 46 through 50

                   0                   0                   0                   0                   0

  Columns 51 through 55

                   0                   0                   0                   0                   0

  Columns 56 through 60

                   0                   0                   0                   0                   0

  Column 61

                   0


inner_code_BER =

  Columns 1 through 5

   0.432228119530795   0.427892439086941   0.423063345443881   0.417639170565289   0.411484513831639

  Columns 6 through 10

   0.404414062734854   0.396165589463048   0.386352217005017   0.374371067284993   0.359208823654880

  Columns 11 through 15

   0.338957885705395   0.309292452373044   0.256880774514599   0.143070975843611   0.003131094718894

  Columns 16 through 20

   0.002655633940905   0.002294811620057   0.002008156687988   0.001773542791940   0.001577434410459

  Columns 21 through 25

   0.001410915630254   0.001267789751867   0.001143577471768   0.001034922383383   0.000939250006730

  Columns 26 through 30

   0.000854543383135   0.000779195894232   0.000711896277100   0.000651573937876   0.000597334699651

  Columns 31 through 35

   0.000548434419339   0.000504235631737   0.000464199843978                   0                   0

  Columns 36 through 40

                   0                   0                   0                   0                   0

  Columns 41 through 45

                   0                   0                   0                   0                   0

  Columns 46 through 50

                   0                   0                   0                   0                   0

  Columns 51 through 55

                   0                   0                   0                   0                   0

  Columns 56 through 60

                   0                   0                   0                   0                   0

  Column 61

                   0


inner_code_BER =

  Columns 1 through 5

   0.432228119530795   0.427892439086941   0.423063345443881   0.417639170565289   0.411484513831639

  Columns 6 through 10

   0.404414062734854   0.396165589463048   0.386352217005017   0.374371067284993   0.359208823654880

  Columns 11 through 15

   0.338957885705395   0.309292452373044   0.256880774514599   0.143070975843611   0.003131094718894

  Columns 16 through 20

   0.002655633940905   0.002294811620057   0.002008156687988   0.001773542791940   0.001577434410459

  Columns 21 through 25

   0.001410915630254   0.001267789751867   0.001143577471768   0.001034922383383   0.000939250006730

  Columns 26 through 30

   0.000854543383135   0.000779195894232   0.000711896277100   0.000651573937876   0.000597334699651

  Columns 31 through 35

   0.000548434419339   0.000504235631737   0.000464199843978   0.000427862432762                   0

  Columns 36 through 40

                   0                   0                   0                   0                   0

  Columns 41 through 45

                   0                   0                   0                   0                   0

  Columns 46 through 50

                   0                   0                   0                   0                   0

  Columns 51 through 55

                   0                   0                   0                   0                   0

  Columns 56 through 60

                   0                   0                   0                   0                   0

  Column 61

                   0


inner_code_BER =

  Columns 1 through 5

   0.432228119530795   0.427892439086941   0.423063345443881   0.417639170565289   0.411484513831639

  Columns 6 through 10

   0.404414062734854   0.396165589463048   0.386352217005017   0.374371067284993   0.359208823654880

  Columns 11 through 15

   0.338957885705395   0.309292452373044   0.256880774514599   0.143070975843611   0.003131094718894

  Columns 16 through 20

   0.002655633940905   0.002294811620057   0.002008156687988   0.001773542791940   0.001577434410459

  Columns 21 through 25

   0.001410915630254   0.001267789751867   0.001143577471768   0.001034922383383   0.000939250006730

  Columns 26 through 30

   0.000854543383135   0.000779195894232   0.000711896277100   0.000651573937876   0.000597334699651

  Columns 31 through 35

   0.000548434419339   0.000504235631737   0.000464199843978   0.000427862432762   0.000394821918776

  Columns 36 through 40

                   0                   0                   0                   0                   0

  Columns 41 through 45

                   0                   0                   0                   0                   0

  Columns 46 through 50

                   0                   0                   0                   0                   0

  Columns 51 through 55

                   0                   0                   0                   0                   0

  Columns 56 through 60

                   0                   0                   0                   0                   0

  Column 61

                   0


inner_code_BER =

  Columns 1 through 5

   0.432228119530795   0.427892439086941   0.423063345443881   0.417639170565289   0.411484513831639

  Columns 6 through 10

   0.404414062734854   0.396165589463048   0.386352217005017   0.374371067284993   0.359208823654880

  Columns 11 through 15

   0.338957885705395   0.309292452373044   0.256880774514599   0.143070975843611   0.003131094718894

  Columns 16 through 20

   0.002655633940905   0.002294811620057   0.002008156687988   0.001773542791940   0.001577434410459

  Columns 21 through 25

   0.001410915630254   0.001267789751867   0.001143577471768   0.001034922383383   0.000939250006730

  Columns 26 through 30

   0.000854543383135   0.000779195894232   0.000711896277100   0.000651573937876   0.000597334699651

  Columns 31 through 35

   0.000548434419339   0.000504235631737   0.000464199843978   0.000427862432762   0.000394821918776

  Columns 36 through 40

   0.000364729406381                   0                   0                   0                   0

  Columns 41 through 45

                   0                   0                   0                   0                   0

  Columns 46 through 50

                   0                   0                   0                   0                   0

  Columns 51 through 55

                   0                   0                   0                   0                   0

  Columns 56 through 60

                   0                   0                   0                   0                   0

  Column 61

                   0


inner_code_BER =

  Columns 1 through 5

   0.432228119530795   0.427892439086941   0.423063345443881   0.417639170565289   0.411484513831639

  Columns 6 through 10

   0.404414062734854   0.396165589463048   0.386352217005017   0.374371067284993   0.359208823654880

  Columns 11 through 15

   0.338957885705395   0.309292452373044   0.256880774514599   0.143070975843611   0.003131094718894

  Columns 16 through 20

   0.002655633940905   0.002294811620057   0.002008156687988   0.001773542791940   0.001577434410459

  Columns 21 through 25

   0.001410915630254   0.001267789751867   0.001143577471768   0.001034922383383   0.000939250006730

  Columns 26 through 30

   0.000854543383135   0.000779195894232   0.000711896277100   0.000651573937876   0.000597334699651

  Columns 31 through 35

   0.000548434419339   0.000504235631737   0.000464199843978   0.000427862432762   0.000394821918776

  Columns 36 through 40

   0.000364729406381   0.000337280176793                   0                   0                   0

  Columns 41 through 45

                   0                   0                   0                   0                   0

  Columns 46 through 50

                   0                   0                   0                   0                   0

  Columns 51 through 55

                   0                   0                   0                   0                   0

  Columns 56 through 60

                   0                   0                   0                   0                   0

  Column 61

                   0


inner_code_BER =

  Columns 1 through 5

   0.432228119530795   0.427892439086941   0.423063345443881   0.417639170565289   0.411484513831639

  Columns 6 through 10

   0.404414062734854   0.396165589463048   0.386352217005017   0.374371067284993   0.359208823654880

  Columns 11 through 15

   0.338957885705395   0.309292452373044   0.256880774514599   0.143070975843611   0.003131094718894

  Columns 16 through 20

   0.002655633940905   0.002294811620057   0.002008156687988   0.001773542791940   0.001577434410459

  Columns 21 through 25

   0.001410915630254   0.001267789751867   0.001143577471768   0.001034922383383   0.000939250006730

  Columns 26 through 30

   0.000854543383135   0.000779195894232   0.000711896277100   0.000651573937876   0.000597334699651

  Columns 31 through 35

   0.000548434419339   0.000504235631737   0.000464199843978   0.000427862432762   0.000394821918776

  Columns 36 through 40

   0.000364729406381   0.000337280176793   0.000312206909380                   0                   0

  Columns 41 through 45

                   0                   0                   0                   0                   0

  Columns 46 through 50

                   0                   0                   0                   0                   0

  Columns 51 through 55

                   0                   0                   0                   0                   0

  Columns 56 through 60

                   0                   0                   0                   0                   0

  Column 61

                   0


inner_code_BER =

  Columns 1 through 5

   0.432228119530795   0.427892439086941   0.423063345443881   0.417639170565289   0.411484513831639

  Columns 6 through 10

   0.404414062734854   0.396165589463048   0.386352217005017   0.374371067284993   0.359208823654880

  Columns 11 through 15

   0.338957885705395   0.309292452373044   0.256880774514599   0.143070975843611   0.003131094718894

  Columns 16 through 20

   0.002655633940905   0.002294811620057   0.002008156687988   0.001773542791940   0.001577434410459

  Columns 21 through 25

   0.001410915630254   0.001267789751867   0.001143577471768   0.001034922383383   0.000939250006730

  Columns 26 through 30

   0.000854543383135   0.000779195894232   0.000711896277100   0.000651573937876   0.000597334699651

  Columns 31 through 35

   0.000548434419339   0.000504235631737   0.000464199843978   0.000427862432762   0.000394821918776

  Columns 36 through 40

   0.000364729406381   0.000337280176793   0.000312206909380   0.000289274171211                   0

  Columns 41 through 45

                   0                   0                   0                   0                   0

  Columns 46 through 50

                   0                   0                   0                   0                   0

  Columns 51 through 55

                   0                   0                   0                   0                   0

  Columns 56 through 60

                   0                   0                   0                   0                   0

  Column 61

                   0


inner_code_BER =

  Columns 1 through 5

   0.432228119530795   0.427892439086941   0.423063345443881   0.417639170565289   0.411484513831639

  Columns 6 through 10

   0.404414062734854   0.396165589463048   0.386352217005017   0.374371067284993   0.359208823654880

  Columns 11 through 15

   0.338957885705395   0.309292452373044   0.256880774514599   0.143070975843611   0.003131094718894

  Columns 16 through 20

   0.002655633940905   0.002294811620057   0.002008156687988   0.001773542791940   0.001577434410459

  Columns 21 through 25

   0.001410915630254   0.001267789751867   0.001143577471768   0.001034922383383   0.000939250006730

  Columns 26 through 30

   0.000854543383135   0.000779195894232   0.000711896277100   0.000651573937876   0.000597334699651

  Columns 31 through 35

   0.000548434419339   0.000504235631737   0.000464199843978   0.000427862432762   0.000394821918776

  Columns 36 through 40

   0.000364729406381   0.000337280176793   0.000312206909380   0.000289274171211   0.000268272658316

  Columns 41 through 45

                   0                   0                   0                   0                   0

  Columns 46 through 50

                   0                   0                   0                   0                   0

  Columns 51 through 55

                   0                   0                   0                   0                   0

  Columns 56 through 60

                   0                   0                   0                   0                   0

  Column 61

                   0


inner_code_BER =

  Columns 1 through 5

   0.432228119530795   0.427892439086941   0.423063345443881   0.417639170565289   0.411484513831639

  Columns 6 through 10

   0.404414062734854   0.396165589463048   0.386352217005017   0.374371067284993   0.359208823654880

  Columns 11 through 15

   0.338957885705395   0.309292452373044   0.256880774514599   0.143070975843611   0.003131094718894

  Columns 16 through 20

   0.002655633940905   0.002294811620057   0.002008156687988   0.001773542791940   0.001577434410459

  Columns 21 through 25

   0.001410915630254   0.001267789751867   0.001143577471768   0.001034922383383   0.000939250006730

  Columns 26 through 30

   0.000854543383135   0.000779195894232   0.000711896277100   0.000651573937876   0.000597334699651

  Columns 31 through 35

   0.000548434419339   0.000504235631737   0.000464199843978   0.000427862432762   0.000394821918776

  Columns 36 through 40

   0.000364729406381   0.000337280176793   0.000312206909380   0.000289274171211   0.000268272658316

  Columns 41 through 45

   0.000249019413356                   0                   0                   0                   0

  Columns 46 through 50

                   0                   0                   0                   0                   0

  Columns 51 through 55

                   0                   0                   0                   0                   0

  Columns 56 through 60

                   0                   0                   0                   0                   0

  Column 61

                   0


inner_code_BER =

  Columns 1 through 5

   0.432228119530795   0.427892439086941   0.423063345443881   0.417639170565289   0.411484513831639

  Columns 6 through 10

   0.404414062734854   0.396165589463048   0.386352217005017   0.374371067284993   0.359208823654880

  Columns 11 through 15

   0.338957885705395   0.309292452373044   0.256880774514599   0.143070975843611   0.003131094718894

  Columns 16 through 20

   0.002655633940905   0.002294811620057   0.002008156687988   0.001773542791940   0.001577434410459

  Columns 21 through 25

   0.001410915630254   0.001267789751867   0.001143577471768   0.001034922383383   0.000939250006730

  Columns 26 through 30

   0.000854543383135   0.000779195894232   0.000711896277100   0.000651573937876   0.000597334699651

  Columns 31 through 35

   0.000548434419339   0.000504235631737   0.000464199843978   0.000427862432762   0.000394821918776

  Columns 36 through 40

   0.000364729406381   0.000337280176793   0.000312206909380   0.000289274171211   0.000268272658316

  Columns 41 through 45

   0.000249019413356   0.000231349527031                   0                   0                   0

  Columns 46 through 50

                   0                   0                   0                   0                   0

  Columns 51 through 55

                   0                   0                   0                   0                   0

  Columns 56 through 60

                   0                   0                   0                   0                   0

  Column 61

                   0


inner_code_BER =

  Columns 1 through 5

   0.432228119530795   0.427892439086941   0.423063345443881   0.417639170565289   0.411484513831639

  Columns 6 through 10

   0.404414062734854   0.396165589463048   0.386352217005017   0.374371067284993   0.359208823654880

  Columns 11 through 15

   0.338957885705395   0.309292452373044   0.256880774514599   0.143070975843611   0.003131094718894

  Columns 16 through 20

   0.002655633940905   0.002294811620057   0.002008156687988   0.001773542791940   0.001577434410459

  Columns 21 through 25

   0.001410915630254   0.001267789751867   0.001143577471768   0.001034922383383   0.000939250006730

  Columns 26 through 30

   0.000854543383135   0.000779195894232   0.000711896277100   0.000651573937876   0.000597334699651

  Columns 31 through 35

   0.000548434419339   0.000504235631737   0.000464199843978   0.000427862432762   0.000394821918776

  Columns 36 through 40

   0.000364729406381   0.000337280176793   0.000312206909380   0.000289274171211   0.000268272658316

  Columns 41 through 45

   0.000249019413356   0.000231349527031   0.000215115173591                   0                   0

  Columns 46 through 50

                   0                   0                   0                   0                   0

  Columns 51 through 55

                   0                   0                   0                   0                   0

  Columns 56 through 60

                   0                   0                   0                   0                   0

  Column 61

                   0


inner_code_BER =

  Columns 1 through 5

   0.432228119530795   0.427892439086941   0.423063345443881   0.417639170565289   0.411484513831639

  Columns 6 through 10

   0.404414062734854   0.396165589463048   0.386352217005017   0.374371067284993   0.359208823654880

  Columns 11 through 15

   0.338957885705395   0.309292452373044   0.256880774514599   0.143070975843611   0.003131094718894

  Columns 16 through 20

   0.002655633940905   0.002294811620057   0.002008156687988   0.001773542791940   0.001577434410459

  Columns 21 through 25

   0.001410915630254   0.001267789751867   0.001143577471768   0.001034922383383   0.000939250006730

  Columns 26 through 30

   0.000854543383135   0.000779195894232   0.000711896277100   0.000651573937876   0.000597334699651

  Columns 31 through 35

   0.000548434419339   0.000504235631737   0.000464199843978   0.000427862432762   0.000394821918776

  Columns 36 through 40

   0.000364729406381   0.000337280176793   0.000312206909380   0.000289274171211   0.000268272658316

  Columns 41 through 45

   0.000249019413356   0.000231349527031   0.000215115173591   0.000200187041210                   0

  Columns 46 through 50

                   0                   0                   0                   0                   0

  Columns 51 through 55

                   0                   0                   0                   0                   0

  Columns 56 through 60

                   0                   0                   0                   0                   0

  Column 61

                   0


inner_code_BER =

  Columns 1 through 5

   0.432228119530795   0.427892439086941   0.423063345443881   0.417639170565289   0.411484513831639

  Columns 6 through 10

   0.404414062734854   0.396165589463048   0.386352217005017   0.374371067284993   0.359208823654880

  Columns 11 through 15

   0.338957885705395   0.309292452373044   0.256880774514599   0.143070975843611   0.003131094718894

  Columns 16 through 20

   0.002655633940905   0.002294811620057   0.002008156687988   0.001773542791940   0.001577434410459

  Columns 21 through 25

   0.001410915630254   0.001267789751867   0.001143577471768   0.001034922383383   0.000939250006730

  Columns 26 through 30

   0.000854543383135   0.000779195894232   0.000711896277100   0.000651573937876   0.000597334699651

  Columns 31 through 35

   0.000548434419339   0.000504235631737   0.000464199843978   0.000427862432762   0.000394821918776

  Columns 36 through 40

   0.000364729406381   0.000337280176793   0.000312206909380   0.000289274171211   0.000268272658316

  Columns 41 through 45

   0.000249019413356   0.000231349527031   0.000215115173591   0.000200187041210   0.000186445971960

  Columns 46 through 50

                   0                   0                   0                   0                   0

  Columns 51 through 55

                   0                   0                   0                   0                   0

  Columns 56 through 60

                   0                   0                   0                   0                   0

  Column 61

                   0


inner_code_BER =

  Columns 1 through 5

   0.432228119530795   0.427892439086941   0.423063345443881   0.417639170565289   0.411484513831639

  Columns 6 through 10

   0.404414062734854   0.396165589463048   0.386352217005017   0.374371067284993   0.359208823654880

  Columns 11 through 15

   0.338957885705395   0.309292452373044   0.256880774514599   0.143070975843611   0.003131094718894

  Columns 16 through 20

   0.002655633940905   0.002294811620057   0.002008156687988   0.001773542791940   0.001577434410459

  Columns 21 through 25

   0.001410915630254   0.001267789751867   0.001143577471768   0.001034922383383   0.000939250006730

  Columns 26 through 30

   0.000854543383135   0.000779195894232   0.000711896277100   0.000651573937876   0.000597334699651

  Columns 31 through 35

   0.000548434419339   0.000504235631737   0.000464199843978   0.000427862432762   0.000394821918776

  Columns 36 through 40

   0.000364729406381   0.000337280176793   0.000312206909380   0.000289274171211   0.000268272658316

  Columns 41 through 45

   0.000249019413356   0.000231349527031   0.000215115173591   0.000200187041210   0.000186445971960

  Columns 46 through 50

   0.000173787730023                   0                   0                   0                   0

  Columns 51 through 55

                   0                   0                   0                   0                   0

  Columns 56 through 60

                   0                   0                   0                   0                   0

  Column 61

                   0


inner_code_BER =

  Columns 1 through 5

   0.432228119530795   0.427892439086941   0.423063345443881   0.417639170565289   0.411484513831639

  Columns 6 through 10

   0.404414062734854   0.396165589463048   0.386352217005017   0.374371067284993   0.359208823654880

  Columns 11 through 15

   0.338957885705395   0.309292452373044   0.256880774514599   0.143070975843611   0.003131094718894

  Columns 16 through 20

   0.002655633940905   0.002294811620057   0.002008156687988   0.001773542791940   0.001577434410459

  Columns 21 through 25

   0.001410915630254   0.001267789751867   0.001143577471768   0.001034922383383   0.000939250006730

  Columns 26 through 30

   0.000854543383135   0.000779195894232   0.000711896277100   0.000651573937876   0.000597334699651

  Columns 31 through 35

   0.000548434419339   0.000504235631737   0.000464199843978   0.000427862432762   0.000394821918776

  Columns 36 through 40

   0.000364729406381   0.000337280176793   0.000312206909380   0.000289274171211   0.000268272658316

  Columns 41 through 45

   0.000249019413356   0.000231349527031   0.000215115173591   0.000200187041210   0.000186445971960

  Columns 46 through 50

   0.000173787730023   0.000162115850775                   0                   0                   0

  Columns 51 through 55

                   0                   0                   0                   0                   0

  Columns 56 through 60

                   0                   0                   0                   0                   0

  Column 61

                   0


inner_code_BER =

  Columns 1 through 5

   0.432228119530795   0.427892439086941   0.423063345443881   0.417639170565289   0.411484513831639

  Columns 6 through 10

   0.404414062734854   0.396165589463048   0.386352217005017   0.374371067284993   0.359208823654880

  Columns 11 through 15

   0.338957885705395   0.309292452373044   0.256880774514599   0.143070975843611   0.003131094718894

  Columns 16 through 20

   0.002655633940905   0.002294811620057   0.002008156687988   0.001773542791940   0.001577434410459

  Columns 21 through 25

   0.001410915630254   0.001267789751867   0.001143577471768   0.001034922383383   0.000939250006730

  Columns 26 through 30

   0.000854543383135   0.000779195894232   0.000711896277100   0.000651573937876   0.000597334699651

  Columns 31 through 35

   0.000548434419339   0.000504235631737   0.000464199843978   0.000427862432762   0.000394821918776

  Columns 36 through 40

   0.000364729406381   0.000337280176793   0.000312206909380   0.000289274171211   0.000268272658316

  Columns 41 through 45

   0.000249019413356   0.000231349527031   0.000215115173591   0.000200187041210   0.000186445971960

  Columns 46 through 50

   0.000173787730023   0.000162115850775   0.000151346015887                   0                   0

  Columns 51 through 55

                   0                   0                   0                   0                   0

  Columns 56 through 60

                   0                   0                   0                   0                   0

  Column 61

                   0


inner_code_BER =

  Columns 1 through 5

   0.432228119530795   0.427892439086941   0.423063345443881   0.417639170565289   0.411484513831639

  Columns 6 through 10

   0.404414062734854   0.396165589463048   0.386352217005017   0.374371067284993   0.359208823654880

  Columns 11 through 15

   0.338957885705395   0.309292452373044   0.256880774514599   0.143070975843611   0.003131094718894

  Columns 16 through 20

   0.002655633940905   0.002294811620057   0.002008156687988   0.001773542791940   0.001577434410459

  Columns 21 through 25

   0.001410915630254   0.001267789751867   0.001143577471768   0.001034922383383   0.000939250006730

  Columns 26 through 30

   0.000854543383135   0.000779195894232   0.000711896277100   0.000651573937876   0.000597334699651

  Columns 31 through 35

   0.000548434419339   0.000504235631737   0.000464199843978   0.000427862432762   0.000394821918776

  Columns 36 through 40

   0.000364729406381   0.000337280176793   0.000312206909380   0.000289274171211   0.000268272658316

  Columns 41 through 45

   0.000249019413356   0.000231349527031   0.000215115173591   0.000200187041210   0.000186445971960

  Columns 46 through 50

   0.000173787730023   0.000162115850775   0.000151346015887   0.000141399161664                   0

  Columns 51 through 55

                   0                   0                   0                   0                   0

  Columns 56 through 60

                   0                   0                   0                   0                   0

  Column 61

                   0


inner_code_BER =

  Columns 1 through 5

   0.432228119530795   0.427892439086941   0.423063345443881   0.417639170565289   0.411484513831639

  Columns 6 through 10

   0.404414062734854   0.396165589463048   0.386352217005017   0.374371067284993   0.359208823654880

  Columns 11 through 15

   0.338957885705395   0.309292452373044   0.256880774514599   0.143070975843611   0.003131094718894

  Columns 16 through 20

   0.002655633940905   0.002294811620057   0.002008156687988   0.001773542791940   0.001577434410459

  Columns 21 through 25

   0.001410915630254   0.001267789751867   0.001143577471768   0.001034922383383   0.000939250006730

  Columns 26 through 30

   0.000854543383135   0.000779195894232   0.000711896277100   0.000651573937876   0.000597334699651

  Columns 31 through 35

   0.000548434419339   0.000504235631737   0.000464199843978   0.000427862432762   0.000394821918776

  Columns 36 through 40

   0.000364729406381   0.000337280176793   0.000312206909380   0.000289274171211   0.000268272658316

  Columns 41 through 45

   0.000249019413356   0.000231349527031   0.000215115173591   0.000200187041210   0.000186445971960

  Columns 46 through 50

   0.000173787730023   0.000162115850775   0.000151346015887   0.000141399161664   0.000132206300898

  Columns 51 through 55

                   0                   0                   0                   0                   0

  Columns 56 through 60

                   0                   0                   0                   0                   0

  Column 61

                   0


inner_code_BER =

  Columns 1 through 5

   0.432228119530795   0.427892439086941   0.423063345443881   0.417639170565289   0.411484513831639

  Columns 6 through 10

   0.404414062734854   0.396165589463048   0.386352217005017   0.374371067284993   0.359208823654880

  Columns 11 through 15

   0.338957885705395   0.309292452373044   0.256880774514599   0.143070975843611   0.003131094718894

  Columns 16 through 20

   0.002655633940905   0.002294811620057   0.002008156687988   0.001773542791940   0.001577434410459

  Columns 21 through 25

   0.001410915630254   0.001267789751867   0.001143577471768   0.001034922383383   0.000939250006730

  Columns 26 through 30

   0.000854543383135   0.000779195894232   0.000711896277100   0.000651573937876   0.000597334699651

  Columns 31 through 35

   0.000548434419339   0.000504235631737   0.000464199843978   0.000427862432762   0.000394821918776

  Columns 36 through 40

   0.000364729406381   0.000337280176793   0.000312206909380   0.000289274171211   0.000268272658316

  Columns 41 through 45

   0.000249019413356   0.000231349527031   0.000215115173591   0.000200187041210   0.000186445971960

  Columns 46 through 50

   0.000173787730023   0.000162115850775   0.000151346015887   0.000141399161664   0.000132206300898

  Columns 51 through 55

   0.000123704092509                   0                   0                   0                   0

  Columns 56 through 60

                   0                   0                   0                   0                   0

  Column 61

                   0


inner_code_BER =

  Columns 1 through 5

   0.432228119530795   0.427892439086941   0.423063345443881   0.417639170565289   0.411484513831639

  Columns 6 through 10

   0.404414062734854   0.396165589463048   0.386352217005017   0.374371067284993   0.359208823654880

  Columns 11 through 15

   0.338957885705395   0.309292452373044   0.256880774514599   0.143070975843611   0.003131094718894

  Columns 16 through 20

   0.002655633940905   0.002294811620057   0.002008156687988   0.001773542791940   0.001577434410459

  Columns 21 through 25

   0.001410915630254   0.001267789751867   0.001143577471768   0.001034922383383   0.000939250006730

  Columns 26 through 30

   0.000854543383135   0.000779195894232   0.000711896277100   0.000651573937876   0.000597334699651

  Columns 31 through 35

   0.000548434419339   0.000504235631737   0.000464199843978   0.000427862432762   0.000394821918776

  Columns 36 through 40

   0.000364729406381   0.000337280176793   0.000312206909380   0.000289274171211   0.000268272658316

  Columns 41 through 45

   0.000249019413356   0.000231349527031   0.000215115173591   0.000200187041210   0.000186445971960

  Columns 46 through 50

   0.000173787730023   0.000162115850775   0.000151346015887   0.000141399161664   0.000132206300898

  Columns 51 through 55

   0.000123704092509   0.000115834045563                   0                   0                   0

  Columns 56 through 60

                   0                   0                   0                   0                   0

  Column 61

                   0


inner_code_BER =

  Columns 1 through 5

   0.432228119530795   0.427892439086941   0.423063345443881   0.417639170565289   0.411484513831639

  Columns 6 through 10

   0.404414062734854   0.396165589463048   0.386352217005017   0.374371067284993   0.359208823654880

  Columns 11 through 15

   0.338957885705395   0.309292452373044   0.256880774514599   0.143070975843611   0.003131094718894

  Columns 16 through 20

   0.002655633940905   0.002294811620057   0.002008156687988   0.001773542791940   0.001577434410459

  Columns 21 through 25

   0.001410915630254   0.001267789751867   0.001143577471768   0.001034922383383   0.000939250006730

  Columns 26 through 30

   0.000854543383135   0.000779195894232   0.000711896277100   0.000651573937876   0.000597334699651

  Columns 31 through 35

   0.000548434419339   0.000504235631737   0.000464199843978   0.000427862432762   0.000394821918776

  Columns 36 through 40

   0.000364729406381   0.000337280176793   0.000312206909380   0.000289274171211   0.000268272658316

  Columns 41 through 45

   0.000249019413356   0.000231349527031   0.000215115173591   0.000200187041210   0.000186445971960

  Columns 46 through 50

   0.000173787730023   0.000162115850775   0.000151346015887   0.000141399161664   0.000132206300898

  Columns 51 through 55

   0.000123704092509   0.000115834045563   0.000108544482486                   0                   0

  Columns 56 through 60

                   0                   0                   0                   0                   0

  Column 61

                   0


inner_code_BER =

  Columns 1 through 5

   0.432228119530795   0.427892439086941   0.423063345443881   0.417639170565289   0.411484513831639

  Columns 6 through 10

   0.404414062734854   0.396165589463048   0.386352217005017   0.374371067284993   0.359208823654880

  Columns 11 through 15

   0.338957885705395   0.309292452373044   0.256880774514599   0.143070975843611   0.003131094718894

  Columns 16 through 20

   0.002655633940905   0.002294811620057   0.002008156687988   0.001773542791940   0.001577434410459

  Columns 21 through 25

   0.001410915630254   0.001267789751867   0.001143577471768   0.001034922383383   0.000939250006730

  Columns 26 through 30

   0.000854543383135   0.000779195894232   0.000711896277100   0.000651573937876   0.000597334699651

  Columns 31 through 35

   0.000548434419339   0.000504235631737   0.000464199843978   0.000427862432762   0.000394821918776

  Columns 36 through 40

   0.000364729406381   0.000337280176793   0.000312206909380   0.000289274171211   0.000268272658316

  Columns 41 through 45

   0.000249019413356   0.000231349527031   0.000215115173591   0.000200187041210   0.000186445971960

  Columns 46 through 50

   0.000173787730023   0.000162115850775   0.000151346015887   0.000141399161664   0.000132206300898

  Columns 51 through 55

   0.000123704092509   0.000115834045563   0.000108544482486   0.000101788042838                   0

  Columns 56 through 60

                   0                   0                   0                   0                   0

  Column 61

                   0


inner_code_BER =

  Columns 1 through 5

   0.432228119530795   0.427892439086941   0.423063345443881   0.417639170565289   0.411484513831639

  Columns 6 through 10

   0.404414062734854   0.396165589463048   0.386352217005017   0.374371067284993   0.359208823654880

  Columns 11 through 15

   0.338957885705395   0.309292452373044   0.256880774514599   0.143070975843611   0.003131094718894

  Columns 16 through 20

   0.002655633940905   0.002294811620057   0.002008156687988   0.001773542791940   0.001577434410459

  Columns 21 through 25

   0.001410915630254   0.001267789751867   0.001143577471768   0.001034922383383   0.000939250006730

  Columns 26 through 30

   0.000854543383135   0.000779195894232   0.000711896277100   0.000651573937876   0.000597334699651

  Columns 31 through 35

   0.000548434419339   0.000504235631737   0.000464199843978   0.000427862432762   0.000394821918776

  Columns 36 through 40

   0.000364729406381   0.000337280176793   0.000312206909380   0.000289274171211   0.000268272658316

  Columns 41 through 45

   0.000249019413356   0.000231349527031   0.000215115173591   0.000200187041210   0.000186445971960

  Columns 46 through 50

   0.000173787730023   0.000162115850775   0.000151346015887   0.000141399161664   0.000132206300898

  Columns 51 through 55

   0.000123704092509   0.000115834045563   0.000108544482486   0.000101788042838   0.000095520645910

  Columns 56 through 60

                   0                   0                   0                   0                   0

  Column 61

                   0

µ±Ç°ÄÚÂëÎóÂëÂÊÒÑµÍÓÚÄ¿±êÎóÂëÂÊ£¬ÐÅÔë±ÈÎª5.40 dB
Elapsed time is 22599.799472 seconds.
