# Supplementary material for: An Efficient Design of Systematic Rateless Codes
Source: Hindawi journal article supplement (doi:10.1155/2020/8068414), 2020-05-19
Supplement: f1 [file 8068414.f1.zip › supplementary files/Matlab_code_for_Figure1/BER_by_DDE/仿真结果/BER_by_DDE_rician_rate_1_2_dist1_s.txt]

��ǰ�ŵ�Ϊ��˹�ŵ�������gamma=2

EbN0indB_vec =

  Columns 1 through 5

                   0   0.100000000000000   0.200000000000000   0.300000000000000   0.400000000000000

  Columns 6 through 10

   0.500000000000000   0.600000000000000   0.700000000000000   0.800000000000000   0.900000000000000

  Columns 11 through 15

   1.000000000000000   1.100000000000000   1.200000000000000   1.300000000000000   1.400000000000000

  Columns 16 through 20

   1.500000000000000   1.600000000000000   1.700000000000000   1.800000000000000   1.900000000000000

  Columns 21 through 25

   2.000000000000000   2.100000000000000   2.200000000000000   2.300000000000000   2.400000000000000

  Columns 26 through 30

   2.500000000000000   2.600000000000000   2.700000000000000   2.800000000000000   2.900000000000000

  Columns 31 through 35

   3.000000000000000   3.100000000000000   3.200000000000000   3.300000000000000   3.400000000000000

  Columns 36 through 40

   3.500000000000000   3.600000000000000   3.700000000000000   3.800000000000000   3.900000000000000

  Columns 41 through 45

   4.000000000000000   4.100000000000000   4.200000000000000   4.300000000000000   4.400000000000000

  Columns 46 through 50

   4.500000000000000   4.600000000000000   4.700000000000000   4.800000000000000   4.900000000000000

  Columns 51 through 55

   5.000000000000000   5.100000000000000   5.200000000000000   5.300000000000000   5.400000000000000

  Columns 56 through 60

   5.500000000000000   5.600000000000000   5.700000000000000   5.800000000000000   5.900000000000000

  Column 61

   6.000000000000000

�Ʊ��ɹ�
��ǰѡ��Raptor��
��ǰѡ��ϵͳ��
������=0.50000, ��������=0.98039, ��������=0.51000

out_node_index =

     1     2     3     4     5    11    40


ans =

  Columns 1 through 5

   0.009670000000000   0.450250000000000   0.209370000000000   0.023320000000000   0.147350000000000

  Columns 6 through 7

   0.112249000000000   0.047550000000000


inner_code_BER =

  Columns 1 through 5

   0.120918740878549                   0                   0                   0                   0

  Columns 6 through 10

                   0                   0                   0                   0                   0

  Columns 11 through 15

                   0                   0                   0                   0                   0

  Columns 16 through 20

                   0                   0                   0                   0                   0

  Columns 21 through 25

                   0                   0                   0                   0                   0

  Columns 26 through 30

                   0                   0                   0                   0                   0

  Columns 31 through 35

                   0                   0                   0                   0                   0

  Columns 36 through 40

                   0                   0                   0                   0                   0

  Columns 41 through 45

                   0                   0                   0                   0                   0

  Columns 46 through 50

                   0                   0                   0                   0                   0

  Columns 51 through 55

                   0                   0                   0                   0                   0

  Columns 56 through 60

                   0                   0                   0                   0                   0

  Column 61

                   0


outer_code_BER =

  Columns 1 through 5

   0.120918740878550                   0                   0                   0                   0

  Columns 6 through 10

                   0                   0                   0                   0                   0

  Columns 11 through 15

                   0                   0                   0                   0                   0

  Columns 16 through 20

                   0                   0                   0                   0                   0

  Columns 21 through 25

                   0                   0                   0                   0                   0

  Columns 26 through 30

                   0                   0                   0                   0                   0

  Columns 31 through 35

                   0                   0                   0                   0                   0

  Columns 36 through 40

                   0                   0                   0                   0                   0

  Columns 41 through 45

                   0                   0                   0                   0                   0

  Columns 46 through 50

                   0                   0                   0                   0                   0

  Columns 51 through 55

                   0                   0                   0                   0                   0

  Columns 56 through 60

                   0                   0                   0                   0                   0

  Column 61

                   0


inner_code_BER =

  Columns 1 through 5

   0.120918740878549   0.117333100156390                   0                   0                   0

  Columns 6 through 10

                   0                   0                   0                   0                   0

  Columns 11 through 15

                   0                   0                   0                   0                   0

  Columns 16 through 20

                   0                   0                   0                   0                   0

  Columns 21 through 25

                   0                   0                   0                   0                   0

  Columns 26 through 30

                   0                   0                   0                   0                   0

  Columns 31 through 35

                   0                   0                   0                   0                   0

  Columns 36 through 40

                   0                   0                   0                   0                   0

  Columns 41 through 45

                   0                   0                   0                   0                   0

  Columns 46 through 50

                   0                   0                   0                   0                   0

  Columns 51 through 55

                   0                   0                   0                   0                   0

  Columns 56 through 60

                   0                   0                   0                   0                   0

  Column 61

                   0


outer_code_BER =

  Columns 1 through 5

   0.120918740878550   0.117333100156390                   0                   0                   0

  Columns 6 through 10

                   0                   0                   0                   0                   0

  Columns 11 through 15

                   0                   0                   0                   0                   0

  Columns 16 through 20

                   0                   0                   0                   0                   0

  Columns 21 through 25

                   0                   0                   0                   0                   0

  Columns 26 through 30

                   0                   0                   0                   0                   0

  Columns 31 through 35

                   0                   0                   0                   0                   0

  Columns 36 through 40

                   0                   0                   0                   0                   0

  Columns 41 through 45

                   0                   0                   0                   0                   0

  Columns 46 through 50

                   0                   0                   0                   0                   0

  Columns 51 through 55

                   0                   0                   0                   0                   0

  Columns 56 through 60

                   0                   0                   0                   0                   0

  Column 61

                   0


inner_code_BER =

  Columns 1 through 5

   0.120918740878549   0.117333100156390   0.113754271868533                   0                   0

  Columns 6 through 10

                   0                   0                   0                   0                   0

  Columns 11 through 15

                   0                   0                   0                   0                   0

  Columns 16 through 20

                   0                   0                   0                   0                   0

  Columns 21 through 25

                   0                   0                   0                   0                   0

  Columns 26 through 30

                   0                   0                   0                   0                   0

  Columns 31 through 35

                   0                   0                   0                   0                   0

  Columns 36 through 40

                   0                   0                   0                   0                   0

  Columns 41 through 45

                   0                   0                   0                   0                   0

  Columns 46 through 50

                   0                   0                   0                   0                   0

  Columns 51 through 55

                   0                   0                   0                   0                   0

  Columns 56 through 60

                   0                   0                   0                   0                   0

  Column 61

                   0


outer_code_BER =

  Columns 1 through 5

   0.120918740878550   0.117333100156390   0.113754271868533                   0                   0

  Columns 6 through 10

                   0                   0                   0                   0                   0

  Columns 11 through 15

                   0                   0                   0                   0                   0

  Columns 16 through 20

                   0                   0                   0                   0                   0

  Columns 21 through 25

                   0                   0                   0                   0                   0

  Columns 26 through 30

                   0                   0                   0                   0                   0

  Columns 31 through 35

                   0                   0                   0                   0                   0

  Columns 36 through 40

                   0                   0                   0                   0                   0

  Columns 41 through 45

                   0                   0                   0                   0                   0

  Columns 46 through 50

                   0                   0                   0                   0                   0

  Columns 51 through 55

                   0                   0                   0                   0                   0

  Columns 56 through 60

                   0                   0                   0                   0                   0

  Column 61

                   0


inner_code_BER =

  Columns 1 through 5

   0.120918740878549   0.117333100156390   0.113754271868533   0.110184228504477                   0

  Columns 6 through 10

                   0                   0                   0                   0                   0

  Columns 11 through 15

                   0                   0                   0                   0                   0

  Columns 16 through 20

                   0                   0                   0                   0                   0

  Columns 21 through 25

                   0                   0                   0                   0                   0

  Columns 26 through 30

                   0                   0                   0                   0                   0

  Columns 31 through 35

                   0                   0                   0                   0                   0

  Columns 36 through 40

                   0                   0                   0                   0                   0

  Columns 41 through 45

                   0                   0                   0                   0                   0

  Columns 46 through 50

                   0                   0                   0                   0                   0

  Columns 51 through 55

                   0                   0                   0                   0                   0

  Columns 56 through 60

                   0                   0                   0                   0                   0

  Column 61

                   0


outer_code_BER =

  Columns 1 through 5

   0.120918740878550   0.117333100156390   0.113754271868533   0.110184228504477                   0

  Columns 6 through 10

                   0                   0                   0                   0                   0

  Columns 11 through 15

                   0                   0                   0                   0                   0

  Columns 16 through 20

                   0                   0                   0                   0                   0

  Columns 21 through 25

                   0                   0                   0                   0                   0

  Columns 26 through 30

                   0                   0                   0                   0                   0

  Columns 31 through 35

                   0                   0                   0                   0                   0

  Columns 36 through 40

                   0                   0                   0                   0                   0

  Columns 41 through 45

                   0                   0                   0                   0                   0

  Columns 46 through 50

                   0                   0                   0                   0                   0

  Columns 51 through 55

                   0                   0                   0                   0                   0

  Columns 56 through 60

                   0                   0                   0                   0                   0

  Column 61

                   0


inner_code_BER =

  Columns 1 through 5

   0.120918740878549   0.117333100156390   0.113754271868533   0.110184228504477   0.106625029022009

  Columns 6 through 10

                   0                   0                   0                   0                   0

  Columns 11 through 15

                   0                   0                   0                   0                   0

  Columns 16 through 20

                   0                   0                   0                   0                   0

  Columns 21 through 25

                   0                   0                   0                   0                   0

  Columns 26 through 30

                   0                   0                   0                   0                   0

  Columns 31 through 35

                   0                   0                   0                   0                   0

  Columns 36 through 40

                   0                   0                   0                   0                   0

  Columns 41 through 45

                   0                   0                   0                   0                   0

  Columns 46 through 50

                   0                   0                   0                   0                   0

  Columns 51 through 55

                   0                   0                   0                   0                   0

  Columns 56 through 60

                   0                   0                   0                   0                   0

  Column 61

                   0


outer_code_BER =

  Columns 1 through 5

   0.120918740878550   0.117333100156390   0.113754271868533   0.110184228504477   0.106625029022010

  Columns 6 through 10

                   0                   0                   0                   0                   0

  Columns 11 through 15

                   0                   0                   0                   0                   0

  Columns 16 through 20

                   0                   0                   0                   0                   0

  Columns 21 through 25

                   0                   0                   0                   0                   0

  Columns 26 through 30

                   0                   0                   0                   0                   0

  Columns 31 through 35

                   0                   0                   0                   0                   0

  Columns 36 through 40

                   0                   0                   0                   0                   0

  Columns 41 through 45

                   0                   0                   0                   0                   0

  Columns 46 through 50

                   0                   0                   0                   0                   0

  Columns 51 through 55

                   0                   0                   0                   0                   0

  Columns 56 through 60

                   0                   0                   0                   0                   0

  Column 61

                   0


inner_code_BER =

  Columns 1 through 5

   0.120918740878549   0.117333100156390   0.113754271868533   0.110184228504477   0.106625029022009

  Columns 6 through 10

   0.103078846910973                   0                   0                   0                   0

  Columns 11 through 15

                   0                   0                   0                   0                   0

  Columns 16 through 20

                   0                   0                   0                   0                   0

  Columns 21 through 25

                   0                   0                   0                   0                   0

  Columns 26 through 30

                   0                   0                   0                   0                   0

  Columns 31 through 35

                   0                   0                   0                   0                   0

  Columns 36 through 40

                   0                   0                   0                   0                   0

  Columns 41 through 45

                   0                   0                   0                   0                   0

  Columns 46 through 50

                   0                   0                   0                   0                   0

  Columns 51 through 55

                   0                   0                   0                   0                   0

  Columns 56 through 60

                   0                   0                   0                   0                   0

  Column 61

                   0


outer_code_BER =

  Columns 1 through 5

   0.120918740878550   0.117333100156390   0.113754271868533   0.110184228504477   0.106625029022010

  Columns 6 through 10

   0.103078846910974                   0                   0                   0                   0

  Columns 11 through 15

                   0                   0                   0                   0                   0

  Columns 16 through 20

                   0                   0                   0                   0                   0

  Columns 21 through 25

                   0                   0                   0                   0                   0

  Columns 26 through 30

                   0                   0                   0                   0                   0

  Columns 31 through 35

                   0                   0                   0                   0                   0

  Columns 36 through 40

                   0                   0                   0                   0                   0

  Columns 41 through 45

                   0                   0                   0                   0                   0

  Columns 46 through 50

                   0                   0                   0                   0                   0

  Columns 51 through 55

                   0                   0                   0                   0                   0

  Columns 56 through 60

                   0                   0                   0                   0                   0

  Column 61

                   0


inner_code_BER =

  Columns 1 through 5

   0.120918740878549   0.117333100156390   0.113754271868533   0.110184228504477   0.106625029022009

  Columns 6 through 10

   0.103078846910973   0.099548002978232                   0                   0                   0

  Columns 11 through 15

                   0                   0                   0                   0                   0

  Columns 16 through 20

                   0                   0                   0                   0                   0

  Columns 21 through 25

                   0                   0                   0                   0                   0

  Columns 26 through 30

                   0                   0                   0                   0                   0

  Columns 31 through 35

                   0                   0                   0                   0                   0

  Columns 36 through 40

                   0                   0                   0                   0                   0

  Columns 41 through 45

                   0                   0                   0                   0                   0

  Columns 46 through 50

                   0                   0                   0                   0                   0

  Columns 51 through 55

                   0                   0                   0                   0                   0

  Columns 56 through 60

                   0                   0                   0                   0                   0

  Column 61

                   0


outer_code_BER =

  Columns 1 through 5

   0.120918740878550   0.117333100156390   0.113754271868533   0.110184228504477   0.106625029022010

  Columns 6 through 10

   0.103078846910974   0.099548002978233                   0                   0                   0

  Columns 11 through 15

                   0                   0                   0                   0                   0

  Columns 16 through 20

                   0                   0                   0                   0                   0

  Columns 21 through 25

                   0                   0                   0                   0                   0

  Columns 26 through 30

                   0                   0                   0                   0                   0

  Columns 31 through 35

                   0                   0                   0                   0                   0

  Columns 36 through 40

                   0                   0                   0                   0                   0

  Columns 41 through 45

                   0                   0                   0                   0                   0

  Columns 46 through 50

                   0                   0                   0                   0                   0

  Columns 51 through 55

                   0                   0                   0                   0                   0

  Columns 56 through 60

                   0                   0                   0                   0                   0

  Column 61

                   0


inner_code_BER =

  Columns 1 through 5

   0.120918740878549   0.117333100156390   0.113754271868533   0.110184228504477   0.106625029022009

  Columns 6 through 10

   0.103078846910973   0.099548002978232   0.096034959550923                   0                   0

  Columns 11 through 15

                   0                   0                   0                   0                   0

  Columns 16 through 20

                   0                   0                   0                   0                   0

  Columns 21 through 25

                   0                   0                   0                   0                   0

  Columns 26 through 30

                   0                   0                   0                   0                   0

  Columns 31 through 35

                   0                   0                   0                   0                   0

  Columns 36 through 40

                   0                   0                   0                   0                   0

  Columns 41 through 45

                   0                   0                   0                   0                   0

  Columns 46 through 50

                   0                   0                   0                   0                   0

  Columns 51 through 55

                   0                   0                   0                   0                   0

  Columns 56 through 60

                   0                   0                   0                   0                   0

  Column 61

                   0


outer_code_BER =

  Columns 1 through 5

   0.120918740878550   0.117333100156390   0.113754271868533   0.110184228504477   0.106625029022010

  Columns 6 through 10

   0.103078846910974   0.099548002978233   0.096034959550922                   0                   0

  Columns 11 through 15

                   0                   0                   0                   0                   0

  Columns 16 through 20

                   0                   0                   0                   0                   0

  Columns 21 through 25

                   0                   0                   0                   0                   0

  Columns 26 through 30

                   0                   0                   0                   0                   0

  Columns 31 through 35

                   0                   0                   0                   0                   0

  Columns 36 through 40

                   0                   0                   0                   0                   0

  Columns 41 through 45

                   0                   0                   0                   0                   0

  Columns 46 through 50

                   0                   0                   0                   0                   0

  Columns 51 through 55

                   0                   0                   0                   0                   0

  Columns 56 through 60

                   0                   0                   0                   0                   0

  Column 61

                   0


inner_code_BER =

  Columns 1 through 5

   0.120918740878549   0.117333100156390   0.113754271868533   0.110184228504477   0.106625029022009

  Columns 6 through 10

   0.103078846910973   0.099548002978232   0.096034959550923   0.092542353197978                   0

  Columns 11 through 15

                   0                   0                   0                   0                   0

  Columns 16 through 20

                   0                   0                   0                   0                   0

  Columns 21 through 25

                   0                   0                   0                   0                   0

  Columns 26 through 30

                   0                   0                   0                   0                   0

  Columns 31 through 35

                   0                   0                   0                   0                   0

  Columns 36 through 40

                   0                   0                   0                   0                   0

  Columns 41 through 45

                   0                   0                   0                   0                   0

  Columns 46 through 50

                   0                   0                   0                   0                   0

  Columns 51 through 55

                   0                   0                   0                   0                   0

  Columns 56 through 60

                   0                   0                   0                   0                   0

  Column 61

                   0


outer_code_BER =

  Columns 1 through 5

   0.120918740878550   0.117333100156390   0.113754271868533   0.110184228504477   0.106625029022010

  Columns 6 through 10

   0.103078846910974   0.099548002978233   0.096034959550922   0.092542353197978                   0

  Columns 11 through 15

                   0                   0                   0                   0                   0

  Columns 16 through 20

                   0                   0                   0                   0                   0

  Columns 21 through 25

                   0                   0                   0                   0                   0

  Columns 26 through 30

                   0                   0                   0                   0                   0

  Columns 31 through 35

                   0                   0                   0                   0                   0

  Columns 36 through 40

                   0                   0                   0                   0                   0

  Columns 41 through 45

                   0                   0                   0                   0                   0

  Columns 46 through 50

                   0                   0                   0                   0                   0

  Columns 51 through 55

                   0                   0                   0                   0                   0

  Columns 56 through 60

                   0                   0                   0                   0                   0

  Column 61

                   0


inner_code_BER =

  Columns 1 through 5

   0.120918740878549   0.117333100156390   0.113754271868533   0.110184228504477   0.106625029022009

  Columns 6 through 10

   0.103078846910973   0.099548002978232   0.096034959550923   0.092542353197978   0.089073031956679

  Columns 11 through 15

                   0                   0                   0                   0                   0

  Columns 16 through 20

                   0                   0                   0                   0                   0

  Columns 21 through 25

                   0                   0                   0                   0                   0

  Columns 26 through 30

                   0                   0                   0                   0                   0

  Columns 31 through 35

                   0                   0                   0                   0                   0

  Columns 36 through 40

                   0                   0                   0                   0                   0

  Columns 41 through 45

                   0                   0                   0                   0                   0

  Columns 46 through 50

                   0                   0                   0                   0                   0

  Columns 51 through 55

                   0                   0                   0                   0                   0

  Columns 56 through 60

                   0                   0                   0                   0                   0

  Column 61

                   0


outer_code_BER =

  Columns 1 through 5

   0.120918740878550   0.117333100156390   0.113754271868533   0.110184228504477   0.106625029022010

  Columns 6 through 10

   0.103078846910974   0.099548002978233   0.096034959550922   0.092542353197978   0.089073031956679

  Columns 11 through 15

                   0                   0                   0                   0                   0

  Columns 16 through 20

                   0                   0                   0                   0                   0

  Columns 21 through 25

                   0                   0                   0                   0                   0

  Columns 26 through 30

                   0                   0                   0                   0                   0

  Columns 31 through 35

                   0                   0                   0                   0                   0

  Columns 36 through 40

                   0                   0                   0                   0                   0

  Columns 41 through 45

                   0                   0                   0                   0                   0

  Columns 46 through 50

                   0                   0                   0                   0                   0

  Columns 51 through 55

                   0                   0                   0                   0                   0

  Columns 56 through 60

                   0                   0                   0                   0                   0

  Column 61

                   0


inner_code_BER =

  Columns 1 through 5

   0.120918740878549   0.117333100156390   0.113754271868533   0.110184228504477   0.106625029022009

  Columns 6 through 10

   0.103078846910973   0.099548002978232   0.096034959550923   0.092542353197978   0.089073031956679

  Columns 11 through 15

   0.085630049437032                   0                   0                   0                   0

  Columns 16 through 20

                   0                   0                   0                   0                   0

  Columns 21 through 25

                   0                   0                   0                   0                   0

  Columns 26 through 30

                   0                   0                   0                   0                   0

  Columns 31 through 35

                   0                   0                   0                   0                   0

  Columns 36 through 40

                   0                   0                   0                   0                   0

  Columns 41 through 45

                   0                   0                   0                   0                   0

  Columns 46 through 50

                   0                   0                   0                   0                   0

  Columns 51 through 55

                   0                   0                   0                   0                   0

  Columns 56 through 60

                   0                   0                   0                   0                   0

  Column 61

                   0


outer_code_BER =

  Columns 1 through 5

   0.120918740878550   0.117333100156390   0.113754271868533   0.110184228504477   0.106625029022010

  Columns 6 through 10

   0.103078846910974   0.099548002978233   0.096034959550922   0.092542353197978   0.089073031956679

  Columns 11 through 15

   0.085630049437032                   0                   0                   0                   0

  Columns 16 through 20

                   0                   0                   0                   0                   0

  Columns 21 through 25

                   0                   0                   0                   0                   0

  Columns 26 through 30

                   0                   0                   0                   0                   0

  Columns 31 through 35

                   0                   0                   0                   0                   0

  Columns 36 through 40

                   0                   0                   0                   0                   0

  Columns 41 through 45

                   0                   0                   0                   0                   0

  Columns 46 through 50

                   0                   0                   0                   0                   0

  Columns 51 through 55

                   0                   0                   0                   0                   0

  Columns 56 through 60

                   0                   0                   0                   0                   0

  Column 61

                   0


inner_code_BER =

  Columns 1 through 5

   0.120918740878549   0.117333100156390   0.113754271868533   0.110184228504477   0.106625029022009

  Columns 6 through 10

   0.103078846910973   0.099548002978232   0.096034959550923   0.092542353197978   0.089073031956679

  Columns 11 through 15

   0.085630049437032   0.082216693243584                   0                   0                   0

  Columns 16 through 20

                   0                   0                   0                   0                   0

  Columns 21 through 25

                   0                   0                   0                   0                   0

  Columns 26 through 30

                   0                   0                   0                   0                   0

  Columns 31 through 35

                   0                   0                   0                   0                   0

  Columns 36 through 40

                   0                   0                   0                   0                   0

  Columns 41 through 45

                   0                   0                   0                   0                   0

  Columns 46 through 50

                   0                   0                   0                   0                   0

  Columns 51 through 55

                   0                   0                   0                   0                   0

  Columns 56 through 60

                   0                   0                   0                   0                   0

  Column 61

                   0


outer_code_BER =

  Columns 1 through 5

   0.120918740878550   0.117333100156390   0.113754271868533   0.110184228504477   0.106625029022010

  Columns 6 through 10

   0.103078846910974   0.099548002978233   0.096034959550922   0.092542353197978   0.089073031956679

  Columns 11 through 15

   0.085630049437032   0.082216693243585                   0                   0                   0

  Columns 16 through 20

                   0                   0                   0                   0                   0

  Columns 21 through 25

                   0                   0                   0                   0                   0

  Columns 26 through 30

                   0                   0                   0                   0                   0

  Columns 31 through 35

                   0                   0                   0                   0                   0

  Columns 36 through 40

                   0                   0                   0                   0                   0

  Columns 41 through 45

                   0                   0                   0                   0                   0

  Columns 46 through 50

                   0                   0                   0                   0                   0

  Columns 51 through 55

                   0                   0                   0                   0                   0

  Columns 56 through 60

                   0                   0                   0                   0                   0

  Column 61

                   0


inner_code_BER =

  Columns 1 through 5

   0.120918740878549   0.117333100156390   0.113754271868533   0.110184228504477   0.106625029022009

  Columns 6 through 10

   0.103078846910973   0.099548002978232   0.096034959550923   0.092542353197978   0.089073031956679

  Columns 11 through 15

   0.085630049437032   0.082216693243584   0.078836513027406                   0                   0

  Columns 16 through 20

                   0                   0                   0                   0                   0

  Columns 21 through 25

                   0                   0                   0                   0                   0

  Columns 26 through 30

                   0                   0                   0                   0                   0

  Columns 31 through 35

                   0                   0                   0                   0                   0

  Columns 36 through 40

                   0                   0                   0                   0                   0

  Columns 41 through 45

                   0                   0                   0                   0                   0

  Columns 46 through 50

                   0                   0                   0                   0                   0

  Columns 51 through 55

                   0                   0                   0                   0                   0

  Columns 56 through 60

                   0                   0                   0                   0                   0

  Column 61

                   0


outer_code_BER =

  Columns 1 through 5

   0.120918740878550   0.117333100156390   0.113754271868533   0.110184228504477   0.106625029022010

  Columns 6 through 10

   0.103078846910974   0.099548002978233   0.096034959550922   0.092542353197978   0.089073031956679

  Columns 11 through 15

   0.085630049437032   0.082216693243585   0.078836513027409                   0                   0

  Columns 16 through 20

                   0                   0                   0                   0                   0

  Columns 21 through 25

                   0                   0                   0                   0                   0

  Columns 26 through 30

                   0                   0                   0                   0                   0

  Columns 31 through 35

                   0                   0                   0                   0                   0

  Columns 36 through 40

                   0                   0                   0                   0                   0

  Columns 41 through 45

                   0                   0                   0                   0                   0

  Columns 46 through 50

                   0                   0                   0                   0                   0

  Columns 51 through 55

                   0                   0                   0                   0                   0

  Columns 56 through 60

                   0                   0                   0                   0                   0

  Column 61

                   0


inner_code_BER =

  Columns 1 through 5

   0.120918740878549   0.117333100156390   0.113754271868533   0.110184228504477   0.106625029022009

  Columns 6 through 10

   0.103078846910973   0.099548002978232   0.096034959550923   0.092542353197978   0.089073031956679

  Columns 11 through 15

   0.085630049437032   0.082216693243584   0.078836513027406   0.075493293060834                   0

  Columns 16 through 20

                   0                   0                   0                   0                   0

  Columns 21 through 25

                   0                   0                   0                   0                   0

  Columns 26 through 30

                   0                   0                   0                   0                   0

  Columns 31 through 35

                   0                   0                   0                   0                   0

  Columns 36 through 40

                   0                   0                   0                   0                   0

  Columns 41 through 45

                   0                   0                   0                   0                   0

  Columns 46 through 50

                   0                   0                   0                   0                   0

  Columns 51 through 55

                   0                   0                   0                   0                   0

  Columns 56 through 60

                   0                   0                   0                   0                   0

  Column 61

                   0


outer_code_BER =

  Columns 1 through 5

   0.120918740878550   0.117333100156390   0.113754271868533   0.110184228504477   0.106625029022010

  Columns 6 through 10

   0.103078846910974   0.099548002978233   0.096034959550922   0.092542353197978   0.089073031956679

  Columns 11 through 15

   0.085630049437032   0.082216693243585   0.078836513027409   0.075493293060842                   0

  Columns 16 through 20

                   0                   0                   0                   0                   0

  Columns 21 through 25

                   0                   0                   0                   0                   0

  Columns 26 through 30

                   0                   0                   0                   0                   0

  Columns 31 through 35

                   0                   0                   0                   0                   0

  Columns 36 through 40

                   0                   0                   0                   0                   0

  Columns 41 through 45

                   0                   0                   0                   0                   0

  Columns 46 through 50

                   0                   0                   0                   0                   0

  Columns 51 through 55

                   0                   0                   0                   0                   0

  Columns 56 through 60

                   0                   0                   0                   0                   0

  Column 61

                   0


inner_code_BER =

  Columns 1 through 5

   0.120918740878549   0.117333100156390   0.113754271868533   0.110184228504477   0.106625029022009

  Columns 6 through 10

   0.103078846910973   0.099548002978232   0.096034959550923   0.092542353197978   0.089073031956679

  Columns 11 through 15

   0.085630049437032   0.082216693243584   0.078836513027406   0.075493293060834   0.072191051870160

  Columns 16 through 20

                   0                   0                   0                   0                   0

  Columns 21 through 25

                   0                   0                   0                   0                   0

  Columns 26 through 30

                   0                   0                   0                   0                   0

  Columns 31 through 35

                   0                   0                   0                   0                   0

  Columns 36 through 40

                   0                   0                   0                   0                   0

  Columns 41 through 45

                   0                   0                   0                   0                   0

  Columns 46 through 50

                   0                   0                   0                   0                   0

  Columns 51 through 55

                   0                   0                   0                   0                   0

  Columns 56 through 60

                   0                   0                   0                   0                   0

  Column 61

                   0


outer_code_BER =

  Columns 1 through 5

   0.120918740878550   0.117333100156390   0.113754271868533   0.110184228504477   0.106625029022010

  Columns 6 through 10

   0.103078846910974   0.099548002978233   0.096034959550922   0.092542353197978   0.089073031956679

  Columns 11 through 15

   0.085630049437032   0.082216693243585   0.078836513027409   0.075493293060842   0.072191051870185

  Columns 16 through 20

                   0                   0                   0                   0                   0

  Columns 21 through 25

                   0                   0                   0                   0                   0

  Columns 26 through 30

                   0                   0                   0                   0                   0

  Columns 31 through 35

                   0                   0                   0                   0                   0

  Columns 36 through 40

                   0                   0                   0                   0                   0

  Columns 41 through 45

                   0                   0                   0                   0                   0

  Columns 46 through 50

                   0                   0                   0                   0                   0

  Columns 51 through 55

                   0                   0                   0                   0                   0

  Columns 56 through 60

                   0                   0                   0                   0                   0

  Column 61

                   0


inner_code_BER =

  Columns 1 through 5

   0.120918740878549   0.117333100156390   0.113754271868533   0.110184228504477   0.106625029022009

  Columns 6 through 10

   0.103078846910973   0.099548002978232   0.096034959550923   0.092542353197978   0.089073031956679

  Columns 11 through 15

   0.085630049437032   0.082216693243584   0.078836513027406   0.075493293060834   0.072191051870160

  Columns 16 through 20

   0.068934031073347                   0                   0                   0                   0

  Columns 21 through 25

                   0                   0                   0                   0                   0

  Columns 26 through 30

                   0                   0                   0                   0                   0

  Columns 31 through 35

                   0                   0                   0                   0                   0

  Columns 36 through 40

                   0                   0                   0                   0                   0

  Columns 41 through 45

                   0                   0                   0                   0                   0

  Columns 46 through 50

                   0                   0                   0                   0                   0

  Columns 51 through 55

                   0                   0                   0                   0                   0

  Columns 56 through 60

                   0                   0                   0                   0                   0

  Column 61

                   0


outer_code_BER =

  Columns 1 through 5

   0.120918740878550   0.117333100156390   0.113754271868533   0.110184228504477   0.106625029022010

  Columns 6 through 10

   0.103078846910974   0.099548002978233   0.096034959550922   0.092542353197978   0.089073031956679

  Columns 11 through 15

   0.085630049437032   0.082216693243585   0.078836513027409   0.075493293060842   0.072191051870185

  Columns 16 through 20

   0.068934031073433                   0                   0                   0                   0

  Columns 21 through 25

                   0                   0                   0                   0                   0

  Columns 26 through 30

                   0                   0                   0                   0                   0

  Columns 31 through 35

                   0                   0                   0                   0                   0

  Columns 36 through 40

                   0                   0                   0                   0                   0

  Columns 41 through 45

                   0                   0                   0                   0                   0

  Columns 46 through 50

                   0                   0                   0                   0                   0

  Columns 51 through 55

                   0                   0                   0                   0                   0

  Columns 56 through 60

                   0                   0                   0                   0                   0

  Column 61

                   0


inner_code_BER =

  Columns 1 through 5

   0.120918740878549   0.117333100156390   0.113754271868533   0.110184228504477   0.106625029022009

  Columns 6 through 10

   0.103078846910973   0.099548002978232   0.096034959550923   0.092542353197978   0.089073031956679

  Columns 11 through 15

   0.085630049437032   0.082216693243584   0.078836513027406   0.075493293060834   0.072191051870160

  Columns 16 through 20

   0.068934031073347   0.065726605684552                   0                   0                   0

  Columns 21 through 25

                   0                   0                   0                   0                   0

  Columns 26 through 30

                   0                   0                   0                   0                   0

  Columns 31 through 35

                   0                   0                   0                   0                   0

  Columns 36 through 40

                   0                   0                   0                   0                   0

  Columns 41 through 45

                   0                   0                   0                   0                   0

  Columns 46 through 50

                   0                   0                   0                   0                   0

  Columns 51 through 55

                   0                   0                   0                   0                   0

  Columns 56 through 60

                   0                   0                   0                   0                   0

  Column 61

                   0


outer_code_BER =

  Columns 1 through 5

   0.120918740878550   0.117333100156390   0.113754271868533   0.110184228504477   0.106625029022010

  Columns 6 through 10

   0.103078846910974   0.099548002978233   0.096034959550922   0.092542353197978   0.089073031956679

  Columns 11 through 15

   0.085630049437032   0.082216693243585   0.078836513027409   0.075493293060842   0.072191051870185

  Columns 16 through 20

   0.068934031073433   0.065726605684831                   0                   0                   0

  Columns 21 through 25

                   0                   0                   0                   0                   0

  Columns 26 through 30

                   0                   0                   0                   0                   0

  Columns 31 through 35

                   0                   0                   0                   0                   0

  Columns 36 through 40

                   0                   0                   0                   0                   0

  Columns 41 through 45

                   0                   0                   0                   0                   0

  Columns 46 through 50

                   0                   0                   0                   0                   0

  Columns 51 through 55

                   0                   0                   0                   0                   0

  Columns 56 through 60

                   0                   0                   0                   0                   0

  Column 61

                   0


inner_code_BER =

  Columns 1 through 5

   0.120918740878549   0.117333100156390   0.113754271868533   0.110184228504477   0.106625029022009

  Columns 6 through 10

   0.103078846910973   0.099548002978232   0.096034959550923   0.092542353197978   0.089073031956679

  Columns 11 through 15

   0.085630049437032   0.082216693243584   0.078836513027406   0.075493293060834   0.072191051870160

  Columns 16 through 20

   0.068934031073347   0.065726605684552   0.062573247807639                   0                   0

  Columns 21 through 25

                   0                   0                   0                   0                   0

  Columns 26 through 30

                   0                   0                   0                   0                   0

  Columns 31 through 35

                   0                   0                   0                   0                   0

  Columns 36 through 40

                   0                   0                   0                   0                   0

  Columns 41 through 45

                   0                   0                   0                   0                   0

  Columns 46 through 50

                   0                   0                   0                   0                   0

  Columns 51 through 55

                   0                   0                   0                   0                   0

  Columns 56 through 60

                   0                   0                   0                   0                   0

  Column 61

                   0


outer_code_BER =

  Columns 1 through 5

   0.120918740878550   0.117333100156390   0.113754271868533   0.110184228504477   0.106625029022010

  Columns 6 through 10

   0.103078846910974   0.099548002978233   0.096034959550922   0.092542353197978   0.089073031956679

  Columns 11 through 15

   0.085630049437032   0.082216693243585   0.078836513027409   0.075493293060842   0.072191051870185

  Columns 16 through 20

   0.068934031073433   0.065726605684831   0.062573247808524                   0                   0

  Columns 21 through 25

                   0                   0                   0                   0                   0

  Columns 26 through 30

                   0                   0                   0                   0                   0

  Columns 31 through 35

                   0                   0                   0                   0                   0

  Columns 36 through 40

                   0                   0                   0                   0                   0

  Columns 41 through 45

                   0                   0                   0                   0                   0

  Columns 46 through 50

                   0                   0                   0                   0                   0

  Columns 51 through 55

                   0                   0                   0                   0                   0

  Columns 56 through 60

                   0                   0                   0                   0                   0

  Column 61

                   0


inner_code_BER =

  Columns 1 through 5

   0.120918740878549   0.117333100156390   0.113754271868533   0.110184228504477   0.106625029022009

  Columns 6 through 10

   0.103078846910973   0.099548002978232   0.096034959550923   0.092542353197978   0.089073031956679

  Columns 11 through 15

   0.085630049437032   0.082216693243584   0.078836513027406   0.075493293060834   0.072191051870160

  Columns 16 through 20

   0.068934031073347   0.065726605684552   0.062573247807639   0.059478392139713                   0

  Columns 21 through 25

                   0                   0                   0                   0                   0

  Columns 26 through 30

                   0                   0                   0                   0                   0

  Columns 31 through 35

                   0                   0                   0                   0                   0

  Columns 36 through 40

                   0                   0                   0                   0                   0

  Columns 41 through 45

                   0                   0                   0                   0                   0

  Columns 46 through 50

                   0                   0                   0                   0                   0

  Columns 51 through 55

                   0                   0                   0                   0                   0

  Columns 56 through 60

                   0                   0                   0                   0                   0

  Column 61

                   0


outer_code_BER =

  Columns 1 through 5

   0.120918740878550   0.117333100156390   0.113754271868533   0.110184228504477   0.106625029022010

  Columns 6 through 10

   0.103078846910974   0.099548002978233   0.096034959550922   0.092542353197978   0.089073031956679

  Columns 11 through 15

   0.085630049437032   0.082216693243585   0.078836513027409   0.075493293060842   0.072191051870185

  Columns 16 through 20

   0.068934031073433   0.065726605684831   0.062573247808524   0.059478392142404                   0

  Columns 21 through 25

                   0                   0                   0                   0                   0

  Columns 26 through 30

                   0                   0                   0                   0                   0

  Columns 31 through 35

                   0                   0                   0                   0                   0

  Columns 36 through 40

                   0                   0                   0                   0                   0

  Columns 41 through 45

                   0                   0                   0                   0                   0

  Columns 46 through 50

                   0                   0                   0                   0                   0

  Columns 51 through 55

                   0                   0                   0                   0                   0

  Columns 56 through 60

                   0                   0                   0                   0                   0

  Column 61

                   0


inner_code_BER =

  Columns 1 through 5

   0.120918740878549   0.117333100156390   0.113754271868533   0.110184228504477   0.106625029022009

  Columns 6 through 10

   0.103078846910973   0.099548002978232   0.096034959550923   0.092542353197978   0.089073031956679

  Columns 11 through 15

   0.085630049437032   0.082216693243584   0.078836513027406   0.075493293060834   0.072191051870160

  Columns 16 through 20

   0.068934031073347   0.065726605684552   0.062573247807639   0.059478392139713   0.056446322609377

  Columns 21 through 25

                   0                   0                   0                   0                   0

  Columns 26 through 30

                   0                   0                   0                   0                   0

  Columns 31 through 35

                   0                   0                   0                   0                   0

  Columns 36 through 40

                   0                   0                   0                   0                   0

  Columns 41 through 45

                   0                   0                   0                   0                   0

  Columns 46 through 50

                   0                   0                   0                   0                   0

  Columns 51 through 55

                   0                   0                   0                   0                   0

  Columns 56 through 60

                   0                   0                   0                   0                   0

  Column 61

                   0


outer_code_BER =

  Columns 1 through 5

   0.120918740878550   0.117333100156390   0.113754271868533   0.110184228504477   0.106625029022010

  Columns 6 through 10

   0.103078846910974   0.099548002978233   0.096034959550922   0.092542353197978   0.089073031956679

  Columns 11 through 15

   0.085630049437032   0.082216693243585   0.078836513027409   0.075493293060842   0.072191051870185

  Columns 16 through 20

   0.068934031073433   0.065726605684831   0.062573247808524   0.059478392142404   0.056446322617231

  Columns 21 through 25

                   0                   0                   0                   0                   0

  Columns 26 through 30

                   0                   0                   0                   0                   0

  Columns 31 through 35

                   0                   0                   0                   0                   0

  Columns 36 through 40

                   0                   0                   0                   0                   0

  Columns 41 through 45

                   0                   0                   0                   0                   0

  Columns 46 through 50

                   0                   0                   0                   0                   0

  Columns 51 through 55

                   0                   0                   0                   0                   0

  Columns 56 through 60

                   0                   0                   0                   0                   0

  Column 61

                   0


inner_code_BER =

  Columns 1 through 5

   0.120918740878549   0.117333100156390   0.113754271868533   0.110184228504477   0.106625029022009

  Columns 6 through 10

   0.103078846910973   0.099548002978232   0.096034959550923   0.092542353197978   0.089073031956679

  Columns 11 through 15

   0.085630049437032   0.082216693243584   0.078836513027406   0.075493293060834   0.072191051870160

  Columns 16 through 20

   0.068934031073347   0.065726605684552   0.062573247807639   0.059478392139713   0.056446322609377

  Columns 21 through 25

   0.053481047676680                   0                   0                   0                   0

  Columns 26 through 30

                   0                   0                   0                   0                   0

  Columns 31 through 35

                   0                   0                   0                   0                   0

  Columns 36 through 40

                   0                   0                   0                   0                   0

  Columns 41 through 45

                   0                   0                   0                   0                   0

  Columns 46 through 50

                   0                   0                   0                   0                   0

  Columns 51 through 55

                   0                   0                   0                   0                   0

  Columns 56 through 60

                   0                   0                   0                   0                   0

  Column 61

                   0


outer_code_BER =

  Columns 1 through 5

   0.120918740878550   0.117333100156390   0.113754271868533   0.110184228504477   0.106625029022010

  Columns 6 through 10

   0.103078846910974   0.099548002978233   0.096034959550922   0.092542353197978   0.089073031956679

  Columns 11 through 15

   0.085630049437032   0.082216693243585   0.078836513027409   0.075493293060842   0.072191051870185

  Columns 16 through 20

   0.068934031073433   0.065726605684831   0.062573247808524   0.059478392142404   0.056446322617231

  Columns 21 through 25

   0.053481047698697                   0                   0                   0                   0

  Columns 26 through 30

                   0                   0                   0                   0                   0

  Columns 31 through 35

                   0                   0                   0                   0                   0

  Columns 36 through 40

                   0                   0                   0                   0                   0

  Columns 41 through 45

                   0                   0                   0                   0                   0

  Columns 46 through 50

                   0                   0                   0                   0                   0

  Columns 51 through 55

                   0                   0                   0                   0                   0

  Columns 56 through 60

                   0                   0                   0                   0                   0

  Column 61

                   0


inner_code_BER =

  Columns 1 through 5

   0.120918740878549   0.117333100156390   0.113754271868533   0.110184228504477   0.106625029022009

  Columns 6 through 10

   0.103078846910973   0.099548002978232   0.096034959550923   0.092542353197978   0.089073031956679

  Columns 11 through 15

   0.085630049437032   0.082216693243584   0.078836513027406   0.075493293060834   0.072191051870160

  Columns 16 through 20

   0.068934031073347   0.065726605684552   0.062573247807639   0.059478392139713   0.056446322609377

  Columns 21 through 25

   0.053481047676680   0.050586118992641                   0                   0                   0

  Columns 26 through 30

                   0                   0                   0                   0                   0

  Columns 31 through 35

                   0                   0                   0                   0                   0

  Columns 36 through 40

                   0                   0                   0                   0                   0

  Columns 41 through 45

                   0                   0                   0                   0                   0

  Columns 46 through 50

                   0                   0                   0                   0                   0

  Columns 51 through 55

                   0                   0                   0                   0                   0

  Columns 56 through 60

                   0                   0                   0                   0                   0

  Column 61

                   0


outer_code_BER =

  Columns 1 through 5

   0.120918740878550   0.117333100156390   0.113754271868533   0.110184228504477   0.106625029022010

  Columns 6 through 10

   0.103078846910974   0.099548002978233   0.096034959550922   0.092542353197978   0.089073031956679

  Columns 11 through 15

   0.085630049437032   0.082216693243585   0.078836513027409   0.075493293060842   0.072191051870185

  Columns 16 through 20

   0.068934031073433   0.065726605684831   0.062573247808524   0.059478392142404   0.056446322617231

  Columns 21 through 25

   0.053481047698697   0.050586119051861                   0                   0                   0

  Columns 26 through 30

                   0                   0                   0                   0                   0

  Columns 31 through 35

                   0                   0                   0                   0                   0

  Columns 36 through 40

                   0                   0                   0                   0                   0

  Columns 41 through 45

                   0                   0                   0                   0                   0

  Columns 46 through 50

                   0                   0                   0                   0                   0

  Columns 51 through 55

                   0                   0                   0                   0                   0

  Columns 56 through 60

                   0                   0                   0                   0                   0

  Column 61

                   0


inner_code_BER =

  Columns 1 through 5

   0.120918740878549   0.117333100156390   0.113754271868533   0.110184228504477   0.106625029022009

  Columns 6 through 10

   0.103078846910973   0.099548002978232   0.096034959550923   0.092542353197978   0.089073031956679

  Columns 11 through 15

   0.085630049437032   0.082216693243584   0.078836513027406   0.075493293060834   0.072191051870160

  Columns 16 through 20

   0.068934031073347   0.065726605684552   0.062573247807639   0.059478392139713   0.056446322609377

  Columns 21 through 25

   0.053481047676680   0.050586118992641   0.047764498336559                   0                   0

  Columns 26 through 30

                   0                   0                   0                   0                   0

  Columns 31 through 35

                   0                   0                   0                   0                   0

  Columns 36 through 40

                   0                   0                   0                   0                   0

  Columns 41 through 45

                   0                   0                   0                   0                   0

  Columns 46 through 50

                   0                   0                   0                   0                   0

  Columns 51 through 55

                   0                   0                   0                   0                   0

  Columns 56 through 60

                   0                   0                   0                   0                   0

  Column 61

                   0


outer_code_BER =

  Columns 1 through 5

   0.120918740878550   0.117333100156390   0.113754271868533   0.110184228504477   0.106625029022010

  Columns 6 through 10

   0.103078846910974   0.099548002978233   0.096034959550922   0.092542353197978   0.089073031956679

  Columns 11 through 15

   0.085630049437032   0.082216693243585   0.078836513027409   0.075493293060842   0.072191051870185

  Columns 16 through 20

   0.068934031073433   0.065726605684831   0.062573247808524   0.059478392142404   0.056446322617231

  Columns 21 through 25

   0.053481047698697   0.050586119051861   0.047764498489414                   0                   0

  Columns 26 through 30

                   0                   0                   0                   0                   0

  Columns 31 through 35

                   0                   0                   0                   0                   0

  Columns 36 through 40

                   0                   0                   0                   0                   0

  Columns 41 through 45

                   0                   0                   0                   0                   0

  Columns 46 through 50

                   0                   0                   0                   0                   0

  Columns 51 through 55

                   0                   0                   0                   0                   0

  Columns 56 through 60

                   0                   0                   0                   0                   0

  Column 61

                   0


inner_code_BER =

  Columns 1 through 5

   0.120918740878549   0.117333100156390   0.113754271868533   0.110184228504477   0.106625029022009

  Columns 6 through 10

   0.103078846910973   0.099548002978232   0.096034959550923   0.092542353197978   0.089073031956679

  Columns 11 through 15

   0.085630049437032   0.082216693243584   0.078836513027406   0.075493293060834   0.072191051870160

  Columns 16 through 20

   0.068934031073347   0.065726605684552   0.062573247807639   0.059478392139713   0.056446322609377

  Columns 21 through 25

   0.053481047676680   0.050586118992641   0.047764498336559   0.045018448293553                   0

  Columns 26 through 30

                   0                   0                   0                   0                   0

  Columns 31 through 35

                   0                   0                   0                   0                   0

  Columns 36 through 40

                   0                   0                   0                   0                   0

  Columns 41 through 45

                   0                   0                   0                   0                   0

  Columns 46 through 50

                   0                   0                   0                   0                   0

  Columns 51 through 55

                   0                   0                   0                   0                   0

  Columns 56 through 60

                   0                   0                   0                   0                   0

  Column 61

                   0


outer_code_BER =

  Columns 1 through 5

   0.120918740878550   0.117333100156390   0.113754271868533   0.110184228504477   0.106625029022010

  Columns 6 through 10

   0.103078846910974   0.099548002978233   0.096034959550922   0.092542353197978   0.089073031956679

  Columns 11 through 15

   0.085630049437032   0.082216693243585   0.078836513027409   0.075493293060842   0.072191051870185

  Columns 16 through 20

   0.068934031073433   0.065726605684831   0.062573247808524   0.059478392142404   0.056446322617231

  Columns 21 through 25

   0.053481047698697   0.050586119051861   0.047764498489414   0.045018448672097                   0

  Columns 26 through 30

                   0                   0                   0                   0                   0

  Columns 31 through 35

                   0                   0                   0                   0                   0

  Columns 36 through 40

                   0                   0                   0                   0                   0

  Columns 41 through 45

                   0                   0                   0                   0                   0

  Columns 46 through 50

                   0                   0                   0                   0                   0

  Columns 51 through 55

                   0                   0                   0                   0                   0

  Columns 56 through 60

                   0                   0                   0                   0                   0

  Column 61

                   0


inner_code_BER =

  Columns 1 through 5

   0.120918740878549   0.117333100156390   0.113754271868533   0.110184228504477   0.106625029022009

  Columns 6 through 10

   0.103078846910973   0.099548002978232   0.096034959550923   0.092542353197978   0.089073031956679

  Columns 11 through 15

   0.085630049437032   0.082216693243584   0.078836513027406   0.075493293060834   0.072191051870160

  Columns 16 through 20

   0.068934031073347   0.065726605684552   0.062573247807639   0.059478392139713   0.056446322609377

  Columns 21 through 25

   0.053481047676680   0.050586118992641   0.047764498336559   0.045018448293553   0.042349402986237

  Columns 26 through 30

                   0                   0                   0                   0                   0

  Columns 31 through 35

                   0                   0                   0                   0                   0

  Columns 36 through 40

                   0                   0                   0                   0                   0

  Columns 41 through 45

                   0                   0                   0                   0                   0

  Columns 46 through 50

                   0                   0                   0                   0                   0

  Columns 51 through 55

                   0                   0                   0                   0                   0

  Columns 56 through 60

                   0                   0                   0                   0                   0

  Column 61

                   0


outer_code_BER =

  Columns 1 through 5

   0.120918740878550   0.117333100156390   0.113754271868533   0.110184228504477   0.106625029022010

  Columns 6 through 10

   0.103078846910974   0.099548002978233   0.096034959550922   0.092542353197978   0.089073031956679

  Columns 11 through 15

   0.085630049437032   0.082216693243585   0.078836513027409   0.075493293060842   0.072191051870185

  Columns 16 through 20

   0.068934031073433   0.065726605684831   0.062573247808524   0.059478392142404   0.056446322617231

  Columns 21 through 25

   0.053481047698697   0.050586119051861   0.047764498489414   0.045018448672097   0.042349403885782

  Columns 26 through 30

                   0                   0                   0                   0                   0

  Columns 31 through 35

                   0                   0                   0                   0                   0

  Columns 36 through 40

                   0                   0                   0                   0                   0

  Columns 41 through 45

                   0                   0                   0                   0                   0

  Columns 46 through 50

                   0                   0                   0                   0                   0

  Columns 51 through 55

                   0                   0                   0                   0                   0

  Columns 56 through 60

                   0                   0                   0                   0                   0

  Column 61

                   0


inner_code_BER =

  Columns 1 through 5

   0.120918740878549   0.117333100156390   0.113754271868533   0.110184228504477   0.106625029022009

  Columns 6 through 10

   0.103078846910973   0.099548002978232   0.096034959550923   0.092542353197978   0.089073031956679

  Columns 11 through 15

   0.085630049437032   0.082216693243584   0.078836513027406   0.075493293060834   0.072191051870160

  Columns 16 through 20

   0.068934031073347   0.065726605684552   0.062573247807639   0.059478392139713   0.056446322609377

  Columns 21 through 25

   0.053481047676680   0.050586118992641   0.047764498336559   0.045018448293553   0.042349402986237

  Columns 26 through 30

   0.039757928982243                   0                   0                   0                   0

  Columns 31 through 35

                   0                   0                   0                   0                   0

  Columns 36 through 40

                   0                   0                   0                   0                   0

  Columns 41 through 45

                   0                   0                   0                   0                   0

  Columns 46 through 50

                   0                   0                   0                   0                   0

  Columns 51 through 55

                   0                   0                   0                   0                   0

  Columns 56 through 60

                   0                   0                   0                   0                   0

  Column 61

                   0


outer_code_BER =

  Columns 1 through 5

   0.120918740878550   0.117333100156390   0.113754271868533   0.110184228504477   0.106625029022010

  Columns 6 through 10

   0.103078846910974   0.099548002978233   0.096034959550922   0.092542353197978   0.089073031956679

  Columns 11 through 15

   0.085630049437032   0.082216693243585   0.078836513027409   0.075493293060842   0.072191051870185

  Columns 16 through 20

   0.068934031073433   0.065726605684831   0.062573247808524   0.059478392142404   0.056446322617231

  Columns 21 through 25

   0.053481047698697   0.050586119051861   0.047764498489414   0.045018448672097   0.042349403885782

  Columns 26 through 30

   0.039757931033612                   0                   0                   0                   0

  Columns 31 through 35

                   0                   0                   0                   0                   0

  Columns 36 through 40

                   0                   0                   0                   0                   0

  Columns 41 through 45

                   0                   0                   0                   0                   0

  Columns 46 through 50

                   0                   0                   0                   0                   0

  Columns 51 through 55

                   0                   0                   0                   0                   0

  Columns 56 through 60

                   0                   0                   0                   0                   0

  Column 61

                   0


inner_code_BER =

  Columns 1 through 5

   0.120918740878549   0.117333100156390   0.113754271868533   0.110184228504477   0.106625029022009

  Columns 6 through 10

   0.103078846910973   0.099548002978232   0.096034959550923   0.092542353197978   0.089073031956679

  Columns 11 through 15

   0.085630049437032   0.082216693243584   0.078836513027406   0.075493293060834   0.072191051870160

  Columns 16 through 20

   0.068934031073347   0.065726605684552   0.062573247807639   0.059478392139713   0.056446322609377

  Columns 21 through 25

   0.053481047676680   0.050586118992641   0.047764498336559   0.045018448293553   0.042349402986237

  Columns 26 through 30

   0.039757928982243   0.037243744405979                   0                   0                   0

  Columns 31 through 35

                   0                   0                   0                   0                   0

  Columns 36 through 40

                   0                   0                   0                   0                   0

  Columns 41 through 45

                   0                   0                   0                   0                   0

  Columns 46 through 50

                   0                   0                   0                   0                   0

  Columns 51 through 55

                   0                   0                   0                   0                   0

  Columns 56 through 60

                   0                   0                   0                   0                   0

  Column 61

                   0


outer_code_BER =

  Columns 1 through 5

   0.120918740878550   0.117333100156390   0.113754271868533   0.110184228504477   0.106625029022010

  Columns 6 through 10

   0.103078846910974   0.099548002978233   0.096034959550922   0.092542353197978   0.089073031956679

  Columns 11 through 15

   0.085630049437032   0.082216693243585   0.078836513027409   0.075493293060842   0.072191051870185

  Columns 16 through 20

   0.068934031073433   0.065726605684831   0.062573247808524   0.059478392142404   0.056446322617231

  Columns 21 through 25

   0.053481047698697   0.050586119051861   0.047764498489414   0.045018448672097   0.042349403885782

  Columns 26 through 30

   0.039757931033612   0.037243748895336                   0                   0                   0

  Columns 31 through 35

                   0                   0                   0                   0                   0

  Columns 36 through 40

                   0                   0                   0                   0                   0

  Columns 41 through 45

                   0                   0                   0                   0                   0

  Columns 46 through 50

                   0                   0                   0                   0                   0

  Columns 51 through 55

                   0                   0                   0                   0                   0

  Columns 56 through 60

                   0                   0                   0                   0                   0

  Column 61

                   0


inner_code_BER =

  Columns 1 through 5

   0.120918740878549   0.117333100156390   0.113754271868533   0.110184228504477   0.106625029022009

  Columns 6 through 10

   0.103078846910973   0.099548002978232   0.096034959550923   0.092542353197978   0.089073031956679

  Columns 11 through 15

   0.085630049437032   0.082216693243584   0.078836513027406   0.075493293060834   0.072191051870160

  Columns 16 through 20

   0.068934031073347   0.065726605684552   0.062573247807639   0.059478392139713   0.056446322609377

  Columns 21 through 25

   0.053481047676680   0.050586118992641   0.047764498336559   0.045018448293553   0.042349402986237

  Columns 26 through 30

   0.039757928982243   0.037243744405979   0.034805729701538                   0                   0

  Columns 31 through 35

                   0                   0                   0                   0                   0

  Columns 36 through 40

                   0                   0                   0                   0                   0

  Columns 41 through 45

                   0                   0                   0                   0                   0

  Columns 46 through 50

                   0                   0                   0                   0                   0

  Columns 51 through 55

                   0                   0                   0                   0                   0

  Columns 56 through 60

                   0                   0                   0                   0                   0

  Column 61

                   0


outer_code_BER =

  Columns 1 through 5

   0.120918740878550   0.117333100156390   0.113754271868533   0.110184228504477   0.106625029022010

  Columns 6 through 10

   0.103078846910974   0.099548002978233   0.096034959550922   0.092542353197978   0.089073031956679

  Columns 11 through 15

   0.085630049437032   0.082216693243585   0.078836513027409   0.075493293060842   0.072191051870185

  Columns 16 through 20

   0.068934031073433   0.065726605684831   0.062573247808524   0.059478392142404   0.056446322617231

  Columns 21 through 25

   0.053481047698697   0.050586119051861   0.047764498489414   0.045018448672097   0.042349403885782

  Columns 26 through 30

   0.039757931033612   0.037243748895336   0.034805739127685                   0                   0

  Columns 31 through 35

                   0                   0                   0                   0                   0

  Columns 36 through 40

                   0                   0                   0                   0                   0

  Columns 41 through 45

                   0                   0                   0                   0                   0

  Columns 46 through 50

                   0                   0                   0                   0                   0

  Columns 51 through 55

                   0                   0                   0                   0                   0

  Columns 56 through 60

                   0                   0                   0                   0                   0

  Column 61

                   0


inner_code_BER =

  Columns 1 through 5

   0.120918740878549   0.117333100156390   0.113754271868533   0.110184228504477   0.106625029022009

  Columns 6 through 10

   0.103078846910973   0.099548002978232   0.096034959550923   0.092542353197978   0.089073031956679

  Columns 11 through 15

   0.085630049437032   0.082216693243584   0.078836513027406   0.075493293060834   0.072191051870160

  Columns 16 through 20

   0.068934031073347   0.065726605684552   0.062573247807639   0.059478392139713   0.056446322609377

  Columns 21 through 25

   0.053481047676680   0.050586118992641   0.047764498336559   0.045018448293553   0.042349402986237

  Columns 26 through 30

   0.039757928982243   0.037243744405979   0.034805729701538   0.032442087767753                   0

  Columns 31 through 35

                   0                   0                   0                   0                   0

  Columns 36 through 40

                   0                   0                   0                   0                   0

  Columns 41 through 45

                   0                   0                   0                   0                   0

  Columns 46 through 50

                   0                   0                   0                   0                   0

  Columns 51 through 55

                   0                   0                   0                   0                   0

  Columns 56 through 60

                   0                   0                   0                   0                   0

  Column 61

                   0


outer_code_BER =

  Columns 1 through 5

   0.120918740878550   0.117333100156390   0.113754271868533   0.110184228504477   0.106625029022010

  Columns 6 through 10

   0.103078846910974   0.099548002978233   0.096034959550922   0.092542353197978   0.089073031956679

  Columns 11 through 15

   0.085630049437032   0.082216693243585   0.078836513027409   0.075493293060842   0.072191051870185

  Columns 16 through 20

   0.068934031073433   0.065726605684831   0.062573247808524   0.059478392142404   0.056446322617231

  Columns 21 through 25

   0.053481047698697   0.050586119051861   0.047764498489414   0.045018448672097   0.042349403885782

  Columns 26 through 30

   0.039757931033612   0.037243748895336   0.034805739127685   0.032442106740395                   0

  Columns 31 through 35

                   0                   0                   0                   0                   0

  Columns 36 through 40

                   0                   0                   0                   0                   0

  Columns 41 through 45

                   0                   0                   0                   0                   0

  Columns 46 through 50

                   0                   0                   0                   0                   0

  Columns 51 through 55

                   0                   0                   0                   0                   0

  Columns 56 through 60

                   0                   0                   0                   0                   0

  Column 61

                   0


inner_code_BER =

  Columns 1 through 5

   0.120918740878549   0.117333100156390   0.113754271868533   0.110184228504477   0.106625029022009

  Columns 6 through 10

   0.103078846910973   0.099548002978232   0.096034959550923   0.092542353197978   0.089073031956679

  Columns 11 through 15

   0.085630049437032   0.082216693243584   0.078836513027406   0.075493293060834   0.072191051870160

  Columns 16 through 20

   0.068934031073347   0.065726605684552   0.062573247807639   0.059478392139713   0.056446322609377

  Columns 21 through 25

   0.053481047676680   0.050586118992641   0.047764498336559   0.045018448293553   0.042349402986237

  Columns 26 through 30

   0.039757928982243   0.037243744405979   0.034805729701538   0.032442087767753   0.030150468811788

  Columns 31 through 35

                   0                   0                   0                   0                   0

  Columns 36 through 40

                   0                   0                   0                   0                   0

  Columns 41 through 45

                   0                   0                   0                   0                   0

  Columns 46 through 50

                   0                   0                   0                   0                   0

  Columns 51 through 55

                   0                   0                   0                   0                   0

  Columns 56 through 60

                   0                   0                   0                   0                   0

  Column 61

                   0


outer_code_BER =

  Columns 1 through 5

   0.120918740878550   0.117333100156390   0.113754271868533   0.110184228504477   0.106625029022010

  Columns 6 through 10

   0.103078846910974   0.099548002978233   0.096034959550922   0.092542353197978   0.089073031956679

  Columns 11 through 15

   0.085630049437032   0.082216693243585   0.078836513027409   0.075493293060842   0.072191051870185

  Columns 16 through 20

   0.068934031073433   0.065726605684831   0.062573247808524   0.059478392142404   0.056446322617231

  Columns 21 through 25

   0.053481047698697   0.050586119051861   0.047764498489414   0.045018448672097   0.042349403885782

  Columns 26 through 30

   0.039757931033612   0.037243748895336   0.034805739127685   0.032442106740395   0.030150505347679

  Columns 31 through 35

                   0                   0                   0                   0                   0

  Columns 36 through 40

                   0                   0                   0                   0                   0

  Columns 41 through 45

                   0                   0                   0                   0                   0

  Columns 46 through 50

                   0                   0                   0                   0                   0

  Columns 51 through 55

                   0                   0                   0                   0                   0

  Columns 56 through 60

                   0                   0                   0                   0                   0

  Column 61

                   0


inner_code_BER =

  Columns 1 through 5

   0.120918740878549   0.117333100156390   0.113754271868533   0.110184228504477   0.106625029022009

  Columns 6 through 10

   0.103078846910973   0.099548002978232   0.096034959550923   0.092542353197978   0.089073031956679

  Columns 11 through 15

   0.085630049437032   0.082216693243584   0.078836513027406   0.075493293060834   0.072191051870160

  Columns 16 through 20

   0.068934031073347   0.065726605684552   0.062573247807639   0.059478392139713   0.056446322609377

  Columns 21 through 25

   0.053481047676680   0.050586118992641   0.047764498336559   0.045018448293553   0.042349402986237

  Columns 26 through 30

   0.039757928982243   0.037243744405979   0.034805729701538   0.032442087767753   0.030150468811788

  Columns 31 through 35

   0.027928254091492                   0                   0                   0                   0

  Columns 36 through 40

                   0                   0                   0                   0                   0

  Columns 41 through 45

                   0                   0                   0                   0                   0

  Columns 46 through 50

                   0                   0                   0                   0                   0

  Columns 51 through 55

                   0                   0                   0                   0                   0

  Columns 56 through 60

                   0                   0                   0                   0                   0

  Column 61

                   0


outer_code_BER =

  Columns 1 through 5

   0.120918740878550   0.117333100156390   0.113754271868533   0.110184228504477   0.106625029022010

  Columns 6 through 10

   0.103078846910974   0.099548002978233   0.096034959550922   0.092542353197978   0.089073031956679

  Columns 11 through 15

   0.085630049437032   0.082216693243585   0.078836513027409   0.075493293060842   0.072191051870185

  Columns 16 through 20

   0.068934031073433   0.065726605684831   0.062573247808524   0.059478392142404   0.056446322617231

  Columns 21 through 25

   0.053481047698697   0.050586119051861   0.047764498489414   0.045018448672097   0.042349403885782

  Columns 26 through 30

   0.039757931033612   0.037243748895336   0.034805739127685   0.032442106740395   0.030150505347679

  Columns 31 through 35

   0.027928321133248                   0                   0                   0                   0

  Columns 36 through 40

                   0                   0                   0                   0                   0

  Columns 41 through 45

                   0                   0                   0                   0                   0

  Columns 46 through 50

                   0                   0                   0                   0                   0

  Columns 51 through 55

                   0                   0                   0                   0                   0

  Columns 56 through 60

                   0                   0                   0                   0                   0

  Column 61

                   0


inner_code_BER =

  Columns 1 through 5

   0.120918740878549   0.117333100156390   0.113754271868533   0.110184228504477   0.106625029022009

  Columns 6 through 10

   0.103078846910973   0.099548002978232   0.096034959550923   0.092542353197978   0.089073031956679

  Columns 11 through 15

   0.085630049437032   0.082216693243584   0.078836513027406   0.075493293060834   0.072191051870160

  Columns 16 through 20

   0.068934031073347   0.065726605684552   0.062573247807639   0.059478392139713   0.056446322609377

  Columns 21 through 25

   0.053481047676680   0.050586118992641   0.047764498336559   0.045018448293553   0.042349402986237

  Columns 26 through 30

   0.039757928982243   0.037243744405979   0.034805729701538   0.032442087767753   0.030150468811788

  Columns 31 through 35

   0.027928254091492   0.025772854547932                   0                   0                   0

  Columns 36 through 40

                   0                   0                   0                   0                   0

  Columns 41 through 45

                   0                   0                   0                   0                   0

  Columns 46 through 50

                   0                   0                   0                   0                   0

  Columns 51 through 55

                   0                   0                   0                   0                   0

  Columns 56 through 60

                   0                   0                   0                   0                   0

  Column 61

                   0


outer_code_BER =

  Columns 1 through 5

   0.120918740878550   0.117333100156390   0.113754271868533   0.110184228504477   0.106625029022010

  Columns 6 through 10

   0.103078846910974   0.099548002978233   0.096034959550922   0.092542353197978   0.089073031956679

  Columns 11 through 15

   0.085630049437032   0.082216693243585   0.078836513027409   0.075493293060842   0.072191051870185

  Columns 16 through 20

   0.068934031073433   0.065726605684831   0.062573247808524   0.059478392142404   0.056446322617231

  Columns 21 through 25

   0.053481047698697   0.050586119051861   0.047764498489414   0.045018448672097   0.042349403885782

  Columns 26 through 30

   0.039757931033612   0.037243748895336   0.034805739127685   0.032442106740395   0.030150505347679

  Columns 31 through 35

   0.027928321133248   0.025772970807092                   0                   0                   0

  Columns 36 through 40

                   0                   0                   0                   0                   0

  Columns 41 through 45

                   0                   0                   0                   0                   0

  Columns 46 through 50

                   0                   0                   0                   0                   0

  Columns 51 through 55

                   0                   0                   0                   0                   0

  Columns 56 through 60

                   0                   0                   0                   0                   0

  Column 61

                   0


inner_code_BER =

  Columns 1 through 5

   0.120918740878549   0.117333100156390   0.113754271868533   0.110184228504477   0.106625029022009

  Columns 6 through 10

   0.103078846910973   0.099548002978232   0.096034959550923   0.092542353197978   0.089073031956679

  Columns 11 through 15

   0.085630049437032   0.082216693243584   0.078836513027406   0.075493293060834   0.072191051870160

  Columns 16 through 20

   0.068934031073347   0.065726605684552   0.062573247807639   0.059478392139713   0.056446322609377

  Columns 21 through 25

   0.053481047676680   0.050586118992641   0.047764498336559   0.045018448293553   0.042349402986237

  Columns 26 through 30

   0.039757928982243   0.037243744405979   0.034805729701538   0.032442087767753   0.030150468811788

  Columns 31 through 35

   0.027928254091492   0.025772854547932   0.023682152884994                   0                   0

  Columns 36 through 40

                   0                   0                   0                   0                   0

  Columns 41 through 45

                   0                   0                   0                   0                   0

  Columns 46 through 50

                   0                   0                   0                   0                   0

  Columns 51 through 55

                   0                   0                   0                   0                   0

  Columns 56 through 60

                   0                   0                   0                   0                   0

  Column 61

                   0


outer_code_BER =

  Columns 1 through 5

   0.120918740878550   0.117333100156390   0.113754271868533   0.110184228504477   0.106625029022010

  Columns 6 through 10

   0.103078846910974   0.099548002978233   0.096034959550922   0.092542353197978   0.089073031956679

  Columns 11 through 15

   0.085630049437032   0.082216693243585   0.078836513027409   0.075493293060842   0.072191051870185

  Columns 16 through 20

   0.068934031073433   0.065726605684831   0.062573247808524   0.059478392142404   0.056446322617231

  Columns 21 through 25

   0.053481047698697   0.050586119051861   0.047764498489414   0.045018448672097   0.042349403885782

  Columns 26 through 30

   0.039757931033612   0.037243748895336   0.034805739127685   0.032442106740395   0.030150505347679

  Columns 31 through 35

   0.027928321133248   0.025772970807092   0.023682340155398                   0                   0

  Columns 36 through 40

                   0                   0                   0                   0                   0

  Columns 41 through 45

                   0                   0                   0                   0                   0

  Columns 46 through 50

                   0                   0                   0                   0                   0

  Columns 51 through 55

                   0                   0                   0                   0                   0

  Columns 56 through 60

                   0                   0                   0                   0                   0

  Column 61

                   0


inner_code_BER =

  Columns 1 through 5

   0.120918740878549   0.117333100156390   0.113754271868533   0.110184228504477   0.106625029022009

  Columns 6 through 10

   0.103078846910973   0.099548002978232   0.096034959550923   0.092542353197978   0.089073031956679

  Columns 11 through 15

   0.085630049437032   0.082216693243584   0.078836513027406   0.075493293060834   0.072191051870160

  Columns 16 through 20

   0.068934031073347   0.065726605684552   0.062573247807639   0.059478392139713   0.056446322609377

  Columns 21 through 25

   0.053481047676680   0.050586118992641   0.047764498336559   0.045018448293553   0.042349402986237

  Columns 26 through 30

   0.039757928982243   0.037243744405979   0.034805729701538   0.032442087767753   0.030150468811788

  Columns 31 through 35

   0.027928254091492   0.025772854547932   0.023682152884994   0.021655091095922                   0

  Columns 36 through 40

                   0                   0                   0                   0                   0

  Columns 41 through 45

                   0                   0                   0                   0                   0

  Columns 46 through 50

                   0                   0                   0                   0                   0

  Columns 51 through 55

                   0                   0                   0                   0                   0

  Columns 56 through 60

                   0                   0                   0                   0                   0

  Column 61

                   0


outer_code_BER =

  Columns 1 through 5

   0.120918740878550   0.117333100156390   0.113754271868533   0.110184228504477   0.106625029022010

  Columns 6 through 10

   0.103078846910974   0.099548002978233   0.096034959550922   0.092542353197978   0.089073031956679

  Columns 11 through 15

   0.085630049437032   0.082216693243585   0.078836513027409   0.075493293060842   0.072191051870185

  Columns 16 through 20

   0.068934031073433   0.065726605684831   0.062573247808524   0.059478392142404   0.056446322617231

  Columns 21 through 25

   0.053481047698697   0.050586119051861   0.047764498489414   0.045018448672097   0.042349403885782

  Columns 26 through 30

   0.039757931033612   0.037243748895336   0.034805739127685   0.032442106740395   0.030150505347679

  Columns 31 through 35

   0.027928321133248   0.025772970807092   0.023682340155398   0.021655360302959                   0

  Columns 36 through 40

                   0                   0                   0                   0                   0

  Columns 41 through 45

                   0                   0                   0                   0                   0

  Columns 46 through 50

                   0                   0                   0                   0                   0

  Columns 51 through 55

                   0                   0                   0                   0                   0

  Columns 56 through 60

                   0                   0                   0                   0                   0

  Column 61

                   0


inner_code_BER =

  Columns 1 through 5

   0.120918740878549   0.117333100156390   0.113754271868533   0.110184228504477   0.106625029022009

  Columns 6 through 10

   0.103078846910973   0.099548002978232   0.096034959550923   0.092542353197978   0.089073031956679

  Columns 11 through 15

   0.085630049437032   0.082216693243584   0.078836513027406   0.075493293060834   0.072191051870160

  Columns 16 through 20

   0.068934031073347   0.065726605684552   0.062573247807639   0.059478392139713   0.056446322609377

  Columns 21 through 25

   0.053481047676680   0.050586118992641   0.047764498336559   0.045018448293553   0.042349402986237

  Columns 26 through 30

   0.039757928982243   0.037243744405979   0.034805729701538   0.032442087767753   0.030150468811788

  Columns 31 through 35

   0.027928254091492   0.025772854547932   0.023682152884994   0.021655091095922   0.019692456223773

  Columns 36 through 40

                   0                   0                   0                   0                   0

  Columns 41 through 45

                   0                   0                   0                   0                   0

  Columns 46 through 50

                   0                   0                   0                   0                   0

  Columns 51 through 55

                   0                   0                   0                   0                   0

  Columns 56 through 60

                   0                   0                   0                   0                   0

  Column 61

                   0


outer_code_BER =

  Columns 1 through 5

   0.120918740878550   0.117333100156390   0.113754271868533   0.110184228504477   0.106625029022010

  Columns 6 through 10

   0.103078846910974   0.099548002978233   0.096034959550922   0.092542353197978   0.089073031956679

  Columns 11 through 15

   0.085630049437032   0.082216693243585   0.078836513027409   0.075493293060842   0.072191051870185

  Columns 16 through 20

   0.068934031073433   0.065726605684831   0.062573247808524   0.059478392142404   0.056446322617231

  Columns 21 through 25

   0.053481047698697   0.050586119051861   0.047764498489414   0.045018448672097   0.042349403885782

  Columns 26 through 30

   0.039757931033612   0.037243748895336   0.034805739127685   0.032442106740395   0.030150505347679

  Columns 31 through 35

   0.027928321133248   0.025772970807092   0.023682340155398   0.021655360302959   0.019692763129732

  Columns 36 through 40

                   0                   0                   0                   0                   0

  Columns 41 through 45

                   0                   0                   0                   0                   0

  Columns 46 through 50

                   0                   0                   0                   0                   0

  Columns 51 through 55

                   0                   0                   0                   0                   0

  Columns 56 through 60

                   0                   0                   0                   0                   0

  Column 61

                   0


inner_code_BER =

  Columns 1 through 5

   0.120918740878549   0.117333100156390   0.113754271868533   0.110184228504477   0.106625029022009

  Columns 6 through 10

   0.103078846910973   0.099548002978232   0.096034959550923   0.092542353197978   0.089073031956679

  Columns 11 through 15

   0.085630049437032   0.082216693243584   0.078836513027406   0.075493293060834   0.072191051870160

  Columns 16 through 20

   0.068934031073347   0.065726605684552   0.062573247807639   0.059478392139713   0.056446322609377

  Columns 21 through 25

   0.053481047676680   0.050586118992641   0.047764498336559   0.045018448293553   0.042349402986237

  Columns 26 through 30

   0.039757928982243   0.037243744405979   0.034805729701538   0.032442087767753   0.030150468811788

  Columns 31 through 35

   0.027928254091492   0.025772854547932   0.023682152884994   0.021655091095922   0.019692456223773

  Columns 36 through 40

   0.017797874841910                   0                   0                   0                   0

  Columns 41 through 45

                   0                   0                   0                   0                   0

  Columns 46 through 50

                   0                   0                   0                   0                   0

  Columns 51 through 55

                   0                   0                   0                   0                   0

  Columns 56 through 60

                   0                   0                   0                   0                   0

  Column 61

                   0


outer_code_BER =

  Columns 1 through 5

   0.120918740878550   0.117333100156390   0.113754271868533   0.110184228504477   0.106625029022010

  Columns 6 through 10

   0.103078846910974   0.099548002978233   0.096034959550922   0.092542353197978   0.089073031956679

  Columns 11 through 15

   0.085630049437032   0.082216693243585   0.078836513027409   0.075493293060842   0.072191051870185

  Columns 16 through 20

   0.068934031073433   0.065726605684831   0.062573247808524   0.059478392142404   0.056446322617231

  Columns 21 through 25

   0.053481047698697   0.050586119051861   0.047764498489414   0.045018448672097   0.042349403885782

  Columns 26 through 30

   0.039757931033612   0.037243748895336   0.034805739127685   0.032442106740395   0.030150505347679

  Columns 31 through 35

   0.027928321133248   0.025772970807092   0.023682340155398   0.021655360302959   0.019692763129732

  Columns 36 through 40

   0.017798002407345                   0                   0                   0                   0

  Columns 41 through 45

                   0                   0                   0                   0                   0

  Columns 46 through 50

                   0                   0                   0                   0                   0

  Columns 51 through 55

                   0                   0                   0                   0                   0

  Columns 56 through 60

                   0                   0                   0                   0                   0

  Column 61

                   0


inner_code_BER =

  Columns 1 through 5

   0.120918740878549   0.117333100156390   0.113754271868533   0.110184228504477   0.106625029022009

  Columns 6 through 10

   0.103078846910973   0.099548002978232   0.096034959550923   0.092542353197978   0.089073031956679

  Columns 11 through 15

   0.085630049437032   0.082216693243584   0.078836513027406   0.075493293060834   0.072191051870160

  Columns 16 through 20

   0.068934031073347   0.065726605684552   0.062573247807639   0.059478392139713   0.056446322609377

  Columns 21 through 25

   0.053481047676680   0.050586118992641   0.047764498336559   0.045018448293553   0.042349402986237

  Columns 26 through 30

   0.039757928982243   0.037243744405979   0.034805729701538   0.032442087767753   0.030150468811788

  Columns 31 through 35

   0.027928254091492   0.025772854547932   0.023682152884994   0.021655091095922   0.019692456223773

  Columns 36 through 40

   0.017797874841910   0.015978961478685                   0                   0                   0

  Columns 41 through 45

                   0                   0                   0                   0                   0

  Columns 46 through 50

                   0                   0                   0                   0                   0

  Columns 51 through 55

                   0                   0                   0                   0                   0

  Columns 56 through 60

                   0                   0                   0                   0                   0

  Column 61

                   0


outer_code_BER =

  Columns 1 through 5

   0.120918740878550   0.117333100156390   0.113754271868533   0.110184228504477   0.106625029022010

  Columns 6 through 10

   0.103078846910974   0.099548002978233   0.096034959550922   0.092542353197978   0.089073031956679

  Columns 11 through 15

   0.085630049437032   0.082216693243585   0.078836513027409   0.075493293060842   0.072191051870185

  Columns 16 through 20

   0.068934031073433   0.065726605684831   0.062573247808524   0.059478392142404   0.056446322617231

  Columns 21 through 25

   0.053481047698697   0.050586119051861   0.047764498489414   0.045018448672097   0.042349403885782

  Columns 26 through 30

   0.039757931033612   0.037243748895336   0.034805739127685   0.032442106740395   0.030150505347679

  Columns 31 through 35

   0.027928321133248   0.025772970807092   0.023682340155398   0.021655360302959   0.019692763129732

  Columns 36 through 40

   0.017798002407345   0.015978243102014                   0                   0                   0

  Columns 41 through 45

                   0                   0                   0                   0                   0

  Columns 46 through 50

                   0                   0                   0                   0                   0

  Columns 51 through 55

                   0                   0                   0                   0                   0

  Columns 56 through 60

                   0                   0                   0                   0                   0

  Column 61

                   0


inner_code_BER =

  Columns 1 through 5

   0.120918740878549   0.117333100156390   0.113754271868533   0.110184228504477   0.106625029022009

  Columns 6 through 10

   0.103078846910973   0.099548002978232   0.096034959550923   0.092542353197978   0.089073031956679

  Columns 11 through 15

   0.085630049437032   0.082216693243584   0.078836513027406   0.075493293060834   0.072191051870160

  Columns 16 through 20

   0.068934031073347   0.065726605684552   0.062573247807639   0.059478392139713   0.056446322609377

  Columns 21 through 25

   0.053481047676680   0.050586118992641   0.047764498336559   0.045018448293553   0.042349402986237

  Columns 26 through 30

   0.039757928982243   0.037243744405979   0.034805729701538   0.032442087767753   0.030150468811788

  Columns 31 through 35

   0.027928254091492   0.025772854547932   0.023682152884994   0.021655091095922   0.019692456223773

  Columns 36 through 40

   0.017797874841910   0.015978961478685   0.014248169354525                   0                   0

  Columns 41 through 45

                   0                   0                   0                   0                   0

  Columns 46 through 50

                   0                   0                   0                   0                   0

  Columns 51 through 55

                   0                   0                   0                   0                   0

  Columns 56 through 60

                   0                   0                   0                   0                   0

  Column 61

                   0


outer_code_BER =

  Columns 1 through 5

   0.120918740878550   0.117333100156390   0.113754271868533   0.110184228504477   0.106625029022010

  Columns 6 through 10

   0.103078846910974   0.099548002978233   0.096034959550922   0.092542353197978   0.089073031956679

  Columns 11 through 15

   0.085630049437032   0.082216693243585   0.078836513027409   0.075493293060842   0.072191051870185

  Columns 16 through 20

   0.068934031073433   0.065726605684831   0.062573247808524   0.059478392142404   0.056446322617231

  Columns 21 through 25

   0.053481047698697   0.050586119051861   0.047764498489414   0.045018448672097   0.042349403885782

  Columns 26 through 30

   0.039757931033612   0.037243748895336   0.034805739127685   0.032442106740395   0.030150505347679

  Columns 31 through 35

   0.027928321133248   0.025772970807092   0.023682340155398   0.021655360302959   0.019692763129732

  Columns 36 through 40

   0.017798002407345   0.015978243102014   0.014244912445416                   0                   0

  Columns 41 through 45

                   0                   0                   0                   0                   0

  Columns 46 through 50

                   0                   0                   0                   0                   0

  Columns 51 through 55

                   0                   0                   0                   0                   0

  Columns 56 through 60

                   0                   0                   0                   0                   0

  Column 61

                   0


inner_code_BER =

  Columns 1 through 5

   0.120918740878549   0.117333100156390   0.113754271868533   0.110184228504477   0.106625029022009

  Columns 6 through 10

   0.103078846910973   0.099548002978232   0.096034959550923   0.092542353197978   0.089073031956679

  Columns 11 through 15

   0.085630049437032   0.082216693243584   0.078836513027406   0.075493293060834   0.072191051870160

  Columns 16 through 20

   0.068934031073347   0.065726605684552   0.062573247807639   0.059478392139713   0.056446322609377

  Columns 21 through 25

   0.053481047676680   0.050586118992641   0.047764498336559   0.045018448293553   0.042349402986237

  Columns 26 through 30

   0.039757928982243   0.037243744405979   0.034805729701538   0.032442087767753   0.030150468811788

  Columns 31 through 35

   0.027928254091492   0.025772854547932   0.023682152884994   0.021655091095922   0.019692456223773

  Columns 36 through 40

   0.017797874841910   0.015978961478685   0.014248169354525   0.012622710918307                   0

  Columns 41 through 45

                   0                   0                   0                   0                   0

  Columns 46 through 50

                   0                   0                   0                   0                   0

  Columns 51 through 55

                   0                   0                   0                   0                   0

  Columns 56 through 60

                   0                   0                   0                   0                   0

  Column 61

                   0


outer_code_BER =

  Columns 1 through 5

   0.120918740878550   0.117333100156390   0.113754271868533   0.110184228504477   0.106625029022010

  Columns 6 through 10

   0.103078846910974   0.099548002978233   0.096034959550922   0.092542353197978   0.089073031956679

  Columns 11 through 15

   0.085630049437032   0.082216693243585   0.078836513027409   0.075493293060842   0.072191051870185

  Columns 16 through 20

   0.068934031073433   0.065726605684831   0.062573247808524   0.059478392142404   0.056446322617231

  Columns 21 through 25

   0.053481047698697   0.050586119051861   0.047764498489414   0.045018448672097   0.042349403885782

  Columns 26 through 30

   0.039757931033612   0.037243748895336   0.034805739127685   0.032442106740395   0.030150505347679

  Columns 31 through 35

   0.027928321133248   0.025772970807092   0.023682340155398   0.021655360302959   0.019692763129732

  Columns 36 through 40

   0.017798002407345   0.015978243102014   0.014244912445416   0.012613164352109                   0

  Columns 41 through 45

                   0                   0                   0                   0                   0

  Columns 46 through 50

                   0                   0                   0                   0                   0

  Columns 51 through 55

                   0                   0                   0                   0                   0

  Columns 56 through 60

                   0                   0                   0                   0                   0

  Column 61

                   0


inner_code_BER =

  Columns 1 through 5

   0.120918740878549   0.117333100156390   0.113754271868533   0.110184228504477   0.106625029022009

  Columns 6 through 10

   0.103078846910973   0.099548002978232   0.096034959550923   0.092542353197978   0.089073031956679

  Columns 11 through 15

   0.085630049437032   0.082216693243584   0.078836513027406   0.075493293060834   0.072191051870160

  Columns 16 through 20

   0.068934031073347   0.065726605684552   0.062573247807639   0.059478392139713   0.056446322609377

  Columns 21 through 25

   0.053481047676680   0.050586118992641   0.047764498336559   0.045018448293553   0.042349402986237

  Columns 26 through 30

   0.039757928982243   0.037243744405979   0.034805729701538   0.032442087767753   0.030150468811788

  Columns 31 through 35

   0.027928254091492   0.025772854547932   0.023682152884994   0.021655091095922   0.019692456223773

  Columns 36 through 40

   0.017797874841910   0.015978961478685   0.014248169354525   0.012622710918307   0.011122473177208

  Columns 41 through 45

                   0                   0                   0                   0                   0

  Columns 46 through 50

                   0                   0                   0                   0                   0

  Columns 51 through 55

                   0                   0                   0                   0                   0

  Columns 56 through 60

                   0                   0                   0                   0                   0

  Column 61

                   0


outer_code_BER =

  Columns 1 through 5

   0.120918740878550   0.117333100156390   0.113754271868533   0.110184228504477   0.106625029022010

  Columns 6 through 10

   0.103078846910974   0.099548002978233   0.096034959550922   0.092542353197978   0.089073031956679

  Columns 11 through 15

   0.085630049437032   0.082216693243585   0.078836513027409   0.075493293060842   0.072191051870185

  Columns 16 through 20

   0.068934031073433   0.065726605684831   0.062573247808524   0.059478392142404   0.056446322617231

  Columns 21 through 25

   0.053481047698697   0.050586119051861   0.047764498489414   0.045018448672097   0.042349403885782

  Columns 26 through 30

   0.039757931033612   0.037243748895336   0.034805739127685   0.032442106740395   0.030150505347679

  Columns 31 through 35

   0.027928321133248   0.025772970807092   0.023682340155398   0.021655360302959   0.019692763129732

  Columns 36 through 40

   0.017798002407345   0.015978243102014   0.014244912445416   0.012613164352109   0.011099314151127

  Columns 41 through 45

                   0                   0                   0                   0                   0

  Columns 46 through 50

                   0                   0                   0                   0                   0

  Columns 51 through 55

                   0                   0                   0                   0                   0

  Columns 56 through 60

                   0                   0                   0                   0                   0

  Column 61

                   0


inner_code_BER =

  Columns 1 through 5

   0.120918740878549   0.117333100156390   0.113754271868533   0.110184228504477   0.106625029022009

  Columns 6 through 10

   0.103078846910973   0.099548002978232   0.096034959550923   0.092542353197978   0.089073031956679

  Columns 11 through 15

   0.085630049437032   0.082216693243584   0.078836513027406   0.075493293060834   0.072191051870160

  Columns 16 through 20

   0.068934031073347   0.065726605684552   0.062573247807639   0.059478392139713   0.056446322609377

  Columns 21 through 25

   0.053481047676680   0.050586118992641   0.047764498336559   0.045018448293553   0.042349402986237

  Columns 26 through 30

   0.039757928982243   0.037243744405979   0.034805729701538   0.032442087767753   0.030150468811788

  Columns 31 through 35

   0.027928254091492   0.025772854547932   0.023682152884994   0.021655091095922   0.019692456223773

  Columns 36 through 40

   0.017797874841910   0.015978961478685   0.014248169354525   0.012622710918307   0.011122473177208

  Columns 41 through 45

   0.009765631545802                   0                   0                   0                   0

  Columns 46 through 50

                   0                   0                   0                   0                   0

  Columns 51 through 55

                   0                   0                   0                   0                   0

  Columns 56 through 60

                   0                   0                   0                   0                   0

  Column 61

                   0


outer_code_BER =

  Columns 1 through 5

   0.120918740878550   0.117333100156390   0.113754271868533   0.110184228504477   0.106625029022010

  Columns 6 through 10

   0.103078846910974   0.099548002978233   0.096034959550922   0.092542353197978   0.089073031956679

  Columns 11 through 15

   0.085630049437032   0.082216693243585   0.078836513027409   0.075493293060842   0.072191051870185

  Columns 16 through 20

   0.068934031073433   0.065726605684831   0.062573247808524   0.059478392142404   0.056446322617231

  Columns 21 through 25

   0.053481047698697   0.050586119051861   0.047764498489414   0.045018448672097   0.042349403885782

  Columns 26 through 30

   0.039757931033612   0.037243748895336   0.034805739127685   0.032442106740395   0.030150505347679

  Columns 31 through 35

   0.027928321133248   0.025772970807092   0.023682340155398   0.021655360302959   0.019692763129732

  Columns 36 through 40

   0.017798002407345   0.015978243102014   0.014244912445416   0.012613164352109   0.011099314151127

  Columns 41 through 45

   0.009716278559484                   0                   0                   0                   0

  Columns 46 through 50

                   0                   0                   0                   0                   0

  Columns 51 through 55

                   0                   0                   0                   0                   0

  Columns 56 through 60

                   0                   0                   0                   0                   0

  Column 61

                   0


inner_code_BER =

  Columns 1 through 5

   0.120918740878549   0.117333100156390   0.113754271868533   0.110184228504477   0.106625029022009

  Columns 6 through 10

   0.103078846910973   0.099548002978232   0.096034959550923   0.092542353197978   0.089073031956679

  Columns 11 through 15

   0.085630049437032   0.082216693243584   0.078836513027406   0.075493293060834   0.072191051870160

  Columns 16 through 20

   0.068934031073347   0.065726605684552   0.062573247807639   0.059478392139713   0.056446322609377

  Columns 21 through 25

   0.053481047676680   0.050586118992641   0.047764498336559   0.045018448293553   0.042349402986237

  Columns 26 through 30

   0.039757928982243   0.037243744405979   0.034805729701538   0.032442087767753   0.030150468811788

  Columns 31 through 35

   0.027928254091492   0.025772854547932   0.023682152884994   0.021655091095922   0.019692456223773

  Columns 36 through 40

   0.017797874841910   0.015978961478685   0.014248169354525   0.012622710918307   0.011122473177208

  Columns 41 through 45

   0.009765631545802   0.008563322795820                   0                   0                   0

  Columns 46 through 50

                   0                   0                   0                   0                   0

  Columns 51 through 55

                   0                   0                   0                   0                   0

  Columns 56 through 60

                   0                   0                   0                   0                   0

  Column 61

                   0


outer_code_BER =

  Columns 1 through 5

   0.120918740878550   0.117333100156390   0.113754271868533   0.110184228504477   0.106625029022010

  Columns 6 through 10

   0.103078846910974   0.099548002978233   0.096034959550922   0.092542353197978   0.089073031956679

  Columns 11 through 15

   0.085630049437032   0.082216693243585   0.078836513027409   0.075493293060842   0.072191051870185

  Columns 16 through 20

   0.068934031073433   0.065726605684831   0.062573247808524   0.059478392142404   0.056446322617231

  Columns 21 through 25

   0.053481047698697   0.050586119051861   0.047764498489414   0.045018448672097   0.042349403885782

  Columns 26 through 30

   0.039757931033612   0.037243748895336   0.034805739127685   0.032442106740395   0.030150505347679

  Columns 31 through 35

   0.027928321133248   0.025772970807092   0.023682340155398   0.021655360302959   0.019692763129732

  Columns 36 through 40

   0.017798002407345   0.015978243102014   0.014244912445416   0.012613164352109   0.011099314151127

  Columns 41 through 45

   0.009716278559484   0.008468652088098                   0                   0                   0

  Columns 46 through 50

                   0                   0                   0                   0                   0

  Columns 51 through 55

                   0                   0                   0                   0                   0

  Columns 56 through 60

                   0                   0                   0                   0                   0

  Column 61

                   0


inner_code_BER =

  Columns 1 through 5

   0.120918740878549   0.117333100156390   0.113754271868533   0.110184228504477   0.106625029022009

  Columns 6 through 10

   0.103078846910973   0.099548002978232   0.096034959550923   0.092542353197978   0.089073031956679

  Columns 11 through 15

   0.085630049437032   0.082216693243584   0.078836513027406   0.075493293060834   0.072191051870160

  Columns 16 through 20

   0.068934031073347   0.065726605684552   0.062573247807639   0.059478392139713   0.056446322609377

  Columns 21 through 25

   0.053481047676680   0.050586118992641   0.047764498336559   0.045018448293553   0.042349402986237

  Columns 26 through 30

   0.039757928982243   0.037243744405979   0.034805729701538   0.032442087767753   0.030150468811788

  Columns 31 through 35

   0.027928254091492   0.025772854547932   0.023682152884994   0.021655091095922   0.019692456223773

  Columns 36 through 40

   0.017797874841910   0.015978961478685   0.014248169354525   0.012622710918307   0.011122473177208

  Columns 41 through 45

   0.009765631545802   0.008563322795820   0.007516416407668                   0                   0

  Columns 46 through 50

                   0                   0                   0                   0                   0

  Columns 51 through 55

                   0                   0                   0                   0                   0

  Columns 56 through 60

                   0                   0                   0                   0                   0

  Column 61

                   0


outer_code_BER =

  Columns 1 through 5

   0.120918740878550   0.117333100156390   0.113754271868533   0.110184228504477   0.106625029022010

  Columns 6 through 10

   0.103078846910974   0.099548002978233   0.096034959550922   0.092542353197978   0.089073031956679

  Columns 11 through 15

   0.085630049437032   0.082216693243585   0.078836513027409   0.075493293060842   0.072191051870185

  Columns 16 through 20

   0.068934031073433   0.065726605684831   0.062573247808524   0.059478392142404   0.056446322617231

  Columns 21 through 25

   0.053481047698697   0.050586119051861   0.047764498489414   0.045018448672097   0.042349403885782

  Columns 26 through 30

   0.039757931033612   0.037243748895336   0.034805739127685   0.032442106740395   0.030150505347679

  Columns 31 through 35

   0.027928321133248   0.025772970807092   0.023682340155398   0.021655360302959   0.019692763129732

  Columns 36 through 40

   0.017798002407345   0.015978243102014   0.014244912445416   0.012613164352109   0.011099314151127

  Columns 41 through 45

   0.009716278559484   0.008468652088098   0.007350190835552                   0                   0

  Columns 46 through 50

                   0                   0                   0                   0                   0

  Columns 51 through 55

                   0                   0                   0                   0                   0

  Columns 56 through 60

                   0                   0                   0                   0                   0

  Column 61

                   0


inner_code_BER =

  Columns 1 through 5

   0.120918740878549   0.117333100156390   0.113754271868533   0.110184228504477   0.106625029022009

  Columns 6 through 10

   0.103078846910973   0.099548002978232   0.096034959550923   0.092542353197978   0.089073031956679

  Columns 11 through 15

   0.085630049437032   0.082216693243584   0.078836513027406   0.075493293060834   0.072191051870160

  Columns 16 through 20

   0.068934031073347   0.065726605684552   0.062573247807639   0.059478392139713   0.056446322609377

  Columns 21 through 25

   0.053481047676680   0.050586118992641   0.047764498336559   0.045018448293553   0.042349402986237

  Columns 26 through 30

   0.039757928982243   0.037243744405979   0.034805729701538   0.032442087767753   0.030150468811788

  Columns 31 through 35

   0.027928254091492   0.025772854547932   0.023682152884994   0.021655091095922   0.019692456223773

  Columns 36 through 40

   0.017797874841910   0.015978961478685   0.014248169354525   0.012622710918307   0.011122473177208

  Columns 41 through 45

   0.009765631545802   0.008563322795820   0.007516416407668   0.006615911018420                   0

  Columns 46 through 50

                   0                   0                   0                   0                   0

  Columns 51 through 55

                   0                   0                   0                   0                   0

  Columns 56 through 60

                   0                   0                   0                   0                   0

  Column 61

                   0


outer_code_BER =

  Columns 1 through 5

   0.120918740878550   0.117333100156390   0.113754271868533   0.110184228504477   0.106625029022010

  Columns 6 through 10

   0.103078846910974   0.099548002978233   0.096034959550922   0.092542353197978   0.089073031956679

  Columns 11 through 15

   0.085630049437032   0.082216693243585   0.078836513027409   0.075493293060842   0.072191051870185

  Columns 16 through 20

   0.068934031073433   0.065726605684831   0.062573247808524   0.059478392142404   0.056446322617231

  Columns 21 through 25

   0.053481047698697   0.050586119051861   0.047764498489414   0.045018448672097   0.042349403885782

  Columns 26 through 30

   0.039757931033612   0.037243748895336   0.034805739127685   0.032442106740395   0.030150505347679

  Columns 31 through 35

   0.027928321133248   0.025772970807092   0.023682340155398   0.021655360302959   0.019692763129732

  Columns 36 through 40

   0.017798002407345   0.015978243102014   0.014244912445416   0.012613164352109   0.011099314151127

  Columns 41 through 45

   0.009716278559484   0.008468652088098   0.007350190835552   0.006344338113564                   0

  Columns 46 through 50

                   0                   0                   0                   0                   0

  Columns 51 through 55

                   0                   0                   0                   0                   0

  Columns 56 through 60

                   0                   0                   0                   0                   0

  Column 61

                   0


inner_code_BER =

  Columns 1 through 5

   0.120918740878549   0.117333100156390   0.113754271868533   0.110184228504477   0.106625029022009

  Columns 6 through 10

   0.103078846910973   0.099548002978232   0.096034959550923   0.092542353197978   0.089073031956679

  Columns 11 through 15

   0.085630049437032   0.082216693243584   0.078836513027406   0.075493293060834   0.072191051870160

  Columns 16 through 20

   0.068934031073347   0.065726605684552   0.062573247807639   0.059478392139713   0.056446322609377

  Columns 21 through 25

   0.053481047676680   0.050586118992641   0.047764498336559   0.045018448293553   0.042349402986237

  Columns 26 through 30

   0.039757928982243   0.037243744405979   0.034805729701538   0.032442087767753   0.030150468811788

  Columns 31 through 35

   0.027928254091492   0.025772854547932   0.023682152884994   0.021655091095922   0.019692456223773

  Columns 36 through 40

   0.017797874841910   0.015978961478685   0.014248169354525   0.012622710918307   0.011122473177208

  Columns 41 through 45

   0.009765631545802   0.008563322795820   0.007516416407668   0.006615911018420   0.005846326309033

  Columns 46 through 50

                   0                   0                   0                   0                   0

  Columns 51 through 55

                   0                   0                   0                   0                   0

  Columns 56 through 60

                   0                   0                   0                   0                   0

  Column 61

                   0


outer_code_BER =

  Columns 1 through 5

   0.120918740878550   0.117333100156390   0.113754271868533   0.110184228504477   0.106625029022010

  Columns 6 through 10

   0.103078846910974   0.099548002978233   0.096034959550922   0.092542353197978   0.089073031956679

  Columns 11 through 15

   0.085630049437032   0.082216693243585   0.078836513027409   0.075493293060842   0.072191051870185

  Columns 16 through 20

   0.068934031073433   0.065726605684831   0.062573247808524   0.059478392142404   0.056446322617231

  Columns 21 through 25

   0.053481047698697   0.050586119051861   0.047764498489414   0.045018448672097   0.042349403885782

  Columns 26 through 30

   0.039757931033612   0.037243748895336   0.034805739127685   0.032442106740395   0.030150505347679

  Columns 31 through 35

   0.027928321133248   0.025772970807092   0.023682340155398   0.021655360302959   0.019692763129732

  Columns 36 through 40

   0.017798002407345   0.015978243102014   0.014244912445416   0.012613164352109   0.011099314151127

  Columns 41 through 45

   0.009716278559484   0.008468652088098   0.007350190835552   0.006344338113564   0.005426049386072

  Columns 46 through 50

                   0                   0                   0                   0                   0

  Columns 51 through 55

                   0                   0                   0                   0                   0

  Columns 56 through 60

                   0                   0                   0                   0                   0

  Column 61

                   0


inner_code_BER =

  Columns 1 through 5

   0.120918740878549   0.117333100156390   0.113754271868533   0.110184228504477   0.106625029022009

  Columns 6 through 10

   0.103078846910973   0.099548002978232   0.096034959550923   0.092542353197978   0.089073031956679

  Columns 11 through 15

   0.085630049437032   0.082216693243584   0.078836513027406   0.075493293060834   0.072191051870160

  Columns 16 through 20

   0.068934031073347   0.065726605684552   0.062573247807639   0.059478392139713   0.056446322609377

  Columns 21 through 25

   0.053481047676680   0.050586118992641   0.047764498336559   0.045018448293553   0.042349402986237

  Columns 26 through 30

   0.039757928982243   0.037243744405979   0.034805729701538   0.032442087767753   0.030150468811788

  Columns 31 through 35

   0.027928254091492   0.025772854547932   0.023682152884994   0.021655091095922   0.019692456223773

  Columns 36 through 40

   0.017797874841910   0.015978961478685   0.014248169354525   0.012622710918307   0.011122473177208

  Columns 41 through 45

   0.009765631545802   0.008563322795820   0.007516416407668   0.006615911018420   0.005846326309033

  Columns 46 through 50

   0.005189642431521                   0                   0                   0                   0

  Columns 51 through 55

                   0                   0                   0                   0                   0

  Columns 56 through 60

                   0                   0                   0                   0                   0

  Column 61

                   0


outer_code_BER =

  Columns 1 through 5

   0.120918740878550   0.117333100156390   0.113754271868533   0.110184228504477   0.106625029022010

  Columns 6 through 10

   0.103078846910974   0.099548002978233   0.096034959550922   0.092542353197978   0.089073031956679

  Columns 11 through 15

   0.085630049437032   0.082216693243585   0.078836513027409   0.075493293060842   0.072191051870185

  Columns 16 through 20

   0.068934031073433   0.065726605684831   0.062573247808524   0.059478392142404   0.056446322617231

  Columns 21 through 25

   0.053481047698697   0.050586119051861   0.047764498489414   0.045018448672097   0.042349403885782

  Columns 26 through 30

   0.039757931033612   0.037243748895336   0.034805739127685   0.032442106740395   0.030150505347679

  Columns 31 through 35

   0.027928321133248   0.025772970807092   0.023682340155398   0.021655360302959   0.019692763129732

  Columns 36 through 40

   0.017798002407345   0.015978243102014   0.014244912445416   0.012613164352109   0.011099314151127

  Columns 41 through 45

   0.009716278559484   0.008468652088098   0.007350190835552   0.006344338113564   0.005426049386072

  Columns 46 through 50

   0.004560318007727                   0                   0                   0                   0

  Columns 51 through 55

                   0                   0                   0                   0                   0

  Columns 56 through 60

                   0                   0                   0                   0                   0

  Column 61

                   0


inner_code_BER =

  Columns 1 through 5

   0.120918740878549   0.117333100156390   0.113754271868533   0.110184228504477   0.106625029022009

  Columns 6 through 10

   0.103078846910973   0.099548002978232   0.096034959550923   0.092542353197978   0.089073031956679

  Columns 11 through 15

   0.085630049437032   0.082216693243584   0.078836513027406   0.075493293060834   0.072191051870160

  Columns 16 through 20

   0.068934031073347   0.065726605684552   0.062573247807639   0.059478392139713   0.056446322609377

  Columns 21 through 25

   0.053481047676680   0.050586118992641   0.047764498336559   0.045018448293553   0.042349402986237

  Columns 26 through 30

   0.039757928982243   0.037243744405979   0.034805729701538   0.032442087767753   0.030150468811788

  Columns 31 through 35

   0.027928254091492   0.025772854547932   0.023682152884994   0.021655091095922   0.019692456223773

  Columns 36 through 40

   0.017797874841910   0.015978961478685   0.014248169354525   0.012622710918307   0.011122473177208

  Columns 41 through 45

   0.009765631545802   0.008563322795820   0.007516416407668   0.006615911018420   0.005846326309033

  Columns 46 through 50

   0.005189642431521   0.004628155822478                   0                   0                   0

  Columns 51 through 55

                   0                   0                   0                   0                   0

  Columns 56 through 60

                   0                   0                   0                   0                   0

  Column 61

                   0


outer_code_BER =

  Columns 1 through 5

   0.120918740878550   0.117333100156390   0.113754271868533   0.110184228504477   0.106625029022010

  Columns 6 through 10

   0.103078846910974   0.099548002978233   0.096034959550922   0.092542353197978   0.089073031956679

  Columns 11 through 15

   0.085630049437032   0.082216693243585   0.078836513027409   0.075493293060842   0.072191051870185

  Columns 16 through 20

   0.068934031073433   0.065726605684831   0.062573247808524   0.059478392142404   0.056446322617231

  Columns 21 through 25

   0.053481047698697   0.050586119051861   0.047764498489414   0.045018448672097   0.042349403885782

  Columns 26 through 30

   0.039757931033612   0.037243748895336   0.034805739127685   0.032442106740395   0.030150505347679

  Columns 31 through 35

   0.027928321133248   0.025772970807092   0.023682340155398   0.021655360302959   0.019692763129732

  Columns 36 through 40

   0.017798002407345   0.015978243102014   0.014244912445416   0.012613164352109   0.011099314151127

  Columns 41 through 45

   0.009716278559484   0.008468652088098   0.007350190835552   0.006344338113564   0.005426049386072

  Columns 46 through 50

   0.004560318007727   0.003684816005292                   0                   0                   0

  Columns 51 through 55

                   0                   0                   0                   0                   0

  Columns 56 through 60

                   0                   0                   0                   0                   0

  Column 61

                   0


inner_code_BER =

  Columns 1 through 5

   0.120918740878549   0.117333100156390   0.113754271868533   0.110184228504477   0.106625029022009

  Columns 6 through 10

   0.103078846910973   0.099548002978232   0.096034959550923   0.092542353197978   0.089073031956679

  Columns 11 through 15

   0.085630049437032   0.082216693243584   0.078836513027406   0.075493293060834   0.072191051870160

  Columns 16 through 20

   0.068934031073347   0.065726605684552   0.062573247807639   0.059478392139713   0.056446322609377

  Columns 21 through 25

   0.053481047676680   0.050586118992641   0.047764498336559   0.045018448293553   0.042349402986237

  Columns 26 through 30

   0.039757928982243   0.037243744405979   0.034805729701538   0.032442087767753   0.030150468811788

  Columns 31 through 35

   0.027928254091492   0.025772854547932   0.023682152884994   0.021655091095922   0.019692456223773

  Columns 36 through 40

   0.017797874841910   0.015978961478685   0.014248169354525   0.012622710918307   0.011122473177208

  Columns 41 through 45

   0.009765631545802   0.008563322795820   0.007516416407668   0.006615911018420   0.005846326309033

  Columns 46 through 50

   0.005189642431521   0.004628155822478   0.004146034826945                   0                   0

  Columns 51 through 55

                   0                   0                   0                   0                   0

  Columns 56 through 60

                   0                   0                   0                   0                   0

  Column 61

                   0


outer_code_BER =

  Columns 1 through 5

   0.120918740878550   0.117333100156390   0.113754271868533   0.110184228504477   0.106625029022010

  Columns 6 through 10

   0.103078846910974   0.099548002978233   0.096034959550922   0.092542353197978   0.089073031956679

  Columns 11 through 15

   0.085630049437032   0.082216693243585   0.078836513027409   0.075493293060842   0.072191051870185

  Columns 16 through 20

   0.068934031073433   0.065726605684831   0.062573247808524   0.059478392142404   0.056446322617231

  Columns 21 through 25

   0.053481047698697   0.050586119051861   0.047764498489414   0.045018448672097   0.042349403885782

  Columns 26 through 30

   0.039757931033612   0.037243748895336   0.034805739127685   0.032442106740395   0.030150505347679

  Columns 31 through 35

   0.027928321133248   0.025772970807092   0.023682340155398   0.021655360302959   0.019692763129732

  Columns 36 through 40

   0.017798002407345   0.015978243102014   0.014244912445416   0.012613164352109   0.011099314151127

  Columns 41 through 45

   0.009716278559484   0.008468652088098   0.007350190835552   0.006344338113564   0.005426049386072

  Columns 46 through 50

   0.004560318007727   0.003684816005292   0.002580911864822                   0                   0

  Columns 51 through 55

                   0                   0                   0                   0                   0

  Columns 56 through 60

                   0                   0                   0                   0                   0

  Column 61

                   0


inner_code_BER =

  Columns 1 through 5

   0.120918740878549   0.117333100156390   0.113754271868533   0.110184228504477   0.106625029022009

  Columns 6 through 10

   0.103078846910973   0.099548002978232   0.096034959550923   0.092542353197978   0.089073031956679

  Columns 11 through 15

   0.085630049437032   0.082216693243584   0.078836513027406   0.075493293060834   0.072191051870160

  Columns 16 through 20

   0.068934031073347   0.065726605684552   0.062573247807639   0.059478392139713   0.056446322609377

  Columns 21 through 25

   0.053481047676680   0.050586118992641   0.047764498336559   0.045018448293553   0.042349402986237

  Columns 26 through 30

   0.039757928982243   0.037243744405979   0.034805729701538   0.032442087767753   0.030150468811788

  Columns 31 through 35

   0.027928254091492   0.025772854547932   0.023682152884994   0.021655091095922   0.019692456223773

  Columns 36 through 40

   0.017797874841910   0.015978961478685   0.014248169354525   0.012622710918307   0.011122473177208

  Columns 41 through 45

   0.009765631545802   0.008563322795820   0.007516416407668   0.006615911018420   0.005846326309033

  Columns 46 through 50

   0.005189642431521   0.004628155822478   0.004146034826945   0.003729828912863                   0

  Columns 51 through 55

                   0                   0                   0                   0                   0

  Columns 56 through 60

                   0                   0                   0                   0                   0

  Column 61

                   0


outer_code_BER =

  Columns 1 through 5

   0.120918740878550   0.117333100156390   0.113754271868533   0.110184228504477   0.106625029022010

  Columns 6 through 10

   0.103078846910974   0.099548002978233   0.096034959550922   0.092542353197978   0.089073031956679

  Columns 11 through 15

   0.085630049437032   0.082216693243585   0.078836513027409   0.075493293060842   0.072191051870185

  Columns 16 through 20

   0.068934031073433   0.065726605684831   0.062573247808524   0.059478392142404   0.056446322617231

  Columns 21 through 25

   0.053481047698697   0.050586119051861   0.047764498489414   0.045018448672097   0.042349403885782

  Columns 26 through 30

   0.039757931033612   0.037243748895336   0.034805739127685   0.032442106740395   0.030150505347679

  Columns 31 through 35

   0.027928321133248   0.025772970807092   0.023682340155398   0.021655360302959   0.019692763129732

  Columns 36 through 40

   0.017798002407345   0.015978243102014   0.014244912445416   0.012613164352109   0.011099314151127

  Columns 41 through 45

   0.009716278559484   0.008468652088098   0.007350190835552   0.006344338113564   0.005426049386072

  Columns 46 through 50

   0.004560318007727   0.003684816005292   0.002580911864822   0.000188996633563                   0

  Columns 51 through 55

                   0                   0                   0                   0                   0

  Columns 56 through 60

                   0                   0                   0                   0                   0

  Column 61

                   0


inner_code_BER =

  Columns 1 through 5

   0.120918740878549   0.117333100156390   0.113754271868533   0.110184228504477   0.106625029022009

  Columns 6 through 10

   0.103078846910973   0.099548002978232   0.096034959550923   0.092542353197978   0.089073031956679

  Columns 11 through 15

   0.085630049437032   0.082216693243584   0.078836513027406   0.075493293060834   0.072191051870160

  Columns 16 through 20

   0.068934031073347   0.065726605684552   0.062573247807639   0.059478392139713   0.056446322609377

  Columns 21 through 25

   0.053481047676680   0.050586118992641   0.047764498336559   0.045018448293553   0.042349402986237

  Columns 26 through 30

   0.039757928982243   0.037243744405979   0.034805729701538   0.032442087767753   0.030150468811788

  Columns 31 through 35

   0.027928254091492   0.025772854547932   0.023682152884994   0.021655091095922   0.019692456223773

  Columns 36 through 40

   0.017797874841910   0.015978961478685   0.014248169354525   0.012622710918307   0.011122473177208

  Columns 41 through 45

   0.009765631545802   0.008563322795820   0.007516416407668   0.006615911018420   0.005846326309033

  Columns 46 through 50

   0.005189642431521   0.004628155822478   0.004146034826945   0.003729828912863   0.003368417303501

  Columns 51 through 55

                   0                   0                   0                   0                   0

  Columns 56 through 60

                   0                   0                   0                   0                   0

  Column 61

                   0


outer_code_BER =

  Columns 1 through 5

   0.120918740878550   0.117333100156390   0.113754271868533   0.110184228504477   0.106625029022010

  Columns 6 through 10

   0.103078846910974   0.099548002978233   0.096034959550922   0.092542353197978   0.089073031956679

  Columns 11 through 15

   0.085630049437032   0.082216693243585   0.078836513027409   0.075493293060842   0.072191051870185

  Columns 16 through 20

   0.068934031073433   0.065726605684831   0.062573247808524   0.059478392142404   0.056446322617231

  Columns 21 through 25

   0.053481047698697   0.050586119051861   0.047764498489414   0.045018448672097   0.042349403885782

  Columns 26 through 30

   0.039757931033612   0.037243748895336   0.034805739127685   0.032442106740395   0.030150505347679

  Columns 31 through 35

   0.027928321133248   0.025772970807092   0.023682340155398   0.021655360302959   0.019692763129732

  Columns 36 through 40

   0.017798002407345   0.015978243102014   0.014244912445416   0.012613164352109   0.011099314151127

  Columns 41 through 45

   0.009716278559484   0.008468652088098   0.007350190835552   0.006344338113564   0.005426049386072

  Columns 46 through 50

   0.004560318007727   0.003684816005292   0.002580911864822   0.000188996633563   0.000000030188179

  Columns 51 through 55

                   0                   0                   0                   0                   0

  Columns 56 through 60

                   0                   0                   0                   0                   0

  Column 61

                   0

��ǰ�����������ѵ���Ŀ�������ʣ������Ϊ4.90 dB

inner_code_BER =

  Columns 1 through 5

   0.120918740878549   0.117333100156390   0.113754271868533   0.110184228504477   0.106625029022009

  Columns 6 through 10

   0.103078846910973   0.099548002978232   0.096034959550923   0.092542353197978   0.089073031956679

  Columns 11 through 15

   0.085630049437032   0.082216693243584   0.078836513027406   0.075493293060834   0.072191051870160

  Columns 16 through 20

   0.068934031073347   0.065726605684552   0.062573247807639   0.059478392139713   0.056446322609377

  Columns 21 through 25

   0.053481047676680   0.050586118992641   0.047764498336559   0.045018448293553   0.042349402986237

  Columns 26 through 30

   0.039757928982243   0.037243744405979   0.034805729701538   0.032442087767753   0.030150468811788

  Columns 31 through 35

   0.027928254091492   0.025772854547932   0.023682152884994   0.021655091095922   0.019692456223773

  Columns 36 through 40

   0.017797874841910   0.015978961478685   0.014248169354525   0.012622710918307   0.011122473177208

  Columns 41 through 45

   0.009765631545802   0.008563322795820   0.007516416407668   0.006615911018420   0.005846326309033

  Columns 46 through 50

   0.005189642431521   0.004628155822478   0.004146034826945   0.003729828912863   0.003368417303501

  Columns 51 through 55

   0.003052746113986                   0                   0                   0                   0

  Columns 56 through 60

                   0                   0                   0                   0                   0

  Column 61

                   0


inner_code_BER =

  Columns 1 through 5

   0.120918740878549   0.117333100156390   0.113754271868533   0.110184228504477   0.106625029022009

  Columns 6 through 10

   0.103078846910973   0.099548002978232   0.096034959550923   0.092542353197978   0.089073031956679

  Columns 11 through 15

   0.085630049437032   0.082216693243584   0.078836513027406   0.075493293060834   0.072191051870160

  Columns 16 through 20

   0.068934031073347   0.065726605684552   0.062573247807639   0.059478392139713   0.056446322609377

  Columns 21 through 25

   0.053481047676680   0.050586118992641   0.047764498336559   0.045018448293553   0.042349402986237

  Columns 26 through 30

   0.039757928982243   0.037243744405979   0.034805729701538   0.032442087767753   0.030150468811788

  Columns 31 through 35

   0.027928254091492   0.025772854547932   0.023682152884994   0.021655091095922   0.019692456223773

  Columns 36 through 40

   0.017797874841910   0.015978961478685   0.014248169354525   0.012622710918307   0.011122473177208

  Columns 41 through 45

   0.009765631545802   0.008563322795820   0.007516416407668   0.006615911018420   0.005846326309033

  Columns 46 through 50

   0.005189642431521   0.004628155822478   0.004146034826945   0.003729828912863   0.003368417303501

  Columns 51 through 55

   0.003052746113986   0.002775469000010                   0                   0                   0

  Columns 56 through 60

                   0                   0                   0                   0                   0

  Column 61

                   0


inner_code_BER =

  Columns 1 through 5

   0.120918740878549   0.117333100156390   0.113754271868533   0.110184228504477   0.106625029022009

  Columns 6 through 10

   0.103078846910973   0.099548002978232   0.096034959550923   0.092542353197978   0.089073031956679

  Columns 11 through 15

   0.085630049437032   0.082216693243584   0.078836513027406   0.075493293060834   0.072191051870160

  Columns 16 through 20

   0.068934031073347   0.065726605684552   0.062573247807639   0.059478392139713   0.056446322609377

  Columns 21 through 25

   0.053481047676680   0.050586118992641   0.047764498336559   0.045018448293553   0.042349402986237

  Columns 26 through 30

   0.039757928982243   0.037243744405979   0.034805729701538   0.032442087767753   0.030150468811788

  Columns 31 through 35

   0.027928254091492   0.025772854547932   0.023682152884994   0.021655091095922   0.019692456223773

  Columns 36 through 40

   0.017797874841910   0.015978961478685   0.014248169354525   0.012622710918307   0.011122473177208

  Columns 41 through 45

   0.009765631545802   0.008563322795820   0.007516416407668   0.006615911018420   0.005846326309033

  Columns 46 through 50

   0.005189642431521   0.004628155822478   0.004146034826945   0.003729828912863   0.003368417303501

  Columns 51 through 55

   0.003052746113986   0.002775469000010   0.002530610107400                   0                   0

  Columns 56 through 60

                   0                   0                   0                   0                   0

  Column 61

                   0


inner_code_BER =

  Columns 1 through 5

   0.120918740878549   0.117333100156390   0.113754271868533   0.110184228504477   0.106625029022009

  Columns 6 through 10

   0.103078846910973   0.099548002978232   0.096034959550923   0.092542353197978   0.089073031956679

  Columns 11 through 15

   0.085630049437032   0.082216693243584   0.078836513027406   0.075493293060834   0.072191051870160

  Columns 16 through 20

   0.068934031073347   0.065726605684552   0.062573247807639   0.059478392139713   0.056446322609377

  Columns 21 through 25

   0.053481047676680   0.050586118992641   0.047764498336559   0.045018448293553   0.042349402986237

  Columns 26 through 30

   0.039757928982243   0.037243744405979   0.034805729701538   0.032442087767753   0.030150468811788

  Columns 31 through 35

   0.027928254091492   0.025772854547932   0.023682152884994   0.021655091095922   0.019692456223773

  Columns 36 through 40

   0.017797874841910   0.015978961478685   0.014248169354525   0.012622710918307   0.011122473177208

  Columns 41 through 45

   0.009765631545802   0.008563322795820   0.007516416407668   0.006615911018420   0.005846326309033

  Columns 46 through 50

   0.005189642431521   0.004628155822478   0.004146034826945   0.003729828912863   0.003368417303501

  Columns 51 through 55

   0.003052746113986   0.002775469000010   0.002530610107400   0.002313316424473                   0

  Columns 56 through 60

                   0                   0                   0                   0                   0

  Column 61

                   0


inner_code_BER =

  Columns 1 through 5

   0.120918740878549   0.117333100156390   0.113754271868533   0.110184228504477   0.106625029022009

  Columns 6 through 10

   0.103078846910973   0.099548002978232   0.096034959550923   0.092542353197978   0.089073031956679

  Columns 11 through 15

   0.085630049437032   0.082216693243584   0.078836513027406   0.075493293060834   0.072191051870160

  Columns 16 through 20

   0.068934031073347   0.065726605684552   0.062573247807639   0.059478392139713   0.056446322609377

  Columns 21 through 25

   0.053481047676680   0.050586118992641   0.047764498336559   0.045018448293553   0.042349402986237

  Columns 26 through 30

   0.039757928982243   0.037243744405979   0.034805729701538   0.032442087767753   0.030150468811788

  Columns 31 through 35

   0.027928254091492   0.025772854547932   0.023682152884994   0.021655091095922   0.019692456223773

  Columns 36 through 40

   0.017797874841910   0.015978961478685   0.014248169354525   0.012622710918307   0.011122473177208

  Columns 41 through 45

   0.009765631545802   0.008563322795820   0.007516416407668   0.006615911018420   0.005846326309033

  Columns 46 through 50

   0.005189642431521   0.004628155822478   0.004146034826945   0.003729828912863   0.003368417303501

  Columns 51 through 55

   0.003052746113986   0.002775469000010   0.002530610107400   0.002313316424473   0.002119610315285

  Columns 56 through 60

                   0                   0                   0                   0                   0

  Column 61

                   0


inner_code_BER =

  Columns 1 through 5

   0.120918740878549   0.117333100156390   0.113754271868533   0.110184228504477   0.106625029022009

  Columns 6 through 10

   0.103078846910973   0.099548002978232   0.096034959550923   0.092542353197978   0.089073031956679

  Columns 11 through 15

   0.085630049437032   0.082216693243584   0.078836513027406   0.075493293060834   0.072191051870160

  Columns 16 through 20

   0.068934031073347   0.065726605684552   0.062573247807639   0.059478392139713   0.056446322609377

  Columns 21 through 25

   0.053481047676680   0.050586118992641   0.047764498336559   0.045018448293553   0.042349402986237

  Columns 26 through 30

   0.039757928982243   0.037243744405979   0.034805729701538   0.032442087767753   0.030150468811788

  Columns 31 through 35

   0.027928254091492   0.025772854547932   0.023682152884994   0.021655091095922   0.019692456223773

  Columns 36 through 40

   0.017797874841910   0.015978961478685   0.014248169354525   0.012622710918307   0.011122473177208

  Columns 41 through 45

   0.009765631545802   0.008563322795820   0.007516416407668   0.006615911018420   0.005846326309033

  Columns 46 through 50

   0.005189642431521   0.004628155822478   0.004146034826945   0.003729828912863   0.003368417303501

  Columns 51 through 55

   0.003052746113986   0.002775469000010   0.002530610107400   0.002313316424473   0.002119610315285

  Columns 56 through 60

   0.001946210402717                   0                   0                   0                   0

  Column 61

                   0


inner_code_BER =

  Columns 1 through 5

   0.120918740878549   0.117333100156390   0.113754271868533   0.110184228504477   0.106625029022009

  Columns 6 through 10

   0.103078846910973   0.099548002978232   0.096034959550923   0.092542353197978   0.089073031956679

  Columns 11 through 15

   0.085630049437032   0.082216693243584   0.078836513027406   0.075493293060834   0.072191051870160

  Columns 16 through 20

   0.068934031073347   0.065726605684552   0.062573247807639   0.059478392139713   0.056446322609377

  Columns 21 through 25

   0.053481047676680   0.050586118992641   0.047764498336559   0.045018448293553   0.042349402986237

  Columns 26 through 30

   0.039757928982243   0.037243744405979   0.034805729701538   0.032442087767753   0.030150468811788

  Columns 31 through 35

   0.027928254091492   0.025772854547932   0.023682152884994   0.021655091095922   0.019692456223773

  Columns 36 through 40

   0.017797874841910   0.015978961478685   0.014248169354525   0.012622710918307   0.011122473177208

  Columns 41 through 45

   0.009765631545802   0.008563322795820   0.007516416407668   0.006615911018420   0.005846326309033

  Columns 46 through 50

   0.005189642431521   0.004628155822478   0.004146034826945   0.003729828912863   0.003368417303501

  Columns 51 through 55

   0.003052746113986   0.002775469000010   0.002530610107400   0.002313316424473   0.002119610315285

  Columns 56 through 60

   0.001946210402717   0.001790408524324                   0                   0                   0

  Column 61

                   0


inner_code_BER =

  Columns 1 through 5

   0.120918740878549   0.117333100156390   0.113754271868533   0.110184228504477   0.106625029022009

  Columns 6 through 10

   0.103078846910973   0.099548002978232   0.096034959550923   0.092542353197978   0.089073031956679

  Columns 11 through 15

   0.085630049437032   0.082216693243584   0.078836513027406   0.075493293060834   0.072191051870160

  Columns 16 through 20

   0.068934031073347   0.065726605684552   0.062573247807639   0.059478392139713   0.056446322609377

  Columns 21 through 25

   0.053481047676680   0.050586118992641   0.047764498336559   0.045018448293553   0.042349402986237

  Columns 26 through 30

   0.039757928982243   0.037243744405979   0.034805729701538   0.032442087767753   0.030150468811788

  Columns 31 through 35

   0.027928254091492   0.025772854547932   0.023682152884994   0.021655091095922   0.019692456223773

  Columns 36 through 40

   0.017797874841910   0.015978961478685   0.014248169354525   0.012622710918307   0.011122473177208

  Columns 41 through 45

   0.009765631545802   0.008563322795820   0.007516416407668   0.006615911018420   0.005846326309033

  Columns 46 through 50

   0.005189642431521   0.004628155822478   0.004146034826945   0.003729828912863   0.003368417303501

  Columns 51 through 55

   0.003052746113986   0.002775469000010   0.002530610107400   0.002313316424473   0.002119610315285

  Columns 56 through 60

   0.001946210402717   0.001790408524324   0.001649932382104                   0                   0

  Column 61

                   0


inner_code_BER =

  Columns 1 through 5

   0.120918740878549   0.117333100156390   0.113754271868533   0.110184228504477   0.106625029022009

  Columns 6 through 10

   0.103078846910973   0.099548002978232   0.096034959550923   0.092542353197978   0.089073031956679

  Columns 11 through 15

   0.085630049437032   0.082216693243584   0.078836513027406   0.075493293060834   0.072191051870160

  Columns 16 through 20

   0.068934031073347   0.065726605684552   0.062573247807639   0.059478392139713   0.056446322609377

  Columns 21 through 25

   0.053481047676680   0.050586118992641   0.047764498336559   0.045018448293553   0.042349402986237

  Columns 26 through 30

   0.039757928982243   0.037243744405979   0.034805729701538   0.032442087767753   0.030150468811788

  Columns 31 through 35

   0.027928254091492   0.025772854547932   0.023682152884994   0.021655091095922   0.019692456223773

  Columns 36 through 40

   0.017797874841910   0.015978961478685   0.014248169354525   0.012622710918307   0.011122473177208

  Columns 41 through 45

   0.009765631545802   0.008563322795820   0.007516416407668   0.006615911018420   0.005846326309033

  Columns 46 through 50

   0.005189642431521   0.004628155822478   0.004146034826945   0.003729828912863   0.003368417303501

  Columns 51 through 55

   0.003052746113986   0.002775469000010   0.002530610107400   0.002313316424473   0.002119610315285

  Columns 56 through 60

   0.001946210402717   0.001790408524324   0.001649932382104   0.001522872227686                   0

  Column 61

                   0


inner_code_BER =

  Columns 1 through 5

   0.120918740878549   0.117333100156390   0.113754271868533   0.110184228504477   0.106625029022009

  Columns 6 through 10

   0.103078846910973   0.099548002978232   0.096034959550923   0.092542353197978   0.089073031956679

  Columns 11 through 15

   0.085630049437032   0.082216693243584   0.078836513027406   0.075493293060834   0.072191051870160

  Columns 16 through 20

   0.068934031073347   0.065726605684552   0.062573247807639   0.059478392139713   0.056446322609377

  Columns 21 through 25

   0.053481047676680   0.050586118992641   0.047764498336559   0.045018448293553   0.042349402986237

  Columns 26 through 30

   0.039757928982243   0.037243744405979   0.034805729701538   0.032442087767753   0.030150468811788

  Columns 31 through 35

   0.027928254091492   0.025772854547932   0.023682152884994   0.021655091095922   0.019692456223773

  Columns 36 through 40

   0.017797874841910   0.015978961478685   0.014248169354525   0.012622710918307   0.011122473177208

  Columns 41 through 45

   0.009765631545802   0.008563322795820   0.007516416407668   0.006615911018420   0.005846326309033

  Columns 46 through 50

   0.005189642431521   0.004628155822478   0.004146034826945   0.003729828912863   0.003368417303501

  Columns 51 through 55

   0.003052746113986   0.002775469000010   0.002530610107400   0.002313316424473   0.002119610315285

  Columns 56 through 60

   0.001946210402717   0.001790408524324   0.001649932382104   0.001522872227686   0.001407622904963

  Column 61

                   0


inner_code_BER =

  Columns 1 through 5

   0.120918740878549   0.117333100156390   0.113754271868533   0.110184228504477   0.106625029022009

  Columns 6 through 10

   0.103078846910973   0.099548002978232   0.096034959550923   0.092542353197978   0.089073031956679

  Columns 11 through 15

   0.085630049437032   0.082216693243584   0.078836513027406   0.075493293060834   0.072191051870160

  Columns 16 through 20

   0.068934031073347   0.065726605684552   0.062573247807639   0.059478392139713   0.056446322609377

  Columns 21 through 25

   0.053481047676680   0.050586118992641   0.047764498336559   0.045018448293553   0.042349402986237

  Columns 26 through 30

   0.039757928982243   0.037243744405979   0.034805729701538   0.032442087767753   0.030150468811788

  Columns 31 through 35

   0.027928254091492   0.025772854547932   0.023682152884994   0.021655091095922   0.019692456223773

  Columns 36 through 40

   0.017797874841910   0.015978961478685   0.014248169354525   0.012622710918307   0.011122473177208

  Columns 41 through 45

   0.009765631545802   0.008563322795820   0.007516416407668   0.006615911018420   0.005846326309033

  Columns 46 through 50

   0.005189642431521   0.004628155822478   0.004146034826945   0.003729828912863   0.003368417303501

  Columns 51 through 55

   0.003052746113986   0.002775469000010   0.002530610107400   0.002313316424473   0.002119610315285

  Columns 56 through 60

   0.001946210402717   0.001790408524324   0.001649932382104   0.001522872227686   0.001407622904963

  Column 61

   0.001302810266475

Elapsed time is 41764.202043 seconds.
