# Supplementary material for: An Efficient Design of Systematic Rateless Codes
Source: Hindawi journal article supplement (doi:10.1155/2020/8068414), 2020-05-19
Supplement: f1 [file 8068414.f1.zip › supplementary files/Matlab_code_for_Figure1/BER_by_DDE/仿真结果/BER_by_DDE_rician_rate_1_2_dist2_Ns.txt]

��ǰ�ŵ�Ϊ��˹�ŵ�������gamma=2

EbN0indB_vec =

  Columns 1 through 5

                   0   0.100000000000000   0.200000000000000   0.300000000000000   0.400000000000000

  Columns 6 through 10

   0.500000000000000   0.600000000000000   0.700000000000000   0.800000000000000   0.900000000000000

  Columns 11 through 15

   1.000000000000000   1.100000000000000   1.200000000000000   1.300000000000000   1.400000000000000

  Columns 16 through 20

   1.500000000000000   1.600000000000000   1.700000000000000   1.800000000000000   1.900000000000000

  Columns 21 through 25

   2.000000000000000   2.100000000000000   2.200000000000000   2.300000000000000   2.400000000000000

  Columns 26 through 30

   2.500000000000000   2.600000000000000   2.700000000000000   2.800000000000000   2.900000000000000

  Columns 31 through 35

   3.000000000000000   3.100000000000000   3.200000000000000   3.300000000000000   3.400000000000000

  Columns 36 through 40

   3.500000000000000   3.600000000000000   3.700000000000000   3.800000000000000   3.900000000000000

  Columns 41 through 45

   4.000000000000000   4.100000000000000   4.200000000000000   4.300000000000000   4.400000000000000

  Columns 46 through 50

   4.500000000000000   4.600000000000000   4.700000000000000   4.800000000000000   4.900000000000000

  Columns 51 through 55

   5.000000000000000   5.100000000000000   5.200000000000000   5.300000000000000   5.400000000000000

  Columns 56 through 60

   5.500000000000000   5.600000000000000   5.700000000000000   5.800000000000000   5.900000000000000

  Column 61

   6.000000000000000

�Ʊ��ɹ�
��ǰѡ��Raptor��
��ǰѡ���ϵͳ��
������=0.50000, ��������=0.98039, ��������=0.51000

out_node_index =

     1     2     3     8     9    60


ans =

  Columns 1 through 5

   0.004770000000000   0.261010000000000   0.092400000000000   0.069130000000000   0.512230000000000

  Column 6

   0.060460000000000


inner_code_BER =

  Columns 1 through 5

   0.492463721036860                   0                   0                   0                   0

  Columns 6 through 10

                   0                   0                   0                   0                   0

  Columns 11 through 15

                   0                   0                   0                   0                   0

  Columns 16 through 20

                   0                   0                   0                   0                   0

  Columns 21 through 25

                   0                   0                   0                   0                   0

  Columns 26 through 30

                   0                   0                   0                   0                   0

  Columns 31 through 35

                   0                   0                   0                   0                   0

  Columns 36 through 40

                   0                   0                   0                   0                   0

  Columns 41 through 45

                   0                   0                   0                   0                   0

  Columns 46 through 50

                   0                   0                   0                   0                   0

  Columns 51 through 55

                   0                   0                   0                   0                   0

  Columns 56 through 60

                   0                   0                   0                   0                   0

  Column 61

                   0


outer_code_BER =

  Columns 1 through 5

   0.492463721036860                   0                   0                   0                   0

  Columns 6 through 10

                   0                   0                   0                   0                   0

  Columns 11 through 15

                   0                   0                   0                   0                   0

  Columns 16 through 20

                   0                   0                   0                   0                   0

  Columns 21 through 25

                   0                   0                   0                   0                   0

  Columns 26 through 30

                   0                   0                   0                   0                   0

  Columns 31 through 35

                   0                   0                   0                   0                   0

  Columns 36 through 40

                   0                   0                   0                   0                   0

  Columns 41 through 45

                   0                   0                   0                   0                   0

  Columns 46 through 50

                   0                   0                   0                   0                   0

  Columns 51 through 55

                   0                   0                   0                   0                   0

  Columns 56 through 60

                   0                   0                   0                   0                   0

  Column 61

                   0


inner_code_BER =

  Columns 1 through 5

   0.492463721036860   0.492305624090013                   0                   0                   0

  Columns 6 through 10

                   0                   0                   0                   0                   0

  Columns 11 through 15

                   0                   0                   0                   0                   0

  Columns 16 through 20

                   0                   0                   0                   0                   0

  Columns 21 through 25

                   0                   0                   0                   0                   0

  Columns 26 through 30

                   0                   0                   0                   0                   0

  Columns 31 through 35

                   0                   0                   0                   0                   0

  Columns 36 through 40

                   0                   0                   0                   0                   0

  Columns 41 through 45

                   0                   0                   0                   0                   0

  Columns 46 through 50

                   0                   0                   0                   0                   0

  Columns 51 through 55

                   0                   0                   0                   0                   0

  Columns 56 through 60

                   0                   0                   0                   0                   0

  Column 61

                   0


outer_code_BER =

  Columns 1 through 5

   0.492463721036860   0.492305624090013                   0                   0                   0

  Columns 6 through 10

                   0                   0                   0                   0                   0

  Columns 11 through 15

                   0                   0                   0                   0                   0

  Columns 16 through 20

                   0                   0                   0                   0                   0

  Columns 21 through 25

                   0                   0                   0                   0                   0

  Columns 26 through 30

                   0                   0                   0                   0                   0

  Columns 31 through 35

                   0                   0                   0                   0                   0

  Columns 36 through 40

                   0                   0                   0                   0                   0

  Columns 41 through 45

                   0                   0                   0                   0                   0

  Columns 46 through 50

                   0                   0                   0                   0                   0

  Columns 51 through 55

                   0                   0                   0                   0                   0

  Columns 56 through 60

                   0                   0                   0                   0                   0

  Column 61

                   0


inner_code_BER =

  Columns 1 through 5

   0.492463721036860   0.492305624090013   0.492143457779252                   0                   0

  Columns 6 through 10

                   0                   0                   0                   0                   0

  Columns 11 through 15

                   0                   0                   0                   0                   0

  Columns 16 through 20

                   0                   0                   0                   0                   0

  Columns 21 through 25

                   0                   0                   0                   0                   0

  Columns 26 through 30

                   0                   0                   0                   0                   0

  Columns 31 through 35

                   0                   0                   0                   0                   0

  Columns 36 through 40

                   0                   0                   0                   0                   0

  Columns 41 through 45

                   0                   0                   0                   0                   0

  Columns 46 through 50

                   0                   0                   0                   0                   0

  Columns 51 through 55

                   0                   0                   0                   0                   0

  Columns 56 through 60

                   0                   0                   0                   0                   0

  Column 61

                   0


outer_code_BER =

  Columns 1 through 5

   0.492463721036860   0.492305624090013   0.492143457779253                   0                   0

  Columns 6 through 10

                   0                   0                   0                   0                   0

  Columns 11 through 15

                   0                   0                   0                   0                   0

  Columns 16 through 20

                   0                   0                   0                   0                   0

  Columns 21 through 25

                   0                   0                   0                   0                   0

  Columns 26 through 30

                   0                   0                   0                   0                   0

  Columns 31 through 35

                   0                   0                   0                   0                   0

  Columns 36 through 40

                   0                   0                   0                   0                   0

  Columns 41 through 45

                   0                   0                   0                   0                   0

  Columns 46 through 50

                   0                   0                   0                   0                   0

  Columns 51 through 55

                   0                   0                   0                   0                   0

  Columns 56 through 60

                   0                   0                   0                   0                   0

  Column 61

                   0


inner_code_BER =

  Columns 1 through 5

   0.492463721036860   0.492305624090013   0.492143457779252   0.491977111159506                   0

  Columns 6 through 10

                   0                   0                   0                   0                   0

  Columns 11 through 15

                   0                   0                   0                   0                   0

  Columns 16 through 20

                   0                   0                   0                   0                   0

  Columns 21 through 25

                   0                   0                   0                   0                   0

  Columns 26 through 30

                   0                   0                   0                   0                   0

  Columns 31 through 35

                   0                   0                   0                   0                   0

  Columns 36 through 40

                   0                   0                   0                   0                   0

  Columns 41 through 45

                   0                   0                   0                   0                   0

  Columns 46 through 50

                   0                   0                   0                   0                   0

  Columns 51 through 55

                   0                   0                   0                   0                   0

  Columns 56 through 60

                   0                   0                   0                   0                   0

  Column 61

                   0


outer_code_BER =

  Columns 1 through 5

   0.492463721036860   0.492305624090013   0.492143457779253   0.491977111159506                   0

  Columns 6 through 10

                   0                   0                   0                   0                   0

  Columns 11 through 15

                   0                   0                   0                   0                   0

  Columns 16 through 20

                   0                   0                   0                   0                   0

  Columns 21 through 25

                   0                   0                   0                   0                   0

  Columns 26 through 30

                   0                   0                   0                   0                   0

  Columns 31 through 35

                   0                   0                   0                   0                   0

  Columns 36 through 40

                   0                   0                   0                   0                   0

  Columns 41 through 45

                   0                   0                   0                   0                   0

  Columns 46 through 50

                   0                   0                   0                   0                   0

  Columns 51 through 55

                   0                   0                   0                   0                   0

  Columns 56 through 60

                   0                   0                   0                   0                   0

  Column 61

                   0


inner_code_BER =

  Columns 1 through 5

   0.492463721036860   0.492305624090013   0.492143457779252   0.491977111159506   0.491806455326686

  Columns 6 through 10

                   0                   0                   0                   0                   0

  Columns 11 through 15

                   0                   0                   0                   0                   0

  Columns 16 through 20

                   0                   0                   0                   0                   0

  Columns 21 through 25

                   0                   0                   0                   0                   0

  Columns 26 through 30

                   0                   0                   0                   0                   0

  Columns 31 through 35

                   0                   0                   0                   0                   0

  Columns 36 through 40

                   0                   0                   0                   0                   0

  Columns 41 through 45

                   0                   0                   0                   0                   0

  Columns 46 through 50

                   0                   0                   0                   0                   0

  Columns 51 through 55

                   0                   0                   0                   0                   0

  Columns 56 through 60

                   0                   0                   0                   0                   0

  Column 61

                   0


outer_code_BER =

  Columns 1 through 5

   0.492463721036860   0.492305624090013   0.492143457779253   0.491977111159506   0.491806455326686

  Columns 6 through 10

                   0                   0                   0                   0                   0

  Columns 11 through 15

                   0                   0                   0                   0                   0

  Columns 16 through 20

                   0                   0                   0                   0                   0

  Columns 21 through 25

                   0                   0                   0                   0                   0

  Columns 26 through 30

                   0                   0                   0                   0                   0

  Columns 31 through 35

                   0                   0                   0                   0                   0

  Columns 36 through 40

                   0                   0                   0                   0                   0

  Columns 41 through 45

                   0                   0                   0                   0                   0

  Columns 46 through 50

                   0                   0                   0                   0                   0

  Columns 51 through 55

                   0                   0                   0                   0                   0

  Columns 56 through 60

                   0                   0                   0                   0                   0

  Column 61

                   0


inner_code_BER =

  Columns 1 through 5

   0.492463721036860   0.492305624090013   0.492143457779252   0.491977111159506   0.491806455326686

  Columns 6 through 10

   0.491631355105376                   0                   0                   0                   0

  Columns 11 through 15

                   0                   0                   0                   0                   0

  Columns 16 through 20

                   0                   0                   0                   0                   0

  Columns 21 through 25

                   0                   0                   0                   0                   0

  Columns 26 through 30

                   0                   0                   0                   0                   0

  Columns 31 through 35

                   0                   0                   0                   0                   0

  Columns 36 through 40

                   0                   0                   0                   0                   0

  Columns 41 through 45

                   0                   0                   0                   0                   0

  Columns 46 through 50

                   0                   0                   0                   0                   0

  Columns 51 through 55

                   0                   0                   0                   0                   0

  Columns 56 through 60

                   0                   0                   0                   0                   0

  Column 61

                   0


outer_code_BER =

  Columns 1 through 5

   0.492463721036860   0.492305624090013   0.492143457779253   0.491977111159506   0.491806455326686

  Columns 6 through 10

   0.491631355105376                   0                   0                   0                   0

  Columns 11 through 15

                   0                   0                   0                   0                   0

  Columns 16 through 20

                   0                   0                   0                   0                   0

  Columns 21 through 25

                   0                   0                   0                   0                   0

  Columns 26 through 30

                   0                   0                   0                   0                   0

  Columns 31 through 35

                   0                   0                   0                   0                   0

  Columns 36 through 40

                   0                   0                   0                   0                   0

  Columns 41 through 45

                   0                   0                   0                   0                   0

  Columns 46 through 50

                   0                   0                   0                   0                   0

  Columns 51 through 55

                   0                   0                   0                   0                   0

  Columns 56 through 60

                   0                   0                   0                   0                   0

  Column 61

                   0


inner_code_BER =

  Columns 1 through 5

   0.492463721036860   0.492305624090013   0.492143457779252   0.491977111159506   0.491806455326686

  Columns 6 through 10

   0.491631355105376   0.491451689459978                   0                   0                   0

  Columns 11 through 15

                   0                   0                   0                   0                   0

  Columns 16 through 20

                   0                   0                   0                   0                   0

  Columns 21 through 25

                   0                   0                   0                   0                   0

  Columns 26 through 30

                   0                   0                   0                   0                   0

  Columns 31 through 35

                   0                   0                   0                   0                   0

  Columns 36 through 40

                   0                   0                   0                   0                   0

  Columns 41 through 45

                   0                   0                   0                   0                   0

  Columns 46 through 50

                   0                   0                   0                   0                   0

  Columns 51 through 55

                   0                   0                   0                   0                   0

  Columns 56 through 60

                   0                   0                   0                   0                   0

  Column 61

                   0


outer_code_BER =

  Columns 1 through 5

   0.492463721036860   0.492305624090013   0.492143457779253   0.491977111159506   0.491806455326686

  Columns 6 through 10

   0.491631355105376   0.491451689459979                   0                   0                   0

  Columns 11 through 15

                   0                   0                   0                   0                   0

  Columns 16 through 20

                   0                   0                   0                   0                   0

  Columns 21 through 25

                   0                   0                   0                   0                   0

  Columns 26 through 30

                   0                   0                   0                   0                   0

  Columns 31 through 35

                   0                   0                   0                   0                   0

  Columns 36 through 40

                   0                   0                   0                   0                   0

  Columns 41 through 45

                   0                   0                   0                   0                   0

  Columns 46 through 50

                   0                   0                   0                   0                   0

  Columns 51 through 55

                   0                   0                   0                   0                   0

  Columns 56 through 60

                   0                   0                   0                   0                   0

  Column 61

                   0


inner_code_BER =

  Columns 1 through 5

   0.492463721036860   0.492305624090013   0.492143457779252   0.491977111159506   0.491806455326686

  Columns 6 through 10

   0.491631355105376   0.491451689459978   0.491267310275440                   0                   0

  Columns 11 through 15

                   0                   0                   0                   0                   0

  Columns 16 through 20

                   0                   0                   0                   0                   0

  Columns 21 through 25

                   0                   0                   0                   0                   0

  Columns 26 through 30

                   0                   0                   0                   0                   0

  Columns 31 through 35

                   0                   0                   0                   0                   0

  Columns 36 through 40

                   0                   0                   0                   0                   0

  Columns 41 through 45

                   0                   0                   0                   0                   0

  Columns 46 through 50

                   0                   0                   0                   0                   0

  Columns 51 through 55

                   0                   0                   0                   0                   0

  Columns 56 through 60

                   0                   0                   0                   0                   0

  Column 61

                   0


outer_code_BER =

  Columns 1 through 5

   0.492463721036860   0.492305624090013   0.492143457779253   0.491977111159506   0.491806455326686

  Columns 6 through 10

   0.491631355105376   0.491451689459979   0.491267310275441                   0                   0

  Columns 11 through 15

                   0                   0                   0                   0                   0

  Columns 16 through 20

                   0                   0                   0                   0                   0

  Columns 21 through 25

                   0                   0                   0                   0                   0

  Columns 26 through 30

                   0                   0                   0                   0                   0

  Columns 31 through 35

                   0                   0                   0                   0                   0

  Columns 36 through 40

                   0                   0                   0                   0                   0

  Columns 41 through 45

                   0                   0                   0                   0                   0

  Columns 46 through 50

                   0                   0                   0                   0                   0

  Columns 51 through 55

                   0                   0                   0                   0                   0

  Columns 56 through 60

                   0                   0                   0                   0                   0

  Column 61

                   0


inner_code_BER =

  Columns 1 through 5

   0.492463721036860   0.492305624090013   0.492143457779252   0.491977111159506   0.491806455326686

  Columns 6 through 10

   0.491631355105376   0.491451689459978   0.491267310275440   0.491078087177335                   0

  Columns 11 through 15

                   0                   0                   0                   0                   0

  Columns 16 through 20

                   0                   0                   0                   0                   0

  Columns 21 through 25

                   0                   0                   0                   0                   0

  Columns 26 through 30

                   0                   0                   0                   0                   0

  Columns 31 through 35

                   0                   0                   0                   0                   0

  Columns 36 through 40

                   0                   0                   0                   0                   0

  Columns 41 through 45

                   0                   0                   0                   0                   0

  Columns 46 through 50

                   0                   0                   0                   0                   0

  Columns 51 through 55

                   0                   0                   0                   0                   0

  Columns 56 through 60

                   0                   0                   0                   0                   0

  Column 61

                   0


outer_code_BER =

  Columns 1 through 5

   0.492463721036860   0.492305624090013   0.492143457779253   0.491977111159506   0.491806455326686

  Columns 6 through 10

   0.491631355105376   0.491451689459979   0.491267310275441   0.491078087177335                   0

  Columns 11 through 15

                   0                   0                   0                   0                   0

  Columns 16 through 20

                   0                   0                   0                   0                   0

  Columns 21 through 25

                   0                   0                   0                   0                   0

  Columns 26 through 30

                   0                   0                   0                   0                   0

  Columns 31 through 35

                   0                   0                   0                   0                   0

  Columns 36 through 40

                   0                   0                   0                   0                   0

  Columns 41 through 45

                   0                   0                   0                   0                   0

  Columns 46 through 50

                   0                   0                   0                   0                   0

  Columns 51 through 55

                   0                   0                   0                   0                   0

  Columns 56 through 60

                   0                   0                   0                   0                   0

  Column 61

                   0


inner_code_BER =

  Columns 1 through 5

   0.492463721036860   0.492305624090013   0.492143457779252   0.491977111159506   0.491806455326686

  Columns 6 through 10

   0.491631355105376   0.491451689459978   0.491267310275440   0.491078087177335   0.490883863949625

  Columns 11 through 15

                   0                   0                   0                   0                   0

  Columns 16 through 20

                   0                   0                   0                   0                   0

  Columns 21 through 25

                   0                   0                   0                   0                   0

  Columns 26 through 30

                   0                   0                   0                   0                   0

  Columns 31 through 35

                   0                   0                   0                   0                   0

  Columns 36 through 40

                   0                   0                   0                   0                   0

  Columns 41 through 45

                   0                   0                   0                   0                   0

  Columns 46 through 50

                   0                   0                   0                   0                   0

  Columns 51 through 55

                   0                   0                   0                   0                   0

  Columns 56 through 60

                   0                   0                   0                   0                   0

  Column 61

                   0


outer_code_BER =

  Columns 1 through 5

   0.492463721036860   0.492305624090013   0.492143457779253   0.491977111159506   0.491806455326686

  Columns 6 through 10

   0.491631355105376   0.491451689459979   0.491267310275441   0.491078087177335   0.490883863949625

  Columns 11 through 15

                   0                   0                   0                   0                   0

  Columns 16 through 20

                   0                   0                   0                   0                   0

  Columns 21 through 25

                   0                   0                   0                   0                   0

  Columns 26 through 30

                   0                   0                   0                   0                   0

  Columns 31 through 35

                   0                   0                   0                   0                   0

  Columns 36 through 40

                   0                   0                   0                   0                   0

  Columns 41 through 45

                   0                   0                   0                   0                   0

  Columns 46 through 50

                   0                   0                   0                   0                   0

  Columns 51 through 55

                   0                   0                   0                   0                   0

  Columns 56 through 60

                   0                   0                   0                   0                   0

  Column 61

                   0


inner_code_BER =

  Columns 1 through 5

   0.492463721036860   0.492305624090013   0.492143457779252   0.491977111159506   0.491806455326686

  Columns 6 through 10

   0.491631355105376   0.491451689459978   0.491267310275440   0.491078087177335   0.490883863949625

  Columns 11 through 15

   0.490684500711713                   0                   0                   0                   0

  Columns 16 through 20

                   0                   0                   0                   0                   0

  Columns 21 through 25

                   0                   0                   0                   0                   0

  Columns 26 through 30

                   0                   0                   0                   0                   0

  Columns 31 through 35

                   0                   0                   0                   0                   0

  Columns 36 through 40

                   0                   0                   0                   0                   0

  Columns 41 through 45

                   0                   0                   0                   0                   0

  Columns 46 through 50

                   0                   0                   0                   0                   0

  Columns 51 through 55

                   0                   0                   0                   0                   0

  Columns 56 through 60

                   0                   0                   0                   0                   0

  Column 61

                   0


outer_code_BER =

  Columns 1 through 5

   0.492463721036860   0.492305624090013   0.492143457779253   0.491977111159506   0.491806455326686

  Columns 6 through 10

   0.491631355105376   0.491451689459979   0.491267310275441   0.491078087177335   0.490883863949625

  Columns 11 through 15

   0.490684500711713                   0                   0                   0                   0

  Columns 16 through 20

                   0                   0                   0                   0                   0

  Columns 21 through 25

                   0                   0                   0                   0                   0

  Columns 26 through 30

                   0                   0                   0                   0                   0

  Columns 31 through 35

                   0                   0                   0                   0                   0

  Columns 36 through 40

                   0                   0                   0                   0                   0

  Columns 41 through 45

                   0                   0                   0                   0                   0

  Columns 46 through 50

                   0                   0                   0                   0                   0

  Columns 51 through 55

                   0                   0                   0                   0                   0

  Columns 56 through 60

                   0                   0                   0                   0                   0

  Column 61

                   0


inner_code_BER =

  Columns 1 through 5

   0.492463721036860   0.492305624090013   0.492143457779252   0.491977111159506   0.491806455326686

  Columns 6 through 10

   0.491631355105376   0.491451689459978   0.491267310275440   0.491078087177335   0.490883863949625

  Columns 11 through 15

   0.490684500711713   0.490479832319610                   0                   0                   0

  Columns 16 through 20

                   0                   0                   0                   0                   0

  Columns 21 through 25

                   0                   0                   0                   0                   0

  Columns 26 through 30

                   0                   0                   0                   0                   0

  Columns 31 through 35

                   0                   0                   0                   0                   0

  Columns 36 through 40

                   0                   0                   0                   0                   0

  Columns 41 through 45

                   0                   0                   0                   0                   0

  Columns 46 through 50

                   0                   0                   0                   0                   0

  Columns 51 through 55

                   0                   0                   0                   0                   0

  Columns 56 through 60

                   0                   0                   0                   0                   0

  Column 61

                   0


outer_code_BER =

  Columns 1 through 5

   0.492463721036860   0.492305624090013   0.492143457779253   0.491977111159506   0.491806455326686

  Columns 6 through 10

   0.491631355105376   0.491451689459979   0.491267310275441   0.491078087177335   0.490883863949625

  Columns 11 through 15

   0.490684500711713   0.490479832319609                   0                   0                   0

  Columns 16 through 20

                   0                   0                   0                   0                   0

  Columns 21 through 25

                   0                   0                   0                   0                   0

  Columns 26 through 30

                   0                   0                   0                   0                   0

  Columns 31 through 35

                   0                   0                   0                   0                   0

  Columns 36 through 40

                   0                   0                   0                   0                   0

  Columns 41 through 45

                   0                   0                   0                   0                   0

  Columns 46 through 50

                   0                   0                   0                   0                   0

  Columns 51 through 55

                   0                   0                   0                   0                   0

  Columns 56 through 60

                   0                   0                   0                   0                   0

  Column 61

                   0


inner_code_BER =

  Columns 1 through 5

   0.492463721036860   0.492305624090013   0.492143457779252   0.491977111159506   0.491806455326686

  Columns 6 through 10

   0.491631355105376   0.491451689459978   0.491267310275440   0.491078087177335   0.490883863949625

  Columns 11 through 15

   0.490684500711713   0.490479832319610   0.490269709146856                   0                   0

  Columns 16 through 20

                   0                   0                   0                   0                   0

  Columns 21 through 25

                   0                   0                   0                   0                   0

  Columns 26 through 30

                   0                   0                   0                   0                   0

  Columns 31 through 35

                   0                   0                   0                   0                   0

  Columns 36 through 40

                   0                   0                   0                   0                   0

  Columns 41 through 45

                   0                   0                   0                   0                   0

  Columns 46 through 50

                   0                   0                   0                   0                   0

  Columns 51 through 55

                   0                   0                   0                   0                   0

  Columns 56 through 60

                   0                   0                   0                   0                   0

  Column 61

                   0


outer_code_BER =

  Columns 1 through 5

   0.492463721036860   0.492305624090013   0.492143457779253   0.491977111159506   0.491806455326686

  Columns 6 through 10

   0.491631355105376   0.491451689459979   0.491267310275441   0.491078087177335   0.490883863949625

  Columns 11 through 15

   0.490684500711713   0.490479832319609   0.490269709146856                   0                   0

  Columns 16 through 20

                   0                   0                   0                   0                   0

  Columns 21 through 25

                   0                   0                   0                   0                   0

  Columns 26 through 30

                   0                   0                   0                   0                   0

  Columns 31 through 35

                   0                   0                   0                   0                   0

  Columns 36 through 40

                   0                   0                   0                   0                   0

  Columns 41 through 45

                   0                   0                   0                   0                   0

  Columns 46 through 50

                   0                   0                   0                   0                   0

  Columns 51 through 55

                   0                   0                   0                   0                   0

  Columns 56 through 60

                   0                   0                   0                   0                   0

  Column 61

                   0


inner_code_BER =

  Columns 1 through 5

   0.492463721036860   0.492305624090013   0.492143457779252   0.491977111159506   0.491806455326686

  Columns 6 through 10

   0.491631355105376   0.491451689459978   0.491267310275440   0.491078087177335   0.490883863949625

  Columns 11 through 15

   0.490684500711713   0.490479832319610   0.490269709146856   0.490053956316298                   0

  Columns 16 through 20

                   0                   0                   0                   0                   0

  Columns 21 through 25

                   0                   0                   0                   0                   0

  Columns 26 through 30

                   0                   0                   0                   0                   0

  Columns 31 through 35

                   0                   0                   0                   0                   0

  Columns 36 through 40

                   0                   0                   0                   0                   0

  Columns 41 through 45

                   0                   0                   0                   0                   0

  Columns 46 through 50

                   0                   0                   0                   0                   0

  Columns 51 through 55

                   0                   0                   0                   0                   0

  Columns 56 through 60

                   0                   0                   0                   0                   0

  Column 61

                   0


outer_code_BER =

  Columns 1 through 5

   0.492463721036860   0.492305624090013   0.492143457779253   0.491977111159506   0.491806455326686

  Columns 6 through 10

   0.491631355105376   0.491451689459979   0.491267310275441   0.491078087177335   0.490883863949625

  Columns 11 through 15

   0.490684500711713   0.490479832319609   0.490269709146856   0.490053956316298                   0

  Columns 16 through 20

                   0                   0                   0                   0                   0

  Columns 21 through 25

                   0                   0                   0                   0                   0

  Columns 26 through 30

                   0                   0                   0                   0                   0

  Columns 31 through 35

                   0                   0                   0                   0                   0

  Columns 36 through 40

                   0                   0                   0                   0                   0

  Columns 41 through 45

                   0                   0                   0                   0                   0

  Columns 46 through 50

                   0                   0                   0                   0                   0

  Columns 51 through 55

                   0                   0                   0                   0                   0

  Columns 56 through 60

                   0                   0                   0                   0                   0

  Column 61

                   0


inner_code_BER =

  Columns 1 through 5

   0.492463721036860   0.492305624090013   0.492143457779252   0.491977111159506   0.491806455326686

  Columns 6 through 10

   0.491631355105376   0.491451689459978   0.491267310275440   0.491078087177335   0.490883863949625

  Columns 11 through 15

   0.490684500711713   0.490479832319610   0.490269709146856   0.490053956316298   0.489832414170087

  Columns 16 through 20

                   0                   0                   0                   0                   0

  Columns 21 through 25

                   0                   0                   0                   0                   0

  Columns 26 through 30

                   0                   0                   0                   0                   0

  Columns 31 through 35

                   0                   0                   0                   0                   0

  Columns 36 through 40

                   0                   0                   0                   0                   0

  Columns 41 through 45

                   0                   0                   0                   0                   0

  Columns 46 through 50

                   0                   0                   0                   0                   0

  Columns 51 through 55

                   0                   0                   0                   0                   0

  Columns 56 through 60

                   0                   0                   0                   0                   0

  Column 61

                   0


outer_code_BER =

  Columns 1 through 5

   0.492463721036860   0.492305624090013   0.492143457779253   0.491977111159506   0.491806455326686

  Columns 6 through 10

   0.491631355105376   0.491451689459979   0.491267310275441   0.491078087177335   0.490883863949625

  Columns 11 through 15

   0.490684500711713   0.490479832319609   0.490269709146856   0.490053956316298   0.489832414170086

  Columns 16 through 20

                   0                   0                   0                   0                   0

  Columns 21 through 25

                   0                   0                   0                   0                   0

  Columns 26 through 30

                   0                   0                   0                   0                   0

  Columns 31 through 35

                   0                   0                   0                   0                   0

  Columns 36 through 40

                   0                   0                   0                   0                   0

  Columns 41 through 45

                   0                   0                   0                   0                   0

  Columns 46 through 50

                   0                   0                   0                   0                   0

  Columns 51 through 55

                   0                   0                   0                   0                   0

  Columns 56 through 60

                   0                   0                   0                   0                   0

  Column 61

                   0


inner_code_BER =

  Columns 1 through 5

   0.492463721036860   0.492305624090013   0.492143457779252   0.491977111159506   0.491806455326686

  Columns 6 through 10

   0.491631355105376   0.491451689459978   0.491267310275440   0.491078087177335   0.490883863949625

  Columns 11 through 15

   0.490684500711713   0.490479832319610   0.490269709146856   0.490053956316298   0.489832414170087

  Columns 16 through 20

   0.489604897293525                   0                   0                   0                   0

  Columns 21 through 25

                   0                   0                   0                   0                   0

  Columns 26 through 30

                   0                   0                   0                   0                   0

  Columns 31 through 35

                   0                   0                   0                   0                   0

  Columns 36 through 40

                   0                   0                   0                   0                   0

  Columns 41 through 45

                   0                   0                   0                   0                   0

  Columns 46 through 50

                   0                   0                   0                   0                   0

  Columns 51 through 55

                   0                   0                   0                   0                   0

  Columns 56 through 60

                   0                   0                   0                   0                   0

  Column 61

                   0


outer_code_BER =

  Columns 1 through 5

   0.492463721036860   0.492305624090013   0.492143457779253   0.491977111159506   0.491806455326686

  Columns 6 through 10

   0.491631355105376   0.491451689459979   0.491267310275441   0.491078087177335   0.490883863949625

  Columns 11 through 15

   0.490684500711713   0.490479832319609   0.490269709146856   0.490053956316298   0.489832414170086

  Columns 16 through 20

   0.489604897293525                   0                   0                   0                   0

  Columns 21 through 25

                   0                   0                   0                   0                   0

  Columns 26 through 30

                   0                   0                   0                   0                   0

  Columns 31 through 35

                   0                   0                   0                   0                   0

  Columns 36 through 40

                   0                   0                   0                   0                   0

  Columns 41 through 45

                   0                   0                   0                   0                   0

  Columns 46 through 50

                   0                   0                   0                   0                   0

  Columns 51 through 55

                   0                   0                   0                   0                   0

  Columns 56 through 60

                   0                   0                   0                   0                   0

  Column 61

                   0


inner_code_BER =

  Columns 1 through 5

   0.492463721036860   0.492305624090013   0.492143457779252   0.491977111159506   0.491806455326686

  Columns 6 through 10

   0.491631355105376   0.491451689459978   0.491267310275440   0.491078087177335   0.490883863949625

  Columns 11 through 15

   0.490684500711713   0.490479832319610   0.490269709146856   0.490053956316298   0.489832414170087

  Columns 16 through 20

   0.489604897293525   0.489371235687385                   0                   0                   0

  Columns 21 through 25

                   0                   0                   0                   0                   0

  Columns 26 through 30

                   0                   0                   0                   0                   0

  Columns 31 through 35

                   0                   0                   0                   0                   0

  Columns 36 through 40

                   0                   0                   0                   0                   0

  Columns 41 through 45

                   0                   0                   0                   0                   0

  Columns 46 through 50

                   0                   0                   0                   0                   0

  Columns 51 through 55

                   0                   0                   0                   0                   0

  Columns 56 through 60

                   0                   0                   0                   0                   0

  Column 61

                   0


outer_code_BER =

  Columns 1 through 5

   0.492463721036860   0.492305624090013   0.492143457779253   0.491977111159506   0.491806455326686

  Columns 6 through 10

   0.491631355105376   0.491451689459979   0.491267310275441   0.491078087177335   0.490883863949625

  Columns 11 through 15

   0.490684500711713   0.490479832319609   0.490269709146856   0.490053956316298   0.489832414170086

  Columns 16 through 20

   0.489604897293525   0.489371235687385                   0                   0                   0

  Columns 21 through 25

                   0                   0                   0                   0                   0

  Columns 26 through 30

                   0                   0                   0                   0                   0

  Columns 31 through 35

                   0                   0                   0                   0                   0

  Columns 36 through 40

                   0                   0                   0                   0                   0

  Columns 41 through 45

                   0                   0                   0                   0                   0

  Columns 46 through 50

                   0                   0                   0                   0                   0

  Columns 51 through 55

                   0                   0                   0                   0                   0

  Columns 56 through 60

                   0                   0                   0                   0                   0

  Column 61

                   0


inner_code_BER =

  Columns 1 through 5

   0.492463721036860   0.492305624090013   0.492143457779252   0.491977111159506   0.491806455326686

  Columns 6 through 10

   0.491631355105376   0.491451689459978   0.491267310275440   0.491078087177335   0.490883863949625

  Columns 11 through 15

   0.490684500711713   0.490479832319610   0.490269709146856   0.490053956316298   0.489832414170087

  Columns 16 through 20

   0.489604897293525   0.489371235687385   0.489131232579402                   0                   0

  Columns 21 through 25

                   0                   0                   0                   0                   0

  Columns 26 through 30

                   0                   0                   0                   0                   0

  Columns 31 through 35

                   0                   0                   0                   0                   0

  Columns 36 through 40

                   0                   0                   0                   0                   0

  Columns 41 through 45

                   0                   0                   0                   0                   0

  Columns 46 through 50

                   0                   0                   0                   0                   0

  Columns 51 through 55

                   0                   0                   0                   0                   0

  Columns 56 through 60

                   0                   0                   0                   0                   0

  Column 61

                   0


outer_code_BER =

  Columns 1 through 5

   0.492463721036860   0.492305624090013   0.492143457779253   0.491977111159506   0.491806455326686

  Columns 6 through 10

   0.491631355105376   0.491451689459979   0.491267310275441   0.491078087177335   0.490883863949625

  Columns 11 through 15

   0.490684500711713   0.490479832319609   0.490269709146856   0.490053956316298   0.489832414170086

  Columns 16 through 20

   0.489604897293525   0.489371235687385   0.489131232579402                   0                   0

  Columns 21 through 25

                   0                   0                   0                   0                   0

  Columns 26 through 30

                   0                   0                   0                   0                   0

  Columns 31 through 35

                   0                   0                   0                   0                   0

  Columns 36 through 40

                   0                   0                   0                   0                   0

  Columns 41 through 45

                   0                   0                   0                   0                   0

  Columns 46 through 50

                   0                   0                   0                   0                   0

  Columns 51 through 55

                   0                   0                   0                   0                   0

  Columns 56 through 60

                   0                   0                   0                   0                   0

  Column 61

                   0


inner_code_BER =

  Columns 1 through 5

   0.492463721036860   0.492305624090013   0.492143457779252   0.491977111159506   0.491806455326686

  Columns 6 through 10

   0.491631355105376   0.491451689459978   0.491267310275440   0.491078087177335   0.490883863949625

  Columns 11 through 15

   0.490684500711713   0.490479832319610   0.490269709146856   0.490053956316298   0.489832414170087

  Columns 16 through 20

   0.489604897293525   0.489371235687385   0.489131232579402   0.488884707313695                   0

  Columns 21 through 25

                   0                   0                   0                   0                   0

  Columns 26 through 30

                   0                   0                   0                   0                   0

  Columns 31 through 35

                   0                   0                   0                   0                   0

  Columns 36 through 40

                   0                   0                   0                   0                   0

  Columns 41 through 45

                   0                   0                   0                   0                   0

  Columns 46 through 50

                   0                   0                   0                   0                   0

  Columns 51 through 55

                   0                   0                   0                   0                   0

  Columns 56 through 60

                   0                   0                   0                   0                   0

  Column 61

                   0


outer_code_BER =

  Columns 1 through 5

   0.492463721036860   0.492305624090013   0.492143457779253   0.491977111159506   0.491806455326686

  Columns 6 through 10

   0.491631355105376   0.491451689459979   0.491267310275441   0.491078087177335   0.490883863949625

  Columns 11 through 15

   0.490684500711713   0.490479832319609   0.490269709146856   0.490053956316298   0.489832414170086

  Columns 16 through 20

   0.489604897293525   0.489371235687385   0.489131232579402   0.488884707313696                   0

  Columns 21 through 25

                   0                   0                   0                   0                   0

  Columns 26 through 30

                   0                   0                   0                   0                   0

  Columns 31 through 35

                   0                   0                   0                   0                   0

  Columns 36 through 40

                   0                   0                   0                   0                   0

  Columns 41 through 45

                   0                   0                   0                   0                   0

  Columns 46 through 50

                   0                   0                   0                   0                   0

  Columns 51 through 55

                   0                   0                   0                   0                   0

  Columns 56 through 60

                   0                   0                   0                   0                   0

  Column 61

                   0


inner_code_BER =

  Columns 1 through 5

   0.492463721036860   0.492305624090013   0.492143457779252   0.491977111159506   0.491806455326686

  Columns 6 through 10

   0.491631355105376   0.491451689459978   0.491267310275440   0.491078087177335   0.490883863949625

  Columns 11 through 15

   0.490684500711713   0.490479832319610   0.490269709146856   0.490053956316298   0.489832414170087

  Columns 16 through 20

   0.489604897293525   0.489371235687385   0.489131232579402   0.488884707313695   0.488631450910232

  Columns 21 through 25

                   0                   0                   0                   0                   0

  Columns 26 through 30

                   0                   0                   0                   0                   0

  Columns 31 through 35

                   0                   0                   0                   0                   0

  Columns 36 through 40

                   0                   0                   0                   0                   0

  Columns 41 through 45

                   0                   0                   0                   0                   0

  Columns 46 through 50

                   0                   0                   0                   0                   0

  Columns 51 through 55

                   0                   0                   0                   0                   0

  Columns 56 through 60

                   0                   0                   0                   0                   0

  Column 61

                   0


outer_code_BER =

  Columns 1 through 5

   0.492463721036860   0.492305624090013   0.492143457779253   0.491977111159506   0.491806455326686

  Columns 6 through 10

   0.491631355105376   0.491451689459979   0.491267310275441   0.491078087177335   0.490883863949625

  Columns 11 through 15

   0.490684500711713   0.490479832319609   0.490269709146856   0.490053956316298   0.489832414170086

  Columns 16 through 20

   0.489604897293525   0.489371235687385   0.489131232579402   0.488884707313696   0.488631450910233

  Columns 21 through 25

                   0                   0                   0                   0                   0

  Columns 26 through 30

                   0                   0                   0                   0                   0

  Columns 31 through 35

                   0                   0                   0                   0                   0

  Columns 36 through 40

                   0                   0                   0                   0                   0

  Columns 41 through 45

                   0                   0                   0                   0                   0

  Columns 46 through 50

                   0                   0                   0                   0                   0

  Columns 51 through 55

                   0                   0                   0                   0                   0

  Columns 56 through 60

                   0                   0                   0                   0                   0

  Column 61

                   0


inner_code_BER =

  Columns 1 through 5

   0.492463721036860   0.492305624090013   0.492143457779252   0.491977111159506   0.491806455326686

  Columns 6 through 10

   0.491631355105376   0.491451689459978   0.491267310275440   0.491078087177335   0.490883863949625

  Columns 11 through 15

   0.490684500711713   0.490479832319610   0.490269709146856   0.490053956316298   0.489832414170087

  Columns 16 through 20

   0.489604897293525   0.489371235687385   0.489131232579402   0.488884707313695   0.488631450910232

  Columns 21 through 25

   0.488371271754828                   0                   0                   0                   0

  Columns 26 through 30

                   0                   0                   0                   0                   0

  Columns 31 through 35

                   0                   0                   0                   0                   0

  Columns 36 through 40

                   0                   0                   0                   0                   0

  Columns 41 through 45

                   0                   0                   0                   0                   0

  Columns 46 through 50

                   0                   0                   0                   0                   0

  Columns 51 through 55

                   0                   0                   0                   0                   0

  Columns 56 through 60

                   0                   0                   0                   0                   0

  Column 61

                   0


outer_code_BER =

  Columns 1 through 5

   0.492463721036860   0.492305624090013   0.492143457779253   0.491977111159506   0.491806455326686

  Columns 6 through 10

   0.491631355105376   0.491451689459979   0.491267310275441   0.491078087177335   0.490883863949625

  Columns 11 through 15

   0.490684500711713   0.490479832319609   0.490269709146856   0.490053956316298   0.489832414170086

  Columns 16 through 20

   0.489604897293525   0.489371235687385   0.489131232579402   0.488884707313696   0.488631450910233

  Columns 21 through 25

   0.488371271754828                   0                   0                   0                   0

  Columns 26 through 30

                   0                   0                   0                   0                   0

  Columns 31 through 35

                   0                   0                   0                   0                   0

  Columns 36 through 40

                   0                   0                   0                   0                   0

  Columns 41 through 45

                   0                   0                   0                   0                   0

  Columns 46 through 50

                   0                   0                   0                   0                   0

  Columns 51 through 55

                   0                   0                   0                   0                   0

  Columns 56 through 60

                   0                   0                   0                   0                   0

  Column 61

                   0


inner_code_BER =

  Columns 1 through 5

   0.492463721036860   0.492305624090013   0.492143457779252   0.491977111159506   0.491806455326686

  Columns 6 through 10

   0.491631355105376   0.491451689459978   0.491267310275440   0.491078087177335   0.490883863949625

  Columns 11 through 15

   0.490684500711713   0.490479832319610   0.490269709146856   0.490053956316298   0.489832414170087

  Columns 16 through 20

   0.489604897293525   0.489371235687385   0.489131232579402   0.488884707313695   0.488631450910232

  Columns 21 through 25

   0.488371271754828   0.488103947765040                   0                   0                   0

  Columns 26 through 30

                   0                   0                   0                   0                   0

  Columns 31 through 35

                   0                   0                   0                   0                   0

  Columns 36 through 40

                   0                   0                   0                   0                   0

  Columns 41 through 45

                   0                   0                   0                   0                   0

  Columns 46 through 50

                   0                   0                   0                   0                   0

  Columns 51 through 55

                   0                   0                   0                   0                   0

  Columns 56 through 60

                   0                   0                   0                   0                   0

  Column 61

                   0


outer_code_BER =

  Columns 1 through 5

   0.492463721036860   0.492305624090013   0.492143457779253   0.491977111159506   0.491806455326686

  Columns 6 through 10

   0.491631355105376   0.491451689459979   0.491267310275441   0.491078087177335   0.490883863949625

  Columns 11 through 15

   0.490684500711713   0.490479832319609   0.490269709146856   0.490053956316298   0.489832414170086

  Columns 16 through 20

   0.489604897293525   0.489371235687385   0.489131232579402   0.488884707313696   0.488631450910233

  Columns 21 through 25

   0.488371271754828   0.488103947765040                   0                   0                   0

  Columns 26 through 30

                   0                   0                   0                   0                   0

  Columns 31 through 35

                   0                   0                   0                   0                   0

  Columns 36 through 40

                   0                   0                   0                   0                   0

  Columns 41 through 45

                   0                   0                   0                   0                   0

  Columns 46 through 50

                   0                   0                   0                   0                   0

  Columns 51 through 55

                   0                   0                   0                   0                   0

  Columns 56 through 60

                   0                   0                   0                   0                   0

  Column 61

                   0


inner_code_BER =

  Columns 1 through 5

   0.492463721036860   0.492305624090013   0.492143457779252   0.491977111159506   0.491806455326686

  Columns 6 through 10

   0.491631355105376   0.491451689459978   0.491267310275440   0.491078087177335   0.490883863949625

  Columns 11 through 15

   0.490684500711713   0.490479832319610   0.490269709146856   0.490053956316298   0.489832414170087

  Columns 16 through 20

   0.489604897293525   0.489371235687385   0.489131232579402   0.488884707313695   0.488631450910232

  Columns 21 through 25

   0.488371271754828   0.488103947765040   0.487829269759322                   0                   0

  Columns 26 through 30

                   0                   0                   0                   0                   0

  Columns 31 through 35

                   0                   0                   0                   0                   0

  Columns 36 through 40

                   0                   0                   0                   0                   0

  Columns 41 through 45

                   0                   0                   0                   0                   0

  Columns 46 through 50

                   0                   0                   0                   0                   0

  Columns 51 through 55

                   0                   0                   0                   0                   0

  Columns 56 through 60

                   0                   0                   0                   0                   0

  Column 61

                   0


outer_code_BER =

  Columns 1 through 5

   0.492463721036860   0.492305624090013   0.492143457779253   0.491977111159506   0.491806455326686

  Columns 6 through 10

   0.491631355105376   0.491451689459979   0.491267310275441   0.491078087177335   0.490883863949625

  Columns 11 through 15

   0.490684500711713   0.490479832319609   0.490269709146856   0.490053956316298   0.489832414170086

  Columns 16 through 20

   0.489604897293525   0.489371235687385   0.489131232579402   0.488884707313696   0.488631450910233

  Columns 21 through 25

   0.488371271754828   0.488103947765040   0.487829269759323                   0                   0

  Columns 26 through 30

                   0                   0                   0                   0                   0

  Columns 31 through 35

                   0                   0                   0                   0                   0

  Columns 36 through 40

                   0                   0                   0                   0                   0

  Columns 41 through 45

                   0                   0                   0                   0                   0

  Columns 46 through 50

                   0                   0                   0                   0                   0

  Columns 51 through 55

                   0                   0                   0                   0                   0

  Columns 56 through 60

                   0                   0                   0                   0                   0

  Column 61

                   0


inner_code_BER =

  Columns 1 through 5

   0.492463721036860   0.492305624090013   0.492143457779252   0.491977111159506   0.491806455326686

  Columns 6 through 10

   0.491631355105376   0.491451689459978   0.491267310275440   0.491078087177335   0.490883863949625

  Columns 11 through 15

   0.490684500711713   0.490479832319610   0.490269709146856   0.490053956316298   0.489832414170087

  Columns 16 through 20

   0.489604897293525   0.489371235687385   0.489131232579402   0.488884707313695   0.488631450910232

  Columns 21 through 25

   0.488371271754828   0.488103947765040   0.487829269759322   0.487547020622245                   0

  Columns 26 through 30

                   0                   0                   0                   0                   0

  Columns 31 through 35

                   0                   0                   0                   0                   0

  Columns 36 through 40

                   0                   0                   0                   0                   0

  Columns 41 through 45

                   0                   0                   0                   0                   0

  Columns 46 through 50

                   0                   0                   0                   0                   0

  Columns 51 through 55

                   0                   0                   0                   0                   0

  Columns 56 through 60

                   0                   0                   0                   0                   0

  Column 61

                   0


outer_code_BER =

  Columns 1 through 5

   0.492463721036860   0.492305624090013   0.492143457779253   0.491977111159506   0.491806455326686

  Columns 6 through 10

   0.491631355105376   0.491451689459979   0.491267310275441   0.491078087177335   0.490883863949625

  Columns 11 through 15

   0.490684500711713   0.490479832319609   0.490269709146856   0.490053956316298   0.489832414170086

  Columns 16 through 20

   0.489604897293525   0.489371235687385   0.489131232579402   0.488884707313696   0.488631450910233

  Columns 21 through 25

   0.488371271754828   0.488103947765040   0.487829269759323   0.487547020622245                   0

  Columns 26 through 30

                   0                   0                   0                   0                   0

  Columns 31 through 35

                   0                   0                   0                   0                   0

  Columns 36 through 40

                   0                   0                   0                   0                   0

  Columns 41 through 45

                   0                   0                   0                   0                   0

  Columns 46 through 50

                   0                   0                   0                   0                   0

  Columns 51 through 55

                   0                   0                   0                   0                   0

  Columns 56 through 60

                   0                   0                   0                   0                   0

  Column 61

                   0


inner_code_BER =

  Columns 1 through 5

   0.492463721036860   0.492305624090013   0.492143457779252   0.491977111159506   0.491806455326686

  Columns 6 through 10

   0.491631355105376   0.491451689459978   0.491267310275440   0.491078087177335   0.490883863949625

  Columns 11 through 15

   0.490684500711713   0.490479832319610   0.490269709146856   0.490053956316298   0.489832414170087

  Columns 16 through 20

   0.489604897293525   0.489371235687385   0.489131232579402   0.488884707313695   0.488631450910232

  Columns 21 through 25

   0.488371271754828   0.488103947765040   0.487829269759322   0.487547020622245   0.487256959830828

  Columns 26 through 30

                   0                   0                   0                   0                   0

  Columns 31 through 35

                   0                   0                   0                   0                   0

  Columns 36 through 40

                   0                   0                   0                   0                   0

  Columns 41 through 45

                   0                   0                   0                   0                   0

  Columns 46 through 50

                   0                   0                   0                   0                   0

  Columns 51 through 55

                   0                   0                   0                   0                   0

  Columns 56 through 60

                   0                   0                   0                   0                   0

  Column 61

                   0


outer_code_BER =

  Columns 1 through 5

   0.492463721036860   0.492305624090013   0.492143457779253   0.491977111159506   0.491806455326686

  Columns 6 through 10

   0.491631355105376   0.491451689459979   0.491267310275441   0.491078087177335   0.490883863949625

  Columns 11 through 15

   0.490684500711713   0.490479832319609   0.490269709146856   0.490053956316298   0.489832414170086

  Columns 16 through 20

   0.489604897293525   0.489371235687385   0.489131232579402   0.488884707313696   0.488631450910233

  Columns 21 through 25

   0.488371271754828   0.488103947765040   0.487829269759323   0.487547020622245   0.487256959830829

  Columns 26 through 30

                   0                   0                   0                   0                   0

  Columns 31 through 35

                   0                   0                   0                   0                   0

  Columns 36 through 40

                   0                   0                   0                   0                   0

  Columns 41 through 45

                   0                   0                   0                   0                   0

  Columns 46 through 50

                   0                   0                   0                   0                   0

  Columns 51 through 55

                   0                   0                   0                   0                   0

  Columns 56 through 60

                   0                   0                   0                   0                   0

  Column 61

                   0


inner_code_BER =

  Columns 1 through 5

   0.492463721036860   0.492305624090013   0.492143457779252   0.491977111159506   0.491806455326686

  Columns 6 through 10

   0.491631355105376   0.491451689459978   0.491267310275440   0.491078087177335   0.490883863949625

  Columns 11 through 15

   0.490684500711713   0.490479832319610   0.490269709146856   0.490053956316298   0.489832414170087

  Columns 16 through 20

   0.489604897293525   0.489371235687385   0.489131232579402   0.488884707313695   0.488631450910232

  Columns 21 through 25

   0.488371271754828   0.488103947765040   0.487829269759322   0.487547020622245   0.487256959830828

  Columns 26 through 30

   0.486958864163205                   0                   0                   0                   0

  Columns 31 through 35

                   0                   0                   0                   0                   0

  Columns 36 through 40

                   0                   0                   0                   0                   0

  Columns 41 through 45

                   0                   0                   0                   0                   0

  Columns 46 through 50

                   0                   0                   0                   0                   0

  Columns 51 through 55

                   0                   0                   0                   0                   0

  Columns 56 through 60

                   0                   0                   0                   0                   0

  Column 61

                   0


outer_code_BER =

  Columns 1 through 5

   0.492463721036860   0.492305624090013   0.492143457779253   0.491977111159506   0.491806455326686

  Columns 6 through 10

   0.491631355105376   0.491451689459979   0.491267310275441   0.491078087177335   0.490883863949625

  Columns 11 through 15

   0.490684500711713   0.490479832319609   0.490269709146856   0.490053956316298   0.489832414170086

  Columns 16 through 20

   0.489604897293525   0.489371235687385   0.489131232579402   0.488884707313696   0.488631450910233

  Columns 21 through 25

   0.488371271754828   0.488103947765040   0.487829269759323   0.487547020622245   0.487256959830829

  Columns 26 through 30

   0.486958864163207                   0                   0                   0                   0

  Columns 31 through 35

                   0                   0                   0                   0                   0

  Columns 36 through 40

                   0                   0                   0                   0                   0

  Columns 41 through 45

                   0                   0                   0                   0                   0

  Columns 46 through 50

                   0                   0                   0                   0                   0

  Columns 51 through 55

                   0                   0                   0                   0                   0

  Columns 56 through 60

                   0                   0                   0                   0                   0

  Column 61

                   0


inner_code_BER =

  Columns 1 through 5

   0.492463721036860   0.492305624090013   0.492143457779252   0.491977111159506   0.491806455326686

  Columns 6 through 10

   0.491631355105376   0.491451689459978   0.491267310275440   0.491078087177335   0.490883863949625

  Columns 11 through 15

   0.490684500711713   0.490479832319610   0.490269709146856   0.490053956316298   0.489832414170087

  Columns 16 through 20

   0.489604897293525   0.489371235687385   0.489131232579402   0.488884707313695   0.488631450910232

  Columns 21 through 25

   0.488371271754828   0.488103947765040   0.487829269759322   0.487547020622245   0.487256959830828

  Columns 26 through 30

   0.486958864163205   0.486652477751795                   0                   0                   0

  Columns 31 through 35

                   0                   0                   0                   0                   0

  Columns 36 through 40

                   0                   0                   0                   0                   0

  Columns 41 through 45

                   0                   0                   0                   0                   0

  Columns 46 through 50

                   0                   0                   0                   0                   0

  Columns 51 through 55

                   0                   0                   0                   0                   0

  Columns 56 through 60

                   0                   0                   0                   0                   0

  Column 61

                   0


outer_code_BER =

  Columns 1 through 5

   0.492463721036860   0.492305624090013   0.492143457779253   0.491977111159506   0.491806455326686

  Columns 6 through 10

   0.491631355105376   0.491451689459979   0.491267310275441   0.491078087177335   0.490883863949625

  Columns 11 through 15

   0.490684500711713   0.490479832319609   0.490269709146856   0.490053956316298   0.489832414170086

  Columns 16 through 20

   0.489604897293525   0.489371235687385   0.489131232579402   0.488884707313696   0.488631450910233

  Columns 21 through 25

   0.488371271754828   0.488103947765040   0.487829269759323   0.487547020622245   0.487256959830829

  Columns 26 through 30

   0.486958864163207   0.486652477751795                   0                   0                   0

  Columns 31 through 35

                   0                   0                   0                   0                   0

  Columns 36 through 40

                   0                   0                   0                   0                   0

  Columns 41 through 45

                   0                   0                   0                   0                   0

  Columns 46 through 50

                   0                   0                   0                   0                   0

  Columns 51 through 55

                   0                   0                   0                   0                   0

  Columns 56 through 60

                   0                   0                   0                   0                   0

  Column 61

                   0


inner_code_BER =

  Columns 1 through 5

   0.492463721036860   0.492305624090013   0.492143457779252   0.491977111159506   0.491806455326686

  Columns 6 through 10

   0.491631355105376   0.491451689459978   0.491267310275440   0.491078087177335   0.490883863949625

  Columns 11 through 15

   0.490684500711713   0.490479832319610   0.490269709146856   0.490053956316298   0.489832414170087

  Columns 16 through 20

   0.489604897293525   0.489371235687385   0.489131232579402   0.488884707313695   0.488631450910232

  Columns 21 through 25

   0.488371271754828   0.488103947765040   0.487829269759322   0.487547020622245   0.487256959830828

  Columns 26 through 30

   0.486958864163205   0.486652477751795   0.486337558131008                   0                   0

  Columns 31 through 35

                   0                   0                   0                   0                   0

  Columns 36 through 40

                   0                   0                   0                   0                   0

  Columns 41 through 45

                   0                   0                   0                   0                   0

  Columns 46 through 50

                   0                   0                   0                   0                   0

  Columns 51 through 55

                   0                   0                   0                   0                   0

  Columns 56 through 60

                   0                   0                   0                   0                   0

  Column 61

                   0


outer_code_BER =

  Columns 1 through 5

   0.492463721036860   0.492305624090013   0.492143457779253   0.491977111159506   0.491806455326686

  Columns 6 through 10

   0.491631355105376   0.491451689459979   0.491267310275441   0.491078087177335   0.490883863949625

  Columns 11 through 15

   0.490684500711713   0.490479832319609   0.490269709146856   0.490053956316298   0.489832414170086

  Columns 16 through 20

   0.489604897293525   0.489371235687385   0.489131232579402   0.488884707313696   0.488631450910233

  Columns 21 through 25

   0.488371271754828   0.488103947765040   0.487829269759323   0.487547020622245   0.487256959830829

  Columns 26 through 30

   0.486958864163207   0.486652477751795   0.486337558131008                   0                   0

  Columns 31 through 35

                   0                   0                   0                   0                   0

  Columns 36 through 40

                   0                   0                   0                   0                   0

  Columns 41 through 45

                   0                   0                   0                   0                   0

  Columns 46 through 50

                   0                   0                   0                   0                   0

  Columns 51 through 55

                   0                   0                   0                   0                   0

  Columns 56 through 60

                   0                   0                   0                   0                   0

  Column 61

                   0


inner_code_BER =

  Columns 1 through 5

   0.492463721036860   0.492305624090013   0.492143457779252   0.491977111159506   0.491806455326686

  Columns 6 through 10

   0.491631355105376   0.491451689459978   0.491267310275440   0.491078087177335   0.490883863949625

  Columns 11 through 15

   0.490684500711713   0.490479832319610   0.490269709146856   0.490053956316298   0.489832414170087

  Columns 16 through 20

   0.489604897293525   0.489371235687385   0.489131232579402   0.488884707313695   0.488631450910232

  Columns 21 through 25

   0.488371271754828   0.488103947765040   0.487829269759322   0.487547020622245   0.487256959830828

  Columns 26 through 30

   0.486958864163205   0.486652477751795   0.486337558131008   0.486013854935942                   0

  Columns 31 through 35

                   0                   0                   0                   0                   0

  Columns 36 through 40

                   0                   0                   0                   0                   0

  Columns 41 through 45

                   0                   0                   0                   0                   0

  Columns 46 through 50

                   0                   0                   0                   0                   0

  Columns 51 through 55

                   0                   0                   0                   0                   0

  Columns 56 through 60

                   0                   0                   0                   0                   0

  Column 61

                   0


outer_code_BER =

  Columns 1 through 5

   0.492463721036860   0.492305624090013   0.492143457779253   0.491977111159506   0.491806455326686

  Columns 6 through 10

   0.491631355105376   0.491451689459979   0.491267310275441   0.491078087177335   0.490883863949625

  Columns 11 through 15

   0.490684500711713   0.490479832319609   0.490269709146856   0.490053956316298   0.489832414170086

  Columns 16 through 20

   0.489604897293525   0.489371235687385   0.489131232579402   0.488884707313696   0.488631450910233

  Columns 21 through 25

   0.488371271754828   0.488103947765040   0.487829269759323   0.487547020622245   0.487256959830829

  Columns 26 through 30

   0.486958864163207   0.486652477751795   0.486337558131008   0.486013854935942                   0

  Columns 31 through 35

                   0                   0                   0                   0                   0

  Columns 36 through 40

                   0                   0                   0                   0                   0

  Columns 41 through 45

                   0                   0                   0                   0                   0

  Columns 46 through 50

                   0                   0                   0                   0                   0

  Columns 51 through 55

                   0                   0                   0                   0                   0

  Columns 56 through 60

                   0                   0                   0                   0                   0

  Column 61

                   0


inner_code_BER =

  Columns 1 through 5

   0.492463721036860   0.492305624090013   0.492143457779252   0.491977111159506   0.491806455326686

  Columns 6 through 10

   0.491631355105376   0.491451689459978   0.491267310275440   0.491078087177335   0.490883863949625

  Columns 11 through 15

   0.490684500711713   0.490479832319610   0.490269709146856   0.490053956316298   0.489832414170087

  Columns 16 through 20

   0.489604897293525   0.489371235687385   0.489131232579402   0.488884707313695   0.488631450910232

  Columns 21 through 25

   0.488371271754828   0.488103947765040   0.487829269759322   0.487547020622245   0.487256959830828

  Columns 26 through 30

   0.486958864163205   0.486652477751795   0.486337558131008   0.486013854935942   0.485681090369794

  Columns 31 through 35

                   0                   0                   0                   0                   0

  Columns 36 through 40

                   0                   0                   0                   0                   0

  Columns 41 through 45

                   0                   0                   0                   0                   0

  Columns 46 through 50

                   0                   0                   0                   0                   0

  Columns 51 through 55

                   0                   0                   0                   0                   0

  Columns 56 through 60

                   0                   0                   0                   0                   0

  Column 61

                   0


outer_code_BER =

  Columns 1 through 5

   0.492463721036860   0.492305624090013   0.492143457779253   0.491977111159506   0.491806455326686

  Columns 6 through 10

   0.491631355105376   0.491451689459979   0.491267310275441   0.491078087177335   0.490883863949625

  Columns 11 through 15

   0.490684500711713   0.490479832319609   0.490269709146856   0.490053956316298   0.489832414170086

  Columns 16 through 20

   0.489604897293525   0.489371235687385   0.489131232579402   0.488884707313696   0.488631450910233

  Columns 21 through 25

   0.488371271754828   0.488103947765040   0.487829269759323   0.487547020622245   0.487256959830829

  Columns 26 through 30

   0.486958864163207   0.486652477751795   0.486337558131008   0.486013854935942   0.485681090369794

  Columns 31 through 35

                   0                   0                   0                   0                   0

  Columns 36 through 40

                   0                   0                   0                   0                   0

  Columns 41 through 45

                   0                   0                   0                   0                   0

  Columns 46 through 50

                   0                   0                   0                   0                   0

  Columns 51 through 55

                   0                   0                   0                   0                   0

  Columns 56 through 60

                   0                   0                   0                   0                   0

  Column 61

                   0


inner_code_BER =

  Columns 1 through 5

   0.492463721036860   0.492305624090013   0.492143457779252   0.491977111159506   0.491806455326686

  Columns 6 through 10

   0.491631355105376   0.491451689459978   0.491267310275440   0.491078087177335   0.490883863949625

  Columns 11 through 15

   0.490684500711713   0.490479832319610   0.490269709146856   0.490053956316298   0.489832414170087

  Columns 16 through 20

   0.489604897293525   0.489371235687385   0.489131232579402   0.488884707313695   0.488631450910232

  Columns 21 through 25

   0.488371271754828   0.488103947765040   0.487829269759322   0.487547020622245   0.487256959830828

  Columns 26 through 30

   0.486958864163205   0.486652477751795   0.486337558131008   0.486013854935942   0.485681090369794

  Columns 31 through 35

   0.485339000094631                   0                   0                   0                   0

  Columns 36 through 40

                   0                   0                   0                   0                   0

  Columns 41 through 45

                   0                   0                   0                   0                   0

  Columns 46 through 50

                   0                   0                   0                   0                   0

  Columns 51 through 55

                   0                   0                   0                   0                   0

  Columns 56 through 60

                   0                   0                   0                   0                   0

  Column 61

                   0


outer_code_BER =

  Columns 1 through 5

   0.492463721036860   0.492305624090013   0.492143457779253   0.491977111159506   0.491806455326686

  Columns 6 through 10

   0.491631355105376   0.491451689459979   0.491267310275441   0.491078087177335   0.490883863949625

  Columns 11 through 15

   0.490684500711713   0.490479832319609   0.490269709146856   0.490053956316298   0.489832414170086

  Columns 16 through 20

   0.489604897293525   0.489371235687385   0.489131232579402   0.488884707313696   0.488631450910233

  Columns 21 through 25

   0.488371271754828   0.488103947765040   0.487829269759323   0.487547020622245   0.487256959830829

  Columns 26 through 30

   0.486958864163207   0.486652477751795   0.486337558131008   0.486013854935942   0.485681090369794

  Columns 31 through 35

   0.485339000094631                   0                   0                   0                   0

  Columns 36 through 40

                   0                   0                   0                   0                   0

  Columns 41 through 45

                   0                   0                   0                   0                   0

  Columns 46 through 50

                   0                   0                   0                   0                   0

  Columns 51 through 55

                   0                   0                   0                   0                   0

  Columns 56 through 60

                   0                   0                   0                   0                   0

  Column 61

                   0


inner_code_BER =

  Columns 1 through 5

   0.492463721036860   0.492305624090013   0.492143457779252   0.491977111159506   0.491806455326686

  Columns 6 through 10

   0.491631355105376   0.491451689459978   0.491267310275440   0.491078087177335   0.490883863949625

  Columns 11 through 15

   0.490684500711713   0.490479832319610   0.490269709146856   0.490053956316298   0.489832414170087

  Columns 16 through 20

   0.489604897293525   0.489371235687385   0.489131232579402   0.488884707313695   0.488631450910232

  Columns 21 through 25

   0.488371271754828   0.488103947765040   0.487829269759322   0.487547020622245   0.487256959830828

  Columns 26 through 30

   0.486958864163205   0.486652477751795   0.486337558131008   0.486013854935942   0.485681090369794

  Columns 31 through 35

   0.485339000094631   0.484987304841678                   0                   0                   0

  Columns 36 through 40

                   0                   0                   0                   0                   0

  Columns 41 through 45

                   0                   0                   0                   0                   0

  Columns 46 through 50

                   0                   0                   0                   0                   0

  Columns 51 through 55

                   0                   0                   0                   0                   0

  Columns 56 through 60

                   0                   0                   0                   0                   0

  Column 61

                   0


outer_code_BER =

  Columns 1 through 5

   0.492463721036860   0.492305624090013   0.492143457779253   0.491977111159506   0.491806455326686

  Columns 6 through 10

   0.491631355105376   0.491451689459979   0.491267310275441   0.491078087177335   0.490883863949625

  Columns 11 through 15

   0.490684500711713   0.490479832319609   0.490269709146856   0.490053956316298   0.489832414170086

  Columns 16 through 20

   0.489604897293525   0.489371235687385   0.489131232579402   0.488884707313696   0.488631450910233

  Columns 21 through 25

   0.488371271754828   0.488103947765040   0.487829269759323   0.487547020622245   0.487256959830829

  Columns 26 through 30

   0.486958864163207   0.486652477751795   0.486337558131008   0.486013854935942   0.485681090369794

  Columns 31 through 35

   0.485339000094631   0.484987304841678                   0                   0                   0

  Columns 36 through 40

                   0                   0                   0                   0                   0

  Columns 41 through 45

                   0                   0                   0                   0                   0

  Columns 46 through 50

                   0                   0                   0                   0                   0

  Columns 51 through 55

                   0                   0                   0                   0                   0

  Columns 56 through 60

                   0                   0                   0                   0                   0

  Column 61

                   0


inner_code_BER =

  Columns 1 through 5

   0.492463721036860   0.492305624090013   0.492143457779252   0.491977111159506   0.491806455326686

  Columns 6 through 10

   0.491631355105376   0.491451689459978   0.491267310275440   0.491078087177335   0.490883863949625

  Columns 11 through 15

   0.490684500711713   0.490479832319610   0.490269709146856   0.490053956316298   0.489832414170087

  Columns 16 through 20

   0.489604897293525   0.489371235687385   0.489131232579402   0.488884707313695   0.488631450910232

  Columns 21 through 25

   0.488371271754828   0.488103947765040   0.487829269759322   0.487547020622245   0.487256959830828

  Columns 26 through 30

   0.486958864163205   0.486652477751795   0.486337558131008   0.486013854935942   0.485681090369794

  Columns 31 through 35

   0.485339000094631   0.484987304841678   0.484625724147835                   0                   0

  Columns 36 through 40

                   0                   0                   0                   0                   0

  Columns 41 through 45

                   0                   0                   0                   0                   0

  Columns 46 through 50

                   0                   0                   0                   0                   0

  Columns 51 through 55

                   0                   0                   0                   0                   0

  Columns 56 through 60

                   0                   0                   0                   0                   0

  Column 61

                   0


outer_code_BER =

  Columns 1 through 5

   0.492463721036860   0.492305624090013   0.492143457779253   0.491977111159506   0.491806455326686

  Columns 6 through 10

   0.491631355105376   0.491451689459979   0.491267310275441   0.491078087177335   0.490883863949625

  Columns 11 through 15

   0.490684500711713   0.490479832319609   0.490269709146856   0.490053956316298   0.489832414170086

  Columns 16 through 20

   0.489604897293525   0.489371235687385   0.489131232579402   0.488884707313696   0.488631450910233

  Columns 21 through 25

   0.488371271754828   0.488103947765040   0.487829269759323   0.487547020622245   0.487256959830829

  Columns 26 through 30

   0.486958864163207   0.486652477751795   0.486337558131008   0.486013854935942   0.485681090369794

  Columns 31 through 35

   0.485339000094631   0.484987304841678   0.484625724147834                   0                   0

  Columns 36 through 40

                   0                   0                   0                   0                   0

  Columns 41 through 45

                   0                   0                   0                   0                   0

  Columns 46 through 50

                   0                   0                   0                   0                   0

  Columns 51 through 55

                   0                   0                   0                   0                   0

  Columns 56 through 60

                   0                   0                   0                   0                   0

  Column 61

                   0


inner_code_BER =

  Columns 1 through 5

   0.492463721036860   0.492305624090013   0.492143457779252   0.491977111159506   0.491806455326686

  Columns 6 through 10

   0.491631355105376   0.491451689459978   0.491267310275440   0.491078087177335   0.490883863949625

  Columns 11 through 15

   0.490684500711713   0.490479832319610   0.490269709146856   0.490053956316298   0.489832414170087

  Columns 16 through 20

   0.489604897293525   0.489371235687385   0.489131232579402   0.488884707313695   0.488631450910232

  Columns 21 through 25

   0.488371271754828   0.488103947765040   0.487829269759322   0.487547020622245   0.487256959830828

  Columns 26 through 30

   0.486958864163205   0.486652477751795   0.486337558131008   0.486013854935942   0.485681090369794

  Columns 31 through 35

   0.485339000094631   0.484987304841678   0.484625724147835   0.484253949469713                   0

  Columns 36 through 40

                   0                   0                   0                   0                   0

  Columns 41 through 45

                   0                   0                   0                   0                   0

  Columns 46 through 50

                   0                   0                   0                   0                   0

  Columns 51 through 55

                   0                   0                   0                   0                   0

  Columns 56 through 60

                   0                   0                   0                   0                   0

  Column 61

                   0


outer_code_BER =

  Columns 1 through 5

   0.492463721036860   0.492305624090013   0.492143457779253   0.491977111159506   0.491806455326686

  Columns 6 through 10

   0.491631355105376   0.491451689459979   0.491267310275441   0.491078087177335   0.490883863949625

  Columns 11 through 15

   0.490684500711713   0.490479832319609   0.490269709146856   0.490053956316298   0.489832414170086

  Columns 16 through 20

   0.489604897293525   0.489371235687385   0.489131232579402   0.488884707313696   0.488631450910233

  Columns 21 through 25

   0.488371271754828   0.488103947765040   0.487829269759323   0.487547020622245   0.487256959830829

  Columns 26 through 30

   0.486958864163207   0.486652477751795   0.486337558131008   0.486013854935942   0.485681090369794

  Columns 31 through 35

   0.485339000094631   0.484987304841678   0.484625724147834   0.484253949469714                   0

  Columns 36 through 40

                   0                   0                   0                   0                   0

  Columns 41 through 45

                   0                   0                   0                   0                   0

  Columns 46 through 50

                   0                   0                   0                   0                   0

  Columns 51 through 55

                   0                   0                   0                   0                   0

  Columns 56 through 60

                   0                   0                   0                   0                   0

  Column 61

                   0


inner_code_BER =

  Columns 1 through 5

   0.492463721036860   0.492305624090013   0.492143457779252   0.491977111159506   0.491806455326686

  Columns 6 through 10

   0.491631355105376   0.491451689459978   0.491267310275440   0.491078087177335   0.490883863949625

  Columns 11 through 15

   0.490684500711713   0.490479832319610   0.490269709146856   0.490053956316298   0.489832414170087

  Columns 16 through 20

   0.489604897293525   0.489371235687385   0.489131232579402   0.488884707313695   0.488631450910232

  Columns 21 through 25

   0.488371271754828   0.488103947765040   0.487829269759322   0.487547020622245   0.487256959830828

  Columns 26 through 30

   0.486958864163205   0.486652477751795   0.486337558131008   0.486013854935942   0.485681090369794

  Columns 31 through 35

   0.485339000094631   0.484987304841678   0.484625724147835   0.484253949469713   0.483871684942484

  Columns 36 through 40

                   0                   0                   0                   0                   0

  Columns 41 through 45

                   0                   0                   0                   0                   0

  Columns 46 through 50

                   0                   0                   0                   0                   0

  Columns 51 through 55

                   0                   0                   0                   0                   0

  Columns 56 through 60

                   0                   0                   0                   0                   0

  Column 61

                   0


outer_code_BER =

  Columns 1 through 5

   0.492463721036860   0.492305624090013   0.492143457779253   0.491977111159506   0.491806455326686

  Columns 6 through 10

   0.491631355105376   0.491451689459979   0.491267310275441   0.491078087177335   0.490883863949625

  Columns 11 through 15

   0.490684500711713   0.490479832319609   0.490269709146856   0.490053956316298   0.489832414170086

  Columns 16 through 20

   0.489604897293525   0.489371235687385   0.489131232579402   0.488884707313696   0.488631450910233

  Columns 21 through 25

   0.488371271754828   0.488103947765040   0.487829269759323   0.487547020622245   0.487256959830829

  Columns 26 through 30

   0.486958864163207   0.486652477751795   0.486337558131008   0.486013854935942   0.485681090369794

  Columns 31 through 35

   0.485339000094631   0.484987304841678   0.484625724147834   0.484253949469714   0.483871684942484

  Columns 36 through 40

                   0                   0                   0                   0                   0

  Columns 41 through 45

                   0                   0                   0                   0                   0

  Columns 46 through 50

                   0                   0                   0                   0                   0

  Columns 51 through 55

                   0                   0                   0                   0                   0

  Columns 56 through 60

                   0                   0                   0                   0                   0

  Column 61

                   0


inner_code_BER =

  Columns 1 through 5

   0.492463721036860   0.492305624090013   0.492143457779252   0.491977111159506   0.491806455326686

  Columns 6 through 10

   0.491631355105376   0.491451689459978   0.491267310275440   0.491078087177335   0.490883863949625

  Columns 11 through 15

   0.490684500711713   0.490479832319610   0.490269709146856   0.490053956316298   0.489832414170087

  Columns 16 through 20

   0.489604897293525   0.489371235687385   0.489131232579402   0.488884707313695   0.488631450910232

  Columns 21 through 25

   0.488371271754828   0.488103947765040   0.487829269759322   0.487547020622245   0.487256959830828

  Columns 26 through 30

   0.486958864163205   0.486652477751795   0.486337558131008   0.486013854935942   0.485681090369794

  Columns 31 through 35

   0.485339000094631   0.484987304841678   0.484625724147835   0.484253949469713   0.483871684942484

  Columns 36 through 40

   0.483478619362372                   0                   0                   0                   0

  Columns 41 through 45

                   0                   0                   0                   0                   0

  Columns 46 through 50

                   0                   0                   0                   0                   0

  Columns 51 through 55

                   0                   0                   0                   0                   0

  Columns 56 through 60

                   0                   0                   0                   0                   0

  Column 61

                   0


outer_code_BER =

  Columns 1 through 5

   0.492463721036860   0.492305624090013   0.492143457779253   0.491977111159506   0.491806455326686

  Columns 6 through 10

   0.491631355105376   0.491451689459979   0.491267310275441   0.491078087177335   0.490883863949625

  Columns 11 through 15

   0.490684500711713   0.490479832319609   0.490269709146856   0.490053956316298   0.489832414170086

  Columns 16 through 20

   0.489604897293525   0.489371235687385   0.489131232579402   0.488884707313696   0.488631450910233

  Columns 21 through 25

   0.488371271754828   0.488103947765040   0.487829269759323   0.487547020622245   0.487256959830829

  Columns 26 through 30

   0.486958864163207   0.486652477751795   0.486337558131008   0.486013854935942   0.485681090369794

  Columns 31 through 35

   0.485339000094631   0.484987304841678   0.484625724147834   0.484253949469714   0.483871684942484

  Columns 36 through 40

   0.483478619362372                   0                   0                   0                   0

  Columns 41 through 45

                   0                   0                   0                   0                   0

  Columns 46 through 50

                   0                   0                   0                   0                   0

  Columns 51 through 55

                   0                   0                   0                   0                   0

  Columns 56 through 60

                   0                   0                   0                   0                   0

  Column 61

                   0


inner_code_BER =

  Columns 1 through 5

   0.492463721036860   0.492305624090013   0.492143457779252   0.491977111159506   0.491806455326686

  Columns 6 through 10

   0.491631355105376   0.491451689459978   0.491267310275440   0.491078087177335   0.490883863949625

  Columns 11 through 15

   0.490684500711713   0.490479832319610   0.490269709146856   0.490053956316298   0.489832414170087

  Columns 16 through 20

   0.489604897293525   0.489371235687385   0.489131232579402   0.488884707313695   0.488631450910232

  Columns 21 through 25

   0.488371271754828   0.488103947765040   0.487829269759322   0.487547020622245   0.487256959830828

  Columns 26 through 30

   0.486958864163205   0.486652477751795   0.486337558131008   0.486013854935942   0.485681090369794

  Columns 31 through 35

   0.485339000094631   0.484987304841678   0.484625724147835   0.484253949469713   0.483871684942484

  Columns 36 through 40

   0.483478619362372   0.483074433194504                   0                   0                   0

  Columns 41 through 45

                   0                   0                   0                   0                   0

  Columns 46 through 50

                   0                   0                   0                   0                   0

  Columns 51 through 55

                   0                   0                   0                   0                   0

  Columns 56 through 60

                   0                   0                   0                   0                   0

  Column 61

                   0


outer_code_BER =

  Columns 1 through 5

   0.492463721036860   0.492305624090013   0.492143457779253   0.491977111159506   0.491806455326686

  Columns 6 through 10

   0.491631355105376   0.491451689459979   0.491267310275441   0.491078087177335   0.490883863949625

  Columns 11 through 15

   0.490684500711713   0.490479832319609   0.490269709146856   0.490053956316298   0.489832414170086

  Columns 16 through 20

   0.489604897293525   0.489371235687385   0.489131232579402   0.488884707313696   0.488631450910233

  Columns 21 through 25

   0.488371271754828   0.488103947765040   0.487829269759323   0.487547020622245   0.487256959830829

  Columns 26 through 30

   0.486958864163207   0.486652477751795   0.486337558131008   0.486013854935942   0.485681090369794

  Columns 31 through 35

   0.485339000094631   0.484987304841678   0.484625724147834   0.484253949469714   0.483871684942484

  Columns 36 through 40

   0.483478619362372   0.483074433194506                   0                   0                   0

  Columns 41 through 45

                   0                   0                   0                   0                   0

  Columns 46 through 50

                   0                   0                   0                   0                   0

  Columns 51 through 55

                   0                   0                   0                   0                   0

  Columns 56 through 60

                   0                   0                   0                   0                   0

  Column 61

                   0


inner_code_BER =

  Columns 1 through 5

   0.492463721036860   0.492305624090013   0.492143457779252   0.491977111159506   0.491806455326686

  Columns 6 through 10

   0.491631355105376   0.491451689459978   0.491267310275440   0.491078087177335   0.490883863949625

  Columns 11 through 15

   0.490684500711713   0.490479832319610   0.490269709146856   0.490053956316298   0.489832414170087

  Columns 16 through 20

   0.489604897293525   0.489371235687385   0.489131232579402   0.488884707313695   0.488631450910232

  Columns 21 through 25

   0.488371271754828   0.488103947765040   0.487829269759322   0.487547020622245   0.487256959830828

  Columns 26 through 30

   0.486958864163205   0.486652477751795   0.486337558131008   0.486013854935942   0.485681090369794

  Columns 31 through 35

   0.485339000094631   0.484987304841678   0.484625724147835   0.484253949469713   0.483871684942484

  Columns 36 through 40

   0.483478619362372   0.483074433194504   0.482658798436794                   0                   0

  Columns 41 through 45

                   0                   0                   0                   0                   0

  Columns 46 through 50

                   0                   0                   0                   0                   0

  Columns 51 through 55

                   0                   0                   0                   0                   0

  Columns 56 through 60

                   0                   0                   0                   0                   0

  Column 61

                   0


outer_code_BER =

  Columns 1 through 5

   0.492463721036860   0.492305624090013   0.492143457779253   0.491977111159506   0.491806455326686

  Columns 6 through 10

   0.491631355105376   0.491451689459979   0.491267310275441   0.491078087177335   0.490883863949625

  Columns 11 through 15

   0.490684500711713   0.490479832319609   0.490269709146856   0.490053956316298   0.489832414170086

  Columns 16 through 20

   0.489604897293525   0.489371235687385   0.489131232579402   0.488884707313696   0.488631450910233

  Columns 21 through 25

   0.488371271754828   0.488103947765040   0.487829269759323   0.487547020622245   0.487256959830829

  Columns 26 through 30

   0.486958864163207   0.486652477751795   0.486337558131008   0.486013854935942   0.485681090369794

  Columns 31 through 35

   0.485339000094631   0.484987304841678   0.484625724147834   0.484253949469714   0.483871684942484

  Columns 36 through 40

   0.483478619362372   0.483074433194506   0.482658798436795                   0                   0

  Columns 41 through 45

                   0                   0                   0                   0                   0

  Columns 46 through 50

                   0                   0                   0                   0                   0

  Columns 51 through 55

                   0                   0                   0                   0                   0

  Columns 56 through 60

                   0                   0                   0                   0                   0

  Column 61

                   0


inner_code_BER =

  Columns 1 through 5

   0.492463721036860   0.492305624090013   0.492143457779252   0.491977111159506   0.491806455326686

  Columns 6 through 10

   0.491631355105376   0.491451689459978   0.491267310275440   0.491078087177335   0.490883863949625

  Columns 11 through 15

   0.490684500711713   0.490479832319610   0.490269709146856   0.490053956316298   0.489832414170087

  Columns 16 through 20

   0.489604897293525   0.489371235687385   0.489131232579402   0.488884707313695   0.488631450910232

  Columns 21 through 25

   0.488371271754828   0.488103947765040   0.487829269759322   0.487547020622245   0.487256959830828

  Columns 26 through 30

   0.486958864163205   0.486652477751795   0.486337558131008   0.486013854935942   0.485681090369794

  Columns 31 through 35

   0.485339000094631   0.484987304841678   0.484625724147835   0.484253949469713   0.483871684942484

  Columns 36 through 40

   0.483478619362372   0.483074433194504   0.482658798436794   0.482231385391802                   0

  Columns 41 through 45

                   0                   0                   0                   0                   0

  Columns 46 through 50

                   0                   0                   0                   0                   0

  Columns 51 through 55

                   0                   0                   0                   0                   0

  Columns 56 through 60

                   0                   0                   0                   0                   0

  Column 61

                   0


outer_code_BER =

  Columns 1 through 5

   0.492463721036860   0.492305624090013   0.492143457779253   0.491977111159506   0.491806455326686

  Columns 6 through 10

   0.491631355105376   0.491451689459979   0.491267310275441   0.491078087177335   0.490883863949625

  Columns 11 through 15

   0.490684500711713   0.490479832319609   0.490269709146856   0.490053956316298   0.489832414170086

  Columns 16 through 20

   0.489604897293525   0.489371235687385   0.489131232579402   0.488884707313696   0.488631450910233

  Columns 21 through 25

   0.488371271754828   0.488103947765040   0.487829269759323   0.487547020622245   0.487256959830829

  Columns 26 through 30

   0.486958864163207   0.486652477751795   0.486337558131008   0.486013854935942   0.485681090369794

  Columns 31 through 35

   0.485339000094631   0.484987304841678   0.484625724147834   0.484253949469714   0.483871684942484

  Columns 36 through 40

   0.483478619362372   0.483074433194506   0.482658798436795   0.482231385391801                   0

  Columns 41 through 45

                   0                   0                   0                   0                   0

  Columns 46 through 50

                   0                   0                   0                   0                   0

  Columns 51 through 55

                   0                   0                   0                   0                   0

  Columns 56 through 60

                   0                   0                   0                   0                   0

  Column 61

                   0


inner_code_BER =

  Columns 1 through 5

   0.492463721036860   0.492305624090013   0.492143457779252   0.491977111159506   0.491806455326686

  Columns 6 through 10

   0.491631355105376   0.491451689459978   0.491267310275440   0.491078087177335   0.490883863949625

  Columns 11 through 15

   0.490684500711713   0.490479832319610   0.490269709146856   0.490053956316298   0.489832414170087

  Columns 16 through 20

   0.489604897293525   0.489371235687385   0.489131232579402   0.488884707313695   0.488631450910232

  Columns 21 through 25

   0.488371271754828   0.488103947765040   0.487829269759322   0.487547020622245   0.487256959830828

  Columns 26 through 30

   0.486958864163205   0.486652477751795   0.486337558131008   0.486013854935942   0.485681090369794

  Columns 31 through 35

   0.485339000094631   0.484987304841678   0.484625724147835   0.484253949469713   0.483871684942484

  Columns 36 through 40

   0.483478619362372   0.483074433194504   0.482658798436794   0.482231385391802   0.481791834768734

  Columns 41 through 45

                   0                   0                   0                   0                   0

  Columns 46 through 50

                   0                   0                   0                   0                   0

  Columns 51 through 55

                   0                   0                   0                   0                   0

  Columns 56 through 60

                   0                   0                   0                   0                   0

  Column 61

                   0


outer_code_BER =

  Columns 1 through 5

   0.492463721036860   0.492305624090013   0.492143457779253   0.491977111159506   0.491806455326686

  Columns 6 through 10

   0.491631355105376   0.491451689459979   0.491267310275441   0.491078087177335   0.490883863949625

  Columns 11 through 15

   0.490684500711713   0.490479832319609   0.490269709146856   0.490053956316298   0.489832414170086

  Columns 16 through 20

   0.489604897293525   0.489371235687385   0.489131232579402   0.488884707313696   0.488631450910233

  Columns 21 through 25

   0.488371271754828   0.488103947765040   0.487829269759323   0.487547020622245   0.487256959830829

  Columns 26 through 30

   0.486958864163207   0.486652477751795   0.486337558131008   0.486013854935942   0.485681090369794

  Columns 31 through 35

   0.485339000094631   0.484987304841678   0.484625724147834   0.484253949469714   0.483871684942484

  Columns 36 through 40

   0.483478619362372   0.483074433194506   0.482658798436795   0.482231385391801   0.481791834768734

  Columns 41 through 45

                   0                   0                   0                   0                   0

  Columns 46 through 50

                   0                   0                   0                   0                   0

  Columns 51 through 55

                   0                   0                   0                   0                   0

  Columns 56 through 60

                   0                   0                   0                   0                   0

  Column 61

                   0


inner_code_BER =

  Columns 1 through 5

   0.492463721036860   0.492305624090013   0.492143457779252   0.491977111159506   0.491806455326686

  Columns 6 through 10

   0.491631355105376   0.491451689459978   0.491267310275440   0.491078087177335   0.490883863949625

  Columns 11 through 15

   0.490684500711713   0.490479832319610   0.490269709146856   0.490053956316298   0.489832414170087

  Columns 16 through 20

   0.489604897293525   0.489371235687385   0.489131232579402   0.488884707313695   0.488631450910232

  Columns 21 through 25

   0.488371271754828   0.488103947765040   0.487829269759322   0.487547020622245   0.487256959830828

  Columns 26 through 30

   0.486958864163205   0.486652477751795   0.486337558131008   0.486013854935942   0.485681090369794

  Columns 31 through 35

   0.485339000094631   0.484987304841678   0.484625724147835   0.484253949469713   0.483871684942484

  Columns 36 through 40

   0.483478619362372   0.483074433194504   0.482658798436794   0.482231385391802   0.481791834768734

  Columns 41 through 45

   0.481339799502567                   0                   0                   0                   0

  Columns 46 through 50

                   0                   0                   0                   0                   0

  Columns 51 through 55

                   0                   0                   0                   0                   0

  Columns 56 through 60

                   0                   0                   0                   0                   0

  Column 61

                   0


outer_code_BER =

  Columns 1 through 5

   0.492463721036860   0.492305624090013   0.492143457779253   0.491977111159506   0.491806455326686

  Columns 6 through 10

   0.491631355105376   0.491451689459979   0.491267310275441   0.491078087177335   0.490883863949625

  Columns 11 through 15

   0.490684500711713   0.490479832319609   0.490269709146856   0.490053956316298   0.489832414170086

  Columns 16 through 20

   0.489604897293525   0.489371235687385   0.489131232579402   0.488884707313696   0.488631450910233

  Columns 21 through 25

   0.488371271754828   0.488103947765040   0.487829269759323   0.487547020622245   0.487256959830829

  Columns 26 through 30

   0.486958864163207   0.486652477751795   0.486337558131008   0.486013854935942   0.485681090369794

  Columns 31 through 35

   0.485339000094631   0.484987304841678   0.484625724147834   0.484253949469714   0.483871684942484

  Columns 36 through 40

   0.483478619362372   0.483074433194506   0.482658798436795   0.482231385391801   0.481791834768734

  Columns 41 through 45

   0.481339799502567                   0                   0                   0                   0

  Columns 46 through 50

                   0                   0                   0                   0                   0

  Columns 51 through 55

                   0                   0                   0                   0                   0

  Columns 56 through 60

                   0                   0                   0                   0                   0

  Column 61

                   0


inner_code_BER =

  Columns 1 through 5

   0.492463721036860   0.492305624090013   0.492143457779252   0.491977111159506   0.491806455326686

  Columns 6 through 10

   0.491631355105376   0.491451689459978   0.491267310275440   0.491078087177335   0.490883863949625

  Columns 11 through 15

   0.490684500711713   0.490479832319610   0.490269709146856   0.490053956316298   0.489832414170087

  Columns 16 through 20

   0.489604897293525   0.489371235687385   0.489131232579402   0.488884707313695   0.488631450910232

  Columns 21 through 25

   0.488371271754828   0.488103947765040   0.487829269759322   0.487547020622245   0.487256959830828

  Columns 26 through 30

   0.486958864163205   0.486652477751795   0.486337558131008   0.486013854935942   0.485681090369794

  Columns 31 through 35

   0.485339000094631   0.484987304841678   0.484625724147835   0.484253949469713   0.483871684942484

  Columns 36 through 40

   0.483478619362372   0.483074433194504   0.482658798436794   0.482231385391802   0.481791834768734

  Columns 41 through 45

   0.481339799502567   0.480874916430820                   0                   0                   0

  Columns 46 through 50

                   0                   0                   0                   0                   0

  Columns 51 through 55

                   0                   0                   0                   0                   0

  Columns 56 through 60

                   0                   0                   0                   0                   0

  Column 61

                   0


outer_code_BER =

  Columns 1 through 5

   0.492463721036860   0.492305624090013   0.492143457779253   0.491977111159506   0.491806455326686

  Columns 6 through 10

   0.491631355105376   0.491451689459979   0.491267310275441   0.491078087177335   0.490883863949625

  Columns 11 through 15

   0.490684500711713   0.490479832319609   0.490269709146856   0.490053956316298   0.489832414170086

  Columns 16 through 20

   0.489604897293525   0.489371235687385   0.489131232579402   0.488884707313696   0.488631450910233

  Columns 21 through 25

   0.488371271754828   0.488103947765040   0.487829269759323   0.487547020622245   0.487256959830829

  Columns 26 through 30

   0.486958864163207   0.486652477751795   0.486337558131008   0.486013854935942   0.485681090369794

  Columns 31 through 35

   0.485339000094631   0.484987304841678   0.484625724147834   0.484253949469714   0.483871684942484

  Columns 36 through 40

   0.483478619362372   0.483074433194506   0.482658798436795   0.482231385391801   0.481791834768734

  Columns 41 through 45

   0.481339799502567   0.480874916430820                   0                   0                   0

  Columns 46 through 50

                   0                   0                   0                   0                   0

  Columns 51 through 55

                   0                   0                   0                   0                   0

  Columns 56 through 60

                   0                   0                   0                   0                   0

  Column 61

                   0


inner_code_BER =

  Columns 1 through 5

   0.492463721036860   0.492305624090013   0.492143457779252   0.491977111159506   0.491806455326686

  Columns 6 through 10

   0.491631355105376   0.491451689459978   0.491267310275440   0.491078087177335   0.490883863949625

  Columns 11 through 15

   0.490684500711713   0.490479832319610   0.490269709146856   0.490053956316298   0.489832414170087

  Columns 16 through 20

   0.489604897293525   0.489371235687385   0.489131232579402   0.488884707313695   0.488631450910232

  Columns 21 through 25

   0.488371271754828   0.488103947765040   0.487829269759322   0.487547020622245   0.487256959830828

  Columns 26 through 30

   0.486958864163205   0.486652477751795   0.486337558131008   0.486013854935942   0.485681090369794

  Columns 31 through 35

   0.485339000094631   0.484987304841678   0.484625724147835   0.484253949469713   0.483871684942484

  Columns 36 through 40

   0.483478619362372   0.483074433194504   0.482658798436794   0.482231385391802   0.481791834768734

  Columns 41 through 45

   0.481339799502567   0.480874916430820   0.480396813301899                   0                   0

  Columns 46 through 50

                   0                   0                   0                   0                   0

  Columns 51 through 55

                   0                   0                   0                   0                   0

  Columns 56 through 60

                   0                   0                   0                   0                   0

  Column 61

                   0


outer_code_BER =

  Columns 1 through 5

   0.492463721036860   0.492305624090013   0.492143457779253   0.491977111159506   0.491806455326686

  Columns 6 through 10

   0.491631355105376   0.491451689459979   0.491267310275441   0.491078087177335   0.490883863949625

  Columns 11 through 15

   0.490684500711713   0.490479832319609   0.490269709146856   0.490053956316298   0.489832414170086

  Columns 16 through 20

   0.489604897293525   0.489371235687385   0.489131232579402   0.488884707313696   0.488631450910233

  Columns 21 through 25

   0.488371271754828   0.488103947765040   0.487829269759323   0.487547020622245   0.487256959830829

  Columns 26 through 30

   0.486958864163207   0.486652477751795   0.486337558131008   0.486013854935942   0.485681090369794

  Columns 31 through 35

   0.485339000094631   0.484987304841678   0.484625724147834   0.484253949469714   0.483871684942484

  Columns 36 through 40

   0.483478619362372   0.483074433194506   0.482658798436795   0.482231385391801   0.481791834768734

  Columns 41 through 45

   0.481339799502567   0.480874916430820   0.480396813301899                   0                   0

  Columns 46 through 50

                   0                   0                   0                   0                   0

  Columns 51 through 55

                   0                   0                   0                   0                   0

  Columns 56 through 60

                   0                   0                   0                   0                   0

  Column 61

                   0


inner_code_BER =

  Columns 1 through 5

   0.492463721036860   0.492305624090013   0.492143457779252   0.491977111159506   0.491806455326686

  Columns 6 through 10

   0.491631355105376   0.491451689459978   0.491267310275440   0.491078087177335   0.490883863949625

  Columns 11 through 15

   0.490684500711713   0.490479832319610   0.490269709146856   0.490053956316298   0.489832414170087

  Columns 16 through 20

   0.489604897293525   0.489371235687385   0.489131232579402   0.488884707313695   0.488631450910232

  Columns 21 through 25

   0.488371271754828   0.488103947765040   0.487829269759322   0.487547020622245   0.487256959830828

  Columns 26 through 30

   0.486958864163205   0.486652477751795   0.486337558131008   0.486013854935942   0.485681090369794

  Columns 31 through 35

   0.485339000094631   0.484987304841678   0.484625724147835   0.484253949469713   0.483871684942484

  Columns 36 through 40

   0.483478619362372   0.483074433194504   0.482658798436794   0.482231385391802   0.481791834768734

  Columns 41 through 45

   0.481339799502567   0.480874916430820   0.480396813301899   0.479905108663208                   0

  Columns 46 through 50

                   0                   0                   0                   0                   0

  Columns 51 through 55

                   0                   0                   0                   0                   0

  Columns 56 through 60

                   0                   0                   0                   0                   0

  Column 61

                   0


outer_code_BER =

  Columns 1 through 5

   0.492463721036860   0.492305624090013   0.492143457779253   0.491977111159506   0.491806455326686

  Columns 6 through 10

   0.491631355105376   0.491451689459979   0.491267310275441   0.491078087177335   0.490883863949625

  Columns 11 through 15

   0.490684500711713   0.490479832319609   0.490269709146856   0.490053956316298   0.489832414170086

  Columns 16 through 20

   0.489604897293525   0.489371235687385   0.489131232579402   0.488884707313696   0.488631450910233

  Columns 21 through 25

   0.488371271754828   0.488103947765040   0.487829269759323   0.487547020622245   0.487256959830829

  Columns 26 through 30

   0.486958864163207   0.486652477751795   0.486337558131008   0.486013854935942   0.485681090369794

  Columns 31 through 35

   0.485339000094631   0.484987304841678   0.484625724147834   0.484253949469714   0.483871684942484

  Columns 36 through 40

   0.483478619362372   0.483074433194506   0.482658798436795   0.482231385391801   0.481791834768734

  Columns 41 through 45

   0.481339799502567   0.480874916430820   0.480396813301899   0.479905108663208                   0

  Columns 46 through 50

                   0                   0                   0                   0                   0

  Columns 51 through 55

                   0                   0                   0                   0                   0

  Columns 56 through 60

                   0                   0                   0                   0                   0

  Column 61

                   0


inner_code_BER =

  Columns 1 through 5

   0.492463721036860   0.492305624090013   0.492143457779252   0.491977111159506   0.491806455326686

  Columns 6 through 10

   0.491631355105376   0.491451689459978   0.491267310275440   0.491078087177335   0.490883863949625

  Columns 11 through 15

   0.490684500711713   0.490479832319610   0.490269709146856   0.490053956316298   0.489832414170087

  Columns 16 through 20

   0.489604897293525   0.489371235687385   0.489131232579402   0.488884707313695   0.488631450910232

  Columns 21 through 25

   0.488371271754828   0.488103947765040   0.487829269759322   0.487547020622245   0.487256959830828

  Columns 26 through 30

   0.486958864163205   0.486652477751795   0.486337558131008   0.486013854935942   0.485681090369794

  Columns 31 through 35

   0.485339000094631   0.484987304841678   0.484625724147835   0.484253949469713   0.483871684942484

  Columns 36 through 40

   0.483478619362372   0.483074433194504   0.482658798436794   0.482231385391802   0.481791834768734

  Columns 41 through 45

   0.481339799502567   0.480874916430820   0.480396813301899   0.479905108663208   0.479399411754299

  Columns 46 through 50

                   0                   0                   0                   0                   0

  Columns 51 through 55

                   0                   0                   0                   0                   0

  Columns 56 through 60

                   0                   0                   0                   0                   0

  Column 61

                   0


outer_code_BER =

  Columns 1 through 5

   0.492463721036860   0.492305624090013   0.492143457779253   0.491977111159506   0.491806455326686

  Columns 6 through 10

   0.491631355105376   0.491451689459979   0.491267310275441   0.491078087177335   0.490883863949625

  Columns 11 through 15

   0.490684500711713   0.490479832319609   0.490269709146856   0.490053956316298   0.489832414170086

  Columns 16 through 20

   0.489604897293525   0.489371235687385   0.489131232579402   0.488884707313696   0.488631450910233

  Columns 21 through 25

   0.488371271754828   0.488103947765040   0.487829269759323   0.487547020622245   0.487256959830829

  Columns 26 through 30

   0.486958864163207   0.486652477751795   0.486337558131008   0.486013854935942   0.485681090369794

  Columns 31 through 35

   0.485339000094631   0.484987304841678   0.484625724147834   0.484253949469714   0.483871684942484

  Columns 36 through 40

   0.483478619362372   0.483074433194506   0.482658798436795   0.482231385391801   0.481791834768734

  Columns 41 through 45

   0.481339799502567   0.480874916430820   0.480396813301899   0.479905108663208   0.479399411754299

  Columns 46 through 50

                   0                   0                   0                   0                   0

  Columns 51 through 55

                   0                   0                   0                   0                   0

  Columns 56 through 60

                   0                   0                   0                   0                   0

  Column 61

                   0


inner_code_BER =

  Columns 1 through 5

   0.492463721036860   0.492305624090013   0.492143457779252   0.491977111159506   0.491806455326686

  Columns 6 through 10

   0.491631355105376   0.491451689459978   0.491267310275440   0.491078087177335   0.490883863949625

  Columns 11 through 15

   0.490684500711713   0.490479832319610   0.490269709146856   0.490053956316298   0.489832414170087

  Columns 16 through 20

   0.489604897293525   0.489371235687385   0.489131232579402   0.488884707313695   0.488631450910232

  Columns 21 through 25

   0.488371271754828   0.488103947765040   0.487829269759322   0.487547020622245   0.487256959830828

  Columns 26 through 30

   0.486958864163205   0.486652477751795   0.486337558131008   0.486013854935942   0.485681090369794

  Columns 31 through 35

   0.485339000094631   0.484987304841678   0.484625724147835   0.484253949469713   0.483871684942484

  Columns 36 through 40

   0.483478619362372   0.483074433194504   0.482658798436794   0.482231385391802   0.481791834768734

  Columns 41 through 45

   0.481339799502567   0.480874916430820   0.480396813301899   0.479905108663208   0.479399411754299

  Columns 46 through 50

   0.478879322405479                   0                   0                   0                   0

  Columns 51 through 55

                   0                   0                   0                   0                   0

  Columns 56 through 60

                   0                   0                   0                   0                   0

  Column 61

                   0


outer_code_BER =

  Columns 1 through 5

   0.492463721036860   0.492305624090013   0.492143457779253   0.491977111159506   0.491806455326686

  Columns 6 through 10

   0.491631355105376   0.491451689459979   0.491267310275441   0.491078087177335   0.490883863949625

  Columns 11 through 15

   0.490684500711713   0.490479832319609   0.490269709146856   0.490053956316298   0.489832414170086

  Columns 16 through 20

   0.489604897293525   0.489371235687385   0.489131232579402   0.488884707313696   0.488631450910233

  Columns 21 through 25

   0.488371271754828   0.488103947765040   0.487829269759323   0.487547020622245   0.487256959830829

  Columns 26 through 30

   0.486958864163207   0.486652477751795   0.486337558131008   0.486013854935942   0.485681090369794

  Columns 31 through 35

   0.485339000094631   0.484987304841678   0.484625724147834   0.484253949469714   0.483871684942484

  Columns 36 through 40

   0.483478619362372   0.483074433194506   0.482658798436795   0.482231385391801   0.481791834768734

  Columns 41 through 45

   0.481339799502567   0.480874916430820   0.480396813301899   0.479905108663208   0.479399411754299

  Columns 46 through 50

   0.478879322405478                   0                   0                   0                   0

  Columns 51 through 55

                   0                   0                   0                   0                   0

  Columns 56 through 60

                   0                   0                   0                   0                   0

  Column 61

                   0


inner_code_BER =

  Columns 1 through 5

   0.492463721036860   0.492305624090013   0.492143457779252   0.491977111159506   0.491806455326686

  Columns 6 through 10

   0.491631355105376   0.491451689459978   0.491267310275440   0.491078087177335   0.490883863949625

  Columns 11 through 15

   0.490684500711713   0.490479832319610   0.490269709146856   0.490053956316298   0.489832414170087

  Columns 16 through 20

   0.489604897293525   0.489371235687385   0.489131232579402   0.488884707313695   0.488631450910232

  Columns 21 through 25

   0.488371271754828   0.488103947765040   0.487829269759322   0.487547020622245   0.487256959830828

  Columns 26 through 30

   0.486958864163205   0.486652477751795   0.486337558131008   0.486013854935942   0.485681090369794

  Columns 31 through 35

   0.485339000094631   0.484987304841678   0.484625724147835   0.484253949469713   0.483871684942484

  Columns 36 through 40

   0.483478619362372   0.483074433194504   0.482658798436794   0.482231385391802   0.481791834768734

  Columns 41 through 45

   0.481339799502567   0.480874916430820   0.480396813301899   0.479905108663208   0.479399411754299

  Columns 46 through 50

   0.478879322405479   0.478344430942167                   0                   0                   0

  Columns 51 through 55

                   0                   0                   0                   0                   0

  Columns 56 through 60

                   0                   0                   0                   0                   0

  Column 61

                   0


outer_code_BER =

  Columns 1 through 5

   0.492463721036860   0.492305624090013   0.492143457779253   0.491977111159506   0.491806455326686

  Columns 6 through 10

   0.491631355105376   0.491451689459979   0.491267310275441   0.491078087177335   0.490883863949625

  Columns 11 through 15

   0.490684500711713   0.490479832319609   0.490269709146856   0.490053956316298   0.489832414170086

  Columns 16 through 20

   0.489604897293525   0.489371235687385   0.489131232579402   0.488884707313696   0.488631450910233

  Columns 21 through 25

   0.488371271754828   0.488103947765040   0.487829269759323   0.487547020622245   0.487256959830829

  Columns 26 through 30

   0.486958864163207   0.486652477751795   0.486337558131008   0.486013854935942   0.485681090369794

  Columns 31 through 35

   0.485339000094631   0.484987304841678   0.484625724147834   0.484253949469714   0.483871684942484

  Columns 36 through 40

   0.483478619362372   0.483074433194506   0.482658798436795   0.482231385391801   0.481791834768734

  Columns 41 through 45

   0.481339799502567   0.480874916430820   0.480396813301899   0.479905108663208   0.479399411754299

  Columns 46 through 50

   0.478879322405478   0.478344430942168                   0                   0                   0

  Columns 51 through 55

                   0                   0                   0                   0                   0

  Columns 56 through 60

                   0                   0                   0                   0                   0

  Column 61

                   0


inner_code_BER =

  Columns 1 through 5

   0.492463721036860   0.492305624090013   0.492143457779252   0.491977111159506   0.491806455326686

  Columns 6 through 10

   0.491631355105376   0.491451689459978   0.491267310275440   0.491078087177335   0.490883863949625

  Columns 11 through 15

   0.490684500711713   0.490479832319610   0.490269709146856   0.490053956316298   0.489832414170087

  Columns 16 through 20

   0.489604897293525   0.489371235687385   0.489131232579402   0.488884707313695   0.488631450910232

  Columns 21 through 25

   0.488371271754828   0.488103947765040   0.487829269759322   0.487547020622245   0.487256959830828

  Columns 26 through 30

   0.486958864163205   0.486652477751795   0.486337558131008   0.486013854935942   0.485681090369794

  Columns 31 through 35

   0.485339000094631   0.484987304841678   0.484625724147835   0.484253949469713   0.483871684942484

  Columns 36 through 40

   0.483478619362372   0.483074433194504   0.482658798436794   0.482231385391802   0.481791834768734

  Columns 41 through 45

   0.481339799502567   0.480874916430820   0.480396813301899   0.479905108663208   0.479399411754299

  Columns 46 through 50

   0.478879322405479   0.478344430942167   0.477794310461096                   0                   0

  Columns 51 through 55

                   0                   0                   0                   0                   0

  Columns 56 through 60

                   0                   0                   0                   0                   0

  Column 61

                   0


outer_code_BER =

  Columns 1 through 5

   0.492463721036860   0.492305624090013   0.492143457779253   0.491977111159506   0.491806455326686

  Columns 6 through 10

   0.491631355105376   0.491451689459979   0.491267310275441   0.491078087177335   0.490883863949625

  Columns 11 through 15

   0.490684500711713   0.490479832319609   0.490269709146856   0.490053956316298   0.489832414170086

  Columns 16 through 20

   0.489604897293525   0.489371235687385   0.489131232579402   0.488884707313696   0.488631450910233

  Columns 21 through 25

   0.488371271754828   0.488103947765040   0.487829269759323   0.487547020622245   0.487256959830829

  Columns 26 through 30

   0.486958864163207   0.486652477751795   0.486337558131008   0.486013854935942   0.485681090369794

  Columns 31 through 35

   0.485339000094631   0.484987304841678   0.484625724147834   0.484253949469714   0.483871684942484

  Columns 36 through 40

   0.483478619362372   0.483074433194506   0.482658798436795   0.482231385391801   0.481791834768734

  Columns 41 through 45

   0.481339799502567   0.480874916430820   0.480396813301899   0.479905108663208   0.479399411754299

  Columns 46 through 50

   0.478879322405478   0.478344430942168   0.477794310461097                   0                   0

  Columns 51 through 55

                   0                   0                   0                   0                   0

  Columns 56 through 60

                   0                   0                   0                   0                   0

  Column 61

                   0


inner_code_BER =

  Columns 1 through 5

   0.492463721036860   0.492305624090013   0.492143457779252   0.491977111159506   0.491806455326686

  Columns 6 through 10

   0.491631355105376   0.491451689459978   0.491267310275440   0.491078087177335   0.490883863949625

  Columns 11 through 15

   0.490684500711713   0.490479832319610   0.490269709146856   0.490053956316298   0.489832414170087

  Columns 16 through 20

   0.489604897293525   0.489371235687385   0.489131232579402   0.488884707313695   0.488631450910232

  Columns 21 through 25

   0.488371271754828   0.488103947765040   0.487829269759322   0.487547020622245   0.487256959830828

  Columns 26 through 30

   0.486958864163205   0.486652477751795   0.486337558131008   0.486013854935942   0.485681090369794

  Columns 31 through 35

   0.485339000094631   0.484987304841678   0.484625724147835   0.484253949469713   0.483871684942484

  Columns 36 through 40

   0.483478619362372   0.483074433194504   0.482658798436794   0.482231385391802   0.481791834768734

  Columns 41 through 45

   0.481339799502567   0.480874916430820   0.480396813301899   0.479905108663208   0.479399411754299

  Columns 46 through 50

   0.478879322405479   0.478344430942167   0.477794310461096   0.477228546907054                   0

  Columns 51 through 55

                   0                   0                   0                   0                   0

  Columns 56 through 60

                   0                   0                   0                   0                   0

  Column 61

                   0


outer_code_BER =

  Columns 1 through 5

   0.492463721036860   0.492305624090013   0.492143457779253   0.491977111159506   0.491806455326686

  Columns 6 through 10

   0.491631355105376   0.491451689459979   0.491267310275441   0.491078087177335   0.490883863949625

  Columns 11 through 15

   0.490684500711713   0.490479832319609   0.490269709146856   0.490053956316298   0.489832414170086

  Columns 16 through 20

   0.489604897293525   0.489371235687385   0.489131232579402   0.488884707313696   0.488631450910233

  Columns 21 through 25

   0.488371271754828   0.488103947765040   0.487829269759323   0.487547020622245   0.487256959830829

  Columns 26 through 30

   0.486958864163207   0.486652477751795   0.486337558131008   0.486013854935942   0.485681090369794

  Columns 31 through 35

   0.485339000094631   0.484987304841678   0.484625724147834   0.484253949469714   0.483871684942484

  Columns 36 through 40

   0.483478619362372   0.483074433194506   0.482658798436795   0.482231385391801   0.481791834768734

  Columns 41 through 45

   0.481339799502567   0.480874916430820   0.480396813301899   0.479905108663208   0.479399411754299

  Columns 46 through 50

   0.478879322405478   0.478344430942168   0.477794310461097   0.477228546907054                   0

  Columns 51 through 55

                   0                   0                   0                   0                   0

  Columns 56 through 60

                   0                   0                   0                   0                   0

  Column 61

                   0


inner_code_BER =

  Columns 1 through 5

   0.492463721036860   0.492305624090013   0.492143457779252   0.491977111159506   0.491806455326686

  Columns 6 through 10

   0.491631355105376   0.491451689459978   0.491267310275440   0.491078087177335   0.490883863949625

  Columns 11 through 15

   0.490684500711713   0.490479832319610   0.490269709146856   0.490053956316298   0.489832414170087

  Columns 16 through 20

   0.489604897293525   0.489371235687385   0.489131232579402   0.488884707313695   0.488631450910232

  Columns 21 through 25

   0.488371271754828   0.488103947765040   0.487829269759322   0.487547020622245   0.487256959830828

  Columns 26 through 30

   0.486958864163205   0.486652477751795   0.486337558131008   0.486013854935942   0.485681090369794

  Columns 31 through 35

   0.485339000094631   0.484987304841678   0.484625724147835   0.484253949469713   0.483871684942484

  Columns 36 through 40

   0.483478619362372   0.483074433194504   0.482658798436794   0.482231385391802   0.481791834768734

  Columns 41 through 45

   0.481339799502567   0.480874916430820   0.480396813301899   0.479905108663208   0.479399411754299

  Columns 46 through 50

   0.478879322405479   0.478344430942167   0.477794310461096   0.477228546907054   0.476646694255507

  Columns 51 through 55

                   0                   0                   0                   0                   0

  Columns 56 through 60

                   0                   0                   0                   0                   0

  Column 61

                   0


outer_code_BER =

  Columns 1 through 5

   0.492463721036860   0.492305624090013   0.492143457779253   0.491977111159506   0.491806455326686

  Columns 6 through 10

   0.491631355105376   0.491451689459979   0.491267310275441   0.491078087177335   0.490883863949625

  Columns 11 through 15

   0.490684500711713   0.490479832319609   0.490269709146856   0.490053956316298   0.489832414170086

  Columns 16 through 20

   0.489604897293525   0.489371235687385   0.489131232579402   0.488884707313696   0.488631450910233

  Columns 21 through 25

   0.488371271754828   0.488103947765040   0.487829269759323   0.487547020622245   0.487256959830829

  Columns 26 through 30

   0.486958864163207   0.486652477751795   0.486337558131008   0.486013854935942   0.485681090369794

  Columns 31 through 35

   0.485339000094631   0.484987304841678   0.484625724147834   0.484253949469714   0.483871684942484

  Columns 36 through 40

   0.483478619362372   0.483074433194506   0.482658798436795   0.482231385391801   0.481791834768734

  Columns 41 through 45

   0.481339799502567   0.480874916430820   0.480396813301899   0.479905108663208   0.479399411754299

  Columns 46 through 50

   0.478879322405478   0.478344430942168   0.477794310461097   0.477228546907054   0.476646694255508

  Columns 51 through 55

                   0                   0                   0                   0                   0

  Columns 56 through 60

                   0                   0                   0                   0                   0

  Column 61

                   0


inner_code_BER =

  Columns 1 through 5

   0.492463721036860   0.492305624090013   0.492143457779252   0.491977111159506   0.491806455326686

  Columns 6 through 10

   0.491631355105376   0.491451689459978   0.491267310275440   0.491078087177335   0.490883863949625

  Columns 11 through 15

   0.490684500711713   0.490479832319610   0.490269709146856   0.490053956316298   0.489832414170087

  Columns 16 through 20

   0.489604897293525   0.489371235687385   0.489131232579402   0.488884707313695   0.488631450910232

  Columns 21 through 25

   0.488371271754828   0.488103947765040   0.487829269759322   0.487547020622245   0.487256959830828

  Columns 26 through 30

   0.486958864163205   0.486652477751795   0.486337558131008   0.486013854935942   0.485681090369794

  Columns 31 through 35

   0.485339000094631   0.484987304841678   0.484625724147835   0.484253949469713   0.483871684942484

  Columns 36 through 40

   0.483478619362372   0.483074433194504   0.482658798436794   0.482231385391802   0.481791834768734

  Columns 41 through 45

   0.481339799502567   0.480874916430820   0.480396813301899   0.479905108663208   0.479399411754299

  Columns 46 through 50

   0.478879322405479   0.478344430942167   0.477794310461096   0.477228546907054   0.476646694255507

  Columns 51 through 55

   0.476048303985156                   0                   0                   0                   0

  Columns 56 through 60

                   0                   0                   0                   0                   0

  Column 61

                   0


outer_code_BER =

  Columns 1 through 5

   0.492463721036860   0.492305624090013   0.492143457779253   0.491977111159506   0.491806455326686

  Columns 6 through 10

   0.491631355105376   0.491451689459979   0.491267310275441   0.491078087177335   0.490883863949625

  Columns 11 through 15

   0.490684500711713   0.490479832319609   0.490269709146856   0.490053956316298   0.489832414170086

  Columns 16 through 20

   0.489604897293525   0.489371235687385   0.489131232579402   0.488884707313696   0.488631450910233

  Columns 21 through 25

   0.488371271754828   0.488103947765040   0.487829269759323   0.487547020622245   0.487256959830829

  Columns 26 through 30

   0.486958864163207   0.486652477751795   0.486337558131008   0.486013854935942   0.485681090369794

  Columns 31 through 35

   0.485339000094631   0.484987304841678   0.484625724147834   0.484253949469714   0.483871684942484

  Columns 36 through 40

   0.483478619362372   0.483074433194506   0.482658798436795   0.482231385391801   0.481791834768734

  Columns 41 through 45

   0.481339799502567   0.480874916430820   0.480396813301899   0.479905108663208   0.479399411754299

  Columns 46 through 50

   0.478879322405478   0.478344430942168   0.477794310461097   0.477228546907054   0.476646694255508

  Columns 51 through 55

   0.476048303985157                   0                   0                   0                   0

  Columns 56 through 60

                   0                   0                   0                   0                   0

  Column 61

                   0


inner_code_BER =

  Columns 1 through 5

   0.492463721036860   0.492305624090013   0.492143457779252   0.491977111159506   0.491806455326686

  Columns 6 through 10

   0.491631355105376   0.491451689459978   0.491267310275440   0.491078087177335   0.490883863949625

  Columns 11 through 15

   0.490684500711713   0.490479832319610   0.490269709146856   0.490053956316298   0.489832414170087

  Columns 16 through 20

   0.489604897293525   0.489371235687385   0.489131232579402   0.488884707313695   0.488631450910232

  Columns 21 through 25

   0.488371271754828   0.488103947765040   0.487829269759322   0.487547020622245   0.487256959830828

  Columns 26 through 30

   0.486958864163205   0.486652477751795   0.486337558131008   0.486013854935942   0.485681090369794

  Columns 31 through 35

   0.485339000094631   0.484987304841678   0.484625724147835   0.484253949469713   0.483871684942484

  Columns 36 through 40

   0.483478619362372   0.483074433194504   0.482658798436794   0.482231385391802   0.481791834768734

  Columns 41 through 45

   0.481339799502567   0.480874916430820   0.480396813301899   0.479905108663208   0.479399411754299

  Columns 46 through 50

   0.478879322405479   0.478344430942167   0.477794310461096   0.477228546907054   0.476646694255507

  Columns 51 through 55

   0.476048303985156   0.475432917699195                   0                   0                   0

  Columns 56 through 60

                   0                   0                   0                   0                   0

  Column 61

                   0


outer_code_BER =

  Columns 1 through 5

   0.492463721036860   0.492305624090013   0.492143457779253   0.491977111159506   0.491806455326686

  Columns 6 through 10

   0.491631355105376   0.491451689459979   0.491267310275441   0.491078087177335   0.490883863949625

  Columns 11 through 15

   0.490684500711713   0.490479832319609   0.490269709146856   0.490053956316298   0.489832414170086

  Columns 16 through 20

   0.489604897293525   0.489371235687385   0.489131232579402   0.488884707313696   0.488631450910233

  Columns 21 through 25

   0.488371271754828   0.488103947765040   0.487829269759323   0.487547020622245   0.487256959830829

  Columns 26 through 30

   0.486958864163207   0.486652477751795   0.486337558131008   0.486013854935942   0.485681090369794

  Columns 31 through 35

   0.485339000094631   0.484987304841678   0.484625724147834   0.484253949469714   0.483871684942484

  Columns 36 through 40

   0.483478619362372   0.483074433194506   0.482658798436795   0.482231385391801   0.481791834768734

  Columns 41 through 45

   0.481339799502567   0.480874916430820   0.480396813301899   0.479905108663208   0.479399411754299

  Columns 46 through 50

   0.478879322405478   0.478344430942168   0.477794310461097   0.477228546907054   0.476646694255508

  Columns 51 through 55

   0.476048303985157   0.475432917699196                   0                   0                   0

  Columns 56 through 60

                   0                   0                   0                   0                   0

  Column 61

                   0


inner_code_BER =

  Columns 1 through 5

   0.492463721036860   0.492305624090013   0.492143457779252   0.491977111159506   0.491806455326686

  Columns 6 through 10

   0.491631355105376   0.491451689459978   0.491267310275440   0.491078087177335   0.490883863949625

  Columns 11 through 15

   0.490684500711713   0.490479832319610   0.490269709146856   0.490053956316298   0.489832414170087

  Columns 16 through 20

   0.489604897293525   0.489371235687385   0.489131232579402   0.488884707313695   0.488631450910232

  Columns 21 through 25

   0.488371271754828   0.488103947765040   0.487829269759322   0.487547020622245   0.487256959830828

  Columns 26 through 30

   0.486958864163205   0.486652477751795   0.486337558131008   0.486013854935942   0.485681090369794

  Columns 31 through 35

   0.485339000094631   0.484987304841678   0.484625724147835   0.484253949469713   0.483871684942484

  Columns 36 through 40

   0.483478619362372   0.483074433194504   0.482658798436794   0.482231385391802   0.481791834768734

  Columns 41 through 45

   0.481339799502567   0.480874916430820   0.480396813301899   0.479905108663208   0.479399411754299

  Columns 46 through 50

   0.478879322405479   0.478344430942167   0.477794310461096   0.477228546907054   0.476646694255507

  Columns 51 through 55

   0.476048303985156   0.475432917699195   0.474800058963450                   0                   0

  Columns 56 through 60

                   0                   0                   0                   0                   0

  Column 61

                   0


outer_code_BER =

  Columns 1 through 5

   0.492463721036860   0.492305624090013   0.492143457779253   0.491977111159506   0.491806455326686

  Columns 6 through 10

   0.491631355105376   0.491451689459979   0.491267310275441   0.491078087177335   0.490883863949625

  Columns 11 through 15

   0.490684500711713   0.490479832319609   0.490269709146856   0.490053956316298   0.489832414170086

  Columns 16 through 20

   0.489604897293525   0.489371235687385   0.489131232579402   0.488884707313696   0.488631450910233

  Columns 21 through 25

   0.488371271754828   0.488103947765040   0.487829269759323   0.487547020622245   0.487256959830829

  Columns 26 through 30

   0.486958864163207   0.486652477751795   0.486337558131008   0.486013854935942   0.485681090369794

  Columns 31 through 35

   0.485339000094631   0.484987304841678   0.484625724147834   0.484253949469714   0.483871684942484

  Columns 36 through 40

   0.483478619362372   0.483074433194506   0.482658798436795   0.482231385391801   0.481791834768734

  Columns 41 through 45

   0.481339799502567   0.480874916430820   0.480396813301899   0.479905108663208   0.479399411754299

  Columns 46 through 50

   0.478879322405478   0.478344430942168   0.477794310461097   0.477228546907054   0.476646694255508

  Columns 51 through 55

   0.476048303985157   0.475432917699196   0.474800058963451                   0                   0

  Columns 56 through 60

                   0                   0                   0                   0                   0

  Column 61

                   0


inner_code_BER =

  Columns 1 through 5

   0.492463721036860   0.492305624090013   0.492143457779252   0.491977111159506   0.491806455326686

  Columns 6 through 10

   0.491631355105376   0.491451689459978   0.491267310275440   0.491078087177335   0.490883863949625

  Columns 11 through 15

   0.490684500711713   0.490479832319610   0.490269709146856   0.490053956316298   0.489832414170087

  Columns 16 through 20

   0.489604897293525   0.489371235687385   0.489131232579402   0.488884707313695   0.488631450910232

  Columns 21 through 25

   0.488371271754828   0.488103947765040   0.487829269759322   0.487547020622245   0.487256959830828

  Columns 26 through 30

   0.486958864163205   0.486652477751795   0.486337558131008   0.486013854935942   0.485681090369794

  Columns 31 through 35

   0.485339000094631   0.484987304841678   0.484625724147835   0.484253949469713   0.483871684942484

  Columns 36 through 40

   0.483478619362372   0.483074433194504   0.482658798436794   0.482231385391802   0.481791834768734

  Columns 41 through 45

   0.481339799502567   0.480874916430820   0.480396813301899   0.479905108663208   0.479399411754299

  Columns 46 through 50

   0.478879322405479   0.478344430942167   0.477794310461096   0.477228546907054   0.476646694255507

  Columns 51 through 55

   0.476048303985156   0.475432917699195   0.474800058963450   0.474149265027633                   0

  Columns 56 through 60

                   0                   0                   0                   0                   0

  Column 61

                   0


outer_code_BER =

  Columns 1 through 5

   0.492463721036860   0.492305624090013   0.492143457779253   0.491977111159506   0.491806455326686

  Columns 6 through 10

   0.491631355105376   0.491451689459979   0.491267310275441   0.491078087177335   0.490883863949625

  Columns 11 through 15

   0.490684500711713   0.490479832319609   0.490269709146856   0.490053956316298   0.489832414170086

  Columns 16 through 20

   0.489604897293525   0.489371235687385   0.489131232579402   0.488884707313696   0.488631450910233

  Columns 21 through 25

   0.488371271754828   0.488103947765040   0.487829269759323   0.487547020622245   0.487256959830829

  Columns 26 through 30

   0.486958864163207   0.486652477751795   0.486337558131008   0.486013854935942   0.485681090369794

  Columns 31 through 35

   0.485339000094631   0.484987304841678   0.484625724147834   0.484253949469714   0.483871684942484

  Columns 36 through 40

   0.483478619362372   0.483074433194506   0.482658798436795   0.482231385391801   0.481791834768734

  Columns 41 through 45

   0.481339799502567   0.480874916430820   0.480396813301899   0.479905108663208   0.479399411754299

  Columns 46 through 50

   0.478879322405478   0.478344430942168   0.477794310461097   0.477228546907054   0.476646694255508

  Columns 51 through 55

   0.476048303985157   0.475432917699196   0.474800058963451   0.474149265027634                   0

  Columns 56 through 60

                   0                   0                   0                   0                   0

  Column 61

                   0


inner_code_BER =

  Columns 1 through 5

   0.492463721036860   0.492305624090013   0.492143457779252   0.491977111159506   0.491806455326686

  Columns 6 through 10

   0.491631355105376   0.491451689459978   0.491267310275440   0.491078087177335   0.490883863949625

  Columns 11 through 15

   0.490684500711713   0.490479832319610   0.490269709146856   0.490053956316298   0.489832414170087

  Columns 16 through 20

   0.489604897293525   0.489371235687385   0.489131232579402   0.488884707313695   0.488631450910232

  Columns 21 through 25

   0.488371271754828   0.488103947765040   0.487829269759322   0.487547020622245   0.487256959830828

  Columns 26 through 30

   0.486958864163205   0.486652477751795   0.486337558131008   0.486013854935942   0.485681090369794

  Columns 31 through 35

   0.485339000094631   0.484987304841678   0.484625724147835   0.484253949469713   0.483871684942484

  Columns 36 through 40

   0.483478619362372   0.483074433194504   0.482658798436794   0.482231385391802   0.481791834768734

  Columns 41 through 45

   0.481339799502567   0.480874916430820   0.480396813301899   0.479905108663208   0.479399411754299

  Columns 46 through 50

   0.478879322405479   0.478344430942167   0.477794310461096   0.477228546907054   0.476646694255507

  Columns 51 through 55

   0.476048303985156   0.475432917699195   0.474800058963450   0.474149265027633   0.473480040130476

  Columns 56 through 60

                   0                   0                   0                   0                   0

  Column 61

                   0


outer_code_BER =

  Columns 1 through 5

   0.492463721036860   0.492305624090013   0.492143457779253   0.491977111159506   0.491806455326686

  Columns 6 through 10

   0.491631355105376   0.491451689459979   0.491267310275441   0.491078087177335   0.490883863949625

  Columns 11 through 15

   0.490684500711713   0.490479832319609   0.490269709146856   0.490053956316298   0.489832414170086

  Columns 16 through 20

   0.489604897293525   0.489371235687385   0.489131232579402   0.488884707313696   0.488631450910233

  Columns 21 through 25

   0.488371271754828   0.488103947765040   0.487829269759323   0.487547020622245   0.487256959830829

  Columns 26 through 30

   0.486958864163207   0.486652477751795   0.486337558131008   0.486013854935942   0.485681090369794

  Columns 31 through 35

   0.485339000094631   0.484987304841678   0.484625724147834   0.484253949469714   0.483871684942484

  Columns 36 through 40

   0.483478619362372   0.483074433194506   0.482658798436795   0.482231385391801   0.481791834768734

  Columns 41 through 45

   0.481339799502567   0.480874916430820   0.480396813301899   0.479905108663208   0.479399411754299

  Columns 46 through 50

   0.478879322405478   0.478344430942168   0.477794310461097   0.477228546907054   0.476646694255508

  Columns 51 through 55

   0.476048303985157   0.475432917699196   0.474800058963451   0.474149265027634   0.473480040130476

  Columns 56 through 60

                   0                   0                   0                   0                   0

  Column 61

                   0


inner_code_BER =

  Columns 1 through 5

   0.492463721036860   0.492305624090013   0.492143457779252   0.491977111159506   0.491806455326686

  Columns 6 through 10

   0.491631355105376   0.491451689459978   0.491267310275440   0.491078087177335   0.490883863949625

  Columns 11 through 15

   0.490684500711713   0.490479832319610   0.490269709146856   0.490053956316298   0.489832414170087

  Columns 16 through 20

   0.489604897293525   0.489371235687385   0.489131232579402   0.488884707313695   0.488631450910232

  Columns 21 through 25

   0.488371271754828   0.488103947765040   0.487829269759322   0.487547020622245   0.487256959830828

  Columns 26 through 30

   0.486958864163205   0.486652477751795   0.486337558131008   0.486013854935942   0.485681090369794

  Columns 31 through 35

   0.485339000094631   0.484987304841678   0.484625724147835   0.484253949469713   0.483871684942484

  Columns 36 through 40

   0.483478619362372   0.483074433194504   0.482658798436794   0.482231385391802   0.481791834768734

  Columns 41 through 45

   0.481339799502567   0.480874916430820   0.480396813301899   0.479905108663208   0.479399411754299

  Columns 46 through 50

   0.478879322405479   0.478344430942167   0.477794310461096   0.477228546907054   0.476646694255507

  Columns 51 through 55

   0.476048303985156   0.475432917699195   0.474800058963450   0.474149265027633   0.473480040130476

  Columns 56 through 60

   0.472791877571248                   0                   0                   0                   0

  Column 61

                   0


outer_code_BER =

  Columns 1 through 5

   0.492463721036860   0.492305624090013   0.492143457779253   0.491977111159506   0.491806455326686

  Columns 6 through 10

   0.491631355105376   0.491451689459979   0.491267310275441   0.491078087177335   0.490883863949625

  Columns 11 through 15

   0.490684500711713   0.490479832319609   0.490269709146856   0.490053956316298   0.489832414170086

  Columns 16 through 20

   0.489604897293525   0.489371235687385   0.489131232579402   0.488884707313696   0.488631450910233

  Columns 21 through 25

   0.488371271754828   0.488103947765040   0.487829269759323   0.487547020622245   0.487256959830829

  Columns 26 through 30

   0.486958864163207   0.486652477751795   0.486337558131008   0.486013854935942   0.485681090369794

  Columns 31 through 35

   0.485339000094631   0.484987304841678   0.484625724147834   0.484253949469714   0.483871684942484

  Columns 36 through 40

   0.483478619362372   0.483074433194506   0.482658798436795   0.482231385391801   0.481791834768734

  Columns 41 through 45

   0.481339799502567   0.480874916430820   0.480396813301899   0.479905108663208   0.479399411754299

  Columns 46 through 50

   0.478879322405478   0.478344430942168   0.477794310461097   0.477228546907054   0.476646694255508

  Columns 51 through 55

   0.476048303985157   0.475432917699196   0.474800058963451   0.474149265027634   0.473480040130476

  Columns 56 through 60

   0.472791877571248                   0                   0                   0                   0

  Column 61

                   0


inner_code_BER =

  Columns 1 through 5

   0.492463721036860   0.492305624090013   0.492143457779252   0.491977111159506   0.491806455326686

  Columns 6 through 10

   0.491631355105376   0.491451689459978   0.491267310275440   0.491078087177335   0.490883863949625

  Columns 11 through 15

   0.490684500711713   0.490479832319610   0.490269709146856   0.490053956316298   0.489832414170087

  Columns 16 through 20

   0.489604897293525   0.489371235687385   0.489131232579402   0.488884707313695   0.488631450910232

  Columns 21 through 25

   0.488371271754828   0.488103947765040   0.487829269759322   0.487547020622245   0.487256959830828

  Columns 26 through 30

   0.486958864163205   0.486652477751795   0.486337558131008   0.486013854935942   0.485681090369794

  Columns 31 through 35

   0.485339000094631   0.484987304841678   0.484625724147835   0.484253949469713   0.483871684942484

  Columns 36 through 40

   0.483478619362372   0.483074433194504   0.482658798436794   0.482231385391802   0.481791834768734

  Columns 41 through 45

   0.481339799502567   0.480874916430820   0.480396813301899   0.479905108663208   0.479399411754299

  Columns 46 through 50

   0.478879322405479   0.478344430942167   0.477794310461096   0.477228546907054   0.476646694255507

  Columns 51 through 55

   0.476048303985156   0.475432917699195   0.474800058963450   0.474149265027633   0.473480040130476

  Columns 56 through 60

   0.472791877571248   0.472084285156739                   0                   0                   0

  Column 61

                   0


outer_code_BER =

  Columns 1 through 5

   0.492463721036860   0.492305624090013   0.492143457779253   0.491977111159506   0.491806455326686

  Columns 6 through 10

   0.491631355105376   0.491451689459979   0.491267310275441   0.491078087177335   0.490883863949625

  Columns 11 through 15

   0.490684500711713   0.490479832319609   0.490269709146856   0.490053956316298   0.489832414170086

  Columns 16 through 20

   0.489604897293525   0.489371235687385   0.489131232579402   0.488884707313696   0.488631450910233

  Columns 21 through 25

   0.488371271754828   0.488103947765040   0.487829269759323   0.487547020622245   0.487256959830829

  Columns 26 through 30

   0.486958864163207   0.486652477751795   0.486337558131008   0.486013854935942   0.485681090369794

  Columns 31 through 35

   0.485339000094631   0.484987304841678   0.484625724147834   0.484253949469714   0.483871684942484

  Columns 36 through 40

   0.483478619362372   0.483074433194506   0.482658798436795   0.482231385391801   0.481791834768734

  Columns 41 through 45

   0.481339799502567   0.480874916430820   0.480396813301899   0.479905108663208   0.479399411754299

  Columns 46 through 50

   0.478879322405478   0.478344430942168   0.477794310461097   0.477228546907054   0.476646694255508

  Columns 51 through 55

   0.476048303985157   0.475432917699196   0.474800058963451   0.474149265027634   0.473480040130476

  Columns 56 through 60

   0.472791877571248   0.472084285156739                   0                   0                   0

  Column 61

                   0


inner_code_BER =

  Columns 1 through 5

   0.492463721036860   0.492305624090013   0.492143457779252   0.491977111159506   0.491806455326686

  Columns 6 through 10

   0.491631355105376   0.491451689459978   0.491267310275440   0.491078087177335   0.490883863949625

  Columns 11 through 15

   0.490684500711713   0.490479832319610   0.490269709146856   0.490053956316298   0.489832414170087

  Columns 16 through 20

   0.489604897293525   0.489371235687385   0.489131232579402   0.488884707313695   0.488631450910232

  Columns 21 through 25

   0.488371271754828   0.488103947765040   0.487829269759322   0.487547020622245   0.487256959830828

  Columns 26 through 30

   0.486958864163205   0.486652477751795   0.486337558131008   0.486013854935942   0.485681090369794

  Columns 31 through 35

   0.485339000094631   0.484987304841678   0.484625724147835   0.484253949469713   0.483871684942484

  Columns 36 through 40

   0.483478619362372   0.483074433194504   0.482658798436794   0.482231385391802   0.481791834768734

  Columns 41 through 45

   0.481339799502567   0.480874916430820   0.480396813301899   0.479905108663208   0.479399411754299

  Columns 46 through 50

   0.478879322405479   0.478344430942167   0.477794310461096   0.477228546907054   0.476646694255507

  Columns 51 through 55

   0.476048303985156   0.475432917699195   0.474800058963450   0.474149265027633   0.473480040130476

  Columns 56 through 60

   0.472791877571248   0.472084285156739   0.471356728635809                   0                   0

  Column 61

                   0


outer_code_BER =

  Columns 1 through 5

   0.492463721036860   0.492305624090013   0.492143457779253   0.491977111159506   0.491806455326686

  Columns 6 through 10

   0.491631355105376   0.491451689459979   0.491267310275441   0.491078087177335   0.490883863949625

  Columns 11 through 15

   0.490684500711713   0.490479832319609   0.490269709146856   0.490053956316298   0.489832414170086

  Columns 16 through 20

   0.489604897293525   0.489371235687385   0.489131232579402   0.488884707313696   0.488631450910233

  Columns 21 through 25

   0.488371271754828   0.488103947765040   0.487829269759323   0.487547020622245   0.487256959830829

  Columns 26 through 30

   0.486958864163207   0.486652477751795   0.486337558131008   0.486013854935942   0.485681090369794

  Columns 31 through 35

   0.485339000094631   0.484987304841678   0.484625724147834   0.484253949469714   0.483871684942484

  Columns 36 through 40

   0.483478619362372   0.483074433194506   0.482658798436795   0.482231385391801   0.481791834768734

  Columns 41 through 45

   0.481339799502567   0.480874916430820   0.480396813301899   0.479905108663208   0.479399411754299

  Columns 46 through 50

   0.478879322405478   0.478344430942168   0.477794310461097   0.477228546907054   0.476646694255508

  Columns 51 through 55

   0.476048303985157   0.475432917699196   0.474800058963451   0.474149265027634   0.473480040130476

  Columns 56 through 60

   0.472791877571248   0.472084285156739   0.471356728635810                   0                   0

  Column 61

                   0


inner_code_BER =

  Columns 1 through 5

   0.492463721036860   0.492305624090013   0.492143457779252   0.491977111159506   0.491806455326686

  Columns 6 through 10

   0.491631355105376   0.491451689459978   0.491267310275440   0.491078087177335   0.490883863949625

  Columns 11 through 15

   0.490684500711713   0.490479832319610   0.490269709146856   0.490053956316298   0.489832414170087

  Columns 16 through 20

   0.489604897293525   0.489371235687385   0.489131232579402   0.488884707313695   0.488631450910232

  Columns 21 through 25

   0.488371271754828   0.488103947765040   0.487829269759322   0.487547020622245   0.487256959830828

  Columns 26 through 30

   0.486958864163205   0.486652477751795   0.486337558131008   0.486013854935942   0.485681090369794

  Columns 31 through 35

   0.485339000094631   0.484987304841678   0.484625724147835   0.484253949469713   0.483871684942484

  Columns 36 through 40

   0.483478619362372   0.483074433194504   0.482658798436794   0.482231385391802   0.481791834768734

  Columns 41 through 45

   0.481339799502567   0.480874916430820   0.480396813301899   0.479905108663208   0.479399411754299

  Columns 46 through 50

   0.478879322405479   0.478344430942167   0.477794310461096   0.477228546907054   0.476646694255507

  Columns 51 through 55

   0.476048303985156   0.475432917699195   0.474800058963450   0.474149265027633   0.473480040130476

  Columns 56 through 60

   0.472791877571248   0.472084285156739   0.471356728635809   0.470608695876491                   0

  Column 61

                   0


outer_code_BER =

  Columns 1 through 5

   0.492463721036860   0.492305624090013   0.492143457779253   0.491977111159506   0.491806455326686

  Columns 6 through 10

   0.491631355105376   0.491451689459979   0.491267310275441   0.491078087177335   0.490883863949625

  Columns 11 through 15

   0.490684500711713   0.490479832319609   0.490269709146856   0.490053956316298   0.489832414170086

  Columns 16 through 20

   0.489604897293525   0.489371235687385   0.489131232579402   0.488884707313696   0.488631450910233

  Columns 21 through 25

   0.488371271754828   0.488103947765040   0.487829269759323   0.487547020622245   0.487256959830829

  Columns 26 through 30

   0.486958864163207   0.486652477751795   0.486337558131008   0.486013854935942   0.485681090369794

  Columns 31 through 35

   0.485339000094631   0.484987304841678   0.484625724147834   0.484253949469714   0.483871684942484

  Columns 36 through 40

   0.483478619362372   0.483074433194506   0.482658798436795   0.482231385391801   0.481791834768734

  Columns 41 through 45

   0.481339799502567   0.480874916430820   0.480396813301899   0.479905108663208   0.479399411754299

  Columns 46 through 50

   0.478879322405478   0.478344430942168   0.477794310461097   0.477228546907054   0.476646694255508

  Columns 51 through 55

   0.476048303985157   0.475432917699196   0.474800058963451   0.474149265027634   0.473480040130476

  Columns 56 through 60

   0.472791877571248   0.472084285156739   0.471356728635810   0.470608695876491                   0

  Column 61

                   0


inner_code_BER =

  Columns 1 through 5

   0.492463721036860   0.492305624090013   0.492143457779252   0.491977111159506   0.491806455326686

  Columns 6 through 10

   0.491631355105376   0.491451689459978   0.491267310275440   0.491078087177335   0.490883863949625

  Columns 11 through 15

   0.490684500711713   0.490479832319610   0.490269709146856   0.490053956316298   0.489832414170087

  Columns 16 through 20

   0.489604897293525   0.489371235687385   0.489131232579402   0.488884707313695   0.488631450910232

  Columns 21 through 25

   0.488371271754828   0.488103947765040   0.487829269759322   0.487547020622245   0.487256959830828

  Columns 26 through 30

   0.486958864163205   0.486652477751795   0.486337558131008   0.486013854935942   0.485681090369794

  Columns 31 through 35

   0.485339000094631   0.484987304841678   0.484625724147835   0.484253949469713   0.483871684942484

  Columns 36 through 40

   0.483478619362372   0.483074433194504   0.482658798436794   0.482231385391802   0.481791834768734

  Columns 41 through 45

   0.481339799502567   0.480874916430820   0.480396813301899   0.479905108663208   0.479399411754299

  Columns 46 through 50

   0.478879322405479   0.478344430942167   0.477794310461096   0.477228546907054   0.476646694255507

  Columns 51 through 55

   0.476048303985156   0.475432917699195   0.474800058963450   0.474149265027633   0.473480040130476

  Columns 56 through 60

   0.472791877571248   0.472084285156739   0.471356728635809   0.470608695876491   0.469839632804284

  Column 61

                   0


outer_code_BER =

  Columns 1 through 5

   0.492463721036860   0.492305624090013   0.492143457779253   0.491977111159506   0.491806455326686

  Columns 6 through 10

   0.491631355105376   0.491451689459979   0.491267310275441   0.491078087177335   0.490883863949625

  Columns 11 through 15

   0.490684500711713   0.490479832319609   0.490269709146856   0.490053956316298   0.489832414170086

  Columns 16 through 20

   0.489604897293525   0.489371235687385   0.489131232579402   0.488884707313696   0.488631450910233

  Columns 21 through 25

   0.488371271754828   0.488103947765040   0.487829269759323   0.487547020622245   0.487256959830829

  Columns 26 through 30

   0.486958864163207   0.486652477751795   0.486337558131008   0.486013854935942   0.485681090369794

  Columns 31 through 35

   0.485339000094631   0.484987304841678   0.484625724147834   0.484253949469714   0.483871684942484

  Columns 36 through 40

   0.483478619362372   0.483074433194506   0.482658798436795   0.482231385391801   0.481791834768734

  Columns 41 through 45

   0.481339799502567   0.480874916430820   0.480396813301899   0.479905108663208   0.479399411754299

  Columns 46 through 50

   0.478879322405478   0.478344430942168   0.477794310461097   0.477228546907054   0.476646694255508

  Columns 51 through 55

   0.476048303985157   0.475432917699196   0.474800058963451   0.474149265027634   0.473480040130476

  Columns 56 through 60

   0.472791877571248   0.472084285156739   0.471356728635810   0.470608695876491   0.469839632804284

  Column 61

                   0


inner_code_BER =

  Columns 1 through 5

   0.492463721036860   0.492305624090013   0.492143457779252   0.491977111159506   0.491806455326686

  Columns 6 through 10

   0.491631355105376   0.491451689459978   0.491267310275440   0.491078087177335   0.490883863949625

  Columns 11 through 15

   0.490684500711713   0.490479832319610   0.490269709146856   0.490053956316298   0.489832414170087

  Columns 16 through 20

   0.489604897293525   0.489371235687385   0.489131232579402   0.488884707313695   0.488631450910232

  Columns 21 through 25

   0.488371271754828   0.488103947765040   0.487829269759322   0.487547020622245   0.487256959830828

  Columns 26 through 30

   0.486958864163205   0.486652477751795   0.486337558131008   0.486013854935942   0.485681090369794

  Columns 31 through 35

   0.485339000094631   0.484987304841678   0.484625724147835   0.484253949469713   0.483871684942484

  Columns 36 through 40

   0.483478619362372   0.483074433194504   0.482658798436794   0.482231385391802   0.481791834768734

  Columns 41 through 45

   0.481339799502567   0.480874916430820   0.480396813301899   0.479905108663208   0.479399411754299

  Columns 46 through 50

   0.478879322405479   0.478344430942167   0.477794310461096   0.477228546907054   0.476646694255507

  Columns 51 through 55

   0.476048303985156   0.475432917699195   0.474800058963450   0.474149265027633   0.473480040130476

  Columns 56 through 60

   0.472791877571248   0.472084285156739   0.471356728635809   0.470608695876491   0.469839632804284

  Column 61

   0.469049008353852


outer_code_BER =

  Columns 1 through 5

   0.492463721036860   0.492305624090013   0.492143457779253   0.491977111159506   0.491806455326686

  Columns 6 through 10

   0.491631355105376   0.491451689459979   0.491267310275441   0.491078087177335   0.490883863949625

  Columns 11 through 15

   0.490684500711713   0.490479832319609   0.490269709146856   0.490053956316298   0.489832414170086

  Columns 16 through 20

   0.489604897293525   0.489371235687385   0.489131232579402   0.488884707313696   0.488631450910233

  Columns 21 through 25

   0.488371271754828   0.488103947765040   0.487829269759323   0.487547020622245   0.487256959830829

  Columns 26 through 30

   0.486958864163207   0.486652477751795   0.486337558131008   0.486013854935942   0.485681090369794

  Columns 31 through 35

   0.485339000094631   0.484987304841678   0.484625724147834   0.484253949469714   0.483871684942484

  Columns 36 through 40

   0.483478619362372   0.483074433194506   0.482658798436795   0.482231385391801   0.481791834768734

  Columns 41 through 45

   0.481339799502567   0.480874916430820   0.480396813301899   0.479905108663208   0.479399411754299

  Columns 46 through 50

   0.478879322405478   0.478344430942168   0.477794310461097   0.477228546907054   0.476646694255508

  Columns 51 through 55

   0.476048303985157   0.475432917699196   0.474800058963451   0.474149265027634   0.473480040130476

  Columns 56 through 60

   0.472791877571248   0.472084285156739   0.471356728635810   0.470608695876491   0.469839632804284

  Column 61

   0.469049008353853

Elapsed time is 52114.162898 seconds.
