# Supplementary material for: An Efficient Design of Systematic Rateless Codes
Source: Hindawi journal article supplement (doi:10.1155/2020/8068414), 2020-05-19
Supplement: f1 [file 8068414.f1.zip › supplementary files/Matlab_code_for_Figure1/BER_by_DDE/仿真结果/BER_by_DDE_rician_rate_1_2_dist2_s.txt]

µ±Ç°ÐÅµÀÎªÀµË¹ÐÅµÀ£¬²ÎÊýgamma=2

EbN0indB_vec =

  Columns 1 through 5

                   0   0.100000000000000   0.200000000000000   0.300000000000000   0.400000000000000

  Columns 6 through 10

   0.500000000000000   0.600000000000000   0.700000000000000   0.800000000000000   0.900000000000000

  Columns 11 through 15

   1.000000000000000   1.100000000000000   1.200000000000000   1.300000000000000   1.400000000000000

  Columns 16 through 20

   1.500000000000000   1.600000000000000   1.700000000000000   1.800000000000000   1.900000000000000

  Columns 21 through 25

   2.000000000000000   2.100000000000000   2.200000000000000   2.300000000000000   2.400000000000000

  Columns 26 through 30

   2.500000000000000   2.600000000000000   2.700000000000000   2.800000000000000   2.900000000000000

  Columns 31 through 35

   3.000000000000000   3.100000000000000   3.200000000000000   3.300000000000000   3.400000000000000

  Columns 36 through 40

   3.500000000000000   3.600000000000000   3.700000000000000   3.800000000000000   3.900000000000000

  Columns 41 through 45

   4.000000000000000   4.100000000000000   4.200000000000000   4.300000000000000   4.400000000000000

  Columns 46 through 50

   4.500000000000000   4.600000000000000   4.700000000000000   4.800000000000000   4.900000000000000

  Columns 51 through 55

   5.000000000000000   5.100000000000000   5.200000000000000   5.300000000000000   5.400000000000000

  Columns 56 through 60

   5.500000000000000   5.600000000000000   5.700000000000000   5.800000000000000   5.900000000000000

  Column 61

   6.000000000000000

ÖÆ±í³É¹¦
µ±Ç°Ñ¡ÔñRaptorÂë
µ±Ç°Ñ¡ÔñÏµÍ³Âë
×ÜÂëÂÊ=0.50000, ÍâÂëÂëÂÊ=0.98039, ÄÚÂëÂëÂÊ=0.51000

out_node_index =

     1     2     3     8     9    60


ans =

  Columns 1 through 5

   0.004770000000000   0.261010000000000   0.092400000000000   0.069130000000000   0.512230000000000

  Column 6

   0.060460000000000


inner_code_BER =

  Columns 1 through 5

   0.157478573366635                   0                   0                   0                   0

  Columns 6 through 10

                   0                   0                   0                   0                   0

  Columns 11 through 15

                   0                   0                   0                   0                   0

  Columns 16 through 20

                   0                   0                   0                   0                   0

  Columns 21 through 25

                   0                   0                   0                   0                   0

  Columns 26 through 30

                   0                   0                   0                   0                   0

  Columns 31 through 35

                   0                   0                   0                   0                   0

  Columns 36 through 40

                   0                   0                   0                   0                   0

  Columns 41 through 45

                   0                   0                   0                   0                   0

  Columns 46 through 50

                   0                   0                   0                   0                   0

  Columns 51 through 55

                   0                   0                   0                   0                   0

  Columns 56 through 60

                   0                   0                   0                   0                   0

  Column 61

                   0


outer_code_BER =

  Columns 1 through 5

   0.157478573366636                   0                   0                   0                   0

  Columns 6 through 10

                   0                   0                   0                   0                   0

  Columns 11 through 15

                   0                   0                   0                   0                   0

  Columns 16 through 20

                   0                   0                   0                   0                   0

  Columns 21 through 25

                   0                   0                   0                   0                   0

  Columns 26 through 30

                   0                   0                   0                   0                   0

  Columns 31 through 35

                   0                   0                   0                   0                   0

  Columns 36 through 40

                   0                   0                   0                   0                   0

  Columns 41 through 45

                   0                   0                   0                   0                   0

  Columns 46 through 50

                   0                   0                   0                   0                   0

  Columns 51 through 55

                   0                   0                   0                   0                   0

  Columns 56 through 60

                   0                   0                   0                   0                   0

  Column 61

                   0


inner_code_BER =

  Columns 1 through 5

   0.157478573366635   0.154232388246953                   0                   0                   0

  Columns 6 through 10

                   0                   0                   0                   0                   0

  Columns 11 through 15

                   0                   0                   0                   0                   0

  Columns 16 through 20

                   0                   0                   0                   0                   0

  Columns 21 through 25

                   0                   0                   0                   0                   0

  Columns 26 through 30

                   0                   0                   0                   0                   0

  Columns 31 through 35

                   0                   0                   0                   0                   0

  Columns 36 through 40

                   0                   0                   0                   0                   0

  Columns 41 through 45

                   0                   0                   0                   0                   0

  Columns 46 through 50

                   0                   0                   0                   0                   0

  Columns 51 through 55

                   0                   0                   0                   0                   0

  Columns 56 through 60

                   0                   0                   0                   0                   0

  Column 61

                   0


outer_code_BER =

  Columns 1 through 5

   0.157478573366636   0.154232388246953                   0                   0                   0

  Columns 6 through 10

                   0                   0                   0                   0                   0

  Columns 11 through 15

                   0                   0                   0                   0                   0

  Columns 16 through 20

                   0                   0                   0                   0                   0

  Columns 21 through 25

                   0                   0                   0                   0                   0

  Columns 26 through 30

                   0                   0                   0                   0                   0

  Columns 31 through 35

                   0                   0                   0                   0                   0

  Columns 36 through 40

                   0                   0                   0                   0                   0

  Columns 41 through 45

                   0                   0                   0                   0                   0

  Columns 46 through 50

                   0                   0                   0                   0                   0

  Columns 51 through 55

                   0                   0                   0                   0                   0

  Columns 56 through 60

                   0                   0                   0                   0                   0

  Column 61

                   0


inner_code_BER =

  Columns 1 through 5

   0.157478573366635   0.154232388246953   0.150943708560079                   0                   0

  Columns 6 through 10

                   0                   0                   0                   0                   0

  Columns 11 through 15

                   0                   0                   0                   0                   0

  Columns 16 through 20

                   0                   0                   0                   0                   0

  Columns 21 through 25

                   0                   0                   0                   0                   0

  Columns 26 through 30

                   0                   0                   0                   0                   0

  Columns 31 through 35

                   0                   0                   0                   0                   0

  Columns 36 through 40

                   0                   0                   0                   0                   0

  Columns 41 through 45

                   0                   0                   0                   0                   0

  Columns 46 through 50

                   0                   0                   0                   0                   0

  Columns 51 through 55

                   0                   0                   0                   0                   0

  Columns 56 through 60

                   0                   0                   0                   0                   0

  Column 61

                   0


outer_code_BER =

  Columns 1 through 5

   0.157478573366636   0.154232388246953   0.150943708560079                   0                   0

  Columns 6 through 10

                   0                   0                   0                   0                   0

  Columns 11 through 15

                   0                   0                   0                   0                   0

  Columns 16 through 20

                   0                   0                   0                   0                   0

  Columns 21 through 25

                   0                   0                   0                   0                   0

  Columns 26 through 30

                   0                   0                   0                   0                   0

  Columns 31 through 35

                   0                   0                   0                   0                   0

  Columns 36 through 40

                   0                   0                   0                   0                   0

  Columns 41 through 45

                   0                   0                   0                   0                   0

  Columns 46 through 50

                   0                   0                   0                   0                   0

  Columns 51 through 55

                   0                   0                   0                   0                   0

  Columns 56 through 60

                   0                   0                   0                   0                   0

  Column 61

                   0


inner_code_BER =

  Columns 1 through 5

   0.157478573366635   0.154232388246953   0.150943708560079   0.147607967998056                   0

  Columns 6 through 10

                   0                   0                   0                   0                   0

  Columns 11 through 15

                   0                   0                   0                   0                   0

  Columns 16 through 20

                   0                   0                   0                   0                   0

  Columns 21 through 25

                   0                   0                   0                   0                   0

  Columns 26 through 30

                   0                   0                   0                   0                   0

  Columns 31 through 35

                   0                   0                   0                   0                   0

  Columns 36 through 40

                   0                   0                   0                   0                   0

  Columns 41 through 45

                   0                   0                   0                   0                   0

  Columns 46 through 50

                   0                   0                   0                   0                   0

  Columns 51 through 55

                   0                   0                   0                   0                   0

  Columns 56 through 60

                   0                   0                   0                   0                   0

  Column 61

                   0


outer_code_BER =

  Columns 1 through 5

   0.157478573366636   0.154232388246953   0.150943708560079   0.147607967998057                   0

  Columns 6 through 10

                   0                   0                   0                   0                   0

  Columns 11 through 15

                   0                   0                   0                   0                   0

  Columns 16 through 20

                   0                   0                   0                   0                   0

  Columns 21 through 25

                   0                   0                   0                   0                   0

  Columns 26 through 30

                   0                   0                   0                   0                   0

  Columns 31 through 35

                   0                   0                   0                   0                   0

  Columns 36 through 40

                   0                   0                   0                   0                   0

  Columns 41 through 45

                   0                   0                   0                   0                   0

  Columns 46 through 50

                   0                   0                   0                   0                   0

  Columns 51 through 55

                   0                   0                   0                   0                   0

  Columns 56 through 60

                   0                   0                   0                   0                   0

  Column 61

                   0


inner_code_BER =

  Columns 1 through 5

   0.157478573366635   0.154232388246953   0.150943708560079   0.147607967998056   0.144219784017227

  Columns 6 through 10

                   0                   0                   0                   0                   0

  Columns 11 through 15

                   0                   0                   0                   0                   0

  Columns 16 through 20

                   0                   0                   0                   0                   0

  Columns 21 through 25

                   0                   0                   0                   0                   0

  Columns 26 through 30

                   0                   0                   0                   0                   0

  Columns 31 through 35

                   0                   0                   0                   0                   0

  Columns 36 through 40

                   0                   0                   0                   0                   0

  Columns 41 through 45

                   0                   0                   0                   0                   0

  Columns 46 through 50

                   0                   0                   0                   0                   0

  Columns 51 through 55

                   0                   0                   0                   0                   0

  Columns 56 through 60

                   0                   0                   0                   0                   0

  Column 61

                   0


outer_code_BER =

  Columns 1 through 5

   0.157478573366636   0.154232388246953   0.150943708560079   0.147607967998057   0.144219784017228

  Columns 6 through 10

                   0                   0                   0                   0                   0

  Columns 11 through 15

                   0                   0                   0                   0                   0

  Columns 16 through 20

                   0                   0                   0                   0                   0

  Columns 21 through 25

                   0                   0                   0                   0                   0

  Columns 26 through 30

                   0                   0                   0                   0                   0

  Columns 31 through 35

                   0                   0                   0                   0                   0

  Columns 36 through 40

                   0                   0                   0                   0                   0

  Columns 41 through 45

                   0                   0                   0                   0                   0

  Columns 46 through 50

                   0                   0                   0                   0                   0

  Columns 51 through 55

                   0                   0                   0                   0                   0

  Columns 56 through 60

                   0                   0                   0                   0                   0

  Column 61

                   0


inner_code_BER =

  Columns 1 through 5

   0.157478573366635   0.154232388246953   0.150943708560079   0.147607967998056   0.144219784017227

  Columns 6 through 10

   0.140772792911425                   0                   0                   0                   0

  Columns 11 through 15

                   0                   0                   0                   0                   0

  Columns 16 through 20

                   0                   0                   0                   0                   0

  Columns 21 through 25

                   0                   0                   0                   0                   0

  Columns 26 through 30

                   0                   0                   0                   0                   0

  Columns 31 through 35

                   0                   0                   0                   0                   0

  Columns 36 through 40

                   0                   0                   0                   0                   0

  Columns 41 through 45

                   0                   0                   0                   0                   0

  Columns 46 through 50

                   0                   0                   0                   0                   0

  Columns 51 through 55

                   0                   0                   0                   0                   0

  Columns 56 through 60

                   0                   0                   0                   0                   0

  Column 61

                   0


outer_code_BER =

  Columns 1 through 5

   0.157478573366636   0.154232388246953   0.150943708560079   0.147607967998057   0.144219784017228

  Columns 6 through 10

   0.140772792911425                   0                   0                   0                   0

  Columns 11 through 15

                   0                   0                   0                   0                   0

  Columns 16 through 20

                   0                   0                   0                   0                   0

  Columns 21 through 25

                   0                   0                   0                   0                   0

  Columns 26 through 30

                   0                   0                   0                   0                   0

  Columns 31 through 35

                   0                   0                   0                   0                   0

  Columns 36 through 40

                   0                   0                   0                   0                   0

  Columns 41 through 45

                   0                   0                   0                   0                   0

  Columns 46 through 50

                   0                   0                   0                   0                   0

  Columns 51 through 55

                   0                   0                   0                   0                   0

  Columns 56 through 60

                   0                   0                   0                   0                   0

  Column 61

                   0


inner_code_BER =

  Columns 1 through 5

   0.157478573366635   0.154232388246953   0.150943708560079   0.147607967998056   0.144219784017227

  Columns 6 through 10

   0.140772792911425   0.137259379849709                   0                   0                   0

  Columns 11 through 15

                   0                   0                   0                   0                   0

  Columns 16 through 20

                   0                   0                   0                   0                   0

  Columns 21 through 25

                   0                   0                   0                   0                   0

  Columns 26 through 30

                   0                   0                   0                   0                   0

  Columns 31 through 35

                   0                   0                   0                   0                   0

  Columns 36 through 40

                   0                   0                   0                   0                   0

  Columns 41 through 45

                   0                   0                   0                   0                   0

  Columns 46 through 50

                   0                   0                   0                   0                   0

  Columns 51 through 55

                   0                   0                   0                   0                   0

  Columns 56 through 60

                   0                   0                   0                   0                   0

  Column 61

                   0


outer_code_BER =

  Columns 1 through 5

   0.157478573366636   0.154232388246953   0.150943708560079   0.147607967998057   0.144219784017228

  Columns 6 through 10

   0.140772792911425   0.137259379849709                   0                   0                   0

  Columns 11 through 15

                   0                   0                   0                   0                   0

  Columns 16 through 20

                   0                   0                   0                   0                   0

  Columns 21 through 25

                   0                   0                   0                   0                   0

  Columns 26 through 30

                   0                   0                   0                   0                   0

  Columns 31 through 35

                   0                   0                   0                   0                   0

  Columns 36 through 40

                   0                   0                   0                   0                   0

  Columns 41 through 45

                   0                   0                   0                   0                   0

  Columns 46 through 50

                   0                   0                   0                   0                   0

  Columns 51 through 55

                   0                   0                   0                   0                   0

  Columns 56 through 60

                   0                   0                   0                   0                   0

  Column 61

                   0


inner_code_BER =

  Columns 1 through 5

   0.157478573366635   0.154232388246953   0.150943708560079   0.147607967998056   0.144219784017227

  Columns 6 through 10

   0.140772792911425   0.137259379849709   0.133670366942018                   0                   0

  Columns 11 through 15

                   0                   0                   0                   0                   0

  Columns 16 through 20

                   0                   0                   0                   0                   0

  Columns 21 through 25

                   0                   0                   0                   0                   0

  Columns 26 through 30

                   0                   0                   0                   0                   0

  Columns 31 through 35

                   0                   0                   0                   0                   0

  Columns 36 through 40

                   0                   0                   0                   0                   0

  Columns 41 through 45

                   0                   0                   0                   0                   0

  Columns 46 through 50

                   0                   0                   0                   0                   0

  Columns 51 through 55

                   0                   0                   0                   0                   0

  Columns 56 through 60

                   0                   0                   0                   0                   0

  Column 61

                   0


outer_code_BER =

  Columns 1 through 5

   0.157478573366636   0.154232388246953   0.150943708560079   0.147607967998057   0.144219784017228

  Columns 6 through 10

   0.140772792911425   0.137259379849709   0.133670366942019                   0                   0

  Columns 11 through 15

                   0                   0                   0                   0                   0

  Columns 16 through 20

                   0                   0                   0                   0                   0

  Columns 21 through 25

                   0                   0                   0                   0                   0

  Columns 26 through 30

                   0                   0                   0                   0                   0

  Columns 31 through 35

                   0                   0                   0                   0                   0

  Columns 36 through 40

                   0                   0                   0                   0                   0

  Columns 41 through 45

                   0                   0                   0                   0                   0

  Columns 46 through 50

                   0                   0                   0                   0                   0

  Columns 51 through 55

                   0                   0                   0                   0                   0

  Columns 56 through 60

                   0                   0                   0                   0                   0

  Column 61

                   0


inner_code_BER =

  Columns 1 through 5

   0.157478573366635   0.154232388246953   0.150943708560079   0.147607967998056   0.144219784017227

  Columns 6 through 10

   0.140772792911425   0.137259379849709   0.133670366942018   0.129994539995991                   0

  Columns 11 through 15

                   0                   0                   0                   0                   0

  Columns 16 through 20

                   0                   0                   0                   0                   0

  Columns 21 through 25

                   0                   0                   0                   0                   0

  Columns 26 through 30

                   0                   0                   0                   0                   0

  Columns 31 through 35

                   0                   0                   0                   0                   0

  Columns 36 through 40

                   0                   0                   0                   0                   0

  Columns 41 through 45

                   0                   0                   0                   0                   0

  Columns 46 through 50

                   0                   0                   0                   0                   0

  Columns 51 through 55

                   0                   0                   0                   0                   0

  Columns 56 through 60

                   0                   0                   0                   0                   0

  Column 61

                   0


outer_code_BER =

  Columns 1 through 5

   0.157478573366636   0.154232388246953   0.150943708560079   0.147607967998057   0.144219784017228

  Columns 6 through 10

   0.140772792911425   0.137259379849709   0.133670366942019   0.129994539995993                   0

  Columns 11 through 15

                   0                   0                   0                   0                   0

  Columns 16 through 20

                   0                   0                   0                   0                   0

  Columns 21 through 25

                   0                   0                   0                   0                   0

  Columns 26 through 30

                   0                   0                   0                   0                   0

  Columns 31 through 35

                   0                   0                   0                   0                   0

  Columns 36 through 40

                   0                   0                   0                   0                   0

  Columns 41 through 45

                   0                   0                   0                   0                   0

  Columns 46 through 50

                   0                   0                   0                   0                   0

  Columns 51 through 55

                   0                   0                   0                   0                   0

  Columns 56 through 60

                   0                   0                   0                   0                   0

  Column 61

                   0


inner_code_BER =

  Columns 1 through 5

   0.157478573366635   0.154232388246953   0.150943708560079   0.147607967998056   0.144219784017227

  Columns 6 through 10

   0.140772792911425   0.137259379849709   0.133670366942018   0.129994539995991   0.126218002680909

  Columns 11 through 15

                   0                   0                   0                   0                   0

  Columns 16 through 20

                   0                   0                   0                   0                   0

  Columns 21 through 25

                   0                   0                   0                   0                   0

  Columns 26 through 30

                   0                   0                   0                   0                   0

  Columns 31 through 35

                   0                   0                   0                   0                   0

  Columns 36 through 40

                   0                   0                   0                   0                   0

  Columns 41 through 45

                   0                   0                   0                   0                   0

  Columns 46 through 50

                   0                   0                   0                   0                   0

  Columns 51 through 55

                   0                   0                   0                   0                   0

  Columns 56 through 60

                   0                   0                   0                   0                   0

  Column 61

                   0


outer_code_BER =

  Columns 1 through 5

   0.157478573366636   0.154232388246953   0.150943708560079   0.147607967998057   0.144219784017228

  Columns 6 through 10

   0.140772792911425   0.137259379849709   0.133670366942019   0.129994539995993   0.126218002680909

  Columns 11 through 15

                   0                   0                   0                   0                   0

  Columns 16 through 20

                   0                   0                   0                   0                   0

  Columns 21 through 25

                   0                   0                   0                   0                   0

  Columns 26 through 30

                   0                   0                   0                   0                   0

  Columns 31 through 35

                   0                   0                   0                   0                   0

  Columns 36 through 40

                   0                   0                   0                   0                   0

  Columns 41 through 45

                   0                   0                   0                   0                   0

  Columns 46 through 50

                   0                   0                   0                   0                   0

  Columns 51 through 55

                   0                   0                   0                   0                   0

  Columns 56 through 60

                   0                   0                   0                   0                   0

  Column 61

                   0


inner_code_BER =

  Columns 1 through 5

   0.157478573366635   0.154232388246953   0.150943708560079   0.147607967998056   0.144219784017227

  Columns 6 through 10

   0.140772792911425   0.137259379849709   0.133670366942018   0.129994539995991   0.126218002680909

  Columns 11 through 15

   0.122323232207890                   0                   0                   0                   0

  Columns 16 through 20

                   0                   0                   0                   0                   0

  Columns 21 through 25

                   0                   0                   0                   0                   0

  Columns 26 through 30

                   0                   0                   0                   0                   0

  Columns 31 through 35

                   0                   0                   0                   0                   0

  Columns 36 through 40

                   0                   0                   0                   0                   0

  Columns 41 through 45

                   0                   0                   0                   0                   0

  Columns 46 through 50

                   0                   0                   0                   0                   0

  Columns 51 through 55

                   0                   0                   0                   0                   0

  Columns 56 through 60

                   0                   0                   0                   0                   0

  Column 61

                   0


outer_code_BER =

  Columns 1 through 5

   0.157478573366636   0.154232388246953   0.150943708560079   0.147607967998057   0.144219784017228

  Columns 6 through 10

   0.140772792911425   0.137259379849709   0.133670366942019   0.129994539995993   0.126218002680909

  Columns 11 through 15

   0.122323232207890                   0                   0                   0                   0

  Columns 16 through 20

                   0                   0                   0                   0                   0

  Columns 21 through 25

                   0                   0                   0                   0                   0

  Columns 26 through 30

                   0                   0                   0                   0                   0

  Columns 31 through 35

                   0                   0                   0                   0                   0

  Columns 36 through 40

                   0                   0                   0                   0                   0

  Columns 41 through 45

                   0                   0                   0                   0                   0

  Columns 46 through 50

                   0                   0                   0                   0                   0

  Columns 51 through 55

                   0                   0                   0                   0                   0

  Columns 56 through 60

                   0                   0                   0                   0                   0

  Column 61

                   0


inner_code_BER =

  Columns 1 through 5

   0.157478573366635   0.154232388246953   0.150943708560079   0.147607967998056   0.144219784017227

  Columns 6 through 10

   0.140772792911425   0.137259379849709   0.133670366942018   0.129994539995991   0.126218002680909

  Columns 11 through 15

   0.122323232207890   0.118287659788949                   0                   0                   0

  Columns 16 through 20

                   0                   0                   0                   0                   0

  Columns 21 through 25

                   0                   0                   0                   0                   0

  Columns 26 through 30

                   0                   0                   0                   0                   0

  Columns 31 through 35

                   0                   0                   0                   0                   0

  Columns 36 through 40

                   0                   0                   0                   0                   0

  Columns 41 through 45

                   0                   0                   0                   0                   0

  Columns 46 through 50

                   0                   0                   0                   0                   0

  Columns 51 through 55

                   0                   0                   0                   0                   0

  Columns 56 through 60

                   0                   0                   0                   0                   0

  Column 61

                   0


outer_code_BER =

  Columns 1 through 5

   0.157478573366636   0.154232388246953   0.150943708560079   0.147607967998057   0.144219784017228

  Columns 6 through 10

   0.140772792911425   0.137259379849709   0.133670366942019   0.129994539995993   0.126218002680909

  Columns 11 through 15

   0.122323232207890   0.118287659788950                   0                   0                   0

  Columns 16 through 20

                   0                   0                   0                   0                   0

  Columns 21 through 25

                   0                   0                   0                   0                   0

  Columns 26 through 30

                   0                   0                   0                   0                   0

  Columns 31 through 35

                   0                   0                   0                   0                   0

  Columns 36 through 40

                   0                   0                   0                   0                   0

  Columns 41 through 45

                   0                   0                   0                   0                   0

  Columns 46 through 50

                   0                   0                   0                   0                   0

  Columns 51 through 55

                   0                   0                   0                   0                   0

  Columns 56 through 60

                   0                   0                   0                   0                   0

  Column 61

                   0


inner_code_BER =

  Columns 1 through 5

   0.157478573366635   0.154232388246953   0.150943708560079   0.147607967998056   0.144219784017227

  Columns 6 through 10

   0.140772792911425   0.137259379849709   0.133670366942018   0.129994539995991   0.126218002680909

  Columns 11 through 15

   0.122323232207890   0.118287659788949   0.114081442314908                   0                   0

  Columns 16 through 20

                   0                   0                   0                   0                   0

  Columns 21 through 25

                   0                   0                   0                   0                   0

  Columns 26 through 30

                   0                   0                   0                   0                   0

  Columns 31 through 35

                   0                   0                   0                   0                   0

  Columns 36 through 40

                   0                   0                   0                   0                   0

  Columns 41 through 45

                   0                   0                   0                   0                   0

  Columns 46 through 50

                   0                   0                   0                   0                   0

  Columns 51 through 55

                   0                   0                   0                   0                   0

  Columns 56 through 60

                   0                   0                   0                   0                   0

  Column 61

                   0


outer_code_BER =

  Columns 1 through 5

   0.157478573366636   0.154232388246953   0.150943708560079   0.147607967998057   0.144219784017228

  Columns 6 through 10

   0.140772792911425   0.137259379849709   0.133670366942019   0.129994539995993   0.126218002680909

  Columns 11 through 15

   0.122323232207890   0.118287659788950   0.114081442314907                   0                   0

  Columns 16 through 20

                   0                   0                   0                   0                   0

  Columns 21 through 25

                   0                   0                   0                   0                   0

  Columns 26 through 30

                   0                   0                   0                   0                   0

  Columns 31 through 35

                   0                   0                   0                   0                   0

  Columns 36 through 40

                   0                   0                   0                   0                   0

  Columns 41 through 45

                   0                   0                   0                   0                   0

  Columns 46 through 50

                   0                   0                   0                   0                   0

  Columns 51 through 55

                   0                   0                   0                   0                   0

  Columns 56 through 60

                   0                   0                   0                   0                   0

  Column 61

                   0


inner_code_BER =

  Columns 1 through 5

   0.157478573366635   0.154232388246953   0.150943708560079   0.147607967998056   0.144219784017227

  Columns 6 through 10

   0.140772792911425   0.137259379849709   0.133670366942018   0.129994539995991   0.126218002680909

  Columns 11 through 15

   0.122323232207890   0.118287659788949   0.114081442314908   0.109663818579070                   0

  Columns 16 through 20

                   0                   0                   0                   0                   0

  Columns 21 through 25

                   0                   0                   0                   0                   0

  Columns 26 through 30

                   0                   0                   0                   0                   0

  Columns 31 through 35

                   0                   0                   0                   0                   0

  Columns 36 through 40

                   0                   0                   0                   0                   0

  Columns 41 through 45

                   0                   0                   0                   0                   0

  Columns 46 through 50

                   0                   0                   0                   0                   0

  Columns 51 through 55

                   0                   0                   0                   0                   0

  Columns 56 through 60

                   0                   0                   0                   0                   0

  Column 61

                   0


outer_code_BER =

  Columns 1 through 5

   0.157478573366636   0.154232388246953   0.150943708560079   0.147607967998057   0.144219784017228

  Columns 6 through 10

   0.140772792911425   0.137259379849709   0.133670366942019   0.129994539995993   0.126218002680909

  Columns 11 through 15

   0.122323232207890   0.118287659788950   0.114081442314907   0.109663818579070                   0

  Columns 16 through 20

                   0                   0                   0                   0                   0

  Columns 21 through 25

                   0                   0                   0                   0                   0

  Columns 26 through 30

                   0                   0                   0                   0                   0

  Columns 31 through 35

                   0                   0                   0                   0                   0

  Columns 36 through 40

                   0                   0                   0                   0                   0

  Columns 41 through 45

                   0                   0                   0                   0                   0

  Columns 46 through 50

                   0                   0                   0                   0                   0

  Columns 51 through 55

                   0                   0                   0                   0                   0

  Columns 56 through 60

                   0                   0                   0                   0                   0

  Column 61

                   0


inner_code_BER =

  Columns 1 through 5

   0.157478573366635   0.154232388246953   0.150943708560079   0.147607967998056   0.144219784017227

  Columns 6 through 10

   0.140772792911425   0.137259379849709   0.133670366942018   0.129994539995991   0.126218002680909

  Columns 11 through 15

   0.122323232207890   0.118287659788949   0.114081442314908   0.109663818579070   0.104976680430415

  Columns 16 through 20

                   0                   0                   0                   0                   0

  Columns 21 through 25

                   0                   0                   0                   0                   0

  Columns 26 through 30

                   0                   0                   0                   0                   0

  Columns 31 through 35

                   0                   0                   0                   0                   0

  Columns 36 through 40

                   0                   0                   0                   0                   0

  Columns 41 through 45

                   0                   0                   0                   0                   0

  Columns 46 through 50

                   0                   0                   0                   0                   0

  Columns 51 through 55

                   0                   0                   0                   0                   0

  Columns 56 through 60

                   0                   0                   0                   0                   0

  Column 61

                   0


outer_code_BER =

  Columns 1 through 5

   0.157478573366636   0.154232388246953   0.150943708560079   0.147607967998057   0.144219784017228

  Columns 6 through 10

   0.140772792911425   0.137259379849709   0.133670366942019   0.129994539995993   0.126218002680909

  Columns 11 through 15

   0.122323232207890   0.118287659788950   0.114081442314907   0.109663818579070   0.104976680430415

  Columns 16 through 20

                   0                   0                   0                   0                   0

  Columns 21 through 25

                   0                   0                   0                   0                   0

  Columns 26 through 30

                   0                   0                   0                   0                   0

  Columns 31 through 35

                   0                   0                   0                   0                   0

  Columns 36 through 40

                   0                   0                   0                   0                   0

  Columns 41 through 45

                   0                   0                   0                   0                   0

  Columns 46 through 50

                   0                   0                   0                   0                   0

  Columns 51 through 55

                   0                   0                   0                   0                   0

  Columns 56 through 60

                   0                   0                   0                   0                   0

  Column 61

                   0


inner_code_BER =

  Columns 1 through 5

   0.157478573366635   0.154232388246953   0.150943708560079   0.147607967998056   0.144219784017227

  Columns 6 through 10

   0.140772792911425   0.137259379849709   0.133670366942018   0.129994539995991   0.126218002680909

  Columns 11 through 15

   0.122323232207890   0.118287659788949   0.114081442314908   0.109663818579070   0.104976680430415

  Columns 16 through 20

   0.099932398474753                   0                   0                   0                   0

  Columns 21 through 25

                   0                   0                   0                   0                   0

  Columns 26 through 30

                   0                   0                   0                   0                   0

  Columns 31 through 35

                   0                   0                   0                   0                   0

  Columns 36 through 40

                   0                   0                   0                   0                   0

  Columns 41 through 45

                   0                   0                   0                   0                   0

  Columns 46 through 50

                   0                   0                   0                   0                   0

  Columns 51 through 55

                   0                   0                   0                   0                   0

  Columns 56 through 60

                   0                   0                   0                   0                   0

  Column 61

                   0


outer_code_BER =

  Columns 1 through 5

   0.157478573366636   0.154232388246953   0.150943708560079   0.147607967998057   0.144219784017228

  Columns 6 through 10

   0.140772792911425   0.137259379849709   0.133670366942019   0.129994539995993   0.126218002680909

  Columns 11 through 15

   0.122323232207890   0.118287659788950   0.114081442314907   0.109663818579070   0.104976680430415

  Columns 16 through 20

   0.099932398474753                   0                   0                   0                   0

  Columns 21 through 25

                   0                   0                   0                   0                   0

  Columns 26 through 30

                   0                   0                   0                   0                   0

  Columns 31 through 35

                   0                   0                   0                   0                   0

  Columns 36 through 40

                   0                   0                   0                   0                   0

  Columns 41 through 45

                   0                   0                   0                   0                   0

  Columns 46 through 50

                   0                   0                   0                   0                   0

  Columns 51 through 55

                   0                   0                   0                   0                   0

  Columns 56 through 60

                   0                   0                   0                   0                   0

  Column 61

                   0


inner_code_BER =

  Columns 1 through 5

   0.157478573366635   0.154232388246953   0.150943708560079   0.147607967998056   0.144219784017227

  Columns 6 through 10

   0.140772792911425   0.137259379849709   0.133670366942018   0.129994539995991   0.126218002680909

  Columns 11 through 15

   0.122323232207890   0.118287659788949   0.114081442314908   0.109663818579070   0.104976680430415

  Columns 16 through 20

   0.099932398474753   0.094387848566439                   0                   0                   0

  Columns 21 through 25

                   0                   0                   0                   0                   0

  Columns 26 through 30

                   0                   0                   0                   0                   0

  Columns 31 through 35

                   0                   0                   0                   0                   0

  Columns 36 through 40

                   0                   0                   0                   0                   0

  Columns 41 through 45

                   0                   0                   0                   0                   0

  Columns 46 through 50

                   0                   0                   0                   0                   0

  Columns 51 through 55

                   0                   0                   0                   0                   0

  Columns 56 through 60

                   0                   0                   0                   0                   0

  Column 61

                   0


outer_code_BER =

  Columns 1 through 5

   0.157478573366636   0.154232388246953   0.150943708560079   0.147607967998057   0.144219784017228

  Columns 6 through 10

   0.140772792911425   0.137259379849709   0.133670366942019   0.129994539995993   0.126218002680909

  Columns 11 through 15

   0.122323232207890   0.118287659788950   0.114081442314907   0.109663818579070   0.104976680430415

  Columns 16 through 20

   0.099932398474753   0.094387848566439                   0                   0                   0

  Columns 21 through 25

                   0                   0                   0                   0                   0

  Columns 26 through 30

                   0                   0                   0                   0                   0

  Columns 31 through 35

                   0                   0                   0                   0                   0

  Columns 36 through 40

                   0                   0                   0                   0                   0

  Columns 41 through 45

                   0                   0                   0                   0                   0

  Columns 46 through 50

                   0                   0                   0                   0                   0

  Columns 51 through 55

                   0                   0                   0                   0                   0

  Columns 56 through 60

                   0                   0                   0                   0                   0

  Column 61

                   0


inner_code_BER =

  Columns 1 through 5

   0.157478573366635   0.154232388246953   0.150943708560079   0.147607967998056   0.144219784017227

  Columns 6 through 10

   0.140772792911425   0.137259379849709   0.133670366942018   0.129994539995991   0.126218002680909

  Columns 11 through 15

   0.122323232207890   0.118287659788949   0.114081442314908   0.109663818579070   0.104976680430415

  Columns 16 through 20

   0.099932398474753   0.094387848566439   0.088079331165393                   0                   0

  Columns 21 through 25

                   0                   0                   0                   0                   0

  Columns 26 through 30

                   0                   0                   0                   0                   0

  Columns 31 through 35

                   0                   0                   0                   0                   0

  Columns 36 through 40

                   0                   0                   0                   0                   0

  Columns 41 through 45

                   0                   0                   0                   0                   0

  Columns 46 through 50

                   0                   0                   0                   0                   0

  Columns 51 through 55

                   0                   0                   0                   0                   0

  Columns 56 through 60

                   0                   0                   0                   0                   0

  Column 61

                   0


outer_code_BER =

  Columns 1 through 5

   0.157478573366636   0.154232388246953   0.150943708560079   0.147607967998057   0.144219784017228

  Columns 6 through 10

   0.140772792911425   0.137259379849709   0.133670366942019   0.129994539995993   0.126218002680909

  Columns 11 through 15

   0.122323232207890   0.118287659788950   0.114081442314907   0.109663818579070   0.104976680430415

  Columns 16 through 20

   0.099932398474753   0.094387848566439   0.088079331165393                   0                   0

  Columns 21 through 25

                   0                   0                   0                   0                   0

  Columns 26 through 30

                   0                   0                   0                   0                   0

  Columns 31 through 35

                   0                   0                   0                   0                   0

  Columns 36 through 40

                   0                   0                   0                   0                   0

  Columns 41 through 45

                   0                   0                   0                   0                   0

  Columns 46 through 50

                   0                   0                   0                   0                   0

  Columns 51 through 55

                   0                   0                   0                   0                   0

  Columns 56 through 60

                   0                   0                   0                   0                   0

  Column 61

                   0


inner_code_BER =

  Columns 1 through 5

   0.157478573366635   0.154232388246953   0.150943708560079   0.147607967998056   0.144219784017227

  Columns 6 through 10

   0.140772792911425   0.137259379849709   0.133670366942018   0.129994539995991   0.126218002680909

  Columns 11 through 15

   0.122323232207890   0.118287659788949   0.114081442314908   0.109663818579070   0.104976680430415

  Columns 16 through 20

   0.099932398474753   0.094387848566439   0.088079331165393   0.080407748267556                   0

  Columns 21 through 25

                   0                   0                   0                   0                   0

  Columns 26 through 30

                   0                   0                   0                   0                   0

  Columns 31 through 35

                   0                   0                   0                   0                   0

  Columns 36 through 40

                   0                   0                   0                   0                   0

  Columns 41 through 45

                   0                   0                   0                   0                   0

  Columns 46 through 50

                   0                   0                   0                   0                   0

  Columns 51 through 55

                   0                   0                   0                   0                   0

  Columns 56 through 60

                   0                   0                   0                   0                   0

  Column 61

                   0


outer_code_BER =

  Columns 1 through 5

   0.157478573366636   0.154232388246953   0.150943708560079   0.147607967998057   0.144219784017228

  Columns 6 through 10

   0.140772792911425   0.137259379849709   0.133670366942019   0.129994539995993   0.126218002680909

  Columns 11 through 15

   0.122323232207890   0.118287659788950   0.114081442314907   0.109663818579070   0.104976680430415

  Columns 16 through 20

   0.099932398474753   0.094387848566439   0.088079331165393   0.080407748267558                   0

  Columns 21 through 25

                   0                   0                   0                   0                   0

  Columns 26 through 30

                   0                   0                   0                   0                   0

  Columns 31 through 35

                   0                   0                   0                   0                   0

  Columns 36 through 40

                   0                   0                   0                   0                   0

  Columns 41 through 45

                   0                   0                   0                   0                   0

  Columns 46 through 50

                   0                   0                   0                   0                   0

  Columns 51 through 55

                   0                   0                   0                   0                   0

  Columns 56 through 60

                   0                   0                   0                   0                   0

  Column 61

                   0


inner_code_BER =

  Columns 1 through 5

   0.157478573366635   0.154232388246953   0.150943708560079   0.147607967998056   0.144219784017227

  Columns 6 through 10

   0.140772792911425   0.137259379849709   0.133670366942018   0.129994539995991   0.126218002680909

  Columns 11 through 15

   0.122323232207890   0.118287659788949   0.114081442314908   0.109663818579070   0.104976680430415

  Columns 16 through 20

   0.099932398474753   0.094387848566439   0.088079331165393   0.080407748267556   0.069119154541467

  Columns 21 through 25

                   0                   0                   0                   0                   0

  Columns 26 through 30

                   0                   0                   0                   0                   0

  Columns 31 through 35

                   0                   0                   0                   0                   0

  Columns 36 through 40

                   0                   0                   0                   0                   0

  Columns 41 through 45

                   0                   0                   0                   0                   0

  Columns 46 through 50

                   0                   0                   0                   0                   0

  Columns 51 through 55

                   0                   0                   0                   0                   0

  Columns 56 through 60

                   0                   0                   0                   0                   0

  Column 61

                   0


outer_code_BER =

  Columns 1 through 5

   0.157478573366636   0.154232388246953   0.150943708560079   0.147607967998057   0.144219784017228

  Columns 6 through 10

   0.140772792911425   0.137259379849709   0.133670366942019   0.129994539995993   0.126218002680909

  Columns 11 through 15

   0.122323232207890   0.118287659788950   0.114081442314907   0.109663818579070   0.104976680430415

  Columns 16 through 20

   0.099932398474753   0.094387848566439   0.088079331165393   0.080407748267558   0.069119154541600

  Columns 21 through 25

                   0                   0                   0                   0                   0

  Columns 26 through 30

                   0                   0                   0                   0                   0

  Columns 31 through 35

                   0                   0                   0                   0                   0

  Columns 36 through 40

                   0                   0                   0                   0                   0

  Columns 41 through 45

                   0                   0                   0                   0                   0

  Columns 46 through 50

                   0                   0                   0                   0                   0

  Columns 51 through 55

                   0                   0                   0                   0                   0

  Columns 56 through 60

                   0                   0                   0                   0                   0

  Column 61

                   0


inner_code_BER =

  Columns 1 through 5

   0.157478573366635   0.154232388246953   0.150943708560079   0.147607967998056   0.144219784017227

  Columns 6 through 10

   0.140772792911425   0.137259379849709   0.133670366942018   0.129994539995991   0.126218002680909

  Columns 11 through 15

   0.122323232207890   0.118287659788949   0.114081442314908   0.109663818579070   0.104976680430415

  Columns 16 through 20

   0.099932398474753   0.094387848566439   0.088079331165393   0.080407748267556   0.069119154541467

  Columns 21 through 25

   0.002555395239422                   0                   0                   0                   0

  Columns 26 through 30

                   0                   0                   0                   0                   0

  Columns 31 through 35

                   0                   0                   0                   0                   0

  Columns 36 through 40

                   0                   0                   0                   0                   0

  Columns 41 through 45

                   0                   0                   0                   0                   0

  Columns 46 through 50

                   0                   0                   0                   0                   0

  Columns 51 through 55

                   0                   0                   0                   0                   0

  Columns 56 through 60

                   0                   0                   0                   0                   0

  Column 61

                   0


outer_code_BER =

  Columns 1 through 5

   0.157478573366636   0.154232388246953   0.150943708560079   0.147607967998057   0.144219784017228

  Columns 6 through 10

   0.140772792911425   0.137259379849709   0.133670366942019   0.129994539995993   0.126218002680909

  Columns 11 through 15

   0.122323232207890   0.118287659788950   0.114081442314907   0.109663818579070   0.104976680430415

  Columns 16 through 20

   0.099932398474753   0.094387848566439   0.088079331165393   0.080407748267558   0.069119154541600

  Columns 21 through 25

   0.000000001335295                   0                   0                   0                   0

  Columns 26 through 30

                   0                   0                   0                   0                   0

  Columns 31 through 35

                   0                   0                   0                   0                   0

  Columns 36 through 40

                   0                   0                   0                   0                   0

  Columns 41 through 45

                   0                   0                   0                   0                   0

  Columns 46 through 50

                   0                   0                   0                   0                   0

  Columns 51 through 55

                   0                   0                   0                   0                   0

  Columns 56 through 60

                   0                   0                   0                   0                   0

  Column 61

                   0

µ±Ç°ÍâÂëÎóÂëÂÊÒÑµÍÓÚÄ¿±êÎóÂëÂÊ£¬ÐÅÔë±ÈÎª2.00 dB

inner_code_BER =

  Columns 1 through 5

   0.157478573366635   0.154232388246953   0.150943708560079   0.147607967998056   0.144219784017227

  Columns 6 through 10

   0.140772792911425   0.137259379849709   0.133670366942018   0.129994539995991   0.126218002680909

  Columns 11 through 15

   0.122323232207890   0.118287659788949   0.114081442314908   0.109663818579070   0.104976680430415

  Columns 16 through 20

   0.099932398474753   0.094387848566439   0.088079331165393   0.080407748267556   0.069119154541467

  Columns 21 through 25

   0.002555395239422   0.002072250485564                   0                   0                   0

  Columns 26 through 30

                   0                   0                   0                   0                   0

  Columns 31 through 35

                   0                   0                   0                   0                   0

  Columns 36 through 40

                   0                   0                   0                   0                   0

  Columns 41 through 45

                   0                   0                   0                   0                   0

  Columns 46 through 50

                   0                   0                   0                   0                   0

  Columns 51 through 55

                   0                   0                   0                   0                   0

  Columns 56 through 60

                   0                   0                   0                   0                   0

  Column 61

                   0


inner_code_BER =

  Columns 1 through 5

   0.157478573366635   0.154232388246953   0.150943708560079   0.147607967998056   0.144219784017227

  Columns 6 through 10

   0.140772792911425   0.137259379849709   0.133670366942018   0.129994539995991   0.126218002680909

  Columns 11 through 15

   0.122323232207890   0.118287659788949   0.114081442314908   0.109663818579070   0.104976680430415

  Columns 16 through 20

   0.099932398474753   0.094387848566439   0.088079331165393   0.080407748267556   0.069119154541467

  Columns 21 through 25

   0.002555395239422   0.002072250485564   0.001738539577491                   0                   0

  Columns 26 through 30

                   0                   0                   0                   0                   0

  Columns 31 through 35

                   0                   0                   0                   0                   0

  Columns 36 through 40

                   0                   0                   0                   0                   0

  Columns 41 through 45

                   0                   0                   0                   0                   0

  Columns 46 through 50

                   0                   0                   0                   0                   0

  Columns 51 through 55

                   0                   0                   0                   0                   0

  Columns 56 through 60

                   0                   0                   0                   0                   0

  Column 61

                   0


inner_code_BER =

  Columns 1 through 5

   0.157478573366635   0.154232388246953   0.150943708560079   0.147607967998056   0.144219784017227

  Columns 6 through 10

   0.140772792911425   0.137259379849709   0.133670366942018   0.129994539995991   0.126218002680909

  Columns 11 through 15

   0.122323232207890   0.118287659788949   0.114081442314908   0.109663818579070   0.104976680430415

  Columns 16 through 20

   0.099932398474753   0.094387848566439   0.088079331165393   0.080407748267556   0.069119154541467

  Columns 21 through 25

   0.002555395239422   0.002072250485564   0.001738539577491   0.001488368750321                   0

  Columns 26 through 30

                   0                   0                   0                   0                   0

  Columns 31 through 35

                   0                   0                   0                   0                   0

  Columns 36 through 40

                   0                   0                   0                   0                   0

  Columns 41 through 45

                   0                   0                   0                   0                   0

  Columns 46 through 50

                   0                   0                   0                   0                   0

  Columns 51 through 55

                   0                   0                   0                   0                   0

  Columns 56 through 60

                   0                   0                   0                   0                   0

  Column 61

                   0


inner_code_BER =

  Columns 1 through 5

   0.157478573366635   0.154232388246953   0.150943708560079   0.147607967998056   0.144219784017227

  Columns 6 through 10

   0.140772792911425   0.137259379849709   0.133670366942018   0.129994539995991   0.126218002680909

  Columns 11 through 15

   0.122323232207890   0.118287659788949   0.114081442314908   0.109663818579070   0.104976680430415

  Columns 16 through 20

   0.099932398474753   0.094387848566439   0.088079331165393   0.080407748267556   0.069119154541467

  Columns 21 through 25

   0.002555395239422   0.002072250485564   0.001738539577491   0.001488368750321   0.001291677317379

  Columns 26 through 30

                   0                   0                   0                   0                   0

  Columns 31 through 35

                   0                   0                   0                   0                   0

  Columns 36 through 40

                   0                   0                   0                   0                   0

  Columns 41 through 45

                   0                   0                   0                   0                   0

  Columns 46 through 50

                   0                   0                   0                   0                   0

  Columns 51 through 55

                   0                   0                   0                   0                   0

  Columns 56 through 60

                   0                   0                   0                   0                   0

  Column 61

                   0


inner_code_BER =

  Columns 1 through 5

   0.157478573366635   0.154232388246953   0.150943708560079   0.147607967998056   0.144219784017227

  Columns 6 through 10

   0.140772792911425   0.137259379849709   0.133670366942018   0.129994539995991   0.126218002680909

  Columns 11 through 15

   0.122323232207890   0.118287659788949   0.114081442314908   0.109663818579070   0.104976680430415

  Columns 16 through 20

   0.099932398474753   0.094387848566439   0.088079331165393   0.080407748267556   0.069119154541467

  Columns 21 through 25

   0.002555395239422   0.002072250485564   0.001738539577491   0.001488368750321   0.001291677317379

  Columns 26 through 30

   0.001132122400528                   0                   0                   0                   0

  Columns 31 through 35

                   0                   0                   0                   0                   0

  Columns 36 through 40

                   0                   0                   0                   0                   0

  Columns 41 through 45

                   0                   0                   0                   0                   0

  Columns 46 through 50

                   0                   0                   0                   0                   0

  Columns 51 through 55

                   0                   0                   0                   0                   0

  Columns 56 through 60

                   0                   0                   0                   0                   0

  Column 61

                   0


inner_code_BER =

  Columns 1 through 5

   0.157478573366635   0.154232388246953   0.150943708560079   0.147607967998056   0.144219784017227

  Columns 6 through 10

   0.140772792911425   0.137259379849709   0.133670366942018   0.129994539995991   0.126218002680909

  Columns 11 through 15

   0.122323232207890   0.118287659788949   0.114081442314908   0.109663818579070   0.104976680430415

  Columns 16 through 20

   0.099932398474753   0.094387848566439   0.088079331165393   0.080407748267556   0.069119154541467

  Columns 21 through 25

   0.002555395239422   0.002072250485564   0.001738539577491   0.001488368750321   0.001291677317379

  Columns 26 through 30

   0.001132122400528   0.000999783359723                   0                   0                   0

  Columns 31 through 35

                   0                   0                   0                   0                   0

  Columns 36 through 40

                   0                   0                   0                   0                   0

  Columns 41 through 45

                   0                   0                   0                   0                   0

  Columns 46 through 50

                   0                   0                   0                   0                   0

  Columns 51 through 55

                   0                   0                   0                   0                   0

  Columns 56 through 60

                   0                   0                   0                   0                   0

  Column 61

                   0


inner_code_BER =

  Columns 1 through 5

   0.157478573366635   0.154232388246953   0.150943708560079   0.147607967998056   0.144219784017227

  Columns 6 through 10

   0.140772792911425   0.137259379849709   0.133670366942018   0.129994539995991   0.126218002680909

  Columns 11 through 15

   0.122323232207890   0.118287659788949   0.114081442314908   0.109663818579070   0.104976680430415

  Columns 16 through 20

   0.099932398474753   0.094387848566439   0.088079331165393   0.080407748267556   0.069119154541467

  Columns 21 through 25

   0.002555395239422   0.002072250485564   0.001738539577491   0.001488368750321   0.001291677317379

  Columns 26 through 30

   0.001132122400528   0.000999783359723   0.000888192850092                   0                   0

  Columns 31 through 35

                   0                   0                   0                   0                   0

  Columns 36 through 40

                   0                   0                   0                   0                   0

  Columns 41 through 45

                   0                   0                   0                   0                   0

  Columns 46 through 50

                   0                   0                   0                   0                   0

  Columns 51 through 55

                   0                   0                   0                   0                   0

  Columns 56 through 60

                   0                   0                   0                   0                   0

  Column 61

                   0


inner_code_BER =

  Columns 1 through 5

   0.157478573366635   0.154232388246953   0.150943708560079   0.147607967998056   0.144219784017227

  Columns 6 through 10

   0.140772792911425   0.137259379849709   0.133670366942018   0.129994539995991   0.126218002680909

  Columns 11 through 15

   0.122323232207890   0.118287659788949   0.114081442314908   0.109663818579070   0.104976680430415

  Columns 16 through 20

   0.099932398474753   0.094387848566439   0.088079331165393   0.080407748267556   0.069119154541467

  Columns 21 through 25

   0.002555395239422   0.002072250485564   0.001738539577491   0.001488368750321   0.001291677317379

  Columns 26 through 30

   0.001132122400528   0.000999783359723   0.000888192850092   0.000792886474344                   0

  Columns 31 through 35

                   0                   0                   0                   0                   0

  Columns 36 through 40

                   0                   0                   0                   0                   0

  Columns 41 through 45

                   0                   0                   0                   0                   0

  Columns 46 through 50

                   0                   0                   0                   0                   0

  Columns 51 through 55

                   0                   0                   0                   0                   0

  Columns 56 through 60

                   0                   0                   0                   0                   0

  Column 61

                   0


inner_code_BER =

  Columns 1 through 5

   0.157478573366635   0.154232388246953   0.150943708560079   0.147607967998056   0.144219784017227

  Columns 6 through 10

   0.140772792911425   0.137259379849709   0.133670366942018   0.129994539995991   0.126218002680909

  Columns 11 through 15

   0.122323232207890   0.118287659788949   0.114081442314908   0.109663818579070   0.104976680430415

  Columns 16 through 20

   0.099932398474753   0.094387848566439   0.088079331165393   0.080407748267556   0.069119154541467

  Columns 21 through 25

   0.002555395239422   0.002072250485564   0.001738539577491   0.001488368750321   0.001291677317379

  Columns 26 through 30

   0.001132122400528   0.000999783359723   0.000888192850092   0.000792886474344   0.000710647077310

  Columns 31 through 35

                   0                   0                   0                   0                   0

  Columns 36 through 40

                   0                   0                   0                   0                   0

  Columns 41 through 45

                   0                   0                   0                   0                   0

  Columns 46 through 50

                   0                   0                   0                   0                   0

  Columns 51 through 55

                   0                   0                   0                   0                   0

  Columns 56 through 60

                   0                   0                   0                   0                   0

  Column 61

                   0


inner_code_BER =

  Columns 1 through 5

   0.157478573366635   0.154232388246953   0.150943708560079   0.147607967998056   0.144219784017227

  Columns 6 through 10

   0.140772792911425   0.137259379849709   0.133670366942018   0.129994539995991   0.126218002680909

  Columns 11 through 15

   0.122323232207890   0.118287659788949   0.114081442314908   0.109663818579070   0.104976680430415

  Columns 16 through 20

   0.099932398474753   0.094387848566439   0.088079331165393   0.080407748267556   0.069119154541467

  Columns 21 through 25

   0.002555395239422   0.002072250485564   0.001738539577491   0.001488368750321   0.001291677317379

  Columns 26 through 30

   0.001132122400528   0.000999783359723   0.000888192850092   0.000792886474344   0.000710647077310

  Columns 31 through 35

   0.000639101596885                   0                   0                   0                   0

  Columns 36 through 40

                   0                   0                   0                   0                   0

  Columns 41 through 45

                   0                   0                   0                   0                   0

  Columns 46 through 50

                   0                   0                   0                   0                   0

  Columns 51 through 55

                   0                   0                   0                   0                   0

  Columns 56 through 60

                   0                   0                   0                   0                   0

  Column 61

                   0


inner_code_BER =

  Columns 1 through 5

   0.157478573366635   0.154232388246953   0.150943708560079   0.147607967998056   0.144219784017227

  Columns 6 through 10

   0.140772792911425   0.137259379849709   0.133670366942018   0.129994539995991   0.126218002680909

  Columns 11 through 15

   0.122323232207890   0.118287659788949   0.114081442314908   0.109663818579070   0.104976680430415

  Columns 16 through 20

   0.099932398474753   0.094387848566439   0.088079331165393   0.080407748267556   0.069119154541467

  Columns 21 through 25

   0.002555395239422   0.002072250485564   0.001738539577491   0.001488368750321   0.001291677317379

  Columns 26 through 30

   0.001132122400528   0.000999783359723   0.000888192850092   0.000792886474344   0.000710647077310

  Columns 31 through 35

   0.000639101596885   0.000576425807392                   0                   0                   0

  Columns 36 through 40

                   0                   0                   0                   0                   0

  Columns 41 through 45

                   0                   0                   0                   0                   0

  Columns 46 through 50

                   0                   0                   0                   0                   0

  Columns 51 through 55

                   0                   0                   0                   0                   0

  Columns 56 through 60

                   0                   0                   0                   0                   0

  Column 61

                   0


inner_code_BER =

  Columns 1 through 5

   0.157478573366635   0.154232388246953   0.150943708560079   0.147607967998056   0.144219784017227

  Columns 6 through 10

   0.140772792911425   0.137259379849709   0.133670366942018   0.129994539995991   0.126218002680909

  Columns 11 through 15

   0.122323232207890   0.118287659788949   0.114081442314908   0.109663818579070   0.104976680430415

  Columns 16 through 20

   0.099932398474753   0.094387848566439   0.088079331165393   0.080407748267556   0.069119154541467

  Columns 21 through 25

   0.002555395239422   0.002072250485564   0.001738539577491   0.001488368750321   0.001291677317379

  Columns 26 through 30

   0.001132122400528   0.000999783359723   0.000888192850092   0.000792886474344   0.000710647077310

  Columns 31 through 35

   0.000639101596885   0.000576425807392   0.000521206929567                   0                   0

  Columns 36 through 40

                   0                   0                   0                   0                   0

  Columns 41 through 45

                   0                   0                   0                   0                   0

  Columns 46 through 50

                   0                   0                   0                   0                   0

  Columns 51 through 55

                   0                   0                   0                   0                   0

  Columns 56 through 60

                   0                   0                   0                   0                   0

  Column 61

                   0


inner_code_BER =

  Columns 1 through 5

   0.157478573366635   0.154232388246953   0.150943708560079   0.147607967998056   0.144219784017227

  Columns 6 through 10

   0.140772792911425   0.137259379849709   0.133670366942018   0.129994539995991   0.126218002680909

  Columns 11 through 15

   0.122323232207890   0.118287659788949   0.114081442314908   0.109663818579070   0.104976680430415

  Columns 16 through 20

   0.099932398474753   0.094387848566439   0.088079331165393   0.080407748267556   0.069119154541467

  Columns 21 through 25

   0.002555395239422   0.002072250485564   0.001738539577491   0.001488368750321   0.001291677317379

  Columns 26 through 30

   0.001132122400528   0.000999783359723   0.000888192850092   0.000792886474344   0.000710647077310

  Columns 31 through 35

   0.000639101596885   0.000576425807392   0.000521206929567   0.000472313436693                   0

  Columns 36 through 40

                   0                   0                   0                   0                   0

  Columns 41 through 45

                   0                   0                   0                   0                   0

  Columns 46 through 50

                   0                   0                   0                   0                   0

  Columns 51 through 55

                   0                   0                   0                   0                   0

  Columns 56 through 60

                   0                   0                   0                   0                   0

  Column 61

                   0


inner_code_BER =

  Columns 1 through 5

   0.157478573366635   0.154232388246953   0.150943708560079   0.147607967998056   0.144219784017227

  Columns 6 through 10

   0.140772792911425   0.137259379849709   0.133670366942018   0.129994539995991   0.126218002680909

  Columns 11 through 15

   0.122323232207890   0.118287659788949   0.114081442314908   0.109663818579070   0.104976680430415

  Columns 16 through 20

   0.099932398474753   0.094387848566439   0.088079331165393   0.080407748267556   0.069119154541467

  Columns 21 through 25

   0.002555395239422   0.002072250485564   0.001738539577491   0.001488368750321   0.001291677317379

  Columns 26 through 30

   0.001132122400528   0.000999783359723   0.000888192850092   0.000792886474344   0.000710647077310

  Columns 31 through 35

   0.000639101596885   0.000576425807392   0.000521206929567   0.000472313436693   0.000428839953459

  Columns 36 through 40

                   0                   0                   0                   0                   0

  Columns 41 through 45

                   0                   0                   0                   0                   0

  Columns 46 through 50

                   0                   0                   0                   0                   0

  Columns 51 through 55

                   0                   0                   0                   0                   0

  Columns 56 through 60

                   0                   0                   0                   0                   0

  Column 61

                   0


inner_code_BER =

  Columns 1 through 5

   0.157478573366635   0.154232388246953   0.150943708560079   0.147607967998056   0.144219784017227

  Columns 6 through 10

   0.140772792911425   0.137259379849709   0.133670366942018   0.129994539995991   0.126218002680909

  Columns 11 through 15

   0.122323232207890   0.118287659788949   0.114081442314908   0.109663818579070   0.104976680430415

  Columns 16 through 20

   0.099932398474753   0.094387848566439   0.088079331165393   0.080407748267556   0.069119154541467

  Columns 21 through 25

   0.002555395239422   0.002072250485564   0.001738539577491   0.001488368750321   0.001291677317379

  Columns 26 through 30

   0.001132122400528   0.000999783359723   0.000888192850092   0.000792886474344   0.000710647077310

  Columns 31 through 35

   0.000639101596885   0.000576425807392   0.000521206929567   0.000472313436693   0.000428839953459

  Columns 36 through 40

   0.000390041153546                   0                   0                   0                   0

  Columns 41 through 45

                   0                   0                   0                   0                   0

  Columns 46 through 50

                   0                   0                   0                   0                   0

  Columns 51 through 55

                   0                   0                   0                   0                   0

  Columns 56 through 60

                   0                   0                   0                   0                   0

  Column 61

                   0


inner_code_BER =

  Columns 1 through 5

   0.157478573366635   0.154232388246953   0.150943708560079   0.147607967998056   0.144219784017227

  Columns 6 through 10

   0.140772792911425   0.137259379849709   0.133670366942018   0.129994539995991   0.126218002680909

  Columns 11 through 15

   0.122323232207890   0.118287659788949   0.114081442314908   0.109663818579070   0.104976680430415

  Columns 16 through 20

   0.099932398474753   0.094387848566439   0.088079331165393   0.080407748267556   0.069119154541467

  Columns 21 through 25

   0.002555395239422   0.002072250485564   0.001738539577491   0.001488368750321   0.001291677317379

  Columns 26 through 30

   0.001132122400528   0.000999783359723   0.000888192850092   0.000792886474344   0.000710647077310

  Columns 31 through 35

   0.000639101596885   0.000576425807392   0.000521206929567   0.000472313436693   0.000428839953459

  Columns 36 through 40

   0.000390041153546   0.000355306959801                   0                   0                   0

  Columns 41 through 45

                   0                   0                   0                   0                   0

  Columns 46 through 50

                   0                   0                   0                   0                   0

  Columns 51 through 55

                   0                   0                   0                   0                   0

  Columns 56 through 60

                   0                   0                   0                   0                   0

  Column 61

                   0


inner_code_BER =

  Columns 1 through 5

   0.157478573366635   0.154232388246953   0.150943708560079   0.147607967998056   0.144219784017227

  Columns 6 through 10

   0.140772792911425   0.137259379849709   0.133670366942018   0.129994539995991   0.126218002680909

  Columns 11 through 15

   0.122323232207890   0.118287659788949   0.114081442314908   0.109663818579070   0.104976680430415

  Columns 16 through 20

   0.099932398474753   0.094387848566439   0.088079331165393   0.080407748267556   0.069119154541467

  Columns 21 through 25

   0.002555395239422   0.002072250485564   0.001738539577491   0.001488368750321   0.001291677317379

  Columns 26 through 30

   0.001132122400528   0.000999783359723   0.000888192850092   0.000792886474344   0.000710647077310

  Columns 31 through 35

   0.000639101596885   0.000576425807392   0.000521206929567   0.000472313436693   0.000428839953459

  Columns 36 through 40

   0.000390041153546   0.000355306959801   0.000324121836235                   0                   0

  Columns 41 through 45

                   0                   0                   0                   0                   0

  Columns 46 through 50

                   0                   0                   0                   0                   0

  Columns 51 through 55

                   0                   0                   0                   0                   0

  Columns 56 through 60

                   0                   0                   0                   0                   0

  Column 61

                   0


inner_code_BER =

  Columns 1 through 5

   0.157478573366635   0.154232388246953   0.150943708560079   0.147607967998056   0.144219784017227

  Columns 6 through 10

   0.140772792911425   0.137259379849709   0.133670366942018   0.129994539995991   0.126218002680909

  Columns 11 through 15

   0.122323232207890   0.118287659788949   0.114081442314908   0.109663818579070   0.104976680430415

  Columns 16 through 20

   0.099932398474753   0.094387848566439   0.088079331165393   0.080407748267556   0.069119154541467

  Columns 21 through 25

   0.002555395239422   0.002072250485564   0.001738539577491   0.001488368750321   0.001291677317379

  Columns 26 through 30

   0.001132122400528   0.000999783359723   0.000888192850092   0.000792886474344   0.000710647077310

  Columns 31 through 35

   0.000639101596885   0.000576425807392   0.000521206929567   0.000472313436693   0.000428839953459

  Columns 36 through 40

   0.000390041153546   0.000355306959801   0.000324121836235   0.000296051087007                   0

  Columns 41 through 45

                   0                   0                   0                   0                   0

  Columns 46 through 50

                   0                   0                   0                   0                   0

  Columns 51 through 55

                   0                   0                   0                   0                   0

  Columns 56 through 60

                   0                   0                   0                   0                   0

  Column 61

                   0


inner_code_BER =

  Columns 1 through 5

   0.157478573366635   0.154232388246953   0.150943708560079   0.147607967998056   0.144219784017227

  Columns 6 through 10

   0.140772792911425   0.137259379849709   0.133670366942018   0.129994539995991   0.126218002680909

  Columns 11 through 15

   0.122323232207890   0.118287659788949   0.114081442314908   0.109663818579070   0.104976680430415

  Columns 16 through 20

   0.099932398474753   0.094387848566439   0.088079331165393   0.080407748267556   0.069119154541467

  Columns 21 through 25

   0.002555395239422   0.002072250485564   0.001738539577491   0.001488368750321   0.001291677317379

  Columns 26 through 30

   0.001132122400528   0.000999783359723   0.000888192850092   0.000792886474344   0.000710647077310

  Columns 31 through 35

   0.000639101596885   0.000576425807392   0.000521206929567   0.000472313436693   0.000428839953459

  Columns 36 through 40

   0.000390041153546   0.000355306959801   0.000324121836235   0.000296051087007   0.000270729474894

  Columns 41 through 45

                   0                   0                   0                   0                   0

  Columns 46 through 50

                   0                   0                   0                   0                   0

  Columns 51 through 55

                   0                   0                   0                   0                   0

  Columns 56 through 60

                   0                   0                   0                   0                   0

  Column 61

                   0


inner_code_BER =

  Columns 1 through 5

   0.157478573366635   0.154232388246953   0.150943708560079   0.147607967998056   0.144219784017227

  Columns 6 through 10

   0.140772792911425   0.137259379849709   0.133670366942018   0.129994539995991   0.126218002680909

  Columns 11 through 15

   0.122323232207890   0.118287659788949   0.114081442314908   0.109663818579070   0.104976680430415

  Columns 16 through 20

   0.099932398474753   0.094387848566439   0.088079331165393   0.080407748267556   0.069119154541467

  Columns 21 through 25

   0.002555395239422   0.002072250485564   0.001738539577491   0.001488368750321   0.001291677317379

  Columns 26 through 30

   0.001132122400528   0.000999783359723   0.000888192850092   0.000792886474344   0.000710647077310

  Columns 31 through 35

   0.000639101596885   0.000576425807392   0.000521206929567   0.000472313436693   0.000428839953459

  Columns 36 through 40

   0.000390041153546   0.000355306959801   0.000324121836235   0.000296051087007   0.000270729474894

  Columns 41 through 45

   0.000247841200458                   0                   0                   0                   0

  Columns 46 through 50

                   0                   0                   0                   0                   0

  Columns 51 through 55

                   0                   0                   0                   0                   0

  Columns 56 through 60

                   0                   0                   0                   0                   0

  Column 61

                   0


inner_code_BER =

  Columns 1 through 5

   0.157478573366635   0.154232388246953   0.150943708560079   0.147607967998056   0.144219784017227

  Columns 6 through 10

   0.140772792911425   0.137259379849709   0.133670366942018   0.129994539995991   0.126218002680909

  Columns 11 through 15

   0.122323232207890   0.118287659788949   0.114081442314908   0.109663818579070   0.104976680430415

  Columns 16 through 20

   0.099932398474753   0.094387848566439   0.088079331165393   0.080407748267556   0.069119154541467

  Columns 21 through 25

   0.002555395239422   0.002072250485564   0.001738539577491   0.001488368750321   0.001291677317379

  Columns 26 through 30

   0.001132122400528   0.000999783359723   0.000888192850092   0.000792886474344   0.000710647077310

  Columns 31 through 35

   0.000639101596885   0.000576425807392   0.000521206929567   0.000472313436693   0.000428839953459

  Columns 36 through 40

   0.000390041153546   0.000355306959801   0.000324121836235   0.000296051087007   0.000270729474894

  Columns 41 through 45

   0.000247841200458   0.000227112229288                   0                   0                   0

  Columns 46 through 50

                   0                   0                   0                   0                   0

  Columns 51 through 55

                   0                   0                   0                   0                   0

  Columns 56 through 60

                   0                   0                   0                   0                   0

  Column 61

                   0


inner_code_BER =

  Columns 1 through 5

   0.157478573366635   0.154232388246953   0.150943708560079   0.147607967998056   0.144219784017227

  Columns 6 through 10

   0.140772792911425   0.137259379849709   0.133670366942018   0.129994539995991   0.126218002680909

  Columns 11 through 15

   0.122323232207890   0.118287659788949   0.114081442314908   0.109663818579070   0.104976680430415

  Columns 16 through 20

   0.099932398474753   0.094387848566439   0.088079331165393   0.080407748267556   0.069119154541467

  Columns 21 through 25

   0.002555395239422   0.002072250485564   0.001738539577491   0.001488368750321   0.001291677317379

  Columns 26 through 30

   0.001132122400528   0.000999783359723   0.000888192850092   0.000792886474344   0.000710647077310

  Columns 31 through 35

   0.000639101596885   0.000576425807392   0.000521206929567   0.000472313436693   0.000428839953459

  Columns 36 through 40

   0.000390041153546   0.000355306959801   0.000324121836235   0.000296051087007   0.000270729474894

  Columns 41 through 45

   0.000247841200458   0.000227112229288   0.000208310336251                   0                   0

  Columns 46 through 50

                   0                   0                   0                   0                   0

  Columns 51 through 55

                   0                   0                   0                   0                   0

  Columns 56 through 60

                   0                   0                   0                   0                   0

  Column 61

                   0


inner_code_BER =

  Columns 1 through 5

   0.157478573366635   0.154232388246953   0.150943708560079   0.147607967998056   0.144219784017227

  Columns 6 through 10

   0.140772792911425   0.137259379849709   0.133670366942018   0.129994539995991   0.126218002680909

  Columns 11 through 15

   0.122323232207890   0.118287659788949   0.114081442314908   0.109663818579070   0.104976680430415

  Columns 16 through 20

   0.099932398474753   0.094387848566439   0.088079331165393   0.080407748267556   0.069119154541467

  Columns 21 through 25

   0.002555395239422   0.002072250485564   0.001738539577491   0.001488368750321   0.001291677317379

  Columns 26 through 30

   0.001132122400528   0.000999783359723   0.000888192850092   0.000792886474344   0.000710647077310

  Columns 31 through 35

   0.000639101596885   0.000576425807392   0.000521206929567   0.000472313436693   0.000428839953459

  Columns 36 through 40

   0.000390041153546   0.000355306959801   0.000324121836235   0.000296051087007   0.000270729474894

  Columns 41 through 45

   0.000247841200458   0.000227112229288   0.000208310336251   0.000191231092315                   0

  Columns 46 through 50

                   0                   0                   0                   0                   0

  Columns 51 through 55

                   0                   0                   0                   0                   0

  Columns 56 through 60

                   0                   0                   0                   0                   0

  Column 61

                   0


inner_code_BER =

  Columns 1 through 5

   0.157478573366635   0.154232388246953   0.150943708560079   0.147607967998056   0.144219784017227

  Columns 6 through 10

   0.140772792911425   0.137259379849709   0.133670366942018   0.129994539995991   0.126218002680909

  Columns 11 through 15

   0.122323232207890   0.118287659788949   0.114081442314908   0.109663818579070   0.104976680430415

  Columns 16 through 20

   0.099932398474753   0.094387848566439   0.088079331165393   0.080407748267556   0.069119154541467

  Columns 21 through 25

   0.002555395239422   0.002072250485564   0.001738539577491   0.001488368750321   0.001291677317379

  Columns 26 through 30

   0.001132122400528   0.000999783359723   0.000888192850092   0.000792886474344   0.000710647077310

  Columns 31 through 35

   0.000639101596885   0.000576425807392   0.000521206929567   0.000472313436693   0.000428839953459

  Columns 36 through 40

   0.000390041153546   0.000355306959801   0.000324121836235   0.000296051087007   0.000270729474894

  Columns 41 through 45

   0.000247841200458   0.000227112229288   0.000208310336251   0.000191231092315   0.000175693676829

  Columns 46 through 50

                   0                   0                   0                   0                   0

  Columns 51 through 55

                   0                   0                   0                   0                   0

  Columns 56 through 60

                   0                   0                   0                   0                   0

  Column 61

                   0


inner_code_BER =

  Columns 1 through 5

   0.157478573366635   0.154232388246953   0.150943708560079   0.147607967998056   0.144219784017227

  Columns 6 through 10

   0.140772792911425   0.137259379849709   0.133670366942018   0.129994539995991   0.126218002680909

  Columns 11 through 15

   0.122323232207890   0.118287659788949   0.114081442314908   0.109663818579070   0.104976680430415

  Columns 16 through 20

   0.099932398474753   0.094387848566439   0.088079331165393   0.080407748267556   0.069119154541467

  Columns 21 through 25

   0.002555395239422   0.002072250485564   0.001738539577491   0.001488368750321   0.001291677317379

  Columns 26 through 30

   0.001132122400528   0.000999783359723   0.000888192850092   0.000792886474344   0.000710647077310

  Columns 31 through 35

   0.000639101596885   0.000576425807392   0.000521206929567   0.000472313436693   0.000428839953459

  Columns 36 through 40

   0.000390041153546   0.000355306959801   0.000324121836235   0.000296051087007   0.000270729474894

  Columns 41 through 45

   0.000247841200458   0.000227112229288   0.000208310336251   0.000191231092315   0.000175693676829

  Columns 46 through 50

   0.000161543063334                   0                   0                   0                   0

  Columns 51 through 55

                   0                   0                   0                   0                   0

  Columns 56 through 60

                   0                   0                   0                   0                   0

  Column 61

                   0


inner_code_BER =

  Columns 1 through 5

   0.157478573366635   0.154232388246953   0.150943708560079   0.147607967998056   0.144219784017227

  Columns 6 through 10

   0.140772792911425   0.137259379849709   0.133670366942018   0.129994539995991   0.126218002680909

  Columns 11 through 15

   0.122323232207890   0.118287659788949   0.114081442314908   0.109663818579070   0.104976680430415

  Columns 16 through 20

   0.099932398474753   0.094387848566439   0.088079331165393   0.080407748267556   0.069119154541467

  Columns 21 through 25

   0.002555395239422   0.002072250485564   0.001738539577491   0.001488368750321   0.001291677317379

  Columns 26 through 30

   0.001132122400528   0.000999783359723   0.000888192850092   0.000792886474344   0.000710647077310

  Columns 31 through 35

   0.000639101596885   0.000576425807392   0.000521206929567   0.000472313436693   0.000428839953459

  Columns 36 through 40

   0.000390041153546   0.000355306959801   0.000324121836235   0.000296051087007   0.000270729474894

  Columns 41 through 45

   0.000247841200458   0.000227112229288   0.000208310336251   0.000191231092315   0.000175693676829

  Columns 46 through 50

   0.000161543063334   0.000148638069204                   0                   0                   0

  Columns 51 through 55

                   0                   0                   0                   0                   0

  Columns 56 through 60

                   0                   0                   0                   0                   0

  Column 61

                   0


inner_code_BER =

  Columns 1 through 5

   0.157478573366635   0.154232388246953   0.150943708560079   0.147607967998056   0.144219784017227

  Columns 6 through 10

   0.140772792911425   0.137259379849709   0.133670366942018   0.129994539995991   0.126218002680909

  Columns 11 through 15

   0.122323232207890   0.118287659788949   0.114081442314908   0.109663818579070   0.104976680430415

  Columns 16 through 20

   0.099932398474753   0.094387848566439   0.088079331165393   0.080407748267556   0.069119154541467

  Columns 21 through 25

   0.002555395239422   0.002072250485564   0.001738539577491   0.001488368750321   0.001291677317379

  Columns 26 through 30

   0.001132122400528   0.000999783359723   0.000888192850092   0.000792886474344   0.000710647077310

  Columns 31 through 35

   0.000639101596885   0.000576425807392   0.000521206929567   0.000472313436693   0.000428839953459

  Columns 36 through 40

   0.000390041153546   0.000355306959801   0.000324121836235   0.000296051087007   0.000270729474894

  Columns 41 through 45

   0.000247841200458   0.000227112229288   0.000208310336251   0.000191231092315   0.000175693676829

  Columns 46 through 50

   0.000161543063334   0.000148638069204   0.000136857861688                   0                   0

  Columns 51 through 55

                   0                   0                   0                   0                   0

  Columns 56 through 60

                   0                   0                   0                   0                   0

  Column 61

                   0


inner_code_BER =

  Columns 1 through 5

   0.157478573366635   0.154232388246953   0.150943708560079   0.147607967998056   0.144219784017227

  Columns 6 through 10

   0.140772792911425   0.137259379849709   0.133670366942018   0.129994539995991   0.126218002680909

  Columns 11 through 15

   0.122323232207890   0.118287659788949   0.114081442314908   0.109663818579070   0.104976680430415

  Columns 16 through 20

   0.099932398474753   0.094387848566439   0.088079331165393   0.080407748267556   0.069119154541467

  Columns 21 through 25

   0.002555395239422   0.002072250485564   0.001738539577491   0.001488368750321   0.001291677317379

  Columns 26 through 30

   0.001132122400528   0.000999783359723   0.000888192850092   0.000792886474344   0.000710647077310

  Columns 31 through 35

   0.000639101596885   0.000576425807392   0.000521206929567   0.000472313436693   0.000428839953459

  Columns 36 through 40

   0.000390041153546   0.000355306959801   0.000324121836235   0.000296051087007   0.000270729474894

  Columns 41 through 45

   0.000247841200458   0.000227112229288   0.000208310336251   0.000191231092315   0.000175693676829

  Columns 46 through 50

   0.000161543063334   0.000148638069204   0.000136857861688   0.000126093500504                   0

  Columns 51 through 55

                   0                   0                   0                   0                   0

  Columns 56 through 60

                   0                   0                   0                   0                   0

  Column 61

                   0


inner_code_BER =

  Columns 1 through 5

   0.157478573366635   0.154232388246953   0.150943708560079   0.147607967998056   0.144219784017227

  Columns 6 through 10

   0.140772792911425   0.137259379849709   0.133670366942018   0.129994539995991   0.126218002680909

  Columns 11 through 15

   0.122323232207890   0.118287659788949   0.114081442314908   0.109663818579070   0.104976680430415

  Columns 16 through 20

   0.099932398474753   0.094387848566439   0.088079331165393   0.080407748267556   0.069119154541467

  Columns 21 through 25

   0.002555395239422   0.002072250485564   0.001738539577491   0.001488368750321   0.001291677317379

  Columns 26 through 30

   0.001132122400528   0.000999783359723   0.000888192850092   0.000792886474344   0.000710647077310

  Columns 31 through 35

   0.000639101596885   0.000576425807392   0.000521206929567   0.000472313436693   0.000428839953459

  Columns 36 through 40

   0.000390041153546   0.000355306959801   0.000324121836235   0.000296051087007   0.000270729474894

  Columns 41 through 45

   0.000247841200458   0.000227112229288   0.000208310336251   0.000191231092315   0.000175693676829

  Columns 46 through 50

   0.000161543063334   0.000148638069204   0.000136857861688   0.000126093500504   0.000116248135224

  Columns 51 through 55

                   0                   0                   0                   0                   0

  Columns 56 through 60

                   0                   0                   0                   0                   0

  Column 61

                   0


inner_code_BER =

  Columns 1 through 5

   0.157478573366635   0.154232388246953   0.150943708560079   0.147607967998056   0.144219784017227

  Columns 6 through 10

   0.140772792911425   0.137259379849709   0.133670366942018   0.129994539995991   0.126218002680909

  Columns 11 through 15

   0.122323232207890   0.118287659788949   0.114081442314908   0.109663818579070   0.104976680430415

  Columns 16 through 20

   0.099932398474753   0.094387848566439   0.088079331165393   0.080407748267556   0.069119154541467

  Columns 21 through 25

   0.002555395239422   0.002072250485564   0.001738539577491   0.001488368750321   0.001291677317379

  Columns 26 through 30

   0.001132122400528   0.000999783359723   0.000888192850092   0.000792886474344   0.000710647077310

  Columns 31 through 35

   0.000639101596885   0.000576425807392   0.000521206929567   0.000472313436693   0.000428839953459

  Columns 36 through 40

   0.000390041153546   0.000355306959801   0.000324121836235   0.000296051087007   0.000270729474894

  Columns 41 through 45

   0.000247841200458   0.000227112229288   0.000208310336251   0.000191231092315   0.000175693676829

  Columns 46 through 50

   0.000161543063334   0.000148638069204   0.000136857861688   0.000126093500504   0.000116248135224

  Columns 51 through 55

   0.000107235401848                   0                   0                   0                   0

  Columns 56 through 60

                   0                   0                   0                   0                   0

  Column 61

                   0


inner_code_BER =

  Columns 1 through 5

   0.157478573366635   0.154232388246953   0.150943708560079   0.147607967998056   0.144219784017227

  Columns 6 through 10

   0.140772792911425   0.137259379849709   0.133670366942018   0.129994539995991   0.126218002680909

  Columns 11 through 15

   0.122323232207890   0.118287659788949   0.114081442314908   0.109663818579070   0.104976680430415

  Columns 16 through 20

   0.099932398474753   0.094387848566439   0.088079331165393   0.080407748267556   0.069119154541467

  Columns 21 through 25

   0.002555395239422   0.002072250485564   0.001738539577491   0.001488368750321   0.001291677317379

  Columns 26 through 30

   0.001132122400528   0.000999783359723   0.000888192850092   0.000792886474344   0.000710647077310

  Columns 31 through 35

   0.000639101596885   0.000576425807392   0.000521206929567   0.000472313436693   0.000428839953459

  Columns 36 through 40

   0.000390041153546   0.000355306959801   0.000324121836235   0.000296051087007   0.000270729474894

  Columns 41 through 45

   0.000247841200458   0.000227112229288   0.000208310336251   0.000191231092315   0.000175693676829

  Columns 46 through 50

   0.000161543063334   0.000148638069204   0.000136857861688   0.000126093500504   0.000116248135224

  Columns 51 through 55

   0.000107235401848   0.000098978087765                   0                   0                   0

  Columns 56 through 60

                   0                   0                   0                   0                   0

  Column 61

                   0

µ±Ç°ÄÚÂëÎóÂëÂÊÒÑµÍÓÚÄ¿±êÎóÂëÂÊ£¬ÐÅÔë±ÈÎª5.10 dB
Elapsed time is 21871.259243 seconds.
