# Supplementary material for: An Efficient Design of Systematic Rateless Codes
Source: Hindawi journal article supplement (doi:10.1155/2020/8068414), 2020-05-19
Supplement: f1 [file 8068414.f1.zip › supplementary files/Matlab_code_for_Figure1/BER_by_DDE/仿真结果/BER_by_DDE_rician_sigma2_1_dist0_Ns.txt]

ÐÅµÀÎªAWGNÐÅµÀ

inner_code_rate =

  Columns 1 through 5

   1.000000000000000   0.909090909090909   0.833333333333333   0.769230769230769   0.714285714285714

  Columns 6 through 10

   0.666666666666667   0.625000000000000   0.588235294117647   0.555555555555556   0.526315789473684

  Columns 11 through 15

   0.500000000000000   0.476190476190476   0.454545454545455   0.434782608695652   0.416666666666667

  Columns 16 through 20

   0.400000000000000   0.384615384615385   0.370370370370370   0.357142857142857   0.344827586206897

  Column 21

   0.333333333333333


code_rate_vec =

  Columns 1 through 5

   0.980392156862745   0.891265597147950   0.816993464052288   0.754147812971342   0.700280112044818

  Columns 6 through 10

   0.653594771241830   0.612745098039216   0.576701268742791   0.544662309368192   0.515995872033024

  Columns 11 through 15

   0.490196078431373   0.466853408029879   0.445632798573975   0.426257459505541   0.408496732026144

  Columns 16 through 20

   0.392156862745098   0.377073906485671   0.363108206245461   0.350140056022409   0.338066260987153

  Column 21

   0.326797385620915


sigma2 =

   0.970000000000000


EsN0indB =

  -2.878017299302260


EbN0indB_vec =

  Columns 1 through 5

  -2.792015581683085  -2.378088730100834  -2.000203121206837  -1.652582058614716  -1.330735224900704

  Columns 6 through 10

  -1.031102991126271  -0.750815755123836  -0.487526367900345  -0.239290530650024  -0.004479572154795

  Columns 11 through 15

   0.218284374956727   0.430177365656108   0.632211226538978   0.825262778492844   1.010096835432975

  Columns 16 through 20

   1.187384505037291   1.357717898025095   1.521622059906789   1.679564731739108   1.831964397306476

  Column 21

   1.979196965513541


distr_num =

     0

ÖÆ±í³É¹¦
µ±Ç°Ñ¡ÔñRaptorÂë
µ±Ç°Ñ¡Ôñ·ÇÏµÍ³Âë

out_node_index =

     1     2     3     4     5     8     9    19    65    66


ans =

  Columns 1 through 5

   0.007969000000000   0.493570000000000   0.166220000000000   0.072646000000000   0.082558000000000

  Columns 6 through 10

   0.056058000000000   0.037229000000000   0.055590000000000   0.025023000000000   0.003135000000000


inner_code_BER =

  Columns 1 through 5

   0.491637464328669                   0                   0                   0                   0

  Columns 6 through 10

                   0                   0                   0                   0                   0

  Columns 11 through 15

                   0                   0                   0                   0                   0

  Columns 16 through 20

                   0                   0                   0                   0                   0

  Column 21

                   0


outer_code_BER =

  Columns 1 through 5

   0.491637464328670                   0                   0                   0                   0

  Columns 6 through 10

                   0                   0                   0                   0                   0

  Columns 11 through 15

                   0                   0                   0                   0                   0

  Columns 16 through 20

                   0                   0                   0                   0                   0

  Column 21

                   0


inner_code_BER =

  Columns 1 through 5

   0.491637464328669   0.488666229334563                   0                   0                   0

  Columns 6 through 10

                   0                   0                   0                   0                   0

  Columns 11 through 15

                   0                   0                   0                   0                   0

  Columns 16 through 20

                   0                   0                   0                   0                   0

  Column 21

                   0


outer_code_BER =

  Columns 1 through 5

   0.491637464328670   0.488666229334562                   0                   0                   0

  Columns 6 through 10

                   0                   0                   0                   0                   0

  Columns 11 through 15

                   0                   0                   0                   0                   0

  Columns 16 through 20

                   0                   0                   0                   0                   0

  Column 21

                   0


inner_code_BER =

  Columns 1 through 5

   0.491637464328669   0.488666229334563   0.484316415588379                   0                   0

  Columns 6 through 10

                   0                   0                   0                   0                   0

  Columns 11 through 15

                   0                   0                   0                   0                   0

  Columns 16 through 20

                   0                   0                   0                   0                   0

  Column 21

                   0


outer_code_BER =

  Columns 1 through 5

   0.491637464328670   0.488666229334562   0.484316415588381                   0                   0

  Columns 6 through 10

                   0                   0                   0                   0                   0

  Columns 11 through 15

                   0                   0                   0                   0                   0

  Columns 16 through 20

                   0                   0                   0                   0                   0

  Column 21

                   0


inner_code_BER =

  Columns 1 through 5

   0.491637464328669   0.488666229334563   0.484316415588379   0.477969277140839                   0

  Columns 6 through 10

                   0                   0                   0                   0                   0

  Columns 11 through 15

                   0                   0                   0                   0                   0

  Columns 16 through 20

                   0                   0                   0                   0                   0

  Column 21

                   0


outer_code_BER =

  Columns 1 through 5

   0.491637464328670   0.488666229334562   0.484316415588381   0.477969277140840                   0

  Columns 6 through 10

                   0                   0                   0                   0                   0

  Columns 11 through 15

                   0                   0                   0                   0                   0

  Columns 16 through 20

                   0                   0                   0                   0                   0

  Column 21

                   0


inner_code_BER =

  Columns 1 through 5

   0.491637464328669   0.488666229334563   0.484316415588379   0.477969277140839   0.468866960000920

  Columns 6 through 10

                   0                   0                   0                   0                   0

  Columns 11 through 15

                   0                   0                   0                   0                   0

  Columns 16 through 20

                   0                   0                   0                   0                   0

  Column 21

                   0


outer_code_BER =

  Columns 1 through 5

   0.491637464328670   0.488666229334562   0.484316415588381   0.477969277140840   0.468866960000922

  Columns 6 through 10

                   0                   0                   0                   0                   0

  Columns 11 through 15

                   0                   0                   0                   0                   0

  Columns 16 through 20

                   0                   0                   0                   0                   0

  Column 21

                   0


inner_code_BER =

  Columns 1 through 5

   0.491637464328669   0.488666229334563   0.484316415588379   0.477969277140839   0.468866960000920

  Columns 6 through 10

   0.455906811402561                   0                   0                   0                   0

  Columns 11 through 15

                   0                   0                   0                   0                   0

  Columns 16 through 20

                   0                   0                   0                   0                   0

  Column 21

                   0


outer_code_BER =

  Columns 1 through 5

   0.491637464328670   0.488666229334562   0.484316415588381   0.477969277140840   0.468866960000922

  Columns 6 through 10

   0.455906811402561                   0                   0                   0                   0

  Columns 11 through 15

                   0                   0                   0                   0                   0

  Columns 16 through 20

                   0                   0                   0                   0                   0

  Column 21

                   0


inner_code_BER =

  Columns 1 through 5

   0.491637464328669   0.488666229334563   0.484316415588379   0.477969277140839   0.468866960000920

  Columns 6 through 10

   0.455906811402561   0.436881562879801                   0                   0                   0

  Columns 11 through 15

                   0                   0                   0                   0                   0

  Columns 16 through 20

                   0                   0                   0                   0                   0

  Column 21

                   0


outer_code_BER =

  Columns 1 through 5

   0.491637464328670   0.488666229334562   0.484316415588381   0.477969277140840   0.468866960000922

  Columns 6 through 10

   0.455906811402561   0.436881562879802                   0                   0                   0

  Columns 11 through 15

                   0                   0                   0                   0                   0

  Columns 16 through 20

                   0                   0                   0                   0                   0

  Column 21

                   0


inner_code_BER =

  Columns 1 through 5

   0.491637464328669   0.488666229334563   0.484316415588379   0.477969277140839   0.468866960000920

  Columns 6 through 10

   0.455906811402561   0.436881562879801   0.406203415904140                   0                   0

  Columns 11 through 15

                   0                   0                   0                   0                   0

  Columns 16 through 20

                   0                   0                   0                   0                   0

  Column 21

                   0


outer_code_BER =

  Columns 1 through 5

   0.491637464328670   0.488666229334562   0.484316415588381   0.477969277140840   0.468866960000922

  Columns 6 through 10

   0.455906811402561   0.436881562879802   0.406203415904140                   0                   0

  Columns 11 through 15

                   0                   0                   0                   0                   0

  Columns 16 through 20

                   0                   0                   0                   0                   0

  Column 21

                   0


inner_code_BER =

  Columns 1 through 5

   0.491637464328669   0.488666229334563   0.484316415588379   0.477969277140839   0.468866960000920

  Columns 6 through 10

   0.455906811402561   0.436881562879801   0.406203415904140   0.347986087238784                   0

  Columns 11 through 15

                   0                   0                   0                   0                   0

  Columns 16 through 20

                   0                   0                   0                   0                   0

  Column 21

                   0


outer_code_BER =

  Columns 1 through 5

   0.491637464328670   0.488666229334562   0.484316415588381   0.477969277140840   0.468866960000922

  Columns 6 through 10

   0.455906811402561   0.436881562879802   0.406203415904140   0.347986087238785                   0

  Columns 11 through 15

                   0                   0                   0                   0                   0

  Columns 16 through 20

                   0                   0                   0                   0                   0

  Column 21

                   0


inner_code_BER =

  Columns 1 through 5

   0.491637464328669   0.488666229334563   0.484316415588379   0.477969277140839   0.468866960000920

  Columns 6 through 10

   0.455906811402561   0.436881562879801   0.406203415904140   0.347986087238784   0.231460245313476

  Columns 11 through 15

                   0                   0                   0                   0                   0

  Columns 16 through 20

                   0                   0                   0                   0                   0

  Column 21

                   0


outer_code_BER =

  Columns 1 through 5

   0.491637464328670   0.488666229334562   0.484316415588381   0.477969277140840   0.468866960000922

  Columns 6 through 10

   0.455906811402561   0.436881562879802   0.406203415904140   0.347986087238785   0.231460245313477

  Columns 11 through 15

                   0                   0                   0                   0                   0

  Columns 16 through 20

                   0                   0                   0                   0                   0

  Column 21

                   0


inner_code_BER =

  Columns 1 through 5

   0.491637464328669   0.488666229334563   0.484316415588379   0.477969277140839   0.468866960000920

  Columns 6 through 10

   0.455906811402561   0.436881562879801   0.406203415904140   0.347986087238784   0.231460245313476

  Columns 11 through 15

   0.086052303138142                   0                   0                   0                   0

  Columns 16 through 20

                   0                   0                   0                   0                   0

  Column 21

                   0


outer_code_BER =

  Columns 1 through 5

   0.491637464328670   0.488666229334562   0.484316415588381   0.477969277140840   0.468866960000922

  Columns 6 through 10

   0.455906811402561   0.436881562879802   0.406203415904140   0.347986087238785   0.231460245313477

  Columns 11 through 15

   0.086052303138142                   0                   0                   0                   0

  Columns 16 through 20

                   0                   0                   0                   0                   0

  Column 21

                   0


inner_code_BER =

  Columns 1 through 5

   0.491637464328669   0.488666229334563   0.484316415588379   0.477969277140839   0.468866960000920

  Columns 6 through 10

   0.455906811402561   0.436881562879801   0.406203415904140   0.347986087238784   0.231460245313476

  Columns 11 through 15

   0.086052303138142   0.002738752216338                   0                   0                   0

  Columns 16 through 20

                   0                   0                   0                   0                   0

  Column 21

                   0


outer_code_BER =

  Columns 1 through 5

   0.491637464328670   0.488666229334562   0.484316415588381   0.477969277140840   0.468866960000922

  Columns 6 through 10

   0.455906811402561   0.436881562879802   0.406203415904140   0.347986087238785   0.231460245313477

  Columns 11 through 15

   0.086052303138142   0.000000000112047                   0                   0                   0

  Columns 16 through 20

                   0                   0                   0                   0                   0

  Column 21

                   0

µ±Ç°ÍâÂëÎóÂëÂÊÒÑµÍÓÚÄ¿±êÎóÂëÂÊ£¬×ÜÂëÂÊÎª0.47 dB

inner_code_BER =

  Columns 1 through 5

   0.491637464328669   0.488666229334563   0.484316415588379   0.477969277140839   0.468866960000920

  Columns 6 through 10

   0.455906811402561   0.436881562879801   0.406203415904140   0.347986087238784   0.231460245313476

  Columns 11 through 15

   0.086052303138142   0.002738752216338   0.001403428625763                   0                   0

  Columns 16 through 20

                   0                   0                   0                   0                   0

  Column 21

                   0


inner_code_BER =

  Columns 1 through 5

   0.491637464328669   0.488666229334563   0.484316415588379   0.477969277140839   0.468866960000920

  Columns 6 through 10

   0.455906811402561   0.436881562879801   0.406203415904140   0.347986087238784   0.231460245313476

  Columns 11 through 15

   0.086052303138142   0.002738752216338   0.001403428625763   0.000897926232426                   0

  Columns 16 through 20

                   0                   0                   0                   0                   0

  Column 21

                   0


inner_code_BER =

  Columns 1 through 5

   0.491637464328669   0.488666229334563   0.484316415588379   0.477969277140839   0.468866960000920

  Columns 6 through 10

   0.455906811402561   0.436881562879801   0.406203415904140   0.347986087238784   0.231460245313476

  Columns 11 through 15

   0.086052303138142   0.002738752216338   0.001403428625763   0.000897926232426   0.000617620439027

  Columns 16 through 20

                   0                   0                   0                   0                   0

  Column 21

                   0


inner_code_BER =

  Columns 1 through 5

   0.491637464328669   0.488666229334563   0.484316415588379   0.477969277140839   0.468866960000920

  Columns 6 through 10

   0.455906811402561   0.436881562879801   0.406203415904140   0.347986087238784   0.231460245313476

  Columns 11 through 15

   0.086052303138142   0.002738752216338   0.001403428625763   0.000897926232426   0.000617620439027

  Columns 16 through 20

   0.000441135299699                   0                   0                   0                   0

  Column 21

                   0


inner_code_BER =

  Columns 1 through 5

   0.491637464328669   0.488666229334563   0.484316415588379   0.477969277140839   0.468866960000920

  Columns 6 through 10

   0.455906811402561   0.436881562879801   0.406203415904140   0.347986087238784   0.231460245313476

  Columns 11 through 15

   0.086052303138142   0.002738752216338   0.001403428625763   0.000897926232426   0.000617620439027

  Columns 16 through 20

   0.000441135299699   0.000322478855106                   0                   0                   0

  Column 21

                   0


inner_code_BER =

  Columns 1 through 5

   0.491637464328669   0.488666229334563   0.484316415588379   0.477969277140839   0.468866960000920

  Columns 6 through 10

   0.455906811402561   0.436881562879801   0.406203415904140   0.347986087238784   0.231460245313476

  Columns 11 through 15

   0.086052303138142   0.002738752216338   0.001403428625763   0.000897926232426   0.000617620439027

  Columns 16 through 20

   0.000441135299699   0.000322478855106   0.000239449215460                   0                   0

  Column 21

                   0


inner_code_BER =

  Columns 1 through 5

   0.491637464328669   0.488666229334563   0.484316415588379   0.477969277140839   0.468866960000920

  Columns 6 through 10

   0.455906811402561   0.436881562879801   0.406203415904140   0.347986087238784   0.231460245313476

  Columns 11 through 15

   0.086052303138142   0.002738752216338   0.001403428625763   0.000897926232426   0.000617620439027

  Columns 16 through 20

   0.000441135299699   0.000322478855106   0.000239449215460   0.000179786665724                   0

  Column 21

                   0


inner_code_BER =

  Columns 1 through 5

   0.491637464328669   0.488666229334563   0.484316415588379   0.477969277140839   0.468866960000920

  Columns 6 through 10

   0.455906811402561   0.436881562879801   0.406203415904140   0.347986087238784   0.231460245313476

  Columns 11 through 15

   0.086052303138142   0.002738752216338   0.001403428625763   0.000897926232426   0.000617620439027

  Columns 16 through 20

   0.000441135299699   0.000322478855106   0.000239449215460   0.000179786665724   0.000136101071285

  Column 21

                   0


inner_code_BER =

  Columns 1 through 5

   0.491637464328669   0.488666229334563   0.484316415588379   0.477969277140839   0.468866960000920

  Columns 6 through 10

   0.455906811402561   0.436881562879801   0.406203415904140   0.347986087238784   0.231460245313476

  Columns 11 through 15

   0.086052303138142   0.002738752216338   0.001403428625763   0.000897926232426   0.000617620439027

  Columns 16 through 20

   0.000441135299699   0.000322478855106   0.000239449215460   0.000179786665724   0.000136101071285

  Column 21

   0.000103674849235

Elapsed time is 8003.428641 seconds.
