# Supplementary material for: An Efficient Design of Systematic Rateless Codes
Source: Hindawi journal article supplement (doi:10.1155/2020/8068414), 2020-05-19
Supplement: f1 [file 8068414.f1.zip › supplementary files/Matlab_code_for_Figure1/BER_by_DDE/仿真结果/BER_by_DDE_rician_sigma2_1_dist0_s.txt]

ÐÅµÀÎªAWGNÐÅµÀ

inner_code_rate =

  Columns 1 through 5

   0.500000000000000   0.476190476190476   0.454545454545455   0.434782608695652   0.416666666666667

  Columns 6 through 10

   0.400000000000000   0.384615384615385   0.370370370370370   0.357142857142857   0.344827586206897

  Columns 11 through 15

   0.333333333333333   0.322580645161290   0.312500000000000   0.303030303030303   0.294117647058824

  Columns 16 through 20

   0.285714285714286   0.277777777777778   0.270270270270270   0.263157894736842   0.256410256410256

  Column 21

   0.250000000000000


code_rate_vec =

  Columns 1 through 5

   0.490196078431373   0.466853408029879   0.445632798573975   0.426257459505541   0.408496732026144

  Columns 6 through 10

   0.392156862745098   0.377073906485671   0.363108206245461   0.350140056022409   0.338066260987153

  Columns 11 through 15

   0.326797385620915   0.316255534471853   0.306372549019608   0.297088532382650   0.288350634371396

  Columns 16 through 20

   0.280112044817927   0.272331154684096   0.264970853206147   0.257997936016512   0.251382604323781

  Column 21

   0.245098039215686


sigma2 =

   0.970000000000000


EsN0indB =

  -2.878017299302260


EbN0indB_vec =

  Columns 1 through 5

   0.218284374956727   0.430177365656108   0.632211226538978   0.825262778492844   1.010096835432975

  Columns 6 through 10

   1.187384505037291   1.357717898025095   1.521622059906789   1.679564731739108   1.831964397306476

  Columns 11 through 15

   1.979196965513541   2.121601356659643   2.259484201515976   2.393123817095790   2.522773588739466

  Columns 16 through 20

   2.648664861819673   2.771009425989788   2.890001658986866   3.005820384485017   3.118630488581908

  Column 21

   3.228584331596539


distr_num =

     0

ÖÆ±í³É¹¦
µ±Ç°Ñ¡ÔñRaptorÂë
µ±Ç°Ñ¡ÔñÏµÍ³Âë

out_node_index =

     1     2     3     4     5     8     9    19    65    66


ans =

  Columns 1 through 5

   0.007969000000000   0.493570000000000   0.166220000000000   0.072646000000000   0.082558000000000

  Columns 6 through 10

   0.056058000000000   0.037229000000000   0.055590000000000   0.025023000000000   0.003135000000000


inner_code_BER =

  Columns 1 through 5

   0.076394271428160                   0                   0                   0                   0

  Columns 6 through 10

                   0                   0                   0                   0                   0

  Columns 11 through 15

                   0                   0                   0                   0                   0

  Columns 16 through 20

                   0                   0                   0                   0                   0

  Column 21

                   0


outer_code_BER =

  Columns 1 through 5

   0.076394271428185                   0                   0                   0                   0

  Columns 6 through 10

                   0                   0                   0                   0                   0

  Columns 11 through 15

                   0                   0                   0                   0                   0

  Columns 16 through 20

                   0                   0                   0                   0                   0

  Column 21

                   0


inner_code_BER =

  Columns 1 through 5

   0.076394271428160   0.066448618814251                   0                   0                   0

  Columns 6 through 10

                   0                   0                   0                   0                   0

  Columns 11 through 15

                   0                   0                   0                   0                   0

  Columns 16 through 20

                   0                   0                   0                   0                   0

  Column 21

                   0


outer_code_BER =

  Columns 1 through 5

   0.076394271428185   0.066448618815043                   0                   0                   0

  Columns 6 through 10

                   0                   0                   0                   0                   0

  Columns 11 through 15

                   0                   0                   0                   0                   0

  Columns 16 through 20

                   0                   0                   0                   0                   0

  Column 21

                   0


inner_code_BER =

  Columns 1 through 5

   0.076394271428160   0.066448618814251   0.056223678799433                   0                   0

  Columns 6 through 10

                   0                   0                   0                   0                   0

  Columns 11 through 15

                   0                   0                   0                   0                   0

  Columns 16 through 20

                   0                   0                   0                   0                   0

  Column 21

                   0


outer_code_BER =

  Columns 1 through 5

   0.076394271428185   0.066448618815043   0.056223678823042                   0                   0

  Columns 6 through 10

                   0                   0                   0                   0                   0

  Columns 11 through 15

                   0                   0                   0                   0                   0

  Columns 16 through 20

                   0                   0                   0                   0                   0

  Column 21

                   0


inner_code_BER =

  Columns 1 through 5

   0.076394271428160   0.066448618814251   0.056223678799433   0.045858653177776                   0

  Columns 6 through 10

                   0                   0                   0                   0                   0

  Columns 11 through 15

                   0                   0                   0                   0                   0

  Columns 16 through 20

                   0                   0                   0                   0                   0

  Column 21

                   0


outer_code_BER =

  Columns 1 through 5

   0.076394271428185   0.066448618815043   0.056223678823042   0.045858653793178                   0

  Columns 6 through 10

                   0                   0                   0                   0                   0

  Columns 11 through 15

                   0                   0                   0                   0                   0

  Columns 16 through 20

                   0                   0                   0                   0                   0

  Column 21

                   0


inner_code_BER =

  Columns 1 through 5

   0.076394271428160   0.066448618814251   0.056223678799433   0.045858653177776   0.035616531888473

  Columns 6 through 10

                   0                   0                   0                   0                   0

  Columns 11 through 15

                   0                   0                   0                   0                   0

  Columns 16 through 20

                   0                   0                   0                   0                   0

  Column 21

                   0


outer_code_BER =

  Columns 1 through 5

   0.076394271428185   0.066448618815043   0.056223678823042   0.045858653793178   0.035616544432289

  Columns 6 through 10

                   0                   0                   0                   0                   0

  Columns 11 through 15

                   0                   0                   0                   0                   0

  Columns 16 through 20

                   0                   0                   0                   0                   0

  Column 21

                   0


inner_code_BER =

  Columns 1 through 5

   0.076394271428160   0.066448618814251   0.056223678799433   0.045858653177776   0.035616531888473

  Columns 6 through 10

   0.025921413525207                   0                   0                   0                   0

  Columns 11 through 15

                   0                   0                   0                   0                   0

  Columns 16 through 20

                   0                   0                   0                   0                   0

  Column 21

                   0


outer_code_BER =

  Columns 1 through 5

   0.076394271428185   0.066448618815043   0.056223678823042   0.045858653793178   0.035616544432289

  Columns 6 through 10

   0.025921576371233                   0                   0                   0                   0

  Columns 11 through 15

                   0                   0                   0                   0                   0

  Columns 16 through 20

                   0                   0                   0                   0                   0

  Column 21

                   0


inner_code_BER =

  Columns 1 through 5

   0.076394271428160   0.066448618814251   0.056223678799433   0.045858653177776   0.035616531888473

  Columns 6 through 10

   0.025921413525207   0.017016653492352                   0                   0                   0

  Columns 11 through 15

                   0                   0                   0                   0                   0

  Columns 16 through 20

                   0                   0                   0                   0                   0

  Column 21

                   0


outer_code_BER =

  Columns 1 through 5

   0.076394271428185   0.066448618815043   0.056223678823042   0.045858653793178   0.035616544432289

  Columns 6 through 10

   0.025921576371233   0.017017079826029                   0                   0                   0

  Columns 11 through 15

                   0                   0                   0                   0                   0

  Columns 16 through 20

                   0                   0                   0                   0                   0

  Column 21

                   0


inner_code_BER =

  Columns 1 through 5

   0.076394271428160   0.066448618814251   0.056223678799433   0.045858653177776   0.035616531888473

  Columns 6 through 10

   0.025921413525207   0.017016653492352   0.008259664462795                   0                   0

  Columns 11 through 15

                   0                   0                   0                   0                   0

  Columns 16 through 20

                   0                   0                   0                   0                   0

  Column 21

                   0


outer_code_BER =

  Columns 1 through 5

   0.076394271428185   0.066448618815043   0.056223678823042   0.045858653793178   0.035616544432289

  Columns 6 through 10

   0.025921576371233   0.017017079826029   0.008169157220905                   0                   0

  Columns 11 through 15

                   0                   0                   0                   0                   0

  Columns 16 through 20

                   0                   0                   0                   0                   0

  Column 21

                   0


inner_code_BER =

  Columns 1 through 5

   0.076394271428160   0.066448618814251   0.056223678799433   0.045858653177776   0.035616531888473

  Columns 6 through 10

   0.025921413525207   0.017016653492352   0.008259664462795   0.003119445474595                   0

  Columns 11 through 15

                   0                   0                   0                   0                   0

  Columns 16 through 20

                   0                   0                   0                   0                   0

  Column 21

                   0


outer_code_BER =

  Columns 1 through 5

   0.076394271428185   0.066448618815043   0.056223678823042   0.045858653793178   0.035616544432289

  Columns 6 through 10

   0.025921576371233   0.017017079826029   0.008169157220905   0.000000000283651                   0

  Columns 11 through 15

                   0                   0                   0                   0                   0

  Columns 16 through 20

                   0                   0                   0                   0                   0

  Column 21

                   0

µ±Ç°ÍâÂëÎóÂëÂÊÒÑµÍÓÚÄ¿±êÎóÂëÂÊ£¬×ÜÂëÂÊÎª0.35 dB

inner_code_BER =

  Columns 1 through 5

   0.076394271428160   0.066448618814251   0.056223678799433   0.045858653177776   0.035616531888473

  Columns 6 through 10

   0.025921413525207   0.017016653492352   0.008259664462795   0.003119445474595   0.001731678335306

  Columns 11 through 15

                   0                   0                   0                   0                   0

  Columns 16 through 20

                   0                   0                   0                   0                   0

  Column 21

                   0


inner_code_BER =

  Columns 1 through 5

   0.076394271428160   0.066448618814251   0.056223678799433   0.045858653177776   0.035616531888473

  Columns 6 through 10

   0.025921413525207   0.017016653492352   0.008259664462795   0.003119445474595   0.001731678335306

  Columns 11 through 15

   0.001113617714369                   0                   0                   0                   0

  Columns 16 through 20

                   0                   0                   0                   0                   0

  Column 21

                   0


inner_code_BER =

  Columns 1 through 5

   0.076394271428160   0.066448618814251   0.056223678799433   0.045858653177776   0.035616531888473

  Columns 6 through 10

   0.025921413525207   0.017016653492352   0.008259664462795   0.003119445474595   0.001731678335306

  Columns 11 through 15

   0.001113617714369   0.000764475061214                   0                   0                   0

  Columns 16 through 20

                   0                   0                   0                   0                   0

  Column 21

                   0


inner_code_BER =

  Columns 1 through 5

   0.076394271428160   0.066448618814251   0.056223678799433   0.045858653177776   0.035616531888473

  Columns 6 through 10

   0.025921413525207   0.017016653492352   0.008259664462795   0.003119445474595   0.001731678335306

  Columns 11 through 15

   0.001113617714369   0.000764475061214   0.000544416279819                   0                   0

  Columns 16 through 20

                   0                   0                   0                   0                   0

  Column 21

                   0


inner_code_BER =

  Columns 1 through 5

   0.076394271428160   0.066448618814251   0.056223678799433   0.045858653177776   0.035616531888473

  Columns 6 through 10

   0.025921413525207   0.017016653492352   0.008259664462795   0.003119445474595   0.001731678335306

  Columns 11 through 15

   0.001113617714369   0.000764475061214   0.000544416279819   0.000396864925134                   0

  Columns 16 through 20

                   0                   0                   0                   0                   0

  Column 21

                   0


inner_code_BER =

  Columns 1 through 5

   0.076394271428160   0.066448618814251   0.056223678799433   0.045858653177776   0.035616531888473

  Columns 6 through 10

   0.025921413525207   0.017016653492352   0.008259664462795   0.003119445474595   0.001731678335306

  Columns 11 through 15

   0.001113617714369   0.000764475061214   0.000544416279819   0.000396864925134   0.000293969278486

  Columns 16 through 20

                   0                   0                   0                   0                   0

  Column 21

                   0


inner_code_BER =

  Columns 1 through 5

   0.076394271428160   0.066448618814251   0.056223678799433   0.045858653177776   0.035616531888473

  Columns 6 through 10

   0.025921413525207   0.017016653492352   0.008259664462795   0.003119445474595   0.001731678335306

  Columns 11 through 15

   0.001113617714369   0.000764475061214   0.000544416279819   0.000396864925134   0.000293969278486

  Columns 16 through 20

   0.000220272478758                   0                   0                   0                   0

  Column 21

                   0


inner_code_BER =

  Columns 1 through 5

   0.076394271428160   0.066448618814251   0.056223678799433   0.045858653177776   0.035616531888473

  Columns 6 through 10

   0.025921413525207   0.017016653492352   0.008259664462795   0.003119445474595   0.001731678335306

  Columns 11 through 15

   0.001113617714369   0.000764475061214   0.000544416279819   0.000396864925134   0.000293969278486

  Columns 16 through 20

   0.000220272478758   0.000166467695519                   0                   0                   0

  Column 21

                   0


inner_code_BER =

  Columns 1 through 5

   0.076394271428160   0.066448618814251   0.056223678799433   0.045858653177776   0.035616531888473

  Columns 6 through 10

   0.025921413525207   0.017016653492352   0.008259664462795   0.003119445474595   0.001731678335306

  Columns 11 through 15

   0.001113617714369   0.000764475061214   0.000544416279819   0.000396864925134   0.000293969278486

  Columns 16 through 20

   0.000220272478758   0.000166467695519   0.000126629483152                   0                   0

  Column 21

                   0


inner_code_BER =

  Columns 1 through 5

   0.076394271428160   0.066448618814251   0.056223678799433   0.045858653177776   0.035616531888473

  Columns 6 through 10

   0.025921413525207   0.017016653492352   0.008259664462795   0.003119445474595   0.001731678335306

  Columns 11 through 15

   0.001113617714369   0.000764475061214   0.000544416279819   0.000396864925134   0.000293969278486

  Columns 16 through 20

   0.000220272478758   0.000166467695519   0.000126629483152   0.000096814637527                   0

  Column 21

                   0

{Undefined function or variable 'EbN0indB'.

Error in <a href="matlab:matlab.internal.language.introspective.errorDocCallback('DDE_algo_main_fixed_EsN0', 'E:\Ñ§Êõ\ÂÛÎÄ\20180914ÎÞÂëÂÊÂëË¥ÂäÐÅµÀ\³ÌÐò\Copy_of_ÀëÉ¢ÃÜ¶È½ø»¯»ñÈ¡ÃÅÏÞÖµ\DDE_algo_main_fixed_EsN0.m', 244)" style="font-weight:bold">DDE_algo_main_fixed_EsN0</a> (<a href="matlab: opentoline('E:\Ñ§Êõ\ÂÛÎÄ\20180914ÎÞÂëÂÊÂëË¥ÂäÐÅµÀ\³ÌÐò\Copy_of_ÀëÉ¢ÃÜ¶È½ø»¯»ñÈ¡ÃÅÏÞÖµ\DDE_algo_main_fixed_EsN0.m',244,0)">line 244</a>)
   fprintf('µ±Ç°ÄÚÂëÎóÂëÂÊÒÑµÍÓÚÄ¿±êÎóÂëÂÊ£¬ÐÅÔë±ÈÎª%2.2f dB\n',EbN0indB)
} 
opentoline('E:\Ñ§Êõ\ÂÛÎÄ\20180914ÎÞÂëÂÊÂëË¥ÂäÐÅµÀ\³ÌÐò\Copy_of_ÀëÉ¢ÃÜ¶È½ø»¯»ñÈ¡ÃÅÏÞÖµ\DDE_algo_main_fixed_EsN0.m',244,0)
if inner_code_BER(code_rate_index)<pe_target_innercode
   fprintf('µ±Ç°ÄÚÂëÎóÂëÂÊÒÑµÍÓÚÄ¿±êÎóÂëÂÊ£¬×ÜÂëÂÊÎª%2.2f dB\n',code_rate_vec(code_rate_index))
   break;   % Í£Ö¹µü´ú£¬ÖÕÖ¹³ÌÐò
end 
{Error: A BREAK statement appeared outside of a loop. Use RETURN instead.
} 
if inner_code_BER(code_rate_index)<pe_target_innercode
   fprintf('µ±Ç°ÄÚÂëÎóÂëÂÊÒÑµÍÓÚÄ¿±êÎóÂëÂÊ£¬×ÜÂëÂÊÎª%2.2f dB\n',code_rate_vec(code_rate_index))
   end
µ±Ç°ÄÚÂëÎóÂëÂÊÒÑµÍÓÚÄ¿±êÎóÂëÂÊ£¬×ÜÂëÂÊÎª0.26 dB
semilogy(overhead_vec(1:code_rate_index),[inner_code_BER;outer_code_BER]);grid on;
{Error using <a href="matlab:matlab.internal.language.introspective.errorDocCallback('semilogy')" style="font-weight:bold">semilogy</a>
Vectors must be the same length.
} 

diary off
