# Supplementary material for: An Efficient Design of Systematic Rateless Codes
Source: Hindawi journal article supplement (doi:10.1155/2020/8068414), 2020-05-19
Supplement: f1 [file 8068414.f1.zip › supplementary files/Matlab_code_for_Figure1/BER_by_DDE/仿真结果/Gene_fig_AWGN_omiga012_rate_1_2.m]

% 20180926 awgnÏÂomiga0,1,2·Ö²¼·ÇÏµÍ³RaptorºÍÏµÍ³RaptorÂëµÄ½¥½øÐÔÄÜ,×ÜÂëÂÊ1/2£¬ÍâÂëÂëÂÊ50/51

%%%% AWGN, dist-0-Ns
EbN0indB_vec=[-1:0.1:0.5 0.52 0.53 0.6:0.1:2];
outer_code_BER=[0.410910238283889   0.402445829810032   0.392467447109873   0.380566412018355   0.366217026897480...
                0.348767607538046   0.327468443681922   0.301582235867149   0.270634823593092   0.234787523465536...
                0.195030608898406   0.152969767365648   0.111342411184112   0.073544745190702   0.039577947849300...
                0.017111590370322   0.003117907412304   0.000000024881240   0.000000000013987                   0                   0                  0 ...
                                0                   0                   0                   0                   0 ...
                                0                   0                   0                   0                   0 ...
                                0];
semilogy(EbN0indB_vec,outer_code_BER,'k-O');

%%%% AWGN, dist-0-s
% EbN0indB_vec=[0:0.1:6];
% outer_code_BER=[0.085155667120950   0.081407055164337   0.077694174471160   0.074020929706985   0.070391314810242...
%                  0.066809437834306   0.063279557868078   0.059806133442090   0.056393879181767   0.053047823502301...
%                  0.049773354773248   0.046576237057480   0.043462570657259   0.040438670028046   0.037510836065144...
%                  0.034685015072667   0.031966363712906   0.029358772777493   0.026864431085577   0.024483520626156...
%                  0.022214118313113   0.020052344722676   0.017992763708284   0.016029018697461   0.014154704127954...
%                  0.012364511162964   0.010655706589208   0.009029768756297   0.007492794939469   0.006050102777845...
%                   0.004684917751728   0.003266985885820   0.000000364222982                   0                   0 ...
%                   zeros(1,26)];
EbN0indB_vec=[0:0.2:3.0 3.1  3.2];
outer_code_BER=[0.085155667120950     0.077694174471160      0.070391314810242...
                   0.063279557868078      0.056393879181767  ...
                 0.049773354773248     0.043462570657259     0.037510836065144...
                    0.031966363712906      0.026864431085577   ...
                 0.022214118313113     0.017992763708284     0.014154704127954...
                    0.010655706589208    0.007492794939469   ...
                  0.004684917751728    0.003266985885820   0.000000364222982                
                  ];
hold on;semilogy(EbN0indB_vec,outer_code_BER,'k--O');

%%%% AWGN, dist-1-Ns
EbN0indB_vec=[0:0.1:0.4  0.403 0.5];
outer_code_BER=[0.317697154702807   0.274317843817639   0.196672763889303   0.083178254457419   0.002425997855228...
                0.000000005290888   0.000000001698956  ];
hold on;semilogy(EbN0indB_vec,outer_code_BER,'k-s');


%%%% AWGN, dist-1-s
% EbN0indB_vec=[0:0.1:6];
% outer_code_BER=[0.085397029963518   0.081516509511760   0.077666073748954   0.073851383502990   0.070078629585699...
%                 0.066354498014021   0.062686082311361   0.059080731355427   0.055545827275249   0.052088498155023...
%                 0.048715283770194   0.045431786582278   0.042242350949778   0.039149817585280   0.036155396729176...
%                 0.033258695152937   0.030457925523071   0.027750330632856   0.025132878068968   0.022603326835386...
%                 0.020161822098975   0.017813165018055   0.015569613466296   0.013453084093022   0.011493847329783...
%                 0.009722206259859   0.008154394857859   0.006781781592663   0.005570235260828   0.004461384160295...
%                  0.003334792806946   0.000000000033768                   0                   0                   0 ...
%                  zeros(1,26)];
EbN0indB_vec=[0:0.2:3 3.06 3.07 3.1];
outer_code_BER=[0.085397029963518      0.077666073748954      0.070078629585699...
                0.062686082311361      0.055545827275249   ...
                0.048715283770194      0.042242350949778      0.036155396729176...
                   0.030457925523071      0.025132878068968  ...
                0.020161822098975      0.015569613466296    0.011493847329783...
                   0.008154394857859     0.005570235260828   ...
                 0.003334792806946  0.002226451703182   0.000000000331392    0.000000000033768               ];
hold on;semilogy(EbN0indB_vec,outer_code_BER,'k--s');

%%%% AWGN, dist-2-Ns
% EbN0indB_vec=[0:0.1:6];
% outer_code_BER=[0.489820688674564   0.489549705525477   0.489268858097169   0.488977688247135   0.488675712582702...
%                 0.488362420898951   0.488037274512748   0.487699704485607   0.487349109727698   0.486984854974612...
%                 0.486606268627969   0.486212640450258   0.485803219103448   0.485377209520253   0.484933770095926...
%                 0.484472009687414   0.483990984405785   0.483489694186365   0.482967079119922   0.482422015526536...
%                 0.481853311752198   0.481259703666382   0.480639849836701   0.479992326354637   0.479315621283799...
%                 0.478608128699701   0.477868142287170   0.477093848458857   0.476283318955404   0.475434502885383...
%                 0.474545218161073   0.473613142284907   0.472635802441797   0.471610564855057   0.470534623369670...
%                  0.469404987237633   0.468218468098278   0.466971666175214   0.465660955754068   0.464282470068608...
%                  0.462832085812780   0.461305407624856   0.459697753068056   0.458004138879409   0.456219269595148...
%                  0.454337530115074   0.452352984373670   0.450259383078563   0.448050184498919   0.445718593569514...
%                   0.443257626136169   0.440660206973818   0.437919312142166   0.435028168038292   0.431980520654407...
%                   0.428770988205057   0.425395507176334   0.421851874281625   0.418140372931813   0.414264451317058...
%                   0.410231390526724];
EbN0indB_vec=[0:0.5:6];
outer_code_BER=[0.489820688674564   ...
                0.488362420898951  ...
                0.486606268627969   ...
                0.484472009687414   ...
                0.481853311752198   ...
                0.478608128699701  ...
                0.474545218161073   ...
                 0.469404987237633   ...
                 0.462832085812780   ...
                 0.454337530115074   ...
                  0.443257626136169   ...
                  0.428770988205057  ...
                  0.410231390526724];
hold on;semilogy(EbN0indB_vec,outer_code_BER,'k-^');

%%%% AWGN, dist-2-s
% EbN0indB_vec=[0:0.1:6];
% outer_code_BER=[0.118492843895792   0.114000763721911   0.109287355258006   0.104291214076054   0.098919492187315...
%                 0.093020229839778   0.086312971825386   0.078160545136524   0.066191744495331   0.000000000033125...
%                  zeros(1,51)];
EbN0indB_vec=[0:0.2:0.8   0.85:0.01:0.86 0.88 0.89        0.9];
outer_code_BER=[0.118492843895792      0.109287355258006      0.098919492187315...
                   0.086312971825386     0.066191744495331      0.036903422605783      0.006974122116862      0.002599212738202   0.000000000349157                   0.000000000033125...
                 ];
hold on;semilogy(EbN0indB_vec,outer_code_BER,'k--^');


%%%%%% AWGN ÏÂ1/2ÂëÂÊµÄÏãÅ©¼«ÏÞ 
% hold on;semilogy(repmat(0.19,2,1),repmat([1e-6 1e-3  ]',1,4),'k');
hold on; plot([0.19 0.19],[1e-6 1e-3],'k')
legend('NR with \Omega_B_E_C','SR with \Omega_B_E_C','NR with \Omega_A_W_G_N_-_N','SR with \Omega_A_W_G_N_-_N',...
       'NR with \Omega_A_W_G_N_-_S','SR with \Omega_A_W_G_N_-_S','Shannon limit');

%%%%%%%%%%%%%%%%%%%%%%%%%%%%%%
axis([0 6 1e-6 1]);
xlabel('E_b/N_0(dB)');
ylabel('BER');
grid on;
