# Supplementary material for: An Efficient Design of Systematic Rateless Codes
Source: Hindawi journal article supplement (doi:10.1155/2020/8068414), 2020-05-19
Supplement: f1 [file 8068414.f1.zip › supplementary files/Matlab_code_for_Figure1/BER_by_DDE/仿真结果/Gene_fig_Rayleigh_omiga012_rate_1_2.m]

% 20180926 rayleighÏÂomiga0,1,2·Ö²¼·ÇÏµÍ³RaptorºÍÏµÍ³RaptorÂëµÄ½¥0.379469900484071   0.366879750449459   0.351845805786628   0.333722159625865   0.311728699399703½øÐÔÄÜ,×ÜÂëÂÊ1/2£¬ÍâÂëÂëÂÊ50/51
%%%% Rayleigh, dist-0-Ns
% EbN0indB_vec=[0:0.1:6];
% outer_code_BER=[0.442059265299198   0.438495140517214   0.434577689968611   0.430249752007699   0.425440710275914 ...
%                 0.420062485950892   0.414004155827468   0.407124705156027   0.399243281233112   0.390126191111211 ...
%                 0.379469900484071   0.366879750449459   0.351845805786628   0.333722159625865   0.311728699399703 ...
%                 0.285021607039338   0.252907304976643   0.215181564501606   0.172271173268218   0.125744433505889 ...
%                 0.080379797876579   0.036451132867660   0.000000074403558                   0                   0 ...
%                 zeros(1,36)];
EbN0indB_vec=[0:0.2:2 2.1  2.15  2.18 2.19  2.2];
outer_code_BER=[0.442059265299198      0.434577689968611      0.425440710275914 ...
                 0.414004155827468      0.399243281233112    ...
                0.379469900484071      0.351845805786628      0.311728699399703 ...
                   0.252907304976643    0.172271173268218    ...
                0.080379797876579   0.036451132867660   0.021755864061947    0.010057408315132   0.000000010527497  0.000000074403558              
                ];     
semilogy(EbN0indB_vec,outer_code_BER,'k-O');

%%%% Rayleigh, dist-0-Ns
% EbN0indB_vec=[0:0.1:6];
% outer_code_BER=[0.141500879323390   0.138175148203252   0.134853729924419   0.131538204629458   0.128230195980865 ...
%                 0.124931368648882   0.121643425202650   0.118368102385146   0.115107166774749   0.111862409864376 ...
%                 0.108635642622937   0.105428689642400   0.102243383016213   0.099081556139249   0.095945037663722 ...
%                 0.092835645886779   0.089755183880391   0.086705435699124   0.083688164011980   0.080705109496172...
%                 0.077757992298172   0.074848515804228   0.071978372861988   0.069149254447863   0.066362860572328 ...
%                 0.063620912947592   0.060925168601948   0.058277433211614   0.055679572447018   0.053133519130552 ...
%                 0.050641273545164   0.048204893925462   0.045826474153937   0.043508106146153   0.041251825494136 ...
%                 0.039059540716975   0.036932948851265   0.034873442791226   0.032882018237401   0.030959189702521 ...
%                 0.029104925210620   0.027318607877193   0.025599029694217   0.023944419214671   0.022352501321462 ...
%                 0.020820584712800   0.019345671699460   0.017924585588780   0.016554113231756   0.015231163937115 ...
%                 0.013952950258553   0.012717199216756   0.011522398567352   0.010368057142002   0.009254882431639 ...
%                 0.008184618137084   0.007159045383979   0.006177414323091   0.005231110354095   0.004290589436586 ...
%                 0.003235571972020];
EbN0indB_vec=[0:0.5:6];
outer_code_BER=[0.141500879323390    ...
                0.124931368648882    ...
                0.108635642622937    ...
                0.092835645886779   ...
                0.077757992298172    ...
                0.063620912947592    ...
                0.050641273545164    ...
                0.039059540716975    ...
                0.029104925210620    ...
                0.020820584712800    ...
                0.013952950258553    ...
                0.008184618137084    ...
                0.003235571972020];
hold on;semilogy(EbN0indB_vec,outer_code_BER,'k--O');

%%%% Rayleigh, dist-1-Ns
% EbN0indB_vec=[0:0.1:6];
% outer_code_BER=[0.453077185414538   0.450784504721612   0.448323653110363   0.445675208332342   0.442816225411191...
%                 0.439719329734278   0.436351504531018   0.432672442603720   0.428632263229845   0.424168281132740 ...
%                 0.419200319116889   0.413623707462851   0.407298460396732   0.400031823567833   0.391548619654290 ...
%                 0.381437352772370   0.369043036459109   0.353225512835678   0.331703980249815   0.298706053320046 ...
%                 0.233060591019575   0.074620824162200   0.000000000612084                   0                   0 ...
%                 zeros(1,36)];
EbN0indB_vec=[0:0.2:2 2.1  2.13  2.19 2.2];
outer_code_BER=[0.453077185414538     0.448323653110363    0.442816225411191...
                 0.436351504531018      0.428632263229845   ...
                0.419200319116889     0.407298460396732      0.391548619654290 ...
                   0.369043036459109      0.331703980249815   ...
                0.233060591019575   0.074620824162200      0.011658262989458    0.002642832078980  0.000000000612084          ];
semilogy(EbN0indB_vec,outer_code_BER,'k-s');

%%%% Rayleigh, dist-1-s
% EbN0indB_vec=[0:0.1:6];
% outer_code_BER=[0.142920850967060   0.139557912044244   0.136195893375297   0.132836108354312   0.129479898919441 ...
%                 0.126128637696935   0.122783731089354   0.119446623430791   0.116118802320110   0.112801805221793 ...
%                 0.109497227389951   0.106206731120209   0.102932056262170   0.099675031826544   0.096437588390384 ...
%                 0.093221770836683   0.090029750757913   0.086863837608875   0.083726487420960   0.080620307606942 ...
%                 0.077548056126028   0.074512633092790   0.071517062866481   0.068564464825406   0.065658011488897 ...
%                 0.062800873449367   0.059996151723357   0.057246799555239   0.054555537255540   0.051924765095316 ...
%                 0.049356480338446   0.046852204933008   0.044412930064614   0.042039082728552   0.039730517919398 ...
%                 0.037486538334041   0.035305942081704   0.033187098225614   0.031128050394660   0.029126650420215 ...
%                 0.027180727025690   0.025288298795384   0.023447845130249   0.021658651396381   0.019921239745493 ...
%                 0.018237874710298   0.016613076172050   0.015053966599896   0.013570140223174   0.012172669392106 ...
%                 0.010872056810709   0.009675518338855   0.008584621056892   0.007594303446781   0.006693422338828 ...
%                 0.005865884540387   0.005090723630553   0.004338076923121   0.003546969474342   0.000000183780011 0];
EbN0indB_vec=[0:0.5:5.5 5.8 5.9];
outer_code_BER=[0.142920850967060    ...
                0.126128637696935   ...
                0.109497227389951    ...
                0.093221770836683    ...
                0.077548056126028    ...
                0.062800873449367    ...
                0.049356480338446   ...
                0.037486538334041    ...
                0.027180727025690    ...
                0.018237874710298    ...
                0.010872056810709    ...
                0.005865884540387     0.003546969474342   0.000000183780011 ];

semilogy(EbN0indB_vec,outer_code_BER,'k--s');

%%%% Rayleigh, dist-2-Ns
EbN0indB_vec=[0:0.5:6];
outer_code_BER=[0.493564391990779    ...
                0.492934607098729   ...
                0.492232569013686    ...
                0.491449103161025    ...
                0.490573845285290    ...
                0.489595101408318    ...
                0.488499697364629   ...
                0.487272818912314   ...
                0.485897843845249    ...
                0.484356167863639    ...
                0.482627026103551   ...
                0.480687312145141   ...
                0.478511396185261];
semilogy(EbN0indB_vec,outer_code_BER,'k-^');

%%%% Rayleigh, dist-2-s
% EbN0indB_vec=[0:0.1:6];
% outer_code_BER=[0.178618472275942   0.175756771893938   0.172874503078912   0.169970190484946   0.167042151571197 ...
%                 0.164088466907412   0.161106944448430   0.158095076167206   0.155049984911914   0.151968358622768 ...
%                 0.148846368010973   0.145679562314756   0.142462735565476   0.139189752529022   0.135853318478615 ...
%                 0.132444669074878   0.128953143859587   0.125365585468748   0.121665469378017   0.117831600977850 ...
%                  0.113836085829665   0.109641009809692   0.105192666024702   0.100410683283289   0.095165209985802 ...
%                  0.089220842707395   0.082058217956275   0.071883591191908   0.000000023629308                   0 ...
%                  zeros(1,31)];
EbN0indB_vec=[0:0.2:2.6 2.7 2.76  2.79 2.8 ];
outer_code_BER=[0.178618472275942      0.172874503078912      0.167042151571197 ...
                   0.161106944448430     0.155049984911914    ...
                0.148846368010973      0.142462735565476      0.135853318478615 ...
                 0.128953143859587      0.121665469378017    ...
                 0.113836085829665      0.105192666024702      0.095165209985802 ...
                    0.082058217956275   0.071883591191908  0.005572311124568   0.002358227710523 0.000000023629308             ];
semilogy(EbN0indB_vec,outer_code_BER,'k--^');

%%%%%% Rayleigh-1/2ÂëÂÊµÄÏãÅ©¼«ÏÞ 
% hold on;semilogy(repmat(1.83,2,1),repmat([1e-6 1e-3  ]',1,4),'k');
hold on; plot([1.83 1.83],[1e-6 1e-3],'k')
legend('NR with \Omega_B_E_C','SR with \Omega_B_E_C','NR with \Omega_A_W_G_N_-_N','SR with \Omega_A_W_G_N_-_N',...
       'NR with \Omega_A_W_G_N_-_S','SR with \Omega_A_W_G_N_-_S','Shannon limit');
%%%%%%%%%%%%%%%%%%%%%%%%%%%%%%
axis([0 6 1e-6 1]);
xlabel('E_b/N_0(dB)');
ylabel('BER');
grid on;
