# Supplementary material for: An Efficient Design of Systematic Rateless Codes
Source: Hindawi journal article supplement (doi:10.1155/2020/8068414), 2020-05-19
Supplement: f1 [file 8068414.f1.zip › supplementary files/Matlab_code_for_Figure1/BER_by_DDE/仿真结果/Gene_fig_Rician_omiga012_rate_1_2.m]

% 20180926 ricianÏÂomiga0,1,2·Ö²¼·ÇÏµÍ³RaptorºÍÏµÍ³RaptorÂëµÄ½¥0.379469900484071   0.366879750449459   0.351845805786628   0.333722159625865   0.311728699399703½øÐÔÄÜ,×ÜÂëÂÊ1/2£¬ÍâÂëÂëÂÊ50/51
%%%% rician, dist-0-Ns
% EbN0indB_vec=[0:0.1:2];
% outer_code_BER=[ 0.407985073568425   0.399737729863268   0.390114763784327   0.378761879879940   0.365218364306548 ...
%                  0.348894728641558   0.329063753685713   0.304898306775474   0.275620579415851   0.240826173423957 ...
%                  0.200827196941286   0.156666002635738   0.111096789616068   0.068511022311587   0.030292074410766 ...
%                   0.000000790385397                   0                   0                   0                   0 0];
EbN0indB_vec=[0:0.2:1.4      1.45  1.47 1.49   1.5];
outer_code_BER=[ 0.407985073568425      0.390114763784327     0.365218364306548 ...
                    0.329063753685713      0.275620579415851    ...
                 0.200827196941286      0.111096789616068      0.030292074410766 ...
                 0.017860255036914   0.005430941599732 0.002519853779240    0.000000790385397        ];
semilogy(EbN0indB_vec,outer_code_BER,'k-O');

%%%% rician, dist-0-s
% EbN0indB_vec=[0:0.1:6];
% outer_code_BER=[0.119815235522946   0.116294245155329   0.112786006101737   0.109292813109344   0.105817019851914 ...
%                 0.102361006903492   0.098927188207309   0.095517993886343   0.092135879503793   0.088783293126820 ...
%                 0.085462684979897   0.082176494184811   0.078927167653618   0.075717134039974   0.072548822976575 ...
%                 0.069424690999258   0.066347209963525   0.063318898346231   0.060342359079913   0.057420275171911 ...
%                 0.054555441876930   0.051750796927267   0.049009391617475   0.046334383832559   0.043729010602171 ...
%                 0.041196477587153   0.038739859803037   0.036361976304863   0.034065187694260   0.031851237563249 ...
%                 0.029721113844877   0.027674891784086   0.025711685883192   0.023829676000663   0.022026138744422 ...
%                 0.020297638787860   0.018640176547894   0.017049475142249   0.015521239248738   0.014051494617325 ...
%                 0.012636977476231   0.011275633676128   0.009967083506730   0.008712976113299   0.007516336190290 ...
%                  0.006378680420874   0.005292599886329   0.004222710008456   0.003004725988597   0.000259757170731 ...
%                  0.000000929157107 zeros(1,10)
%  ];
EbN0indB_vec=[0:0.5:4.5     4.8 4.9 5.0];
outer_code_BER=[0.119815235522946    ...
                0.102361006903492    ...
                0.085462684979897    ...
                0.069424690999258  ...
                0.054555441876930    ...
                0.041196477587153    ...
                0.029721113844877    ...
                0.020297638787860    ...
                0.012636977476231    ...
                 0.006378680420874        0.003004725988597   0.000259757170731 ...
                 0.000000929157107
 ];
hold on;semilogy(EbN0indB_vec,outer_code_BER,'k--O');

%%%% rician, dist-1-Ns
% EbN0indB_vec=[0:0.1:6];
% outer_code_BER=[0.432228119530796   0.427892439086941   0.423063345443880   0.417639170565290   0.411484513831639 ...
%                 0.404414062734854   0.396165589463048   0.386352217005019   0.374371067284993   0.359208823654879 ...
%                 0.338957885705395   0.309292452373044   0.256880774514600   0.143070975843611   0.000000021697117 ...
%                 zeros(1,46)];
EbN0indB_vec=[0:0.2:1.2 1.3 1.35   1.37  1.38 1.39     1.4];
outer_code_BER=[0.432228119530796      0.423063345443880      0.411484513831639 ...
                  0.396165589463048     0.374371067284993   ...
                0.338957885705395      0.256880774514600   0.143070975843611 ...
                   0.047986346174537   0.016015188677993   0.002827122018805   0.000000635008505 0.000000021697117 ...
               ];
hold on;semilogy(EbN0indB_vec,outer_code_BER,'k-s');

%%%% rician, dist-1-s
% EbN0indB_vec=[0:0.1:6];
% outer_code_BER=[0.120918740878550   0.117333100156390   0.113754271868533   0.110184228504477   0.106625029022010 ...
%                 0.103078846910974   0.099548002978233   0.096034959550922   0.092542353197978   0.089073031956679 ...
%                 0.085630049437032   0.082216693243585   0.078836513027409   0.075493293060842   0.072191051870185 ...
%                 0.068934031073433   0.065726605684831   0.062573247808524   0.059478392142404   0.056446322617231 ...
%                 0.053481047698697   0.050586119051861   0.047764498489414   0.045018448672097   0.042349403885782 ...
%                 0.039757931033612   0.037243748895336   0.034805739127685   0.032442106740395   0.030150505347679 ...
%                 0.027928321133248   0.025772970807092   0.023682340155398   0.021655360302959   0.019692763129732 ...
%                 0.017798002407345   0.015978243102014   0.014244912445416   0.012613164352109   0.011099314151127 ...
%                 0.009716278559484   0.008468652088098   0.007350190835552   0.006344338113564   0.005426049386072 ...
%                 0.004560318007727   0.003684816005292   0.002580911864822   0.000188996633563   0.000000030188179 ...
%                 zeros(1,11)];
EbN0indB_vec=[0:0.5:4.5 4.7:0.1:4.9];
outer_code_BER=[0.120918740878550   ...
                0.103078846910974    ...
                0.085630049437032    ...
                0.068934031073433    ...
                0.053481047698697   ...
                0.039757931033612   ...
                0.027928321133248    ...
                0.017798002407345    ...
                0.009716278559484    ...
                0.004560318007727      0.002580911864822   0.000188996633563   0.000000030188179 ...
                ];
hold on;semilogy(EbN0indB_vec,outer_code_BER,'k--s');

%%%% rician, dist-2-Ns
% EbN0indB_vec=[0:0.1:6];
% outer_code_BER=[0.492463721036860   0.492305624090013   0.492143457779253   0.491977111159506   0.491806455326686 ...
%                 0.491631355105376   0.491451689459979   0.491267310275441   0.491078087177335   0.490883863949625 ...
%                  0.490684500711713   0.490479832319609   0.490269709146856   0.490053956316298   0.489832414170086 ...
%                  0.489604897293525   0.489371235687385   0.489131232579402   0.488884707313696   0.488631450910233 ...
%                  0.488371271754828   0.488103947765040   0.487829269759323   0.487547020622245   0.487256959830829 ...
%                  0.486958864163207   0.486652477751795   0.486337558131008   0.486013854935942   0.485681090369794 ...
%                  0.485339000094631   0.484987304841678   0.484625724147834   0.484253949469714   0.483871684942484 ...
%                  0.483478619362372   0.483074433194506   0.482658798436795   0.482231385391801   0.481791834768734...
%                   0.481339799502567   0.480874916430820   0.480396813301899   0.479905108663208   0.479399411754299 ...
%                   0.478879322405478   0.478344430942168   0.477794310461097   0.477228546907054   0.476646694255508 ...
%                   0.476048303985157   0.475432917699196   0.474800058963451   0.474149265027634   0.473480040130476 ...
%                   0.472791877571248   0.472084285156739   0.471356728635810   0.470608695876491   0.469839632804284 ...
%                   0.469049008353853];
 EbN0indB_vec=[0:0.5:6];
outer_code_BER=[0.492463721036860   ...
                0.491631355105376    ...
                 0.490684500711713    ...
                 0.489604897293525    ...
                 0.488371271754828   ...
                 0.486958864163207  ...
                 0.485339000094631    ...
                 0.483478619362372   ...
                  0.481339799502567    ...
                  0.478879322405478    ...
                  0.476048303985157    ...
                  0.472791877571248  ...
                  0.469049008353853];             
hold on;semilogy(EbN0indB_vec,outer_code_BER,'k-^');

%%%% rician, dist-2-s
% EbN0indB_vec=[0:0.1:6];
% outer_code_BER=[0.157478573366636   0.154232388246953   0.150943708560079   0.147607967998057   0.144219784017228 ...
%                 0.140772792911425   0.137259379849709   0.133670366942019   0.129994539995993   0.126218002680909 ...
%                 0.122323232207890   0.118287659788950   0.114081442314907   0.109663818579070   0.104976680430415 ...
%                 0.099932398474753   0.094387848566439   0.088079331165393   0.080407748267558   0.069119154541600 ...
%                  0.000000001335295  zeros(1,40)];
EbN0indB_vec=[0:0.2:1.8 1.9          1.95       1.99        2.0];
outer_code_BER=[0.157478573366636      0.150943708560079      0.144219784017228 ...
                   0.137259379849709     0.129994539995993    ...
                0.122323232207890      0.114081442314907     0.104976680430415 ...
                 0.094387848566439      0.080407748267558   0.069119154541600    ...
                 0.010015057012285     0.002617096234229                 0.000000001335295 ];
hold on;semilogy(EbN0indB_vec,outer_code_BER,'k--^');

%%%%%% rician ÏÂ1/2ÂëÂÊµÄÏãÅ©¼«ÏÞ 
% hold on;semilogy(repmat(1.1,2,1),repmat([1e-6 1e-3  ]',1,4),'k');
hold on; plot([1.1 1.1],[1e-6 1e-3],'k')
legend('NR with \Omega_B_E_C','SR with \Omega_B_E_C','NR with \Omega_A_W_G_N_-_N','SR with \Omega_A_W_G_N_-_N',...
       'NR with \Omega_A_W_G_N_-_S','SR with \Omega_A_W_G_N_-_S','Shannon limit');
%%%%%%%%%%%%%%%%%%%%%%%%%%%%%%
axis([0 6 1e-6 1]);
xlabel('E_b/N_0(dB)');
ylabel('BER');
grid on;
