# Supplementary material for: An Efficient Design of Systematic Rateless Codes
Source: Hindawi journal article supplement (doi:10.1155/2020/8068414), 2020-05-19
Supplement: f1 [file 8068414.f1.zip › supplementary files/Matlab_code_for_Figure1/BER_by_DDE/仿真结果/低码率/BER_by_DDE_rician_rate_1_6_098_dist0_Ns.txt]

µ±Ç°ÐÅµÀÎªÀµË¹ÐÅµÀ£¬²ÎÊýgamma=2

EbN0indB_vec =

  Columns 1 through 5

  -2.000000000000000  -1.900000000000000  -1.800000000000000  -1.700000000000000  -1.600000000000000

  Columns 6 through 10

  -1.500000000000000  -1.400000000000000  -1.300000000000000  -1.200000000000000  -1.100000000000000

  Columns 11 through 15

  -1.000000000000000  -0.900000000000000  -0.800000000000000  -0.700000000000000  -0.600000000000000

  Columns 16 through 20

  -0.500000000000000  -0.400000000000000  -0.300000000000000  -0.200000000000000  -0.100000000000000

  Column 21

                   0

ÖÆ±í³É¹¦
µ±Ç°Ñ¡ÔñRaptorÂë
µ±Ç°Ñ¡Ôñ·ÇÏµÍ³Âë
×ÜÂëÂÊ=0.16667, ÍâÂëÂëÂÊ=0.98000, ÄÚÂëÂëÂÊ=0.17007

out_node_index =

     1     2     3     4     5     8     9    19    65    66


ans =

  Columns 1 through 5

   0.007969000000000   0.493570000000000   0.166220000000000   0.072646000000000   0.082558000000000

  Columns 6 through 10

   0.056058000000000   0.037229000000000   0.055590000000000   0.025023000000000   0.003135000000000


inner_code_BER =

  Columns 1 through 5

   0.381295657742848                   0                   0                   0                   0

  Columns 6 through 10

                   0                   0                   0                   0                   0

  Columns 11 through 15

                   0                   0                   0                   0                   0

  Columns 16 through 20

                   0                   0                   0                   0                   0

  Column 21

                   0


outer_code_BER =

  Columns 1 through 5

   0.381295657742850                   0                   0                   0                   0

  Columns 6 through 10

                   0                   0                   0                   0                   0

  Columns 11 through 15

                   0                   0                   0                   0                   0

  Columns 16 through 20

                   0                   0                   0                   0                   0

  Column 21

                   0


inner_code_BER =

  Columns 1 through 5

   0.381295657742848   0.368069318813704                   0                   0                   0

  Columns 6 through 10

                   0                   0                   0                   0                   0

  Columns 11 through 15

                   0                   0                   0                   0                   0

  Columns 16 through 20

                   0                   0                   0                   0                   0

  Column 21

                   0


outer_code_BER =

  Columns 1 through 5

   0.381295657742850   0.368069318813703                   0                   0                   0

  Columns 6 through 10

                   0                   0                   0                   0                   0

  Columns 11 through 15

                   0                   0                   0                   0                   0

  Columns 16 through 20

                   0                   0                   0                   0                   0

  Column 21

                   0


inner_code_BER =

  Columns 1 through 5

   0.381295657742848   0.368069318813704   0.352331674107925                   0                   0

  Columns 6 through 10

                   0                   0                   0                   0                   0

  Columns 11 through 15

                   0                   0                   0                   0                   0

  Columns 16 through 20

                   0                   0                   0                   0                   0

  Column 21

                   0


outer_code_BER =

  Columns 1 through 5

   0.381295657742850   0.368069318813703   0.352331674107926                   0                   0

  Columns 6 through 10

                   0                   0                   0                   0                   0

  Columns 11 through 15

                   0                   0                   0                   0                   0

  Columns 16 through 20

                   0                   0                   0                   0                   0

  Column 21

                   0


inner_code_BER =

  Columns 1 through 5

   0.381295657742848   0.368069318813704   0.352331674107925   0.333782251830442                   0

  Columns 6 through 10

                   0                   0                   0                   0                   0

  Columns 11 through 15

                   0                   0                   0                   0                   0

  Columns 16 through 20

                   0                   0                   0                   0                   0

  Column 21

                   0


outer_code_BER =

  Columns 1 through 5

   0.381295657742850   0.368069318813703   0.352331674107926   0.333782251830443                   0

  Columns 6 through 10

                   0                   0                   0                   0                   0

  Columns 11 through 15

                   0                   0                   0                   0                   0

  Columns 16 through 20

                   0                   0                   0                   0                   0

  Column 21

                   0


inner_code_BER =

  Columns 1 through 5

   0.381295657742848   0.368069318813704   0.352331674107925   0.333782251830442   0.312307692058413

  Columns 6 through 10

                   0                   0                   0                   0                   0

  Columns 11 through 15

                   0                   0                   0                   0                   0

  Columns 16 through 20

                   0                   0                   0                   0                   0

  Column 21

                   0


outer_code_BER =

  Columns 1 through 5

   0.381295657742850   0.368069318813703   0.352331674107926   0.333782251830443   0.312307692058414

  Columns 6 through 10

                   0                   0                   0                   0                   0

  Columns 11 through 15

                   0                   0                   0                   0                   0

  Columns 16 through 20

                   0                   0                   0                   0                   0

  Column 21

                   0


inner_code_BER =

  Columns 1 through 5

   0.381295657742848   0.368069318813704   0.352331674107925   0.333782251830442   0.312307692058413

  Columns 6 through 10

   0.288062533024987                   0                   0                   0                   0

  Columns 11 through 15

                   0                   0                   0                   0                   0

  Columns 16 through 20

                   0                   0                   0                   0                   0

  Column 21

                   0


outer_code_BER =

  Columns 1 through 5

   0.381295657742850   0.368069318813703   0.352331674107926   0.333782251830443   0.312307692058414

  Columns 6 through 10

   0.288062533024987                   0                   0                   0                   0

  Columns 11 through 15

                   0                   0                   0                   0                   0

  Columns 16 through 20

                   0                   0                   0                   0                   0

  Column 21

                   0


inner_code_BER =

  Columns 1 through 5

   0.381295657742848   0.368069318813704   0.352331674107925   0.333782251830442   0.312307692058413

  Columns 6 through 10

   0.288062533024987   0.261478882800364                   0                   0                   0

  Columns 11 through 15

                   0                   0                   0                   0                   0

  Columns 16 through 20

                   0                   0                   0                   0                   0

  Column 21

                   0


outer_code_BER =

  Columns 1 through 5

   0.381295657742850   0.368069318813703   0.352331674107926   0.333782251830443   0.312307692058414

  Columns 6 through 10

   0.288062533024987   0.261478882800363                   0                   0                   0

  Columns 11 through 15

                   0                   0                   0                   0                   0

  Columns 16 through 20

                   0                   0                   0                   0                   0

  Column 21

                   0


inner_code_BER =

  Columns 1 through 5

   0.381295657742848   0.368069318813704   0.352331674107925   0.333782251830442   0.312307692058413

  Columns 6 through 10

   0.288062533024987   0.261478882800364   0.233196144387931                   0                   0

  Columns 11 through 15

                   0                   0                   0                   0                   0

  Columns 16 through 20

                   0                   0                   0                   0                   0

  Column 21

                   0


outer_code_BER =

  Columns 1 through 5

   0.381295657742850   0.368069318813703   0.352331674107926   0.333782251830443   0.312307692058414

  Columns 6 through 10

   0.288062533024987   0.261478882800363   0.233196144387931                   0                   0

  Columns 11 through 15

                   0                   0                   0                   0                   0

  Columns 16 through 20

                   0                   0                   0                   0                   0

  Column 21

                   0


inner_code_BER =

  Columns 1 through 5

   0.381295657742848   0.368069318813704   0.352331674107925   0.333782251830442   0.312307692058413

  Columns 6 through 10

   0.288062533024987   0.261478882800364   0.233196144387931   0.203933981053370                   0

  Columns 11 through 15

                   0                   0                   0                   0                   0

  Columns 16 through 20

                   0                   0                   0                   0                   0

  Column 21

                   0


outer_code_BER =

  Columns 1 through 5

   0.381295657742850   0.368069318813703   0.352331674107926   0.333782251830443   0.312307692058414

  Columns 6 through 10

   0.288062533024987   0.261478882800363   0.233196144387931   0.203933981053371                   0

  Columns 11 through 15

                   0                   0                   0                   0                   0

  Columns 16 through 20

                   0                   0                   0                   0                   0

  Column 21

                   0


inner_code_BER =

  Columns 1 through 5

   0.381295657742848   0.368069318813704   0.352331674107925   0.333782251830442   0.312307692058413

  Columns 6 through 10

   0.288062533024987   0.261478882800364   0.233196144387931   0.203933981053370   0.174365676467823

  Columns 11 through 15

                   0                   0                   0                   0                   0

  Columns 16 through 20

                   0                   0                   0                   0                   0

  Column 21

                   0


outer_code_BER =

  Columns 1 through 5

   0.381295657742850   0.368069318813703   0.352331674107926   0.333782251830443   0.312307692058414

  Columns 6 through 10

   0.288062533024987   0.261478882800363   0.233196144387931   0.203933981053371   0.174365676467822

  Columns 11 through 15

                   0                   0                   0                   0                   0

  Columns 16 through 20

                   0                   0                   0                   0                   0

  Column 21

                   0


inner_code_BER =

  Columns 1 through 5

   0.381295657742848   0.368069318813704   0.352331674107925   0.333782251830442   0.312307692058413

  Columns 6 through 10

   0.288062533024987   0.261478882800364   0.233196144387931   0.203933981053370   0.174365676467823

  Columns 11 through 15

   0.145115983853490                   0                   0                   0                   0

  Columns 16 through 20

                   0                   0                   0                   0                   0

  Column 21

                   0


outer_code_BER =

  Columns 1 through 5

   0.381295657742850   0.368069318813703   0.352331674107926   0.333782251830443   0.312307692058414

  Columns 6 through 10

   0.288062533024987   0.261478882800363   0.233196144387931   0.203933981053371   0.174365676467822

  Columns 11 through 15

   0.145115983853490                   0                   0                   0                   0

  Columns 16 through 20

                   0                   0                   0                   0                   0

  Column 21

                   0


inner_code_BER =

  Columns 1 through 5

   0.381295657742848   0.368069318813704   0.352331674107925   0.333782251830442   0.312307692058413

  Columns 6 through 10

   0.288062533024987   0.261478882800364   0.233196144387931   0.203933981053370   0.174365676467823

  Columns 11 through 15

   0.145115983853490   0.116944463067797                   0                   0                   0

  Columns 16 through 20

                   0                   0                   0                   0                   0

  Column 21

                   0


outer_code_BER =

  Columns 1 through 5

   0.381295657742850   0.368069318813703   0.352331674107926   0.333782251830443   0.312307692058414

  Columns 6 through 10

   0.288062533024987   0.261478882800363   0.233196144387931   0.203933981053371   0.174365676467822

  Columns 11 through 15

   0.145115983853490   0.116944463067797                   0                   0                   0

  Columns 16 through 20

                   0                   0                   0                   0                   0

  Column 21

                   0


inner_code_BER =

  Columns 1 through 5

   0.381295657742848   0.368069318813704   0.352331674107925   0.333782251830442   0.312307692058413

  Columns 6 through 10

   0.288062533024987   0.261478882800364   0.233196144387931   0.203933981053370   0.174365676467823

  Columns 11 through 15

   0.145115983853490   0.116944463067797   0.090722094556870                   0                   0

  Columns 16 through 20

                   0                   0                   0                   0                   0

  Column 21

                   0


outer_code_BER =

  Columns 1 through 5

   0.381295657742850   0.368069318813703   0.352331674107926   0.333782251830443   0.312307692058414

  Columns 6 through 10

   0.288062533024987   0.261478882800363   0.233196144387931   0.203933981053371   0.174365676467822

  Columns 11 through 15

   0.145115983853490   0.116944463067797   0.090722094556870                   0                   0

  Columns 16 through 20

                   0                   0                   0                   0                   0

  Column 21

                   0


inner_code_BER =

  Columns 1 through 5

   0.381295657742848   0.368069318813704   0.352331674107925   0.333782251830442   0.312307692058413

  Columns 6 through 10

   0.288062533024987   0.261478882800364   0.233196144387931   0.203933981053370   0.174365676467823

  Columns 11 through 15

   0.145115983853490   0.116944463067797   0.090722094556870   0.066753708301612                   0

  Columns 16 through 20

                   0                   0                   0                   0                   0

  Column 21

                   0


outer_code_BER =

  Columns 1 through 5

   0.381295657742850   0.368069318813703   0.352331674107926   0.333782251830443   0.312307692058414

  Columns 6 through 10

   0.288062533024987   0.261478882800363   0.233196144387931   0.203933981053371   0.174365676467822

  Columns 11 through 15

   0.145115983853490   0.116944463067797   0.090722094556870   0.066753708302953                   0

  Columns 16 through 20

                   0                   0                   0                   0                   0

  Column 21

                   0


inner_code_BER =

  Columns 1 through 5

   0.381295657742848   0.368069318813704   0.352331674107925   0.333782251830442   0.312307692058413

  Columns 6 through 10

   0.288062533024987   0.261478882800364   0.233196144387931   0.203933981053370   0.174365676467823

  Columns 11 through 15

   0.145115983853490   0.116944463067797   0.090722094556870   0.066753708301612   0.044975994830918

  Columns 16 through 20

                   0                   0                   0                   0                   0

  Column 21

                   0


outer_code_BER =

  Columns 1 through 5

   0.381295657742850   0.368069318813703   0.352331674107926   0.333782251830443   0.312307692058414

  Columns 6 through 10

   0.288062533024987   0.261478882800363   0.233196144387931   0.203933981053371   0.174365676467822

  Columns 11 through 15

   0.145115983853490   0.116944463067797   0.090722094556870   0.066753708302953   0.044975996114345

  Columns 16 through 20

                   0                   0                   0                   0                   0

  Column 21

                   0


inner_code_BER =

  Columns 1 through 5

   0.381295657742848   0.368069318813704   0.352331674107925   0.333782251830442   0.312307692058413

  Columns 6 through 10

   0.288062533024987   0.261478882800364   0.233196144387931   0.203933981053370   0.174365676467823

  Columns 11 through 15

   0.145115983853490   0.116944463067797   0.090722094556870   0.066753708301612   0.044975994830918

  Columns 16 through 20

   0.027854949359558                   0                   0                   0                   0

  Column 21

                   0


outer_code_BER =

  Columns 1 through 5

   0.381295657742850   0.368069318813703   0.352331674107926   0.333782251830443   0.312307692058414

  Columns 6 through 10

   0.288062533024987   0.261478882800363   0.233196144387931   0.203933981053371   0.174365676467822

  Columns 11 through 15

   0.145115983853490   0.116944463067797   0.090722094556870   0.066753708302953   0.044975996114345

  Columns 16 through 20

   0.027855083218702                   0                   0                   0                   0

  Column 21

                   0


inner_code_BER =

  Columns 1 through 5

   0.381295657742848   0.368069318813704   0.352331674107925   0.333782251830442   0.312307692058413

  Columns 6 through 10

   0.288062533024987   0.261478882800364   0.233196144387931   0.203933981053370   0.174365676467823

  Columns 11 through 15

   0.145115983853490   0.116944463067797   0.090722094556870   0.066753708301612   0.044975994830918

  Columns 16 through 20

   0.027854949359558   0.013525480604109                   0                   0                   0

  Column 21

                   0


outer_code_BER =

  Columns 1 through 5

   0.381295657742850   0.368069318813703   0.352331674107926   0.333782251830443   0.312307692058414

  Columns 6 through 10

   0.288062533024987   0.261478882800363   0.233196144387931   0.203933981053371   0.174365676467822

  Columns 11 through 15

   0.145115983853490   0.116944463067797   0.090722094556870   0.066753708302953   0.044975996114345

  Columns 16 through 20

   0.027855083218702   0.013522002707988                   0                   0                   0

  Column 21

                   0


inner_code_BER =

  Columns 1 through 5

   0.381295657742848   0.368069318813704   0.352331674107925   0.333782251830442   0.312307692058413

  Columns 6 through 10

   0.288062533024987   0.261478882800364   0.233196144387931   0.203933981053370   0.174365676467823

  Columns 11 through 15

   0.145115983853490   0.116944463067797   0.090722094556870   0.066753708301612   0.044975994830918

  Columns 16 through 20

   0.027854949359558   0.013525480604109   0.002963856830056                   0                   0

  Column 21

                   0


outer_code_BER =

  Columns 1 through 5

   0.381295657742850   0.368069318813703   0.352331674107926   0.333782251830443   0.312307692058414

  Columns 6 through 10

   0.288062533024987   0.261478882800363   0.233196144387931   0.203933981053371   0.174365676467822

  Columns 11 through 15

   0.145115983853490   0.116944463067797   0.090722094556870   0.066753708302953   0.044975996114345

  Columns 16 through 20

   0.027855083218702   0.013522002707988   0.000000000221619                   0                   0

  Column 21

                   0

µ±Ç°ÍâÂëÎóÂëÂÊÒÑµÍÓÚÄ¿±êÎóÂëÂÊ£¬ÐÅÔë±ÈÎª-0.30 dB

inner_code_BER =

  Columns 1 through 5

   0.381295657742848   0.368069318813704   0.352331674107925   0.333782251830442   0.312307692058413

  Columns 6 through 10

   0.288062533024987   0.261478882800364   0.233196144387931   0.203933981053370   0.174365676467823

  Columns 11 through 15

   0.145115983853490   0.116944463067797   0.090722094556870   0.066753708301612   0.044975994830918

  Columns 16 through 20

   0.027854949359558   0.013525480604109   0.002963856830056   0.002161978549043                   0

  Column 21

                   0


inner_code_BER =

  Columns 1 through 5

   0.381295657742848   0.368069318813704   0.352331674107925   0.333782251830442   0.312307692058413

  Columns 6 through 10

   0.288062533024987   0.261478882800364   0.233196144387931   0.203933981053370   0.174365676467823

  Columns 11 through 15

   0.145115983853490   0.116944463067797   0.090722094556870   0.066753708301612   0.044975994830918

  Columns 16 through 20

   0.027854949359558   0.013525480604109   0.002963856830056   0.002161978549043   0.001693810519974

  Column 21

                   0


inner_code_BER =

  Columns 1 through 5

   0.381295657742848   0.368069318813704   0.352331674107925   0.333782251830442   0.312307692058413

  Columns 6 through 10

   0.288062533024987   0.261478882800364   0.233196144387931   0.203933981053370   0.174365676467823

  Columns 11 through 15

   0.145115983853490   0.116944463067797   0.090722094556870   0.066753708301612   0.044975994830918

  Columns 16 through 20

   0.027854949359558   0.013525480604109   0.002963856830056   0.002161978549043   0.001693810519974

  Column 21

   0.001371970232011

Elapsed time is 17888.550977 seconds.
