# Supplementary material for: An Efficient Design of Systematic Rateless Codes
Source: Hindawi journal article supplement (doi:10.1155/2020/8068414), 2020-05-19
Supplement: f1 [file 8068414.f1.zip › supplementary files/Matlab_code_for_Figure1/BER_by_DDE/仿真结果/关键BER结果/Critical_BER_by_DDE_rate_090_dv3.txt]

µ±Ç°Êä³öÂë×ÖµÄÂëÂÊ=0.90000,dv=3,dc=30
ÖÆ±í³É¹¦
µ±Ç°ÊäÈëÎóÂëÂÊ=1.00000e-02£¬¶ÔÓ¦µÄÊä³öÎóÂëÂÊ=1.50935e-08
µ±Ç°ÊäÈëÎóÂëÂÊ=1.10000e-02£¬¶ÔÓ¦µÄÊä³öÎóÂëÂÊ=5.92175e-07
µ±Ç°ÊäÈëÎóÂëÂÊ=1.20000e-02£¬¶ÔÓ¦µÄÊä³öÎóÂëÂÊ=5.08596e-08
µ±Ç°ÊäÈëÎóÂëÂÊ=1.30000e-02£¬¶ÔÓ¦µÄÊä³öÎóÂëÂÊ=5.11498e-09
µ±Ç°ÊäÈëÎóÂëÂÊ=1.40000e-02£¬¶ÔÓ¦µÄÊä³öÎóÂëÂÊ=1.15579e-09
µ±Ç°ÊäÈëÎóÂëÂÊ=1.50000e-02£¬¶ÔÓ¦µÄÊä³öÎóÂëÂÊ=1.35760e-09
µ±Ç°ÊäÈëÎóÂëÂÊ=1.60000e-02£¬¶ÔÓ¦µÄÊä³öÎóÂëÂÊ=1.58084e-08
µ±Ç°ÊäÈëÎóÂëÂÊ=1.70000e-02£¬¶ÔÓ¦µÄÊä³öÎóÂëÂÊ=1.57968e-09
µ±Ç°ÊäÈëÎóÂëÂÊ=1.80000e-02£¬¶ÔÓ¦µÄÊä³öÎóÂëÂÊ=9.56730e-08
µ±Ç°ÊäÈëÎóÂëÂÊ=1.90000e-02£¬¶ÔÓ¦µÄÊä³öÎóÂëÂÊ=6.15250e-07
µ±Ç°ÊäÈëÎóÂëÂÊ=2.00000e-02£¬¶ÔÓ¦µÄÊä³öÎóÂëÂÊ=7.76659e-08
ÕÒµ½µ±Ç°ÊäÈëÎóÂëÂÊÃÅÏÞ=2.00000e-02£¬¶ÔÓ¦µÄÊä³öÎóÂëÂÊ=7.76659e-08
µ±Ç°ÊäÈëÎóÂëÂÊ=2.00000e-02£¬¶ÔÓ¦µÄÊä³öÎóÂëÂÊ=7.76659e-08
µ±Ç°ÊäÈëÎóÂëÂÊ=2.01000e-02£¬¶ÔÓ¦µÄÊä³öÎóÂëÂÊ=2.32025e-07
µ±Ç°ÊäÈëÎóÂëÂÊ=2.02000e-02£¬¶ÔÓ¦µÄÊä³öÎóÂëÂÊ=3.16272e-08
µ±Ç°ÊäÈëÎóÂëÂÊ=2.03000e-02£¬¶ÔÓ¦µÄÊä³öÎóÂëÂÊ=4.96578e-07
µ±Ç°ÊäÈëÎóÂëÂÊ=2.04000e-02£¬¶ÔÓ¦µÄÊä³öÎóÂëÂÊ=5.79434e-08
µ±Ç°ÊäÈëÎóÂëÂÊ=2.05000e-02£¬¶ÔÓ¦µÄÊä³öÎóÂëÂÊ=8.91037e-09
µ±Ç°ÊäÈëÎóÂëÂÊ=2.06000e-02£¬¶ÔÓ¦µÄÊä³öÎóÂëÂÊ=2.90285e-08
µ±Ç°ÊäÈëÎóÂëÂÊ=2.07000e-02£¬¶ÔÓ¦µÄÊä³öÎóÂëÂÊ=2.91462e-07
ÕÒµ½µ±Ç°ÊäÈëÎóÂëÂÊÃÅÏÞ=2.07000e-02£¬¶ÔÓ¦µÄÊä³öÎóÂëÂÊ=2.91462e-07
Elapsed time is 471.849111 seconds.
