# Supplementary material for: An Efficient Design of Systematic Rateless Codes
Source: Hindawi journal article supplement (doi:10.1155/2020/8068414), 2020-05-19
Supplement: f1 [file 8068414.f1.zip › supplementary files/Matlab_code_for_Figure1/BER_by_DDE/仿真结果/关键BER结果/Critical_BER_by_DDE_rate_090_dv4.txt]

µ±Ç°Êä³öÂë×ÖµÄÂëÂÊ=0.90000,dv=4,dc=40
ÖÆ±í³É¹¦
{Undefined function or variable 'inner_iter_max'.

Error in <a href="matlab:matlab.internal.language.introspective.errorDocCallback('DDE_algo_main_find_crit_BER_of_out_code', 'E:\Ñ§Êõ\ÂÛÎÄ\20180914ÎÞÂëÂÊÂëË¥ÂäÐÅµÀ\³ÌÐò\ÀëÉ¢ÃÜ¶È½ø»¯»ñÈ¡ÃÅÏÞÖµ\DDE_algo_main_find_crit_BER_of_out_code.m', 76)" style="font-weight:bold">DDE_algo_main_find_crit_BER_of_out_code</a> (<a href="matlab: opentoline('E:\Ñ§Êõ\ÂÛÎÄ\20180914ÎÞÂëÂÊÂëË¥ÂäÐÅµÀ\³ÌÐò\ÀëÉ¢ÃÜ¶È½ø»¯»ñÈ¡ÃÅÏÞÖµ\DDE_algo_main_find_crit_BER_of_out_code.m',76,0)">line 76</a>)
    elseif  iter_index==inner_iter_max
} 
matlab.internal.language.introspective.errorDocCallback('DDE_algo_main_find_crit_BER_of_out_code', 'E:\Ñ§Êõ\ÂÛÎÄ\20180914ÎÞÂëÂÊÂëË¥ÂäÐÅµÀ\³ÌÐò\ÀëÉ¢ÃÜ¶È½ø»¯»ñÈ¡ÃÅÏÞÖµ\DDE_algo_main_find_crit_BER_of_out_code.m', 76)
matlab.internal.language.introspective.errorDocCallback('DDE_algo_main_find_crit_BER_of_out_code', 'E:\Ñ§Êõ\ÂÛÎÄ\20180914ÎÞÂëÂÊÂëË¥ÂäÐÅµÀ\³ÌÐò\ÀëÉ¢ÃÜ¶È½ø»¯»ñÈ¡ÃÅÏÞÖµ\DDE_algo_main_find_crit_BER_of_out_code.m', 76)
opentoline('E:\Ñ§Êõ\ÂÛÎÄ\20180914ÎÞÂëÂÊÂëË¥ÂäÐÅµÀ\³ÌÐò\ÀëÉ¢ÃÜ¶È½ø»¯»ñÈ¡ÃÅÏÞÖµ\DDE_algo_main_find_crit_BER_of_out_code.m',76,0)
DDE_algo_main_find_crit_BER_of_out_code
µ±Ç°Êä³öÂë×ÖµÄÂëÂÊ=0.90000,dv=4,dc=40
ÖÆ±í³É¹¦
µ±Ç°ÊäÈëÎóÂëÂÊ=1.00000e-03£¬¶ÔÓ¦µÄÊä³öÎóÂëÂÊ=1.60206e-11
µ±Ç°ÊäÈëÎóÂëÂÊ=2.00000e-03£¬¶ÔÓ¦µÄÊä³öÎóÂëÂÊ=1.52795e-08
µ±Ç°ÊäÈëÎóÂëÂÊ=3.00000e-03£¬¶ÔÓ¦µÄÊä³öÎóÂëÂÊ=5.83020e-07
µ±Ç°ÊäÈëÎóÂëÂÊ=4.00000e-03£¬¶ÔÓ¦µÄÊä³öÎóÂëÂÊ=3.15597e-11
µ±Ç°ÊäÈëÎóÂëÂÊ=5.00000e-03£¬¶ÔÓ¦µÄÊä³öÎóÂëÂÊ=4.25162e-09
µ±Ç°ÊäÈëÎóÂëÂÊ=6.00000e-03£¬¶ÔÓ¦µÄÊä³öÎóÂëÂÊ=1.52151e-07
{Operation terminated by user during <a href="matlab:matlab.internal.language.introspective.errorDocCallback('ChNode_R2_first_fun', 'E:\Ñ§Êõ\ÂÛÎÄ\20180914ÎÞÂëÂÊÂëË¥ÂäÐÅµÀ\³ÌÐò\ÀëÉ¢ÃÜ¶È½ø»¯»ñÈ¡ÃÅÏÞÖµ\ChNode_R2_first_fun.m', 4)" style="font-weight:bold">ChNode_R2_first_fun</a> (<a href="matlab: opentoline('E:\Ñ§Êõ\ÂÛÎÄ\20180914ÎÞÂëÂÊÂëË¥ÂäÐÅµÀ\³ÌÐò\ÀëÉ¢ÃÜ¶È½ø»¯»ñÈ¡ÃÅÏÞÖµ\ChNode_R2_first_fun.m',4,0)">line 4</a>)


In <a href="matlab:matlab.internal.language.introspective.errorDocCallback('DDE_algo_main_find_crit_BER_of_out_code', 'E:\Ñ§Êõ\ÂÛÎÄ\20180914ÎÞÂëÂÊÂëË¥ÂäÐÅµÀ\³ÌÐò\ÀëÉ¢ÃÜ¶È½ø»¯»ñÈ¡ÃÅÏÞÖµ\DDE_algo_main_find_crit_BER_of_out_code.m', 58)" style="font-weight:bold">DDE_algo_main_find_crit_BER_of_out_code</a> (<a href="matlab: opentoline('E:\Ñ§Êõ\ÂÛÎÄ\20180914ÎÞÂëÂÊÂëË¥ÂäÐÅµÀ\³ÌÐò\ÀëÉ¢ÃÜ¶È½ø»¯»ñÈ¡ÃÅÏÞÖµ\DDE_algo_main_find_crit_BER_of_out_code.m',58,0)">line 58</a>)
            temp_qu(ii_index,:)=ChNode_R2_first_fun(ii_vec,jj_vec,startpoint_vec,ij_length_dist,temp_qu(ii_index-1,:),qv,delta);} 
DDE_algo_main_find_crit_BER_of_out_code
µ±Ç°Êä³öÂë×ÖµÄÂëÂÊ=0.90000,dv=4,dc=40
ÖÆ±í³É¹¦
µ±Ç°ÊäÈëÎóÂëÂÊ=1.00000e-03£¬¶ÔÓ¦µÄÊä³öÎóÂëÂÊ=1.60206e-11
µ±Ç°ÊäÈëÎóÂëÂÊ=2.00000e-03£¬¶ÔÓ¦µÄÊä³öÎóÂëÂÊ=1.52795e-08
µ±Ç°ÊäÈëÎóÂëÂÊ=3.00000e-03£¬¶ÔÓ¦µÄÊä³öÎóÂëÂÊ=5.83020e-07
µ±Ç°ÊäÈëÎóÂëÂÊ=4.00000e-03£¬¶ÔÓ¦µÄÊä³öÎóÂëÂÊ=3.15597e-11
µ±Ç°ÊäÈëÎóÂëÂÊ=5.00000e-03£¬¶ÔÓ¦µÄÊä³öÎóÂëÂÊ=4.25162e-09
µ±Ç°ÊäÈëÎóÂëÂÊ=6.00000e-03£¬¶ÔÓ¦µÄÊä³öÎóÂëÂÊ=1.52151e-07
µ±Ç°ÊäÈëÎóÂëÂÊ=7.00000e-03£¬¶ÔÓ¦µÄÊä³öÎóÂëÂÊ=2.89846e-12
µ±Ç°ÊäÈëÎóÂëÂÊ=8.00000e-03£¬¶ÔÓ¦µÄÊä³öÎóÂëÂÊ=1.06127e-09
µ±Ç°ÊäÈëÎóÂëÂÊ=9.00000e-03£¬¶ÔÓ¦µÄÊä³öÎóÂëÂÊ=8.98047e-08
µ±Ç°ÊäÈëÎóÂëÂÊ=1.00000e-02£¬¶ÔÓ¦µÄÊä³öÎóÂëÂÊ=5.53163e-12
µ±Ç°ÊäÈëÎóÂëÂÊ=1.10000e-02£¬¶ÔÓ¦µÄÊä³öÎóÂëÂÊ=6.26950e-09
µ±Ç°ÊäÈëÎóÂëÂÊ=1.20000e-02£¬¶ÔÓ¦µÄÊä³öÎóÂëÂÊ=9.18919e-07
µ±Ç°ÊäÈëÎóÂëÂÊ=1.30000e-02£¬¶ÔÓ¦µÄÊä³öÎóÂëÂÊ=6.93216e-09
µ±Ç°ÊäÈëÎóÂëÂÊ=1.40000e-02£¬¶ÔÓ¦µÄÊä³öÎóÂëÂÊ=2.13456e-11
µ±Ç°ÊäÈëÎóÂëÂÊ=1.50000e-02£¬¶ÔÓ¦µÄÊä³öÎóÂëÂÊ=7.18844e-07
µ±Ç°ÊäÈëÎóÂëÂÊ=1.60000e-02£¬¶ÔÓ¦µÄÊä³öÎóÂëÂÊ=8.21343e-07
µ±Ç°ÊäÈëÎóÂëÂÊ=1.70000e-02£¬¶ÔÓ¦µÄÊä³öÎóÂëÂÊ=7.47469e-10
µ±Ç°ÊäÈëÎóÂëÂÊ=1.80000e-02£¬¶ÔÓ¦µÄÊä³öÎóÂëÂÊ=3.62125e-09
µ±Ç°ÊäÈëÎóÂëÂÊ=1.90000e-02£¬¶ÔÓ¦µÄÊä³öÎóÂëÂÊ=2.85125e-10
µ±Ç°ÊäÈëÎóÂëÂÊ=2.00000e-02£¬¶ÔÓ¦µÄÊä³öÎóÂëÂÊ=2.50227e-07
ÕÒµ½µ±Ç°ÊäÈëÎóÂëÂÊÃÅÏÞ=2.00000e-02£¬¶ÔÓ¦µÄÊä³öÎóÂëÂÊ=2.50227e-07
µ±Ç°ÊäÈëÎóÂëÂÊ=2.00000e-02£¬¶ÔÓ¦µÄÊä³öÎóÂëÂÊ=2.50227e-07
µ±Ç°ÊäÈëÎóÂëÂÊ=2.01000e-02£¬¶ÔÓ¦µÄÊä³öÎóÂëÂÊ=1.86740e-07
µ±Ç°ÊäÈëÎóÂëÂÊ=2.02000e-02£¬¶ÔÓ¦µÄÊä³öÎóÂëÂÊ=6.54011e-07
µ±Ç°ÊäÈëÎóÂëÂÊ=2.03000e-02£¬¶ÔÓ¦µÄÊä³öÎóÂëÂÊ=3.25449e-10
µ±Ç°ÊäÈëÎóÂëÂÊ=2.04000e-02£¬¶ÔÓ¦µÄÊä³öÎóÂëÂÊ=2.59100e-12
µ±Ç°ÊäÈëÎóÂëÂÊ=2.05000e-02£¬¶ÔÓ¦µÄÊä³öÎóÂëÂÊ=1.61681e-07
ÕÒµ½µ±Ç°ÊäÈëÎóÂëÂÊÃÅÏÞ=2.05000e-02£¬¶ÔÓ¦µÄÊä³öÎóÂëÂÊ=1.61681e-07
µ±Ç°ÊäÈëÎóÂëÂÊ=2.05000e-02£¬¶ÔÓ¦µÄÊä³öÎóÂëÂÊ=1.61681e-07
µ±Ç°ÊäÈëÎóÂëÂÊ=2.05100e-02£¬¶ÔÓ¦µÄÊä³öÎóÂëÂÊ=9.84845e-07
{Operation terminated by user during <a href="matlab:matlab.internal.language.introspective.errorDocCallback('ChNode_R2_first_fun', 'E:\Ñ§Êõ\ÂÛÎÄ\20180914ÎÞÂëÂÊÂëË¥ÂäÐÅµÀ\³ÌÐò\ÀëÉ¢ÃÜ¶È½ø»¯»ñÈ¡ÃÅÏÞÖµ\ChNode_R2_first_fun.m', 4)" style="font-weight:bold">ChNode_R2_first_fun</a> (<a href="matlab: opentoline('E:\Ñ§Êõ\ÂÛÎÄ\20180914ÎÞÂëÂÊÂëË¥ÂäÐÅµÀ\³ÌÐò\ÀëÉ¢ÃÜ¶È½ø»¯»ñÈ¡ÃÅÏÞÖµ\ChNode_R2_first_fun.m',4,0)">line 4</a>)


In <a href="matlab:matlab.internal.language.introspective.errorDocCallback('DDE_algo_main_find_crit_BER_of_out_code', 'E:\Ñ§Êõ\ÂÛÎÄ\20180914ÎÞÂëÂÊÂëË¥ÂäÐÅµÀ\³ÌÐò\ÀëÉ¢ÃÜ¶È½ø»¯»ñÈ¡ÃÅÏÞÖµ\DDE_algo_main_find_crit_BER_of_out_code.m', 58)" style="font-weight:bold">DDE_algo_main_find_crit_BER_of_out_code</a> (<a href="matlab: opentoline('E:\Ñ§Êõ\ÂÛÎÄ\20180914ÎÞÂëÂÊÂëË¥ÂäÐÅµÀ\³ÌÐò\ÀëÉ¢ÃÜ¶È½ø»¯»ñÈ¡ÃÅÏÞÖµ\DDE_algo_main_find_crit_BER_of_out_code.m',58,0)">line 58</a>)
            temp_qu(ii_index,:)=ChNode_R2_first_fun(ii_vec,jj_vec,startpoint_vec,ij_length_dist,temp_qu(ii_index-1,:),qv,delta);} 
delta_BER

delta_BER =

     1.000000000000000e-05

DDE_algo_main_find_crit_BER_of_out_code
µ±Ç°Êä³öÂë×ÖµÄÂëÂÊ=0.90000,dv=4,dc=40
ÖÆ±í³É¹¦
µ±Ç°ÊäÈëÎóÂëÂÊ=1.90000e-02£¬¶ÔÓ¦µÄÊä³öÎóÂëÂÊ=2.85125e-10
µ±Ç°ÊäÈëÎóÂëÂÊ=2.00000e-02£¬¶ÔÓ¦µÄÊä³öÎóÂëÂÊ=2.50227e-07
ÕÒµ½µ±Ç°ÊäÈëÎóÂëÂÊÃÅÏÞ=2.00000e-02£¬¶ÔÓ¦µÄÊä³öÎóÂëÂÊ=2.50227e-07
µ±Ç°ÊäÈëÎóÂëÂÊ=2.00000e-02£¬¶ÔÓ¦µÄÊä³öÎóÂëÂÊ=2.50227e-07
µ±Ç°ÊäÈëÎóÂëÂÊ=2.01000e-02£¬¶ÔÓ¦µÄÊä³öÎóÂëÂÊ=1.86740e-07
µ±Ç°ÊäÈëÎóÂëÂÊ=2.02000e-02£¬¶ÔÓ¦µÄÊä³öÎóÂëÂÊ=6.54011e-07
µ±Ç°ÊäÈëÎóÂëÂÊ=2.03000e-02£¬¶ÔÓ¦µÄÊä³öÎóÂëÂÊ=3.25450e-10
µ±Ç°ÊäÈëÎóÂëÂÊ=2.04000e-02£¬¶ÔÓ¦µÄÊä³öÎóÂëÂÊ=2.59100e-12
µ±Ç°ÊäÈëÎóÂëÂÊ=2.05000e-02£¬¶ÔÓ¦µÄÊä³öÎóÂëÂÊ=1.61681e-07
ÕÒµ½µ±Ç°ÊäÈëÎóÂëÂÊÃÅÏÞ=2.05000e-02£¬¶ÔÓ¦µÄÊä³öÎóÂëÂÊ=1.61681e-07
Elapsed time is 503.381854 seconds.
