# Supplementary material for: An Efficient Design of Systematic Rateless Codes
Source: Hindawi journal article supplement (doi:10.1155/2020/8068414), 2020-05-19
Supplement: f1 [file 8068414.f1.zip › supplementary files/Matlab_code_for_Figure1/BER_by_DDE/仿真结果/关键BER结果/Critical_BER_by_DDE_rate_090_dv5.txt]

µ±Ç°Êä³öÂë×ÖµÄÂëÂÊ=0.90000,dv=5,dc=50
ÖÆ±í³É¹¦
µ±Ç°ÊäÈëÎóÂëÂÊ=1.00000e-02£¬¶ÔÓ¦µÄÊä³öÎóÂëÂÊ=1.02311e-07
µ±Ç°ÊäÈëÎóÂëÂÊ=1.10000e-02£¬¶ÔÓ¦µÄÊä³öÎóÂëÂÊ=9.41192e-13
µ±Ç°ÊäÈëÎóÂëÂÊ=1.20000e-02£¬¶ÔÓ¦µÄÊä³öÎóÂëÂÊ=3.01816e-08
µ±Ç°ÊäÈëÎóÂëÂÊ=1.30000e-02£¬¶ÔÓ¦µÄÊä³öÎóÂëÂÊ=1.03331e-11
µ±Ç°ÊäÈëÎóÂëÂÊ=1.40000e-02£¬¶ÔÓ¦µÄÊä³öÎóÂëÂÊ=4.52046e-15
µ±Ç°ÊäÈëÎóÂëÂÊ=1.50000e-02£¬¶ÔÓ¦µÄÊä³öÎóÂëÂÊ=2.74457e-15
µ±Ç°ÊäÈëÎóÂëÂÊ=1.60000e-02£¬¶ÔÓ¦µÄÊä³öÎóÂëÂÊ=2.54332e-10
µ±Ç°ÊäÈëÎóÂëÂÊ=1.70000e-02£¬¶ÔÓ¦µÄÊä³öÎóÂëÂÊ=4.30551e-08
µ±Ç°ÊäÈëÎóÂëÂÊ=1.80000e-02£¬¶ÔÓ¦µÄÊä³öÎóÂëÂÊ=2.36350e-08
µ±Ç°ÊäÈëÎóÂëÂÊ=1.90000e-02£¬¶ÔÓ¦µÄÊä³öÎóÂëÂÊ=1.26262e-08
ÕÒµ½µ±Ç°ÊäÈëÎóÂëÂÊÃÅÏÞ=1.90000e-02£¬¶ÔÓ¦µÄÊä³öÎóÂëÂÊ=1.26262e-08
µ±Ç°ÊäÈëÎóÂëÂÊ=1.90000e-02£¬¶ÔÓ¦µÄÊä³öÎóÂëÂÊ=1.26262e-08
ÕÒµ½µ±Ç°ÊäÈëÎóÂëÂÊÃÅÏÞ=1.90000e-02£¬¶ÔÓ¦µÄÊä³öÎóÂëÂÊ=1.26262e-08
Elapsed time is 546.275788 seconds.
