# Supplementary material for: An Efficient Design of Systematic Rateless Codes
Source: Hindawi journal article supplement (doi:10.1155/2020/8068414), 2020-05-19
Supplement: f1 [file 8068414.f1.zip › supplementary files/Matlab_code_for_Figure1/BER_by_DDE/仿真结果/关键BER结果/Critical_BER_by_DDE_rate_095_dv3.txt]

µ±Ç°Êä³öÂë×ÖµÄÂëÂÊ=0.95000,dv=3,dc=60
ÖÆ±í³É¹¦
µ±Ç°ÊäÈëÎóÂëÂÊ=1.00000e-03£¬¶ÔÓ¦µÄÊä³öÎóÂëÂÊ=8.51846e-07
µ±Ç°ÊäÈëÎóÂëÂÊ=2.00000e-03£¬¶ÔÓ¦µÄÊä³öÎóÂëÂÊ=3.16274e-07
µ±Ç°ÊäÈëÎóÂëÂÊ=3.00000e-03£¬¶ÔÓ¦µÄÊä³öÎóÂëÂÊ=9.28851e-08
µ±Ç°ÊäÈëÎóÂëÂÊ=4.00000e-03£¬¶ÔÓ¦µÄÊä³öÎóÂëÂÊ=4.01419e-08
µ±Ç°ÊäÈëÎóÂëÂÊ=5.00000e-03£¬¶ÔÓ¦µÄÊä³öÎóÂëÂÊ=4.74982e-08
µ±Ç°ÊäÈëÎóÂëÂÊ=6.00000e-03£¬¶ÔÓ¦µÄÊä³öÎóÂëÂÊ=2.70840e-07
µ±Ç°ÊäÈëÎóÂëÂÊ=7.00000e-03£¬¶ÔÓ¦µÄÊä³öÎóÂëÂÊ=7.26338e-08
µ±Ç°ÊäÈëÎóÂëÂÊ=8.00000e-03£¬¶ÔÓ¦µÄÊä³öÎóÂëÂÊ=2.52388e-08
µ±Ç°ÊäÈëÎóÂëÂÊ=9.00000e-03£¬¶ÔÓ¦µÄÊä³öÎóÂëÂÊ=6.13148e-08
ÕÒµ½µ±Ç°ÊäÈëÎóÂëÂÊÃÅÏÞ=9.00000e-03£¬¶ÔÓ¦µÄÊä³öÎóÂëÂÊ=6.13148e-08
µ±Ç°ÊäÈëÎóÂëÂÊ=9.00000e-03£¬¶ÔÓ¦µÄÊä³öÎóÂëÂÊ=6.13148e-08
µ±Ç°ÊäÈëÎóÂëÂÊ=9.10000e-03£¬¶ÔÓ¦µÄÊä³öÎóÂëÂÊ=1.20583e-07
µ±Ç°ÊäÈëÎóÂëÂÊ=9.20000e-03£¬¶ÔÓ¦µÄÊä³öÎóÂëÂÊ=6.07450e-07
µ±Ç°ÊäÈëÎóÂëÂÊ=9.30000e-03£¬¶ÔÓ¦µÄÊä³öÎóÂëÂÊ=6.23732e-08
µ±Ç°ÊäÈëÎóÂëÂÊ=9.40000e-03£¬¶ÔÓ¦µÄÊä³öÎóÂëÂÊ=4.59541e-08
µ±Ç°ÊäÈëÎóÂëÂÊ=9.50000e-03£¬¶ÔÓ¦µÄÊä³öÎóÂëÂÊ=6.98831e-07
µ±Ç°ÊäÈëÎóÂëÂÊ=9.60000e-03£¬¶ÔÓ¦µÄÊä³öÎóÂëÂÊ=2.14258e-08
µ±Ç°ÊäÈëÎóÂëÂÊ=9.70000e-03£¬¶ÔÓ¦µÄÊä³öÎóÂëÂÊ=1.45133e-08
µ±Ç°ÊäÈëÎóÂëÂÊ=9.80000e-03£¬¶ÔÓ¦µÄÊä³öÎóÂëÂÊ=9.22671e-08
µ±Ç°ÊäÈëÎóÂëÂÊ=9.90000e-03£¬¶ÔÓ¦µÄÊä³öÎóÂëÂÊ=2.12468e-08
ÕÒµ½µ±Ç°ÊäÈëÎóÂëÂÊÃÅÏÞ=9.90000e-03£¬¶ÔÓ¦µÄÊä³öÎóÂëÂÊ=2.12468e-08
Elapsed time is 814.534101 seconds.
