# Supplementary material for: An Efficient Design of Systematic Rateless Codes
Source: Hindawi journal article supplement (doi:10.1155/2020/8068414), 2020-05-19
Supplement: f1 [file 8068414.f1.zip › supplementary files/Matlab_code_for_Figure1/BER_by_DDE/仿真结果/关键BER结果/Critical_BER_by_DDE_rate_095_dv4.txt]

µ±Ç°Êä³öÂë×ÖµÄÂëÂÊ=0.95000,dv=4,dc=80
ÖÆ±í³É¹¦
µ±Ç°ÊäÈëÎóÂëÂÊ=1.00000e-03£¬¶ÔÓ¦µÄÊä³öÎóÂëÂÊ=1.04816e-08
µ±Ç°ÊäÈëÎóÂëÂÊ=2.00000e-03£¬¶ÔÓ¦µÄÊä³öÎóÂëÂÊ=3.57800e-11
µ±Ç°ÊäÈëÎóÂëÂÊ=3.00000e-03£¬¶ÔÓ¦µÄÊä³öÎóÂëÂÊ=1.39401e-07
µ±Ç°ÊäÈëÎóÂëÂÊ=4.00000e-03£¬¶ÔÓ¦µÄÊä³öÎóÂëÂÊ=2.03832e-09
µ±Ç°ÊäÈëÎóÂëÂÊ=5.00000e-03£¬¶ÔÓ¦µÄÊä³öÎóÂëÂÊ=3.81683e-11
µ±Ç°ÊäÈëÎóÂëÂÊ=6.00000e-03£¬¶ÔÓ¦µÄÊä³öÎóÂëÂÊ=1.43085e-11
µ±Ç°ÊäÈëÎóÂëÂÊ=7.00000e-03£¬¶ÔÓ¦µÄÊä³öÎóÂëÂÊ=2.17559e-09
µ±Ç°ÊäÈëÎóÂëÂÊ=8.00000e-03£¬¶ÔÓ¦µÄÊä³öÎóÂëÂÊ=6.88982e-09
µ±Ç°ÊäÈëÎóÂëÂÊ=9.00000e-03£¬¶ÔÓ¦µÄÊä³öÎóÂëÂÊ=8.57520e-07
µ±Ç°ÊäÈëÎóÂëÂÊ=1.00000e-02£¬¶ÔÓ¦µÄÊä³öÎóÂëÂÊ=6.42451e-07
ÕÒµ½µ±Ç°ÊäÈëÎóÂëÂÊÃÅÏÞ=1.00000e-02£¬¶ÔÓ¦µÄÊä³öÎóÂëÂÊ=6.42451e-07
µ±Ç°ÊäÈëÎóÂëÂÊ=1.00000e-02£¬¶ÔÓ¦µÄÊä³öÎóÂëÂÊ=6.42451e-07
ÕÒµ½µ±Ç°ÊäÈëÎóÂëÂÊÃÅÏÞ=1.00000e-02£¬¶ÔÓ¦µÄÊä³öÎóÂëÂÊ=6.42451e-07
Elapsed time is 1009.917403 seconds.
