# Supplementary material for: An Efficient Design of Systematic Rateless Codes
Source: Hindawi journal article supplement (doi:10.1155/2020/8068414), 2020-05-19
Supplement: f1 [file 8068414.f1.zip › supplementary files/Matlab_code_for_Figure1/BER_by_DDE/仿真结果/关键BER结果/Critical_BER_by_DDE_rate_095_dv5.txt]

µ±Ç°Êä³öÂë×ÖµÄÂëÂÊ=0.95000,dv=5,dc=100
ÖÆ±í³É¹¦
µ±Ç°ÊäÈëÎóÂëÂÊ=1.00000e-03£¬¶ÔÓ¦µÄÊä³öÎóÂëÂÊ=1.10823e-10
µ±Ç°ÊäÈëÎóÂëÂÊ=2.00000e-03£¬¶ÔÓ¦µÄÊä³öÎóÂëÂÊ=6.77227e-07
µ±Ç°ÊäÈëÎóÂëÂÊ=3.00000e-03£¬¶ÔÓ¦µÄÊä³öÎóÂëÂÊ=1.24967e-09
µ±Ç°ÊäÈëÎóÂëÂÊ=4.00000e-03£¬¶ÔÓ¦µÄÊä³öÎóÂëÂÊ=9.72472e-14
µ±Ç°ÊäÈëÎóÂëÂÊ=5.00000e-03£¬¶ÔÓ¦µÄÊä³öÎóÂëÂÊ=1.80609e-07
µ±Ç°ÊäÈëÎóÂëÂÊ=6.00000e-03£¬¶ÔÓ¦µÄÊä³öÎóÂëÂÊ=1.31639e-07
µ±Ç°ÊäÈëÎóÂëÂÊ=7.00000e-03£¬¶ÔÓ¦µÄÊä³öÎóÂëÂÊ=1.33440e-11
µ±Ç°ÊäÈëÎóÂëÂÊ=8.00000e-03£¬¶ÔÓ¦µÄÊä³öÎóÂëÂÊ=2.12833e-14
µ±Ç°ÊäÈëÎóÂëÂÊ=9.00000e-03£¬¶ÔÓ¦µÄÊä³öÎóÂëÂÊ=1.57946e-07
ÕÒµ½µ±Ç°ÊäÈëÎóÂëÂÊÃÅÏÞ=9.00000e-03£¬¶ÔÓ¦µÄÊä³öÎóÂëÂÊ=1.57946e-07
µ±Ç°ÊäÈëÎóÂëÂÊ=9.00000e-03£¬¶ÔÓ¦µÄÊä³öÎóÂëÂÊ=1.57946e-07
µ±Ç°ÊäÈëÎóÂëÂÊ=9.10000e-03£¬¶ÔÓ¦µÄÊä³öÎóÂëÂÊ=3.44693e-07
µ±Ç°ÊäÈëÎóÂëÂÊ=9.20000e-03£¬¶ÔÓ¦µÄÊä³öÎóÂëÂÊ=4.86068e-08
µ±Ç°ÊäÈëÎóÂëÂÊ=9.30000e-03£¬¶ÔÓ¦µÄÊä³öÎóÂëÂÊ=2.85247e-13
ÕÒµ½µ±Ç°ÊäÈëÎóÂëÂÊÃÅÏÞ=9.30000e-03£¬¶ÔÓ¦µÄÊä³öÎóÂëÂÊ=2.85247e-13
Elapsed time is 1074.686328 seconds.
