# Supplementary material for: An Efficient Design of Systematic Rateless Codes
Source: Hindawi journal article supplement (doi:10.1155/2020/8068414), 2020-05-19
Supplement: f1 [file 8068414.f1.zip › supplementary files/Matlab_code_for_Figure1/BER_by_DDE/仿真结果/关键BER结果/Critical_BER_by_DDE_rate_098_dv3.txt]

µ±Ç°Êä³öÂë×ÖµÄÂëÂÊ=0.98000,dv=3,dc=150
ÖÆ±í³É¹¦
µ±Ç°ÊäÈëÎóÂëÂÊ=1.00000e-03£¬¶ÔÓ¦µÄÊä³öÎóÂëÂÊ=3.34855e-09
µ±Ç°ÊäÈëÎóÂëÂÊ=2.00000e-03£¬¶ÔÓ¦µÄÊä³öÎóÂëÂÊ=8.56021e-08
µ±Ç°ÊäÈëÎóÂëÂÊ=3.00000e-03£¬¶ÔÓ¦µÄÊä³öÎóÂëÂÊ=5.76474e-08
µ±Ç°ÊäÈëÎóÂëÂÊ=4.00000e-03£¬¶ÔÓ¦µÄÊä³öÎóÂëÂÊ=2.21786e-03
ÕÒµ½µ±Ç°ÊäÈëÎóÂëÂÊÃÅÏÞ=3.00000e-03£¬¶ÔÓ¦µÄÊä³öÎóÂëÂÊ=5.76474e-08
µ±Ç°ÊäÈëÎóÂëÂÊ=3.00000e-03£¬¶ÔÓ¦µÄÊä³öÎóÂëÂÊ=5.76474e-08
µ±Ç°ÊäÈëÎóÂëÂÊ=3.10000e-03£¬¶ÔÓ¦µÄÊä³öÎóÂëÂÊ=3.76348e-08
µ±Ç°ÊäÈëÎóÂëÂÊ=3.20000e-03£¬¶ÔÓ¦µÄÊä³öÎóÂëÂÊ=7.29973e-08
µ±Ç°ÊäÈëÎóÂëÂÊ=3.30000e-03£¬¶ÔÓ¦µÄÊä³öÎóÂëÂÊ=4.70576e-07
µ±Ç°ÊäÈëÎóÂëÂÊ=3.40000e-03£¬¶ÔÓ¦µÄÊä³öÎóÂëÂÊ=1.87760e-07
µ±Ç°ÊäÈëÎóÂëÂÊ=3.50000e-03£¬¶ÔÓ¦µÄÊä³öÎóÂëÂÊ=9.17572e-09
µ±Ç°ÊäÈëÎóÂëÂÊ=3.60000e-03£¬¶ÔÓ¦µÄÊä³öÎóÂëÂÊ=4.77159e-07
µ±Ç°ÊäÈëÎóÂëÂÊ=3.70000e-03£¬¶ÔÓ¦µÄÊä³öÎóÂëÂÊ=1.37101e-07
µ±Ç°ÊäÈëÎóÂëÂÊ=3.80000e-03£¬¶ÔÓ¦µÄÊä³öÎóÂëÂÊ=2.03833e-07
µ±Ç°ÊäÈëÎóÂëÂÊ=3.90000e-03£¬¶ÔÓ¦µÄÊä³öÎóÂëÂÊ=1.86856e-03
ÕÒµ½µ±Ç°ÊäÈëÎóÂëÂÊÃÅÏÞ=3.80000e-03£¬¶ÔÓ¦µÄÊä³öÎóÂëÂÊ=2.03833e-07
Elapsed time is 1646.193017 seconds.
