# Supplementary material for: An Efficient Design of Systematic Rateless Codes
Source: Hindawi journal article supplement (doi:10.1155/2020/8068414), 2020-05-19
Supplement: f1 [file 8068414.f1.zip › supplementary files/Matlab_code_for_Figure1/BER_by_DDE/仿真结果/关键BER结果/Critical_BER_by_DDE_rate_098_dv4.txt]

µ±Ç°Êä³öÂë×ÖµÄÂëÂÊ=0.98000,dv=4,dc=200
ÖÆ±í³É¹¦
µ±Ç°ÊäÈëÎóÂëÂÊ=1.00000e-03£¬¶ÔÓ¦µÄÊä³öÎóÂëÂÊ=3.27000e-09
µ±Ç°ÊäÈëÎóÂëÂÊ=2.00000e-03£¬¶ÔÓ¦µÄÊä³öÎóÂëÂÊ=1.38523e-10
µ±Ç°ÊäÈëÎóÂëÂÊ=3.00000e-03£¬¶ÔÓ¦µÄÊä³öÎóÂëÂÊ=4.44399e-08
µ±Ç°ÊäÈëÎóÂëÂÊ=4.00000e-03£¬¶ÔÓ¦µÄÊä³öÎóÂëÂÊ=2.61750e-03
ÕÒµ½µ±Ç°ÊäÈëÎóÂëÂÊÃÅÏÞ=3.00000e-03£¬¶ÔÓ¦µÄÊä³öÎóÂëÂÊ=4.44399e-08
µ±Ç°ÊäÈëÎóÂëÂÊ=3.00000e-03£¬¶ÔÓ¦µÄÊä³öÎóÂëÂÊ=4.44399e-08
µ±Ç°ÊäÈëÎóÂëÂÊ=3.10000e-03£¬¶ÔÓ¦µÄÊä³öÎóÂëÂÊ=6.56853e-10
µ±Ç°ÊäÈëÎóÂëÂÊ=3.20000e-03£¬¶ÔÓ¦µÄÊä³öÎóÂëÂÊ=9.16497e-07
µ±Ç°ÊäÈëÎóÂëÂÊ=3.30000e-03£¬¶ÔÓ¦µÄÊä³öÎóÂëÂÊ=5.60169e-07
µ±Ç°ÊäÈëÎóÂëÂÊ=3.40000e-03£¬¶ÔÓ¦µÄÊä³öÎóÂëÂÊ=7.82443e-11
µ±Ç°ÊäÈëÎóÂëÂÊ=3.50000e-03£¬¶ÔÓ¦µÄÊä³öÎóÂëÂÊ=7.39410e-08
µ±Ç°ÊäÈëÎóÂëÂÊ=3.60000e-03£¬¶ÔÓ¦µÄÊä³öÎóÂëÂÊ=5.16239e-07
µ±Ç°ÊäÈëÎóÂëÂÊ=3.70000e-03£¬¶ÔÓ¦µÄÊä³öÎóÂëÂÊ=3.37511e-08
µ±Ç°ÊäÈëÎóÂëÂÊ=3.80000e-03£¬¶ÔÓ¦µÄÊä³öÎóÂëÂÊ=3.38353e-09
µ±Ç°ÊäÈëÎóÂëÂÊ=3.90000e-03£¬¶ÔÓ¦µÄÊä³öÎóÂëÂÊ=3.26607e-09
µ±Ç°ÊäÈëÎóÂëÂÊ=4.00000e-03£¬¶ÔÓ¦µÄÊä³öÎóÂëÂÊ=2.61750e-03
ÕÒµ½µ±Ç°ÊäÈëÎóÂëÂÊÃÅÏÞ=3.90000e-03£¬¶ÔÓ¦µÄÊä³öÎóÂëÂÊ=3.26607e-09
Elapsed time is 2274.995719 seconds.
