# Supplementary material for: An Efficient Design of Systematic Rateless Codes
Source: Hindawi journal article supplement (doi:10.1155/2020/8068414), 2020-05-19
Supplement: f1 [file 8068414.f1.zip › supplementary files/Matlab_code_for_Figure1/BER_by_DDE/仿真结果/关键BER结果/Critical_BER_by_DDE_rate_098_dv5.txt]

µ±Ç°Êä³öÂë×ÖµÄÂëÂÊ=0.98000,dv=5,dc=250
ÖÆ±í³É¹¦
µ±Ç°ÊäÈëÎóÂëÂÊ=1.00000e-03£¬¶ÔÓ¦µÄÊä³öÎóÂëÂÊ=2.66691e-12
µ±Ç°ÊäÈëÎóÂëÂÊ=2.00000e-03£¬¶ÔÓ¦µÄÊä³öÎóÂëÂÊ=2.10560e-07
µ±Ç°ÊäÈëÎóÂëÂÊ=3.00000e-03£¬¶ÔÓ¦µÄÊä³öÎóÂëÂÊ=7.02666e-08
µ±Ç°ÊäÈëÎóÂëÂÊ=4.00000e-03£¬¶ÔÓ¦µÄÊä³öÎóÂëÂÊ=3.24583e-03
ÕÒµ½µ±Ç°ÊäÈëÎóÂëÂÊÃÅÏÞ=3.00000e-03£¬¶ÔÓ¦µÄÊä³öÎóÂëÂÊ=7.02666e-08
µ±Ç°ÊäÈëÎóÂëÂÊ=3.00000e-03£¬¶ÔÓ¦µÄÊä³öÎóÂëÂÊ=7.02666e-08
µ±Ç°ÊäÈëÎóÂëÂÊ=3.10000e-03£¬¶ÔÓ¦µÄÊä³öÎóÂëÂÊ=1.16575e-08
µ±Ç°ÊäÈëÎóÂëÂÊ=3.20000e-03£¬¶ÔÓ¦µÄÊä³öÎóÂëÂÊ=4.55561e-08
µ±Ç°ÊäÈëÎóÂëÂÊ=3.30000e-03£¬¶ÔÓ¦µÄÊä³öÎóÂëÂÊ=1.59770e-11
µ±Ç°ÊäÈëÎóÂëÂÊ=3.40000e-03£¬¶ÔÓ¦µÄÊä³öÎóÂëÂÊ=3.39422e-09
µ±Ç°ÊäÈëÎóÂëÂÊ=3.50000e-03£¬¶ÔÓ¦µÄÊä³öÎóÂëÂÊ=1.03002e-08
µ±Ç°ÊäÈëÎóÂëÂÊ=3.60000e-03£¬¶ÔÓ¦µÄÊä³öÎóÂëÂÊ=7.38321e-08
µ±Ç°ÊäÈëÎóÂëÂÊ=3.70000e-03£¬¶ÔÓ¦µÄÊä³öÎóÂëÂÊ=2.49025e-03
ÕÒµ½µ±Ç°ÊäÈëÎóÂëÂÊÃÅÏÞ=3.60000e-03£¬¶ÔÓ¦µÄÊä³öÎóÂëÂÊ=7.38321e-08
Elapsed time is 2339.934470 seconds.
