# Supplementary material for: An Efficient Design of Systematic Rateless Codes
Source: Hindawi journal article supplement (doi:10.1155/2020/8068414), 2020-05-19
Supplement: f1 [file 8068414.f1.zip › supplementary files/Matlab_code_for_Figure1/BER_by_DDE/仿真结果/固定符号信噪比变码率比较/BER_by_DDE_rician_sigma2_1_dist0_Ns.txt]

µ±Ç°ÐÅµÀÎªÀµË¹ÐÅµÀ£¬²ÎÊýgamma=2

inner_code_rate =

  1 ÖÁ 5 ÁÐ

   1.000000000000000   0.909090909090909   0.833333333333333   0.769230769230769   0.714285714285714

  6 ÖÁ 10 ÁÐ

   0.666666666666667   0.625000000000000   0.588235294117647   0.555555555555556   0.526315789473684

  11 ÖÁ 15 ÁÐ

   0.500000000000000   0.476190476190476   0.454545454545455   0.434782608695652   0.416666666666667

  16 ÖÁ 20 ÁÐ

   0.400000000000000   0.384615384615385   0.370370370370370   0.357142857142857   0.344827586206897

  21 ÁÐ

   0.333333333333333


code_rate_vec =

  1 ÖÁ 5 ÁÐ

   0.980392156862745   0.891265597147950   0.816993464052288   0.754147812971342   0.700280112044818

  6 ÖÁ 10 ÁÐ

   0.653594771241830   0.612745098039216   0.576701268742791   0.544662309368192   0.515995872033024

  11 ÖÁ 15 ÁÐ

   0.490196078431373   0.466853408029879   0.445632798573975   0.426257459505541   0.408496732026144

  16 ÖÁ 20 ÁÐ

   0.392156862745098   0.377073906485671   0.363108206245461   0.350140056022409   0.338066260987153

  21 ÁÐ

   0.326797385620915


sigma2 =

     1


EsN0indB =

  -3.010299956639812


EbN0indB_vec =

  1 ÖÁ 5 ÁÐ

  -2.924298239020637  -2.510371387438386  -2.132485778544388  -1.784864715952268  -1.463017882238256

  6 ÖÁ 10 ÁÐ

  -1.163385648463823  -0.883098412461388  -0.619809025237896  -0.371573187987575  -0.136762229492346

  11 ÖÁ 15 ÁÐ

   0.086001717619176   0.297894708318557   0.499928569201426   0.692980121155292   0.877814178095424

  16 ÖÁ 20 ÁÐ

   1.055101847699740   1.225435240687544   1.389339402569238   1.547282074401556   1.699681739968925

  21 ÁÐ

   1.846914308175989


distr_num =

     0

ÖÆ±í³É¹¦
µ±Ç°Ñ¡ÔñRaptorÂë
µ±Ç°Ñ¡Ôñ·ÇÏµÍ³Âë

out_node_index =

     1     2     3     4     5     8     9    19    65    66


ans =

  1 ÖÁ 5 ÁÐ

   0.007969000000000   0.493570000000000   0.166220000000000   0.072646000000000   0.082558000000000

  6 ÖÁ 10 ÁÐ

   0.056058000000000   0.037229000000000   0.055590000000000   0.025023000000000   0.003135000000000


inner_code_BER =

  1 ÖÁ 5 ÁÐ

   0.493907585852353                   0                   0                   0                   0

  6 ÖÁ 10 ÁÐ

                   0                   0                   0                   0                   0

  11 ÖÁ 15 ÁÐ

                   0                   0                   0                   0                   0

  16 ÖÁ 20 ÁÐ

                   0                   0                   0                   0                   0

  21 ÁÐ

                   0


outer_code_BER =

  1 ÖÁ 5 ÁÐ

   0.493907585852354                   0                   0                   0                   0

  6 ÖÁ 10 ÁÐ

                   0                   0                   0                   0                   0

  11 ÖÁ 15 ÁÐ

                   0                   0                   0                   0                   0

  16 ÖÁ 20 ÁÐ

                   0                   0                   0                   0                   0

  21 ÁÐ

                   0


inner_code_BER =

  1 ÖÁ 5 ÁÐ

   0.493907585852353   0.492198533608137                   0                   0                   0

  6 ÖÁ 10 ÁÐ

                   0                   0                   0                   0                   0

  11 ÖÁ 15 ÁÐ

                   0                   0                   0                   0                   0

  16 ÖÁ 20 ÁÐ

                   0                   0                   0                   0                   0

  21 ÁÐ

                   0


outer_code_BER =

  1 ÖÁ 5 ÁÐ

   0.493907585852354   0.492198533608138                   0                   0                   0

  6 ÖÁ 10 ÁÐ

                   0                   0                   0                   0                   0

  11 ÖÁ 15 ÁÐ

                   0                   0                   0                   0                   0

  16 ÖÁ 20 ÁÐ

                   0                   0                   0                   0                   0

  21 ÁÐ

                   0


inner_code_BER =

  1 ÖÁ 5 ÁÐ

   0.493907585852353   0.492198533608137   0.489904096369359                   0                   0

  6 ÖÁ 10 ÁÐ

                   0                   0                   0                   0                   0

  11 ÖÁ 15 ÁÐ

                   0                   0                   0                   0                   0

  16 ÖÁ 20 ÁÐ

                   0                   0                   0                   0                   0

  21 ÁÐ

                   0


outer_code_BER =

  1 ÖÁ 5 ÁÐ

   0.493907585852354   0.492198533608138   0.489904096369359                   0                   0

  6 ÖÁ 10 ÁÐ

                   0                   0                   0                   0                   0

  11 ÖÁ 15 ÁÐ

                   0                   0                   0                   0                   0

  16 ÖÁ 20 ÁÐ

                   0                   0                   0                   0                   0

  21 ÁÐ

                   0


inner_code_BER =

  1 ÖÁ 5 ÁÐ

   0.493907585852353   0.492198533608137   0.489904096369359   0.486783118037188                   0

  6 ÖÁ 10 ÁÐ

                   0                   0                   0                   0                   0

  11 ÖÁ 15 ÁÐ

                   0                   0                   0                   0                   0

  16 ÖÁ 20 ÁÐ

                   0                   0                   0                   0                   0

  21 ÁÐ

                   0


outer_code_BER =

  1 ÖÁ 5 ÁÐ

   0.493907585852354   0.492198533608138   0.489904096369359   0.486783118037189                   0

  6 ÖÁ 10 ÁÐ

                   0                   0                   0                   0                   0

  11 ÖÁ 15 ÁÐ

                   0                   0                   0                   0                   0

  16 ÖÁ 20 ÁÐ

                   0                   0                   0                   0                   0

  21 ÁÐ

                   0


inner_code_BER =

  1 ÖÁ 5 ÁÐ

   0.493907585852353   0.492198533608137   0.489904096369359   0.486783118037188   0.482531625689519

  6 ÖÁ 10 ÁÐ

                   0                   0                   0                   0                   0

  11 ÖÁ 15 ÁÐ

                   0                   0                   0                   0                   0

  16 ÖÁ 20 ÁÐ

                   0                   0                   0                   0                   0

  21 ÁÐ

                   0


outer_code_BER =

  1 ÖÁ 3 ÁÐ

   0.493907585852354   0.492198533608138   0.489904096369359

  4 ÖÁ 6 ÁÐ

   0.486783118037189   0.482531625689520                   0

  7 ÖÁ 9 ÁÐ

                   0                   0                   0

  10 ÖÁ 12 ÁÐ

                   0                   0                   0

  13 ÖÁ 15 ÁÐ

                   0                   0                   0

  16 ÖÁ 18 ÁÐ

                   0                   0                   0

  19 ÖÁ 21 ÁÐ

                   0                   0                   0


inner_code_BER =

  1 ÖÁ 5 ÁÐ

   0.493907585852353   0.492198533608137   0.489904096369359   0.486783118037188   0.482531625689519

  6 ÖÁ 10 ÁÐ

   0.476793232685481                   0                   0                   0                   0

  11 ÖÁ 15 ÁÐ

                   0                   0                   0                   0                   0

  16 ÖÁ 20 ÁÐ

                   0                   0                   0                   0                   0

  21 ÁÐ

                   0


outer_code_BER =

  1 ÖÁ 5 ÁÐ

   0.493907585852354   0.492198533608138   0.489904096369359   0.486783118037189   0.482531625689520

  6 ÖÁ 10 ÁÐ

   0.476793232685481                   0                   0                   0                   0

  11 ÖÁ 15 ÁÐ

                   0                   0                   0                   0                   0

  16 ÖÁ 20 ÁÐ

                   0                   0                   0                   0                   0

  21 ÁÐ

                   0


inner_code_BER =

  1 ÖÁ 5 ÁÐ

   0.493907585852353   0.492198533608137   0.489904096369359   0.486783118037188   0.482531625689519

  6 ÖÁ 10 ÁÐ

   0.476793232685481   0.469131333867992                   0                   0                   0

  11 ÖÁ 15 ÁÐ

                   0                   0                   0                   0                   0

  16 ÖÁ 20 ÁÐ

                   0                   0                   0                   0                   0

  21 ÁÐ

                   0


outer_code_BER =

  1 ÖÁ 5 ÁÐ

   0.493907585852354   0.492198533608138   0.489904096369359   0.486783118037189   0.482531625689520

  6 ÖÁ 10 ÁÐ

   0.476793232685481   0.469131333867993                   0                   0                   0

  11 ÖÁ 15 ÁÐ

                   0                   0                   0                   0                   0

  16 ÖÁ 20 ÁÐ

                   0                   0                   0                   0                   0

  21 ÁÐ

                   0


inner_code_BER =

  1 ÖÁ 5 ÁÐ

   0.493907585852353   0.492198533608137   0.489904096369359   0.486783118037188   0.482531625689519

  6 ÖÁ 10 ÁÐ

   0.476793232685481   0.469131333867992   0.458915825883971                   0                   0

  11 ÖÁ 15 ÁÐ

                   0                   0                   0                   0                   0

  16 ÖÁ 20 ÁÐ

                   0                   0                   0                   0                   0

  21 ÁÐ

                   0


outer_code_BER =

  1 ÖÁ 5 ÁÐ

   0.493907585852354   0.492198533608138   0.489904096369359   0.486783118037189   0.482531625689520

  6 ÖÁ 10 ÁÐ

   0.476793232685481   0.469131333867993   0.458915825883972                   0                   0

  11 ÖÁ 15 ÁÐ

                   0                   0                   0                   0                   0

  16 ÖÁ 20 ÁÐ

                   0                   0                   0                   0                   0

  21 ÁÐ

                   0


inner_code_BER =

  1 ÖÁ 5 ÁÐ

   0.493907585852353   0.492198533608137   0.489904096369359   0.486783118037188   0.482531625689519

  6 ÖÁ 10 ÁÐ

   0.476793232685481   0.469131333867992   0.458915825883971   0.445026855003545                   0

  11 ÖÁ 15 ÁÐ

                   0                   0                   0                   0                   0

  16 ÖÁ 20 ÁÐ

                   0                   0                   0                   0                   0

  21 ÁÐ

                   0


outer_code_BER =

  1 ÖÁ 5 ÁÐ

   0.493907585852354   0.492198533608138   0.489904096369359   0.486783118037189   0.482531625689520

  6 ÖÁ 10 ÁÐ

   0.476793232685481   0.469131333867993   0.458915825883972   0.445026855003544                   0

  11 ÖÁ 15 ÁÐ

                   0                   0                   0                   0                   0

  16 ÖÁ 20 ÁÐ

                   0                   0                   0                   0                   0

  21 ÁÐ

                   0


inner_code_BER =

  1 ÖÁ 5 ÁÐ

   0.493907585852353   0.492198533608137   0.489904096369359   0.486783118037188   0.482531625689519

  6 ÖÁ 10 ÁÐ

   0.476793232685481   0.469131333867992   0.458915825883971   0.445026855003545   0.425122992411695

  11 ÖÁ 15 ÁÐ

                   0                   0                   0                   0                   0

  16 ÖÁ 20 ÁÐ

                   0                   0                   0                   0                   0

  21 ÁÐ

                   0


outer_code_BER =

  1 ÖÁ 5 ÁÐ

   0.493907585852354   0.492198533608138   0.489904096369359   0.486783118037189   0.482531625689520

  6 ÖÁ 10 ÁÐ

   0.476793232685481   0.469131333867993   0.458915825883972   0.445026855003544   0.425122992411695

  11 ÖÁ 15 ÁÐ

                   0                   0                   0                   0                   0

  16 ÖÁ 20 ÁÐ

                   0                   0                   0                   0                   0

  21 ÁÐ

                   0


inner_code_BER =

  1 ÖÁ 5 ÁÐ

   0.493907585852353   0.492198533608137   0.489904096369359   0.486783118037188   0.482531625689519

  6 ÖÁ 10 ÁÐ

   0.476793232685481   0.469131333867992   0.458915825883971   0.445026855003545   0.425122992411695

  11 ÖÁ 15 ÁÐ

   0.393659406056263                   0                   0                   0                   0

  16 ÖÁ 20 ÁÐ

                   0                   0                   0                   0                   0

  21 ÁÐ

                   0


outer_code_BER =

  1 ÖÁ 5 ÁÐ

   0.493907585852354   0.492198533608138   0.489904096369359   0.486783118037189   0.482531625689520

  6 ÖÁ 10 ÁÐ

   0.476793232685481   0.469131333867993   0.458915825883972   0.445026855003544   0.425122992411695

  11 ÖÁ 15 ÁÐ

   0.393659406056264                   0                   0                   0                   0

  16 ÖÁ 20 ÁÐ

                   0                   0                   0                   0                   0

  21 ÁÐ

                   0


inner_code_BER =

  1 ÖÁ 5 ÁÐ

   0.493907585852353   0.492198533608137   0.489904096369359   0.486783118037188   0.482531625689519

  6 ÖÁ 10 ÁÐ

   0.476793232685481   0.469131333867992   0.458915825883971   0.445026855003545   0.425122992411695

  11 ÖÁ 15 ÁÐ

   0.393659406056263   0.336873905963812                   0                   0                   0

  16 ÖÁ 20 ÁÐ

                   0                   0                   0                   0                   0

  21 ÁÐ

                   0


outer_code_BER =

  1 ÖÁ 5 ÁÐ

   0.493907585852354   0.492198533608138   0.489904096369359   0.486783118037189   0.482531625689520

  6 ÖÁ 10 ÁÐ

   0.476793232685481   0.469131333867993   0.458915825883972   0.445026855003544   0.425122992411695

  11 ÖÁ 15 ÁÐ

   0.393659406056264   0.336873905963812                   0                   0                   0

  16 ÖÁ 20 ÁÐ

                   0                   0                   0                   0                   0

  21 ÁÐ

                   0


inner_code_BER =

  1 ÖÁ 5 ÁÐ

   0.493907585852353   0.492198533608137   0.489904096369359   0.486783118037188   0.482531625689519

  6 ÖÁ 10 ÁÐ

   0.476793232685481   0.469131333867992   0.458915825883971   0.445026855003545   0.425122992411695

  11 ÖÁ 15 ÁÐ

   0.393659406056263   0.336873905963812   0.231985875771787                   0                   0

  16 ÖÁ 20 ÁÐ

                   0                   0                   0                   0                   0

  21 ÁÐ

                   0


outer_code_BER =

  1 ÖÁ 5 ÁÐ

   0.493907585852354   0.492198533608138   0.489904096369359   0.486783118037189   0.482531625689520

  6 ÖÁ 10 ÁÐ

   0.476793232685481   0.469131333867993   0.458915825883972   0.445026855003544   0.425122992411695

  11 ÖÁ 15 ÁÐ

   0.393659406056264   0.336873905963812   0.231985875771787                   0                   0

  16 ÖÁ 20 ÁÐ

                   0                   0                   0                   0                   0

  21 ÁÐ

                   0


inner_code_BER =

  1 ÖÁ 5 ÁÐ

   0.493907585852353   0.492198533608137   0.489904096369359   0.486783118037188   0.482531625689519

  6 ÖÁ 10 ÁÐ

   0.476793232685481   0.469131333867992   0.458915825883971   0.445026855003545   0.425122992411695

  11 ÖÁ 15 ÁÐ

   0.393659406056263   0.336873905963812   0.231985875771787   0.097332380330249                   0

  16 ÖÁ 20 ÁÐ

                   0                   0                   0                   0                   0

  21 ÁÐ

                   0


outer_code_BER =

  1 ÖÁ 5 ÁÐ

   0.493907585852354   0.492198533608138   0.489904096369359   0.486783118037189   0.482531625689520

  6 ÖÁ 10 ÁÐ

   0.476793232685481   0.469131333867993   0.458915825883972   0.445026855003544   0.425122992411695

  11 ÖÁ 15 ÁÐ

   0.393659406056264   0.336873905963812   0.231985875771787   0.097332380330250                   0

  16 ÖÁ 20 ÁÐ

                   0                   0                   0                   0                   0

  21 ÁÐ

                   0


inner_code_BER =

  1 ÖÁ 5 ÁÐ

   0.493907585852353   0.492198533608137   0.489904096369359   0.486783118037188   0.482531625689519

  6 ÖÁ 10 ÁÐ

   0.476793232685481   0.469131333867992   0.458915825883971   0.445026855003545   0.425122992411695

  11 ÖÁ 15 ÁÐ

   0.393659406056263   0.336873905963812   0.231985875771787   0.097332380330249   0.002888589755416

  16 ÖÁ 20 ÁÐ

                   0                   0                   0                   0                   0

  21 ÁÐ

                   0


outer_code_BER =

  1 ÖÁ 5 ÁÐ

   0.493907585852354   0.492198533608138   0.489904096369359   0.486783118037189   0.482531625689520

  6 ÖÁ 10 ÁÐ

   0.476793232685481   0.469131333867993   0.458915825883972   0.445026855003544   0.425122992411695

  11 ÖÁ 15 ÁÐ

   0.393659406056264   0.336873905963812   0.231985875771787   0.097332380330250   0.000000061532091

  16 ÖÁ 20 ÁÐ

                   0                   0                   0                   0                   0

  21 ÁÐ

                   0

µ±Ç°ÍâÂëÎóÂëÂÊÒÑµÍÓÚÄ¿±êÎóÂëÂÊ£¬×ÜÂëÂÊÎª0.41 dB

inner_code_BER =

  1 ÖÁ 5 ÁÐ

   0.493907585852353   0.492198533608137   0.489904096369359   0.486783118037188   0.482531625689519

  6 ÖÁ 10 ÁÐ

   0.476793232685481   0.469131333867992   0.458915825883971   0.445026855003545   0.425122992411695

  11 ÖÁ 15 ÁÐ

   0.393659406056263   0.336873905963812   0.231985875771787   0.097332380330249   0.002888589755416

  16 ÖÁ 20 ÁÐ

   0.001517420151034                   0                   0                   0                   0

  21 ÁÐ

                   0


inner_code_BER =

  1 ÖÁ 5 ÁÐ

   0.493907585852353   0.492198533608137   0.489904096369359   0.486783118037188   0.482531625689519

  6 ÖÁ 10 ÁÐ

   0.476793232685481   0.469131333867992   0.458915825883971   0.445026855003545   0.425122992411695

  11 ÖÁ 15 ÁÐ

   0.393659406056263   0.336873905963812   0.231985875771787   0.097332380330249   0.002888589755416

  16 ÖÁ 20 ÁÐ

   0.001517420151034   0.000997350018529                   0                   0                   0

  21 ÁÐ

                   0


inner_code_BER =

  1 ÖÁ 5 ÁÐ

   0.493907585852353   0.492198533608137   0.489904096369359   0.486783118037188   0.482531625689519

  6 ÖÁ 10 ÁÐ

   0.476793232685481   0.469131333867992   0.458915825883971   0.445026855003545   0.425122992411695

  11 ÖÁ 15 ÁÐ

   0.393659406056263   0.336873905963812   0.231985875771787   0.097332380330249   0.002888589755416

  16 ÖÁ 20 ÁÐ

   0.001517420151034   0.000997350018529   0.000703939460976                   0                   0

  21 ÁÐ

                   0


inner_code_BER =

  1 ÖÁ 5 ÁÐ

   0.493907585852353   0.492198533608137   0.489904096369359   0.486783118037188   0.482531625689519

  6 ÖÁ 10 ÁÐ

   0.476793232685481   0.469131333867992   0.458915825883971   0.445026855003545   0.425122992411695

  11 ÖÁ 15 ÁÐ

   0.393659406056263   0.336873905963812   0.231985875771787   0.097332380330249   0.002888589755416

  16 ÖÁ 20 ÁÐ

   0.001517420151034   0.000997350018529   0.000703939460976   0.000515651817093                   0

  21 ÁÐ

                   0


inner_code_BER =

  1 ÖÁ 5 ÁÐ

   0.493907585852353   0.492198533608137   0.489904096369359   0.486783118037188   0.482531625689519

  6 ÖÁ 10 ÁÐ

   0.476793232685481   0.469131333867992   0.458915825883971   0.445026855003545   0.425122992411695

  11 ÖÁ 15 ÁÐ

   0.393659406056263   0.336873905963812   0.231985875771787   0.097332380330249   0.002888589755416

  16 ÖÁ 20 ÁÐ

   0.001517420151034   0.000997350018529   0.000703939460976   0.000515651817093   0.000386523295367

  21 ÁÐ

                   0


inner_code_BER =

  1 ÖÁ 5 ÁÐ

   0.493907585852353   0.492198533608137   0.489904096369359   0.486783118037188   0.482531625689519

  6 ÖÁ 10 ÁÐ

   0.476793232685481   0.469131333867992   0.458915825883971   0.445026855003545   0.425122992411695

  11 ÖÁ 15 ÁÐ

   0.393659406056263   0.336873905963812   0.231985875771787   0.097332380330249   0.002888589755416

  16 ÖÁ 20 ÁÐ

   0.001517420151034   0.000997350018529   0.000703939460976   0.000515651817093   0.000386523295367

  21 ÁÐ

   0.000294291883378

Ê±¼äÒÑ¹ý 9628.434440 Ãë¡£
