# Supplementary material for: An Efficient Design of Systematic Rateless Codes
Source: Hindawi journal article supplement (doi:10.1155/2020/8068414), 2020-05-19
Supplement: f1 [file 8068414.f1.zip › supplementary files/Matlab_code_for_Figure1/BER_by_DDE/仿真结果/固定符号信噪比变码率比较/BER_by_DDE_rician_sigma2_1_dist0_Ns_v1.txt]

µ±Ç°ÐÅµÀÎªÀµË¹ÐÅµÀ£¬²ÎÊýgamma=2

inner_code_rate =

  1 ÖÁ 5 ÁÐ

   0.432900432900433   0.431034482758621   0.429184549356223   0.427350427350427   0.425531914893617

  6 ÖÁ 10 ÁÐ

   0.423728813559322   0.421940928270042   0.420168067226891   0.418410041841004   0.416666666666667


code_rate_vec =

  1 ÖÁ 5 ÁÐ

   0.424412189118071   0.422582826233942   0.420769166035513   0.418971007206301   0.417188151856487

  6 ÖÁ 10 ÁÐ

   0.415420405450316   0.413667576735335   0.411929477673422   0.410205923373533   0.408496732026144


sigma2 =

     1


EsN0indB =

  -3.010299956639812


EbN0indB_vec =

  1 ÖÁ 5 ÁÐ

   0.711821559900807   0.730581609888360   0.749260971239554   0.767860335080792   0.786380383696726

  6 ÖÁ 10 ÁÐ

   0.804821790680429   0.823185221080403   0.841471331544483   0.859680770460741   0.877814178095424


distr_num =

     0

ÖÆ±í³É¹¦
µ±Ç°Ñ¡ÔñRaptorÂë
µ±Ç°Ñ¡Ôñ·ÇÏµÍ³Âë

out_node_index =

     1     2     3     4     5     8     9    19    65    66


ans =

  1 ÖÁ 5 ÁÐ

   0.007969000000000   0.493570000000000   0.166220000000000   0.072646000000000   0.082558000000000

  6 ÖÁ 10 ÁÐ

   0.056058000000000   0.037229000000000   0.055590000000000   0.025023000000000   0.003135000000000


inner_code_BER =

  1 ÖÁ 5 ÁÐ

   0.085515493189344                   0                   0                   0                   0

  6 ÖÁ 10 ÁÐ

                   0                   0                   0                   0                   0


outer_code_BER =

  1 ÖÁ 5 ÁÐ

   0.085515493189344                   0                   0                   0                   0

  6 ÖÁ 10 ÁÐ

                   0                   0                   0                   0                   0


inner_code_BER =

  1 ÖÁ 5 ÁÐ

   0.085515493189344   0.074178675484180                   0                   0                   0

  6 ÖÁ 10 ÁÐ

                   0                   0                   0                   0                   0


outer_code_BER =

  1 ÖÁ 5 ÁÐ

   0.085515493189344   0.074178675484193                   0                   0                   0

  6 ÖÁ 10 ÁÐ

                   0                   0                   0                   0                   0


inner_code_BER =

  1 ÖÁ 5 ÁÐ

   0.085515493189344   0.074178675484180   0.063174666371207                   0                   0

  6 ÖÁ 10 ÁÐ

                   0                   0                   0                   0                   0


outer_code_BER =

  1 ÖÁ 5 ÁÐ

   0.085515493189344   0.074178675484193   0.063174666372018                   0                   0

  6 ÖÁ 10 ÁÐ

                   0                   0                   0                   0                   0


inner_code_BER =

  1 ÖÁ 5 ÁÐ

   0.085515493189344   0.074178675484180   0.063174666371207   0.052460967127376                   0

  6 ÖÁ 10 ÁÐ

                   0                   0                   0                   0                   0


outer_code_BER =

  1 ÖÁ 5 ÁÐ

   0.085515493189344   0.074178675484193   0.063174666372018   0.052460967165290                   0

  6 ÖÁ 10 ÁÐ

                   0                   0                   0                   0                   0


inner_code_BER =

  1 ÖÁ 5 ÁÐ

   0.085515493189344   0.074178675484180   0.063174666371207   0.052460967127376   0.042453278172661

  6 ÖÁ 10 ÁÐ

                   0                   0                   0                   0                   0


outer_code_BER =

  1 ÖÁ 5 ÁÐ

   0.085515493189344   0.074178675484193   0.063174666372018   0.052460967165290   0.042453279251763

  6 ÖÁ 10 ÁÐ

                   0                   0                   0                   0                   0


inner_code_BER =

  1 ÖÁ 5 ÁÐ

   0.085515493189344   0.074178675484180   0.063174666371207   0.052460967127376   0.042453278172661

  6 ÖÁ 10 ÁÐ

   0.034013340326153                   0                   0                   0                   0


outer_code_BER =

  1 ÖÁ 5 ÁÐ

   0.085515493189344   0.074178675484193   0.063174666372018   0.052460967165290   0.042453279251763

  6 ÖÁ 10 ÁÐ

   0.034013355006631                   0                   0                   0                   0


inner_code_BER =

  1 ÖÁ 5 ÁÐ

   0.085515493189344   0.074178675484180   0.063174666371207   0.052460967127376   0.042453278172661

  6 ÖÁ 10 ÁÐ

   0.034013340326153   0.027321942019291                   0                   0                   0


outer_code_BER =

  1 ÖÁ 5 ÁÐ

   0.085515493189344   0.074178675484193   0.063174666372018   0.052460967165290   0.042453279251763

  6 ÖÁ 10 ÁÐ

   0.034013355006631   0.027322037192137                   0                   0                   0


inner_code_BER =

  1 ÖÁ 5 ÁÐ

   0.085515493189344   0.074178675484180   0.063174666371207   0.052460967127376   0.042453278172661

  6 ÖÁ 10 ÁÐ

   0.034013340326153   0.027321942019291   0.021561027468864                   0                   0


outer_code_BER =

  1 ÖÁ 5 ÁÐ

   0.085515493189344   0.074178675484193   0.063174666372018   0.052460967165290   0.042453279251763

  6 ÖÁ 10 ÁÐ

   0.034013355006631   0.027322037192137   0.021561372726530                   0                   0


inner_code_BER =

  1 ÖÁ 5 ÁÐ

   0.085515493189344   0.074178675484180   0.063174666371207   0.052460967127376   0.042453278172661

  6 ÖÁ 10 ÁÐ

   0.034013340326153   0.027321942019291   0.021561027468864   0.014111606536511                   0


outer_code_BER =

  1 ÖÁ 5 ÁÐ

   0.085515493189344   0.074178675484193   0.063174666372018   0.052460967165290   0.042453279251763

  6 ÖÁ 10 ÁÐ

   0.034013355006631   0.027322037192137   0.021561372726530   0.014108975197111                   0


inner_code_BER =

  1 ÖÁ 5 ÁÐ

   0.085515493189344   0.074178675484180   0.063174666371207   0.052460967127376   0.042453278172661

  6 ÖÁ 10 ÁÐ

   0.034013340326153   0.027321942019291   0.021561027468864   0.014111606536511   0.002888589755416


outer_code_BER =

  1 ÖÁ 5 ÁÐ

   0.085515493189344   0.074178675484193   0.063174666372018   0.052460967165290   0.042453279251763

  6 ÖÁ 10 ÁÐ

   0.034013355006631   0.027322037192137   0.021561372726530   0.014108975197111   0.000000061532091

µ±Ç°ÍâÂëÎóÂëÂÊÒÑµÍÓÚÄ¿±êÎóÂëÂÊ£¬×ÜÂëÂÊÎª0.41 dB
Ê±¼äÒÑ¹ý 6188.566755 Ãë¡£
