# Supplementary material for: An Efficient Design of Systematic Rateless Codes
Source: Hindawi journal article supplement (doi:10.1155/2020/8068414), 2020-05-19
Supplement: f1 [file 8068414.f1.zip › supplementary files/Matlab_code_for_Figure1/BER_by_DDE/仿真结果/固定符号信噪比变码率比较/BER_by_DDE_rician_sigma2_1_dist0_s.txt]

µ±Ç°ÐÅµÀÎªÀµË¹ÐÅµÀ£¬²ÎÊýr_gamma=2

inner_code_rate =

  1 ÖÁ 5 ÁÐ

   0.500000000000000   0.476190476190476   0.454545454545455   0.434782608695652   0.416666666666667

  6 ÖÁ 10 ÁÐ

   0.400000000000000   0.384615384615385   0.370370370370370   0.357142857142857   0.344827586206897

  11 ÖÁ 15 ÁÐ

   0.333333333333333   0.322580645161290   0.312500000000000   0.303030303030303   0.294117647058824

  16 ÖÁ 20 ÁÐ

   0.285714285714286   0.277777777777778   0.270270270270270   0.263157894736842   0.256410256410256

  21 ÁÐ

   0.250000000000000


code_rate_vec =

  1 ÖÁ 5 ÁÐ

   0.490196078431373   0.466853408029879   0.445632798573975   0.426257459505541   0.408496732026144

  6 ÖÁ 10 ÁÐ

   0.392156862745098   0.377073906485671   0.363108206245461   0.350140056022409   0.338066260987153

  11 ÖÁ 15 ÁÐ

   0.326797385620915   0.316255534471853   0.306372549019608   0.297088532382650   0.288350634371396

  16 ÖÁ 20 ÁÐ

   0.280112044817927   0.272331154684096   0.264970853206147   0.257997936016512   0.251382604323781

  21 ÁÐ

   0.245098039215686


sigma2 =

     1


EsN0indB =

  -3.010299956639812


EbN0indB_vec =

  1 ÖÁ 5 ÁÐ

   0.086001717619176   0.297894708318557   0.499928569201426   0.692980121155292   0.877814178095424

  6 ÖÁ 10 ÁÐ

   1.055101847699740   1.225435240687544   1.389339402569238   1.547282074401556   1.699681739968925

  11 ÖÁ 15 ÁÐ

   1.846914308175989   1.989318699322091   2.127201544178424   2.260841159758238   2.390490931401915

  16 ÖÁ 20 ÁÐ

   2.516382204482121   2.638726768652236   2.757719001649315   2.873537727147466   2.986347831244356

  21 ÁÐ

   3.096301674258988


distr_num =

     0

ÖÆ±í³É¹¦
µ±Ç°Ñ¡ÔñRaptorÂë
µ±Ç°Ñ¡ÔñÏµÍ³Âë

out_node_index =

     1     2     3     4     5     8     9    19    65    66


ans =

  1 ÖÁ 5 ÁÐ

   0.007969000000000   0.493570000000000   0.166220000000000   0.072646000000000   0.082558000000000

  6 ÖÁ 10 ÁÐ

   0.056058000000000   0.037229000000000   0.055590000000000   0.025023000000000   0.003135000000000


inner_code_BER =

  1 ÖÁ 5 ÁÐ

   0.116118422838785                   0                   0                   0                   0

  6 ÖÁ 10 ÁÐ

                   0                   0                   0                   0                   0

  11 ÖÁ 15 ÁÐ

                   0                   0                   0                   0                   0

  16 ÖÁ 20 ÁÐ

                   0                   0                   0                   0                   0

  21 ÁÐ

                   0


outer_code_BER =

  1 ÖÁ 5 ÁÐ

   0.116118422838785                   0                   0                   0                   0

  6 ÖÁ 10 ÁÐ

                   0                   0                   0                   0                   0

  11 ÖÁ 15 ÁÐ

                   0                   0                   0                   0                   0

  16 ÖÁ 20 ÁÐ

                   0                   0                   0                   0                   0

  21 ÁÐ

                   0


inner_code_BER =

  1 ÖÁ 5 ÁÐ

   0.116118422838785   0.106398623278045                   0                   0                   0

  6 ÖÁ 10 ÁÐ

                   0                   0                   0                   0                   0

  11 ÖÁ 15 ÁÐ

                   0                   0                   0                   0                   0

  16 ÖÁ 20 ÁÐ

                   0                   0                   0                   0                   0

  21 ÁÐ

                   0


outer_code_BER =

  1 ÖÁ 5 ÁÐ

   0.116118422838785   0.106398623278046                   0                   0                   0

  6 ÖÁ 10 ÁÐ

                   0                   0                   0                   0                   0

  11 ÖÁ 15 ÁÐ

                   0                   0                   0                   0                   0

  16 ÖÁ 20 ÁÐ

                   0                   0                   0                   0                   0

  21 ÁÐ

                   0


inner_code_BER =

  1 ÖÁ 5 ÁÐ

   0.116118422838785   0.106398623278045   0.096252061682941                   0                   0

  6 ÖÁ 10 ÁÐ

                   0                   0                   0                   0                   0

  11 ÖÁ 15 ÁÐ

                   0                   0                   0                   0                   0

  16 ÖÁ 20 ÁÐ

                   0                   0                   0                   0                   0

  21 ÁÐ

                   0


outer_code_BER =

  1 ÖÁ 5 ÁÐ

   0.116118422838785   0.106398623278046   0.096252061682942                   0                   0

  6 ÖÁ 10 ÁÐ

                   0                   0                   0                   0                   0

  11 ÖÁ 15 ÁÐ

                   0                   0                   0                   0                   0

  16 ÖÁ 20 ÁÐ

                   0                   0                   0                   0                   0

  21 ÁÐ

                   0


inner_code_BER =

  1 ÖÁ 5 ÁÐ

   0.116118422838785   0.106398623278045   0.096252061682941   0.085705573968800                   0

  6 ÖÁ 10 ÁÐ

                   0                   0                   0                   0                   0

  11 ÖÁ 15 ÁÐ

                   0                   0                   0                   0                   0

  16 ÖÁ 20 ÁÐ

                   0                   0                   0                   0                   0

  21 ÁÐ

                   0


outer_code_BER =

  1 ÖÁ 5 ÁÐ

   0.116118422838785   0.106398623278046   0.096252061682942   0.085705573968799                   0

  6 ÖÁ 10 ÁÐ

                   0                   0                   0                   0                   0

  11 ÖÁ 15 ÁÐ

                   0                   0                   0                   0                   0

  16 ÖÁ 20 ÁÐ

                   0                   0                   0                   0                   0

  21 ÁÐ

                   0


inner_code_BER =

  1 ÖÁ 5 ÁÐ

   0.116118422838785   0.106398623278045   0.096252061682941   0.085705573968800   0.074798090702846

  6 ÖÁ 10 ÁÐ

                   0                   0                   0                   0                   0

  11 ÖÁ 15 ÁÐ

                   0                   0                   0                   0                   0

  16 ÖÁ 20 ÁÐ

                   0                   0                   0                   0                   0

  21 ÁÐ

                   0


outer_code_BER =

  1 ÖÁ 5 ÁÐ

   0.116118422838785   0.106398623278046   0.096252061682942   0.085705573968799   0.074798090702860

  6 ÖÁ 10 ÁÐ

                   0                   0                   0                   0                   0

  11 ÖÁ 15 ÁÐ

                   0                   0                   0                   0                   0

  16 ÖÁ 20 ÁÐ

                   0                   0                   0                   0                   0

  21 ÁÐ

                   0


inner_code_BER =

  1 ÖÁ 5 ÁÐ

   0.116118422838785   0.106398623278045   0.096252061682941   0.085705573968800   0.074798090702846

  6 ÖÁ 10 ÁÐ

   0.063594006600790                   0                   0                   0                   0

  11 ÖÁ 15 ÁÐ

                   0                   0                   0                   0                   0

  16 ÖÁ 20 ÁÐ

                   0                   0                   0                   0                   0

  21 ÁÐ

                   0


outer_code_BER =

  1 ÖÁ 5 ÁÐ

   0.116118422838785   0.106398623278046   0.096252061682942   0.085705573968799   0.074798090702860

  6 ÖÁ 10 ÁÐ

   0.063594006601706                   0                   0                   0                   0

  11 ÖÁ 15 ÁÐ

                   0                   0                   0                   0                   0

  16 ÖÁ 20 ÁÐ

                   0                   0                   0                   0                   0

  21 ÁÐ

                   0


inner_code_BER =

  1 ÖÁ 5 ÁÐ

   0.116118422838785   0.106398623278045   0.096252061682941   0.085705573968800   0.074798090702846

  6 ÖÁ 10 ÁÐ

   0.063594006600790   0.052204934633809                   0                   0                   0

  11 ÖÁ 15 ÁÐ

                   0                   0                   0                   0                   0

  16 ÖÁ 20 ÁÐ

                   0                   0                   0                   0                   0

  21 ÁÐ

                   0


outer_code_BER =

  1 ÖÁ 5 ÁÐ

   0.116118422838785   0.106398623278046   0.096252061682942   0.085705573968799   0.074798090702860

  6 ÖÁ 10 ÁÐ

   0.063594006601706   0.052204934683844                   0                   0                   0

  11 ÖÁ 15 ÁÐ

                   0                   0                   0                   0                   0

  16 ÖÁ 20 ÁÐ

                   0                   0                   0                   0                   0

  21 ÁÐ

                   0


inner_code_BER =

  1 ÖÁ 5 ÁÐ

   0.116118422838785   0.106398623278045   0.096252061682941   0.085705573968800   0.074798090702846

  6 ÖÁ 10 ÁÐ

   0.063594006600790   0.052204934633809   0.040864212569308                   0                   0

  11 ÖÁ 15 ÁÐ

                   0                   0                   0                   0                   0

  16 ÖÁ 20 ÁÐ

                   0                   0                   0                   0                   0

  21 ÁÐ

                   0


outer_code_BER =

  1 ÖÁ 5 ÁÐ

   0.116118422838785   0.106398623278046   0.096252061682942   0.085705573968799   0.074798090702860

  6 ÖÁ 10 ÁÐ

   0.063594006601706   0.052204934683844   0.040864214575871                   0                   0

  11 ÖÁ 15 ÁÐ

                   0                   0                   0                   0                   0

  16 ÖÁ 20 ÁÐ

                   0                   0                   0                   0                   0

  21 ÁÐ

                   0


inner_code_BER =

  1 ÖÁ 5 ÁÐ

   0.116118422838785   0.106398623278045   0.096252061682941   0.085705573968800   0.074798090702846

  6 ÖÁ 10 ÁÐ

   0.063594006600790   0.052204934633809   0.040864212569308   0.030035611242445                   0

  11 ÖÁ 15 ÁÐ

                   0                   0                   0                   0                   0

  16 ÖÁ 20 ÁÐ

                   0                   0                   0                   0                   0

  21 ÁÐ

                   0


outer_code_BER =

  1 ÖÁ 5 ÁÐ

   0.116118422838785   0.106398623278046   0.096252061682942   0.085705573968799   0.074798090702860

  6 ÖÁ 10 ÁÐ

   0.063594006601706   0.052204934683844   0.040864214575871   0.030035659902980                   0

  11 ÖÁ 15 ÁÐ

                   0                   0                   0                   0                   0

  16 ÖÁ 20 ÁÐ

                   0                   0                   0                   0                   0

  21 ÁÐ

                   0


inner_code_BER =

  1 ÖÁ 5 ÁÐ

   0.116118422838785   0.106398623278045   0.096252061682941   0.085705573968800   0.074798090702846

  6 ÖÁ 10 ÁÐ

   0.063594006600790   0.052204934633809   0.040864212569308   0.030035611242445   0.020174566393633

  11 ÖÁ 15 ÁÐ

                   0                   0                   0                   0                   0

  16 ÖÁ 20 ÁÐ

                   0                   0                   0                   0                   0

  21 ÁÐ

                   0


outer_code_BER =

  1 ÖÁ 5 ÁÐ

   0.116118422838785   0.106398623278046   0.096252061682942   0.085705573968799   0.074798090702860

  6 ÖÁ 10 ÁÐ

   0.063594006601706   0.052204934683844   0.040864214575871   0.030035659902980   0.020175007338252

  11 ÖÁ 15 ÁÐ

                   0                   0                   0                   0                   0

  16 ÖÁ 20 ÁÐ

                   0                   0                   0                   0                   0

  21 ÁÐ

                   0


inner_code_BER =

  1 ÖÁ 5 ÁÐ

   0.116118422838785   0.106398623278045   0.096252061682941   0.085705573968800   0.074798090702846

  6 ÖÁ 10 ÁÐ

   0.063594006600790   0.052204934633809   0.040864212569308   0.030035611242445   0.020174566393633

  11 ÖÁ 15 ÁÐ

   0.010583705787265                   0                   0                   0                   0

  16 ÖÁ 20 ÁÐ

                   0                   0                   0                   0                   0

  21 ÁÐ

                   0


outer_code_BER =

  1 ÖÁ 5 ÁÐ

   0.116118422838785   0.106398623278046   0.096252061682942   0.085705573968799   0.074798090702860

  6 ÖÁ 10 ÁÐ

   0.063594006601706   0.052204934683844   0.040864214575871   0.030035659902980   0.020175007338252

  11 ÖÁ 15 ÁÐ

   0.010557865496243                   0                   0                   0                   0

  16 ÖÁ 20 ÁÐ

                   0                   0                   0                   0                   0

  21 ÁÐ

                   0


inner_code_BER =

  1 ÖÁ 5 ÁÐ

   0.116118422838785   0.106398623278045   0.096252061682941   0.085705573968800   0.074798090702846

  6 ÖÁ 10 ÁÐ

   0.063594006600790   0.052204934633809   0.040864212569308   0.030035611242445   0.020174566393633

  11 ÖÁ 15 ÁÐ

   0.010583705787265   0.003523873765640                   0                   0                   0

  16 ÖÁ 20 ÁÐ

                   0                   0                   0                   0                   0

  21 ÁÐ

                   0


outer_code_BER =

  1 ÖÁ 5 ÁÐ

   0.116118422838785   0.106398623278046   0.096252061682942   0.085705573968799   0.074798090702860

  6 ÖÁ 10 ÁÐ

   0.063594006601706   0.052204934683844   0.040864214575871   0.030035659902980   0.020175007338252

  11 ÖÁ 15 ÁÐ

   0.010557865496243   0.000044655611127                   0                   0                   0

  16 ÖÁ 20 ÁÐ

                   0                   0                   0                   0                   0

  21 ÁÐ

                   0


inner_code_BER =

  1 ÖÁ 5 ÁÐ

   0.116118422838785   0.106398623278045   0.096252061682941   0.085705573968800   0.074798090702846

  6 ÖÁ 10 ÁÐ

   0.063594006600790   0.052204934633809   0.040864212569308   0.030035611242445   0.020174566393633

  11 ÖÁ 15 ÁÐ

   0.010583705787265   0.003523873765640   0.001926695770412                   0                   0

  16 ÖÁ 20 ÁÐ

                   0                   0                   0                   0                   0

  21 ÁÐ

                   0


outer_code_BER =

  1 ÖÁ 5 ÁÐ

   0.116118422838785   0.106398623278046   0.096252061682942   0.085705573968799   0.074798090702860

  6 ÖÁ 10 ÁÐ

   0.063594006601706   0.052204934683844   0.040864214575871   0.030035659902980   0.020175007338252

  11 ÖÁ 15 ÁÐ

   0.010557865496243   0.000044655611127   0.000000426576140                   0                   0

  16 ÖÁ 20 ÁÐ

                   0                   0                   0                   0                   0

  21 ÁÐ

                   0

µ±Ç°ÍâÂëÎóÂëÂÊÒÑµÍÓÚÄ¿±êÎóÂëÂÊ£¬×ÜÂëÂÊÎª0.31 dB

inner_code_BER =

  1 ÖÁ 5 ÁÐ

   0.116118422838785   0.106398623278045   0.096252061682941   0.085705573968800   0.074798090702846

  6 ÖÁ 10 ÁÐ

   0.063594006600790   0.052204934633809   0.040864212569308   0.030035611242445   0.020174566393633

  11 ÖÁ 15 ÁÐ

   0.010583705787265   0.003523873765640   0.001926695770412   0.001256982508282                   0

  16 ÖÁ 20 ÁÐ

                   0                   0                   0                   0                   0

  21 ÁÐ

                   0


inner_code_BER =

  1 ÖÁ 5 ÁÐ

   0.116118422838785   0.106398623278045   0.096252061682941   0.085705573968800   0.074798090702846

  6 ÖÁ 10 ÁÐ

   0.063594006600790   0.052204934633809   0.040864212569308   0.030035611242445   0.020174566393633

  11 ÖÁ 15 ÁÐ

   0.010583705787265   0.003523873765640   0.001926695770412   0.001256982508282   0.000880296604789

  16 ÖÁ 20 ÁÐ

                   0                   0                   0                   0                   0

  21 ÁÐ

                   0


inner_code_BER =

  1 ÖÁ 5 ÁÐ

   0.116118422838785   0.106398623278045   0.096252061682941   0.085705573968800   0.074798090702846

  6 ÖÁ 10 ÁÐ

   0.063594006600790   0.052204934633809   0.040864212569308   0.030035611242445   0.020174566393633

  11 ÖÁ 15 ÁÐ

   0.010583705787265   0.003523873765640   0.001926695770412   0.001256982508282   0.000880296604789

  16 ÖÁ 20 ÁÐ

   0.000640769211311                   0                   0                   0                   0

  21 ÁÐ

                   0


inner_code_BER =

  1 ÖÁ 5 ÁÐ

   0.116118422838785   0.106398623278045   0.096252061682941   0.085705573968800   0.074798090702846

  6 ÖÁ 10 ÁÐ

   0.063594006600790   0.052204934633809   0.040864212569308   0.030035611242445   0.020174566393633

  11 ÖÁ 15 ÁÐ

   0.010583705787265   0.003523873765640   0.001926695770412   0.001256982508282   0.000880296604789

  16 ÖÁ 20 ÁÐ

   0.000640769211311   0.000477897095967                   0                   0                   0

  21 ÁÐ

                   0


inner_code_BER =

  1 ÖÁ 5 ÁÐ

   0.116118422838785   0.106398623278045   0.096252061682941   0.085705573968800   0.074798090702846

  6 ÖÁ 10 ÁÐ

   0.063594006600790   0.052204934633809   0.040864212569308   0.030035611242445   0.020174566393633

  11 ÖÁ 15 ÁÐ

   0.010583705787265   0.003523873765640   0.001926695770412   0.001256982508282   0.000880296604789

  16 ÖÁ 20 ÁÐ

   0.000640769211311   0.000477897095967   0.000362403657430                   0                   0

  21 ÁÐ

                   0


inner_code_BER =

  1 ÖÁ 5 ÁÐ

   0.116118422838785   0.106398623278045   0.096252061682941   0.085705573968800   0.074798090702846

  6 ÖÁ 10 ÁÐ

   0.063594006600790   0.052204934633809   0.040864212569308   0.030035611242445   0.020174566393633

  11 ÖÁ 15 ÁÐ

   0.010583705787265   0.003523873765640   0.001926695770412   0.001256982508282   0.000880296604789

  16 ÖÁ 20 ÁÐ

   0.000640769211311   0.000477897095967   0.000362403657430   0.000278138862633                   0

  21 ÁÐ

                   0


inner_code_BER =

  1 ÖÁ 5 ÁÐ

   0.116118422838785   0.106398623278045   0.096252061682941   0.085705573968800   0.074798090702846

  6 ÖÁ 10 ÁÐ

   0.063594006600790   0.052204934633809   0.040864212569308   0.030035611242445   0.020174566393633

  11 ÖÁ 15 ÁÐ

   0.010583705787265   0.003523873765640   0.001926695770412   0.001256982508282   0.000880296604789

  16 ÖÁ 20 ÁÐ

   0.000640769211311   0.000477897095967   0.000362403657430   0.000278138862633   0.000215394097346

  21 ÁÐ

                   0


inner_code_BER =

  1 ÖÁ 5 ÁÐ

   0.116118422838785   0.106398623278045   0.096252061682941   0.085705573968800   0.074798090702846

  6 ÖÁ 10 ÁÐ

   0.063594006600790   0.052204934633809   0.040864212569308   0.030035611242445   0.020174566393633

  11 ÖÁ 15 ÁÐ

   0.010583705787265   0.003523873765640   0.001926695770412   0.001256982508282   0.000880296604789

  16 ÖÁ 20 ÁÐ

   0.000640769211311   0.000477897095967   0.000362403657430   0.000278138862633   0.000215394097346

  21 ÁÐ

   0.000167960439124

Ê±¼äÒÑ¹ý 6994.738250 Ãë¡£
