# Supplementary material for: An Efficient Design of Systematic Rateless Codes
Source: Hindawi journal article supplement (doi:10.1155/2020/8068414), 2020-05-19
Supplement: f1 [file 8068414.f1.zip › supplementary files/Matlab_code_for_Figure1/BER_by_DDE/仿真结果/固定符号信噪比变码率比较/BER_by_DDE_rician_sigma2_1_dist0_s_v1.txt]

µ±Ç°ÐÅµÀÎªÀµË¹ÐÅµÀ£¬²ÎÊýr_gamma=2

inner_code_rate =

  1 ÖÁ 5 ÁÐ

   0.327868852459016   0.321543408360129   0.320512820512821   0.319488817891374   0.318471337579618

  6 ÖÁ 10 ÁÐ

   0.317460317460317   0.316455696202532   0.315457413249211   0.314465408805031   0.313479623824451

  11 ÁÐ

   0.312500000000000


code_rate_vec =

  1 ÖÁ 5 ÁÐ

   0.321440051430408   0.315238635647185   0.314228255404726   0.313224331266053   0.312226801548645

  6 ÖÁ 10 ÁÐ

   0.311235605353252   0.310250682551502   0.309271973773737   0.308299420397090   0.307332964533776

  11 ÁÐ

   0.306372549019608


sigma2 =

     1


EsN0indB =

  -3.010299956639812


EbN0indB_vec =

  1 ÖÁ 5 ÁÐ

   1.918700154447222   2.003305651247739   2.017247701163792   2.031145136443849   2.044998241711513

  6 ÖÁ 10 ÁÐ

   2.058807298875369   2.072572587163402   2.086294383156879   2.099972960823691   2.113608591551176

  11 ÁÐ

   2.127201544178424


distr_num =

     0

ÖÆ±í³É¹¦
µ±Ç°Ñ¡ÔñRaptorÂë
µ±Ç°Ñ¡ÔñÏµÍ³Âë

out_node_index =

     1     2     3     4     5     8     9    19    65    66


ans =

  1 ÖÁ 5 ÁÐ

   0.007969000000000   0.493570000000000   0.166220000000000   0.072646000000000   0.082558000000000

  6 ÖÁ 10 ÁÐ

   0.056058000000000   0.037229000000000   0.055590000000000   0.025023000000000   0.003135000000000


inner_code_BER =

  1 ÖÁ 5 ÁÐ

   0.005804916090796                   0                   0                   0                   0

  6 ÖÁ 10 ÁÐ

                   0                   0                   0                   0                   0

  11 ÁÐ

                   0


outer_code_BER =

  1 ÖÁ 5 ÁÐ

   0.005432370417206                   0                   0                   0                   0

  6 ÖÁ 10 ÁÐ

                   0                   0                   0                   0                   0

  11 ÁÐ

                   0


inner_code_BER =

  1 ÖÁ 5 ÁÐ

   0.005804916090796   0.003264232549413                   0                   0                   0

  6 ÖÁ 10 ÁÐ

                   0                   0                   0                   0                   0

  11 ÁÐ

                   0


outer_code_BER =

  1 ÖÁ 5 ÁÐ

   0.005432370417206   0.000000846558044                   0                   0                   0

  6 ÖÁ 10 ÁÐ

                   0                   0                   0                   0                   0

  11 ÁÐ

                   0

µ±Ç°ÍâÂëÎóÂëÂÊÒÑµÍÓÚÄ¿±êÎóÂëÂÊ£¬×ÜÂëÂÊÎª0.32 dB

inner_code_BER =

  1 ÖÁ 5 ÁÐ

   0.005804916090796   0.003264232549413   0.003039342104372                   0                   0

  6 ÖÁ 10 ÁÐ

                   0                   0                   0                   0                   0

  11 ÁÐ

                   0


inner_code_BER =

  1 ÖÁ 5 ÁÐ

   0.005804916090796   0.003264232549413   0.003039342104372   0.002842274311138                   0

  6 ÖÁ 10 ÁÐ

                   0                   0                   0                   0                   0

  11 ÁÐ

                   0


inner_code_BER =

  1 ÖÁ 5 ÁÐ

   0.005804916090796   0.003264232549413   0.003039342104372   0.002842274311138   0.002667851605862

  6 ÖÁ 10 ÁÐ

                   0                   0                   0                   0                   0

  11 ÁÐ

                   0


inner_code_BER =

  1 ÖÁ 5 ÁÐ

   0.005804916090796   0.003264232549413   0.003039342104372   0.002842274311138   0.002667851605862

  6 ÖÁ 10 ÁÐ

   0.002512119165360                   0                   0                   0                   0

  11 ÁÐ

                   0


inner_code_BER =

  1 ÖÁ 5 ÁÐ

   0.005804916090796   0.003264232549413   0.003039342104372   0.002842274311138   0.002667851605862

  6 ÖÁ 10 ÁÐ

   0.002512119165360   0.002372029221196                   0                   0                   0

  11 ÁÐ

                   0


inner_code_BER =

  1 ÖÁ 5 ÁÐ

   0.005804916090796   0.003264232549413   0.003039342104372   0.002842274311138   0.002667851605862

  6 ÖÁ 10 ÁÐ

   0.002512119165360   0.002372029221196   0.002245180802754                   0                   0

  11 ÁÐ

                   0


inner_code_BER =

  1 ÖÁ 5 ÁÐ

   0.005804916090796   0.003264232549413   0.003039342104372   0.002842274311138   0.002667851605862

  6 ÖÁ 10 ÁÐ

   0.002512119165360   0.002372029221196   0.002245180802754   0.002129660234324                   0

  11 ÁÐ

                   0


inner_code_BER =

  1 ÖÁ 5 ÁÐ

   0.005804916090796   0.003264232549413   0.003039342104372   0.002842274311138   0.002667851605862

  6 ÖÁ 10 ÁÐ

   0.002512119165360   0.002372029221196   0.002245180802754   0.002129660234324   0.002023922040024

  11 ÁÐ

                   0


inner_code_BER =

  1 ÖÁ 5 ÁÐ

   0.005804916090796   0.003264232549413   0.003039342104372   0.002842274311138   0.002667851605862

  6 ÖÁ 10 ÁÐ

   0.002512119165360   0.002372029221196   0.002245180802754   0.002129660234324   0.002023922040024

  11 ÁÐ

   0.001926695770412

Ê±¼äÒÑ¹ý 1210.013139 Ãë¡£
