# Supplementary material for: An Efficient Design of Systematic Rateless Codes
Source: Hindawi journal article supplement (doi:10.1155/2020/8068414), 2020-05-19
Supplement: f1 [file 8068414.f1.zip › supplementary files/Matlab_code_for_Figure1/BER_by_DDE/仿真结果/固定符号信噪比变码率比较/comp_SR_NR_sigma2_1_rician.m]

%%% ¹Ì¶¨sigma2=1£¬·Ö²¼ÎªBECÓÅ»¯µÄ½á¹û,ÐÅµÀÎªricianÐÅµÀ
%%%%%%% SR Âë  %%%%%%%%%
overhead=[1:0.1:2.0              2.05   2.1    2.11    ];
BER=[0.116118422838785   0.106398623278046   0.096252061682942   0.085705573968799   0.074798090702860...
    0.063594006601706   0.052204934683844   0.040864214575871   0.030035659902980   0.020175007338252...
    0.010557865496243   0.005432370417206      0.000044655611127  0.000000846558044     ];
semilogy(overhead,BER,'k-o')


%%%%%%% NR Âë  %%%%%%%%%
overhead=[1:0.1:2.30 2.35 2.39 2.4];
BER=[0.493907585852354   0.492198533608138   0.489904096369359   0.486783118037189   0.482531625689520...
     0.476793232685481   0.469131333867993   0.458915825883972   0.445026855003544   0.425122992411695...
      0.393659406056264   0.336873905963812   0.231985875771787   0.097332380330250       0.042453279251763    0.014108975197111...  
      0.000000061532091...
      ];
hold on;semilogy(overhead,BER,'k-s');


axis([1 2.5 1e-6 1 ])
legend('Systematic Raptor code','Non-systematic Raptor code')
xlabel('\epsilon');ylabel('Error probability')
