# Supplementary material for: An Efficient Design of Systematic Rateless Codes
Source: Hindawi journal article supplement (doi:10.1155/2020/8068414), 2020-05-19
Supplement: f1 [file 8068414.f1.zip › supplementary files/Matlab_code_for_Figure1/BER_by_DDE/仿真结果/高斯近似消息比较/BER_by_DDE_rician_rate_1_2_dist0_Ns_GA.txt]

µ±Ç°ÐÅµÀÎªÀµË¹ÐÅµÀ£¬²ÎÊýgamma=2

EbN0indB_vec =

  Columns 1 through 5

                   0   0.100000000000000   0.200000000000000   0.300000000000000   0.400000000000000

  Columns 6 through 10

   0.500000000000000   0.600000000000000   0.700000000000000   0.800000000000000   0.900000000000000

  Columns 11 through 15

   1.000000000000000   1.100000000000000   1.200000000000000   1.300000000000000   1.400000000000000

  Columns 16 through 20

   1.500000000000000   1.600000000000000   1.700000000000000   1.800000000000000   1.900000000000000

  Column 21

   2.000000000000000

ÖÆ±í³É¹¦
µ±Ç°Ñ¡ÔñRaptorÂëµ±Ç°Ñ¡Ôñ·ÇÏµÍ³Âë
×ÜÂëÂÊ=0.50000, ÍâÂëÂëÂÊ=0.98039, ÄÚÂëÂëÂÊ=0.51000

out_node_index =

     1     2     3     4     5     8     9    19    65    66


ans =

  Columns 1 through 5

   0.007969000000000   0.493570000000000   0.166220000000000   0.072646000000000   0.082558000000000

  Columns 6 through 10

   0.056058000000000   0.037229000000000   0.055590000000000   0.025023000000000   0.003135000000000


inner_code_BER =

  Columns 1 through 5

   0.407984990365307                   0                   0                   0                   0

  Columns 6 through 10

                   0                   0                   0                   0                   0

  Columns 11 through 15

                   0                   0                   0                   0                   0

  Columns 16 through 20

                   0                   0                   0                   0                   0

  Column 21

                   0


ans =

  20.000000000000050


outer_code_BER_g =

   0.408071934163363


outer_code_BER =

  Columns 1 through 5

   0.407984990365306                   0                   0                   0                   0

  Columns 6 through 10

                   0                   0                   0                   0                   0

  Columns 11 through 15

                   0                   0                   0                   0                   0

  Columns 16 through 20

                   0                   0                   0                   0                   0

  Column 21

                   0


inner_code_BER =

  Columns 1 through 5

   0.407984990365307   0.399737629332758                   0                   0                   0

  Columns 6 through 10

                   0                   0                   0                   0                   0

  Columns 11 through 15

                   0                   0                   0                   0                   0

  Columns 16 through 20

                   0                   0                   0                   0                   0

  Column 21

                   0


ans =

  20.000000000000046


outer_code_BER_g =

   0.408071934163363   0.399816865562776


outer_code_BER =

  Columns 1 through 5

   0.407984990365306   0.399737629332759                   0                   0                   0

  Columns 6 through 10

                   0                   0                   0                   0                   0

  Columns 11 through 15

                   0                   0                   0                   0                   0

  Columns 16 through 20

                   0                   0                   0                   0                   0

  Column 21

                   0


inner_code_BER =

  Columns 1 through 5

   0.407984990365307   0.399737629332758   0.390114655522012                   0                   0

  Columns 6 through 10

                   0                   0                   0                   0                   0

  Columns 11 through 15

                   0                   0                   0                   0                   0

  Columns 16 through 20

                   0                   0                   0                   0                   0

  Column 21

                   0


ans =

  20.000000000000050


outer_code_BER_g =

   0.408071934163363   0.399816865562776   0.390186309067922


outer_code_BER =

  Columns 1 through 5

   0.407984990365306   0.399737629332759   0.390114655522012                   0                   0

  Columns 6 through 10

                   0                   0                   0                   0                   0

  Columns 11 through 15

                   0                   0                   0                   0                   0

  Columns 16 through 20

                   0                   0                   0                   0                   0

  Column 21

                   0


inner_code_BER =

  Columns 1 through 5

   0.407984990365307   0.399737629332758   0.390114655522012   0.378761781947485                   0

  Columns 6 through 10

                   0                   0                   0                   0                   0

  Columns 11 through 15

                   0                   0                   0                   0                   0

  Columns 16 through 20

                   0                   0                   0                   0                   0

  Column 21

                   0


ans =

  20.000000000000043


outer_code_BER_g =

   0.408071934163363   0.399816865562776   0.390186309067922   0.378825971438153


outer_code_BER =

  Columns 1 through 5

   0.407984990365306   0.399737629332759   0.390114655522012   0.378761781947485                   0

  Columns 6 through 10

                   0                   0                   0                   0                   0

  Columns 11 through 15

                   0                   0                   0                   0                   0

  Columns 16 through 20

                   0                   0                   0                   0                   0

  Column 21

                   0


inner_code_BER =

  Columns 1 through 5

   0.407984990365307   0.399737629332758   0.390114655522012   0.378761781947485   0.365218339469444

  Columns 6 through 10

                   0                   0                   0                   0                   0

  Columns 11 through 15

                   0                   0                   0                   0                   0

  Columns 16 through 20

                   0                   0                   0                   0                   0

  Column 21

                   0


ans =

  20.000000000000028


outer_code_BER_g =

   0.408071934163363   0.399816865562776   0.390186309067922   0.378825971438153   0.365275184869545


outer_code_BER =

  Columns 1 through 5

   0.407984990365306   0.399737629332759   0.390114655522012   0.378761781947485   0.365218339469444

  Columns 6 through 10

                   0                   0                   0                   0                   0

  Columns 11 through 15

                   0                   0                   0                   0                   0

  Columns 16 through 20

                   0                   0                   0                   0                   0

  Column 21

                   0


inner_code_BER =

  Columns 1 through 5

   0.407984990365307   0.399737629332758   0.390114655522012   0.378761781947485   0.365218339469444

  Columns 6 through 10

   0.348894728641558                   0                   0                   0                   0

  Columns 11 through 15

                   0                   0                   0                   0                   0

  Columns 16 through 20

                   0                   0                   0                   0                   0

  Column 21

                   0


ans =

  20.000000000000011


outer_code_BER_g =

  Columns 1 through 5

   0.408071934163363   0.399816865562776   0.390186309067922   0.378825971438153   0.365275184869545

  Column 6

   0.348944362519807


outer_code_BER =

  Columns 1 through 5

   0.407984990365306   0.399737629332759   0.390114655522012   0.378761781947485   0.365218339469444

  Columns 6 through 10

   0.348894728641558                   0                   0                   0                   0

  Columns 11 through 15

                   0                   0                   0                   0                   0

  Columns 16 through 20

                   0                   0                   0                   0                   0

  Column 21

                   0


inner_code_BER =

  Columns 1 through 5

   0.407984990365307   0.399737629332758   0.390114655522012   0.378761781947485   0.365218339469444

  Columns 6 through 10

   0.348894728641558   0.329063753685713                   0                   0                   0

  Columns 11 through 15

                   0                   0                   0                   0                   0

  Columns 16 through 20

                   0                   0                   0                   0                   0

  Column 21

                   0


ans =

  20.000000000000025


outer_code_BER_g =

  Columns 1 through 5

   0.408071934163363   0.399816865562776   0.390186309067922   0.378825971438153   0.365275184869545

  Columns 6 through 7

   0.348944362519807   0.329106337220274


outer_code_BER =

  Columns 1 through 5

   0.407984990365306   0.399737629332759   0.390114655522012   0.378761781947485   0.365218339469444

  Columns 6 through 10

   0.348894728641558   0.329063753685713                   0                   0                   0

  Columns 11 through 15

                   0                   0                   0                   0                   0

  Columns 16 through 20

                   0                   0                   0                   0                   0

  Column 21

                   0


inner_code_BER =

  Columns 1 through 5

   0.407984990365307   0.399737629332758   0.390114655522012   0.378761781947485   0.365218339469444

  Columns 6 through 10

   0.348894728641558   0.329063753685713   0.304898306775474                   0                   0

  Columns 11 through 15

                   0                   0                   0                   0                   0

  Columns 16 through 20

                   0                   0                   0                   0                   0

  Column 21

                   0


ans =

  19.999999999999993


outer_code_BER_g =

  Columns 1 through 5

   0.408071934163363   0.399816865562776   0.390186309067922   0.378825971438153   0.365275184869545

  Columns 6 through 8

   0.348944362519807   0.329106337220274   0.304934051829806


outer_code_BER =

  Columns 1 through 5

   0.407984990365306   0.399737629332759   0.390114655522012   0.378761781947485   0.365218339469444

  Columns 6 through 10

   0.348894728641558   0.329063753685713   0.304898306775474                   0                   0

  Columns 11 through 15

                   0                   0                   0                   0                   0

  Columns 16 through 20

                   0                   0                   0                   0                   0

  Column 21

                   0


inner_code_BER =

  Columns 1 through 5

   0.407984990365307   0.399737629332758   0.390114655522012   0.378761781947485   0.365218339469444

  Columns 6 through 10

   0.348894728641558   0.329063753685713   0.304898306775474   0.275620579415850                   0

  Columns 11 through 15

                   0                   0                   0                   0                   0

  Columns 16 through 20

                   0                   0                   0                   0                   0

  Column 21

                   0


ans =

  20.000000000000018


outer_code_BER_g =

  Columns 1 through 5

   0.408071934163363   0.399816865562776   0.390186309067922   0.378825971438153   0.365275184869545

  Columns 6 through 9

   0.348944362519807   0.329106337220274   0.304934051829806   0.275649777850357


outer_code_BER =

  Columns 1 through 5

   0.407984990365306   0.399737629332759   0.390114655522012   0.378761781947485   0.365218339469444

  Columns 6 through 10

   0.348894728641558   0.329063753685713   0.304898306775474   0.275620579415851                   0

  Columns 11 through 15

                   0                   0                   0                   0                   0

  Columns 16 through 20

                   0                   0                   0                   0                   0

  Column 21

                   0


inner_code_BER =

  Columns 1 through 5

   0.407984990365307   0.399737629332758   0.390114655522012   0.378761781947485   0.365218339469444

  Columns 6 through 10

   0.348894728641558   0.329063753685713   0.304898306775474   0.275620579415850   0.240826173423957

  Columns 11 through 15

                   0                   0                   0                   0                   0

  Columns 16 through 20

                   0                   0                   0                   0                   0

  Column 21

                   0


ans =

  20.000000000000039


outer_code_BER_g =

  Columns 1 through 5

   0.408071934163363   0.399816865562776   0.390186309067922   0.378825971438153   0.365275184869545

  Columns 6 through 10

   0.348944362519807   0.329106337220274   0.304934051829806   0.275649777850357   0.240849228295880


outer_code_BER =

  Columns 1 through 5

   0.407984990365306   0.399737629332759   0.390114655522012   0.378761781947485   0.365218339469444

  Columns 6 through 10

   0.348894728641558   0.329063753685713   0.304898306775474   0.275620579415851   0.240826173423957

  Columns 11 through 15

                   0                   0                   0                   0                   0

  Columns 16 through 20

                   0                   0                   0                   0                   0

  Column 21

                   0


inner_code_BER =

  Columns 1 through 5

   0.407984990365307   0.399737629332758   0.390114655522012   0.378761781947485   0.365218339469444

  Columns 6 through 10

   0.348894728641558   0.329063753685713   0.304898306775474   0.275620579415850   0.240826173423957

  Columns 11 through 15

   0.200827196941285                   0                   0                   0                   0

  Columns 16 through 20

                   0                   0                   0                   0                   0

  Column 21

                   0


ans =

  20.000000000000021


outer_code_BER_g =

  Columns 1 through 5

   0.408071934163363   0.399816865562776   0.390186309067922   0.378825971438153   0.365275184869545

  Columns 6 through 10

   0.348944362519807   0.329106337220274   0.304934051829806   0.275649777850357   0.240849228295880

  Column 11

   0.200844626966822


outer_code_BER =

  Columns 1 through 5

   0.407984990365306   0.399737629332759   0.390114655522012   0.378761781947485   0.365218339469444

  Columns 6 through 10

   0.348894728641558   0.329063753685713   0.304898306775474   0.275620579415851   0.240826173423957

  Columns 11 through 15

   0.200827196941286                   0                   0                   0                   0

  Columns 16 through 20

                   0                   0                   0                   0                   0

  Column 21

                   0


inner_code_BER =

  Columns 1 through 5

   0.407984990365307   0.399737629332758   0.390114655522012   0.378761781947485   0.365218339469444

  Columns 6 through 10

   0.348894728641558   0.329063753685713   0.304898306775474   0.275620579415850   0.240826173423957

  Columns 11 through 15

   0.200827196941285   0.156666002635738                   0                   0                   0

  Columns 16 through 20

                   0                   0                   0                   0                   0

  Column 21

                   0


ans =

  19.999999999999993


outer_code_BER_g =

  Columns 1 through 5

   0.408071934163363   0.399816865562776   0.390186309067922   0.378825971438153   0.365275184869545

  Columns 6 through 10

   0.348944362519807   0.329106337220274   0.304934051829806   0.275649777850357   0.240849228295880

  Columns 11 through 12

   0.200844626966822   0.156678399163030


outer_code_BER =

  Columns 1 through 5

   0.407984990365306   0.399737629332759   0.390114655522012   0.378761781947485   0.365218339469444

  Columns 6 through 10

   0.348894728641558   0.329063753685713   0.304898306775474   0.275620579415851   0.240826173423957

  Columns 11 through 15

   0.200827196941286   0.156666002635738                   0                   0                   0

  Columns 16 through 20

                   0                   0                   0                   0                   0

  Column 21

                   0


inner_code_BER =

  Columns 1 through 5

   0.407984990365307   0.399737629332758   0.390114655522012   0.378761781947485   0.365218339469444

  Columns 6 through 10

   0.348894728641558   0.329063753685713   0.304898306775474   0.275620579415850   0.240826173423957

  Columns 11 through 15

   0.200827196941285   0.156666002635738   0.111096789616067                   0                   0

  Columns 16 through 20

                   0                   0                   0                   0                   0

  Column 21

                   0


ans =

  19.999999999999979


outer_code_BER_g =

  Columns 1 through 5

   0.408071934163363   0.399816865562776   0.390186309067922   0.378825971438153   0.365275184869545

  Columns 6 through 10

   0.348944362519807   0.329106337220274   0.304934051829806   0.275649777850357   0.240849228295880

  Columns 11 through 13

   0.200844626966822   0.156678399163030   0.111104869728081


outer_code_BER =

  Columns 1 through 5

   0.407984990365306   0.399737629332759   0.390114655522012   0.378761781947485   0.365218339469444

  Columns 6 through 10

   0.348894728641558   0.329063753685713   0.304898306775474   0.275620579415851   0.240826173423957

  Columns 11 through 15

   0.200827196941286   0.156666002635738   0.111096789616068                   0                   0

  Columns 16 through 20

                   0                   0                   0                   0                   0

  Column 21

                   0


inner_code_BER =

  Columns 1 through 5

   0.407984990365307   0.399737629332758   0.390114655522012   0.378761781947485   0.365218339469444

  Columns 6 through 10

   0.348894728641558   0.329063753685713   0.304898306775474   0.275620579415850   0.240826173423957

  Columns 11 through 15

   0.200827196941285   0.156666002635738   0.111096789616067   0.068511022311523                   0

  Columns 16 through 20

                   0                   0                   0                   0                   0

  Column 21

                   0


ans =

  19.999999999957325


outer_code_BER_g =

  Columns 1 through 5

   0.408071934163363   0.399816865562776   0.390186309067922   0.378825971438153   0.365275184869545

  Columns 6 through 10

   0.348944362519807   0.329106337220274   0.304934051829806   0.275649777850357   0.240849228295880

  Columns 11 through 14

   0.200844626966822   0.156678399163030   0.111104869728081   0.068515647995787


outer_code_BER =

  Columns 1 through 5

   0.407984990365306   0.399737629332759   0.390114655522012   0.378761781947485   0.365218339469444

  Columns 6 through 10

   0.348894728641558   0.329063753685713   0.304898306775474   0.275620579415851   0.240826173423957

  Columns 11 through 15

   0.200827196941286   0.156666002635738   0.111096789616068   0.068511022311587                   0

  Columns 16 through 20

                   0                   0                   0                   0                   0

  Column 21

                   0


inner_code_BER =

  Columns 1 through 5

   0.407984990365307   0.399737629332758   0.390114655522012   0.378761781947485   0.365218339469444

  Columns 6 through 10

   0.348894728641558   0.329063753685713   0.304898306775474   0.275620579415850   0.240826173423957

  Columns 11 through 15

   0.200827196941285   0.156666002635738   0.111096789616067   0.068511022311523   0.030292038535640

  Columns 16 through 20

                   0                   0                   0                   0                   0

  Column 21

                   0


ans =

  19.999983441873230


outer_code_BER_g =

  Columns 1 through 5

   0.408071934163363   0.399816865562776   0.390186309067922   0.378825971438153   0.365275184869545

  Columns 6 through 10

   0.348944362519807   0.329106337220274   0.304934051829806   0.275649777850357   0.240849228295880

  Columns 11 through 15

   0.200844626966822   0.156678399163030   0.111104869728081   0.068515647995787   0.030294007836817


outer_code_BER =

  Columns 1 through 5

   0.407984990365306   0.399737629332759   0.390114655522012   0.378761781947485   0.365218339469444

  Columns 6 through 10

   0.348894728641558   0.329063753685713   0.304898306775474   0.275620579415851   0.240826173423957

  Columns 11 through 15

   0.200827196941286   0.156666002635738   0.111096789616068   0.068511022311587   0.030292074410766

  Columns 16 through 20

                   0                   0                   0                   0                   0

  Column 21

                   0


inner_code_BER =

  Columns 1 through 5

   0.407984990365307   0.399737629332758   0.390114655522012   0.378761781947485   0.365218339469444

  Columns 6 through 10

   0.348894728641558   0.329063753685713   0.304898306775474   0.275620579415850   0.240826173423957

  Columns 11 through 15

   0.200827196941285   0.156666002635738   0.111096789616067   0.068511022311523   0.030292038535640

  Columns 16 through 20

   0.002453833322317                   0                   0                   0                   0

  Column 21

                   0


ans =

  18.979549764757241


outer_code_BER_g =

  Columns 1 through 5

   0.408071934163363   0.399816865562776   0.390186309067922   0.378825971438153   0.365275184869545

  Columns 6 through 10

   0.348944362519807   0.329106337220274   0.304934051829806   0.275649777850357   0.240849228295880

  Columns 11 through 15

   0.200844626966822   0.156678399163030   0.111104869728081   0.068515647995787   0.030294007836817

  Column 16

   0.000000011376076


outer_code_BER =

  Columns 1 through 5

   0.407984990365306   0.399737629332759   0.390114655522012   0.378761781947485   0.365218339469444

  Columns 6 through 10

   0.348894728641558   0.329063753685713   0.304898306775474   0.275620579415851   0.240826173423957

  Columns 11 through 15

   0.200827196941286   0.156666002635738   0.111096789616068   0.068511022311587   0.030292074410766

  Columns 16 through 20

   0.000000789970765                   0                   0                   0                   0

  Column 21

                   0


inner_code_BER =

  Columns 1 through 5

   0.407984990365307   0.399737629332758   0.390114655522012   0.378761781947485   0.365218339469444

  Columns 6 through 10

   0.348894728641558   0.329063753685713   0.304898306775474   0.275620579415850   0.240826173423957

  Columns 11 through 15

   0.200827196941285   0.156666002635738   0.111096789616067   0.068511022311523   0.030292038535640

  Columns 16 through 20

   0.002453833322317   0.001958840697195                   0                   0                   0

  Column 21

                   0


ans =

  18.537224879640519


outer_code_BER_g =

  Columns 1 through 5

   0.408071934163363   0.399816865562776   0.390186309067922   0.378825971438153   0.365275184869545

  Columns 6 through 10

   0.348944362519807   0.329106337220274   0.304934051829806   0.275649777850357   0.240849228295880

  Columns 11 through 15

   0.200844626966822   0.156678399163030   0.111104869728081   0.068515647995787   0.030294007836817

  Columns 16 through 17

   0.000000011376076   0.000000000131610


outer_code_BER =

  Columns 1 through 5

   0.407984990365306   0.399737629332759   0.390114655522012   0.378761781947485   0.365218339469444

  Columns 6 through 10

   0.348894728641558   0.329063753685713   0.304898306775474   0.275620579415851   0.240826173423957

  Columns 11 through 15

   0.200827196941286   0.156666002635738   0.111096789616068   0.068511022311587   0.030292074410766

  Columns 16 through 20

   0.000000789970765   0.000000303979189                   0                   0                   0

  Column 21

                   0


inner_code_BER =

  Columns 1 through 5

   0.407984990365307   0.399737629332758   0.390114655522012   0.378761781947485   0.365218339469444

  Columns 6 through 10

   0.348894728641558   0.329063753685713   0.304898306775474   0.275620579415850   0.240826173423957

  Columns 11 through 15

   0.200827196941285   0.156666002635738   0.111096789616067   0.068511022311523   0.030292038535640

  Columns 16 through 20

   0.002453833322317   0.001958840697195   0.001631959199995                   0                   0

  Column 21

                   0


ans =

  18.103923930827669


outer_code_BER_g =

  Columns 1 through 5

   0.408071934163363   0.399816865562776   0.390186309067922   0.378825971438153   0.365275184869545

  Columns 6 through 10

   0.348944362519807   0.329106337220274   0.304934051829806   0.275649777850357   0.240849228295880

  Columns 11 through 15

   0.200844626966822   0.156678399163030   0.111104869728081   0.068515647995787   0.030294007836817

  Columns 16 through 18

   0.000000011376076   0.000000000131610   0.000000010764178


outer_code_BER =

  Columns 1 through 5

   0.407984990365306   0.399737629332759   0.390114655522012   0.378761781947485   0.365218339469444

  Columns 6 through 10

   0.348894728641558   0.329063753685713   0.304898306775474   0.275620579415851   0.240826173423957

  Columns 11 through 15

   0.200827196941286   0.156666002635738   0.111096789616068   0.068511022311587   0.030292074410766

  Columns 16 through 20

   0.000000789970765   0.000000303979189   0.000000000460288                   0                   0

  Column 21

                   0


inner_code_BER =

  Columns 1 through 5

   0.407984990365307   0.399737629332758   0.390114655522012   0.378761781947485   0.365218339469444

  Columns 6 through 10

   0.348894728641558   0.329063753685713   0.304898306775474   0.275620579415850   0.240826173423957

  Columns 11 through 15

   0.200827196941285   0.156666002635738   0.111096789616067   0.068511022311523   0.030292038535640

  Columns 16 through 20

   0.002453833322317   0.001958840697195   0.001631959199995   0.001391971833343                   0

  Column 21

                   0


ans =

  17.672296425631998


outer_code_BER_g =

  Columns 1 through 5

   0.408071934163363   0.399816865562776   0.390186309067922   0.378825971438153   0.365275184869545

  Columns 6 through 10

   0.348944362519807   0.329106337220274   0.304934051829806   0.275649777850357   0.240849228295880

  Columns 11 through 15

   0.200844626966822   0.156678399163030   0.111104869728081   0.068515647995787   0.030294007836817

  Columns 16 through 19

   0.000000011376076   0.000000000131610   0.000000010764178   0.000000000022552


outer_code_BER =

  Columns 1 through 5

   0.407984990365306   0.399737629332759   0.390114655522012   0.378761781947485   0.365218339469444

  Columns 6 through 10

   0.348894728641558   0.329063753685713   0.304898306775474   0.275620579415851   0.240826173423957

  Columns 11 through 15

   0.200827196941286   0.156666002635738   0.111096789616068   0.068511022311587   0.030292074410766

  Columns 16 through 20

   0.000000789970765   0.000000303979189   0.000000000460288   0.000000361981020                   0

  Column 21

                   0


inner_code_BER =

  Columns 1 through 5

   0.407984990365307   0.399737629332758   0.390114655522012   0.378761781947485   0.365218339469444

  Columns 6 through 10

   0.348894728641558   0.329063753685713   0.304898306775474   0.275620579415850   0.240826173423957

  Columns 11 through 15

   0.200827196941285   0.156666002635738   0.111096789616067   0.068511022311523   0.030292038535640

  Columns 16 through 20

   0.002453833322317   0.001958840697195   0.001631959199995   0.001391971833343   0.001205521315282

  Column 21

                   0


ans =

  17.240302269380177


outer_code_BER_g =

  Columns 1 through 5

   0.408071934163363   0.399816865562776   0.390186309067922   0.378825971438153   0.365275184869545

  Columns 6 through 10

   0.348944362519807   0.329106337220274   0.304934051829806   0.275649777850357   0.240849228295880

  Columns 11 through 15

   0.200844626966822   0.156678399163030   0.111104869728081   0.068515647995787   0.030294007836817

  Columns 16 through 20

   0.000000011376076   0.000000000131610   0.000000010764178   0.000000000022552   0.000000143501117


outer_code_BER =

  Columns 1 through 5

   0.407984990365306   0.399737629332759   0.390114655522012   0.378761781947485   0.365218339469444

  Columns 6 through 10

   0.348894728641558   0.329063753685713   0.304898306775474   0.275620579415851   0.240826173423957

  Columns 11 through 15

   0.200827196941286   0.156666002635738   0.111096789616068   0.068511022311587   0.030292074410766

  Columns 16 through 20

   0.000000789970765   0.000000303979189   0.000000000460288   0.000000361981020   0.000000026686043

  Column 21

                   0


inner_code_BER =

  Columns 1 through 5

   0.407984990365307   0.399737629332758   0.390114655522012   0.378761781947485   0.365218339469444

  Columns 6 through 10

   0.348894728641558   0.329063753685713   0.304898306775474   0.275620579415850   0.240826173423957

  Columns 11 through 15

   0.200827196941285   0.156666002635738   0.111096789616067   0.068511022311523   0.030292038535640

  Columns 16 through 20

   0.002453833322317   0.001958840697195   0.001631959199995   0.001391971833343   0.001205521315282

  Column 21

   0.001055418648221


ans =

  16.807592756160165


outer_code_BER_g =

  Columns 1 through 5

   0.408071934163363   0.399816865562776   0.390186309067922   0.378825971438153   0.365275184869545

  Columns 6 through 10

   0.348944362519807   0.329106337220274   0.304934051829806   0.275649777850357   0.240849228295880

  Columns 11 through 15

   0.200844626966822   0.156678399163030   0.111104869728081   0.068515647995787   0.030294007836817

  Columns 16 through 20

   0.000000011376076   0.000000000131610   0.000000010764178   0.000000000022552   0.000000143501117

  Column 21

   0.000000013370974


outer_code_BER =

  Columns 1 through 5

   0.407984990365306   0.399737629332759   0.390114655522012   0.378761781947485   0.365218339469444

  Columns 6 through 10

   0.348894728641558   0.329063753685713   0.304898306775474   0.275620579415851   0.240826173423957

  Columns 11 through 15

   0.200827196941286   0.156666002635738   0.111096789616068   0.068511022311587   0.030292074410766

  Columns 16 through 20

   0.000000789970765   0.000000303979189   0.000000000460288   0.000000361981020   0.000000026686043

  Column 21

   0.000000001808952

Elapsed time is 17874.696891 seconds.
