# Supplementary material for: An Efficient Design of Systematic Rateless Codes
Source: Hindawi journal article supplement (doi:10.1155/2020/8068414), 2020-05-19
Supplement: f1 [file 8068414.f1.zip › supplementary files/Matlab_code_for_Figure1/BER_by_GA_EXIT/DDE_outcode.m]

% 20190404  ÀûÓÃÄÚÂëÊä³öÎóÂëÂÊÏûÏ¢£¨ÒÑÖª£©£¬ÍâÂëÓÃDDEÇó³öRaptorÂëÎóÂëÂÊ
function BER_outer_code_vec=DDE_outcode(BER_inner_code_vec)
% ÒÑÖªÄÚÂëµÄÎóÂëÂÊ£¬Í¨¹ýDDE¼ÆËãÍâÂëÎóÂëÂÊ

%%%%% Ëã·¨²ÎÊýÉèÖÃ   %%%%
delta=0.05;  %Á¿»¯¼ä¸ô
v_max=25;       % ·¶Î§²»ÄÜÌ«Ð¡£¬ÒòÎªµü´úºópvµÄ·Ö²¼»áÏò½Ï´óµÄvÖµ£¨Èç40-50£©¡°ÒÆ¶¯¡±£¬Ì«Ð¡µÄ»°»á¡°¸²¸Ç¡±²»È«
v_min=-25;
v_range=[v_min delta v_max];
v=[v_min:delta:v_max];
% load lookup_table_v__20_005_60;  % ÏàÓ¦µÄ²éÕÒ±í
[ii_vec,jj_vec,startpoint_vec,endpoint_vec,ij_length_dist]=Gene_Lookup_Table_for_ChNode_update(v_range);


a_delta=0.01;
a_vec=[a_delta:a_delta:20];                                      % Ë¥ÂäÏµÊý²ÉÑùÖµ
[vv,aa]=meshgrid(v,a_vec);


outer_code_rate=0.98;  % ÍâÂëÂëÂÊ  
dv=4;dc=200;    % ÍâÂë£¨¹æÔòLDPCÂë£©¶ÈÊý

BER_outer_code_vec=zeros(1,length(BER_inner_code_vec));
%%%%%%%%%% outer code  DDE %%%%%%
for ii=1:length(BER_inner_code_vec)
% LT_BER=LT_BER_vec(ii);    % µ±Ç°ÄÚÂëÎóÂëÂÊ
LT_BER=BER_inner_code_vec(ii);
inter_m=2*qfuncinv(  LT_BER  )^2;        % ÎóÂëÂÊ¶ÔÓ¦µÄ¸ßË¹±äÁ¿µÄ¾ùÖµ
inter_sig2=2*inter_m;
gaussian_message(ii,:)=1/sqrt(2*pi*inter_sig2)*exp(-(v-inter_m).^2/(2*inter_sig2));
sum(gaussian_message(ii,:))
pv_output_g=gaussian_message(ii,:);
pv_output_g(end)=1/delta-sum(pv_output_g(1:end-1));

% if flag_outdecoding==1
qv_init=pv_output_g;   % ¡°³¬ÐÅµÀ¡±Êä³öµÄ³õÊ¼ÏûÏ¢
qv=qv_init;
outer_code_ber_g=[];
outer_iter_max=100;
for iter_index=1:outer_iter_max
   %%%%%%  Ð£Ñé½ÚµãµÄPMF×ª»»  %%%%%
        temp_qu=[zeros(1,length(v));qv;zeros(dc-2,length(v))];    
        for ii_index=3:dc     % À´Ô´±ßÓÐ2ÖÁdc-1¸ö²»È·¶¨ÏûÏ¢Ê±µÄÊä³öÏûÏ¢£¬Ã¿´ÎÑ­»·ÄÜ¼ÆËãÒ»ÖÖÇé¿ö£¬¶ÔÓ¦ÓÚtemp_puÖÐµÄÒ»ÐÐ
            temp_qu(ii_index,:)=ChNode_R2_first_fun(ii_vec,jj_vec,startpoint_vec,ij_length_dist,temp_qu(ii_index-1,:),qv,delta);
        end
        qu=temp_qu(dc,:);
   %%%%%% ±äÁ¿½ÚµãµÄPMF×ª»» %%%%%%%%%
    temp_qv=zeros(dv,length(v));    % ×î¶àÓÐdvÖÖ¶ÈÊý£¬ÆäÖÐÇÒ¿Ï¶¨Ã»ÓÐ¶ÈÊýÎª1µÄ½Úµã
    for ii_index=2:dv
        temp_qv(ii_index,:)=VarNode_conv(qv_init,qu,ii_index,v,delta);
    end
    qv=temp_qv(dv,:);
    qv=qv/sum(qv)/delta;      
    
    outer_code_ber_g(iter_index)=(sum(qv(1:abs(v_min/delta)))+0.5*qv(abs(v_min/delta)+1))*delta;
    if outer_code_ber_g(iter_index)<1e-6
        break;
    end
end    %for iter_index=1:inner_iter_max
BER_outer_code_vec(ii)=outer_code_ber_g(iter_index)

end % for ii
    
