# Supplementary material for: An Efficient Design of Systematic Rateless Codes
Source: Hindawi journal article supplement (doi:10.1155/2020/8068414), 2020-05-19
Supplement: f1 [file 8068414.f1.zip › supplementary files/Matlab_code_for_Figure1/BER_by_GA_EXIT/EXIT_BER_outcode.m]

function BER_outer_code_vec=EXIT_BER_outcode(initial_exi_vec,code_rate)

flag=0; % ±êÖ¾ÊÇ·ñÕÒµ½ÃÅÏÞ
% code_rate=0.98;
isirregular=0;
if isirregular==0
   dl=4;dr=round(dl/(1-code_rate));                                                                      % ¹æÔòÂë×ÖµÄ¶È·Ö²¼
   var_index=dl;
   var_degree(var_index)=1;
   ch_index=dr;
   ch_degree(ch_index)=1;    
   code_rate=1-sum(ch_degree(ch_index)./ch_index)/sum(var_degree(var_index)./var_index);
else
    dl=20;
    var_index=[2 3 6 7 20];
    var_degree(var_index)=[0.23403 0.21242 0.14690 0.10284 0.30381];
    [ch_index,ch_degree]=gen_check_dist(var_index,var_degree,code_rate)
    dr=ch_index(end);
end
var_node_degree=degree_edge_to_node(var_degree);

max_k=1000;  % ×î´óµü´ú´ÎÊý
% pe_target=1e-8;  %Ä¿±êÎóÂëÂÊ
BER_outer_code_vec=zeros(1,length(initial_exi_vec));
for ii=1:length(initial_exi_vec)
initial_exi=initial_exi_vec(ii);
sigma_ch_2=(Jinv(initial_exi))^2;

% ii
if ii==99
    xxx=1;
end
k=0;
Pe=zeros(1,max_k);
Iac=initial_exi;
while (k<max_k)
    k=k+1;
    Iec=ch_degree(ch_index)*(1-Jfunc(sqrt((ch_index-1)*(Jinv(1-Iac))^2)))';
    Iav=min([Iec 0.999999999999]);
    Iev=var_degree(var_index)*(Jfunc(sqrt((var_index-1)*(Jinv(Iav))^2+sigma_ch_2)))';
    Iac=Iev;
    
    Iev_output=var_node_degree(var_index)*(Jfunc(sqrt(var_index*(Jinv(Iav))^2+sigma_ch_2)))';
    if Iev_output==1
        if flag==0
            Pe(k)=1e-7;
            flag=1;
        else
            Pe(k)=0;
        end
        break;
    else
        sigma_out_2=(Jinv(Iev_output))^2;
        mm=sigma_out_2/2;
        Pe(k)=qfunc(sqrt(mm/2));
    end

    
%     if Pe(k)<pe_target
%         break;
%     end
%     if k>=max_k
%         break;
%     end
end
BER_outer_code_vec(ii)=Pe(k);
end %for ii
