# Supplementary material for: An Efficient Design of Systematic Rateless Codes
Source: Hindawi journal article supplement (doi:10.1155/2020/8068414), 2020-05-19
Supplement: f1 [file 8068414.f1.zip › supplementary files/Matlab_code_for_Figure1/BER_by_GA_EXIT/Find_critail_BER.m]

%%%%%%%20190808 ÕÒµ½¹Ø¼üÎóÂëÂÊ
clear;clc;
outer_code_rate_vec=0.90:0.01:0.99;
% outer_code_rate_vec=50/51;
Pe_c=[0.03:-0.00001:0.001];
initial_exi_vec=Jfunc(2*qfuncinv(Pe_c));
for ii=1:length(outer_code_rate_vec)
    outer_code_rate=outer_code_rate_vec(ii);
    BER_outer_code_vec=EXIT_BER_outcode(initial_exi_vec,outer_code_rate);
    Pe_c_vec(ii)=Pe_c(find(BER_outer_code_vec<1e-6,1))
end
