# Supplementary material for: An Efficient Design of Systematic Rateless Codes
Source: Hindawi journal article supplement (doi:10.1155/2020/8068414), 2020-05-19
Supplement: f1 [file 8068414.f1.zip › supplementary files/Matlab_code_for_Figure1/BER_by_GA_EXIT/GA_BER_outcode.m]

%%%%%%%%%%%% 20190404   ÀûÓÃ¸ßË¹½üËÆÖ±½Ó¼ÆËãLDPCÂëµÄBER  ¼ÙÉèAWGN ¡°³¬¡±ÐÅµÀ%%%%%%%%%%%%%
function BER_outer_code_vec=GA_BER_outcode(BER_inner_code_vec)


code_rate=0.98;
isirregular=0;
if isirregular==0
   dl=4;dr=200;                                                                      % ¹æÔòÂë×ÖµÄ¶È·Ö²¼
   var_index=dl;
   var_degree(var_index)=1;
   ch_index=dr;
   ch_degree(ch_index)=1;    
   code_rate=1-sum(ch_degree(ch_index)./ch_index)/sum(var_degree(var_index)./var_index);
else
    dl=20;
    var_index=[2 3 6 7 20];
    var_degree(var_index)=[0.23403 0.21242 0.14690 0.10284 0.30381];
    [ch_index,ch_degree]=gen_check_dist(var_index,var_degree,code_rate)
    dr=ch_index(end);
end


max_k=1000;  % ×î´óµü´ú´ÎÊý
% pe_target=1e-8;  %Ä¿±êÎóÂëÂÊ
BER_outer_code_vec=zeros(1,length(BER_inner_code_vec));
for ii=1:length(BER_inner_code_vec)
LT_BER=BER_inner_code_vec(ii);
inter_m=2*qfuncinv(  LT_BER  )^2;        % ÎóÂëÂÊ¶ÔÓ¦µÄ¸ßË¹±äÁ¿µÄ¾ùÖµ
% inter_sig2=2*inter_m;
% gaussian_message(ii,:)=1/sqrt(2*pi*inter_sig2)*exp(-(v-inter_m).^2/(2*inter_sig2));
% sum(gaussian_message(ii,:))
% pv_output_g=gaussian_message(ii,:);
% pv_output_g(end)=1/delta-sum(pv_output_g(1:end-1));
sigma=sqrt(2/inter_m);
sigma2=sigma^2;
Pe0=qfunc(1/sigma);

k=0;
Pe=zeros(1,max_k);
while (k<max_k)
    k=k+1;
    if k==1
        s=1/2*ch_degree(ch_index)*(1-(1-2*Pe0).^(ch_index-1))';
    else
        s=1/2*ch_degree(ch_index)*(1-(1-2*Pe(k-1)).^(ch_index-1))';
    end
    
    Q_vector=qfunc(sqrt(1/sigma2+(var_index-1)*(qfuncinv(s).^2)));
    Pe(k)=var_degree(var_index)*Q_vector';
    
%     if Pe(k)<pe_target
%         break;
%     end
%     if k>=max_k
%         break;
%     end
end
BER_outer_code_vec(ii)=Pe(k);
end %for ii
