# Supplementary material for: An Efficient Design of Systematic Rateless Codes
Source: Hindawi journal article supplement (doi:10.1155/2020/8068414), 2020-05-19
Supplement: f1 [file 8068414.f1.zip › supplementary files/Matlab_code_for_Figure1/BER_by_GA_EXIT/inv_Phi.m]

function [x]=inv_Phi(y_in)
% global struct
% 
% if y_in<10^-200
%     y_in=10^-200;
% end
%  y=log10(y_in);
%  xx=struct.x;
%  yy=struct.y;
% 
% x=xx(2)-(y-yy(2))/(yy(1)-yy(2))*(xx(2)-xx(1));

%%%%%%%%%%%%%%%%%%%%%%%
digits(100);
alpha=-0.4527;beta=0.0218;gama=0.86;
x=zeros(1,length(y_in));

a=[10 200];
b(1)=log10(sqrt(pi/a(1))*exp(-a(1)/4)*(1-10.0/7.0/a(1)));  
b(2)=log10(sqrt(pi/a(2))*exp(-a(2)/4)*(1-10.0/7.0/a(2)));
c=sqrt(pi/a(1))*exp(-a(1)/4)*(1-10.0/7.0/a(1));  % ¹Ì¶¨µã

x(y_in>=c)=((log(y_in(y_in>=c))-beta)/alpha).^(1/gama);  % Ô­ÖµÐ¡ÓÚ10µÄ¼ÆËãÊ½
x(y_in>=1)=0;   

y_in(y_in<10^-200)=10^-200;   % ¹ýÐ¡µÄÖµÒªÉèÏÞÖÆ
y=log10(y_in);
% x(y_in<c)=a(2)-(y(y_in<c)-b(2))/(b(1)-b(2))*(a(2)-a(1));  % Í¨¹ý½üËÆµÄÏßÐÔÏßÐÔ¹ØÏµ¹À¼Æ
xx=[10:0.01:100];  %Í¨¹ýÁ¿»¯Ô­º¯ÊýµÄÖµÓòÀ´¼ÆËã·´º¯Êý£¬¸ÃÏòÁ¿ÎªÁ¿»¯Çø¼äºÍ·¶Î§¡£ÎªÁË¼ÆËãËÙÂÊÖ»¿¼²ì¾ùÖµÔÚ100ÄÚµÄÖµ£¬Èç¹û³¬¹ý100Ö±½Ó¸ÄÕâ¸öÖµ¼´¿É
yy=log10(Phi(xx));

y_range=y(y_in<c);
value_vec=zeros(1,length(y_range));
for ii=1:length(y(y_in<c))
    [vv,loc]=min(abs(y_range(ii)-yy));
    value_vec(ii)=xx(loc);
end
x(y_in<c)=value_vec;

% load x_small;
% load y_small;
% y_bound_x1=Phi(1);
% y_range=y_in(y_in>y_bound_x1);
% value_vec=zeros(1,length(y_range));
% for ii=1:length(value_vec)
%     [vv,loc]=min(abs(y_range(ii)-y_small));
%     value_vec(ii)=x_small(loc);
% end
% x(y_in>y_bound_x1)=value_vec;
% x(y_in>=1)=0;   


     
