# Supplementary material for: An Efficient Design of Systematic Rateless Codes
Source: Hindawi journal article supplement (doi:10.1155/2020/8068414), 2020-05-19
Supplement: f1 [file 8068414.f1.zip › supplementary files/Matlab_code_for_Figure1/BER_by_GA_EXIT/Inv_Phi_sv.m]

function [x]=Inv_Phi_sv(y_in)
% ÕâÀïsv±íÊ¾signal value, ÊäÈë²»ÄÜÊÇÊ¸Á¿
value_vec=zeros(1,length(y_range));
for ii=1:length(y_in)
    [vv,loc]=min(abs(y_in-yy));
    value_vec(ii)=xx(loc);
end
x(y_in<c)=value_vec;
