# Supplementary material for: An Efficient Design of Systematic Rateless Codes
Source: Hindawi journal article supplement (doi:10.1155/2020/8068414), 2020-05-19
Supplement: f1 [file 8068414.f1.zip › supplementary files/Matlab_code_for_Figure1/BER_by_GA_EXIT/main_GA_BER.m]

%%%%%%%%%%%%%  20190529  ÎóÂëÂÊ¸ßË¹½üËÆ£¬PBIÐÅµÀ£¬BPSK %%%%%%%%%%%%%%%
%%%% ÔËÓÃ»ùÓÚ¸ßË¹½üËÆ½áºÏÎóÂëÂÊµÄ·½·¨¼ÆËã²¿·ÖÆµ´ø¸ÉÈÅÐÅµÀÏÂÌøÆµÏµÍ³·ÇÏµÍ³LTÂëµÄÀíÂÛÎóÂëÂÊ
% ÔÝÊ±Ö§³Ö·ÇÏµÍ³Âë
% Ö§³ÖAWGNÐÅµÀ
clear;
clc;
format short e
tic;
% close all;

code_mode=1;      % 1: ÏµÍ³Âë£¬2£¬·ÇÏµÍ³Âë
channel_mode=1;   % 1: awgn, 2:rayleigh,3: nakagami-m,4: PBIÐÅµÀ
dist_num=0
switch channel_mode
    case 3
        m=2;     % Nakagami²ÎÊý£¬Ö»Ö§³ÖÕûÊý
end
switch code_mode
    case 1
        fprintf('µ±Ç°Âë×ÖÎªÏµÍ³LTÂë\n');
    case 2
        fprintf('µ±Ç°Âë×ÖÎª·ÇÏµÍ³LTÂë\n');
    otherwise
end
switch channel_mode
    case 1
        fprintf('µ±Ç°ÐÅµÀÎªAWGNÐÅµÀ\n');
    case 2
        fprintf('µ±Ç°ÐÅµÀÎªRayleighÐÅµÀ\n');
    case 3
        fprintf('µ±Ç°ÐÅµÀÎªNakagmaiÐÅµÀ,ÇÒ²ÎÊým = %d\n',m);
    otherwise
end
switch dist_num
    case 0     % BECÏÂÓÅ»¯½á¹û
       out_node_index=[1 2 3 4 5 8 9 19 65 66]; 
       out_node_degree(out_node_index)=[0.007969 0.493570 0.166220 0.072646 0.082558 0.056058 0.037229 0.055590 0.025023 0.003135];
   end

if abs(1-sum(out_node_degree))>1e-3
    error('Êä³ö½Úµã¶È·Ö²¼Ö®ºÍÎª%2.5f£¬Çëµ÷Õû',sum(out_node_degree))
end
beta=out_node_index*out_node_degree(out_node_index)';
out_edge_degree=degree_node_to_edge(out_node_degree);
ch_degree=out_edge_degree;
ch_index=out_node_index;

rho=0
sigma_n_2=0.05  % EsN0=1/(2*sigma_n_2)£¬ÊÇÒ»¸ö¹Ì¶¨Öµ
sigma_n=sqrt(sigma_n_2);
fixed_OH=1;   % Ñ¡Ôñ¹Ì¶¨ÒëÂë¿ªÏú£¨±äÐÅÔë±È£©»¹ÊÇ¹Ì¶¨ÐÅÔë±È£¨±äÒëÂë¿ªÏú£©
if fixed_OH==1             % ¹Ì¶¨¿ªÏú£¬·ûºÅÐÅºÅ±È¿É±ä
   EsNJindB_vec=[-5:0.5:3]
   EsNJ_vec=10.^(EsNJindB_vec/10);sigma_vec=sqrt(1./(2*rho*EsNJ_vec));sigma_vec2=sigma_vec.^2;
   Length_var=length(EsNJindB_vec);
   overhead_vec=[2]
   overhead=overhead_vec;
else                       % ¹Ì¶¨ÐÅÔë±È£¬¿ªÏú¿É±ä
   sigma_vec=sqrt(0.5);    sigma=sigma_vec;
   overhead_vec=[1:0.1:3];
   Length_var=length(overhead_vec);
end
% overhead=1;
% for overhead_index=1:length(overhead_vec)
% overhead=overhead_vec(overhead_index);

    for ii=1:Length_var
    if fixed_OH==1  
        sigma=sigma_vec(ii);
    else
        overhead=overhead_vec(ii);
    end
    
alpha=beta*overhead;   % ÊäÈë£¨±äÁ¿£©½ÚµãÆ½¾ù¶ÈÊý£¬Ò²ÊÇ²´ËÉ²ÎÊý
in_node_index=1:round(alpha*3);                 % ÊäÈë½Úµã¶ÈÊý·¶Î§£¨ËäÈ»ÀíÂÛÉÏÊÇÕýÎÞÇî´ó£¬µ«ÐèÒª¸ù¾ÝÆ½¾ù¶ÈÊý½øÐÐ½Ø¶Ï£©
in_node_degree=exp(-alpha)*(alpha.^in_node_index)./gamma(in_node_index+1);   % ÊäÈë½ÚµãµÄ¶È·Ö²¼
in_node_degree(1)=in_node_degree(1)+exp(-alpha);    % °ÑÊäÈë½Úµã¶ÈÊýÎª0µÄ¸ÅÂÊ¼Óµ½¶ÈÊýÎª1µÄ¸ÅÂÊÉÏ£¨±ÜÃâÂë³¤½Ï¶ÌÊ±¶ÈÊýÎª0µÄ¸ÅÂÊ¹ý´ó£©
if abs(1-sum(in_node_degree))>1e-2
    error('ÊäÈë½Úµã¶È·Ö²¼Ö®ºÍÎª%2.5f\n,Çëµ÷Õû',sum(in_node_degree))
end
in_edge_degree=degree_node_to_edge(in_node_degree);
var_degree=in_edge_degree;
var_index=in_node_index;


max_iter_num=100;
switch channel_mode
    case 4   
      Pe0=rho*qfunc(1/sqrt(sigma^2+sigma_n^2))+(1-rho)*qfunc(1/sigma_n);
    case 2
      Pe0=1/2*(1-1/sqrt(1+2*sigma^2));
    case 3
      syms b;
      f1=sigma/(sqrt(2*b)*(1+sigma*sqrt(2*b)));
      df1=diff(f1,m-1);
      b_value=1/2/sigma^2+m;
      diff_item=double(subs(df1,b,b_value));
      Pe0=m^m*(-1)^(m-1)/prod(1:m-1)*diff_item;
    otherwise
end

if code_mode==1
    Pe=zeros(1,max_iter_num+1);
    Pe(1)=Pe0;
elseif code_mode==2
    Pe=1/2*ones(1,max_iter_num+1);
end
for kk=1:1:max_iter_num
    Pu_j_vec=1/2*(1-(1-2*Pe(kk)).^(ch_index-1)+2*(1-2*Pe(kk)).^(ch_index-1)*Pe0);   % ¶ÈÊýÎªjµÄÐ£Ñé½ÚµãÊä³öµÄ´íÎó¸ÅÂÊ
    Pu=ch_degree(ch_index)*Pu_j_vec';   % ÏÈÇóÎóÂëÂÊÆ½¾ù£¬ÔÙÇó¾ùÖµ
    mu=2*(qfuncinv(Pu))^2;
%     mu_j=2*(qfuncinv(Pu_j_vec)).^2;       % ÏÈÇó¾ùÖµ£¬ÔÙ¶Ô¾ùÖµÆ½¾ù
%     mu=ch_degree(ch_index)*mu_j';         % Ð£Ñé½ÚµãÊä³öÏûÏ¢µÄ¾ùÖµ
    mu_rec(kk)=mu;
    if code_mode==1        % ÏµÍ³Âë
    switch channel_mode         
        case 1  % AWGN
             Pv_i_vec=qfunc(sqrt(1/sigma^2+(var_index-1)*mu/2));    % ¶ÈÊýÎªiµÄ±äÁ¿½ÚµãÊä³öµÄ´íÎó¸ÅÂÊ
        case 2  % Rayleigh
             Pv_i_vec=qfunc(sqrt((var_index-1)*mu/2))-1/sqrt(1+2*sigma^2).*qfunc(sqrt((1+2*sigma^2)*(var_index-1)*mu/2)).*exp(sigma^2*(var_index-1)*mu/2);
        case 3 % Nakagami
             s=var_index-1;
             sigma2=sigma^2;
             f2=sigma/(sqrt(2*b)-2*sqrt(2)*b^(3/2)*sigma2)*exp((2*b*sigma2-1)*s*mu/4).*erfc(sqrt(b*s*mu/2)*sigma)-sigma2/(1-2*b*sigma2)*erfc(sqrt(s*mu)/2);
             df2=diff(f2,m-1);
             diff_item=double(subs(df2,b,1/2/sigma2+m));
             Pv_i_vec=m^m*(-1)^(m-1)/prod(1:m-1)*diff_item;
        otherwise
    end
    elseif code_mode==2        % ·ÇÏµÍ³Âë
       Pv_i_vec=qfunc(sqrt((var_index-1)*mu/2));                     % ¶ÔÓÚ·ÇÏµÍ³ÂëÀ´Ëµ£¬ÊäÈë½ÚµãµÄÊäÈëÏûÏ¢Ö»À´Ô´ÓÚÊä³ö½Úµã£¬ËùÒÔÊä³öÏûÏ¢¶¼ÊÇ¸ßË¹µÄ¡£
       Pe_i_vec=qfunc(sqrt((var_index)*mu/2));
    end
    Pe(kk+1)=in_node_degree(var_index)*Pe_i_vec';
%     Pv_i_vec=qfunc(sqrt(1/sigma^2+(alpha)*mu/2));
%     Pe(kk+1)=Pv_i_vec;
end
Pe_vec(ii)=Pe(end)
end
% semilogy(overhead_vec,Pe_vec);grid on;
Pe_vec
if fixed_OH==1   
   hold on;semilogy(EsNJindB_vec,Pe_vec);grid on;
else
   hold on;semilogy(overhead_vec,Pe_vec);grid on;
end

% BER_GA·½·¨¼ÆËãÍâÂëÎóÂëÂÊ
% BER_outer_code_vec_BER_GA=GA_BER_outcode(Pe_vec)    % BER_GA·½·¨
% if fixed_OH==1   
%    hold on;semilogy(EsN0indB_vec,BER_outer_code_vec_BER_GA);grid on;
% else
%    hold on;semilogy(overhead_vec,BER_outer_code_vec_BER_GA);grid on;
% end

% DDE·½·¨¼ÆËãÍâÂëÎóÂëÂÊ
% BER_outer_code_vec_DDE=DDE_outcode(Pe_vec)        % BER_DDE·½·¨
% if fixed_OH==1   
%    hold on;semilogy(EsN0indB_vec,BER_outer_code_vec_DDE);grid on;
% else
%    hold on;semilogy(overhead_vec,BER_outer_code_vec_DDE);grid on;
% end
toc;
