# Supplementary material for: An Efficient Design of Systematic Rateless Codes
Source: Hindawi journal article supplement (doi:10.1155/2020/8068414), 2020-05-19
Supplement: f1 [file 8068414.f1.zip › supplementary files/Matlab_code_for_Figure1/BER_by_GA_EXIT/main_GA_exit.m]

%%%%%%%%%%%%%  20190608  ÍâÐÅÏ¢×ªÒÆÍ¼·¨Çó½¥½øÎóÂëÂÊ %%%%%%%%%%%%%%%
clear;
clc;
format short e
tic;
% close all;

%%%%%%%%%%%%%%%%%%%%%%%%%%%%%%%%%%%%%%%%% 20190731 %%%%%%%%%%%%%%%%%%%%%%%%%%%%%%%%%%%%%%%%% ÇóÏµÍ³ÂëÎÞ¸ÉÈÅÊ±ÉèÖÃrho=0£¬code_mode=0
channel_mode=6;  %ÐÅµÀÄ£Ê½ 6£ºPBIÐÅµÀ,rho=0Ê±ÊÇÆÕÍ¨¸ßË¹ÐÅµÀ
rho=0         %¸ÉÈÅÒò×Ó
sigma_n_2=0.977^2  % EsN0=1/(2*sigma_n_2)£¬ÊÇÒ»¸ö¹Ì¶¨Öµ   ÐÅÔë±È£¬¹Ì¶¨Öµ
sigma_n=sqrt(sigma_n_2);
show_lowbound=0;

code_mode=1;      % 1: ÏµÍ³Âë£¬2£¬·ÇÏµÍ³Âë  
dist_num=2016.977
outer_code_rate=0.98
switch code_mode
    case 1
        fprintf('µ±Ç°Âë×ÖÎªÏµÍ³LTÂë\n');
    case 2
        fprintf('µ±Ç°Âë×ÖÎª·ÇÏµÍ³LTÂë\n');
    otherwise
end
switch channel_mode
    case 1
        fprintf('µ±Ç°ÐÅµÀÎªAWGNÐÅµÀ\n');
    case 2
        fprintf('µ±Ç°ÐÅµÀÎªRayleighÐÅµÀ\n');
    case 3
        fprintf('µ±Ç°ÐÅµÀÎªNakagmaiÐÅµÀ,ÇÒ²ÎÊým = %d\n',m);
    case 6
        fprintf('µ±Ç°ÐÅµÀÎªPBIÐÅµÀ,ÇÒ¸ÉÈÅÒò×Órho = %2.2f, ÔëÉù·½²îsigma_n_2=%2.2f\n',rho,sigma_n_2);
    otherwise
end
switch dist_num
    case 2019.12973  % ²âÊÔ£¬sigma_n_2=1.2973^2; alpha_star=16.5; beta=7.954198953217945;  design_OH= 2.074376074453704;     Pe_target=3.9e-3;  D=100
        out_node_index=[    4     5    29    30    53]; 
        out_node_degree(out_node_index)=[0.355538974043615   0.527142836695387   0.052969107381124   0.045664199135624   0.018684882744250]  
   case 2018.033  % 
        out_node_index=[   1 2 5 6 30 50]; 
        out_node_degree(out_node_index)=[0.01527 0.14492 0.59406 0.14058 0.07743 0.02775] 
   case 2019.298  % ²âÊÔ£¬sigma_n_2=0.977^2; alpha_star=10; beta=9.613244502733293;  design_OH= 1.040231526115532;     Pe_target=3.9e-2;  D=100
        out_node_index=[    6     7    38    39]; 
        out_node_degree(out_node_index)=[  0.846815465372582   0.045038486769935   0.000613563333579   0.107532484523904]
   case 2016.977
       out_node_index=[1:20 200];   
       out_node_degree(out_node_index)=[0.0044 0.0046 0.0055 0.0048 0.3327 0.4143 0.0875 0.0758 0.0059 0.005 0.0054 0.0059 0.0047 0.0034 0.0026 0.0012 0.001 0.0008 0.0006 0.0003 0.0332];   
   
    
    
    
    case 2016.025
       out_node_index=[1:28 200];   
       out_node_degree(out_node_index)=[0.4885 0.011 0.0042 0.2703 0.0082 0.0302 0.0256 0.0205 0.0163 0.0131 0.0107 0.0089 0.0075 0.0064 0.0056 0.0049 0.0043 0.0038 0.0033 0.0029 0.0025 0.0022 0.0019 0.0015 0.0012 0.0009 0.0006 0.0003 0.0423];
   case 2018.1
         out_node_index=[1 2 3 4 20 30]
        out_node_degree(out_node_index)=[0.00635 0.35367 0.01867 0.20177 0.38134 0.03820]
   case 2018.2
         out_node_index=[1 2 3 8 9 60]
        out_node_degree(out_node_index)=[0.00477 0.26101 0.09240 0.06913 0.51223 0.06046]
   case 2018.3
         out_node_index=[1 2 6 7 40 50]
        out_node_degree(out_node_index)=[0.00381 0.22579 0.48017 0.20647 0.05607 0.02769]
   case 2018.4
        out_node_index=[1 2 5 6 30 50]
        out_node_degree(out_node_index)=[0.01527 0.14492 0.59406 0.14058 0.07743 0.02775]
    case 2019.90  % ²âÊÔ£¬sigma_n_2=1^2; alpha_star=6.3; beta=6.196548393478924;  design_OH= 1.016695037293656;     Pe_target=2.05e-2;  D=100
        out_node_index=[     6     7   100]; 
        out_node_degree(out_node_index)=[  0.811185910758181   0.188730924680129   0.000083164561689]
    case 2019.91  % ²âÊÔ£¬sigma_n_2=1^2; alpha_star=6.4; beta=6.242812868303846;  design_OH= 1.025178895317242;     Pe_target=1.85e-2;  D=100
        out_node_index=[     6     7   100]; 
        out_node_degree(out_node_index)=[  0.759682777174350   0.240290387928035   0.000026834897615]
    case 2019.92  % ²âÊÔ£¬sigma_n_2=1^2; alpha_star=6.7; beta=6.430560812908428;  design_OH= 1.041899796134532;     Pe_target=1.62e-2;  D=100
        out_node_index=[    6     7    17]; 
        out_node_degree(out_node_index)=[  0.752611372335496   0.229071409140111   0.018317218524392]
    case 2019.93  % ²âÊÔ£¬sigma_n_2=1^2; alpha_star=7.5; beta=7.091960224166230;  design_OH= 1.057535542069646;     Pe_target=1.42e-2;  D=100
        out_node_index=[     6    23    24]; 
        out_node_degree(out_node_index)=[ 0.936107916716680   0.058097274933537   0.005794808349783]
    case 2019.94  % ²âÊÔ£¬sigma_n_2=1^2; alpha_star=7.5; beta=6.986136744622030;  design_OH= 1.073554709013325;     Pe_target=1.2e-2;  D=100
        out_node_index=[     6     7    18]; 
        out_node_degree(out_node_index)=[ 0.899031362717668   0.020498809342360   0.080469827939972]
    case 2019.95  % ²âÊÔ£¬sigma_n_2=1^2; alpha_star=8.5; beta=7.86;  design_OH= 1.081423527217835;     Pe_target=1e-2;  D=100
        out_node_index=[ 5     6    27    28 ]; 
    case 2019.96  % ²âÊÔ£¬sigma_n_2=1^2; alpha_star=8.5; beta=7.86;  design_OH= 1.090255812737360;     Pe_target=7.9e-3;  D=100
        out_node_index=[  5     6    29    30 ]; 
        out_node_degree(out_node_index)=[0.096380688735329   0.804529833538333   0.026823400239776   0.072266077486561];
    case 2019.97  % ²âÊÔ£¬sigma_n_2=1^2; alpha_star=9.8; beta=8.9587;  design_OH= 1.093905183439443;     Pe_target=5.9e-3;  D=100
        out_node_index=[   5     6    35    36]; 
        out_node_degree(out_node_index)=[0.133822399672622   0.762727038852692   0.010965526960142   0.092485034514543];
    case 2019.98  % ²âÊÔ£¬sigma_n_2=1^2; alpha_star=10; beta=8.9189;   design_OH= 1.121208630674903;     Pe_target=3.84e-3;  D=100
        out_node_index=[ 5     6    30    31 ]; 
        out_node_degree(out_node_index)=[0.143739573921700   0.728784661257046   0.124207861387834   0.003267903433419];
    case 2019.99  % ²âÊÔ£¬sigma_n_2=1^2; alpha_star=11.5; beta=10.294070404957573;  design_OH= 1.117147983994908;     Pe_target=1.9e-3;  D=100
        out_node_index=[    6     7    42    53    54]; 
        out_node_degree(out_node_index)=[0.889122899204907   0.004928345269760   0.063203711496145   0.037953667574433   0.004791376454755];
    case 2006.1     % BECÏÂÓÅ»¯½á¹û   2006Äê
       out_node_index=[1 2 3 4 5 8 9 19 65 66]; 
       out_node_degree(out_node_index)=[0.007969 0.493570 0.166220 0.072646 0.082558 0.056058 0.037229 0.055590 0.025023 0.003135];
    case 2006.2     % AWGNÐÅµÀÏÂµÄÓÅ»¯½á¹û  2006Äê
       out_node_index=[1 2 3 4 5 8 14 30 33 200]; 
       out_node_degree(out_node_index)=[0.006 0.492 0.0339 0.2403 0.006 0.095 0.049 0.018 0.0356 0.033]; 
    case 2009       % AWGNÐÅµÀÏÂµÄÓÅ»¯½á¹û 2009Äê
       out_node_index=[1 2 3 4 10 11 22 23]; 
       out_node_degree(out_node_index)=[0.00428 0.49924 0.01242 0.34367 0.04604 0.06181 0.02163 0.01091];
   case 2016     % 16Äêsigma=1µÄ
       out_node_index=[1:18 200];   
       out_node_degree(out_node_index)=[0.0036 0.0061 0.0106 0.0226 0.1337 0.6927 0.0024 0.0607 0.0097 0.0128 0.0049 0.0028 0.0013 0.0011 0.0009 0.0007 0.0005 0.0003 0.0326];
    case 0  %rho=0;  sigma_2=0.9786^2/rho;  sigma_n_2=0.2; alpha_star=4; design_OH=1.073052440506839;     Pe_target=3.9e-3;  D=100
         out_node_index=[ 1     2     3     6    20    22]; 
         out_node_degree(out_node_index)=[0.009805525152422   0.457899362327387   0.250155705178913   0.189962269895321   0.092068745187317  0.000108392258640];
    case 1  %rho=0.1;  sigma_2=0.9786^2/rho;  sigma_n_2=0.2; alpha_star=6; design_OH=1.186523325195050;     Pe_target=3.9e-3;  D=100
         out_node_index=[ 1     2     3     6     7    19    20    41]; 
         out_node_degree(out_node_index)=[0.009465017144187   0.441980549267470   0.284586409587338   0.041295864252510   0.149134625304418 0.029179586573719   0.016914300599442   0.027443647270916];
     case 2  %rho=0.2;  sigma_2=0.9786^2/rho;  sigma_n_2=0.2; alpha_star=7; design_OH=1.307019346236024;     Pe_target=3.9e-3;  D=100
         out_node_index=[  1     2     3     6     7    21    22    66]; 
         out_node_degree(out_node_index)=[0.009031699278514   0.441921257392141   0.274456714229022   0.088663306627755   0.107327426506684 0.028283320704336   0.035423699355297   0.014892575906251];
    case 3  %rho=0.3;  sigma_2=0.9786^2/rho;  sigma_n_2=0.2; alpha_star=7; design_OH=1.552126055196615;     Pe_target=3.9e-3;  D=100
         out_node_index=[ 1     2     3     6    20    21]; 
         out_node_degree(out_node_index)=[0.008441072701984   0.442959347684133   0.254874509406122   0.192090225688472   0.071370282405407 0.030264562113881];
    case 4  %rho=0.4;  sigma_2=0.9786^2/rho;  sigma_n_2=0.2; alpha_star=8; design_OH=1.552126055196615;     Pe_target=3.9e-3;  D=100
         out_node_index=[ 1     2     3     7    27    30]; 
         out_node_degree(out_node_index)=[0.008231620273421   0.429407538602354   0.291111454587820   0.201282612064433   0.031380678740125 0.038586095731848];
    case 5  %rho=0.5;  sigma_2=0.9786^2/rho;  sigma_n_2=0.2; alpha_star=9; design_OH=1.6793480082913263;     Pe_target=3.9e-3;  D=100
         out_node_index=[1     2     3     7    16    17    36    37]; 
         out_node_degree(out_node_index)=[0.008168541652653   0.421789966459759   0.297569475971661   0.196810827497701   0.008576624816521 0.017364675777948   0.034971310228782   0.014748577594976];
    case 6  %rho=0.6;  sigma_2=0.9786^2/rho;  sigma_n_2=0.2; alpha_star=10; design_OH=1.805444864998070;     Pe_target=3.9e-3;  D=100
         out_node_index=[1     2     3     6     7    19    20    47    48]; 
         out_node_degree(out_node_index)=[0.008060286117561   0.419318666560863   0.292772074318855   0.024047777318181   0.177595896280657 0.011037995861773   0.035224853371930   0.021127279399289   0.010815170770891];
    case 7  %rho=0.7;  sigma_2=0.9786^2/rho;  sigma_n_2=0.2; alpha_star=11; design_OH=1.93231;     Pe_target=3.9e-3;  D=100
         out_node_index=[1     2     3     6     7    19    20    52]; 
         out_node_degree(out_node_index)=[0.008284133258143   0.414876030601071   0.290060212042895   0.043589540852983   0.160704511559508 0.017631471240997   0.034669737899770   0.030184362544633];
    case 8  %rho=0.8;  sigma_2=0.9786^2/rho;  sigma_n_2=0.2; alpha_star=12; design_OH=2.056610692627418;     Pe_target=3.9e-3;  D=100
         out_node_index=[1     2     3     6     7    19    60    61]; 
         out_node_degree(out_node_index)=[0.008326834600353   0.413548375186018   0.281712756867690   0.100805040921411   0.104399455408394 0.065018010691023   0.014248842793918   0.011940683531194];
    case 9  %rho=0.9;  sigma_2=0.9786^2/rho;  sigma_n_2=0.2; alpha_star=12; design_OH=2.176516868440137;     Pe_target=3.9e-3;  D=100
         out_node_index=[1     2     3     7     8    17    32    33]; 
         out_node_degree(out_node_index)=[0.008622378194542   0.399650992849585   0.306169588653717   0.164062652219411   0.051267852378477 0.004311943885342   0.020102813165672   0.045811778653253];
    case 10  %rho=1;  sigma_2=0.9786^2/rho;  sigma_n_2=0.2; alpha_star=13; design_OH=2.291276700998076;     Pe_target=3.9e-3;  D=100
         out_node_index=[  1     2     3     6     7    18    44    45]; 
         out_node_degree(out_node_index)=[0.009112491874858   0.394908961365106   0.305661106723131   0.029558130140968   0.173362864316664 0.050335763384526   0.006884258444683   0.030176423750064];
%     case 6  %rho=0.7;  sigma_2=0.9786^2/rho;  sigma_n_2=0.05; alpha_star=10; design_OH=1.813;     Pe_target=3.9e-3;  D=100
%          out_node_index=[1     2     3     6     7    17    43    44]; 
%          out_node_degree(out_node_index)=[0.008632128072728   0.417088836350263   0.290816423779794   0.063279969100152   0.133215631182812 0.049150237693675   0.013897093465783   0.023919680354792];
       
end

if abs(1-sum(out_node_degree))>1e-3
    error('Êä³ö½Úµã¶È·Ö²¼Ö®ºÍÎª%2.5f£¬Çëµ÷Õû',sum(out_node_degree))
end
beta=out_node_index*out_node_degree(out_node_index)';
out_edge_degree=degree_node_to_edge(out_node_degree);
ch_degree=out_edge_degree;
ch_index=out_node_index;


fixed_OH=0;   % Ñ¡Ôñ¹Ì¶¨ÒëÂë¿ªÏú£¨±äÐÅÔë±È£©»¹ÊÇ¹Ì¶¨ÐÅÔë±È£¨±äÒëÂë¿ªÏú£©
if fixed_OH==1             % ¹Ì¶¨¿ªÏú£¬·ûºÅÐÅºÅ±È¿É±ä
   EsNJindB_vec=[-5:0.5:3];
   EsNJ_vec=10.^(EsNJindB_vec/10);sigma_vec=sqrt(1./(2*rho*EsNJ_vec));sigma_vec2=sigma_vec.^2;
   Length_var=length(EsNJindB_vec);
   overhead_vec=[2]
   overhead=overhead_vec;
else                       % ¹Ì¶¨ÐÅÔë±È£¬¿ªÏú¿É±ä
   sigma_vec=sqrt(0.9786^2/rho);
   if rho==0      % ±ÜÃâ³öÏÖInfÖµ
    sigma_vec=10;  % Öµ¿ÉÒÔËæÒâÉèÖÃ
   end
   sigma=sigma_vec;
   switch dist_num
       case 2019.12973  % ²âÊÔ£¬sigma_n_2=1.2973^2; alpha_star=16.5; beta=7.954198953217945;  design_OH= 2.074376074453704;     Pe_target=3.9e-3;  D=100
            overhead_vec=[1.5:0.05:2.05 2.06:0.01:2.09 2.1:0.05:2.5];
       case 2018.033  % 
            overhead_vec=[1.5:0.05:2.1 2.11:0.01:2.14  2.15:0.05:2.5];
       case 2019.298  % ²âÊÔ£¬sigma_n_2=0.977^2; alpha_star=10; beta=9.613244502733293;  design_OH= 1.040231526115532;     Pe_target=3.9e-2;  D=100
            overhead_vec=[0.5:0.05:1 1.04 1.0405  1.05 1.1:0.05:1.8]
       case 2016.977
           overhead_vec=[0.5:0.05:2];
%              overhead_vec=[1.21:0.01:1.25];
   end
   Length_var=length(overhead_vec);
end

Pe_vec=zeros(1,Length_var);
for ii=1:Length_var
    if fixed_OH==1  
        sigma=sigma_vec(ii);
    else
        overhead=overhead_vec(ii);
    end
    
alpha=beta*overhead;   % ÊäÈë£¨±äÁ¿£©½ÚµãÆ½¾ù¶ÈÊý£¬Ò²ÊÇ²´ËÉ²ÎÊý
if overhead<1.5
    in_node_index=1:round(alpha*10);
else
in_node_index=1:round(alpha*5);                 % ÊäÈë½Úµã¶ÈÊý·¶Î§£¨ËäÈ»ÀíÂÛÉÏÊÇÕýÎÞÇî´ó£¬µ«ÐèÒª¸ù¾ÝÆ½¾ù¶ÈÊý½øÐÐ½Ø¶Ï£©
end
in_node_degree=exp(-alpha)*(alpha.^in_node_index)./gamma(in_node_index+1);   % ÊäÈë½ÚµãµÄ¶È·Ö²¼
in_node_degree(1)=in_node_degree(1)+exp(-alpha);    % °ÑÊäÈë½Úµã¶ÈÊýÎª0µÄ¸ÅÂÊ¼Óµ½¶ÈÊýÎª1µÄ¸ÅÂÊÉÏ£¨±ÜÃâÂë³¤½Ï¶ÌÊ±¶ÈÊýÎª0µÄ¸ÅÂÊ¹ý´ó£©
if abs(1-sum(in_node_degree))>1e-3
    error('ÊäÈë½Úµã¶È·Ö²¼Ö®ºÍÎª%2.5f\n,Çëµ÷Õû',sum(in_node_degree))
end
in_edge_degree=degree_node_to_edge(in_node_degree);
var_degree=in_edge_degree;
var_index=in_node_index;
dv=var_index(end);


% hold on;plot(var_degree);
% %ÕâÊÇÍ¨¹ý¶þÏî·Ö²¼µÃµ½µÄLTÂë¶È·Ö²¼£¬ºÍ²´ËÉ·Ö²¼µÄ½üËÆ£¬µ«²»ÍêÈ«Ò»Ñù£¬¶Ô×îºóµÄ½á¹ûÓÐÇáÎ¢µÄÓ°Ïì£¬¿ÉºöÂÔ
% k=100
% k1=round(k/outer_code_rate);
% % n=k/code_rate
% n=round(k1*overhead)
% var_node_degree=zeros(1,length(in_edge_degree));
% for ii=1:length(var_node_degree)
%     var_node_degree(ii)=nchoosek(n,ii)*(beta/k1)^ii*(1-beta/k1)^(n-ii);
% end
% var_degree=degree_node_to_edge(var_node_degree);
% hold on;plot(var_degree);

% nchoosek_num=zeros(dv,dv);
% for iii=1:dv
%     for kkk=1:iii
%         nchoosek_num(iii,kkk)=nchoosek(iii,kkk);
%     end
% end

max_iter_num=1000;
% e=1;mu=0;mean_v=0;
sigma_ch_2_1 = Jinv( 1-Jfunc(sqrt(4/(sigma^2+sigma_n^2))) )^2;
sigma_ch_2_2 = Jinv( 1-Jfunc(sqrt(4/sigma_n^2)) )^2;
sigma_ch_2_2_v=4/sigma_n^2;
if code_mode==1
    Iac=Jfunc(sqrt(sigma_ch_2_2))';    % 20191002,ÕâÀïÓ¦¸ÃÊÇsigma_ch_2_2_v£¬¶ø²»ÊÇsigma_ch_2_2¡£×îºóµÄ½á¹û¿ÉÄÜÓ°Ïì²»´ó¡£
end
for kk=1:1:max_iter_num
     switch code_mode
           case 1    % ÏµÍ³LTÂë
           sigma_C_2=(Jinv(1-Iac))^2;
           Iec_j=rho*(1-Jfunc(sqrt((ch_index-1)*sigma_C_2+sigma_ch_2_1)))+(1-rho)*(1-Jfunc(sqrt((ch_index-1)*sigma_C_2+sigma_ch_2_2)));
           Iec=ch_degree(ch_index)*Iec_j';
           Iec_rec(kk)=Iec;
           case 2    % ·ÇÏµÍ³LTÂë
           if kk==1
            Iec=ch_degree(1)*(rho*(1-Jfunc(sqrt(sigma_ch_2_1)))+(1-rho)*(1-Jfunc(sqrt(sigma_ch_2_2))));  % µÚÒ»´Îµü´úÊ±sigma_C_2Ç÷ÏòÓÚÎÞÇî´ó
            Iec_rec(kk)=Iec;
           else 
             sigma_C_2=(Jinv(1-Iac))^2;
             Iec_j=rho*(1-Jfunc(sqrt((ch_index-1)*sigma_C_2+sigma_ch_2_1)))+(1-rho)*(1-Jfunc(sqrt((ch_index-1)*sigma_C_2+sigma_ch_2_2)));
             Iec=ch_degree(ch_index)*Iec_j';
             Iec_rec(kk)=Iec;
           end           
     end
     Iav=Iec;
     sigma_V=Jinv(Iav);
     switch code_mode
         case 1  % ÏµÍ³Âë
         Iev=var_degree(var_index)*Jfunc(sqrt(sigma_ch_2_2_v+(var_index-1)*sigma_V^2))';
         case 2
         Iev=var_degree(var_index)*Jfunc(sqrt((var_index-1)*sigma_V^2))';
     end
     Iac=Iev;
     
     switch code_mode
         case 1
          mu=sigma_V^2/2;
          mu_rec(kk)=mu;
          Pe(kk)=in_node_degree(var_index)*qfunc(sqrt(sigma_ch_2_2_v/2/2+var_index*mu/2))';
          Iev_output=in_node_degree(var_index)*Jfunc(sqrt(sigma_ch_2_2_v+var_index*sigma_V^2))';

         case 2
          mu=sigma_V^2/2;
          mu_rec(kk)=mu;
          Pe(kk)=in_node_degree(var_index)*qfunc(sqrt(var_index*mu/2))';
          Iev_output=in_node_degree(var_index)*Jfunc(sqrt(var_index*sigma_V^2))';
     end
end
Pe_vec(ii)=Pe(end);
Iev_output_vec(ii)=Iev_output;
% Plb(ii)=in_node_degree(var_index)*(rho*qfunc(sqrt(var_index/sigma_ch_2_1))+(1-rho)*qfunc(sqrt(var_index/sigma_ch_2_2)))';
     mJ=2/(sigma^2+sigma_n^2);
     mn=2/sigma_n^2;

if show_lowbound==1
for iii=1:length(var_index)
    Plb_i(iii)=0;
    for kkk=0:iii
        Plb_i(iii)=Plb_i(iii)+nchoosek(iii,kkk)*rho^kkk*(1-rho)^(iii-kkk)*qfunc(sqrt((kkk*mJ+(iii-kkk)*mn)/2));
    end
end
Plb(ii)=in_node_degree(var_index)*Plb_i';
end

% Y0=1;
% Y(1)=var_degree(var_index)*((1-ch_degree(ch_index)*((1-Y0).^(ch_index-1))').^(var_index-1))';
% for kkk=2:1000
%     Y(kkk)=var_degree(var_index)*((1-ch_degree(ch_index)*((1-Y(kkk-1)).^(ch_index-1))').^(var_index-1))';
% end
% Y_vec(ii)=Y(end);
end
% semilogy(overhead_vec,Pe_vec);grid on;
% Pe_vec
if fixed_OH==1   
   hold on;semilogy(EsNJindB_vec,Pe_vec);grid on;
   if show_lowbound==1
   hold on;semilogy(EsNJindB_vec,Plb);grid on;
   end
else
   hold on;semilogy(overhead_vec,Pe_vec);grid on;
   if show_lowbound==1
   hold on;semilogy(overhead_vec,Plb);grid on;
   end
end


% BER_GA·½·¨¼ÆËãÍâÂëÎóÂëÂÊ
BER_outer_code_vec_BER_GA=EXIT_BER_outcode(Iev_output_vec,outer_code_rate)    % BER_GA·½·¨
if fixed_OH==1   
   hold on;semilogy(EsN0indB_vec,BER_outer_code_vec_BER_GA);grid on;
else
   hold on;semilogy(overhead_vec,BER_outer_code_vec_BER_GA,'o-');grid on;
end

% DDE·½·¨¼ÆËãÍâÂëÎóÂëÂÊ
% BER_outer_code_vec_DDE=DDE_outcode(Pe_vec)        % BER_DDE·½·¨
% if fixed_OH==1   
%    hold on;semilogy(EsN0indB_vec,BER_outer_code_vec_DDE);grid on;
% else
%    hold on;semilogy(overhead_vec,BER_outer_code_vec_DDE);grid on;
% end
toc;
