# Supplementary material for: An Efficient Design of Systematic Rateless Codes
Source: Hindawi journal article supplement (doi:10.1155/2020/8068414), 2020-05-19
Supplement: f1 [file 8068414.f1.zip › supplementary files/Matlab_code_for_Figure1/BER_by_GA_EXIT/main_GA_tradi.m]

%%%%%%%%%%%%%  20190518  ´«Í³¾ùÖµ¸ßË¹½üËÆ£¬²»¿¼ÂÇÀëÉ¢ºÍÁ¬Ðø %%%%%%%%%%%%%%%
% 20190511  ÏÈÖ»ÌÖÂÛ·ÇÏµÍ³ÂëºÍAWGNÐÅµÀ
clear;
clc;
format short e
tic;
% close all;


channel_mode=2;  %ÐÅµÀÄ£Ê½ 1:BECÐÅµÀ,2£ºBEC_AWGNÐÅµÀ,3¡¢ÈðÀûË¥ÂäÐÅµÀ,4¡¢NakagamiÐÅµÀ£¬5¡¢ÀµË¹ÐÅµÀ£¬6£ºPBIÐÅµÀ
rho=0
sigma_n_2=1^2  % EsN0=1/(2*sigma_n_2)£¬ÊÇÒ»¸ö¹Ì¶¨Öµ
sigma_n=sqrt(sigma_n_2);

code_mode=1;      % 1: ÏµÍ³Âë£¬2£¬·ÇÏµÍ³Âë  
channel_mode=1;   % 1: awgn, 2:rayleigh,3: nakagami-m
dist_num=2016.977
switch channel_mode
    case 3
        m=2;     % Nakagami²ÎÊý£¬Ö»Ö§³ÖÕûÊý
end
switch code_mode
    case 1
        fprintf('µ±Ç°Âë×ÖÎªÏµÍ³LTÂë\n');
    case 2
        fprintf('µ±Ç°Âë×ÖÎª·ÇÏµÍ³LTÂë\n');
    otherwise
end
switch channel_mode
    case 1
        fprintf('µ±Ç°ÐÅµÀÎªAWGNÐÅµÀ\n');
    case 2
        fprintf('µ±Ç°ÐÅµÀÎªRayleighÐÅµÀ\n');
    case 3
        fprintf('µ±Ç°ÐÅµÀÎªNakagmaiÐÅµÀ,ÇÒ²ÎÊým = %d\n',m);
    otherwise
end
switch dist_num
    case 0     % BECÏÂÓÅ»¯½á¹û
       out_node_index=[1 2 3 4 5 8 9 19 65 66]; 
       out_node_degree(out_node_index)=[0.007969 0.493570 0.166220 0.072646 0.082558 0.056058 0.037229 0.055590 0.025023 0.003135];
    case 2016.977
       out_node_index=[1:20 200];   
       out_node_degree(out_node_index)=[0.0044 0.0046 0.0055 0.0048 0.3327 0.4143 0.0875 0.0758 0.0059 0.005 0.0054 0.0059 0.0047 0.0034 0.0026 0.0012 0.001 0.0008 0.0006 0.0003 0.0332];
end

if abs(1-sum(out_node_degree))>1e-2
    error('Êä³ö½Úµã¶È·Ö²¼Ö®ºÍÎª%2.5f£¬Çëµ÷Õû',sum(out_node_degree))
end
beta=out_node_index*out_node_degree(out_node_index)';
out_edge_degree=degree_node_to_edge(out_node_degree);
ch_degree=out_edge_degree;
ch_index=out_node_index;


fixed_OH=0;   % Ñ¡Ôñ¹Ì¶¨ÒëÂë¿ªÏú£¨±äÐÅÔë±È£©»¹ÊÇ¹Ì¶¨ÐÅÔë±È£¨±äÒëÂë¿ªÏú£©
if fixed_OH==1             % ¹Ì¶¨¿ªÏú£¬·ûºÅÐÅºÅ±È¿É±ä
   EsNJindB_vec=[-5:0.5:3];
   EsNJ_vec=10.^(EsNJindB_vec/10);sigma_vec=sqrt(1./(2*rho*EsNJ_vec));sigma_vec2=sigma_vec.^2;
   Length_var=length(EsNJindB_vec);
   overhead_vec=[2]
   overhead=overhead_vec;
else                       % ¹Ì¶¨ÐÅÔë±È£¬¿ªÏú¿É±ä
   sigma_vec=sqrt(1);    sigma=sigma_vec;
   overhead_vec=[1:0.1:3];
   Length_var=length(overhead_vec);
end
% overhead=1;
% for overhead_index=1:length(overhead_vec)
% overhead=overhead_vec(overhead_index);

for ii=1:Length_var
    if fixed_OH==1  
        sigma=sigma_vec(ii);
    else
        overhead=overhead_vec(ii);
    end
    
alpha=beta*overhead;   % ÊäÈë£¨±äÁ¿£©½ÚµãÆ½¾ù¶ÈÊý£¬Ò²ÊÇ²´ËÉ²ÎÊý
in_node_index=1:round(alpha*3);                 % ÊäÈë½Úµã¶ÈÊý·¶Î§£¨ËäÈ»ÀíÂÛÉÏÊÇÕýÎÞÇî´ó£¬µ«ÐèÒª¸ù¾ÝÆ½¾ù¶ÈÊý½øÐÐ½Ø¶Ï£©
in_node_degree=exp(-alpha)*(alpha.^in_node_index)./gamma(in_node_index+1);   % ÊäÈë½ÚµãµÄ¶È·Ö²¼
in_node_degree(1)=in_node_degree(1)+exp(-alpha);    % °ÑÊäÈë½Úµã¶ÈÊýÎª0µÄ¸ÅÂÊ¼Óµ½¶ÈÊýÎª1µÄ¸ÅÂÊÉÏ£¨±ÜÃâÂë³¤½Ï¶ÌÊ±¶ÈÊýÎª0µÄ¸ÅÂÊ¹ý´ó£©
if abs(1-sum(in_node_degree))>1e-4
    error('ÊäÈë½Úµã¶È·Ö²¼Ö®ºÍÎª%2.5f\n,Çëµ÷Õû',sum(in_node_degree))
end
in_edge_degree=degree_node_to_edge(in_node_degree);
var_degree=in_edge_degree;
var_index=in_node_index;
dv=var_index(end);

% nchoosek_num=zeros(dv,dv);
% for iii=1:dv
%     for kkk=1:iii
%         nchoosek_num(iii,kkk)=nchoosek(iii,kkk);
%     end
% end

max_iter_num=200;

e=1;mu=0;mean_v=0;
for kk=1:1:max_iter_num
       
%      mu_j=inv_Phi(1-(1-Phi(2/sigma^2))*(mean_v).^(ch_index-1));
     mu_j=rho*inv_Phi(1-(1-Phi(2/(sigma^2+sigma_n^2)))*(mean_v).^(ch_index-1))+(1-rho)*inv_Phi(1-(1-Phi(2/sigma_n^2))*(mean_v).^(ch_index-1));
     
     mu=ch_degree(ch_index)*mu_j';
     mu_rec(kk)=mu;
    
     mean_v=var_degree*(1-Phi(2/sigma_n^2+(var_index-1)*mu))';
   
     Pe(kk)=in_node_degree(var_index)*qfunc(sqrt(var_index*mu/2))';
end
Pe_vec(ii)=Pe(end)

% Y0=1;
% Y(1)=var_degree(var_index)*((1-ch_degree(ch_index)*((1-Y0).^(ch_index-1))').^(var_index-1))';
% for kkk=2:1000
%     Y(kkk)=var_degree(var_index)*((1-ch_degree(ch_index)*((1-Y(kkk-1)).^(ch_index-1))').^(var_index-1))';
% end
% Y_vec(ii)=Y(end);


end
% semilogy(overhead_vec,Pe_vec);grid on;
% Pe_vec
if fixed_OH==1   
   hold on;semilogy(EsNJindB_vec,Pe_vec);grid on;
else
   hold on;semilogy(overhead_vec,Pe_vec);grid on;
end


% BER_GA·½·¨¼ÆËãÍâÂëÎóÂëÂÊ
% BER_outer_code_vec_BER_GA=GA_BER_outcode(Pe_vec)    % BER_GA·½·¨
% if fixed_OH==1   
%    hold on;semilogy(EsN0indB_vec,BER_outer_code_vec_BER_GA);grid on;
% else
%    hold on;semilogy(overhead_vec,BER_outer_code_vec_BER_GA);grid on;
% end

% DDE·½·¨¼ÆËãÍâÂëÎóÂëÂÊ
% BER_outer_code_vec_DDE=DDE_outcode(Pe_vec)        % BER_DDE·½·¨
% if fixed_OH==1   
%    hold on;semilogy(EsN0indB_vec,BER_outer_code_vec_DDE);grid on;
% else
%    hold on;semilogy(overhead_vec,BER_outer_code_vec_DDE);grid on;
% end
toc;
