# Supplementary material for: An Efficient Design of Systematic Rateless Codes
Source: Hindawi journal article supplement (doi:10.1155/2020/8068414), 2020-05-19
Supplement: f1 [file 8068414.f1.zip › supplementary files/Matlab_code_for_Figure1/BER_by_GA_EXIT/main_GA_two_type_msg.m]

%%%%%%%%%%%%%  20190511  ¾ùÖµ¸ßË¹½üËÆ %%%%%%%%%%%%%%%
% 20190511  ÏÈÖ»ÌÖÂÛ·ÇÏµÍ³ÂëºÍAWGNÐÅµÀ
% 20190529 ¸ù¾Ý³õ²½ÑéÖ¤£¬ºÍÔ­Ê¼µÄ¸ßË¹½üËÆ-¾ùÖµ·½·¨½á¹ûÒ»Ñù£¬ÒòÎªÔÚµü´úºóÆÚ»ù±¾¶¼ÊÇ·Ç¿Õ½Úµã
clear;
clc;
format short e
tic;
% close all;

code_mode=2;      % 1: ÏµÍ³Âë£¬2£¬·ÇÏµÍ³Âë  
channel_mode=1;   % 1: awgn, 2:rayleigh,3: nakagami-m
dist_num=0
switch channel_mode
    case 3
        m=2;     % Nakagami²ÎÊý£¬Ö»Ö§³ÖÕûÊý
end
switch code_mode
    case 1
        fprintf('µ±Ç°Âë×ÖÎªÏµÍ³LTÂë\n');
    case 2
        fprintf('µ±Ç°Âë×ÖÎª·ÇÏµÍ³LTÂë\n');
    otherwise
end
switch channel_mode
    case 1
        fprintf('µ±Ç°ÐÅµÀÎªAWGNÐÅµÀ\n');
    case 2
        fprintf('µ±Ç°ÐÅµÀÎªRayleighÐÅµÀ\n');
    case 3
        fprintf('µ±Ç°ÐÅµÀÎªNakagmaiÐÅµÀ,ÇÒ²ÎÊým = %d\n',m);
    otherwise
end
switch dist_num
    case 0     % BECÏÂÓÅ»¯½á¹û
       out_node_index=[1 2 3 4 5 8 9 19 65 66]; 
       out_node_degree(out_node_index)=[0.007969 0.493570 0.166220 0.072646 0.082558 0.056058 0.037229 0.055590 0.025023 0.003135];
    case 1
       out_node_index=[1 2 3 4 5 8 14 30 33 200]; 
       out_node_degree(out_node_index)=[0.006 0.492 0.0339 0.2403 0.006 0.095 0.049 0.018 0.0356 0.033]; 
end

if abs(1-sum(out_node_degree))>1e-2
    error('Êä³ö½Úµã¶È·Ö²¼Ö®ºÍÎª%2.5f£¬Çëµ÷Õû',sum(out_node_degree))
end
beta=out_node_index*out_node_degree(out_node_index)';
out_edge_degree=degree_node_to_edge(out_node_degree);
ch_degree=out_edge_degree;
ch_index=out_node_index;


fixed_OH=0;   % Ñ¡Ôñ¹Ì¶¨ÒëÂë¿ªÏú£¨±äÐÅÔë±È£©»¹ÊÇ¹Ì¶¨ÐÅÔë±È£¨±äÒëÂë¿ªÏú£©
if fixed_OH==1             % ¹Ì¶¨¿ªÏú£¬·ûºÅÐÅºÅ±È¿É±ä
   EsN0indB_vec=[-5:0.5:3];
   EsN0_vec=10.^(EsN0indB_vec/10);sigma_vec=sqrt(1./(2*EsN0_vec));sigma_vec2=sigma_vec.^2;
   Length_var=length(EsN0indB_vec);
   overhead_vec=[2]
   overhead=overhead_vec;
else                       % ¹Ì¶¨ÐÅÔë±È£¬¿ªÏú¿É±ä
   sigma_vec=sqrt(1);    sigma=sigma_vec;
   overhead_vec=[1.5:0.1:3];
   Length_var=length(overhead_vec);
end
% overhead=1;
% for overhead_index=1:length(overhead_vec)
% overhead=overhead_vec(overhead_index);

for ii=1:Length_var
    if fixed_OH==1  
        sigma=sigma_vec(ii);
    else
        overhead=overhead_vec(ii);
    end
    
alpha=beta*overhead;   % ÊäÈë£¨±äÁ¿£©½ÚµãÆ½¾ù¶ÈÊý£¬Ò²ÊÇ²´ËÉ²ÎÊý
in_node_index=1:round(alpha*3);                 % ÊäÈë½Úµã¶ÈÊý·¶Î§£¨ËäÈ»ÀíÂÛÉÏÊÇÕýÎÞÇî´ó£¬µ«ÐèÒª¸ù¾ÝÆ½¾ù¶ÈÊý½øÐÐ½Ø¶Ï£©
in_node_degree=exp(-alpha)*(alpha.^in_node_index)./gamma(in_node_index+1);   % ÊäÈë½ÚµãµÄ¶È·Ö²¼
in_node_degree(1)=in_node_degree(1)+exp(-alpha);    % °ÑÊäÈë½Úµã¶ÈÊýÎª0µÄ¸ÅÂÊ¼Óµ½¶ÈÊýÎª1µÄ¸ÅÂÊÉÏ£¨±ÜÃâÂë³¤½Ï¶ÌÊ±¶ÈÊýÎª0µÄ¸ÅÂÊ¹ý´ó£©
if abs(1-sum(in_node_degree))>1e-4
    error('ÊäÈë½Úµã¶È·Ö²¼Ö®ºÍÎª%2.5f\n,Çëµ÷Õû',sum(in_node_degree))
end
in_edge_degree=degree_node_to_edge(in_node_degree);
var_degree=in_edge_degree;
var_index=in_node_index;
dv=var_index(end);

nchoosek_num=zeros(dv,dv);
for iii=1:dv
    for kkk=1:iii
        nchoosek_num(iii,kkk)=nchoosek(iii,kkk);
    end
end

max_iter_num=200;

e=1;mu=0;mean_v=0;
for kk=1:1:max_iter_num
    epsilon_j=1-(1-e).^(ch_index(2:end)-1);
    epsilon=ch_degree(ch_index(2:end))*epsilon_j';
    epsilon_rec(kk)=epsilon;
%     mu_j=inv_Phi(1-tanh(2/sigma^2)*(mean_v/(1-e)).^(ch_index(2:end)-1));
    mu_j=inv_Phi(1-(1-Phi(2/sigma^2))*(mean_v/(1-e)).^(ch_index(2:end)-1));
    mu=ch_degree(1)*2/sigma^2+ch_degree(ch_index(2:end))*mu_j';
%     mu=ch_degree(1)*2/sigma^2+ch_degree(ch_index(2:end))*((1-epsilon_j).*mu_j)'/(1-epsilon);
%      mu=ch_degree(1)*2/sigma^2+ch_degree(ch_index(2:end))*((1-epsilon_j).*mu_j)';
    mu_rec(kk)=mu;
    
    
    e_i=epsilon.^(var_index(2:end)-1);
    e=var_degree(1)+var_degree(var_index(2:end))*e_i';
    e_rec(kk)=e;
    mean_v_i=zeros(1,dv);
    for i=2:dv
        for k=1:i-1
            mean_v_i(i)=mean_v_i(i)+nchoosek_num(i-1,k)*epsilon^(i-1-k)*(1-epsilon)^k*(1-Phi(k*mu));
        end
    end
    mean_v=var_degree(var_index(2:end))*mean_v_i(2:end)';
    mean_v_rec(kk)=mean_v;
    
    E_i=epsilon.^var_index;
    Pe_i=zeros(1,dv);
    for i=1:dv
        for k=1:i
            Pe_i(i)=Pe_i(i)+nchoosek_num(i,k)*epsilon^(i-k)*(1-epsilon)^k*qfunc(sqrt(k*mu/2));
        end
    end
    Pe(kk)=in_node_degree(var_index)*E_i'/2+in_node_degree(var_index)*Pe_i';
end
Pe_vec(ii)=Pe(end)
e_vec(ii)=e_rec(end)

% Y0=1;
% Y(1)=var_degree(var_index)*((1-ch_degree(ch_index)*((1-Y0).^(ch_index-1))').^(var_index-1))';
% for kkk=2:1000
%     Y(kkk)=var_degree(var_index)*((1-ch_degree(ch_index)*((1-Y(kkk-1)).^(ch_index-1))').^(var_index-1))';
% end
% Y_vec(ii)=Y(end);


end
% semilogy(overhead_vec,Pe_vec);grid on;
% Pe_vec
if fixed_OH==1   
   hold on;semilogy(EsN0indB_vec,Pe_vec);grid on;
else
   hold on;semilogy(overhead_vec,Pe_vec);grid on;
end


% BER_GA·½·¨¼ÆËãÍâÂëÎóÂëÂÊ
% BER_outer_code_vec_BER_GA=GA_BER_outcode(Pe_vec)    % BER_GA·½·¨
% if fixed_OH==1   
%    hold on;semilogy(EsN0indB_vec,BER_outer_code_vec_BER_GA);grid on;
% else
%    hold on;semilogy(overhead_vec,BER_outer_code_vec_BER_GA);grid on;
% end

% DDE·½·¨¼ÆËãÍâÂëÎóÂëÂÊ
% BER_outer_code_vec_DDE=DDE_outcode(Pe_vec)        % BER_DDE·½·¨
% if fixed_OH==1   
%    hold on;semilogy(EsN0indB_vec,BER_outer_code_vec_DDE);grid on;
% else
%    hold on;semilogy(overhead_vec,BER_outer_code_vec_DDE);grid on;
% end
toc;
