# Supplementary material for: An Efficient Design of Systematic Rateless Codes
Source: Hindawi journal article supplement (doi:10.1155/2020/8068414), 2020-05-19
Supplement: f1 [file 8068414.f1.zip › supplementary files/Matlab_code_for_Figure1/BER_by_GA_EXIT/Phi.m]

function [y]=Phi(x)
alpha=-0.4527;beta=0.0218;gama=0.86;
y=zeros(1,length(x));     % ÏòÁ¿ÐÎÊ½

% load x_small;
% load y_small;
% x_range=x(x<1);
% value_vec=zeros(1,length(x_range));
% for ii=1:length(value_vec)
%     [vv,loc]=min(abs(x_range(ii)-x_small));
%     value_vec(ii)=y_small(loc);
% end
% y(x<1)=value_vec;

% y(1<=x & x<=10)=exp(alpha*(x(1<=x & x<=10).^gama)+beta);
y(x<=10)=exp(alpha*(x(x<=10).^gama)+beta);
y(x==0)=1;
y(x>10)=sqrt(pi./x(x>10)).*exp(-x(x>10)/4).*(1-10/7./x(x>10));
y(x>200)=0;
y(y>=1)=1;
