# Supplementary material for: An Efficient Design of Systematic Rateless Codes
Source: Hindawi journal article supplement (doi:10.1155/2020/8068414), 2020-05-19
Supplement: f1 [file 8068414.f1.zip › supplementary files/Matlab_code_for_Figure1/BER_by_GA_EXIT/Phi_small_mean.m]

x=0.0001:0.0001:1;
delta_u=0.0001;
u=-20:delta_u:20;
y=zeros(1,length(x));
for x_index=1:length(x)
    y(x_index)=1-1/sqrt(4*pi*x(x_index))*sum(tanh(u/2).*exp(-(u-x(x_index)).^2/(4*x(x_index))))*delta_u;
end
