# Supplementary material for: An Efficient Design of Systematic Rateless Codes
Source: Hindawi journal article supplement (doi:10.1155/2020/8068414), 2020-05-19
Supplement: f1 [file 8068414.f1.zip › supplementary files/Matlab_code_for_Figure1/BER_by_GA_EXIT/Q_ray_inv.m]

function x=Q_ray_inv(y,alpha,sigma)
cc=1:1:9;
xx=[];
for ii=-8:1:-6
    xx=[xx cc*10^(ii)];
end
xx=[xx 0.00001:0.00001:10];
yy=Q_ray(xx,alpha,sigma);

for ii=1:length(y)
    [vv,loc]=min(abs(y(ii)-yy));
    x(ii)=xx(loc);
end
