# Supplementary material for: An Efficient Design of Systematic Rateless Codes
Source: Hindawi journal article supplement (doi:10.1155/2020/8068414), 2020-05-19
Supplement: f1 [file 8068414.f1.zip › supplementary files/Matlab_code_for_Figure1/BER_by_GA_EXIT/relationship_alpha_pe_Iec.m]

%%%%%%%%%%20190613 PBIÐÅµÀÏÂalpha£¬peºÍÐ£Ñé½ÚµãÊä³ö»¥ÐÅÏ¢µÄÏà»¥¹ØÏµ %%%%%%%%%
rho=0.7          %¸ÉÈÅÒò×Ó
sigma_2=0.9786^2/rho;
sigma_n_2=0.05;
sigma_ch_2_2 = Jinv( 1-Jfunc(sqrt(4/sigma_n^2)) )^2;  
Iec_max=rho*Jfunc(sqrt(4/(sigma_2+sigma_n_2)))+(1-rho)*(Jfunc(4/sigma_n_2))
Iec_vec=[0.001:0.001:Iec_max];

alpha_vec=[3:1:12];
for ii=1:length(alpha_vec)
    alpha=alpha_vec(ii);
    in_node_index=1:round(alpha*5);                 % ÊäÈë½Úµã¶ÈÊý·¶Î§£¨ËäÈ»ÀíÂÛÉÏÊÇÕýÎÞÇî´ó£¬µ«ÐèÒª¸ù¾ÝÆ½¾ù¶ÈÊý½øÐÐ½Ø¶Ï£©
    in_node_degree=exp(-alpha)*(alpha.^in_node_index)./gamma(in_node_index+1);   % ÊäÈë½ÚµãµÄ¶È·Ö²¼
    in_node_degree(1)=in_node_degree(1)+exp(-alpha);    % °ÑÊäÈë½Úµã¶ÈÊýÎª0µÄ¸ÅÂÊ¼Óµ½¶ÈÊýÎª1µÄ¸ÅÂÊÉÏ£¨±ÜÃâÂë³¤½Ï¶ÌÊ±¶ÈÊýÎª0µÄ¸ÅÂÊ¹ý´ó£©
    if abs(1-sum(in_node_degree))>1e-4
        error('ÊäÈë½Úµã¶È·Ö²¼Ö®ºÍÎª%2.5f\n,Çëµ÷Õû',sum(in_node_degree))
    end
    in_edge_degree=degree_node_to_edge(in_node_degree);
    var_degree=in_edge_degree;
    var_index=in_node_index;
    dv=var_index(end);
    for  jj=1:length(Iec_vec)
         Iec=Iec_vec(jj);
         Pe(ii,jj)=in_node_degree(var_index)*qfunc(sqrt(var_index*(Jinv(Iec))^2/4))';
    end
end
semilogy(Iec_vec,Pe);xlabel('I_e_c'),ylabel('Pe')
target_pe=3.84e-3
hold on;plot([0 Iec_max],[target_pe target_pe],'--')
