# Supplementary material for: An Efficient Design of Systematic Rateless Codes
Source: Hindawi journal article supplement (doi:10.1155/2020/8068414), 2020-05-19
Supplement: f1 [file 8068414.f1.zip › supplementary files/Matlab_code_for_Figure1/BER_by_GA_EXIT/test.txt]

ÖÆ±í³É¹¦

ii =

     1


ans =

  19.611668844970179


outer_code_BER_g =

   0.002617498671087

main_BER_GA
µ±Ç°Âë×ÖÎªÏµÍ³LTÂë
µ±Ç°ÐÅµÀÎªRayleighÐÅµÀ

out_node_index =

     4     5    29    30   200


out_node_degree =

  1 ÖÁ 5 ÁÐ

                   0                   0                   0   0.452859016237929   0.409613577056910

  6 ÖÁ 10 ÁÐ

                   0                   0                   0                   0                   0

  11 ÖÁ 15 ÁÐ

                   0                   0                   0                   0                   0

  16 ÖÁ 20 ÁÐ

                   0                   0                   0                   0                   0

  21 ÖÁ 25 ÁÐ

                   0                   0                   0                   0                   0

  26 ÖÁ 30 ÁÐ

                   0                   0                   0   0.015888918955500   0.077850509480061

  31 ÖÁ 35 ÁÐ

                   0                   0                   0                   0                   0

  36 ÖÁ 40 ÁÐ

                   0                   0                   0                   0                   0

  41 ÖÁ 45 ÁÐ

                   0                   0                   0                   0                   0

  46 ÖÁ 50 ÁÐ

                   0                   0                   0                   0                   0

  51 ÖÁ 55 ÁÐ

                   0                   0                   0                   0                   0

  56 ÖÁ 60 ÁÐ

                   0                   0                   0                   0                   0

  61 ÖÁ 65 ÁÐ

                   0                   0                   0                   0                   0

  66 ÖÁ 70 ÁÐ

                   0                   0                   0                   0                   0

  71 ÖÁ 75 ÁÐ

                   0                   0                   0                   0                   0

  76 ÖÁ 80 ÁÐ

                   0                   0                   0                   0                   0

  81 ÖÁ 85 ÁÐ

                   0                   0                   0                   0                   0

  86 ÖÁ 90 ÁÐ

                   0                   0                   0                   0                   0

  91 ÖÁ 95 ÁÐ

                   0                   0                   0                   0                   0

  96 ÖÁ 100 ÁÐ

                   0                   0                   0                   0                   0

  101 ÖÁ 105 ÁÐ

                   0                   0                   0                   0                   0

  106 ÖÁ 110 ÁÐ

                   0                   0                   0                   0                   0

  111 ÖÁ 115 ÁÐ

                   0                   0                   0                   0                   0

  116 ÖÁ 120 ÁÐ

                   0                   0                   0                   0                   0

  121 ÖÁ 125 ÁÐ

                   0                   0                   0                   0                   0

  126 ÖÁ 130 ÁÐ

                   0                   0                   0                   0                   0

  131 ÖÁ 135 ÁÐ

                   0                   0                   0                   0                   0

  136 ÖÁ 140 ÁÐ

                   0                   0                   0                   0                   0

  141 ÖÁ 145 ÁÐ

                   0                   0                   0                   0                   0

  146 ÖÁ 150 ÁÐ

                   0                   0                   0                   0                   0

  151 ÖÁ 155 ÁÐ

                   0                   0                   0                   0                   0

  156 ÖÁ 160 ÁÐ

                   0                   0                   0                   0                   0

  161 ÖÁ 165 ÁÐ

                   0                   0                   0                   0                   0

  166 ÖÁ 170 ÁÐ

                   0                   0                   0                   0                   0

  171 ÖÁ 175 ÁÐ

                   0                   0                   0                   0                   0

  176 ÖÁ 180 ÁÐ

                   0                   0                   0                   0                   0

  181 ÖÁ 185 ÁÐ

                   0                   0                   0                   0                   0

  186 ÖÁ 190 ÁÐ

                   0                   0                   0                   0                   0

  191 ÖÁ 195 ÁÐ

                   0                   0                   0                   0                   0

  196 ÖÁ 200 ÁÐ

                   0                   0                   0                   0   0.043787978269600

{Î´¶¨Òåº¯Êý»ò±äÁ¿ 'DDE_outcode'¡£

³ö´í <a href="matlab:matlab.internal.language.introspective.errorDocCallback('main_BER_GA', 'E:\Ñ§Êõ\ÂÛÎÄ\20190331ÅçÈªÂëË¥ÂäÐÅµÀ_GA·½·¨\³ÌÐò\GA-BER\main_BER_GA.m', 204)" style="font-weight:bold">main_BER_GA</a> (<a href="matlab: opentoline('E:\Ñ§Êõ\ÂÛÎÄ\20190331ÅçÈªÂëË¥ÂäÐÅµÀ_GA·½·¨\³ÌÐò\GA-BER\main_BER_GA.m',204,0)">line 204</a>)
BER_outer_code_vec=DDE_outcode(Pe_vec)
} 
opentoline('E:\Ñ§Êõ\ÂÛÎÄ\20190331ÅçÈªÂëË¥ÂäÐÅµÀ_GA·½·¨\³ÌÐò\GA-BER\main_BER_GA.m',204,0)
main_BER_GA
µ±Ç°Âë×ÖÎªÏµÍ³LTÂë
µ±Ç°ÐÅµÀÎªRayleighÐÅµÀ

out_node_index =

     4     5    29    30   200


out_node_degree =

  1 ÖÁ 5 ÁÐ

                   0                   0                   0   0.452859016237929   0.409613577056910

  6 ÖÁ 10 ÁÐ

                   0                   0                   0                   0                   0

  11 ÖÁ 15 ÁÐ

                   0                   0                   0                   0                   0

  16 ÖÁ 20 ÁÐ

                   0                   0                   0                   0                   0

  21 ÖÁ 25 ÁÐ

                   0                   0                   0                   0                   0

  26 ÖÁ 30 ÁÐ

                   0                   0                   0   0.015888918955500   0.077850509480061

  31 ÖÁ 35 ÁÐ

                   0                   0                   0                   0                   0

  36 ÖÁ 40 ÁÐ

                   0                   0                   0                   0                   0

  41 ÖÁ 45 ÁÐ

                   0                   0                   0                   0                   0

  46 ÖÁ 50 ÁÐ

                   0                   0                   0                   0                   0

  51 ÖÁ 55 ÁÐ

                   0                   0                   0                   0                   0

  56 ÖÁ 60 ÁÐ

                   0                   0                   0                   0                   0

  61 ÖÁ 65 ÁÐ

                   0                   0                   0                   0                   0

  66 ÖÁ 70 ÁÐ

                   0                   0                   0                   0                   0

  71 ÖÁ 75 ÁÐ

                   0                   0                   0                   0                   0

  76 ÖÁ 80 ÁÐ

                   0                   0                   0                   0                   0

  81 ÖÁ 85 ÁÐ

                   0                   0                   0                   0                   0

  86 ÖÁ 90 ÁÐ

                   0                   0                   0                   0                   0

  91 ÖÁ 95 ÁÐ

                   0                   0                   0                   0                   0

  96 ÖÁ 100 ÁÐ

                   0                   0                   0                   0                   0

  101 ÖÁ 105 ÁÐ

                   0                   0                   0                   0                   0

  106 ÖÁ 110 ÁÐ

                   0                   0                   0                   0                   0

  111 ÖÁ 115 ÁÐ

                   0                   0                   0                   0                   0

  116 ÖÁ 120 ÁÐ

                   0                   0                   0                   0                   0

  121 ÖÁ 125 ÁÐ

                   0                   0                   0                   0                   0

  126 ÖÁ 130 ÁÐ

                   0                   0                   0                   0                   0

  131 ÖÁ 135 ÁÐ

                   0                   0                   0                   0                   0

  136 ÖÁ 140 ÁÐ

                   0                   0                   0                   0                   0

  141 ÖÁ 145 ÁÐ

                   0                   0                   0                   0                   0

  146 ÖÁ 150 ÁÐ

                   0                   0                   0                   0                   0

  151 ÖÁ 155 ÁÐ

                   0                   0                   0                   0                   0

  156 ÖÁ 160 ÁÐ

                   0                   0                   0                   0                   0

  161 ÖÁ 165 ÁÐ

                   0                   0                   0                   0                   0

  166 ÖÁ 170 ÁÐ

                   0                   0                   0                   0                   0

  171 ÖÁ 175 ÁÐ

                   0                   0                   0                   0                   0

  176 ÖÁ 180 ÁÐ

                   0                   0                   0                   0                   0

  181 ÖÁ 185 ÁÐ

                   0                   0                   0                   0                   0

  186 ÖÁ 190 ÁÐ

                   0                   0                   0                   0                   0

  191 ÖÁ 195 ÁÐ

                   0                   0                   0                   0                   0

  196 ÖÁ 200 ÁÐ

                   0                   0                   0                   0   0.043787978269600

ÖÆ±í³É¹¦
{Î´¶¨Òåº¯Êý»ò±äÁ¿ 'BER_outer_code_vec'¡£

³ö´í <a href="matlab:matlab.internal.language.introspective.errorDocCallback('DDE_outcode', 'E:\Ñ§Êõ\ÂÛÎÄ\20190331ÅçÈªÂëË¥ÂäÐÅµÀ_GA·½·¨\³ÌÐò\GA-BER\DDE_outcode.m', 23)" style="font-weight:bold">DDE_outcode</a> (<a href="matlab: opentoline('E:\Ñ§Êõ\ÂÛÎÄ\20190331ÅçÈªÂëË¥ÂäÐÅµÀ_GA·½·¨\³ÌÐò\GA-BER\DDE_outcode.m',23,0)">line 23</a>)
BER_outer_code_vec=zeros(1,length(BER_outer_code_vec));

³ö´í <a href="matlab:matlab.internal.language.introspective.errorDocCallback('main_BER_GA', 'E:\Ñ§Êõ\ÂÛÎÄ\20190331ÅçÈªÂëË¥ÂäÐÅµÀ_GA·½·¨\³ÌÐò\GA-BER\main_BER_GA.m', 204)" style="font-weight:bold">main_BER_GA</a> (<a href="matlab: opentoline('E:\Ñ§Êõ\ÂÛÎÄ\20190331ÅçÈªÂëË¥ÂäÐÅµÀ_GA·½·¨\³ÌÐò\GA-BER\main_BER_GA.m',204,0)">line 204</a>)
BER_outer_code_vec=DDE_outcode(Pe_vec)
} 
opentoline('E:\Ñ§Êõ\ÂÛÎÄ\20190331ÅçÈªÂëË¥ÂäÐÅµÀ_GA·½·¨\³ÌÐò\GA-BER\main_BER_GA.m',204,0)
opentoline('E:\Ñ§Êõ\ÂÛÎÄ\20190331ÅçÈªÂëË¥ÂäÐÅµÀ_GA·½·¨\³ÌÐò\GA-BER\DDE_outcode.m',23,0)
main_BER_GA
µ±Ç°Âë×ÖÎªÏµÍ³LTÂë
µ±Ç°ÐÅµÀÎªRayleighÐÅµÀ

out_node_index =

     4     5    29    30   200


out_node_degree =

  1 ÖÁ 5 ÁÐ

                   0                   0                   0   0.452859016237929   0.409613577056910

  6 ÖÁ 10 ÁÐ

                   0                   0                   0                   0                   0

  11 ÖÁ 15 ÁÐ

                   0                   0                   0                   0                   0

  16 ÖÁ 20 ÁÐ

                   0                   0                   0                   0                   0

  21 ÖÁ 25 ÁÐ

                   0                   0                   0                   0                   0

  26 ÖÁ 30 ÁÐ

                   0                   0                   0   0.015888918955500   0.077850509480061

  31 ÖÁ 35 ÁÐ

                   0                   0                   0                   0                   0

  36 ÖÁ 40 ÁÐ

                   0                   0                   0                   0                   0

  41 ÖÁ 45 ÁÐ

                   0                   0                   0                   0                   0

  46 ÖÁ 50 ÁÐ

                   0                   0                   0                   0                   0

  51 ÖÁ 55 ÁÐ

                   0                   0                   0                   0                   0

  56 ÖÁ 60 ÁÐ

                   0                   0                   0                   0                   0

  61 ÖÁ 65 ÁÐ

                   0                   0                   0                   0                   0

  66 ÖÁ 70 ÁÐ

                   0                   0                   0                   0                   0

  71 ÖÁ 75 ÁÐ

                   0                   0                   0                   0                   0

  76 ÖÁ 80 ÁÐ

                   0                   0                   0                   0                   0

  81 ÖÁ 85 ÁÐ

                   0                   0                   0                   0                   0

  86 ÖÁ 90 ÁÐ

                   0                   0                   0                   0                   0

  91 ÖÁ 95 ÁÐ

                   0                   0                   0                   0                   0

  96 ÖÁ 100 ÁÐ

                   0                   0                   0                   0                   0

  101 ÖÁ 105 ÁÐ

                   0                   0                   0                   0                   0

  106 ÖÁ 110 ÁÐ

                   0                   0                   0                   0                   0

  111 ÖÁ 115 ÁÐ

                   0                   0                   0                   0                   0

  116 ÖÁ 120 ÁÐ

                   0                   0                   0                   0                   0

  121 ÖÁ 125 ÁÐ

                   0                   0                   0                   0                   0

  126 ÖÁ 130 ÁÐ

                   0                   0                   0                   0                   0

  131 ÖÁ 135 ÁÐ

                   0                   0                   0                   0                   0

  136 ÖÁ 140 ÁÐ

                   0                   0                   0                   0                   0

  141 ÖÁ 145 ÁÐ

                   0                   0                   0                   0                   0

  146 ÖÁ 150 ÁÐ

                   0                   0                   0                   0                   0

  151 ÖÁ 155 ÁÐ

                   0                   0                   0                   0                   0

  156 ÖÁ 160 ÁÐ

                   0                   0                   0                   0                   0

  161 ÖÁ 165 ÁÐ

                   0                   0                   0                   0                   0

  166 ÖÁ 170 ÁÐ

                   0                   0                   0                   0                   0

  171 ÖÁ 175 ÁÐ

                   0                   0                   0                   0                   0

  176 ÖÁ 180 ÁÐ

                   0                   0                   0                   0                   0

  181 ÖÁ 185 ÁÐ

                   0                   0                   0                   0                   0

  186 ÖÁ 190 ÁÐ

                   0                   0                   0                   0                   0

  191 ÖÁ 195 ÁÐ

                   0                   0                   0                   0                   0

  196 ÖÁ 200 ÁÐ

                   0                   0                   0                   0   0.043787978269600

ÖÆ±í³É¹¦

ans =

  20.000000000000014


BER_outer_code_vec =

  1 ÖÁ 5 ÁÐ

   0.195762700539803                   0                   0                   0                   0

  6 ÖÁ 7 ÁÐ

                   0                   0


ans =

  20.000000000000014


BER_outer_code_vec =

  1 ÖÁ 5 ÁÐ

   0.195762700539803   0.193727625099713                   0                   0                   0

  6 ÖÁ 7 ÁÐ

                   0                   0


ans =

  20.000000000000014


BER_outer_code_vec =

  1 ÖÁ 5 ÁÐ

   0.195762700539803   0.193727625099713   0.191542623532939                   0                   0

  6 ÖÁ 7 ÁÐ

                   0                   0


ans =

  20.000000000000018


BER_outer_code_vec =

  1 ÖÁ 5 ÁÐ

   0.195762700539803   0.193727625099713   0.191542623532939   0.189178618255608                   0

  6 ÖÁ 7 ÁÐ

                   0                   0


ans =

  19.999999999999993


BER_outer_code_vec =

  1 ÖÁ 5 ÁÐ

   0.195762700539803   0.193727625099713   0.191542623532939   0.189178618255608   0.186597073083366

  6 ÖÁ 7 ÁÐ

                   0                   0


ans =

  20.000000000000007


BER_outer_code_vec =

  1 ÖÁ 5 ÁÐ

   0.195762700539803   0.193727625099713   0.191542623532939   0.189178618255608   0.186597073083366

  6 ÖÁ 7 ÁÐ

   0.183745064995146                   0


ans =

  20.000000000000011


BER_outer_code_vec =

  1 ÖÁ 5 ÁÐ

   0.195762700539803   0.193727625099713   0.191542623532939   0.189178618255608   0.186597073083366

  6 ÖÁ 7 ÁÐ

   0.183745064995146   0.180546575129778


BER_outer_code_vec =

  1 ÖÁ 5 ÁÐ

   0.195762700539803   0.193727625099713   0.191542623532939   0.189178618255608   0.186597073083366

  6 ÖÁ 7 ÁÐ

   0.183745064995146   0.180546575129778

Ê±¼äÒÑ¹ý 1807.675266 Ãë¡£
Pe_vec

Pe_vec =

  1 ÖÁ 5 ÁÐ

   0.195745903489450   0.193711077145693   0.191526340319046   0.189162618377652   0.186581379023514

  6 ÖÁ 7 ÁÐ

   0.183729704538522   0.180531583629774

main_BER_GA
µ±Ç°Âë×ÖÎªÏµÍ³LTÂë
µ±Ç°ÐÅµÀÎªRayleighÐÅµÀ

out_node_index =

     4     5    29    30   200


out_node_degree =

  1 ÖÁ 5 ÁÐ

                   0                   0                   0   0.452859016237929   0.409613577056910

  6 ÖÁ 10 ÁÐ

                   0                   0                   0                   0                   0

  11 ÖÁ 15 ÁÐ

                   0                   0                   0                   0                   0

  16 ÖÁ 20 ÁÐ

                   0                   0                   0                   0                   0

  21 ÖÁ 25 ÁÐ

                   0                   0                   0                   0                   0

  26 ÖÁ 30 ÁÐ

                   0                   0                   0   0.015888918955500   0.077850509480061

  31 ÖÁ 35 ÁÐ

                   0                   0                   0                   0                   0

  36 ÖÁ 40 ÁÐ

                   0                   0                   0                   0                   0

  41 ÖÁ 45 ÁÐ

                   0                   0                   0                   0                   0

  46 ÖÁ 50 ÁÐ

                   0                   0                   0                   0                   0

  51 ÖÁ 55 ÁÐ

                   0                   0                   0                   0                   0

  56 ÖÁ 60 ÁÐ

                   0                   0                   0                   0                   0

  61 ÖÁ 65 ÁÐ

                   0                   0                   0                   0                   0

  66 ÖÁ 70 ÁÐ

                   0                   0                   0                   0                   0

  71 ÖÁ 75 ÁÐ

                   0                   0                   0                   0                   0

  76 ÖÁ 80 ÁÐ

                   0                   0                   0                   0                   0

  81 ÖÁ 85 ÁÐ

                   0                   0                   0                   0                   0

  86 ÖÁ 90 ÁÐ

                   0                   0                   0                   0                   0

  91 ÖÁ 95 ÁÐ

                   0                   0                   0                   0                   0

  96 ÖÁ 100 ÁÐ

                   0   
