# Supplementary material for: An Efficient Design of Systematic Rateless Codes
Source: Hindawi journal article supplement (doi:10.1155/2020/8068414), 2020-05-19
Supplement: f1 [file 8068414.f1.zip › supplementary files/Matlab_code_for_Figure1/BER_by_GA_EXIT/test_keshan.m]

clear;clc;
ch_index=1:10;
sigma=0.9786;
mean_Z=2/sigma^2;
mean_v_vec=0:0.01:15;
mu_j(1,1:length(mean_v_vec))=mean_Z;
for ii=1:length(mean_v_vec)
    mean_v=mean_v_vec(ii);
    for jj=ch_index(2:end)
        Z_vec=sqrt(2*mean_Z)*randn(1,10000)+mean_Z;    
        X_mat=sqrt(2*mean_v)*randn(jj-1,10000)+mean_v;
        mu_j(jj,ii)=mean(2*atanh(tanh(Z_vec/2).*prod(tanh(X_mat/2),1)));
    end
end
plot(mean_v_vec,mu_j')
grid on;
