# Supplementary material for: An Efficient Design of Systematic Rateless Codes
Source: Hindawi journal article supplement (doi:10.1155/2020/8068414), 2020-05-19
Supplement: f1 [file 8068414.f1.zip › supplementary files/Matlab_code_for_Figure1/BER_by_GA_mean/C2_BPSK.m]

function result=C2_BPSK(EsNj)
Es=1;
Nj_vec=Es./EsNj;
delta=0.001;
y=-40:delta:60;
result=zeros(1,length(Nj_vec));
for ii=1:length(EsNj)
    Nj=Nj_vec(ii);
    inte_value=1/sqrt(pi*Nj)*exp(-(y-sqrt(Es)).^2/Nj).*log2(2./(1+exp(-4*y*sqrt(Es)/Nj)));
    result(ii)=sum(inte_value)*delta;
end;

result=min(ones(1,length(result)),result);
