# Supplementary material for: An Efficient Design of Systematic Rateless Codes
Source: Hindawi journal article supplement (doi:10.1155/2020/8068414), 2020-05-19
Supplement: f1 [file 8068414.f1.zip › supplementary files/Matlab_code_for_Figure1/BER_by_GA_mean/degree_node_to_edge.m]

function edge_degree=degree_node_to_edge(node_degree)
% 20180421 »ùÓÚÒò×ÓÍ¼µÄÂë×Ö£¬½Úµã¶È·Ö²¼×ª»»Îª±ß·Ö²¼
% ¹«Ê½£¬2011-Error floor Analysis of LT Codes over the Additive White Gaussian
% Noise Channel Ê½£¨9£©
% ÊäÈëÎª½ÚµãµÄ¶È·Ö²¼£¬Êä³öÎª±ßµÄ¶È·Ö²¼
ii_vec=find(node_degree~=0);
edge_degree(ii_vec)=ii_vec.*node_degree(ii_vec)/(ii_vec*node_degree(ii_vec)');
