# Supplementary material for: An Efficient Design of Systematic Rateless Codes
Source: Hindawi journal article supplement (doi:10.1155/2020/8068414), 2020-05-19
Supplement: f1 [file 8068414.f1.zip › supplementary files/Matlab_code_for_Figure1/BER_by_GA_mean/f_j_mu.m]

function mu_R_j=f_j_mu(j_vec,mu_Q,sigma_n)
mu_R_j=inv_Phi(       1-         (1-Phi(2/sigma_n^2)) * (1-Phi(mu_Q)).^(j_vec-1)       );
