# Supplementary material for: An Efficient Design of Systematic Rateless Codes
Source: Hindawi journal article supplement (doi:10.1155/2020/8068414), 2020-05-19
Supplement: f1 [file 8068414.f1.zip › supplementary files/Matlab_code_for_Figure1/BER_by_GA_mean/fd_fun.m]

function output_mean_mat=fd_fun(sigma,d_vec,input_mean)
% sigma=0.9786;
mu_0=2/sigma^2;
var_0=2*mu_0;
Z_vec=mu_0+sqrt(var_0)*randn(1,100000);
output_mean_vec=zeros(1,length(d_vec));
output_mean_vec(1)=mu_0;
d_vec_2=d_vec(2:end);
mu_vec=input_mean;
output_mean_mat=zeros(length(d_vec),length(mu_vec));
for dd=1:length(d_vec)
    d=d_vec(dd);
    for kk=1:length(mu_vec)
        mu=mu_vec(kk);
        X_vec=mu+sqrt(2*mu)*randn(d-1,100000);
        output_mean_mat(dd,kk)=mean(2*atanh(   tanh(Z_vec/2).*prod(tanh(X_vec/2),1)   ));
%         X_vec=mu+sqrt(2*mu)*randn(1,100000);
%         output_mean_mat(dd,kk)=mean(2*atanh(   tanh(Z_vec/2).*tanh(X_vec/2).^(d-1)   ));
    end
end
% hold on;plot(mu_vec,output_mean_mat,':');
% output_mean=mean(2*atanh(   tanh(Z_vec/2)   ))
