# Supplementary material for: An Efficient Design of Systematic Rateless Codes
Source: Hindawi journal article supplement (doi:10.1155/2020/8068414), 2020-05-19
Supplement: f1 [file 8068414.f1.zip › supplementary files/Matlab_code_for_Figure1/BER_by_GA_mean/gene_rsd_dist.m]

function [out_node_dist, average_degree]=gene_rsd_dist(K,c,delta) 
% 20180407   Éú³ÉÂ³°î¹Â×Ó·Ö²¼£¬¼´ÏàÓ¦LTÂë¡°Êä³ö½Úµã¡±µÄ½Úµã¶È·Ö²¼
% c=0.1;        % ¶È·Ö²¼¾ùÖµ£¬ÌØ¶¨²ÎÊý
%         delta=0.5;    % ÔÊÐíÒëÂëÊ§°ÜµÄ¸ÅÂÊ¼«Öµ
        R_SD=c*log(K/delta)*sqrt(K);
        rho=zeros(1,K);
        thu=zeros(1,K);
        d=1:K;
        rho(1)=1/K;
        rho(2:K)=1./(d(2:end).*(d(2:end)-1));
        loc=floor(K/R_SD-1);
        thu(1:loc)=R_SD/K./d(1:loc);
        thu(loc+1)=R_SD/K*log(R_SD/delta);
        Z=sum(rho+thu);
        out_node_dist=(rho+thu)/Z;
        degree_num=[1:K];
        average_degree=degree_num*out_node_dist';
        fprintf('µ±Ç°LTÂëµÄÊä³ö½Úµã¶ÈÊýÂú×ãRSD·Ö²¼£¬Æä×î´ó¶ÈÊýÎª%d,¶È·Ö²¼Ö®ºÍÎª%2.5f£¬Æ½¾ù¶ÈÊýÎª%2.5f\n',K,sum(out_node_dist),average_degree);
