# Supplementary material for: An Efficient Design of Systematic Rateless Codes
Source: Hindawi journal article supplement (doi:10.1155/2020/8068414), 2020-05-19
Supplement: f1 [file 8068414.f1.zip › supplementary files/Matlab_code_for_Figure1/BER_by_GA_mean/initial_message.m]

% 20170408 ³õÊ¼ÏûÏ¢  %%%
%%%%%%%%% 20170216 ²úÉú³õÊ¼ÏûÏ¢ %%%%%%%%%%
clear;
clc;
close;
%%%%% ÐÅµÀ²ÎÊýÉèÖÃ   %%%%
modulation_way=0;   % 0:BPSK 1:BFSK  Ñ¡Ôñµ÷ÖÆ·½Ê½
epsilon_vec=1;      % ±»¸ÉÈÅµÄ¸ÅÂÊ
EbN0indB=2;        % ÐÅÔë±È
EbNjindB=2;         % ÐÅ¸É±È
include_noise=0;    % ÊÇ·ñ°üº¬±³¾°ÔëÉù
if modulation_way==0
combining_select=1    %  ¶ÔÓÚBFSK£¬Ñ¡Ôñ²»Í¬µÄºÏ²¢·½·¨¡ª¡ª1£ºMLºÏ²¢,2£ºMLºÏ²¢µÚÒ»ÖÖ½üËÆÊ½,3:MLºÏ²¢µÚ¶þÖÖ½üËÆ 4£ºÆ½·½ÂÉÏßÐÔºÏ²¢£¬5£º³Ë»ýºÏ²¢£¬
diversity_level=1  % ·Ö¼¯¼¶Êý
end;
channel_mode=1      % 0: AWGNÐÅµÀ£¬1£ºricianÐÅµÀ£¬2£ºRayleighÐÅµÀ
if channel_mode==1
    gamma=10;        % ricianÐÅµÀÊ±µÄ²ÎÊý£¨Ö±Éä·ÖÁ¿ÓëÉ¢Éä·ÖÁ¿±ÈÖµ£©
elseif channel_mode==2
    gamma=0;
end;
code_rate=1/2;

rho=epsilon_vec;
%%%%%% ÏûÏ¢·¶Î§ÉèÖÃ  %%%%%%%%
delta=0.01;  %Á¿»¯¼ä¸ô
v_max=60;       % ·¶Î§²»ÄÜÌ«Ð¡£¬ÒòÎªµü´úºópvµÄ·Ö²¼»áÏò½Ï´óµÄvÖµ£¨Èç40-50£©¡°ÒÆ¶¯¡±£¬Ì«Ð¡µÄ»°»á¡°¸²¸Ç¡±²»È«
v_min=-20;
v_range=[v_min delta v_max];
v=[v_min:delta:v_max];

a_delta=0.01;
a_vec=[a_delta:a_delta:20];                                      % À³Ë¹»òÈðÀûÐÅµÀË¥ÂäÏµÊý²ÉÑùÖµ
[vv,aa]=meshgrid(v,a_vec);

%%%%%   ÐÅÔë±È ÐÅ¸É±È ¼ÆËã    %%%%%
EbN0=10^(EbN0indB/10);
Es=1;
Eb=Es/code_rate;
N0=Eb/EbN0;
sigma_0=sqrt(N0*Es/2);

EbNj=10^(EbNjindB/10);
Es=1;
Eb=Es/code_rate;
Nj=Eb/EbNj/rho;
sigma_j=sqrt(Nj*Es/2);     % ±»¸ÉÈÅ²¿·ÖµÄ¸ÉÈÅ±ê×¼²î
sigma=sqrt(sigma_j^2+sigma_0^2);   % ±»¸ÉÈÅ²¿·ÖµÄ¸ÉÈÅ+ÔëÉùÖ®ºÍµÄ±ê×¼²î


%%%%%%% BPSK %%%%%%%%%%%

pv_init=rho*sigma/sqrt(8*pi)*exp(-(2-sigma^2*v).^2/8/sigma^2)+(1-rho)*sigma_0/sqrt(8*pi)*exp(-(2-sigma_0^2*v).^2/8/sigma_0^2);
hold on;plot(v,pv_init,'k--');
fprintf('AWGNÏÂµÄ¹éÒ»»¯ÃÜ¶ÈºÍÎª%2.5e\n',sum(pv_init)*delta);

pv_init_mat1=sigma/sqrt(2*pi)*exp(-(vv-2*aa.^2/sigma^2).^2./(8*aa.^2/sigma^2))*(1+gamma).*exp(-aa.^2*(1+gamma)-gamma).*besseli(0,2*aa*sqrt(gamma*(1+gamma)));  % rician »òÕßrayleighÐÅµÀ
pv_init_mat2=sigma_0/sqrt(2*pi)*exp(-(vv-2*aa.^2/sigma_0^2).^2./(8*aa.^2/sigma_0^2))*(1+gamma).*exp(-aa.^2*(1+gamma)-gamma).*besseli(0,2*aa*sqrt(gamma*(1+gamma)));
%          pv_init_mat=sigma/sqrt(2*pi)*exp(-(vv-2*aa.^2/sigma^2).^2./(8*aa.^2/sigma^2)).*exp(-aa.^2);
pv_init=rho*sum(pv_init_mat1,1)*a_delta+(1-rho)*sum(pv_init_mat2,1)*a_delta;
hold on;plot(v,pv_init,'k-');
fprintf('RicianÏÂµÄ¹éÒ»»¯ÃÜ¶ÈºÍÎª%2.5e, gamma=%2.2f\n',sum(pv_init)*delta,gamma);

gamma=0;
pv_init_mat1=sigma/sqrt(2*pi)*exp(-(vv-2*aa.^2/sigma^2).^2./(8*aa.^2/sigma^2))*(1+gamma).*exp(-aa.^2*(1+gamma)-gamma).*besseli(0,2*aa*sqrt(gamma*(1+gamma)));  % rician »òÕßrayleighÐÅµÀ
pv_init_mat2=sigma_0/sqrt(2*pi)*exp(-(vv-2*aa.^2/sigma_0^2).^2./(8*aa.^2/sigma_0^2))*(1+gamma).*exp(-aa.^2*(1+gamma)-gamma).*besseli(0,2*aa*sqrt(gamma*(1+gamma)));
pv_init=rho*sum(pv_init_mat1,1)*a_delta+(1-rho)*sum(pv_init_mat2,1)*a_delta;
hold on;plot(v,pv_init,'k-.');
fprintf('RayleighÏÂµÄ¹éÒ»»¯ÃÜ¶ÈºÍÎª%2.5e\n',sum(pv_init)*delta);

% pv_init_mat1=sigma/sqrt(2*pi)*exp(-(vv-2*aa.^2/sigma^2).^2./(8*aa.^2/sigma^2)).*exp(-aa.^2);
% pv_init_mat2=sigma_0/sqrt(2*pi)*exp(-(vv-2*aa.^2/sigma_0^2).^2./(8*aa.^2/sigma_0^2)).*exp(-aa.^2);
% pv_init=rho*sum(pv_init_mat1,1)*a_delta+(1-rho)*sum(pv_init_mat2,1)*a_delta;
% hold on;plot(v,pv_init,'b');
box;
legend('AWGN','Rician','Rayleigh');
ylabel('Density');
