# Supplementary material for: An Efficient Design of Systematic Rateless Codes
Source: Hindawi journal article supplement (doi:10.1155/2020/8068414), 2020-05-19
Supplement: f1 [file 8068414.f1.zip › supplementary files/Matlab_code_for_Figure1/BER_by_GA_mean/keshan.m]

N=20000;
Ri=1/2;
K=N*Ri;
a=5.5;
for ii=1:40
aita(ii)=nchoosek(N,ii)*(a/K)^ii*(1-a/K)^(N-ii);
end
plot(1:40,aita);

a=11;
ii=1:40;
vi=exp(-a)*a.^ii./gamma(ii+1);
hold on; plot(ii,vi,'r')
