# Supplementary material for: An Efficient Design of Systematic Rateless Codes
Source: Hindawi journal article supplement (doi:10.1155/2020/8068414), 2020-05-19
Supplement: f1 [file 8068414.f1.zip › supplementary files/Matlab_code_for_Figure1/BER_by_GA_mean/keshan2.m]

j_vec=1:10;
mu_Q_vec=[0.01:0.01:16];
sigma_n=0.9786;
mu_R_j_mat=zeros(length(j_vec),length(mu_Q_vec));
for kk=1:length(mu_Q_vec)
    mu_Q=mu_Q_vec(kk);
mu_R_j=f_j_mu(j_vec,mu_Q,sigma_n);
mu_r_j_mat(:,kk)=mu_R_j';
end;
plot(mu_Q_vec,mu_r_j_mat)
grid on;
