# Supplementary material for: An Efficient Design of Systematic Rateless Codes
Source: Hindawi journal article supplement (doi:10.1155/2020/8068414), 2020-05-19
Supplement: f1 [file 8068414.f1.zip › supplementary files/Matlab_code_for_Figure1/BER_by_GA_mean/keshan3.m]

close all;
clc;
clear;
% output_node_index=[1:18 200];
% omiga(output_node_index)=[0.0036 0.0061 0.0106 0.0226 0.1337 0.6927 0.0024 0.0607 0.0097 0.0128 0.0049 0.0028 0.0013 0.0011 0.0009 0.0007 0.0005 0.0003 0.0326];
% output_node_index=[1:20 200];
% omiga(output_node_index)=[0.0044 0.0046 0.0055 0.0048 0.3327 0.4143 0.0875 0.0758 0.0059 0.005 0.0054 0.0059 0.0047 0.0034 0.0026 0.0012 0.001 0.0008 0.0006 0.0003 0.0332];
% output_node_index=[1:28 200];
% omiga(output_node_index)=[0.4885 0.011 0.0042 0.2703 0.0082 0.0302 0.0256 0.0205 0.0163 0.0131 0.0107 0.0089 0.0075 0.0064 0.0056 0.0049 0.0043 0.0038 0.0033  0.0029 0.0025 0.0022 0.0019 0.0015 0.0012 0.0009 0.0006 0.0003 0.0423];
% output_node_index=[1 4 12 200];
% omiga(output_node_index)=[1.110293642910536e-02 7.015405884099218e-01 2.582820972699931e-01 2.907437789097975e-02];
% output_node_index=[1:5 8 14 30 33 200];
% omiga(output_node_index)=[0.006 0.492 0.0339 0.2403 0.006 0.095 0.049 0.018 0.0356 0.033];
output_node_index=[1 4 12 200];
omiga(output_node_index)=[0.011150577089523 0.701472672339980 0.258302475239597 0.029074275330900];
% output_node_index=[1 2 3 4 5 8 9 19 65 66]
% omiga(output_node_index)=[0.007969 0.493570 0.166220 0.072646 0.082558 0.056058 0.037229 0.055590 0.025023 0.003135];
ch_index=output_node_index;
ch_degree=degree_node_to_edge(omiga);

sum(omiga)
sum(ch_degree)
beta=output_node_index*omiga(output_node_index)'
alpha=beta*1

epsilon_0=1;
sigma_n=sqrt(1);
L=200;
mu0=30;
y0=5e-4;
mu_k_vec=[0.01 mu0/L:mu0/L:mu0];
gamma_p=1/sigma_n^2;
g_gamma=exp(-1/2*gamma_p);

st_left_vec=zeros(length(mu_k_vec),1);
for kk=1:length(mu_k_vec)
    mu_k=mu_k_vec(kk);
    st_left_vec(kk)=epsilon_0*sum(output_node_index.*omiga(output_node_index).*f_j_mu(output_node_index,mu_k,sigma_n),2)+2/sigma_n^2; 
%    st_left_vec(kk)=alpha*ch_degree(ch_index)*fd_fun(sigma_n,ch_index,mu_k);
end
% st_left_vec(kk+1)=1/12*g_gamma*exp(beta*epsilon_0*(g_gamma-1));
 compare_vec=[st_left_vec mu_k_vec'];
plot(mu_k_vec, compare_vec);
figure;plot(mu_k_vec, st_left_vec-mu_k_vec')
Pe=qfunc(sqrt(mu_k_vec(end)/2))

% epsilon_vec=[0.05:0.05:2];
% Plb_star=1/12*g_gamma*exp(beta*epsilon_vec*(g_gamma-1));
% figure;semilogy(epsilon_vec,Plb_star,'--*');
% 
% alpha_vec=beta*epsilon_vec;
% input_node_index=1:50;
% aita_mat=zeros(length(alpha_vec),length(input_node_index));
% for aa=1:length(alpha_vec);
%     alpha=alpha_vec(aa);
%     aita_mat(aa,:)=exp(-alpha)*alpha.^input_node_index./gamma(input_node_index+1);
%     aita_mat(aa,1)=1-sum(aita_mat(aa,2:end));
%     Plb(aa)=aita_mat(aa,:)*qfunc(sqrt(input_node_index+1)/sigma_n)';
% end
% sum(aita_mat,2);
% hold on;semilogy(epsilon_vec,Plb,'--');


grid on;
