# Supplementary material for: An Efficient Design of Systematic Rateless Codes
Source: Hindawi journal article supplement (doi:10.1155/2020/8068414), 2020-05-19
Supplement: f1 [file 8068414.f1.zip › supplementary files/Matlab_code_for_Figure1/BER_by_GA_mean/keshan4.m]

close all;
clc;
clear;
out_node_index=[1:18 200];
omiga(out_node_index)=[0.0036 0.0061 0.0106 0.0226 0.1337 0.6927 0.0024 0.0607 0.0097 0.0128 0.0049 0.0028 0.0013 0.0011 0.0009 0.0007 0.0005 0.0003 0.0326];
out_node_degree=omiga;
sum(omiga)
beta=out_node_index*omiga(out_node_index)'


epsilon_0=1;
sigma_n=1;
alpha=beta*epsilon_0;
average_in_node_degree_num=alpha;
in_node_index=1:average_in_node_degree_num*3;                 % ÊäÈë½Úµã¶ÈÊý·¶Î§£¨ËäÈ»ÀíÂÛÉÏÊÇÕýÎÞÇî´ó£¬µ«ÐèÒª¸ù¾ÝÆ½¾ù¶ÈÊý½øÐÐ½Ø¶Ï£©
in_node_degree=exp(-average_in_node_degree_num)*average_in_node_degree_num.^in_node_index./gamma(in_node_index+1);   % ÊäÈë½ÚµãµÄ¶È·Ö²¼
% in_node_degree1=in_node_degree;
in_node_degree(1)=1-sum(in_node_degree(2:end));


ch_degree=degree_node_to_edge(out_node_degree);
ch_index=out_node_index;

mu_Q_vec=zeros(1,200);
for ii=2:200
    mu_Q_vec(ii)=alpha*ch_degree(out_node_index)*f_j_mu(out_node_index,mu_Q_vec(ii-1),sigma_n)'+2/sigma_n^2;
end
% mu_Q_end=mu_Q_vec(end);
mu_R=(mu_Q_vec(end)-2/sigma_n^2)/alpha;
mu_i=2/sigma_n^2+in_node_index*mu_R;
Pe=in_node_degree*qfunc(sqrt(mu_i/2))'
