# Supplementary material for: An Efficient Design of Systematic Rateless Codes
Source: Hindawi journal article supplement (doi:10.1155/2020/8068414), 2020-05-19
Supplement: f1 [file 8068414.f1.zip › supplementary files/Matlab_code_for_Figure1/BER_by_GA_mean/linear_prog_LT.m]

%%%%%%%% 20180412 ÏßÐÔ¹æ»®½âÓÅ»¯ÎÊÌâ  %%%%%%
clc;
dc=200;
sigma_n=1;
gamma=1/sigma_n^2;
g_gamma=exp(-1/2*gamma);
epsilon_0=1;
% beta=12.5065;alpha=beta*epsilon_0;
output_node_index=[1:200];
y0=5*1e-4
% mu_0=2*qfuncinv(y0)^2
mu_0=10;
L=500;
mu_k_vec=[0 mu_0/L:mu_0/L:mu_0];

c=output_node_index;
A=zeros(length(mu_k_vec),length(output_node_index));
b=zeros(length(mu_k_vec),1);
for kk=1:length(mu_k_vec)
    mu_k=mu_k_vec(kk);
    b(kk)=-mu_k+2/sigma_n^2;
    A(kk,:)=-epsilon_0*output_node_index.*f_j_mu(output_node_index,mu_k,sigma_n);
end
A=[A;output_node_index*epsilon_0*(g_gamma-1)];
b=[b;log(12*y0/g_gamma)];
Aeq=ones(1,length(output_node_index));
beq=1;
vlb=zeros(length(output_node_index),1);
vub=[ones(18,1);zeros(181,1);1];
[omiga,fval]=linprog(c,A,b,Aeq,beq,vlb,vub)

%%%%%%%%%%%%%%%%%%%%%%%%%%%%%%%%%%%%%%%%%%%%%%%%%%%
% sigma_n=1;
% capacity=C2_BPSK(1/sigma^2);
% D=200;
% alpha=22;
% d_vec=[1:D];
% mu_0=10;
% L=100;
% mu_k_vec=[0:mu_0/L:mu_0];
% 
% c=alpha*1./d_vec;
% A=zeros(length(mu_k_vec),length(d_vec));
% Ac=A;
% b=zeros(length(mu_k_vec),1);
% for kk=1:length(mu_k_vec)
%     mu_k=mu_k_vec(kk);
%     b(kk)=-mu_k-0.00001;
%     A(kk,:)=-alpha*fd_fun(sigma_n,d_vec,mu_k);
%     A_c(kk,:)=-alpha*f_j_mu(d_vec,mu_k,sigma_n);
% end
% Aeq=ones(1,length(d_vec));
% beq=1;
% vlb=[zeros(length(d_vec),1)];
% vub=[];
% % options=optimoptions('linprog','Algorithm','interior-point-legacy ','Display','iter');
% % [omiga,fval]=linprog(c,A,b,Aeq,beq,vlb,vub,options )
% [omiga,fval]=linprog(c,A,b,Aeq,beq,vlb,vub)
% code_rate=1/(alpha*sum(omiga'./d_vec))
% capacity=C2_BPSK(1/sigma^2)
