# Supplementary material for: An Efficient Design of Systematic Rateless Codes
Source: Hindawi journal article supplement (doi:10.1155/2020/8068414), 2020-05-19
Supplement: f1 [file 8068414.f1.zip › supplementary files/Matlab_code_for_Figure1/BER_by_GA_mean/Main_GA.m]

%%%%%% 20180406 ¸ßË¹½üËÆ  LTÂë£¬ AWGNÐÅµÀ %%%%%%
% »ùÓÚÎÄÏ×2016-Optimization Design and Asymptotic Analysis of Systematic Luby Transform Codes over BIAWGN Channels
% ±¾³ÌÐò¹¦ÄÜ£º¼ÆËã²»Í¬·ûºÅÐÅÔë±È»ò²»Í¬ÒëÂë¿ªÏúÏÂ¸ßË¹½üËÆËùµÃµ½µÄÎóÂëÂÊ(¹Ì¶¨·ûºÅÐÅÔë±È)£¬
% ÓÐ½¥½øÐÔÄÜ£¬ÏÂ½ç£¬ÏÂ½çµÄÈý¸ö½üËÆÖµÎåÖÖ¿ÉÄÜÇé¿ö¡£
% ÊµÑé½á¹ûËµÃ÷£ºÓÉÓÚPhiº¯ÊýºÍInv_Phiº¯ÊýÊÇÊýÖµÄ£Äâ£¬ËùÒÔÔÚ¾ùÖµ½Ï´óÊ±»á³öÏÖ¡°Í»ÆÆ¡±ÏÂ½çµÄÇé¿ö³öÏÖ¡£
% out_node_index:  LTÂëÊä³ö½ÚµãµÄ¶ÈÊýË÷Òý
% out_node_degree:  LTÂëÊä³ö½ÚµãµÄ¶È·Ö²¼
% beta: LTÂëÊä³ö½ÚµãÆ½¾ù¶ÈÊý
% out_edge_degree: LTÂëÊä³ö½ÚµãµÄ±ßµÄ¶È·Ö²¼
% alpha: LTÂëÊäÈë½ÚµãÆ½¾ù¶ÈÊý
% in_node_index: ÊäÈë½Úµã¶ÈÊýË÷Òý
% in_node_degree: ÊäÈë½ÚµãµÄ¶È·Ö²¼


% overhead_vec£º´ý¿¼²ìµÄ¿ªÏú·¶Î§
% sigma_n:  ÐÅµÀµÄÔëÉù±ê×¼²î
% SNR:  ·ûºÅÐÅÔë±È£¬SNR=1/sigma_n^2;

clear;
clc;
% close all;

% Âë×Ö²ÎÊýºÍÐÅµÀ±ê×¼²îÑ¡Ôñ
overhead_vec=[0.5:0.05:2];    
max_k=1000;  % ¸ßË¹½üËÆµÄ×î´óµü´ú´ÎÊý
% SNR_indB=10;
% SNR=10^(SNR_indB/10);
% SNR=10;   
% sigma_n=sqrt(1/SNR);
sigma_n=0.977;SNR=1/sigma_n^2;
% SNR=2;sigma_n=sqrt(1/SNR)

%%%%%%%%%%%%%%%%%% Ñ¡ÔñÊä³ö½ÚµãµÄ¶È·Ö²¼  %%%%%%
% K=1000;c=0.02;delta=0.1;
% [out_node_degree,average_out_node_degree_num]=gene_rsd_dist(K,c,delta);  % µÃµ½RSD·Ö²¼ºÍÆ½¾ù¶È·Ö²¼
% out_node_index=[1:K];       %RSD·Ö²¼µÄ¿ÉÄÜ¶ÈÊý´Ó1µ½K
% K=65536;
%  case 2016.977
       out_node_index=[1:20 200];   
       out_node_degree(out_node_index)=[0.0044 0.0046 0.0055 0.0048 0.3327 0.4143 0.0875 0.0758 0.0059 0.005 0.0054 0.0059 0.0047 0.0034 0.0026 0.0012 0.001 0.0008 0.0006 0.0003 0.0332];    
    
%  case 2019  % ²âÊÔ£¬rho=0.7; sigma_2=0.9786^2/rho;  sigma_n_2=0.05^2; alpha_star=10; design_OH= 1.797837808421577;     Pe_target=3e-3;  D=50
%         out_node_index=[ 5     6    30    31 ]; 
%         out_node_degree(out_node_index)=[0.143739573921700   0.728784661257046   0.124207861387834   0.003267903433419];
% out_node_index=[1 2 3 4 5 8 9 19 65 66]; 
% out_node_degree(out_node_index)=[0.007969 0.493570 0.166220 0.072646 0.082558 0.056058 0.037229 0.055590 0.025023 0.003135];
% out_node_index=[1:18 200];
% out_node_degree(out_node_index)=[0.0036 0.0061 0.0106 0.0226 0.1337 0.6927 0.0024 0.0607 0.0097 0.0128 0.0049 0.0028 0.0013 0.0011 0.0009 0.0007 0.0005 0.0003 0.0326];
%  
% out_node_index=[1 2 3 4 5 8 14 30 33 200];    %AWGNÐÅµÀÏÂµÄÓÅ»¯½á¹û  2006Äê
% out_node_degree(out_node_index)=[0.006 0.492 0.0339 0.2403 0.006 0.095 0.049 0.018 0.0356 0.033]; 

%        out_node_index=[1 2 3 4 10 11 22 23];  % AWGNÐÅµÀÏÂµÄÓÅ»¯½á¹û 2009Äê
%        out_node_degree(out_node_index)=[0.00428 0.49924 0.01242 0.34367 0.04604 0.06181 0.02163 0.01091];
if abs(1-sum(out_node_degree))>1e-2
    error('Êä³ö½Úµã¶È·Ö²¼Ö®ºÍÎª%2.5f£¬Çëµ÷Õû',sum(out_node_degree))
end
% out_node_index=[1:18 200];
% out_node_degree(out_node_index)=[0.0036 0.0061 0.0106 0.0226 0.1337 0.6927 0.0024 0.0607 0.0097 0.0128 0.0049 0.0028 0.0013 0.0011 0.0009 0.0007 0.0005 0.0003 0.0326];
% out_node_index=[1 4 12 200];
% out_node_degree(out_node_index)=[1.110293642910536e-02 7.015405884099218e-01 2.582820972699931e-01 2.907437789097975e-02];
% out_node_degree(out_node_index(1))=1-sum(out_node_degree(out_node_index(2:end)));
beta=out_node_index*out_node_degree(out_node_index)';
out_edge_degree=degree_node_to_edge(out_node_degree);
ch_degree=out_edge_degree;
ch_index=out_node_index;


for ii=1:length(overhead_vec)
    overhead=overhead_vec(ii);
alpha=beta*overhead;   % ÊäÈë£¨±äÁ¿£©½ÚµãÆ½¾ù¶ÈÊý£¬Ò²ÊÇ²´ËÉ²ÎÊý
in_node_index=1:round(alpha*4);                 % ÊäÈë½Úµã¶ÈÊý·¶Î§£¨ËäÈ»ÀíÂÛÉÏÊÇÕýÎÞÇî´ó£¬µ«ÐèÒª¸ù¾ÝÆ½¾ù¶ÈÊý½øÐÐ½Ø¶Ï£©
in_node_degree=exp(-alpha)*(alpha.^in_node_index)./gamma(in_node_index+1);   % ÊäÈë½ÚµãµÄ¶È·Ö²¼
in_node_degree(1)=in_node_degree(1)+exp(-alpha);    % °ÑÊäÈë½Úµã¶ÈÊýÎª0µÄ¸ÅÂÊ¼Óµ½¶ÈÊýÎª1µÄ¸ÅÂÊÉÏ£¨±ÜÃâÂë³¤½Ï¶ÌÊ±¶ÈÊýÎª0µÄ¸ÅÂÊ¹ý´ó£©
if abs(1-sum(in_node_degree))>1e-3
    error('ÊäÈë½Úµã¶È·Ö²¼Ö®ºÍÎª%2.5f\n,Çëµ÷Õû',sum(in_node_degree))
end
in_edge_degree=degree_node_to_edge(in_node_degree);
var_degree=in_edge_degree;
var_index=in_node_index;

s=2/sigma_n^2;   % ÐÅµÀÔëÉùÏîµÄ·½²î¡£
r=Phi(s);   % r0
% r=1;


k=0;
Pe=zeros(1,max_k);

while 1
    k=k+1;
    
    mu=ch_degree(ch_index)*inv_Phi(1-(1-Phi(s))*(1-r).^(ch_index-1))';
    mv_i_vector=s+(var_index-1)*mu;
%     mv_i_vector=(var_index-1)*mu;
    r=var_degree(var_index)*Phi(mv_i_vector)';

    Pe(k)=in_node_degree(in_node_index)*qfunc(sqrt((s+in_node_index*mu)/2))';
%     Pe(k)=qfunc(sqrt((s+alpha*mu)/2));

    if k>=max_k
        break;
    end
end  %while 1

Plb=in_node_degree(in_node_index)*qfunc(sqrt(in_node_index+1)/sigma_n)';  % ÎóÂëÂÊÏÂ½ç¾«È·Öµ
g_gamma=exp(-1/2*SNR);
epsilon=overhead;
Plb_star=1/12*g_gamma*exp(-beta*epsilon)*(exp(beta*epsilon*g_gamma)-1);   % ÎóÂëÂÊÏÂ½ç½üËÆÖµ
Plb_LSNR=1/12*g_gamma*exp(beta*epsilon*(g_gamma-1));                        % ÎóÂëÂÊÏÂ½çÔÚµÍÐÅÔë±ÈÏÂµÄ½üËÆÖµ
Plb_HSNR=1/12*beta*epsilon*exp(-(beta*epsilon+SNR));                   % ÎóÂëÂÊÏÂ½çÔÚ¸ßÐÅÔë±ÈÏÂµÄ½üËÆÖµ


P_asy(ii)=Pe(end);             % ¼ÇÂ¼¸ßË¹½üËÆ½¥½øÐÔÄÜÏÂÎóÂëÂÊ
Plb_vec(ii)=Plb;               % ÎóÂëÂÊÏÂ½ç¾«È·Öµ
Plb_star_vec(ii)=Plb_star;     % ÎóÂëÂÊÏÂ½ç½üËÆÖµ
Plb_LSNR_vec(ii)=Plb_LSNR;
Plb_HSNR_vec(ii)=Plb_HSNR;
end  % for ii
semilogy(overhead_vec,[P_asy;Plb_vec;Plb_star_vec;Plb_HSNR_vec]);grid on;


% SNR_indB=[-10:0.5:10];
% SNR=10.^(SNR_indB/10);
% sigma_0=sqrt(1./SNR);
% for ii=1:length(sigma_0)
% Plb(ii)=in_node_degree(in_node_index)*qfunc(sqrt(in_node_index+1)/sigma_0(ii))'
% end;
% figure;semilogy(SNR_indB,Plb);grid on;
%%%%%%%%%%%%%%%%%%%%%%%%%%%%%%%%%%%%%%%%%%%%%%%%
% SNR_indB=[2];
% SNR=10.^(SNR_indB/10);
% SNR=2;
% sigma_0=sqrt(1./SNR);
% 
% overhead_vec=[1:0.1:4];
% for ii=1:length(overhead_vec)
% overhead=overhead_vec(ii);
% average_in_node_degree_num=average_out_node_degree_num*overhead;   % ÊäÈë£¨±äÁ¿£©½ÚµãÆ½¾ù¶ÈÊý£¬Ò²ÊÇ²´ËÉ²ÎÊý
% in_node_index=1:average_in_node_degree_num*3;                 % ÊäÈë½Úµã¶ÈÊý·¶Î§£¨ËäÈ»ÀíÂÛÉÏÊÇÕýÎÞÇî´ó£¬µ«ÐèÒª¸ù¾ÝÆ½¾ù¶ÈÊý½øÐÐ½Ø¶Ï£©
% in_node_degree=exp(-average_in_node_degree_num)*average_in_node_degree_num.^in_node_index./gamma(in_node_index+1);   % ÊäÈë½ÚµãµÄ¶È·Ö²¼
% 
% var_degree=degree_node_to_edge(in_node_degree);
% var_index=in_node_index;
% Plb(ii)=in_node_degree(in_node_index)*qfunc(sqrt(in_node_index+1)/sigma_0)';
% end
% figure;semilogy(overhead_vec,Plb);grid on;
