# Supplementary material for: An Efficient Design of Systematic Rateless Codes
Source: Hindawi journal article supplement (doi:10.1155/2020/8068414), 2020-05-19
Supplement: f1 [file 8068414.f1.zip › supplementary files/Matlab_code_for_Figure1/BER_by_GA_mean/Main_GA_AWGN_with_erasures.m]

%%%%%% 20170405 ¸ßË¹½üËÆ    ÐÞ¸ÄËã·¨£¬ AWGN/BEC»ìºÏÐÅµÀ %%%%%%
clear;
clc;
EbN0indB=2.4758;
e0=0.2;  % É¾³ý¸ÅÂÊ


isirregular=1;
if isirregular==0
   dl=4;dr=6;                                                                      % ¹æÔòÂë×ÖµÄ¶È·Ö²¼
   var_index=dl;
   var_degree(var_index)=1;
   ch_index=dr;
   ch_degree(ch_index)=1;    
   code_rate=1-sum(ch_degree(ch_index)./ch_index)/sum(var_degree(var_index)./var_index);
else
    code_rate=1/2;
%     var_index=[2 3 6 7 20];
%     var_degree(var_index)=[0.23403 0.21242 0.14690 0.10284 0.30381];
% %     [ch_index,ch_degree]=gen_check_dist(var_index,var_degree,code_rate)
%     ch_index=[8 9];
%     ch_degree(ch_index)=[0.71875 0.28125];
%     dl=var_index(end);
%     dr=ch_index(end);
    dl=6;
    var_index=[2 3 6];
    var_degree(var_index)=[0.3311 0.3307 0.3372];
    ch_index=[6 7];
    ch_degree(ch_index)=[0.982 0.018];
    dr=ch_index(end);
end;


max_k=1000;  % ×î´óµü´ú´ÎÊý
pe_target=1e-8;  %Ä¿±êÎóÂëÂÊ


EbN0=10^(EbN0indB/10);
Es=1;
Eb=Es/code_rate;
N0=Eb/EbN0;
sigma_n=sqrt(N0*Es/2)     % ÔëÉù±ê×¼²î

% sigma_n=0.5;  % ÔëÉù·½²î
mu0=2/sigma_n^2;
% s=mu0;
% r=Phi(s);   % r0
mu=0;
e=e0;
r_index=1./(1-e).^(ch_index-1).*(1-e0-(1-e0)*Phi(mu0)).^(ch_index-1);
% Pe0=0.5*erfc(sqrt(mu0)/2);

k=0;
Pe=zeros(1,max_k);
while 1
    k=k+1;
    
    epsilon=1-ch_degree(ch_index)*((1-e).^(ch_index-1))';
    mu=ch_degree(ch_index)*(inv_Phi(1-r_index))';
     
    e=e0*var_degree(var_index)*(epsilon.^(var_index-1))';
    temp=0;
    for ii=var_index
        for s=0:ii-1
            temp=temp+var_degree(ii)*nchoosek(ii-1,s)*(1-epsilon)^s*epsilon^(ii-1-s)*(e0*Phi(s*mu)+(1-e0)*Phi(s*mu+mu0));
        end;
    end;
    r_index=1./(1-e).^(ch_index-1).*(1-temp).^(ch_index-1);
    
    
%     mu=ch_degree(ch_index)*inv_Phi(1-(1-r).^(ch_index-1))';
%     mv_i_vector=s+(var_index-1)*mu;
%     r=var_degree(var_index)*Phi(mv_i_vector)';
    
    var_degree_nodes(var_index)=(var_degree(var_index)./var_index)/sum(var_degree(var_index)./var_index);
    for ii=var_index
        for s=0:ii
            Pe(k)=Pe(k)+var_degree_nodes(ii)*nchoosek(ii,s)*(1-epsilon)^s*epsilon^(ii-s)*(e0*erfc(sqrt(s*mu/2))+(1-e0)*erfc(sqrt((s*mu+mu0)/2)));
        end;
    end;
    
    
    if Pe(k)<pe_target
        break;
    end;
    if k>=max_k
        break;
    end;
end;
semilogy(Pe)
