# Supplementary material for: An Efficient Design of Systematic Rateless Codes
Source: Hindawi journal article supplement (doi:10.1155/2020/8068414), 2020-05-19
Supplement: f1 [file 8068414.f1.zip › supplementary files/Matlab_code_for_Figure1/BER_by_GA_mean/simu_Fig5_Fig6.m]

%%%%%% 20180417 ±¾ÎÄ·ÂÕæÍ¼5ºÍÍ¼6ÏÂ½çµÄÇúÏß  %%%%%%%%%
% SNR_indB_vec=[-10:1:10]
% gamma_vec=10.^(SNR_indB_vec/10);
% gamma_vec=10;
sigma_n=1;gamma_vec=1/sigma_n^2;
g_gamma_vec=exp(-1/2*gamma_vec);
beta=12.3588;
epsilon_vec=[0:0.1:2]
Plb_star=1/12*g_gamma_vec*exp(-beta*epsilon_vec).*(exp(beta*epsilon_vec*g_gamma_vec)-1);
Plb_star_LSNR=1/12*g_gamma_vec.*exp(beta*epsilon_vec*(g_gamma_vec-1));
Plb_star_HSNR=1/12*beta*epsilon_vec.*exp(-(beta*epsilon_vec+gamma_vec));
if length(gamma_vec)>1
    semilogy(SNR_indB_vec,Plb_star,'kd-')
    hold on;semilogy(SNR_indB_vec,Plb_star_LSNR,'k+-')
    hold on;semilogy(SNR_indB_vec,Plb_star_HSNR,'ks-')
else
    semilogy(epsilon_vec,Plb_star,'kd-')
%     hold on;semilogy(epsilon_vec,Plb_star_LSNR,'k+-')
%     hold on;semilogy(epsilon_vec,Plb_star_HSNR,'ks-')
end

grid on;
