# Supplementary material for: An Efficient Design of Systematic Rateless Codes
Source: Hindawi journal article supplement (doi:10.1155/2020/8068414), 2020-05-19
Supplement: f1 [file 8068414.f1.zip › supplementary files/Matlab_code_for_Figure1/BER_by_Simulation/Gpois.m]

% 20170831  poisson ¶È·Ö²¼µÄLT±àÂë
function G=Gpois(K,N)
% clear;clc;
% K=10000;N=15000;Num_Try=5;
if nargin<3
    Num_Try=10;    %  Ëæ»úÉú³ÉNum_Try¸ö¾ØÕó£¬´ÓÖÐÑ¡ÔñÒ»¸ö
end;
G_Try={};
Mean_SR=zeros(1,Num_Try);
Min_SR=zeros(1,Num_Try);
SR_vec=zeros(1,Num_Try);
for Ind_Try=1:Num_Try
    while(1)
        %create pdf
%         c=0.1;        % ¶È·Ö²¼¾ùÖµ£¬ÌØ¶¨²ÎÊý
%         delta=0.5;    % ÔÊÐíÒëÂëÊ§°ÜµÄ¸ÅÂÊ¼«Öµ
%         R_SD=c*log(K/delta)*sqrt(K);
%         rho=zeros(1,K);
%         thu=zeros(1,K);
%         d=1:K;
%         rho(1)=1/K;
%         rho(2:K)=1./(d(2:end).*(d(2:end)-1));
%         loc=floor(K/R_SD-1);
%         thu(1:loc)=R_SD/K./d(1:loc);
%         thu(loc+1)=R_SD/K*log(R_SD/delta);
%         Z=sum(rho+thu);
%         mu=(rho+thu)/Z;
        degree=[1 2 3 4 5 8 9 19 65 66];
        mu=zeros(1,length(degree));
        mu(1)=0.007969;mu(2)=0.493570;mu(3)=0.166220;mu(4)=0.072646;mu(5)=0.082558;
        mu(6)=0.056058;mu(7)=0.037229;mu(8)=0.055590;mu(9)=0.025023;mu(10)=1-sum(mu);
        Number_vec=randsrc(1,N,[degree;mu]);
        for n=1:N
            Num=Number_vec(n);
            row=randperm(K);
            G(row(1:Num),n)=1;   
        end;

        SR=sum(G,2);
%         if min(SR)>0
            Mean_SR(Ind_Try)=mean(SR);
            Min_SR(Ind_Try)=min(SR);
            G_Try{Ind_Try}=sparse(G);
            break;
%         end;
    end;
    SR_vec(Ind_Try)=length(find(SR==0));  % ¼ÇÂ¼Ã¿¸ö¾ØÕóÖÐ¶ÈÊýÎª0µÄÊäÈë½ÚµãµÄ¸öÊý
    Ind_Try
    SR_vec(Ind_Try)
    if SR_vec(Ind_Try)==0
        break;
    end;
end;
[num,loc]=min(SR_vec); 
if num==0
    G=G_Try{loc};
    fprintf('Ö±½ÓµÃµ½¿ÉÒëÉú³É¾ØÕó!\n')
else
    G=G_Try{loc};
    SR=sum(G,2);
    loc=find(SR==0);
    for ii=1:length(loc)
        RN=randperm(N);
        G(loc(ii),RN(1))=1;
    end;
    fprintf('Ô­Éú³É¾ØÕóº¬¶ÈÊýÎª0µÄÊäÈë½Úµã¸öÊý=%d,ÒÑ½øÐÐÐÞ²¹!\n',length(loc));
end;

% [V,loc]=max(Mean_SR);
% G=G_Try{loc};
% G=full(G);
