# Supplementary material for: An Efficient Design of Systematic Rateless Codes
Source: Hindawi journal article supplement (doi:10.1155/2020/8068414), 2020-05-19
Supplement: f1 [file 8068414.f1.zip › supplementary files/Matlab_code_for_Figure1/BER_by_Simulation/Grsd.m]

%%%%% 20170807 LTÂëÉú³Éº¯Êý  <K.D.Rao> %%%% 
function G=Grsd(K,N)
if nargin<3  
    ColTH=1.3;    % bound for number of 1's in each column % Ã¿Ò»ÁÐµ±ÖÐ1µÄ¸öÊýµÄÉÏÏÞ£¨ÊÇK/R_SDµÄColTH±¶£©
end;
if nargin<4
    Num_Try=10;    %  Ëæ»úÉú³ÉNum_Try¸ö¾ØÕó£¬´ÓÖÐÑ¡ÔñÒ»¸ö
end;
G_Try={};
Mean_SR=zeros(1,Num_Try);
Min_SR=zeros(1,Num_Try);
for Ind_Try=1:Num_Try
    while(1)
        %create pdf
        c=0.1;        % ¶È·Ö²¼¾ùÖµ£¬ÌØ¶¨²ÎÊý
        delta=0.5;    % ÔÊÐíÒëÂëÊ§°ÜµÄ¸ÅÂÊ¼«Öµ
        R_SD=c*log(K/delta)*sqrt(K);
        rho=zeros(1,K);
        thu=zeros(1,K);
        d=1:K;
        rho(1)=1/K;
        rho(2:K)=1./(d(2:end).*(d(2:end)-1));
        loc=floor(K/R_SD-1);
        thu(1:loc)=R_SD/K./d(1:loc);
        thu(loc+1)=R_SD/K*log(R_SD/delta);
        Z=sum(rho+thu);
        mu=(rho+thu)/Z;
        % threshold for maximum number of ones per column
        MaxColTH=K/R_SD*ColTH;
        G=zeros(K,N);
        for n=1:N
            while(1)
                %draw a number  % ·´º¯Êý·¨£ºÓÃ·Ö²¼º¯ÊýÈ·¶¨Î±Ëæ»úÊý
                Cmu=cumsum(mu)/sum(mu);
                u=rand(1,1);
                diff=abs(u-Cmu);
                [M,loc]=min(diff);
                Num=d(loc);
                if Num<=MaxColTH
                    break;
                end;
            end;
            row=randperm(K);
            G(row(1:Num),n)=1;
        end;
        SR=sum(G,2);
        if min(SR)>0
            Mean_SR(Ind_Try)=mean(SR);
            Min_SR(Ind_Try)=min(SR);
            G_Try{Ind_Try}=sparse(G);
            break;
        end;
    end;
end;
% maximize weight per row and minimize weight per col
[V,loc]=max(Mean_SR);
G=G_Try{loc};
G=full(G);
