# Supplementary material for: An Efficient Design of Systematic Rateless Codes
Source: Hindawi journal article supplement (doi:10.1155/2020/8068414), 2020-05-19
Supplement: f1 [file 8068414.f1.zip › supplementary files/Matlab_code_for_Figure1/BER_by_Simulation/Linear_time_PEG.m]

%%%%%%%%%ÏßÐÔPEGËã·¨Éú³ÉÐ£Ñé¾ØÕó
% clear;
% clc;
% tic;
function H=Linear_time_PEG(K,N,dv)
% K=4560-1900;    
% N=4560;
H=sparse(K,N);  % ´ýÉú³ÉµÄÐ£Ñé¾ØÕó(ÓÃÏ¡Êè¾ØÕóÊµÏÖ£¬±ÜÃâ³¬³öÄÚ´æ·¶Î§)
H(1,1)=1;H(2,2)=1;H(3,3)=1; 
dv(1:(N-K))=min(dv(1:(N-K)),[1:(N-K)]); % ÉÏÈý½Ç²¿·ÖµÄ±äÁ¿½ÚµãµÄ¶È²»ÄÜ³¬¹ýµ±Ç°±äÁ¿ËùÔÚÎ»ÖÃ¶ÔÓ¦µÄÊý

for j=3:N-1
    for k=0:dv(j+1)-1
        if k==0
           if (j+1)>K     % ºóÃæN-KÁÐÓëÔ­À´pegËã·¨ÊÇÒ»ÑùµÄ
              checknode_degree=sum(H,2); %¼ÆËãµ±Ç°Ð£Ñé½ÚµãµÄ¶ÈÊý
              mindegree_index=find(checknode_degree==min(checknode_degree));  %ÕÒµ½µ±Ç°¶ÈÊý×îÐ¡µÄÐ£Ñé½Úµã¶ÔÓ¦µÄÎ»ÖÃ
              temp=randperm(length(mindegree_index));                       %ÔÚÕâÐ©Î»ÖÃÖÐËæ»úÕÒÒ»¸öÐ£Ñé½ÚµãÓëµ±Ç°±äÁ¿½ÚµãÏàÁ¬
              H(mindegree_index(temp(1)),j+1)=1;  
           else               % ÉÏÈý½Ç²¿·Ö
              H(j+1,j+1)=1; 
           end;
        else
           %%%%³õÊ¼»¯µ±Ç°Ê÷ÖÐ±éÀúµÄ±äÁ¿½ÚµãÓëÐ£Ñé½Úµã%%%%%%           
           if (j+1)>K  % ºóÃæN-KÁÐÓëÔ­À´pegËã·¨ÊÇÒ»ÑùµÄ
           %%%%%%%%%%%%%%%%%%%%%%%%%%%%%%%%%%%%%%%%
           Nv=zeros(1,N);
           Nv(j+1)=1;    
           Nc=zeros(K,1);
           flag=0;
           l=0;   %²ãÊý
              while (flag==0)
               if l==0;   % µÚ0²ã 
                 Nv(j+1)=1;
                 Nc(find(H(:,j+1)))=1;
                 Nc_lastdepth=Nc;% ¼ÇÂ¼µ±Ç°Éî¶ÈÖÐ°üº¬µÄÐ£Ñé½Úµã
                 l=l+1;
               else
                 temp_index=find(sum(H(find(Nc),:),1)); 
                 Nv(temp_index)=1;
                 
                 temp_index=find(sum(H(:,find(Nv)),2));
                 Nc(temp_index)=1;
                 
                 if (sum(Nc,1)<K) && (sum(Nc-Nc_lastdepth)==0)       %µÚÒ»ÖÖÇé¿ö£¬²»ÔÙÓÐÐÂµÄÐ£Ñé½Úµã³öÏÖ£¬¶øÇÒµ±Ç°Ð£Ñé½Úµã¸öÊýÐ¡ÓÚK
                    temp_index=find(Nc==0);
                    checknode_degree=sum(H(temp_index,:),2);
                    mindegree_index=find(checknode_degree==min(checknode_degree));
                    temp=randperm(length(mindegree_index));
                    H(temp_index(mindegree_index(temp(1))),j+1)=1;   %½«²»Óëµ±Ç°±äÁ¿½ÚµãÏàÍ¨µÄÐ£Ñé½ÚµãÖÐËæ»úÈ¡Ò»¸ö¶È×îÐ¡µÄ£¬²¢Óëµ±Ç°±äÁ¿½ÚµãÏàÁ¬
                    break;
                 elseif sum(Nc,1)==K                                 %µÚ¶þÖÖÇé¿ö£¬Ð£Ñé½ÚµãÊýÒÑ¾­µ½´ïK
                    temp_index=find(Nc_lastdepth==0);
                    checknode_degree=sum(H(temp_index,:),2);
                    mindegree_index=find(checknode_degree==min(checknode_degree));
                    temp=randperm(length(mindegree_index));
                    H(temp_index(mindegree_index(temp(1))),j+1)=1;   %½«µ±Ç°±äÁ¿½ÚµãÓë¶þÏîÍ¼ÉÏ¡°ÓëÆäÏàÁ¬ÐèÒª×î´ó¾àÀëµÄ¡±Ò»¸öÐ£Ñé½ÚµãÏàÁ¬
                    break;
                 end;
                 
                 Nc_lastdepth=Nc;% ¼ÇÂ¼µ±Ç°Éî¶ÈÖÐ°üº¬µÄÐ£Ñé½Úµã¸öÊý
                 
                 l=l+1;
               end;
              end;   % while (flag==0)
           else                       % ÉÏÈý½Ç²¿·Ö                            
               Nv=zeros(1,N);
               Nv(j+1)=1;    
               Nc=zeros(K,1);    
               flag=0;
               l=0;   %²ãÊý
               while (flag==0)
               if l==0;   % µÚ0²ã 
                 Nv(j+1)=1;
                 Nc(find(H(:,j+1)))=1;
                 Nc_lastdepth=Nc;% ¼ÇÂ¼µ±Ç°Éî¶ÈÖÐ°üº¬µÄÐ£Ñé½Úµã
%                  new_Nc_lastdepth=Nc_lastdepth(1:j+1);
                 l=l+1;
               else
                 temp_index=find(sum(H(find(Nc),:),1)); 
                 Nv(temp_index)=1;
                 
                 temp_index=find(sum(H(:,find(Nv)),2));
                 Nc(temp_index)=1;
                 
%                  new_Nc=Nc(1:j);
                 
                 if (sum(Nc,1)<j+1) && (sum(Nc-Nc_lastdepth)==0)       %µÚÒ»ÖÖÇé¿ö£¬²»ÔÙÓÐÐÂµÄÐ£Ñé½Úµã³öÏÖ£¬¶øÇÒµ±Ç°Ð£Ñé½Úµã¸öÊýÐ¡ÓÚK
                    temp_index=find(Nc(1:j)==0);
                    checknode_degree=sum(H(temp_index,:),2);
                    mindegree_index=find(checknode_degree==min(checknode_degree));
                    temp=randperm(length(mindegree_index));
                    H(temp_index(mindegree_index(temp(1))),j+1)=1;   %½«²»Óëµ±Ç°±äÁ¿½ÚµãÏàÍ¨µÄÐ£Ñé½ÚµãÖÐËæ»úÈ¡Ò»¸ö¶È×îÐ¡µÄ£¬²¢Óëµ±Ç°±äÁ¿½ÚµãÏàÁ¬
                    break;
                 elseif sum(Nc,1)==j+1                                 %µÚ¶þÖÖÇé¿ö£¬Ð£Ñé½ÚµãÊýÒÑ¾­µ½´ïK
                    temp_index=find(Nc_lastdepth(1:j)==0);
                    checknode_degree=sum(H(temp_index,:),2);
                    mindegree_index=find(checknode_degree==min(checknode_degree));
                    temp=randperm(length(mindegree_index));
                    H(temp_index(mindegree_index(temp(1))),j+1)=1;   %½«µ±Ç°±äÁ¿½ÚµãÓë¶þÏîÍ¼ÉÏ¡°ÓëÆäÏàÁ¬ÐèÒª×î´ó¾àÀëµÄ¡±Ò»¸öÐ£Ñé½ÚµãÏàÁ¬
                    break;
                 end;
                 
                 Nc_lastdepth=Nc;% ¼ÇÂ¼µ±Ç°Éî¶ÈÖÐ°üº¬µÄÐ£Ñé½Úµã¸öÊý
%                  new_Nc_lastdepth=Nc_lastdepth(1:j);
                 
                 l=l+1;
               end;
              end;   % while (flag==0)
               
           end; 
        end;  % if k==0
    end;  % for k=0:dv(j)-1

    if mod(j,100)==0
        j;
    end;
end;  %  for j=0:N-1
