# Supplementary material for: An Efficient Design of Systematic Rateless Codes
Source: Hindawi journal article supplement (doi:10.1155/2020/8068414), 2020-05-19
Supplement: f1 [file 8068414.f1.zip › supplementary files/Matlab_code_for_Figure1/BER_by_Simulation/Linear_time_PEG_get_word.m]

%%%%ÏßÐÔPEGËã·¨ºó»ñµÃ±àÂë±ÈÌØ
% clear;
% clc;
% load testH
function w=Linear_time_PEG_get_word(H,d)
[K,N]=size(H);
% d=randperm(K)>(K/2);
m=K;
p=zeros(1,m);
Hp=H(:,1:m);
Hd=H(:,m+1:N);

p(m)=mod(sum(Hd(m,1:N-m).*d(1:N-m)),2);
for i=[(m-1):-1:1]
    p(i)=mod(sum(Hp(i,i+1:m).*p(i+1:m))+sum(Hd(i,1:N-m).*d(1:N-m)),2);
end;
w=[p d];
