# Supplementary material for: An Efficient Design of Systematic Rateless Codes
Source: Hindawi journal article supplement (doi:10.1155/2020/8068414), 2020-05-19
Supplement: f1 [file 8068414.f1.zip › supplementary files/Matlab_code_for_Figure1/BER_by_Simulation/Linear_time_regular_Possion.m]

function H=Linear_time_regular_Possion(K,N,dv)
H=sparse(K,N);
H(1,1)=1;
H(2,2)=1;
H(2,3)=1;
H(3,3)=1;
H(3,4)=1;
H(4,4)=1;
H(4,5)=1;
H(5,5)=1;

for i=6:K
    temp=randperm(i-1);
    H(temp(1:dv-1),i)=1;
    H(i,i)=1;
end;
for i=K+1:N
    temp=randperm(K);
    H(temp(1:dv),i)=1;
end;
