# Supplementary material for: An Efficient Design of Systematic Rateless Codes
Source: Hindawi journal article supplement (doi:10.1155/2020/8068414), 2020-05-19
Supplement: f1 [file 8068414.f1.zip › supplementary files/Matlab_code_for_Figure1/BER_by_Simulation/LT_soft_decode.m]

%%%%%%%%% LTÂëÈíÅÐ¾öBPËã·¨ %%%%%%%%%%%
function [c1, Aql] = LT_soft_decode(L_rate,G,max_iter)
%%initialization
[K,N] = size(G);
% if K>N, G=G'; [K,N] = size(H); end
G=G';
[N,K]=size(G);
if ~issparse(G) % make G sparse if it is not sparse yet
   [ii,jj,sG] = find(G);
   G = sparse(ii,jj,sG,N,K);
end


% temptanhs=sparse(m,l);

[ii,jj] = find(G);            
indx = sub2ind([N K],ii,jj);
%iterations
k=0;
success = 0;
% max_iter = 20;
% Apl=log(f1./f0);
Apl=L_rate;
tanh_L_ch_d2=tanh(L_rate/2);
A_var=sparse(N,K);     % ¶ÔÓÚ³õÊ¼×´Ì¬£¬±äÁ¿½ÚµãµÄÏÈÑéÏûÏ¢Ó¦¸ÃÎª0£¬µ«ÊÇÎªÁË±ÜÃâ³öÏÖ³ýÒÔ0µÄÇé¿ö£¬½«ÆäÉèÎªÒ»¸öºÜÐ¡µÄÖµ
% A_var=spdiags(Apl(:),0,N,N) * G;
% Aq=AA;
while ((success == 0) && (k < max_iter)),
   k = k+1;
   %%%%% ±äÁ¿£¨ÏûÏ¢£©½ÚµãÏûÏ¢´¦Àí    %%%%%%%
   A_var_sum_vec=sum(A_var,1);   
   E_var=G * spdiags(A_var_sum_vec(:),0,K,K)-A_var;
   %%%%% Ð£Ñé£¨±àÂë£©½ÚµãÏûÏ¢´¦Àí    %%%%%%%
   A_chk=E_var/2+1e-10*G; % ¼ÓÒ»¸öºÜÐ¡µÄÊý£¬±ÜÃâ³öÏÖÏÈÑéÏûÏ¢Îª0µÄÇé¿ö
   ptanhs=spfun('tanh',A_chk);
%    ptanhs(indx(ptanhs(indx)==0))=eps;
%    ptanhs=spfun('tanh',Aqd2);
   hpv= full(real(exp(sum(spfun('log',ptanhs),2))));
   hpv_ch=hpv.*tanh_L_ch_d2';
   hp=spdiags(hpv_ch(:),0,N,N)*G;
   tem1=hp(indx)./ptanhs(indx);
   tem1(tem1<=-1)=eps-1;
   tem1(tem1>=1)=-eps+1;
   tem2=2*atanh(tem1);
   A_var=sparse(ii,jj,tem2,N,K);
    
%    BB=sum(Ar,1);
%    Aql=Apl+BB;
%    c1=(sign(Aql)+1);
%    c1=round(c1/2);
%    if sum(rem(H*(c1'),2)) == 0, success = 1; end   
%    Aq=AA+H*spdiags(BB(:),0,l,l)-Ar;
%    Aql1=Apl+sum(H*spdiags(BB(:),0,l,l)-Ar,1);
end
Aql=A_var_sum_vec;
c1=(1-sign(Aql));
c1=round(c1/2);
