# Supplementary material for: An Efficient Design of Systematic Rateless Codes
Source: Hindawi journal article supplement (doi:10.1155/2020/8068414), 2020-05-19
Supplement: f1 [file 8068414.f1.zip › supplementary files/Matlab_code_for_Figure1/BER_by_Simulation/Main_Raptor_enc_dec.m]

%%%%%%%% 20190619  RaptorÂë±àÒëÂëÖ÷³ÌÐò  PBIÐÅµÀ %%%%%%%%%%%%%%%
% Ö§³Ö¶àÖÖÐÅµÀ
% Ö§³ÖÏµÍ³ÂëºÍ·ÇÏµÍ³Âë
% ¹Ì¶¨¿ªÏú£¬¸Ä±ä±ÈÌØÐÅÔë±È£»¹Ì¶¨·ûºÅÐÅÔë±È£¬¸Ä±ä¿ªÏú
clear;clc;
format long
diary off  
rec_file='AWGN_dist2019298_K10000_S_part3.txt';    % ¼ÇÂ¼¹ý³ÌºÍ½á¹ûÎÄ¼þ
if  exist(rec_file,'file')
    delete(rec_file);
end
diary(rec_file); 
fprintf('20190612²âÊÔËõÐ¡ÄÚÂëÊä³öLLRÐ§¹û£¬ÇÒËõ¼õÒò×ÓÎª\n');
zoom_in=1 % Ëõ¼õÒò×Ó

tic;
channel_mode=1;  %ÐÅµÀÄ£Ê½ 1£ºPBIÐÅµÀ£¬2£ºRicianÐÅµÀ£¬3£ºRayleighÐÅµÀ£¬4£ºNakagamiÐÅµÀ
rho=0         %¸ÉÈÅÒò×Ó
sigma_n_2=0.977^2  % EsN0=1/(2*sigma_n_2)£¬ÊÇÒ»¸ö¹Ì¶¨Öµ   ÐÅÔë±È£¬¹Ì¶¨Öµ
sigma_n=sqrt(sigma_n_2);

Gamma=2; % RicianÐÅµÀ²ÎÊý
naka_m=2;  % NakagamiÐÅµÀ²ÎÊý
code_mode=1;      % 0: ·ÇÏµÍ³Âë£»   1£º ÏµÍ³Âë£»
fixed_OH=0;       % 0£º¹Ì¶¨ÐÅÔë±È£¨±äÒëÂë¿ªÏú£©£»  1£º¹Ì¶¨ÒëÂë¿ªÏú£¨±äÐÅÔë±È£©£»
if fixed_OH==1             % ¹Ì¶¨¿ªÏú£¬·ûºÅÐÅºÅ±È¿É±ä(±ÈÌØÐÅÔë±ÈºÍ·ûºÅÐÅÔë±ÈÒ»Ò»¶ÔÓ¦£¬ÒòÎª¿ªÏú¹Ì¶¨ÒâÎ¶×ÅÂëÂÊ¹Ì¶¨)
   EsN0indB_vec=[-5:0.5:3]
   EsN0_vec=10.^(EsN0indB_vec/10);sigma_vec=sqrt(1./EsN0_vec);sigma_vec2=sigma_vec.^2;
   Length_var=length(EsN0indB_vec);
   overhead_vec=[2]
   overhead=overhead_vec;
else                       % ¹Ì¶¨ÐÅÔë±È£¬¿ªÏú¿É±ä
   sigma_vec=sqrt(0.9786^2/rho)
   sigma=sigma_vec;
   if rho==0
       sigma=100;
   end
   overhead_vec=[1.15]
   Length_var=length(overhead_vec);
end
dist_num=2019.298               % Ñ¡ÔñLTÂëµÄ·Ö²¼    2:awgnÏÂÓÅ»¯µÄ1/2ÂëÂÊ£¬3£ºawgnÏÂÓÅ»¯µÄ1/3ÂëÂÊ£¬ 4£ºricianÏÂÓÅ»¯µÄ1/2ÂëÂÊ£¬5£ºricianÏÂÓÅ»¯µÄ1/3ÂëÂÊ£¬6£ºrayleighÏÂÓÅ»¯µÄ1/2ÂëÂÊ£¬7£ºrayleighÏÂÓÅ»¯µÄ1/3ÂëÂÊ        
%%%%%%%%%%%%%%%%%%%%%%%%%%%%%%%%%%%%%%%%%%%%%%%%%%%%%%%%%%%%%%%%%%%%%%%%%%%%%%%%%%%%%%%%%%%%%%%%%%%%%%%
    switch channel_mode
        case 1
            fprintf('µ±Ç°ÐÅµÀÎªPBIÐÅµÀ');
        
        case 2
            fprintf('µ±Ç°ÐÅµÀÎªRicianÐÅµÀ\n');
        case 3
            Gamma=0;
            fprintf('µ±Ç°ÐÅµÀÎªRayleighÐÅµÀ\n');
        case 4
            fprintf('µ±Ç°ÐÅµÀÎªNakagamiÐÅµÀ£¬m=%d\n',naka_m);   
        otherwise 
            error('ÇëÑ¡ÔñºÏÊÊÐÅµÀÀàÐÍ\n');
     end


%%%%%%%%%%%%%%%%%%%%%%%%%%%%%%%%%% Ô¤±àÂë²ÎÊýÉèÖÃ  %%%%%%%%%%%%%%%%%%%%%%%%%%
K=10000  % Ô­Ê¼ÐÅÏ¢³¤¶È
frame_num=2000;      % ·ÂÕæRaptorÖ¡Êý
show_time=50;       % Ã¿¸ôshow_timeÖ¡£¬½«ÏÔÊ¾½á¹û
iter_num_pre=50;     % Ô¤±àÂëµÄÒëÂëµü´ú´ÎÊý
iter_num_LT=50;      % LTÂëµÄÒëÂëµü´ú´ÎÊý

% code_rate_vec=[1/3];        % Âë×Ö×ÜÂëÂÊ    
code_rate_pre=0.98;   % Ô¤±àÂëÂëÂÊ
N0=round(K/code_rate_pre);   % Ô¤±àÂëÂë³¤
% N_vec=round(K./code_rate_vec);  % RaptorÂë³¤

switch dist_num
    case 2019.298  % ²âÊÔ£¬sigma_n_2=0.977^2; alpha_star=10; beta=9.613244502733293;  design_OH= 1.040231526115532;     Pe_target=3.9e-2;  D=100
        out_node_index=[    6     7    38    39]; 
        out_node_degree(out_node_index)=[  0.846815465372582   0.045038486769935   0.000613563333579   0.107532484523904]
   case 2016.977
       out_node_index=[1:20 200];   
       out_node_degree(out_node_index)=[0.0044 0.0046 0.0055 0.0048 0.3327 0.4143 0.0875 0.0758 0.0059 0.005 0.0054 0.0059 0.0047 0.0034 0.0026 0.0012 0.001 0.0008 0.0006 0.0003 0.0332]; 
    case 2019  % ²âÊÔ£¬rho=0.7; sigma_2=0.9786^2/rho;  sigma_n_2=0.05^2; alpha_star=10; design_OH= 1.797837808421577;     Pe_target=3e-3;  D=50
        out_node_index=[ 5     6    30    31 ]; 
        out_node_degree(out_node_index)=[0.143739573921700   0.728784661257046   0.124207861387834   0.003267903433419];
    case 0     % BECÏÂÓÅ»¯½á¹û
       out_node_index=[1 2 3 4 5 8 9 19 65 66] 
       out_node_degree(out_node_index)=[0.007969 0.493570 0.166220 0.072646 0.082558 0.056058 0.037229 0.055590 0.025023 0.003135]
    case 1
       out_node_index=[1 2 3 4 5 8 14 30 33 200] 
       out_node_degree(out_node_index)=[0.006 0.492 0.0339 0.2403 0.006 0.095 0.049 0.018 0.0356 0.033] 
    case 2
       out_node_index=[1 2 3 4 10 11 22 23] 
       out_node_degree(out_node_index)=[0.00428 0.49924 0.01242 0.34367 0.04604 0.06181 0.02163 0.01091] 
    case 3
        out_node_index=[ 1     2     3     7    16    17    37    38 ] 
        out_node_degree(out_node_index)=[0.009364273210300   0.410234613104715   0.301519785518264   0.199072274957257   0.010269147692577 0.017334209896563   0.008466133334274   0.043739562286049]
end

dv_vec=[3*ones(1,10) 4*ones(1,N0-10)];  % Ô¤±àÂë¶È·Ö²¼£¬×¢ÒâÓÉÓÚÊÇÏßÐÔ±àÂë£¬Ç°Ãæ¼¸ÁÐ¿ÉÓÃµÄÐÐÊý²»¶à£¬Èç¹û¶È·Ö²¼Êý¹ý´óÒ×Ôì³É4»·

% search_num=0;
% while (1)     %Éú³ÉÔ¤±àÂëµÄÐ£Ñé¾ØÕó
fprintf('ÕýÔÚ¶ÔÍâÂë½øÐÐÏßÐÔPEG±àÂë£¬ÇëÉÔµÈ...\n');
H_pre=Linear_time_PEG(N0-K,N0,dv_vec);  % Ô¤±àÂëµÄÐ£Ñé¾ØÕó % load H_pre_good;  fprintf('µ±Ç°ÊÇ¼ÓÔØ¾ØÕó\n')% ´æ´¢ÁËÒ»¸öÑÐ¾¿¹ý³ÌÖÐ¡°ºÃ¡±µÄ¾ØÕó
% save H_pre_fixed H_pre;
% load H_pre_fixed;fprintf('Ô¤±àÂëÊ¹ÓÃÒÑÓÐ¾ØÕó\n');
% Check_H=H_pre'*H_pre;                   % ¼ìÑéÊÇ·ñÓÐ»·4
% for ii=1:N0 Check_H(ii,ii)=0;end;   
% if isempty(find(Check_H>=2,1))==1      % ËµÃ÷Ã»ÓÐ»·4
%     fprintf('ÎÞ4»·\n')
% %     break;
% else 
% %    [H_pre,modified_row_num]=removal_g4c_for_LPEG(H_pre);
% %    fprintf('×¢Òâ£ºÓÐ4»·£¬Ð£Ñé¾ØÕó½øÐÐÁËÐÞ¸Ä');
%    fprintf('×¢Òâ£ºÓÐ4»·£¬µ«ÕâÊÇ¸ßÂëÂÊÂë£¬Ð£Ñé¾ØÕó²»×öÐÞ¸Ä\n');
% %    break;
% end;
   
% search_num=search_num+1;
% if search_num>=10
% %     error('¾­¹ýÔ¤±àÂëÐ£Ñé¾ØÕóµÄ¹æ¶¨ËÑË÷´ÎÊý£¬Í£Ö¹ËÑË÷£¡');
%    [H_pre,modified_row_num]=removal_g4c(H_pre);
%    break;
% end;
% end; % while(1)
% fprintf('ÒÑÍê³ÉÔ¤±àÂëµÄÐ£Ñé¾ØÕó\n');
% dv=4*ones(1,N0);  % LDPC ÂëµÄ·Ö²¼
% H_pre=Linear_time_regular_Possion(N0-K,N0,dv(1));
% load G1_19600_10000;

if code_mode==0
    fprintf('µ±Ç°Ñ¡ÔñµÄÊÇ·ÇÏµÍ³Âë\n');
else
    fprintf('µ±Ç°Ñ¡ÔñµÄÊÇÏµÍ³Âë\n');
end
    
% fprintf('RaptorÂëÐÅÏ¢³¤¶ÈÎª%d,Âë³¤ºÍÂëÂÊ·Ö±ÈÎª:\n',K);
% for ii=1:length(N_vec)
%     fprintf('%d',N_vec(ii));
% end
% fprintf('\n');
% for ii=1:length(code_rate_vec)
%     fprintf('%2.5f',code_rate_vec(ii));
% end
% fprintf('\n');
%%%%%%%%%%%%%%%%%%%%%%%%%% ·ÂÕæÓëËã·¨²ÎÊýÉèÖÃ  %%%%%%%%%%%%%%%%%%%%%%%%%%%%%

%%%%%%%%%%%%%%%%%%%%%%%%%%%%%%%%%%%%%%%%%%%%%%%%%%%%%%%%%%%%%%%%%%%%%%%%%%%
PER_LT=zeros(1,Length_var);  % LTÂëÎóÖ¡ÂÊ
BER_LT=PER_LT;
PER=zeros(1,Length_var);    % RaptorÂëÎóÖ¡ÂÊ
BER=PER;                                            % ÎóÂëÂÊ      
for ii=1:Length_var
    if fixed_OH==1  
        sigma=sigma_vec(ii);
        EsN0indB=EsN0indB_vec(ii);
    else
        overhead=overhead_vec(ii);
    end
    
    if code_mode==1   % ÏµÍ³Âë
        N=round(N0*(1+overhead));
    else              % ·ÇÏµÍ³Âë
        N=round(N0*overhead);  
    end
%     N=N_vec(N_index);
    code_rate=K/N;  % Êµ¼ÊÂëÂÊ
    A1=Raptor_encode_weak_distr(N0,N-N0*code_mode,out_node_degree);
    switch code_mode
        case 0                      % ·ÇÏµÍ³LTÂëÉú³É¾ØÕó
            G_LT=A1;
        case 1                      % ÏµÍ³LTÂëµÄÉú³É¾ØÕó
            G_LT=[speye(N0) A1];
            M=N-N0;                  
            H_full=[A1' speye(M)];    % °´ÕÕLDPCÂëµÄºÍ»ýËã·¨ÒëÂëÊ±ËùÐèµÄÐ£Ñé¾ØÕó
            H=A1';                  % °´ÕÕÏµÍ³LTÂëºÍ»ýËã·¨ÒëÂëÊ±µÄÐ£Ñé¾ØÕó ²Î¼ûÎÄÏ×2016-Optimization Design and Asymptotic Analysis of Systematic Luby Transform Codes over BIAWGN Channels
        otherwise
    end
    
        errbitnum_LT=0;
        errframenum_LT=0;
        errbitnum=0;
        errframenum=0;
        frame_count=0;
        while(frame_count<frame_num)
        frame_count=frame_count+1;
        msg=randperm(K)>K/2;
        LDPC_word=Linear_time_PEG_get_word(H_pre,msg);
        Raptor_code=mod(LDPC_word*G_LT,2);
        switch channel_mode
            case 1
                 a_coeff=1;
                 jam_state=randsrc(1,N,[1 0;rho 1-rho]);
            case 2
                 a_coeff=random('rician',sqrt(Gamma/(1+Gamma)),sqrt(1/2/(1+Gamma))*ones(1,N));
                 a_coeff=a_coeff/(sum(a_coeff.^2)/length(a_coeff));
            case 3
                 a_coeff=random('rician',sqrt(Gamma/(1+Gamma)),sqrt(1/2/(1+Gamma))*ones(1,N));
                 a_coeff=a_coeff/(sum(a_coeff.^2)/length(a_coeff));
            case 4
                  a_coeff=random('nakagami ',naka_m,ones(1,N));
                  a_coeff=a_coeff/(sum(a_coeff.^2)/length(a_coeff));
            otherwise
        end
        Raptor_rece=a_coeff.*(1-2*Raptor_code)+jam_state.*(sigma*randn(1,N))+sigma_n*randn(1,N);
        L_rate_all=a_coeff.*2./(sigma^2*jam_state+sigma_n^2).*Raptor_rece;
        if code_mode==0             %  ·ÇÏµÍ³ÂëÒëÂë
           L_rate=L_rate_all;
           L_rate(L_rate>20)=20;
           L_rate(L_rate<-20)=-20;
           G_modi=G_LT;
           [d_code,soft_LT_msg] = LT_soft_decode(L_rate,G_modi,iter_num_LT);
           soft_LT_msg(soft_LT_msg==0)=1e-10;
           [d_msg_all, success, soft_msg,iternum_inprac] = Log_SP_decode(soft_LT_msg/zoom_in,H_pre,iter_num_pre);
           d_msg=d_msg_all(end-K+1:end);
        else                         %  ÏµÍ³Âë
            L_rate=L_rate_all;
            [d_code,success_LT,soft_LT_msg,k] = sys_LT_Log_SP_decode(L_rate,H,iter_num_LT);    
            [d_msg_all, success, soft_msg,iternum_inprac] = Log_SP_decode(soft_LT_msg,H_pre,iter_num_pre);
            d_msg=d_msg_all(end-K+1:end);
        end
        
        
        [num_LT,rat_LT]=biterr(d_code,LDPC_word);  % LTÂëµÄÎóÂëÂÊ
        errbitnum_LT=errbitnum_LT+num_LT;
        errframenum_LT=errframenum_LT+(num_LT~=0);
        if mod(frame_count,show_time)==0
            if fixed_OH==0
              fprintf('LTÂë£¬µ±Ç°¿ªÏú=%2.2f,µ±Ç°Ö¡ÊýÎª%d, ÎóÖ¡ÂÊPER=%2.5e,ÎóÂëÂÊBER=%2.5e\n',overhead,frame_count,errframenum_LT/frame_count,errbitnum_LT/(N0*frame_count));
            else
              fprintf('LTÂë£¬µ±Ç°·ûºÅÐÅ¸É±È=%2.2f,µ±Ç°Ö¡ÊýÎª%d, ÎóÖ¡ÂÊPER=%2.5e,ÎóÂëÂÊBER=%2.5e\n',EsN0indB,frame_count,errframenum_LT/frame_count,errbitnum_LT/(N0*frame_count));  
            end
        end
        
        [num_R,rat_R]=biterr(d_msg,msg);
        errbitnum=errbitnum+num_R;
        errframenum=errframenum+(num_R~=0);
        if mod(frame_count,show_time)==0
          if fixed_OH==0
              fprintf('RaptorÂë£¬µ±Ç°¿ªÏú=%2.2f,µ±Ç°Ö¡ÊýÎª%d, ÎóÖ¡ÂÊPER=%2.5e,ÎóÂëÂÊBER=%2.5e\n',overhead,frame_count,errframenum/frame_count,errbitnum/(K*frame_count));
            else
              fprintf('RaptorÂë£¬µ±Ç°·ûºÅÐÅ¸É±È=%2.2f,µ±Ç°Ö¡ÊýÎª%d, ÎóÖ¡ÂÊPER=%2.5e,ÎóÂëÂÊBER=%2.5e\n',EsN0indB,frame_count,errframenum_/frame_count,errbitnum/(K*frame_count));  
          end
        end
        
        if errbitnum>=200 && errframenum>=50    % Èç¹ûÊÇ²âÊÔRaptorÂëÓ¦¸Ã»»Îªerrbitnum ºÍerrframenum
           fprintf('´íÎó±ÈÌØÊýºÍÖ¡Êý¶¼´ïµ½Ò»¶¨Á¿£¬ÐèÒªÔö¼Ó¿ªÏú\n');
           break;
        end
        
        end  %while(frame_count<frame_num)
        PER_LT(ii)=errframenum_LT/frame_count;
        BER_LT(ii)=errbitnum_LT/(N0*frame_count);
        PER(ii)=errframenum/frame_count;
        BER(ii)=errbitnum/(K*frame_count);
        if fixed_OH==0
           fprintf('µ±Ç°ÐÅµÀ±ê×¼²î=%2.2f,¿ªÏú=%2.2f,µ±Ç°Ö¡ÊýÎª%d, LTÂëÎóÂëÂÊBER_LT=%2.5e,RaptorÎóÂëÂÊBER=%2.5e\n',sigma,overhead,frame_count,BER_LT(ii),BER(ii));
        else
           fprintf('µ±Ç°·ûºÅÐÅ¸É±È=%2.2f,¿ªÏú=%2.2f,µ±Ç°Ö¡ÊýÎª%d, LTÂëÎóÂëÂÊBER_LT=%2.5e,RaptorÎóÂëÂÊBER=%2.5e\n',EsN0indB,overhead,frame_count,BER_LT(ii),BER(ii));
        end
    if BER(ii)<1e-5
        fprintf('RaptorÎóÂëÂÊ´ïµ½ÒªÇó£¬²»ÔÙÔö¼ÓÐÅÔë±È\n');
        break;
    end

end %for ii=1:Length_var

fprintf('ÐÅµÀ±ê×¼²î·¶Î§Îª£º\n');
for ii=1:length(sigma_vec)
    fprintf('%2.2f  ',sigma_vec(ii));
end
fprintf('\n');
fprintf('¿ªÏú·¶Î§Îª£º\n');
for ii=1:length(overhead_vec)
    fprintf('%2.2f  ',overhead_vec(ii));
end
fprintf('\n');
fprintf('LTÎóÂëÂÊBER_LTÎª£º\n');
for ii=1:length(BER_LT)
    fprintf('%2.5e  ',BER_LT(ii));
end
fprintf('\n');
fprintf('RaptorÎóÂëÂÊBERÎª£º\n');
for ii=1:length(BER)
    fprintf('%2.5e  ',BER(ii));
end
fprintf('\n');
% semilogy(PER);
if fixed_OH==0
   semilogy(overhead_vec,BER,'-');  
else
   semilogy(sigma_vec,BER,'-');  
end
toc;
diary off;
