# Supplementary material for: An Efficient Design of Systematic Rateless Codes
Source: Hindawi journal article supplement (doi:10.1155/2020/8068414), 2020-05-19
Supplement: f1 [file 8068414.f1.zip › supplementary files/Matlab_code_for_Figure1/BER_by_Simulation/Raptor_encode_weak_distr.m]

function Gmatrix=Raptor_encode_weak_distr(K,N,out_node_degree)
% K=length(msg);

degree_index=find(out_node_degree~=0);
degree_distribution=out_node_degree;
 degree_number=round(N*degree_distribution);  %Ã¿¸ö¶È¶ÔÓ¦µÄÊµ¼Ê±ÈÌØ¸öÊý
        if N-sum(degree_number(degree_index(1:end-1)))>0
           degree_number(degree_index(end))=N-sum(degree_number(degree_index(1:end-1)));
        elseif N-sum(degree_number(degree_index(1:end-1)))==0             % Èç¹ûÂë³¤Ì«¶Ì£¬»á³öÏÖÓÐµÄ·Ö²¼Ã»ÓÐ±ÈÌØµÄÇé¿ö£¬ÄÇÃ´È¥µô·Ö²¼¸ÅÂÊÐ¡µÄ
           degree_number(degree_index(end))=0;
        elseif N-sum(degree_number(degree_index(1:end-1)))==-1
               degree_number(degree_index(end))=0;
               degree_number(degree_index(1))=degree_number(degree_index(1))-1;
        else
         error('The code length is too short')
        end
        
% switch dist_num
%     case 1
% degree_distribution=zeros(1,K);
% degree_distribution(1)=0.007969;
% degree_distribution(2)=0.493570;
% degree_distribution(3)=0.166220;
% degree_distribution(4)=0.072646;
% degree_distribution(5)=0.082558;
% degree_distribution(8)=0.056058;
% degree_distribution(9)=0.037229;
% degree_distribution(19)=0.055590;
% degree_distribution(65)=0.025023;
% degree_distribution(66)=0.003135;
% 
% 
% degree_number=round(N*degree_distribution);  %Ã¿¸ö¶È¶ÔÓ¦µÄÊµ¼Ê±ÈÌØ¸öÊý
% if N-sum(degree_number(1:65))>0
%    degree_number(66)=N-sum(degree_number(1:65));
% elseif N-sum(degree_number(1:65))==0             % Èç¹ûÂë³¤Ì«¶Ì£¬»á³öÏÖÓÐµÄ·Ö²¼Ã»ÓÐ±ÈÌØµÄÇé¿ö£¬ÄÇÃ´È¥µô·Ö²¼¸ÅÂÊÐ¡µÄ
%     degree_number(66)=0;
% elseif N-sum(degree_number(1:65))==-1
%     degree_number(66)=0;
%     degree_number(1)=degree_number(1)-1;
% else
%     error('The code length is too short')
% end
% 
%     case 2
%         degree_index=[1 2 3 4 10 11 22 23];
%         degree_distribution(degree_index)=[0.00428 0.49924 0.01242 0.34367 0.04604 0.06181 0.02163 0.01091];
%         degree_number=round(N*degree_distribution);  %Ã¿¸ö¶È¶ÔÓ¦µÄÊµ¼Ê±ÈÌØ¸öÊý
%         if N-sum(degree_number(degree_index(1:end-1)))>0
%            degree_number(degree_index(end))=N-sum(degree_number(degree_index(1:end-1)));
%         elseif N-sum(degree_number(degree_index(1:end-1)))==0             % Èç¹ûÂë³¤Ì«¶Ì£¬»á³öÏÖÓÐµÄ·Ö²¼Ã»ÓÐ±ÈÌØµÄÇé¿ö£¬ÄÇÃ´È¥µô·Ö²¼¸ÅÂÊÐ¡µÄ
%            degree_number(degree_index(end))=0;
%         elseif N-sum(degree_number(degree_index(1:end-1)))==-1
%                degree_number(degree_index(end))=0;
%                degree_number(degree_index(1))=degree_number(degree_index(1))-1;
%         else
%          error('The code length is too short')
%         end;
%         
%     case 3
%          degree_index=[1:18 200];
%         degree_distribution(degree_index)=[0.0036 0.0061 0.0106 0.0226 0.1337 0.6927 0.0024 0.0607 0.0097 0.0128 0.0049 0.0028 0.0013 0.0011 0.0009 0.0007 0.0005 0.0003 0.0326];
%         degree_number=round(N*degree_distribution);  %Ã¿¸ö¶È¶ÔÓ¦µÄÊµ¼Ê±ÈÌØ¸öÊý
%         if N-sum(degree_number(degree_index(1:end-1)))>0
%            degree_number(degree_index(end))=N-sum(degree_number(degree_index(1:end-1)));
%         elseif N-sum(degree_number(degree_index(1:end-1)))==0             % Èç¹ûÂë³¤Ì«¶Ì£¬»á³öÏÖÓÐµÄ·Ö²¼Ã»ÓÐ±ÈÌØµÄÇé¿ö£¬ÄÇÃ´È¥µô·Ö²¼¸ÅÂÊÐ¡µÄ
%            degree_number(degree_index(end))=0;
%         elseif N-sum(degree_number(degree_index(1:end-1)))==-1
%                degree_number(degree_index(end))=0;
%                degree_number(degree_index(1))=degree_number(degree_index(1))-1;
%         else
%          error('The code length is too short')
%         end;
%      case 4
%          degree_index=[1  4 12 200];
%         degree_distribution(degree_index)=[0.011102934621143  0.701540590182945  0.258282095983411 0.029074379212501];
%         degree_number=round(N*degree_distribution);  %Ã¿¸ö¶È¶ÔÓ¦µÄÊµ¼Ê±ÈÌØ¸öÊý
%         if N-sum(degree_number(degree_index(1:end-1)))>0
%            degree_number(degree_index(end))=N-sum(degree_number(degree_index(1:end-1)));
%         elseif N-sum(degree_number(degree_index(1:end-1)))==0             % Èç¹ûÂë³¤Ì«¶Ì£¬»á³öÏÖÓÐµÄ·Ö²¼Ã»ÓÐ±ÈÌØµÄÇé¿ö£¬ÄÇÃ´È¥µô·Ö²¼¸ÅÂÊÐ¡µÄ
%            degree_number(degree_index(end))=0;
%         elseif N-sum(degree_number(degree_index(1:end-1)))==-1
%                degree_number(degree_index(end))=0;
%                degree_number(degree_index(1))=degree_number(degree_index(1))-1;
%         else
%          error('The code length is too short')
%         end
%      case 5
%          degree_index=[1:5 8 14 30 33 200];
%         degree_distribution(degree_index)=[0.006 0.492 0.0339 0.2403 0.006 0.095 0.049 0.018 0.0356 0.033];
%         degree_number=round(N*degree_distribution);  %Ã¿¸ö¶È¶ÔÓ¦µÄÊµ¼Ê±ÈÌØ¸öÊý
%         if N-sum(degree_number(degree_index(1:end-1)))>0
%            degree_number(degree_index(end))=N-sum(degree_number(degree_index(1:end-1)));
%         elseif N-sum(degree_number(degree_index(1:end-1)))==0             % Èç¹ûÂë³¤Ì«¶Ì£¬»á³öÏÖÓÐµÄ·Ö²¼Ã»ÓÐ±ÈÌØµÄÇé¿ö£¬ÄÇÃ´È¥µô·Ö²¼¸ÅÂÊÐ¡µÄ
%            degree_number(degree_index(end))=0;
%         elseif N-sum(degree_number(degree_index(1:end-1)))==-1
%                degree_number(degree_index(end))=0;
%                degree_number(degree_index(1))=degree_number(degree_index(1))-1;
%         else
%          error('The code length is too short')
%         end   
%      case 6
%          degree_index=[9 10 35 100];
%         degree_distribution(degree_index)=[0.685700597811936 0.216622419070841 0.007854901203671 0.089822081913553];
%         degree_number=round(N*degree_distribution);  %Ã¿¸ö¶È¶ÔÓ¦µÄÊµ¼Ê±ÈÌØ¸öÊý
%         if N-sum(degree_number(degree_index(1:end-1)))>0
%            degree_number(degree_index(end))=N-sum(degree_number(degree_index(1:end-1)));
%         elseif N-sum(degree_number(degree_index(1:end-1)))==0             % Èç¹ûÂë³¤Ì«¶Ì£¬»á³öÏÖÓÐµÄ·Ö²¼Ã»ÓÐ±ÈÌØµÄÇé¿ö£¬ÄÇÃ´È¥µô·Ö²¼¸ÅÂÊÐ¡µÄ
%            degree_number(degree_index(end))=0;
%         elseif N-sum(degree_number(degree_index(1:end-1)))==-1
%                degree_number(degree_index(end))=0;
%                degree_number(degree_index(1))=degree_number(degree_index(1))-1;
%         else
%          error('The code length is too short')
%         end   
%      
%     case 7 
%         degree_index=[1:18 45 100];
%         degree_distribution(degree_index)=[0.001747437631236   0.000873718815618   0.000582479210412   0.000436859407809   0.000349487526247...
% 0.000291239605206   0.000249633947319   0.000218429703904   0.823566235765209   0.000174743763124...
% 0.000158857966476   0.073124161304675   0.000134418279326   0.000124816973660   0.000116495842082...
%  0.000109214851952   0.000102790448896   0.000097079868402   0.010299287174641  0.087242611913805];
%         degree_number=round(N*degree_distribution);  %Ã¿¸ö¶È¶ÔÓ¦µÄÊµ¼Ê±ÈÌØ¸öÊý
%         if N-sum(degree_number(degree_index(1:end-1)))>0
%            degree_number(degree_index(end))=N-sum(degree_number(degree_index(1:end-1)));
%         elseif N-sum(degree_number(degree_index(1:end-1)))==0             % Èç¹ûÂë³¤Ì«¶Ì£¬»á³öÏÖÓÐµÄ·Ö²¼Ã»ÓÐ±ÈÌØµÄÇé¿ö£¬ÄÇÃ´È¥µô·Ö²¼¸ÅÂÊÐ¡µÄ
%            degree_number(degree_index(end))=0;
%         elseif N-sum(degree_number(degree_index(1:end-1)))==-1
%                degree_number(degree_index(end))=0;
%                degree_number(degree_index(1))=degree_number(degree_index(1))-1;
%         else
%          error('The code length is too short')
%         end   
%     otherwise
%         error('ÇëÊäÈëÕýÈ·µÄ¶È·Ö²¼ÐòºÅ£¡\n');
% end;

Gmatrix=sparse(K,N);  %Éú³É¾ØÕó
col_index=randperm(N);
[row_dn,col_dn,v_dn]=find(degree_number);
temp=zeros(1,N);
flag=0;
windows=0;
for i=1:length(col_dn)   %È·¶¨Ã¿¸ö±ÈÌØ¶ÔÓ¦µÄ¶ÈÊý
    windows=v_dn(i);    
    temp(col_index(flag+1:flag+windows))=col_dn(i);
    flag=flag+windows;
end;

for i=1:N              %È·¶¨Ã¿ÁÐÄÄÐ©ÔªËØÎª1
    row_index=randperm(K);
    Gmatrix(row_index(1:temp(i)),i)=1;
end;
Gmatrix=sparse(Gmatrix);
% msg=randperm(K)>(K/2);
% en_msg=mod((msg*Gmatrix),2);
