# Supplementary material for: An Efficient Design of Systematic Rateless Codes
Source: Hindawi journal article supplement (doi:10.1155/2020/8068414), 2020-05-19
Supplement: f1 [file 8068414.f1.zip › supplementary files/Matlab_code_for_Figure1/BER_by_Simulation/Raptor_encode_weak_distr1.m]

function Gmatrix=Raptor_encode_weak_distr(K,N,dist_num)
% K=length(msg);
switch dist_num
    case 1
degree_distribution=zeros(1,K);
degree_distribution(1)=0.007969;
degree_distribution(2)=0.493570;
degree_distribution(3)=0.166220;
degree_distribution(4)=0.072646;
degree_distribution(5)=0.082558;
degree_distribution(8)=0.056058;
degree_distribution(9)=0.037229;
degree_distribution(19)=0.055590;
degree_distribution(65)=0.025023;
degree_distribution(66)=0.003135;


degree_number=round(N*degree_distribution);  %Ã¿¸ö¶È¶ÔÓ¦µÄÊµ¼Ê±ÈÌØ¸öÊý
if N-sum(degree_number(1:65))>0
   degree_number(66)=N-sum(degree_number(1:65));
elseif N-sum(degree_number(1:65))==0             % Èç¹ûÂë³¤Ì«¶Ì£¬»á³öÏÖÓÐµÄ·Ö²¼Ã»ÓÐ±ÈÌØµÄÇé¿ö£¬ÄÇÃ´È¥µô·Ö²¼¸ÅÂÊÐ¡µÄ
    degree_number(66)=0;
elseif N-sum(degree_number(1:65))==-1
    degree_number(66)=0;
    degree_number(1)=degree_number(1)-1;
else
    error('The code length is too short')
end;

    case 2
        degree_index=[1 2 3 4 10 11 22 23];
        degree_distribution(degree_index)=[0.00428 0.49924 0.01242 0.34367 0.04604 0.06181 0.02163 0.01091];
        degree_number=round(N*degree_distribution);  %Ã¿¸ö¶È¶ÔÓ¦µÄÊµ¼Ê±ÈÌØ¸öÊý
        if N-sum(degree_number(degree_index(1:end-1)))>0
           degree_number(degree_index(end))=N-sum(degree_number(degree_index(1:end-1)));
        elseif N-sum(degree_number(degree_index(1:end-1)))==0             % Èç¹ûÂë³¤Ì«¶Ì£¬»á³öÏÖÓÐµÄ·Ö²¼Ã»ÓÐ±ÈÌØµÄÇé¿ö£¬ÄÇÃ´È¥µô·Ö²¼¸ÅÂÊÐ¡µÄ
           degree_number(degree_index(end))=0;
        elseif N-sum(degree_number(degree_index(1:end-1)))==-1
               degree_number(degree_index(end))=0;
               degree_number(degree_index(1))=degree_number(degree_index(1))-1;
        else
         error('The code length is too short')
        end;
        
    otherwise
        error('ÇëÊäÈëÕýÈ·µÄ¶È·Ö²¼ÐòºÅ£¡\n');
end;

Gmatrix=sparse(K,N);  %Éú³É¾ØÕó
col_index=randperm(N);
[row_dn,col_dn,v_dn]=find(degree_number);
temp=zeros(1,N);
flag=0;
windows=0;
for i=1:length(col_dn)   %È·¶¨Ã¿¸ö±ÈÌØ¶ÔÓ¦µÄ¶ÈÊý
    windows=v_dn(i);    
    temp(col_index(flag+1:flag+windows))=col_dn(i);
    flag=flag+windows;
end;

for i=1:N              %È·¶¨Ã¿ÁÐÄÄÐ©ÔªËØÎª1
    row_index=randperm(K);
    Gmatrix(row_index(1:temp(i)),i)=1;
end;
Gmatrix=sparse(Gmatrix);
% msg=randperm(K)>(K/2);
% en_msg=mod((msg*Gmatrix),2);
