# Supplementary material for: An Efficient Design of Systematic Rateless Codes
Source: Hindawi journal article supplement (doi:10.1155/2020/8068414), 2020-05-19
Supplement: f1 [file 8068414.f1.zip › supplementary files/Matlab_code_for_Figure1/BER_by_Simulation/removal_g4c_for_LPEG.m]

%%% 20170901 Ïû³ýldpcÂëÐ£Ñé¾ØÕóµÄ4»·  % 
function [H,modified_row_num]=removal_g4c_for_LPEG(H)
[row,col]=size(H);
modified_row_num=0;  % ¼ÆÊý£¬¶àÉÙÐÐ±»ÐÞ¸Ä
 for i=1:row
        for j=(i+1):row
            sp=and(H(i,:),H(j,:));       % ¶ÔÁ½ÐÐ½øÐÐµã³Ë£¬¿´¿´½á¹ûÎª1µÄÔªËØÓÐ¼¸¸ö£¬Èç¹û³¬¹ý1¸öÒÔÉÏ¾ÍËµÃ÷ÓÐ»·4
            csp=find(sp);
            c1=length(csp);
            if c1>1
                modified_row_num=modified_row_num+1;
                if length(find(H(i,:)))<length(find(H(j,:)))  
                    for cp=2:c1              % É¾ºóÃæÁÐÖÐµÄ1£¬±ÜÃâ°ÑÏßÐÔ±àÂëÇ°KÁÐ¶Ô½ÇÏßÉÏµÄ1É¾ÁË
                        H(j,csp(cp))=0;      % Èç¹ûµÚiÐÐÖÐ1µÄ¸öÊý±ÈµÚjÐÐÖÐÉÙ£¬ÄÇÃ´°ÑµÚjÐÐÖÐÓëµÚiÐÐÖØºÏµÄÇ°cl-1¸ö1±äÎª0£¨µÚcl¸öÈÔÈ»±£Áô£©
                    end; % for cp
                else
                    for cp=2:c1
                        H(i,csp(cp))=0;      % µÚiÐÐµÄ1¸öÊý±ÈµÚjÐÐÖÐµÄ¶àµÄ´¦Àí¡£
                    end; % for cp
                end; % if length
            end; % if c1>1
        end;% for j
 end; % for i=1:row
