# Supplementary material for: An Efficient Design of Systematic Rateless Codes
Source: Hindawi journal article supplement (doi:10.1155/2020/8068414), 2020-05-19
Supplement: f1 [file 8068414.f1.zip › supplementary files/Matlab_code_for_Figure1/BER_by_Simulation/实际码字结果/AWGN_dist2016977_K1960_S.txt]

20190612²âÊÔËõÐ¡ÄÚÂëÊä³öLLRÐ§¹û£¬ÇÒËõ¼õÒò×ÓÎª

zoom_in =

     1


rho =

     0


sigma_n_2 =

   0.954529000000000


sigma_vec =

   Inf


dist_num =

     2.016977000000000e+03

µ±Ç°ÐÅµÀÎªPBIÐÅµÀ
K =

        1960

ÕýÔÚ¶ÔÍâÂë½øÐÐÏßÐÔPEG±àÂë£¬ÇëÉÔµÈ...
µ±Ç°Ñ¡ÔñµÄÊÇÏµÍ³Âë
´íÎó±ÈÌØÊýºÍÖ¡Êý¶¼´ïµ½Ò»¶¨Á¿£¬ÐèÒªÔö¼Ó¿ªÏú
µ±Ç°ÐÅµÀ±ê×¼²î=100.00,¿ªÏú=0.50,µ±Ç°Ö¡ÊýÎª20, LTÂëÎóÂëÂÊBER_LT=1.32925e-01,RaptorÎóÂëÂÊBER=1.33061e-01
´íÎó±ÈÌØÊýºÍÖ¡Êý¶¼´ïµ½Ò»¶¨Á¿£¬ÐèÒªÔö¼Ó¿ªÏú
µ±Ç°ÐÅµÀ±ê×¼²î=100.00,¿ªÏú=0.60,µ±Ç°Ö¡ÊýÎª20, LTÂëÎóÂëÂÊBER_LT=1.37900e-01,RaptorÎóÂëÂÊBER=1.37959e-01
´íÎó±ÈÌØÊýºÍÖ¡Êý¶¼´ïµ½Ò»¶¨Á¿£¬ÐèÒªÔö¼Ó¿ªÏú
µ±Ç°ÐÅµÀ±ê×¼²î=100.00,¿ªÏú=0.70,µ±Ç°Ö¡ÊýÎª20, LTÂëÎóÂëÂÊBER_LT=1.25600e-01,RaptorÎóÂëÂÊBER=1.25765e-01
´íÎó±ÈÌØÊýºÍÖ¡Êý¶¼´ïµ½Ò»¶¨Á¿£¬ÐèÒªÔö¼Ó¿ªÏú
µ±Ç°ÐÅµÀ±ê×¼²î=100.00,¿ªÏú=0.80,µ±Ç°Ö¡ÊýÎª20, LTÂëÎóÂëÂÊBER_LT=1.14100e-01,RaptorÎóÂëÂÊBER=1.14133e-01
´íÎó±ÈÌØÊýºÍÖ¡Êý¶¼´ïµ½Ò»¶¨Á¿£¬ÐèÒªÔö¼Ó¿ªÏú
µ±Ç°ÐÅµÀ±ê×¼²î=100.00,¿ªÏú=0.90,µ±Ç°Ö¡ÊýÎª20, LTÂëÎóÂëÂÊBER_LT=8.68750e-02,RaptorÎóÂëÂÊBER=8.66582e-02
´íÎó±ÈÌØÊýºÍÖ¡Êý¶¼´ïµ½Ò»¶¨Á¿£¬ÐèÒªÔö¼Ó¿ªÏú
µ±Ç°ÐÅµÀ±ê×¼²î=100.00,¿ªÏú=1.00,µ±Ç°Ö¡ÊýÎª20, LTÂëÎóÂëÂÊBER_LT=6.68500e-02,RaptorÎóÂëÂÊBER=6.68112e-02
´íÎó±ÈÌØÊýºÍÖ¡Êý¶¼´ïµ½Ò»¶¨Á¿£¬ÐèÒªÔö¼Ó¿ªÏú
µ±Ç°ÐÅµÀ±ê×¼²î=100.00,¿ªÏú=1.10,µ±Ç°Ö¡ÊýÎª20, LTÂëÎóÂëÂÊBER_LT=2.39250e-02,RaptorÎóÂëÂÊBER=2.39541e-02
´íÎó±ÈÌØÊýºÍÖ¡Êý¶¼´ïµ½Ò»¶¨Á¿£¬ÐèÒªÔö¼Ó¿ªÏú
µ±Ç°ÐÅµÀ±ê×¼²î=100.00,¿ªÏú=1.20,µ±Ç°Ö¡ÊýÎª24, LTÂëÎóÂëÂÊBER_LT=8.27083e-03,RaptorÎóÂëÂÊBER=8.33333e-03
´íÎó±ÈÌØÊýºÍÖ¡Êý¶¼´ïµ½Ò»¶¨Á¿£¬ÐèÒªÔö¼Ó¿ªÏú
µ±Ç°ÐÅµÀ±ê×¼²î=100.00,¿ªÏú=1.30,µ±Ç°Ö¡ÊýÎª29, LTÂëÎóÂëÂÊBER_LT=4.72414e-03,RaptorÎóÂëÂÊBER=4.73258e-03
´íÎó±ÈÌØÊýºÍÖ¡Êý¶¼´ïµ½Ò»¶¨Á¿£¬ÐèÒªÔö¼Ó¿ªÏú
µ±Ç°ÐÅµÀ±ê×¼²î=100.00,¿ªÏú=1.40,µ±Ç°Ö¡ÊýÎª66, LTÂëÎóÂëÂÊBER_LT=1.56818e-03,RaptorÎóÂëÂÊBER=1.10544e-03
LTÂë£¬µ±Ç°¿ªÏú=1.50,µ±Ç°Ö¡ÊýÎª100, ÎóÖ¡ÂÊPER=9.00000e-02,ÎóÂëÂÊBER=1.75000e-04
RaptorÂë£¬µ±Ç°¿ªÏú=1.50,µ±Ç°Ö¡ÊýÎª100, ÎóÖ¡ÂÊPER=2.00000e-02,ÎóÂëÂÊBER=8.67347e-05
LTÂë£¬µ±Ç°¿ªÏú=1.50,µ±Ç°Ö¡ÊýÎª200, ÎóÖ¡ÂÊPER=1.00000e-01,ÎóÂëÂÊBER=3.30000e-04
RaptorÂë£¬µ±Ç°¿ªÏú=1.50,µ±Ç°Ö¡ÊýÎª200, ÎóÖ¡ÂÊPER=4.00000e-02,ÎóÂëÂÊBER=1.98980e-04
´íÎó±ÈÌØÊýºÍÖ¡Êý¶¼´ïµ½Ò»¶¨Á¿£¬ÐèÒªÔö¼Ó¿ªÏú
µ±Ç°ÐÅµÀ±ê×¼²î=100.00,¿ªÏú=1.50,µ±Ç°Ö¡ÊýÎª285, LTÂëÎóÂëÂÊBER_LT=3.50877e-04,RaptorÎóÂëÂÊBER=2.27354e-04
LTÂë£¬µ±Ç°¿ªÏú=1.60,µ±Ç°Ö¡ÊýÎª100, ÎóÖ¡ÂÊPER=6.00000e-02,ÎóÂëÂÊBER=3.00000e-05
RaptorÂë£¬µ±Ç°¿ªÏú=1.60,µ±Ç°Ö¡ÊýÎª100, ÎóÖ¡ÂÊPER=0.00000e+00,ÎóÂëÂÊBER=0.00000e+00
LTÂë£¬µ±Ç°¿ªÏú=1.60,µ±Ç°Ö¡ÊýÎª200, ÎóÖ¡ÂÊPER=6.50000e-02,ÎóÂëÂÊBER=5.75000e-05
RaptorÂë£¬µ±Ç°¿ªÏú=1.60,µ±Ç°Ö¡ÊýÎª200, ÎóÖ¡ÂÊPER=0.00000e+00,ÎóÂëÂÊBER=0.00000e+00
LTÂë£¬µ±Ç°¿ªÏú=1.60,µ±Ç°Ö¡ÊýÎª300, ÎóÖ¡ÂÊPER=5.66667e-02,ÎóÂëÂÊBER=5.83333e-05
RaptorÂë£¬µ±Ç°¿ªÏú=1.60,µ±Ç°Ö¡ÊýÎª300, ÎóÖ¡ÂÊPER=3.33333e-03,ÎóÂëÂÊBER=1.02041e-05
LTÂë£¬µ±Ç°¿ªÏú=1.60,µ±Ç°Ö¡ÊýÎª400, ÎóÖ¡ÂÊPER=5.75000e-02,ÎóÂëÂÊBER=5.62500e-05
RaptorÂë£¬µ±Ç°¿ªÏú=1.60,µ±Ç°Ö¡ÊýÎª400, ÎóÖ¡ÂÊPER=2.50000e-03,ÎóÂëÂÊBER=7.65306e-06
LTÂë£¬µ±Ç°¿ªÏú=1.60,µ±Ç°Ö¡ÊýÎª500, ÎóÖ¡ÂÊPER=5.60000e-02,ÎóÂëÂÊBER=5.00000e-05
RaptorÂë£¬µ±Ç°¿ªÏú=1.60,µ±Ç°Ö¡ÊýÎª500, ÎóÖ¡ÂÊPER=2.00000e-03,ÎóÂëÂÊBER=6.12245e-06
LTÂë£¬µ±Ç°¿ªÏú=1.60,µ±Ç°Ö¡ÊýÎª600, ÎóÖ¡ÂÊPER=5.00000e-02,ÎóÂëÂÊBER=4.41667e-05
RaptorÂë£¬µ±Ç°¿ªÏú=1.60,µ±Ç°Ö¡ÊýÎª600, ÎóÖ¡ÂÊPER=1.66667e-03,ÎóÂëÂÊBER=5.10204e-06
LTÂë£¬µ±Ç°¿ªÏú=1.60,µ±Ç°Ö¡ÊýÎª700, ÎóÖ¡ÂÊPER=4.71429e-02,ÎóÂëÂÊBER=4.64286e-05
RaptorÂë£¬µ±Ç°¿ªÏú=1.60,µ±Ç°Ö¡ÊýÎª700, ÎóÖ¡ÂÊPER=2.85714e-03,ÎóÂëÂÊBER=1.23907e-05
LTÂë£¬µ±Ç°¿ªÏú=1.60,µ±Ç°Ö¡ÊýÎª800, ÎóÖ¡ÂÊPER=5.00000e-02,ÎóÂëÂÊBER=5.31250e-05
RaptorÂë£¬µ±Ç°¿ªÏú=1.60,µ±Ç°Ö¡ÊýÎª800, ÎóÖ¡ÂÊPER=3.75000e-03,ÎóÂëÂÊBER=1.91327e-05
LTÂë£¬µ±Ç°¿ªÏú=1.60,µ±Ç°Ö¡ÊýÎª900, ÎóÖ¡ÂÊPER=5.11111e-02,ÎóÂëÂÊBER=5.05556e-05
RaptorÂë£¬µ±Ç°¿ªÏú=1.60,µ±Ç°Ö¡ÊýÎª900, ÎóÖ¡ÂÊPER=3.33333e-03,ÎóÂëÂÊBER=1.70068e-05
LTÂë£¬µ±Ç°¿ªÏú=1.60,µ±Ç°Ö¡ÊýÎª1000, ÎóÖ¡ÂÊPER=5.10000e-02,ÎóÂëÂÊBER=5.50000e-05
RaptorÂë£¬µ±Ç°¿ªÏú=1.60,µ±Ç°Ö¡ÊýÎª1000, ÎóÖ¡ÂÊPER=4.00000e-03,ÎóÂëÂÊBER=1.88776e-05
LTÂë£¬µ±Ç°¿ªÏú=1.60,µ±Ç°Ö¡ÊýÎª1100, ÎóÖ¡ÂÊPER=5.09091e-02,ÎóÂëÂÊBER=5.86364e-05
RaptorÂë£¬µ±Ç°¿ªÏú=1.60,µ±Ç°Ö¡ÊýÎª1100, ÎóÖ¡ÂÊPER=4.54545e-03,ÎóÂëÂÊBER=2.45826e-05
LTÂë£¬µ±Ç°¿ªÏú=1.60,µ±Ç°Ö¡ÊýÎª1200, ÎóÖ¡ÂÊPER=5.00000e-02,ÎóÂëÂÊBER=6.08333e-05
RaptorÂë£¬µ±Ç°¿ªÏú=1.60,µ±Ç°Ö¡ÊýÎª1200, ÎóÖ¡ÂÊPER=5.00000e-03,ÎóÂëÂÊBER=2.67857e-05
LTÂë£¬µ±Ç°¿ªÏú=1.60,µ±Ç°Ö¡ÊýÎª1300, ÎóÖ¡ÂÊPER=4.76923e-02,ÎóÂëÂÊBER=5.69231e-05
RaptorÂë£¬µ±Ç°¿ªÏú=1.60,µ±Ç°Ö¡ÊýÎª1300, ÎóÖ¡ÂÊPER=4.61538e-03,ÎóÂëÂÊBER=2.47253e-05
LTÂë£¬µ±Ç°¿ªÏú=1.60,µ±Ç°Ö¡ÊýÎª1400, ÎóÖ¡ÂÊPER=5.00000e-02,ÎóÂëÂÊBER=5.89286e-05
RaptorÂë£¬µ±Ç°¿ªÏú=1.60,µ±Ç°Ö¡ÊýÎª1400, ÎóÖ¡ÂÊPER=5.00000e-03,ÎóÂëÂÊBER=2.62391e-05
LTÂë£¬µ±Ç°¿ªÏú=1.60,µ±Ç°Ö¡ÊýÎª1500, ÎóÖ¡ÂÊPER=4.80000e-02,ÎóÂëÂÊBER=5.76667e-05
RaptorÂë£¬µ±Ç°¿ªÏú=1.60,µ±Ç°Ö¡ÊýÎª1500, ÎóÖ¡ÂÊPER=4.66667e-03,ÎóÂëÂÊBER=2.44898e-05
LTÂë£¬µ±Ç°¿ªÏú=1.60,µ±Ç°Ö¡ÊýÎª1600, ÎóÖ¡ÂÊPER=4.56250e-02,ÎóÂëÂÊBER=5.43750e-05
RaptorÂë£¬µ±Ç°¿ªÏú=1.60,µ±Ç°Ö¡ÊýÎª1600, ÎóÖ¡ÂÊPER=4.37500e-03,ÎóÂëÂÊBER=2.29592e-05
LTÂë£¬µ±Ç°¿ªÏú=1.60,µ±Ç°Ö¡ÊýÎª1700, ÎóÖ¡ÂÊPER=4.52941e-02,ÎóÂëÂÊBER=5.23529e-05
RaptorÂë£¬µ±Ç°¿ªÏú=1.60,µ±Ç°Ö¡ÊýÎª1700, ÎóÖ¡ÂÊPER=4.11765e-03,ÎóÂëÂÊBER=2.16086e-05
LTÂë£¬µ±Ç°¿ªÏú=1.60,µ±Ç°Ö¡ÊýÎª1800, ÎóÖ¡ÂÊPER=4.61111e-02,ÎóÂëÂÊBER=5.33333e-05
RaptorÂë£¬µ±Ç°¿ªÏú=1.60,µ±Ç°Ö¡ÊýÎª1800, ÎóÖ¡ÂÊPER=4.44444e-03,ÎóÂëÂÊBER=2.46599e-05
´íÎó±ÈÌØÊýºÍÖ¡Êý¶¼´ïµ½Ò»¶¨Á¿£¬ÐèÒªÔö¼Ó¿ªÏú
µ±Ç°ÐÅµÀ±ê×¼²î=100.00,¿ªÏú=1.60,µ±Ç°Ö¡ÊýÎª1883, LTÂëÎóÂëÂÊBER_LT=5.52310e-05,RaptorÎóÂëÂÊBER=2.81791e-05
LTÂë£¬µ±Ç°¿ªÏú=1.70,µ±Ç°Ö¡ÊýÎª100, ÎóÖ¡ÂÊPER=3.00000e-02,ÎóÂëÂÊBER=1.50000e-05
RaptorÂë£¬µ±Ç°¿ªÏú=1.70,µ±Ç°Ö¡ÊýÎª100, ÎóÖ¡ÂÊPER=0.00000e+00,ÎóÂëÂÊBER=0.00000e+00
LTÂë£¬µ±Ç°¿ªÏú=1.70,µ±Ç°Ö¡ÊýÎª200, ÎóÖ¡ÂÊPER=3.50000e-02,ÎóÂëÂÊBER=3.50000e-05
RaptorÂë£¬µ±Ç°¿ªÏú=1.70,µ±Ç°Ö¡ÊýÎª200, ÎóÖ¡ÂÊPER=5.00000e-03,ÎóÂëÂÊBER=1.78571e-05
LTÂë£¬µ±Ç°¿ªÏú=1.70,µ±Ç°Ö¡ÊýÎª300, ÎóÖ¡ÂÊPER=4.00000e-02,ÎóÂëÂÊBER=3.33333e-05
RaptorÂë£¬µ±Ç°¿ªÏú=1.70,µ±Ç°Ö¡ÊýÎª300, ÎóÖ¡ÂÊPER=3.33333e-03,ÎóÂëÂÊBER=1.19048e-05
LTÂë£¬µ±Ç°¿ªÏú=1.70,µ±Ç°Ö¡ÊýÎª400, ÎóÖ¡ÂÊPER=4.25000e-02,ÎóÂëÂÊBER=4.75000e-05
RaptorÂë£¬µ±Ç°¿ªÏú=1.70,µ±Ç°Ö¡ÊýÎª400, ÎóÖ¡ÂÊPER=5.00000e-03,ÎóÂëÂÊBER=2.80612e-05
LTÂë£¬µ±Ç°¿ªÏú=1.70,µ±Ç°Ö¡ÊýÎª500, ÎóÖ¡ÂÊPER=3.60000e-02,ÎóÂëÂÊBER=4.00000e-05
RaptorÂë£¬µ±Ç°¿ªÏú=1.70,µ±Ç°Ö¡ÊýÎª500, ÎóÖ¡ÂÊPER=4.00000e-03,ÎóÂëÂÊBER=2.24490e-05
LTÂë£¬µ±Ç°¿ªÏú=1.70,µ±Ç°Ö¡ÊýÎª600, ÎóÖ¡ÂÊPER=3.16667e-02,ÎóÂëÂÊBER=3.41667e-05
RaptorÂë£¬µ±Ç°¿ªÏú=1.70,µ±Ç°Ö¡ÊýÎª600, ÎóÖ¡ÂÊPER=3.33333e-03,ÎóÂëÂÊBER=1.87075e-05
LTÂë£¬µ±Ç°¿ªÏú=1.70,µ±Ç°Ö¡ÊýÎª700, ÎóÖ¡ÂÊPER=2.71429e-02,ÎóÂëÂÊBER=2.92857e-05
RaptorÂë£¬µ±Ç°¿ªÏú=1.70,µ±Ç°Ö¡ÊýÎª700, ÎóÖ¡ÂÊPER=2.85714e-03,ÎóÂëÂÊBER=1.60350e-05
LTÂë£¬µ±Ç°¿ªÏú=1.70,µ±Ç°Ö¡ÊýÎª800, ÎóÖ¡ÂÊPER=2.62500e-02,ÎóÂëÂÊBER=2.68750e-05
RaptorÂë£¬µ±Ç°¿ªÏú=1.70,µ±Ç°Ö¡ÊýÎª800, ÎóÖ¡ÂÊPER=2.50000e-03,ÎóÂëÂÊBER=1.40306e-05
LTÂë£¬µ±Ç°¿ªÏú=1.70,µ±Ç°Ö¡ÊýÎª900, ÎóÖ¡ÂÊPER=2.66667e-02,ÎóÂëÂÊBER=2.55556e-05
RaptorÂë£¬µ±Ç°¿ªÏú=1.70,µ±Ç°Ö¡ÊýÎª900, ÎóÖ¡ÂÊPER=2.22222e-03,ÎóÂëÂÊBER=1.24717e-05
LTÂë£¬µ±Ç°¿ªÏú=1.70,µ±Ç°Ö¡ÊýÎª1000, ÎóÖ¡ÂÊPER=2.50000e-02,ÎóÂëÂÊBER=2.45000e-05
RaptorÂë£¬µ±Ç°¿ªÏú=1.70,µ±Ç°Ö¡ÊýÎª1000, ÎóÖ¡ÂÊPER=2.00000e-03,ÎóÂëÂÊBER=1.12245e-05
LTÂë£¬µ±Ç°¿ªÏú=1.70,µ±Ç°Ö¡ÊýÎª1100, ÎóÖ¡ÂÊPER=2.45455e-02,ÎóÂëÂÊBER=2.31818e-05
RaptorÂë£¬µ±Ç°¿ªÏú=1.70,µ±Ç°Ö¡ÊýÎª1100, ÎóÖ¡ÂÊPER=1.81818e-03,ÎóÂëÂÊBER=1.02041e-05
LTÂë£¬µ±Ç°¿ªÏú=1.70,µ±Ç°Ö¡ÊýÎª1200, ÎóÖ¡ÂÊPER=2.58333e-02,ÎóÂëÂÊBER=2.29167e-05
RaptorÂë£¬µ±Ç°¿ªÏú=1.70,µ±Ç°Ö¡ÊýÎª1200, ÎóÖ¡ÂÊPER=1.66667e-03,ÎóÂëÂÊBER=9.35374e-06
LTÂë£¬µ±Ç°¿ªÏú=1.70,µ±Ç°Ö¡ÊýÎª1300, ÎóÖ¡ÂÊPER=2.76923e-02,ÎóÂëÂÊBER=2.30769e-05
RaptorÂë£¬µ±Ç°¿ªÏú=1.70,µ±Ç°Ö¡ÊýÎª1300, ÎóÖ¡ÂÊPER=1.53846e-03,ÎóÂëÂÊBER=8.63422e-06
LTÂë£¬µ±Ç°¿ªÏú=1.70,µ±Ç°Ö¡ÊýÎª1400, ÎóÖ¡ÂÊPER=2.71429e-02,ÎóÂëÂÊBER=2.21429e-05
RaptorÂë£¬µ±Ç°¿ªÏú=1.70,µ±Ç°Ö¡ÊýÎª1400, ÎóÖ¡ÂÊPER=1.42857e-03,ÎóÂëÂÊBER=8.01749e-06
LTÂë£¬µ±Ç°¿ªÏú=1.70,µ±Ç°Ö¡ÊýÎª1500, ÎóÖ¡ÂÊPER=2.60000e-02,ÎóÂëÂÊBER=2.10000e-05
RaptorÂë£¬µ±Ç°¿ªÏú=1.70,µ±Ç°Ö¡ÊýÎª1500, ÎóÖ¡ÂÊPER=1.33333e-03,ÎóÂëÂÊBER=7.48299e-06
LTÂë£¬µ±Ç°¿ªÏú=1.70,µ±Ç°Ö¡ÊýÎª1600, ÎóÖ¡ÂÊPER=2.43750e-02,ÎóÂëÂÊBER=1.96875e-05
RaptorÂë£¬µ±Ç°¿ªÏú=1.70,µ±Ç°Ö¡ÊýÎª1600, ÎóÖ¡ÂÊPER=1.25000e-03,ÎóÂëÂÊBER=7.01531e-06
LTÂë£¬µ±Ç°¿ªÏú=1.70,µ±Ç°Ö¡ÊýÎª1700, ÎóÖ¡ÂÊPER=2.52941e-02,ÎóÂëÂÊBER=1.97059e-05
RaptorÂë£¬µ±Ç°¿ªÏú=1.70,µ±Ç°Ö¡ÊýÎª1700, ÎóÖ¡ÂÊPER=1.17647e-03,ÎóÂëÂÊBER=6.60264e-06
LTÂë£¬µ±Ç°¿ªÏú=1.70,µ±Ç°Ö¡ÊýÎª1800, ÎóÖ¡ÂÊPER=2.55556e-02,ÎóÂëÂÊBER=1.94444e-05
RaptorÂë£¬µ±Ç°¿ªÏú=1.70,µ±Ç°Ö¡ÊýÎª1800, ÎóÖ¡ÂÊPER=1.11111e-03,ÎóÂëÂÊBER=6.23583e-06
LTÂë£¬µ±Ç°¿ªÏú=1.70,µ±Ç°Ö¡ÊýÎª1900, ÎóÖ¡ÂÊPER=2.42105e-02,ÎóÂëÂÊBER=1.84211e-05
RaptorÂë£¬µ±Ç°¿ªÏú=1.70,µ±Ç°Ö¡ÊýÎª1900, ÎóÖ¡ÂÊPER=1.05263e-03,ÎóÂëÂÊBER=5.90763e-06
LTÂë£¬µ±Ç°¿ªÏú=1.70,µ±Ç°Ö¡ÊýÎª2000, ÎóÖ¡ÂÊPER=2.60000e-02,ÎóÂëÂÊBER=2.07500e-05
RaptorÂë£¬µ±Ç°¿ªÏú=1.70,µ±Ç°Ö¡ÊýÎª2000, ÎóÖ¡ÂÊPER=1.50000e-03,ÎóÂëÂÊBER=9.43878e-06
LTÂë£¬µ±Ç°¿ªÏú=1.70,µ±Ç°Ö¡ÊýÎª2100, ÎóÖ¡ÂÊPER=2.57143e-02,ÎóÂëÂÊBER=2.02381e-05
RaptorÂë£¬µ±Ç°¿ªÏú=1.70,µ±Ç°Ö¡ÊýÎª2100, ÎóÖ¡ÂÊPER=1.42857e-03,ÎóÂëÂÊBER=8.98931e-06
LTÂë£¬µ±Ç°¿ªÏú=1.70,µ±Ç°Ö¡ÊýÎª2200, ÎóÖ¡ÂÊPER=2.54545e-02,ÎóÂëÂÊBER=1.97727e-05
RaptorÂë£¬µ±Ç°¿ªÏú=1.70,µ±Ç°Ö¡ÊýÎª2200, ÎóÖ¡ÂÊPER=1.36364e-03,ÎóÂëÂÊBER=8.58071e-06
LTÂë£¬µ±Ç°¿ªÏú=1.70,µ±Ç°Ö¡ÊýÎª2300, ÎóÖ¡ÂÊPER=2.43478e-02,ÎóÂëÂÊBER=1.89130e-05
RaptorÂë£¬µ±Ç°¿ªÏú=1.70,µ±Ç°Ö¡ÊýÎª2300, ÎóÖ¡ÂÊPER=1.30435e-03,ÎóÂëÂÊBER=8.20763e-06
LTÂë£¬µ±Ç°¿ªÏú=1.70,µ±Ç°Ö¡ÊýÎª2400, ÎóÖ¡ÂÊPER=2.41667e-02,ÎóÂëÂÊBER=1.85417e-05
RaptorÂë£¬µ±Ç°¿ªÏú=1.70,µ±Ç°Ö¡ÊýÎª2400, ÎóÖ¡ÂÊPER=1.25000e-03,ÎóÂëÂÊBER=7.86565e-06
LTÂë£¬µ±Ç°¿ªÏú=1.70,µ±Ç°Ö¡ÊýÎª2500, ÎóÖ¡ÂÊPER=2.48000e-02,ÎóÂëÂÊBER=2.20000e-05
RaptorÂë£¬µ±Ç°¿ªÏú=1.70,µ±Ç°Ö¡ÊýÎª2500, ÎóÖ¡ÂÊPER=1.20000e-03,ÎóÂëÂÊBER=7.55102e-06
LTÂë£¬µ±Ç°¿ªÏú=1.70,µ±Ç°Ö¡ÊýÎª2600, ÎóÖ¡ÂÊPER=2.42308e-02,ÎóÂëÂÊBER=2.13462e-05
RaptorÂë£¬µ±Ç°¿ªÏú=1.70,µ±Ç°Ö¡ÊýÎª2600, ÎóÖ¡ÂÊPER=1.15385e-03,ÎóÂëÂÊBER=7.26060e-06
LTÂë£¬µ±Ç°¿ªÏú=1.70,µ±Ç°Ö¡ÊýÎª2700, ÎóÖ¡ÂÊPER=2.44444e-02,ÎóÂëÂÊBER=2.14815e-05
RaptorÂë£¬µ±Ç°¿ªÏú=1.70,µ±Ç°Ö¡ÊýÎª2700, ÎóÖ¡ÂÊPER=1.11111e-03,ÎóÂëÂÊBER=6.99169e-06
LTÂë£¬µ±Ç°¿ªÏú=1.70,µ±Ç°Ö¡ÊýÎª2800, ÎóÖ¡ÂÊPER=2.53571e-02,ÎóÂëÂÊBER=2.16071e-05
RaptorÂë£¬µ±Ç°¿ªÏú=1.70,µ±Ç°Ö¡ÊýÎª2800, ÎóÖ¡ÂÊPER=1.07143e-03,ÎóÂëÂÊBER=6.74198e-06
LTÂë£¬µ±Ç°¿ªÏú=1.70,µ±Ç°Ö¡ÊýÎª2900, ÎóÖ¡ÂÊPER=2.51724e-02,ÎóÂëÂÊBER=2.12069e-05
RaptorÂë£¬µ±Ç°¿ªÏú=1.70,µ±Ç°Ö¡ÊýÎª2900, ÎóÖ¡ÂÊPER=1.03448e-03,ÎóÂëÂÊBER=6.50950e-06
LTÂë£¬µ±Ç°¿ªÏú=1.70,µ±Ç°Ö¡ÊýÎª3000, ÎóÖ¡ÂÊPER=2.56667e-02,ÎóÂëÂÊBER=2.13333e-05
RaptorÂë£¬µ±Ç°¿ªÏú=1.70,µ±Ç°Ö¡ÊýÎª3000, ÎóÖ¡ÂÊPER=1.00000e-03,ÎóÂëÂÊBER=6.29252e-06
LTÂë£¬µ±Ç°¿ªÏú=1.70,µ±Ç°Ö¡ÊýÎª3100, ÎóÖ¡ÂÊPER=2.54839e-02,ÎóÂëÂÊBER=2.19355e-05
RaptorÂë£¬µ±Ç°¿ªÏú=1.70,µ±Ç°Ö¡ÊýÎª3100, ÎóÖ¡ÂÊPER=1.29032e-03,ÎóÂëÂÊBER=8.06452e-06
LTÂë£¬µ±Ç°¿ªÏú=1.70,µ±Ç°Ö¡ÊýÎª3200, ÎóÖ¡ÂÊPER=2.56250e-02,ÎóÂëÂÊBER=2.17187e-05
RaptorÂë£¬µ±Ç°¿ªÏú=1.70,µ±Ç°Ö¡ÊýÎª3200, ÎóÖ¡ÂÊPER=1.25000e-03,ÎóÂëÂÊBER=7.81250e-06
LTÂë£¬µ±Ç°¿ªÏú=1.70,µ±Ç°Ö¡ÊýÎª3300, ÎóÖ¡ÂÊPER=2.54545e-02,ÎóÂëÂÊBER=2.16667e-05
RaptorÂë£¬µ±Ç°¿ªÏú=1.70,µ±Ç°Ö¡ÊýÎª3300, ÎóÖ¡ÂÊPER=1.21212e-03,ÎóÂëÂÊBER=7.57576e-06
LTÂë£¬µ±Ç°¿ªÏú=1.70,µ±Ç°Ö¡ÊýÎª3400, ÎóÖ¡ÂÊPER=2.50000e-02,ÎóÂëÂÊBER=2.11765e-05
RaptorÂë£¬µ±Ç°¿ªÏú=1.70,µ±Ç°Ö¡ÊýÎª3400, ÎóÖ¡ÂÊPER=1.17647e-03,ÎóÂëÂÊBER=7.35294e-06
LTÂë£¬µ±Ç°¿ªÏú=1.70,µ±Ç°Ö¡ÊýÎª3500, ÎóÖ¡ÂÊPER=2.54286e-02,ÎóÂëÂÊBER=2.11429e-05
RaptorÂë£¬µ±Ç°¿ªÏú=1.70,µ±Ç°Ö¡ÊýÎª3500, ÎóÖ¡ÂÊPER=1.14286e-03,ÎóÂëÂÊBER=7.14286e-06
LTÂë£¬µ±Ç°¿ªÏú=1.70,µ±Ç°Ö¡ÊýÎª3600, ÎóÖ¡ÂÊPER=2.58333e-02,ÎóÂëÂÊBER=2.11111e-05
RaptorÂë£¬µ±Ç°¿ªÏú=1.70,µ±Ç°Ö¡ÊýÎª3600, ÎóÖ¡ÂÊPER=1.11111e-03,ÎóÂëÂÊBER=6.94444e-06
LTÂë£¬µ±Ç°¿ªÏú=1.70,µ±Ç°Ö¡ÊýÎª3700, ÎóÖ¡ÂÊPER=2.56757e-02,ÎóÂëÂÊBER=2.08108e-05
RaptorÂë£¬µ±Ç°¿ªÏú=1.70,µ±Ç°Ö¡ÊýÎª3700, ÎóÖ¡ÂÊPER=1.08108e-03,ÎóÂëÂÊBER=6.75676e-06
LTÂë£¬µ±Ç°¿ªÏú=1.70,µ±Ç°Ö¡ÊýÎª3800, ÎóÖ¡ÂÊPER=2.55263e-02,ÎóÂëÂÊBER=2.05263e-05
RaptorÂë£¬µ±Ç°¿ªÏú=1.70,µ±Ç°Ö¡ÊýÎª3800, ÎóÖ¡ÂÊPER=1.05263e-03,ÎóÂëÂÊBER=6.57895e-06
LTÂë£¬µ±Ç°¿ªÏú=1.70,µ±Ç°Ö¡ÊýÎª3900, ÎóÖ¡ÂÊPER=2.56410e-02,ÎóÂëÂÊBER=2.03846e-05
RaptorÂë£¬µ±Ç°¿ªÏú=1.70,µ±Ç°Ö¡ÊýÎª3900, ÎóÖ¡ÂÊPER=1.02564e-03,ÎóÂëÂÊBER=6.41026e-06
LTÂë£¬µ±Ç°¿ªÏú=1.70,µ±Ç°Ö¡ÊýÎª4000, ÎóÖ¡ÂÊPER=2.55000e-02,ÎóÂëÂÊBER=2.01250e-05
RaptorÂë£¬µ±Ç°¿ªÏú=1.70,µ±Ç°Ö¡ÊýÎª4000, ÎóÖ¡ÂÊPER=1.00000e-03,ÎóÂëÂÊBER=6.25000e-06
LTÂë£¬µ±Ç°¿ªÏú=1.70,µ±Ç°Ö¡ÊýÎª4100, ÎóÖ¡ÂÊPER=2.53659e-02,ÎóÂëÂÊBER=1.98780e-05
RaptorÂë£¬µ±Ç°¿ªÏú=1.70,µ±Ç°Ö¡ÊýÎª4100, ÎóÖ¡ÂÊPER=9.75610e-04,ÎóÂëÂÊBER=6.09756e-06
LTÂë£¬µ±Ç°¿ªÏú=1.70,µ±Ç°Ö¡ÊýÎª4200, ÎóÖ¡ÂÊPER=2.47619e-02,ÎóÂëÂÊBER=1.94048e-05
RaptorÂë£¬µ±Ç°¿ªÏú=1.70,µ±Ç°Ö¡ÊýÎª4200, ÎóÖ¡ÂÊPER=9.52381e-04,ÎóÂëÂÊBER=5.95238e-06
LTÂë£¬µ±Ç°¿ªÏú=1.70,µ±Ç°Ö¡ÊýÎª4300, ÎóÖ¡ÂÊPER=2.55814e-02,ÎóÂëÂÊBER=2.15116e-05
RaptorÂë£¬µ±Ç°¿ªÏú=1.70,µ±Ç°Ö¡ÊýÎª4300, ÎóÖ¡ÂÊPER=1.16279e-03,ÎóÂëÂÊBER=7.35643e-06
LTÂë£¬µ±Ç°¿ªÏú=1.70,µ±Ç°Ö¡ÊýÎª4400, ÎóÖ¡ÂÊPER=2.52273e-02,ÎóÂëÂÊBER=2.11364e-05
RaptorÂë£¬µ±Ç°¿ªÏú=1.70,µ±Ç°Ö¡ÊýÎª4400, ÎóÖ¡ÂÊPER=1.13636e-03,ÎóÂëÂÊBER=7.18924e-06
LTÂë£¬µ±Ç°¿ªÏú=1.70,µ±Ç°Ö¡ÊýÎª4500, ÎóÖ¡ÂÊPER=2.53333e-02,ÎóÂëÂÊBER=2.10000e-05
RaptorÂë£¬µ±Ç°¿ªÏú=1.70,µ±Ç°Ö¡ÊýÎª4500, ÎóÖ¡ÂÊPER=1.11111e-03,ÎóÂëÂÊBER=7.02948e-06
LTÂë£¬µ±Ç°¿ªÏú=1.70,µ±Ç°Ö¡ÊýÎª4600, ÎóÖ¡ÂÊPER=2.50000e-02,ÎóÂëÂÊBER=2.06522e-05
RaptorÂë£¬µ±Ç°¿ªÏú=1.70,µ±Ç°Ö¡ÊýÎª4600, ÎóÖ¡ÂÊPER=1.08696e-03,ÎóÂëÂÊBER=6.87666e-06
LTÂë£¬µ±Ç°¿ªÏú=1.70,µ±Ç°Ö¡ÊýÎª4700, ÎóÖ¡ÂÊPER=2.44681e-02,ÎóÂëÂÊBER=2.02128e-05
RaptorÂë£¬µ±Ç°¿ªÏú=1.70,µ±Ç°Ö¡ÊýÎª4700, ÎóÖ¡ÂÊPER=1.06383e-03,ÎóÂëÂÊBER=6.73035e-06
LTÂë£¬µ±Ç°¿ªÏú=1.70,µ±Ç°Ö¡ÊýÎª4800, ÎóÖ¡ÂÊPER=2.43750e-02,ÎóÂëÂÊBER=2.07292e-05
RaptorÂë£¬µ±Ç°¿ªÏú=1.70,µ±Ç°Ö¡ÊýÎª4800, ÎóÖ¡ÂÊPER=1.25000e-03,ÎóÂëÂÊBER=7.33418e-06
´íÎó±ÈÌØÊýºÍÖ¡Êý¶¼´ïµ½Ò»¶¨Á¿£¬ÐèÒªÔö¼Ó¿ªÏú
µ±Ç°ÐÅµÀ±ê×¼²î=100.00,¿ªÏú=1.70,µ±Ç°Ö¡ÊýÎª4872, LTÂëÎóÂëÂÊBER_LT=2.05255e-05,RaptorÎóÂëÂÊBER=7.22580e-06
LTÂë£¬µ±Ç°¿ªÏú=1.80,µ±Ç°Ö¡ÊýÎª100, ÎóÖ¡ÂÊPER=1.00000e-02,ÎóÂëÂÊBER=1.00000e-05
RaptorÂë£¬µ±Ç°¿ªÏú=1.80,µ±Ç°Ö¡ÊýÎª100, ÎóÖ¡ÂÊPER=0.00000e+00,ÎóÂëÂÊBER=0.00000e+00
LTÂë£¬µ±Ç°¿ªÏú=1.80,µ±Ç°Ö¡ÊýÎª200, ÎóÖ¡ÂÊPER=5.00000e-03,ÎóÂëÂÊBER=5.00000e-06
RaptorÂë£¬µ±Ç°¿ªÏú=1.80,µ±Ç°Ö¡ÊýÎª200, ÎóÖ¡ÂÊPER=0.00000e+00,ÎóÂëÂÊBER=0.00000e+00
LTÂë£¬µ±Ç°¿ªÏú=1.80,µ±Ç°Ö¡ÊýÎª300, ÎóÖ¡ÂÊPER=6.66667e-03,ÎóÂëÂÊBER=6.66667e-06
RaptorÂë£¬µ±Ç°¿ªÏú=1.80,µ±Ç°Ö¡ÊýÎª300, ÎóÖ¡ÂÊPER=0.00000e+00,ÎóÂëÂÊBER=0.00000e+00
LTÂë£¬µ±Ç°¿ªÏú=1.80,µ±Ç°Ö¡ÊýÎª400, ÎóÖ¡ÂÊPER=7.50000e-03,ÎóÂëÂÊBER=6.25000e-06
RaptorÂë£¬µ±Ç°¿ªÏú=1.80,µ±Ç°Ö¡ÊýÎª400, ÎóÖ¡ÂÊPER=0.00000e+00,ÎóÂëÂÊBER=0.00000e+00
LTÂë£¬µ±Ç°¿ªÏú=1.80,µ±Ç°Ö¡ÊýÎª500, ÎóÖ¡ÂÊPER=8.00000e-03,ÎóÂëÂÊBER=6.00000e-06
RaptorÂë£¬µ±Ç°¿ªÏú=1.80,µ±Ç°Ö¡ÊýÎª500, ÎóÖ¡ÂÊPER=0.00000e+00,ÎóÂëÂÊBER=0.00000e+00
LTÂë£¬µ±Ç°¿ªÏú=1.80,µ±Ç°Ö¡ÊýÎª600, ÎóÖ¡ÂÊPER=8.33333e-03,ÎóÂëÂÊBER=5.83333e-06
RaptorÂë£¬µ±Ç°¿ªÏú=1.80,µ±Ç°Ö¡ÊýÎª600, ÎóÖ¡ÂÊPER=0.00000e+00,ÎóÂëÂÊBER=0.00000e+00
LTÂë£¬µ±Ç°¿ªÏú=1.80,µ±Ç°Ö¡ÊýÎª700, ÎóÖ¡ÂÊPER=7.14286e-03,ÎóÂëÂÊBER=5.00000e-06
RaptorÂë£¬µ±Ç°¿ªÏú=1.80,µ±Ç°Ö¡ÊýÎª700, ÎóÖ¡ÂÊPER=0.00000e+00,ÎóÂëÂÊBER=0.00000e+00
LTÂë£¬µ±Ç°¿ªÏú=1.80,µ±Ç°Ö¡ÊýÎª800, ÎóÖ¡ÂÊPER=8.75000e-03,ÎóÂëÂÊBER=5.62500e-06
RaptorÂë£¬µ±Ç°¿ªÏú=1.80,µ±Ç°Ö¡ÊýÎª800, ÎóÖ¡ÂÊPER=0.00000e+00,ÎóÂëÂÊBER=0.00000e+00
LTÂë£¬µ±Ç°¿ªÏú=1.80,µ±Ç°Ö¡ÊýÎª900, ÎóÖ¡ÂÊPER=8.88889e-03,ÎóÂëÂÊBER=5.55556e-06
RaptorÂë£¬µ±Ç°¿ªÏú=1.80,µ±Ç°Ö¡ÊýÎª900, ÎóÖ¡ÂÊPER=0.00000e+00,ÎóÂëÂÊBER=0.00000e+00
LTÂë£¬µ±Ç°¿ªÏú=1.80,µ±Ç°Ö¡ÊýÎª1000, ÎóÖ¡ÂÊPER=8.00000e-03,ÎóÂëÂÊBER=5.00000e-06
RaptorÂë£¬µ±Ç°¿ªÏú=1.80,µ±Ç°Ö¡ÊýÎª1000, ÎóÖ¡ÂÊPER=0.00000e+00,ÎóÂëÂÊBER=0.00000e+00
LTÂë£¬µ±Ç°¿ªÏú=1.80,µ±Ç°Ö¡ÊýÎª1100, ÎóÖ¡ÂÊPER=8.18182e-03,ÎóÂëÂÊBER=5.00000e-06
RaptorÂë£¬µ±Ç°¿ªÏú=1.80,µ±Ç°Ö¡ÊýÎª1100, ÎóÖ¡ÂÊPER=0.00000e+00,ÎóÂëÂÊBER=0.00000e+00
LTÂë£¬µ±Ç°¿ªÏú=1.80,µ±Ç°Ö¡ÊýÎª1200, ÎóÖ¡ÂÊPER=1.08333e-02,ÎóÂëÂÊBER=6.25000e-06
RaptorÂë£¬µ±Ç°¿ªÏú=1.80,µ±Ç°Ö¡ÊýÎª1200, ÎóÖ¡ÂÊPER=0.00000e+00,ÎóÂëÂÊBER=0.00000e+00
LTÂë£¬µ±Ç°¿ªÏú=1.80,µ±Ç°Ö¡ÊýÎª1300, ÎóÖ¡ÂÊPER=1.15385e-02,ÎóÂëÂÊBER=6.53846e-06
RaptorÂë£¬µ±Ç°¿ªÏú=1.80,µ±Ç°Ö¡ÊýÎª1300, ÎóÖ¡ÂÊPER=0.00000e+00,ÎóÂëÂÊBER=0.00000e+00
LTÂë£¬µ±Ç°¿ªÏú=1.80,µ±Ç°Ö¡ÊýÎª1400, ÎóÖ¡ÂÊPER=1.28571e-02,ÎóÂëÂÊBER=7.14286e-06
RaptorÂë£¬µ±Ç°¿ªÏú=1.80,µ±Ç°Ö¡ÊýÎª1400, ÎóÖ¡ÂÊPER=0.00000e+00,ÎóÂëÂÊBER=0.00000e+00
LTÂë£¬µ±Ç°¿ªÏú=1.80,µ±Ç°Ö¡ÊýÎª1500, ÎóÖ¡ÂÊPER=1.40000e-02,ÎóÂëÂÊBER=7.66667e-06
RaptorÂë£¬µ±Ç°¿ªÏú=1.80,µ±Ç°Ö¡ÊýÎª1500, ÎóÖ¡ÂÊPER=0.00000e+00,ÎóÂëÂÊBER=0.00000e+00
LTÂë£¬µ±Ç°¿ªÏú=1.80,µ±Ç°Ö¡ÊýÎª1600, ÎóÖ¡ÂÊPER=1.31250e-02,ÎóÂëÂÊBER=7.18750e-06
RaptorÂë£¬µ±Ç°¿ªÏú=1.80,µ±Ç°Ö¡ÊýÎª1600, ÎóÖ¡ÂÊPER=0.00000e+00,ÎóÂëÂÊBER=0.00000e+00
LTÂë£¬µ±Ç°¿ªÏú=1.80,µ±Ç°Ö¡ÊýÎª1700, ÎóÖ¡ÂÊPER=1.23529e-02,ÎóÂëÂÊBER=6.76471e-06
RaptorÂë£¬µ±Ç°¿ªÏú=1.80,µ±Ç°Ö¡ÊýÎª1700, ÎóÖ¡ÂÊPER=0.00000e+00,ÎóÂëÂÊBER=0.00000e+00
LTÂë£¬µ±Ç°¿ªÏú=1.80,µ±Ç°Ö¡ÊýÎª1800, ÎóÖ¡ÂÊPER=1.22222e-02,ÎóÂëÂÊBER=6.66667e-06
RaptorÂë£¬µ±Ç°¿ªÏú=1.80,µ±Ç°Ö¡ÊýÎª1800, ÎóÖ¡ÂÊPER=0.00000e+00,ÎóÂëÂÊBER=0.00000e+00
LTÂë£¬µ±Ç°¿ªÏú=1.80,µ±Ç°Ö¡ÊýÎª1900, ÎóÖ¡ÂÊPER=1.15789e-02,ÎóÂëÂÊBER=6.31579e-06
RaptorÂë£¬µ±Ç°¿ªÏú=1.80,µ±Ç°Ö¡ÊýÎª1900, ÎóÖ¡ÂÊPER=0.00000e+00,ÎóÂëÂÊBER=0.00000e+00
LTÂë£¬µ±Ç°¿ªÏú=1.80,µ±Ç°Ö¡ÊýÎª2000, ÎóÖ¡ÂÊPER=1.20000e-02,ÎóÂëÂÊBER=6.50000e-06
RaptorÂë£¬µ±Ç°¿ªÏú=1.80,µ±Ç°Ö¡ÊýÎª2000, ÎóÖ¡ÂÊPER=0.00000e+00,ÎóÂëÂÊBER=0.00000e+00
LTÂë£¬µ±Ç°¿ªÏú=1.80,µ±Ç°Ö¡ÊýÎª2100, ÎóÖ¡ÂÊPER=1.14286e-02,ÎóÂëÂÊBER=6.19048e-06
RaptorÂë£¬µ±Ç°¿ªÏú=1.80,µ±Ç°Ö¡ÊýÎª2100, ÎóÖ¡ÂÊPER=0.00000e+00,ÎóÂëÂÊBER=0.00000e+00
LTÂë£¬µ±Ç°¿ªÏú=1.80,µ±Ç°Ö¡ÊýÎª2200, ÎóÖ¡ÂÊPER=1.13636e-02,ÎóÂëÂÊBER=6.13636e-06
RaptorÂë£¬µ±Ç°¿ªÏú=1.80,µ±Ç°Ö¡ÊýÎª2200, ÎóÖ¡ÂÊPER=0.00000e+00,ÎóÂëÂÊBER=0.00000e+00
LTÂë£¬µ±Ç°¿ªÏú=1.80,µ±Ç°Ö¡ÊýÎª2300, ÎóÖ¡ÂÊPER=1.13043e-02,ÎóÂëÂÊBER=6.08696e-06
RaptorÂë£¬µ±Ç°¿ªÏú=1.80,µ±Ç°Ö¡ÊýÎª2300, ÎóÖ¡ÂÊPER=0.00000e+00,ÎóÂëÂÊBER=0.00000e+00
LTÂë£¬µ±Ç°¿ªÏú=1.80,µ±Ç°Ö¡ÊýÎª2400, ÎóÖ¡ÂÊPER=1.08333e-02,ÎóÂëÂÊBER=5.83333e-06
RaptorÂë£¬µ±Ç°¿ªÏú=1.80,µ±Ç°Ö¡ÊýÎª2400, ÎóÖ¡ÂÊPER=0.00000e+00,ÎóÂëÂÊBER=0.00000e+00
LTÂë£¬µ±Ç°¿ªÏú=1.80,µ±Ç°Ö¡ÊýÎª2500, ÎóÖ¡ÂÊPER=1.04000e-02,ÎóÂëÂÊBER=5.60000e-06
RaptorÂë£¬µ±Ç°¿ªÏú=1.80,µ±Ç°Ö¡ÊýÎª2500, ÎóÖ¡ÂÊPER=0.00000e+00,ÎóÂëÂÊBER=0.00000e+00
LTÂë£¬µ±Ç°¿ªÏú=1.80,µ±Ç°Ö¡ÊýÎª2600, ÎóÖ¡ÂÊPER=1.03846e-02,ÎóÂëÂÊBER=5.76923e-06
RaptorÂë£¬µ±Ç°¿ªÏú=1.80,µ±Ç°Ö¡ÊýÎª2600, ÎóÖ¡ÂÊPER=0.00000e+00,ÎóÂëÂÊBER=0.00000e+00
LTÂë£¬µ±Ç°¿ªÏú=1.80,µ±Ç°Ö¡ÊýÎª2700, ÎóÖ¡ÂÊPER=1.03704e-02,ÎóÂëÂÊBER=5.74074e-06
RaptorÂë£¬µ±Ç°¿ªÏú=1.80,µ±Ç°Ö¡ÊýÎª2700, ÎóÖ¡ÂÊPER=0.00000e+00,ÎóÂëÂÊBER=0.00000e+00
LTÂë£¬µ±Ç°¿ªÏú=1.80,µ±Ç°Ö¡ÊýÎª2800, ÎóÖ¡ÂÊPER=1.07143e-02,ÎóÂëÂÊBER=5.89286e-06
RaptorÂë£¬µ±Ç°¿ªÏú=1.80,µ±Ç°Ö¡ÊýÎª2800, ÎóÖ¡ÂÊPER=0.00000e+00,ÎóÂëÂÊBER=0.00000e+00
LTÂë£¬µ±Ç°¿ªÏú=1.80,µ±Ç°Ö¡ÊýÎª2900, ÎóÖ¡ÂÊPER=1.10345e-02,ÎóÂëÂÊBER=6.55172e-06
RaptorÂë£¬µ±Ç°¿ªÏú=1.80,µ±Ç°Ö¡ÊýÎª2900, ÎóÖ¡ÂÊPER=0.00000e+00,ÎóÂëÂÊBER=0.00000e+00
LTÂë£¬µ±Ç°¿ªÏú=1.80,µ±Ç°Ö¡ÊýÎª3000, ÎóÖ¡ÂÊPER=1.06667e-02,ÎóÂëÂÊBER=6.33333e-06
RaptorÂë£¬µ±Ç°¿ªÏú=1.80,µ±Ç°Ö¡ÊýÎª3000, ÎóÖ¡ÂÊPER=0.00000e+00,ÎóÂëÂÊBER=0.00000e+00
LTÂë£¬µ±Ç°¿ªÏú=1.80,µ±Ç°Ö¡ÊýÎª3100, ÎóÖ¡ÂÊPER=1.12903e-02,ÎóÂëÂÊBER=6.61290e-06
RaptorÂë£¬µ±Ç°¿ªÏú=1.80,µ±Ç°Ö¡ÊýÎª3100, ÎóÖ¡ÂÊPER=0.00000e+00,ÎóÂëÂÊBER=0.00000e+00
LTÂë£¬µ±Ç°¿ªÏú=1.80,µ±Ç°Ö¡ÊýÎª3200, ÎóÖ¡ÂÊPER=1.09375e-02,ÎóÂëÂÊBER=6.40625e-06
RaptorÂë£¬µ±Ç°¿ªÏú=1.80,µ±Ç°Ö¡ÊýÎª3200, ÎóÖ¡ÂÊPER=0.00000e+00,ÎóÂëÂÊBER=0.00000e+00
LTÂë£¬µ±Ç°¿ªÏú=1.80,µ±Ç°Ö¡ÊýÎª3300, ÎóÖ¡ÂÊPER=1.12121e-02,ÎóÂëÂÊBER=8.48485e-06
RaptorÂë£¬µ±Ç°¿ªÏú=1.80,µ±Ç°Ö¡ÊýÎª3300, ÎóÖ¡ÂÊPER=3.03030e-04,ÎóÂëÂÊBER=2.16450e-06
LTÂë£¬µ±Ç°¿ªÏú=1.80,µ±Ç°Ö¡ÊýÎª3400, ÎóÖ¡ÂÊPER=1.11765e-02,ÎóÂëÂÊBER=8.38235e-06
RaptorÂë£¬µ±Ç°¿ªÏú=1.80,µ±Ç°Ö¡ÊýÎª3400, ÎóÖ¡ÂÊPER=2.94118e-04,ÎóÂëÂÊBER=2.10084e-06
LTÂë£¬µ±Ç°¿ªÏú=1.80,µ±Ç°Ö¡ÊýÎª3500, ÎóÖ¡ÂÊPER=1.08571e-02,ÎóÂëÂÊBER=8.14286e-06
RaptorÂë£¬µ±Ç°¿ªÏú=1.80,µ±Ç°Ö¡ÊýÎª3500, ÎóÖ¡ÂÊPER=2.85714e-04,ÎóÂëÂÊBER=2.04082e-06
LTÂë£¬µ±Ç°¿ªÏú=1.80,µ±Ç°Ö¡ÊýÎª3600, ÎóÖ¡ÂÊPER=1.13889e-02,ÎóÂëÂÊBER=8.47222e-06
RaptorÂë£¬µ±Ç°¿ªÏú=1.80,µ±Ç°Ö¡ÊýÎª3600, ÎóÖ¡ÂÊPER=2.77778e-04,ÎóÂëÂÊBER=1.98413e-06
LTÂë£¬µ±Ç°¿ªÏú=1.80,µ±Ç°Ö¡ÊýÎª3700, ÎóÖ¡ÂÊPER=1.10811e-02,ÎóÂëÂÊBER=8.24324e-06
RaptorÂë£¬µ±Ç°¿ªÏú=1.80,µ±Ç°Ö¡ÊýÎª3700, ÎóÖ¡ÂÊPER=2.70270e-04,ÎóÂëÂÊBER=1.93050e-06
LTÂë£¬µ±Ç°¿ªÏú=1.80,µ±Ç°Ö¡ÊýÎª3800, ÎóÖ¡ÂÊPER=1.13158e-02,ÎóÂëÂÊBER=8.28947e-06
RaptorÂë£¬µ±Ç°¿ªÏú=1.80,µ±Ç°Ö¡ÊýÎª3800, ÎóÖ¡ÂÊPER=2.63158e-04,ÎóÂëÂÊBER=1.87970e-06
LTÂë£¬µ±Ç°¿ªÏú=1.80,µ±Ç°Ö¡ÊýÎª3900, ÎóÖ¡ÂÊPER=1.12821e-02,ÎóÂëÂÊBER=8.33333e-06
RaptorÂë£¬µ±Ç°¿ªÏú=1.80,µ±Ç°Ö¡ÊýÎª3900, ÎóÖ¡ÂÊPER=2.56410e-04,ÎóÂëÂÊBER=1.83150e-06
LTÂë£¬µ±Ç°¿ªÏú=1.80,µ±Ç°Ö¡ÊýÎª4000, ÎóÖ¡ÂÊPER=1.15000e-02,ÎóÂëÂÊBER=8.62500e-06
RaptorÂë£¬µ±Ç°¿ªÏú=1.80,µ±Ç°Ö¡ÊýÎª4000, ÎóÖ¡ÂÊPER=2.50000e-04,ÎóÂëÂÊBER=1.78571e-06
LTÂë£¬µ±Ç°¿ªÏú=1.80,µ±Ç°Ö¡ÊýÎª4100, ÎóÖ¡ÂÊPER=1.19512e-02,ÎóÂëÂÊBER=8.90244e-06
RaptorÂë£¬µ±Ç°¿ªÏú=1.80,µ±Ç°Ö¡ÊýÎª4100, ÎóÖ¡ÂÊPER=2.43902e-04,ÎóÂëÂÊBER=1.74216e-06
LTÂë£¬µ±Ç°¿ªÏú=1.80,µ±Ç°Ö¡ÊýÎª4200, ÎóÖ¡ÂÊPER=1.16667e-02,ÎóÂëÂÊBER=8.69048e-06
RaptorÂë£¬µ±Ç°¿ªÏú=1.80,µ±Ç°Ö¡ÊýÎª4200, ÎóÖ¡ÂÊPER=2.38095e-04,ÎóÂëÂÊBER=1.70068e-06
LTÂë£¬µ±Ç°¿ªÏú=1.80,µ±Ç°Ö¡ÊýÎª4300, ÎóÖ¡ÂÊPER=1.23256e-02,ÎóÂëÂÊBER=9.18605e-06
RaptorÂë£¬µ±Ç°¿ªÏú=1.80,µ±Ç°Ö¡ÊýÎª4300, ÎóÖ¡ÂÊPER=2.32558e-04,ÎóÂëÂÊBER=1.66113e-06
LTÂë£¬µ±Ç°¿ªÏú=1.80,µ±Ç°Ö¡ÊýÎª4400, ÎóÖ¡ÂÊPER=1.25000e-02,ÎóÂëÂÊBER=9.20455e-06
RaptorÂë£¬µ±Ç°¿ªÏú=1.80,µ±Ç°Ö¡ÊýÎª4400, ÎóÖ¡ÂÊPER=2.27273e-04,ÎóÂëÂÊBER=1.62338e-06
LTÂë£¬µ±Ç°¿ªÏú=1.80,µ±Ç°Ö¡ÊýÎª4500, ÎóÖ¡ÂÊPER=1.26667e-02,ÎóÂëÂÊBER=9.22222e-06
RaptorÂë£¬µ±Ç°¿ªÏú=1.80,µ±Ç°Ö¡ÊýÎª4500, ÎóÖ¡ÂÊPER=2.22222e-04,ÎóÂëÂÊBER=1.58730e-06
LTÂë£¬µ±Ç°¿ªÏú=1.80,µ±Ç°Ö¡ÊýÎª4600, ÎóÖ¡ÂÊPER=1.23913e-02,ÎóÂëÂÊBER=9.02174e-06
RaptorÂë£¬µ±Ç°¿ªÏú=1.80,µ±Ç°Ö¡ÊýÎª4600, ÎóÖ¡ÂÊPER=2.17391e-04,ÎóÂëÂÊBER=1.55280e-06
LTÂë£¬µ±Ç°¿ªÏú=1.80,µ±Ç°Ö¡ÊýÎª4700, ÎóÖ¡ÂÊPER=1.25532e-02,ÎóÂëÂÊBER=9.14894e-06
RaptorÂë£¬µ±Ç°¿ªÏú=1.80,µ±Ç°Ö¡ÊýÎª4700, ÎóÖ¡ÂÊPER=2.12766e-04,ÎóÂëÂÊBER=1.51976e-06
LTÂë£¬µ±Ç°¿ªÏú=1.80,µ±Ç°Ö¡ÊýÎª4800, ÎóÖ¡ÂÊPER=1.25000e-02,ÎóÂëÂÊBER=9.06250e-06
RaptorÂë£¬µ±Ç°¿ªÏú=1.80,µ±Ç°Ö¡ÊýÎª4800, ÎóÖ¡ÂÊPER=2.08333e-04,ÎóÂëÂÊBER=1.48810e-06
LTÂë£¬µ±Ç°¿ªÏú=1.80,µ±Ç°Ö¡ÊýÎª4900, ÎóÖ¡ÂÊPER=1.24490e-02,ÎóÂëÂÊBER=8.97959e-06
RaptorÂë£¬µ±Ç°¿ªÏú=1.80,µ±Ç°Ö¡ÊýÎª4900, ÎóÖ¡ÂÊPER=2.04082e-04,ÎóÂëÂÊBER=1.45773e-06
LTÂë£¬µ±Ç°¿ªÏú=1.80,µ±Ç°Ö¡ÊýÎª5000, ÎóÖ¡ÂÊPER=1.24000e-02,ÎóÂëÂÊBER=9.00000e-06
RaptorÂë£¬µ±Ç°¿ªÏú=1.80,µ±Ç°Ö¡ÊýÎª5000, ÎóÖ¡ÂÊPER=2.00000e-04,ÎóÂëÂÊBER=1.42857e-06
µ±Ç°ÐÅµÀ±ê×¼²î=100.00,¿ªÏú=1.80,µ±Ç°Ö¡ÊýÎª5000, LTÂëÎóÂëÂÊBER_LT=9.00000e-06,RaptorÎóÂëÂÊBER=1.42857e-06
LTÂë£¬µ±Ç°¿ªÏú=1.90,µ±Ç°Ö¡ÊýÎª100, ÎóÖ¡ÂÊPER=0.00000e+00,ÎóÂëÂÊBER=0.00000e+00
RaptorÂë£¬µ±Ç°¿ªÏú=1.90,µ±Ç°Ö¡ÊýÎª100, ÎóÖ¡ÂÊPER=0.00000e+00,ÎóÂëÂÊBER=0.00000e+00
LTÂë£¬µ±Ç°¿ªÏú=1.90,µ±Ç°Ö¡ÊýÎª200, ÎóÖ¡ÂÊPER=0.00000e+00,ÎóÂëÂÊBER=0.00000e+00
RaptorÂë£¬µ±Ç°¿ªÏú=1.90,µ±Ç°Ö¡ÊýÎª200, ÎóÖ¡ÂÊPER=0.00000e+00,ÎóÂëÂÊBER=0.00000e+00
LTÂë£¬µ±Ç°¿ªÏú=1.90,µ±Ç°Ö¡ÊýÎª300, ÎóÖ¡ÂÊPER=0.00000e+00,ÎóÂëÂÊBER=0.00000e+00
RaptorÂë£¬µ±Ç°¿ªÏú=1.90,µ±Ç°Ö¡ÊýÎª300, ÎóÖ¡ÂÊPER=0.00000e+00,ÎóÂëÂÊBER=0.00000e+00
LTÂë£¬µ±Ç°¿ªÏú=1.90,µ±Ç°Ö¡ÊýÎª400, ÎóÖ¡ÂÊPER=0.00000e+00,ÎóÂëÂÊBER=0.00000e+00
RaptorÂë£¬µ±Ç°¿ªÏú=1.90,µ±Ç°Ö¡ÊýÎª400, ÎóÖ¡ÂÊPER=0.00000e+00,ÎóÂëÂÊBER=0.00000e+00
LTÂë£¬µ±Ç°¿ªÏú=1.90,µ±Ç°Ö¡ÊýÎª500, ÎóÖ¡ÂÊPER=0.00000e+00,ÎóÂëÂÊBER=0.00000e+00
RaptorÂë£¬µ±Ç°¿ªÏú=1.90,µ±Ç°Ö¡ÊýÎª500, ÎóÖ¡ÂÊPER=0.00000e+00,ÎóÂëÂÊBER=0.00000e+00
LTÂë£¬µ±Ç°¿ªÏú=1.90,µ±Ç°Ö¡ÊýÎª600, ÎóÖ¡ÂÊPER=0.00000e+00,ÎóÂëÂÊBER=0.00000e+00
RaptorÂë£¬µ±Ç°¿ªÏú=1.90,µ±Ç°Ö¡ÊýÎª600, ÎóÖ¡ÂÊPER=0.00000e+00,ÎóÂëÂÊBER=0.00000e+00
LTÂë£¬µ±Ç°¿ªÏú=1.90,µ±Ç°Ö¡ÊýÎª700, ÎóÖ¡ÂÊPER=1.42857e-03,ÎóÂëÂÊBER=7.14286e-07
RaptorÂë£¬µ±Ç°¿ªÏú=1.90,µ±Ç°Ö¡ÊýÎª700, ÎóÖ¡ÂÊPER=0.00000e+00,ÎóÂëÂÊBER=0.00000e+00
LTÂë£¬µ±Ç°¿ªÏú=1.90,µ±Ç°Ö¡ÊýÎª800, ÎóÖ¡ÂÊPER=1.25000e-03,ÎóÂëÂÊBER=6.25000e-07
RaptorÂë£¬µ±Ç°¿ªÏú=1.90,µ±Ç°Ö¡ÊýÎª800, ÎóÖ¡ÂÊPER=0.00000e+00,ÎóÂëÂÊBER=0.00000e+00
LTÂë£¬µ±Ç°¿ªÏú=1.90,µ±Ç°Ö¡ÊýÎª900, ÎóÖ¡ÂÊPER=2.22222e-03,ÎóÂëÂÊBER=1.11111e-06
RaptorÂë£¬µ±Ç°¿ªÏú=1.90,µ±Ç°Ö¡ÊýÎª900, ÎóÖ¡ÂÊPER=0.00000e+00,ÎóÂëÂÊBER=0.00000e+00
LTÂë£¬µ±Ç°¿ªÏú=1.90,µ±Ç°Ö¡ÊýÎª1000, ÎóÖ¡ÂÊPER=4.00000e-03,ÎóÂëÂÊBER=2.00000e-06
RaptorÂë£¬µ±Ç°¿ªÏú=1.90,µ±Ç°Ö¡ÊýÎª1000, ÎóÖ¡ÂÊPER=0.00000e+00,ÎóÂëÂÊBER=0.00000e+00
LTÂë£¬µ±Ç°¿ªÏú=1.90,µ±Ç°Ö¡ÊýÎª1100, ÎóÖ¡ÂÊPER=4.54545e-03,ÎóÂëÂÊBER=2.27273e-06
RaptorÂë£¬µ±Ç°¿ªÏú=1.90,µ±Ç°Ö¡ÊýÎª1100, ÎóÖ¡ÂÊPER=0.00000e+00,ÎóÂëÂÊBER=0.00000e+00
LTÂë£¬µ±Ç°¿ªÏú=1.90,µ±Ç°Ö¡ÊýÎª1200, ÎóÖ¡ÂÊPER=5.00000e-03,ÎóÂëÂÊBER=2.50000e-06
RaptorÂë£¬µ±Ç°¿ªÏú=1.90,µ±Ç°Ö¡ÊýÎª1200, ÎóÖ¡ÂÊPER=0.00000e+00,ÎóÂëÂÊBER=0.00000e+00
LTÂë£¬µ±Ç°¿ªÏú=1.90,µ±Ç°Ö¡ÊýÎª1300, ÎóÖ¡ÂÊPER=5.38462e-03,ÎóÂëÂÊBER=3.07692e-06
RaptorÂë£¬µ±Ç°¿ªÏú=1.90,µ±Ç°Ö¡ÊýÎª1300, ÎóÖ¡ÂÊPER=0.00000e+00,ÎóÂëÂÊBER=0.00000e+00
LTÂë£¬µ±Ç°¿ªÏú=1.90,µ±Ç°Ö¡ÊýÎª1400, ÎóÖ¡ÂÊPER=7.14286e-03,ÎóÂëÂÊBER=3.92857e-06
RaptorÂë£¬µ±Ç°¿ªÏú=1.90,µ±Ç°Ö¡ÊýÎª1400, ÎóÖ¡ÂÊPER=0.00000e+00,ÎóÂëÂÊBER=0.00000e+00
LTÂë£¬µ±Ç°¿ªÏú=1.90,µ±Ç°Ö¡ÊýÎª1500, ÎóÖ¡ÂÊPER=7.33333e-03,ÎóÂëÂÊBER=4.00000e-06
RaptorÂë£¬µ±Ç°¿ªÏú=1.90,µ±Ç°Ö¡ÊýÎª1500, ÎóÖ¡ÂÊPER=0.00000e+00,ÎóÂëÂÊBER=0.00000e+00
LTÂë£¬µ±Ç°¿ªÏú=1.90,µ±Ç°Ö¡ÊýÎª1600, ÎóÖ¡ÂÊPER=6.87500e-03,ÎóÂëÂÊBER=3.75000e-06
RaptorÂë£¬µ±Ç°¿ªÏú=1.90,µ±Ç°Ö¡ÊýÎª1600, ÎóÖ¡ÂÊPER=0.00000e+00,ÎóÂëÂÊBER=0.00000e+00
LTÂë£¬µ±Ç°¿ªÏú=1.90,µ±Ç°Ö¡ÊýÎª1700, ÎóÖ¡ÂÊPER=6.47059e-03,ÎóÂëÂÊBER=3.52941e-06
RaptorÂë£¬µ±Ç°¿ªÏú=1.90,µ±Ç°Ö¡ÊýÎª1700, ÎóÖ¡ÂÊPER=0.00000e+00,ÎóÂëÂÊBER=0.00000e+00
LTÂë£¬µ±Ç°¿ªÏú=1.90,µ±Ç°Ö¡ÊýÎª1800, ÎóÖ¡ÂÊPER=6.11111e-03,ÎóÂëÂÊBER=3.33333e-06
RaptorÂë£¬µ±Ç°¿ªÏú=1.90,µ±Ç°Ö¡ÊýÎª1800, ÎóÖ¡ÂÊPER=0.00000e+00,ÎóÂëÂÊBER=0.00000e+00
LTÂë£¬µ±Ç°¿ªÏú=1.90,µ±Ç°Ö¡ÊýÎª1900, ÎóÖ¡ÂÊPER=5.78947e-03,ÎóÂëÂÊBER=3.15789e-06
RaptorÂë£¬µ±Ç°¿ªÏú=1.90,µ±Ç°Ö¡ÊýÎª1900, ÎóÖ¡ÂÊPER=0.00000e+00,ÎóÂëÂÊBER=0.00000e+00
LTÂë£¬µ±Ç°¿ªÏú=1.90,µ±Ç°Ö¡ÊýÎª2000, ÎóÖ¡ÂÊPER=5.50000e-03,ÎóÂëÂÊBER=3.00000e-06
RaptorÂë£¬µ±Ç°¿ªÏú=1.90,µ±Ç°Ö¡ÊýÎª2000, ÎóÖ¡ÂÊPER=0.00000e+00,ÎóÂëÂÊBER=0.00000e+00
LTÂë£¬µ±Ç°¿ªÏú=1.90,µ±Ç°Ö¡ÊýÎª2100, ÎóÖ¡ÂÊPER=5.23810e-03,ÎóÂëÂÊBER=2.85714e-06
RaptorÂë£¬µ±Ç°¿ªÏú=1.90,µ±Ç°Ö¡ÊýÎª2100, ÎóÖ¡ÂÊPER=0.00000e+00,ÎóÂëÂÊBER=0.00000e+00
LTÂë£¬µ±Ç°¿ªÏú=1.90,µ±Ç°Ö¡ÊýÎª2200, ÎóÖ¡ÂÊPER=5.90909e-03,ÎóÂëÂÊBER=3.18182e-06
RaptorÂë£¬µ±Ç°¿ªÏú=1.90,µ±Ç°Ö¡ÊýÎª2200, ÎóÖ¡ÂÊPER=0.00000e+00,ÎóÂëÂÊBER=0.00000e+00
LTÂë£¬µ±Ç°¿ªÏú=1.90,µ±Ç°Ö¡ÊýÎª2300, ÎóÖ¡ÂÊPER=5.65217e-03,ÎóÂëÂÊBER=3.04348e-06
RaptorÂë£¬µ±Ç°¿ªÏú=1.90,µ±Ç°Ö¡ÊýÎª2300, ÎóÖ¡ÂÊPER=0.00000e+00,ÎóÂëÂÊBER=0.00000e+00
LTÂë£¬µ±Ç°¿ªÏú=1.90,µ±Ç°Ö¡ÊýÎª2400, ÎóÖ¡ÂÊPER=6.25000e-03,ÎóÂëÂÊBER=3.33333e-06
RaptorÂë£¬µ±Ç°¿ªÏú=1.90,µ±Ç°Ö¡ÊýÎª2400, ÎóÖ¡ÂÊPER=0.00000e+00,ÎóÂëÂÊBER=0.00000e+00
LTÂë£¬µ±Ç°¿ªÏú=1.90,µ±Ç°Ö¡ÊýÎª2500, ÎóÖ¡ÂÊPER=6.00000e-03,ÎóÂëÂÊBER=3.20000e-06
RaptorÂë£¬µ±Ç°¿ªÏú=1.90,µ±Ç°Ö¡ÊýÎª2500, ÎóÖ¡ÂÊPER=0.00000e+00,ÎóÂëÂÊBER=0.00000e+00
LTÂë£¬µ±Ç°¿ªÏú=1.90,µ±Ç°Ö¡ÊýÎª2600, ÎóÖ¡ÂÊPER=6.15385e-03,ÎóÂëÂÊBER=3.26923e-06
RaptorÂë£¬µ±Ç°¿ªÏú=1.90,µ±Ç°Ö¡ÊýÎª2600, ÎóÖ¡ÂÊPER=0.00000e+00,ÎóÂëÂÊBER=0.00000e+00
LTÂë£¬µ±Ç°¿ªÏú=1.90,µ±Ç°Ö¡ÊýÎª2700, ÎóÖ¡ÂÊPER=6.29630e-03,ÎóÂëÂÊBER=3.33333e-06
RaptorÂë£¬µ±Ç°¿ªÏú=1.90,µ±Ç°Ö¡ÊýÎª2700, ÎóÖ¡ÂÊPER=0.00000e+00,ÎóÂëÂÊBER=0.00000e+00
LTÂë£¬µ±Ç°¿ªÏú=1.90,µ±Ç°Ö¡ÊýÎª2800, ÎóÖ¡ÂÊPER=6.78571e-03,ÎóÂëÂÊBER=3.57143e-06
RaptorÂë£¬µ±Ç°¿ªÏú=1.90,µ±Ç°Ö¡ÊýÎª2800, ÎóÖ¡ÂÊPER=0.00000e+00,ÎóÂëÂÊBER=0.00000e+00
LTÂë£¬µ±Ç°¿ªÏú=1.90,µ±Ç°Ö¡ÊýÎª2900, ÎóÖ¡ÂÊPER=6.55172e-03,ÎóÂëÂÊBER=3.44828e-06
RaptorÂë£¬µ±Ç°¿ªÏú=1.90,µ±Ç°Ö¡ÊýÎª2900, ÎóÖ¡ÂÊPER=0.00000e+00,ÎóÂëÂÊBER=0.00000e+00
LTÂë£¬µ±Ç°¿ªÏú=1.90,µ±Ç°Ö¡ÊýÎª3000, ÎóÖ¡ÂÊPER=6.33333e-03,ÎóÂëÂÊBER=3.33333e-06
RaptorÂë£¬µ±Ç°¿ªÏú=1.90,µ±Ç°Ö¡ÊýÎª3000, ÎóÖ¡ÂÊPER=0.00000e+00,ÎóÂëÂÊBER=0.00000e+00
LTÂë£¬µ±Ç°¿ªÏú=1.90,µ±Ç°Ö¡ÊýÎª3100, ÎóÖ¡ÂÊPER=6.12903e-03,ÎóÂëÂÊBER=3.22581e-06
RaptorÂë£¬µ±Ç°¿ªÏú=1.90,µ±Ç°Ö¡ÊýÎª3100, ÎóÖ¡ÂÊPER=0.00000e+00,ÎóÂëÂÊBER=0.00000e+00
LTÂë£¬µ±Ç°¿ªÏú=1.90,µ±Ç°Ö¡ÊýÎª3200, ÎóÖ¡ÂÊPER=6.56250e-03,ÎóÂëÂÊBER=3.43750e-06
RaptorÂë£¬µ±Ç°¿ªÏú=1.90,µ±Ç°Ö¡ÊýÎª3200, ÎóÖ¡ÂÊPER=0.00000e+00,ÎóÂëÂÊBER=0.00000e+00
LTÂë£¬µ±Ç°¿ªÏú=1.90,µ±Ç°Ö¡ÊýÎª3300, ÎóÖ¡ÂÊPER=6.96970e-03,ÎóÂëÂÊBER=3.63636e-06
RaptorÂë£¬µ±Ç°¿ªÏú=1.90,µ±Ç°Ö¡ÊýÎª3300, ÎóÖ¡ÂÊPER=0.00000e+00,ÎóÂëÂÊBER=0.00000e+00
LTÂë£¬µ±Ç°¿ªÏú=1.90,µ±Ç°Ö¡ÊýÎª3400, ÎóÖ¡ÂÊPER=6.76471e-03,ÎóÂëÂÊBER=3.52941e-06
RaptorÂë£¬µ±Ç°¿ªÏú=1.90,µ±Ç°Ö¡ÊýÎª3400, ÎóÖ¡ÂÊPER=0.00000e+00,ÎóÂëÂÊBER=0.00000e+00
LTÂë£¬µ±Ç°¿ªÏú=1.90,µ±Ç°Ö¡ÊýÎª3500, ÎóÖ¡ÂÊPER=6.57143e-03,ÎóÂëÂÊBER=3.42857e-06
RaptorÂë£¬µ±Ç°¿ªÏú=1.90,µ±Ç°Ö¡ÊýÎª3500, ÎóÖ¡ÂÊPER=0.00000e+00,ÎóÂëÂÊBER=0.00000e+00
LTÂë£¬µ±Ç°¿ªÏú=1.90,µ±Ç°Ö¡ÊýÎª3600, ÎóÖ¡ÂÊPER=6.38889e-03,ÎóÂëÂÊBER=3.33333e-06
RaptorÂë£¬µ±Ç°¿ªÏú=1.90,µ±Ç°Ö¡ÊýÎª3600, ÎóÖ¡ÂÊPER=0.00000e+00,ÎóÂëÂÊBER=0.00000e+00
LTÂë£¬µ±Ç°¿ªÏú=1.90,µ±Ç°Ö¡ÊýÎª3700, ÎóÖ¡ÂÊPER=6.21622e-03,ÎóÂëÂÊBER=3.24324e-06
RaptorÂë£¬µ±Ç°¿ªÏú=1.90,µ±Ç°Ö¡ÊýÎª3700, ÎóÖ¡ÂÊPER=0.00000e+00,ÎóÂëÂÊBER=0.00000e+00
LTÂë£¬µ±Ç°¿ªÏú=1.90,µ±Ç°Ö¡ÊýÎª3800, ÎóÖ¡ÂÊPER=6.31579e-03,ÎóÂëÂÊBER=3.28947e-06
RaptorÂë£¬µ±Ç°¿ªÏú=1.90,µ±Ç°Ö¡ÊýÎª3800, ÎóÖ¡ÂÊPER=0.00000e+00,ÎóÂëÂÊBER=0.00000e+00
LTÂë£¬µ±Ç°¿ªÏú=1.90,µ±Ç°Ö¡ÊýÎª3900, ÎóÖ¡ÂÊPER=6.15385e-03,ÎóÂëÂÊBER=3.20513e-06
RaptorÂë£¬µ±Ç°¿ªÏú=1.90,µ±Ç°Ö¡ÊýÎª3900, ÎóÖ¡ÂÊPER=0.00000e+00,ÎóÂëÂÊBER=0.00000e+00
LTÂë£¬µ±Ç°¿ªÏú=1.90,µ±Ç°Ö¡ÊýÎª4000, ÎóÖ¡ÂÊPER=6.25000e-03,ÎóÂëÂÊBER=3.25000e-06
RaptorÂë£¬µ±Ç°¿ªÏú=1.90,µ±Ç°Ö¡ÊýÎª4000, ÎóÖ¡ÂÊPER=0.00000e+00,ÎóÂëÂÊBER=0.00000e+00
LTÂë£¬µ±Ç°¿ªÏú=1.90,µ±Ç°Ö¡ÊýÎª4100, ÎóÖ¡ÂÊPER=6.34146e-03,ÎóÂëÂÊBER=3.29268e-06
RaptorÂë£¬µ±Ç°¿ªÏú=1.90,µ±Ç°Ö¡ÊýÎª4100, ÎóÖ¡ÂÊPER=0.00000e+00,ÎóÂëÂÊBER=0.00000e+00
LTÂë£¬µ±Ç°¿ªÏú=1.90,µ±Ç°Ö¡ÊýÎª4200, ÎóÖ¡ÂÊPER=6.42857e-03,ÎóÂëÂÊBER=3.33333e-06
RaptorÂë£¬µ±Ç°¿ªÏú=1.90,µ±Ç°Ö¡ÊýÎª4200, ÎóÖ¡ÂÊPER=0.00000e+00,ÎóÂëÂÊBER=0.00000e+00
LTÂë£¬µ±Ç°¿ªÏú=1.90,µ±Ç°Ö¡ÊýÎª4300, ÎóÖ¡ÂÊPER=6.27907e-03,ÎóÂëÂÊBER=3.25581e-06
RaptorÂë£¬µ±Ç°¿ªÏú=1.90,µ±Ç°Ö¡ÊýÎª4300, ÎóÖ¡ÂÊPER=0.00000e+00,ÎóÂëÂÊBER=0.00000e+00
LTÂë£¬µ±Ç°¿ªÏú=1.90,µ±Ç°Ö¡ÊýÎª4400, ÎóÖ¡ÂÊPER=6.13636e-03,ÎóÂëÂÊBER=3.18182e-06
RaptorÂë£¬µ±Ç°¿ªÏú=1.90,µ±Ç°Ö¡ÊýÎª4400, ÎóÖ¡ÂÊPER=0.00000e+00,ÎóÂëÂÊBER=0.00000e+00
LTÂë£¬µ±Ç°¿ªÏú=1.90,µ±Ç°Ö¡ÊýÎª4500, ÎóÖ¡ÂÊPER=6.00000e-03,ÎóÂëÂÊBER=3.11111e-06
RaptorÂë£¬µ±Ç°¿ªÏú=1.90,µ±Ç°Ö¡ÊýÎª4500, ÎóÖ¡ÂÊPER=0.00000e+00,ÎóÂëÂÊBER=0.00000e+00
LTÂë£¬µ±Ç°¿ªÏú=1.90,µ±Ç°Ö¡ÊýÎª4600, ÎóÖ¡ÂÊPER=5.86957e-03,ÎóÂëÂÊBER=3.04348e-06
RaptorÂë£¬µ±Ç°¿ªÏú=1.90,µ±Ç°Ö¡ÊýÎª4600, ÎóÖ¡ÂÊPER=0.00000e+00,ÎóÂëÂÊBER=0.00000e+00
LTÂë£¬µ±Ç°¿ªÏú=1.90,µ±Ç°Ö¡ÊýÎª4700, ÎóÖ¡ÂÊPER=6.38298e-03,ÎóÂëÂÊBER=3.29787e-06
RaptorÂë£¬µ±Ç°¿ªÏú=1.90,µ±Ç°Ö¡ÊýÎª4700, ÎóÖ¡ÂÊPER=0.00000e+00,ÎóÂëÂÊBER=0.00000e+00
LTÂë£¬µ±Ç°¿ªÏú=1.90,µ±Ç°Ö¡ÊýÎª4800, ÎóÖ¡ÂÊPER=6.66667e-03,ÎóÂëÂÊBER=3.43750e-06
RaptorÂë£¬µ±Ç°¿ªÏú=1.90,µ±Ç°Ö¡ÊýÎª4800, ÎóÖ¡ÂÊPER=0.00000e+00,ÎóÂëÂÊBER=0.00000e+00
LTÂë£¬µ±Ç°¿ªÏú=1.90,µ±Ç°Ö¡ÊýÎª4900, ÎóÖ¡ÂÊPER=6.73469e-03,ÎóÂëÂÊBER=3.46939e-06
RaptorÂë£¬µ±Ç°¿ªÏú=1.90,µ±Ç°Ö¡ÊýÎª4900, ÎóÖ¡ÂÊPER=0.00000e+00,ÎóÂëÂÊBER=0.00000e+00
LTÂë£¬µ±Ç°¿ªÏú=1.90,µ±Ç°Ö¡ÊýÎª5000, ÎóÖ¡ÂÊPER=7.00000e-03,ÎóÂëÂÊBER=3.60000e-06
RaptorÂë£¬µ±Ç°¿ªÏú=1.90,µ±Ç°Ö¡ÊýÎª5000, ÎóÖ¡ÂÊPER=0.00000e+00,ÎóÂëÂÊBER=0.00000e+00
µ±Ç°ÐÅµÀ±ê×¼²î=100.00,¿ªÏú=1.90,µ±Ç°Ö¡ÊýÎª5000, LTÂëÎóÂëÂÊBER_LT=3.60000e-06,RaptorÎóÂëÂÊBER=0.00000e+00
LTÂë£¬µ±Ç°¿ªÏú=2.00,µ±Ç°Ö¡ÊýÎª100, ÎóÖ¡ÂÊPER=0.00000e+00,ÎóÂëÂÊBER=0.00000e+00
RaptorÂë£¬µ±Ç°¿ªÏú=2.00,µ±Ç°Ö¡ÊýÎª100, ÎóÖ¡ÂÊPER=0.00000e+00,ÎóÂëÂÊBER=0.00000e+00
LTÂë£¬µ±Ç°¿ªÏú=2.00,µ±Ç°Ö¡ÊýÎª200, ÎóÖ¡ÂÊPER=5.00000e-03,ÎóÂëÂÊBER=2.50000e-06
RaptorÂë£¬µ±Ç°¿ªÏú=2.00,µ±Ç°Ö¡ÊýÎª200, ÎóÖ¡ÂÊPER=0.00000e+00,ÎóÂëÂÊBER=0.00000e+00
LTÂë£¬µ±Ç°¿ªÏú=2.00,µ±Ç°Ö¡ÊýÎª300, ÎóÖ¡ÂÊPER=6.66667e-03,ÎóÂëÂÊBER=3.33333e-06
RaptorÂë£¬µ±Ç°¿ªÏú=2.00,µ±Ç°Ö¡ÊýÎª300, ÎóÖ¡ÂÊPER=0.00000e+00,ÎóÂëÂÊBER=0.00000e+00
LTÂë£¬µ±Ç°¿ªÏú=2.00,µ±Ç°Ö¡ÊýÎª400, ÎóÖ¡ÂÊPER=5.00000e-03,ÎóÂëÂÊBER=2.50000e-06
RaptorÂë£¬µ±Ç°¿ªÏú=2.00,µ±Ç°Ö¡ÊýÎª400, ÎóÖ¡ÂÊPER=0.00000e+00,ÎóÂëÂÊBER=0.00000e+00
LTÂë£¬µ±Ç°¿ªÏú=2.00,µ±Ç°Ö¡ÊýÎª500, ÎóÖ¡ÂÊPER=4.00000e-03,ÎóÂëÂÊBER=2.00000e-06
RaptorÂë£¬µ±Ç°¿ªÏú=2.00,µ±Ç°Ö¡ÊýÎª500, ÎóÖ¡ÂÊPER=0.00000e+00,ÎóÂëÂÊBER=0.00000e+00
LTÂë£¬µ±Ç°¿ªÏú=2.00,µ±Ç°Ö¡ÊýÎª600, ÎóÖ¡ÂÊPER=5.00000e-03,ÎóÂëÂÊBER=2.50000e-06
RaptorÂë£¬µ±Ç°¿ªÏú=2.00,µ±Ç°Ö¡ÊýÎª600, ÎóÖ¡ÂÊPER=0.00000e+00,ÎóÂëÂÊBER=0.00000e+00
LTÂë£¬µ±Ç°¿ªÏú=2.00,µ±Ç°Ö¡ÊýÎª700, ÎóÖ¡ÂÊPER=4.28571e-03,ÎóÂëÂÊBER=2.14286e-06
RaptorÂë£¬µ±Ç°¿ªÏú=2.00,µ±Ç°Ö¡ÊýÎª700, ÎóÖ¡ÂÊPER=0.00000e+00,ÎóÂëÂÊBER=0.00000e+00
LTÂë£¬µ±Ç°¿ªÏú=2.00,µ±Ç°Ö¡ÊýÎª800, ÎóÖ¡ÂÊPER=3.75000e-03,ÎóÂëÂÊBER=1.87500e-06
RaptorÂë£¬µ±Ç°¿ªÏú=2.00,µ±Ç°Ö¡ÊýÎª800, ÎóÖ¡ÂÊPER=0.00000e+00,ÎóÂëÂÊBER=0.00000e+00
LTÂë£¬µ±Ç°¿ªÏú=2.00,µ±Ç°Ö¡ÊýÎª900, ÎóÖ¡ÂÊPER=3.33333e-03,ÎóÂëÂÊBER=1.66667e-06
RaptorÂë£¬µ±Ç°¿ªÏú=2.00,µ±Ç°Ö¡ÊýÎª900, ÎóÖ¡ÂÊPER=0.00000e+00,ÎóÂëÂÊBER=0.00000e+00
LTÂë£¬µ±Ç°¿ªÏú=2.00,µ±Ç°Ö¡ÊýÎª1000, ÎóÖ¡ÂÊPER=3.00000e-03,ÎóÂëÂÊBER=1.50000e-06
RaptorÂë£¬µ±Ç°¿ªÏú=2.00,µ±Ç°Ö¡ÊýÎª1000, ÎóÖ¡ÂÊPER=0.00000e+00,ÎóÂëÂÊBER=0.00000e+00
LTÂë£¬µ±Ç°¿ªÏú=2.00,µ±Ç°Ö¡ÊýÎª1100, ÎóÖ¡ÂÊPER=2.72727e-03,ÎóÂëÂÊBER=1.36364e-06
RaptorÂë£¬µ±Ç°¿ªÏú=2.00,µ±Ç°Ö¡ÊýÎª1100, ÎóÖ¡ÂÊPER=0.00000e+00,ÎóÂëÂÊBER=0.00000e+00
LTÂë£¬µ±Ç°¿ªÏú=2.00,µ±Ç°Ö¡ÊýÎª1200, ÎóÖ¡ÂÊPER=2.50000e-03,ÎóÂëÂÊBER=1.25000e-06
RaptorÂë£¬µ±Ç°¿ªÏú=2.00,µ±Ç°Ö¡ÊýÎª1200, ÎóÖ¡ÂÊPER=0.00000e+00,ÎóÂëÂÊBER=0.00000e+00
LTÂë£¬µ±Ç°¿ªÏú=2.00,µ±Ç°Ö¡ÊýÎª1300, ÎóÖ¡ÂÊPER=2.30769e-03,ÎóÂëÂÊBER=1.15385e-06
RaptorÂë£¬µ±Ç°¿ªÏú=2.00,µ±Ç°Ö¡ÊýÎª1300, ÎóÖ¡ÂÊPER=0.00000e+00,ÎóÂëÂÊBER=0.00000e+00
LTÂë£¬µ±Ç°¿ªÏú=2.00,µ±Ç°Ö¡ÊýÎª1400, ÎóÖ¡ÂÊPER=4.28571e-03,ÎóÂëÂÊBER=2.14286e-06
RaptorÂë£¬µ±Ç°¿ªÏú=2.00,µ±Ç°Ö¡ÊýÎª1400, ÎóÖ¡ÂÊPER=0.00000e+00,ÎóÂëÂÊBER=0.00000e+00
LTÂë£¬µ±Ç°¿ªÏú=2.00,µ±Ç°Ö¡ÊýÎª1500, ÎóÖ¡ÂÊPER=4.66667e-03,ÎóÂëÂÊBER=2.33333e-06
RaptorÂë£¬µ±Ç°¿ªÏú=2.00,µ±Ç°Ö¡ÊýÎª1500, ÎóÖ¡ÂÊPER=0.00000e+00,ÎóÂëÂÊBER=0.00000e+00
LTÂë£¬µ±Ç°¿ªÏú=2.00,µ±Ç°Ö¡ÊýÎª1600, ÎóÖ¡ÂÊPER=5.62500e-03,ÎóÂëÂÊBER=2.81250e-06
RaptorÂë£¬µ±Ç°¿ªÏú=2.00,µ±Ç°Ö¡ÊýÎª1600, ÎóÖ¡ÂÊPER=0.00000e+00,ÎóÂëÂÊBER=0.00000e+00
LTÂë£¬µ±Ç°¿ªÏú=2.00,µ±Ç°Ö¡ÊýÎª1700, ÎóÖ¡ÂÊPER=5.29412e-03,ÎóÂëÂÊBER=2.64706e-06
RaptorÂë£¬µ±Ç°¿ªÏú=2.00,µ±Ç°Ö¡ÊýÎª1700, ÎóÖ¡ÂÊPER=0.00000e+00,ÎóÂëÂÊBER=0.00000e+00
LTÂë£¬µ±Ç°¿ªÏú=2.00,µ±Ç°Ö¡ÊýÎª1800, ÎóÖ¡ÂÊPER=5.55556e-03,ÎóÂëÂÊBER=2.77778e-06
RaptorÂë£¬µ±Ç°¿ªÏú=2.00,µ±Ç°Ö¡ÊýÎª1800, ÎóÖ¡ÂÊPER=0.00000e+00,ÎóÂëÂÊBER=0.00000e+00
LTÂë£¬µ±Ç°¿ªÏú=2.00,µ±Ç°Ö¡ÊýÎª1900, ÎóÖ¡ÂÊPER=5.26316e-03,ÎóÂëÂÊBER=2.63158e-06
RaptorÂë£¬µ±Ç°¿ªÏú=2.00,µ±Ç°Ö¡ÊýÎª1900, ÎóÖ¡ÂÊPER=0.00000e+00,ÎóÂëÂÊBER=0.00000e+00
LTÂë£¬µ±Ç°¿ªÏú=2.00,µ±Ç°Ö¡ÊýÎª2000, ÎóÖ¡ÂÊPER=5.50000e-03,ÎóÂëÂÊBER=2.75000e-06
RaptorÂë£¬µ±Ç°¿ªÏú=2.00,µ±Ç°Ö¡ÊýÎª2000, ÎóÖ¡ÂÊPER=0.00000e+00,ÎóÂëÂÊBER=0.00000e+00
LTÂë£¬µ±Ç°¿ªÏú=2.00,µ±Ç°Ö¡ÊýÎª2100, ÎóÖ¡ÂÊPER=5.71429e-03,ÎóÂëÂÊBER=2.85714e-06
RaptorÂë£¬µ±Ç°¿ªÏú=2.00,µ±Ç°Ö¡ÊýÎª2100, ÎóÖ¡ÂÊPER=0.00000e+00,ÎóÂëÂÊBER=0.00000e+00
LTÂë£¬µ±Ç°¿ªÏú=2.00,µ±Ç°Ö¡ÊýÎª2200, ÎóÖ¡ÂÊPER=5.45455e-03,ÎóÂëÂÊBER=2.72727e-06
RaptorÂë£¬µ±Ç°¿ªÏú=2.00,µ±Ç°Ö¡ÊýÎª2200, ÎóÖ¡ÂÊPER=0.00000e+00,ÎóÂëÂÊBER=0.00000e+00
LTÂë£¬µ±Ç°¿ªÏú=2.00,µ±Ç°Ö¡ÊýÎª2300, ÎóÖ¡ÂÊPER=5.21739e-03,ÎóÂëÂÊBER=2.60870e-06
RaptorÂë£¬µ±Ç°¿ªÏú=2.00,µ±Ç°Ö¡ÊýÎª2300, ÎóÖ¡ÂÊPER=0.00000e+00,ÎóÂëÂÊBER=0.00000e+00
LTÂë£¬µ±Ç°¿ªÏú=2.00,µ±Ç°Ö¡ÊýÎª2400, ÎóÖ¡ÂÊPER=5.00000e-03,ÎóÂëÂÊBER=2.50000e-06
RaptorÂë£¬µ±Ç°¿ªÏú=2.00,µ±Ç°Ö¡ÊýÎª2400, ÎóÖ¡ÂÊPER=0.00000e+00,ÎóÂëÂÊBER=0.00000e+00
LTÂë£¬µ±Ç°¿ªÏú=2.00,µ±Ç°Ö¡ÊýÎª2500, ÎóÖ¡ÂÊPER=4.80000e-03,ÎóÂëÂÊBER=2.40000e-06
RaptorÂë£¬µ±Ç°¿ªÏú=2.00,µ±Ç°Ö¡ÊýÎª2500, ÎóÖ¡ÂÊPER=0.00000e+00,ÎóÂëÂÊBER=0.00000e+00
LTÂë£¬µ±Ç°¿ªÏú=2.00,µ±Ç°Ö¡ÊýÎª2600, ÎóÖ¡ÂÊPER=4.61538e-03,ÎóÂëÂÊBER=2.30769e-06
RaptorÂë£¬µ±Ç°¿ªÏú=2.00,µ±Ç°Ö¡ÊýÎª2600, ÎóÖ¡ÂÊPER=0.00000e+00,ÎóÂëÂÊBER=0.00000e+00
LTÂë£¬µ±Ç°¿ªÏú=2.00,µ±Ç°Ö¡ÊýÎª2700, ÎóÖ¡ÂÊPER=4.44444e-03,ÎóÂëÂÊBER=2.22222e-06
RaptorÂë£¬µ±Ç°¿ªÏú=2.00,µ±Ç°Ö¡ÊýÎª2700, ÎóÖ¡ÂÊPER=0.00000e+00,ÎóÂëÂÊBER=0.00000e+00
LTÂë£¬µ±Ç°¿ªÏú=2.00,µ±Ç°Ö¡ÊýÎª2800, ÎóÖ¡ÂÊPER=5.35714e-03,ÎóÂëÂÊBER=2.67857e-06
RaptorÂë£¬µ±Ç°¿ªÏú=2.00,µ±Ç°Ö¡ÊýÎª2800, ÎóÖ¡ÂÊPER=0.00000e+00,ÎóÂëÂÊBER=0.00000e+00
LTÂë£¬µ±Ç°¿ªÏú=2.00,µ±Ç°Ö¡ÊýÎª2900, ÎóÖ¡ÂÊPER=5.51724e-03,ÎóÂëÂÊBER=2.75862e-06
RaptorÂë£¬µ±Ç°¿ªÏú=2.00,µ±Ç°Ö¡ÊýÎª2900, ÎóÖ¡ÂÊPER=0.00000e+00,ÎóÂëÂÊBER=0.00000e+00
LTÂë£¬µ±Ç°¿ªÏú=2.00,µ±Ç°Ö¡ÊýÎª3000, ÎóÖ¡ÂÊPER=5.33333e-03,ÎóÂëÂÊBER=2.66667e-06
RaptorÂë£¬µ±Ç°¿ªÏú=2.00,µ±Ç°Ö¡ÊýÎª3000, ÎóÖ¡ÂÊPER=0.00000e+00,ÎóÂëÂÊBER=0.00000e+00
LTÂë£¬µ±Ç°¿ªÏú=2.00,µ±Ç°Ö¡ÊýÎª3100, ÎóÖ¡ÂÊPER=5.16129e-03,ÎóÂëÂÊBER=2.58065e-06
RaptorÂë£¬µ±Ç°¿ªÏú=2.00,µ±Ç°Ö¡ÊýÎª3100, ÎóÖ¡ÂÊPER=0.00000e+00,ÎóÂëÂÊBER=0.00000e+00
LTÂë£¬µ±Ç°¿ªÏú=2.00,µ±Ç°Ö¡ÊýÎª3200, ÎóÖ¡ÂÊPER=5.00000e-03,ÎóÂëÂÊBER=2.50000e-06
RaptorÂë£¬µ±Ç°¿ªÏú=2.00,µ±Ç°Ö¡ÊýÎª3200, ÎóÖ¡ÂÊPER=0.00000e+00,ÎóÂëÂÊBER=0.00000e+00
LTÂë£¬µ±Ç°¿ªÏú=2.00,µ±Ç°Ö¡ÊýÎª3300, ÎóÖ¡ÂÊPER=4.84848e-03,ÎóÂëÂÊBER=2.42424e-06
RaptorÂë£¬µ±Ç°¿ªÏú=2.00,µ±Ç°Ö¡ÊýÎª3300, ÎóÖ¡ÂÊPER=0.00000e+00,ÎóÂëÂÊBER=0.00000e+00
LTÂë£¬µ±Ç°¿ªÏú=2.00,µ±Ç°Ö¡ÊýÎª3400, ÎóÖ¡ÂÊPER=4.70588e-03,ÎóÂëÂÊBER=2.35294e-06
RaptorÂë£¬µ±Ç°¿ªÏú=2.00,µ±Ç°Ö¡ÊýÎª3400, ÎóÖ¡ÂÊPER=0.00000e+00,ÎóÂëÂÊBER=0.00000e+00
LTÂë£¬µ±Ç°¿ªÏú=2.00,µ±Ç°Ö¡ÊýÎª3500, ÎóÖ¡ÂÊPER=4.57143e-03,ÎóÂëÂÊBER=2.28571e-06
RaptorÂë£¬µ±Ç°¿ªÏú=2.00,µ±Ç°Ö¡ÊýÎª3500, ÎóÖ¡ÂÊPER=0.00000e+00,ÎóÂëÂÊBER=0.00000e+00
LTÂë£¬µ±Ç°¿ªÏú=2.00,µ±Ç°Ö¡ÊýÎª3600, ÎóÖ¡ÂÊPER=4.72222e-03,ÎóÂëÂÊBER=2.36111e-06
RaptorÂë£¬µ±Ç°¿ªÏú=2.00,µ±Ç°Ö¡ÊýÎª3600, ÎóÖ¡ÂÊPER=0.00000e+00,ÎóÂëÂÊBER=0.00000e+00
LTÂë£¬µ±Ç°¿ªÏú=2.00,µ±Ç°Ö¡ÊýÎª3700, ÎóÖ¡ÂÊPER=4.59459e-03,ÎóÂëÂÊBER=2.29730e-06
RaptorÂë£¬µ±Ç°¿ªÏú=2.00,µ±Ç°Ö¡ÊýÎª3700, ÎóÖ¡ÂÊPER=0.00000e+00,ÎóÂëÂÊBER=0.00000e+00
LTÂë£¬µ±Ç°¿ªÏú=2.00,µ±Ç°Ö¡ÊýÎª3800, ÎóÖ¡ÂÊPER=4.47368e-03,ÎóÂëÂÊBER=2.23684e-06
RaptorÂë£¬µ±Ç°¿ªÏú=2.00,µ±Ç°Ö¡ÊýÎª3800, ÎóÖ¡ÂÊPER=0.00000e+00,ÎóÂëÂÊBER=0.00000e+00
LTÂë£¬µ±Ç°¿ªÏú=2.00,µ±Ç°Ö¡ÊýÎª3900, ÎóÖ¡ÂÊPER=4.35897e-03,ÎóÂëÂÊBER=2.17949e-06
RaptorÂë£¬µ±Ç°¿ªÏú=2.00,µ±Ç°Ö¡ÊýÎª3900, ÎóÖ¡ÂÊPER=0.00000e+00,ÎóÂëÂÊBER=0.00000e+00
LTÂë£¬µ±Ç°¿ªÏú=2.00,µ±Ç°Ö¡ÊýÎª4000, ÎóÖ¡ÂÊPER=4.25000e-03,ÎóÂëÂÊBER=2.12500e-06
RaptorÂë£¬µ±Ç°¿ªÏú=2.00,µ±Ç°Ö¡ÊýÎª4000, ÎóÖ¡ÂÊPER=0.00000e+00,ÎóÂëÂÊBER=0.00000e+00
LTÂë£¬µ±Ç°¿ªÏú=2.00,µ±Ç°Ö¡ÊýÎª4100, ÎóÖ¡ÂÊPER=4.14634e-03,ÎóÂëÂÊBER=2.07317e-06
RaptorÂë£¬µ±Ç°¿ªÏú=2.00,µ±Ç°Ö¡ÊýÎª4100, ÎóÖ¡ÂÊPER=0.00000e+00,ÎóÂëÂÊBER=0.00000e+00
LTÂë£¬µ±Ç°¿ªÏú=2.00,µ±Ç°Ö¡ÊýÎª4200, ÎóÖ¡ÂÊPER=4.28571e-03,ÎóÂëÂÊBER=2.14286e-06
RaptorÂë£¬µ±Ç°¿ªÏú=2.00,µ±Ç°Ö¡ÊýÎª4200, ÎóÖ¡ÂÊPER=0.00000e+00,ÎóÂëÂÊBER=0.00000e+00
LTÂë£¬µ±Ç°¿ªÏú=2.00,µ±Ç°Ö¡ÊýÎª4300, ÎóÖ¡ÂÊPER=4.18605e-03,ÎóÂëÂÊBER=2.09302e-06
RaptorÂë£¬µ±Ç°¿ªÏú=2.00,µ±Ç°Ö¡ÊýÎª4300, ÎóÖ¡ÂÊPER=0.00000e+00,ÎóÂëÂÊBER=0.00000e+00
LTÂë£¬µ±Ç°¿ªÏú=2.00,µ±Ç°Ö¡ÊýÎª4400, ÎóÖ¡ÂÊPER=4.09091e-03,ÎóÂëÂÊBER=2.04545e-06
RaptorÂë£¬µ±Ç°¿ªÏú=2.00,µ±Ç°Ö¡ÊýÎª4400, ÎóÖ¡ÂÊPER=0.00000e+00,ÎóÂëÂÊBER=0.00000e+00
LTÂë£¬µ±Ç°¿ªÏú=2.00,µ±Ç°Ö¡ÊýÎª4500, ÎóÖ¡ÂÊPER=4.00000e-03,ÎóÂëÂÊBER=2.00000e-06
RaptorÂë£¬µ±Ç°¿ªÏú=2.00,µ±Ç°Ö¡ÊýÎª4500, ÎóÖ¡ÂÊPER=0.00000e+00,ÎóÂëÂÊBER=0.00000e+00
LTÂë£¬µ±Ç°¿ªÏú=2.00,µ±Ç°Ö¡ÊýÎª4600, ÎóÖ¡ÂÊPER=3.91304e-03,ÎóÂëÂÊBER=1.95652e-06
RaptorÂë£¬µ±Ç°¿ªÏú=2.00,µ±Ç°Ö¡ÊýÎª4600, ÎóÖ¡ÂÊPER=0.00000e+00,ÎóÂëÂÊBER=0.00000e+00
LTÂë£¬µ±Ç°¿ªÏú=2.00,µ±Ç°Ö¡ÊýÎª4700, ÎóÖ¡ÂÊPER=4.04255e-03,ÎóÂëÂÊBER=2.02128e-06
RaptorÂë£¬µ±Ç°¿ªÏú=2.00,µ±Ç°Ö¡ÊýÎª4700, ÎóÖ¡ÂÊPER=0.00000e+00,ÎóÂëÂÊBER=0.00000e+00
LTÂë£¬µ±Ç°¿ªÏú=2.00,µ±Ç°Ö¡ÊýÎª4800, ÎóÖ¡ÂÊPER=4.16667e-03,ÎóÂëÂÊBER=2.08333e-06
RaptorÂë£¬µ±Ç°¿ªÏú=2.00,µ±Ç°Ö¡ÊýÎª4800, ÎóÖ¡ÂÊPER=0.00000e+00,ÎóÂëÂÊBER=0.00000e+00
LTÂë£¬µ±Ç°¿ªÏú=2.00,µ±Ç°Ö¡ÊýÎª4900, ÎóÖ¡ÂÊPER=4.28571e-03,ÎóÂëÂÊBER=2.14286e-06
RaptorÂë£¬µ±Ç°¿ªÏú=2.00,µ±Ç°Ö¡ÊýÎª4900, ÎóÖ¡ÂÊPER=0.00000e+00,ÎóÂëÂÊBER=0.00000e+00
LTÂë£¬µ±Ç°¿ªÏú=2.00,µ±Ç°Ö¡ÊýÎª5000, ÎóÖ¡ÂÊPER=4.20000e-03,ÎóÂëÂÊBER=2.10000e-06
RaptorÂë£¬µ±Ç°¿ªÏú=2.00,µ±Ç°Ö¡ÊýÎª5000, ÎóÖ¡ÂÊPER=0.00000e+00,ÎóÂëÂÊBER=0.00000e+00
µ±Ç°ÐÅµÀ±ê×¼²î=100.00,¿ªÏú=2.00,µ±Ç°Ö¡ÊýÎª5000, LTÂëÎóÂëÂÊBER_LT=2.10000e-06,RaptorÎóÂëÂÊBER=0.00000e+00
ÐÅµÀ±ê×¼²î·¶Î§Îª£º
Inf  
¿ªÏú·¶Î§Îª£º
0.50  0.60  0.70  0.80  0.90  1.00  1.10  1.20  1.30  1.40  1.50  1.60  1.70  1.80  1.90  2.00  
LTÎóÂëÂÊBER_LTÎª£º
1.32925e-01  1.37900e-01  1.25600e-01  1.14100e-01  8.68750e-02  6.68500e-02  2.39250e-02  8.27083e-03  4.72414e-03  1.56818e-03  3.50877e-04  5.52310e-05  2.05255e-05  9.00000e-06  3.60000e-06  2.10000e-06  
RaptorÎóÂëÂÊBERÎª£º
1.33061e-01  1.37959e-01  1.25765e-01  1.14133e-01  8.66582e-02  6.68112e-02  2.39541e-02  8.33333e-03  4.73258e-03  1.10544e-03  2.27354e-04  2.81791e-05  7.22580e-06  1.42857e-06  0.00000e+00  0.00000e+00  
Ê±¼äÒÑ¹ý 20118.228069 Ãë¡£
