# Supplementary material for: An Efficient Design of Systematic Rateless Codes
Source: Hindawi journal article supplement (doi:10.1155/2020/8068414), 2020-05-19
Supplement: f1 [file 8068414.f1.zip › supplementary files/Matlab_code_for_Figure1/BER_by_Simulation/实际码字结果/AWGN_dist2016977_K4900_S.txt]

20190612²âÊÔËõÐ¡ÄÚÂëÊä³öLLRÐ§¹û£¬ÇÒËõ¼õÒò×ÓÎª

zoom_in =

     1


rho =

     0


sigma_n_2 =

   0.954529000000000


sigma_vec =

   Inf


dist_num =

     2.016977000000000e+03

µ±Ç°ÐÅµÀÎªPBIÐÅµÀ
K =

        4900

ÕýÔÚ¶ÔÍâÂë½øÐÐÏßÐÔPEG±àÂë£¬ÇëÉÔµÈ...
µ±Ç°Ñ¡ÔñµÄÊÇÏµÍ³Âë
´íÎó±ÈÌØÊýºÍÖ¡Êý¶¼´ïµ½Ò»¶¨Á¿£¬ÐèÒªÔö¼Ó¿ªÏú
µ±Ç°ÐÅµÀ±ê×¼²î=100.00,¿ªÏú=0.50,µ±Ç°Ö¡ÊýÎª20, LTÂëÎóÂëÂÊBER_LT=1.37190e-01,RaptorÎóÂëÂÊBER=1.37388e-01
´íÎó±ÈÌØÊýºÍÖ¡Êý¶¼´ïµ½Ò»¶¨Á¿£¬ÐèÒªÔö¼Ó¿ªÏú
µ±Ç°ÐÅµÀ±ê×¼²î=100.00,¿ªÏú=0.60,µ±Ç°Ö¡ÊýÎª20, LTÂëÎóÂëÂÊBER_LT=1.30940e-01,RaptorÎóÂëÂÊBER=1.30878e-01
´íÎó±ÈÌØÊýºÍÖ¡Êý¶¼´ïµ½Ò»¶¨Á¿£¬ÐèÒªÔö¼Ó¿ªÏú
µ±Ç°ÐÅµÀ±ê×¼²î=100.00,¿ªÏú=0.70,µ±Ç°Ö¡ÊýÎª20, LTÂëÎóÂëÂÊBER_LT=1.25350e-01,RaptorÎóÂëÂÊBER=1.25490e-01
´íÎó±ÈÌØÊýºÍÖ¡Êý¶¼´ïµ½Ò»¶¨Á¿£¬ÐèÒªÔö¼Ó¿ªÏú
µ±Ç°ÐÅµÀ±ê×¼²î=100.00,¿ªÏú=0.80,µ±Ç°Ö¡ÊýÎª20, LTÂëÎóÂëÂÊBER_LT=1.16920e-01,RaptorÎóÂëÂÊBER=1.16806e-01
´íÎó±ÈÌØÊýºÍÖ¡Êý¶¼´ïµ½Ò»¶¨Á¿£¬ÐèÒªÔö¼Ó¿ªÏú
µ±Ç°ÐÅµÀ±ê×¼²î=100.00,¿ªÏú=0.90,µ±Ç°Ö¡ÊýÎª20, LTÂëÎóÂëÂÊBER_LT=1.04200e-01,RaptorÎóÂëÂÊBER=1.04163e-01
´íÎó±ÈÌØÊýºÍÖ¡Êý¶¼´ïµ½Ò»¶¨Á¿£¬ÐèÒªÔö¼Ó¿ªÏú
µ±Ç°ÐÅµÀ±ê×¼²î=100.00,¿ªÏú=1.00,µ±Ç°Ö¡ÊýÎª20, LTÂëÎóÂëÂÊBER_LT=6.15300e-02,RaptorÎóÂëÂÊBER=6.16429e-02
´íÎó±ÈÌØÊýºÍÖ¡Êý¶¼´ïµ½Ò»¶¨Á¿£¬ÐèÒªÔö¼Ó¿ªÏú
µ±Ç°ÐÅµÀ±ê×¼²î=100.00,¿ªÏú=1.10,µ±Ç°Ö¡ÊýÎª20, LTÂëÎóÂëÂÊBER_LT=1.73200e-02,RaptorÎóÂëÂÊBER=1.72449e-02
´íÎó±ÈÌØÊýºÍÖ¡Êý¶¼´ïµ½Ò»¶¨Á¿£¬ÐèÒªÔö¼Ó¿ªÏú
µ±Ç°ÐÅµÀ±ê×¼²î=100.00,¿ªÏú=1.20,µ±Ç°Ö¡ÊýÎª20, LTÂëÎóÂëÂÊBER_LT=8.92000e-03,RaptorÎóÂëÂÊBER=8.65306e-03
´íÎó±ÈÌØÊýºÍÖ¡Êý¶¼´ïµ½Ò»¶¨Á¿£¬ÐèÒªÔö¼Ó¿ªÏú
µ±Ç°ÐÅµÀ±ê×¼²î=100.00,¿ªÏú=1.30,µ±Ç°Ö¡ÊýÎª22, LTÂëÎóÂëÂÊBER_LT=5.03636e-03,RaptorÎóÂëÂÊBER=4.31354e-03
´íÎó±ÈÌØÊýºÍÖ¡Êý¶¼´ïµ½Ò»¶¨Á¿£¬ÐèÒªÔö¼Ó¿ªÏú
µ±Ç°ÐÅµÀ±ê×¼²î=100.00,¿ªÏú=1.40,µ±Ç°Ö¡ÊýÎª66, LTÂëÎóÂëÂÊBER_LT=9.96970e-04,RaptorÎóÂëÂÊBER=7.66852e-04
LTÂë£¬µ±Ç°¿ªÏú=1.50,µ±Ç°Ö¡ÊýÎª100, ÎóÖ¡ÂÊPER=1.30000e-01,ÎóÂëÂÊBER=1.24000e-04
RaptorÂë£¬µ±Ç°¿ªÏú=1.50,µ±Ç°Ö¡ÊýÎª100, ÎóÖ¡ÂÊPER=1.00000e-02,ÎóÂëÂÊBER=6.12245e-05
LTÂë£¬µ±Ç°¿ªÏú=1.50,µ±Ç°Ö¡ÊýÎª200, ÎóÖ¡ÂÊPER=1.40000e-01,ÎóÂëÂÊBER=8.10000e-05
RaptorÂë£¬µ±Ç°¿ªÏú=1.50,µ±Ç°Ö¡ÊýÎª200, ÎóÖ¡ÂÊPER=5.00000e-03,ÎóÂëÂÊBER=3.06122e-05
LTÂë£¬µ±Ç°¿ªÏú=1.50,µ±Ç°Ö¡ÊýÎª300, ÎóÖ¡ÂÊPER=1.30000e-01,ÎóÂëÂÊBER=6.20000e-05
RaptorÂë£¬µ±Ç°¿ªÏú=1.50,µ±Ç°Ö¡ÊýÎª300, ÎóÖ¡ÂÊPER=3.33333e-03,ÎóÂëÂÊBER=2.04082e-05
´íÎó±ÈÌØÊýºÍÖ¡Êý¶¼´ïµ½Ò»¶¨Á¿£¬ÐèÒªÔö¼Ó¿ªÏú
µ±Ç°ÐÅµÀ±ê×¼²î=100.00,¿ªÏú=1.50,µ±Ç°Ö¡ÊýÎª360, LTÂëÎóÂëÂÊBER_LT=5.55556e-05,RaptorÎóÂëÂÊBER=1.70068e-05
LTÂë£¬µ±Ç°¿ªÏú=1.60,µ±Ç°Ö¡ÊýÎª100, ÎóÖ¡ÂÊPER=3.00000e-02,ÎóÂëÂÊBER=6.00000e-06
RaptorÂë£¬µ±Ç°¿ªÏú=1.60,µ±Ç°Ö¡ÊýÎª100, ÎóÖ¡ÂÊPER=0.00000e+00,ÎóÂëÂÊBER=0.00000e+00
LTÂë£¬µ±Ç°¿ªÏú=1.60,µ±Ç°Ö¡ÊýÎª200, ÎóÖ¡ÂÊPER=5.50000e-02,ÎóÂëÂÊBER=1.30000e-05
RaptorÂë£¬µ±Ç°¿ªÏú=1.60,µ±Ç°Ö¡ÊýÎª200, ÎóÖ¡ÂÊPER=0.00000e+00,ÎóÂëÂÊBER=0.00000e+00
LTÂë£¬µ±Ç°¿ªÏú=1.60,µ±Ç°Ö¡ÊýÎª300, ÎóÖ¡ÂÊPER=5.33333e-02,ÎóÂëÂÊBER=1.26667e-05
RaptorÂë£¬µ±Ç°¿ªÏú=1.60,µ±Ç°Ö¡ÊýÎª300, ÎóÖ¡ÂÊPER=0.00000e+00,ÎóÂëÂÊBER=0.00000e+00
LTÂë£¬µ±Ç°¿ªÏú=1.60,µ±Ç°Ö¡ÊýÎª400, ÎóÖ¡ÂÊPER=5.50000e-02,ÎóÂëÂÊBER=1.35000e-05
RaptorÂë£¬µ±Ç°¿ªÏú=1.60,µ±Ç°Ö¡ÊýÎª400, ÎóÖ¡ÂÊPER=0.00000e+00,ÎóÂëÂÊBER=0.00000e+00
LTÂë£¬µ±Ç°¿ªÏú=1.60,µ±Ç°Ö¡ÊýÎª500, ÎóÖ¡ÂÊPER=5.20000e-02,ÎóÂëÂÊBER=1.24000e-05
RaptorÂë£¬µ±Ç°¿ªÏú=1.60,µ±Ç°Ö¡ÊýÎª500, ÎóÖ¡ÂÊPER=0.00000e+00,ÎóÂëÂÊBER=0.00000e+00
LTÂë£¬µ±Ç°¿ªÏú=1.60,µ±Ç°Ö¡ÊýÎª600, ÎóÖ¡ÂÊPER=6.00000e-02,ÎóÂëÂÊBER=1.36667e-05
RaptorÂë£¬µ±Ç°¿ªÏú=1.60,µ±Ç°Ö¡ÊýÎª600, ÎóÖ¡ÂÊPER=0.00000e+00,ÎóÂëÂÊBER=0.00000e+00
LTÂë£¬µ±Ç°¿ªÏú=1.60,µ±Ç°Ö¡ÊýÎª700, ÎóÖ¡ÂÊPER=5.85714e-02,ÎóÂëÂÊBER=1.31429e-05
RaptorÂë£¬µ±Ç°¿ªÏú=1.60,µ±Ç°Ö¡ÊýÎª700, ÎóÖ¡ÂÊPER=0.00000e+00,ÎóÂëÂÊBER=0.00000e+00
LTÂë£¬µ±Ç°¿ªÏú=1.60,µ±Ç°Ö¡ÊýÎª800, ÎóÖ¡ÂÊPER=5.87500e-02,ÎóÂëÂÊBER=1.30000e-05
RaptorÂë£¬µ±Ç°¿ªÏú=1.60,µ±Ç°Ö¡ÊýÎª800, ÎóÖ¡ÂÊPER=0.00000e+00,ÎóÂëÂÊBER=0.00000e+00
LTÂë£¬µ±Ç°¿ªÏú=1.60,µ±Ç°Ö¡ÊýÎª900, ÎóÖ¡ÂÊPER=5.88889e-02,ÎóÂëÂÊBER=1.33333e-05
RaptorÂë£¬µ±Ç°¿ªÏú=1.60,µ±Ç°Ö¡ÊýÎª900, ÎóÖ¡ÂÊPER=0.00000e+00,ÎóÂëÂÊBER=0.00000e+00
LTÂë£¬µ±Ç°¿ªÏú=1.60,µ±Ç°Ö¡ÊýÎª1000, ÎóÖ¡ÂÊPER=6.00000e-02,ÎóÂëÂÊBER=1.36000e-05
RaptorÂë£¬µ±Ç°¿ªÏú=1.60,µ±Ç°Ö¡ÊýÎª1000, ÎóÖ¡ÂÊPER=0.00000e+00,ÎóÂëÂÊBER=0.00000e+00
LTÂë£¬µ±Ç°¿ªÏú=1.60,µ±Ç°Ö¡ÊýÎª1100, ÎóÖ¡ÂÊPER=6.09091e-02,ÎóÂëÂÊBER=1.36364e-05
RaptorÂë£¬µ±Ç°¿ªÏú=1.60,µ±Ç°Ö¡ÊýÎª1100, ÎóÖ¡ÂÊPER=0.00000e+00,ÎóÂëÂÊBER=0.00000e+00
LTÂë£¬µ±Ç°¿ªÏú=1.60,µ±Ç°Ö¡ÊýÎª1200, ÎóÖ¡ÂÊPER=6.08333e-02,ÎóÂëÂÊBER=1.35000e-05
RaptorÂë£¬µ±Ç°¿ªÏú=1.60,µ±Ç°Ö¡ÊýÎª1200, ÎóÖ¡ÂÊPER=0.00000e+00,ÎóÂëÂÊBER=0.00000e+00
LTÂë£¬µ±Ç°¿ªÏú=1.60,µ±Ç°Ö¡ÊýÎª1300, ÎóÖ¡ÂÊPER=6.30769e-02,ÎóÂëÂÊBER=1.41538e-05
RaptorÂë£¬µ±Ç°¿ªÏú=1.60,µ±Ç°Ö¡ÊýÎª1300, ÎóÖ¡ÂÊPER=0.00000e+00,ÎóÂëÂÊBER=0.00000e+00
LTÂë£¬µ±Ç°¿ªÏú=1.60,µ±Ç°Ö¡ÊýÎª1400, ÎóÖ¡ÂÊPER=6.35714e-02,ÎóÂëÂÊBER=1.41429e-05
RaptorÂë£¬µ±Ç°¿ªÏú=1.60,µ±Ç°Ö¡ÊýÎª1400, ÎóÖ¡ÂÊPER=0.00000e+00,ÎóÂëÂÊBER=0.00000e+00
´íÎó±ÈÌØÊýºÍÖ¡Êý¶¼´ïµ½Ò»¶¨Á¿£¬ÐèÒªÔö¼Ó¿ªÏú
µ±Ç°ÐÅµÀ±ê×¼²î=100.00,¿ªÏú=1.60,µ±Ç°Ö¡ÊýÎª1408, LTÂëÎóÂëÂÊBER_LT=1.42045e-05,RaptorÎóÂëÂÊBER=0.00000e+00
LTÂë£¬µ±Ç°¿ªÏú=1.70,µ±Ç°Ö¡ÊýÎª100, ÎóÖ¡ÂÊPER=5.00000e-02,ÎóÂëÂÊBER=1.00000e-05
RaptorÂë£¬µ±Ç°¿ªÏú=1.70,µ±Ç°Ö¡ÊýÎª100, ÎóÖ¡ÂÊPER=0.00000e+00,ÎóÂëÂÊBER=0.00000e+00
LTÂë£¬µ±Ç°¿ªÏú=1.70,µ±Ç°Ö¡ÊýÎª200, ÎóÖ¡ÂÊPER=5.50000e-02,ÎóÂëÂÊBER=1.10000e-05
RaptorÂë£¬µ±Ç°¿ªÏú=1.70,µ±Ç°Ö¡ÊýÎª200, ÎóÖ¡ÂÊPER=0.00000e+00,ÎóÂëÂÊBER=0.00000e+00
LTÂë£¬µ±Ç°¿ªÏú=1.70,µ±Ç°Ö¡ÊýÎª300, ÎóÖ¡ÂÊPER=6.33333e-02,ÎóÂëÂÊBER=1.46667e-05
RaptorÂë£¬µ±Ç°¿ªÏú=1.70,µ±Ç°Ö¡ÊýÎª300, ÎóÖ¡ÂÊPER=0.00000e+00,ÎóÂëÂÊBER=0.00000e+00
LTÂë£¬µ±Ç°¿ªÏú=1.70,µ±Ç°Ö¡ÊýÎª400, ÎóÖ¡ÂÊPER=5.25000e-02,ÎóÂëÂÊBER=1.20000e-05
RaptorÂë£¬µ±Ç°¿ªÏú=1.70,µ±Ç°Ö¡ÊýÎª400, ÎóÖ¡ÂÊPER=0.00000e+00,ÎóÂëÂÊBER=0.00000e+00
LTÂë£¬µ±Ç°¿ªÏú=1.70,µ±Ç°Ö¡ÊýÎª500, ÎóÖ¡ÂÊPER=5.20000e-02,ÎóÂëÂÊBER=1.16000e-05
RaptorÂë£¬µ±Ç°¿ªÏú=1.70,µ±Ç°Ö¡ÊýÎª500, ÎóÖ¡ÂÊPER=0.00000e+00,ÎóÂëÂÊBER=0.00000e+00
LTÂë£¬µ±Ç°¿ªÏú=1.70,µ±Ç°Ö¡ÊýÎª600, ÎóÖ¡ÂÊPER=5.16667e-02,ÎóÂëÂÊBER=1.16667e-05
RaptorÂë£¬µ±Ç°¿ªÏú=1.70,µ±Ç°Ö¡ÊýÎª600, ÎóÖ¡ÂÊPER=0.00000e+00,ÎóÂëÂÊBER=0.00000e+00
LTÂë£¬µ±Ç°¿ªÏú=1.70,µ±Ç°Ö¡ÊýÎª700, ÎóÖ¡ÂÊPER=4.71429e-02,ÎóÂëÂÊBER=1.05714e-05
RaptorÂë£¬µ±Ç°¿ªÏú=1.70,µ±Ç°Ö¡ÊýÎª700, ÎóÖ¡ÂÊPER=0.00000e+00,ÎóÂëÂÊBER=0.00000e+00
LTÂë£¬µ±Ç°¿ªÏú=1.70,µ±Ç°Ö¡ÊýÎª800, ÎóÖ¡ÂÊPER=4.37500e-02,ÎóÂëÂÊBER=9.75000e-06
RaptorÂë£¬µ±Ç°¿ªÏú=1.70,µ±Ç°Ö¡ÊýÎª800, ÎóÖ¡ÂÊPER=0.00000e+00,ÎóÂëÂÊBER=0.00000e+00
LTÂë£¬µ±Ç°¿ªÏú=1.70,µ±Ç°Ö¡ÊýÎª900, ÎóÖ¡ÂÊPER=4.55556e-02,ÎóÂëÂÊBER=1.06667e-05
RaptorÂë£¬µ±Ç°¿ªÏú=1.70,µ±Ç°Ö¡ÊýÎª900, ÎóÖ¡ÂÊPER=0.00000e+00,ÎóÂëÂÊBER=0.00000e+00
LTÂë£¬µ±Ç°¿ªÏú=1.70,µ±Ç°Ö¡ÊýÎª1000, ÎóÖ¡ÂÊPER=4.40000e-02,ÎóÂëÂÊBER=1.02000e-05
RaptorÂë£¬µ±Ç°¿ªÏú=1.70,µ±Ç°Ö¡ÊýÎª1000, ÎóÖ¡ÂÊPER=0.00000e+00,ÎóÂëÂÊBER=0.00000e+00
LTÂë£¬µ±Ç°¿ªÏú=1.70,µ±Ç°Ö¡ÊýÎª1100, ÎóÖ¡ÂÊPER=4.27273e-02,ÎóÂëÂÊBER=1.00000e-05
RaptorÂë£¬µ±Ç°¿ªÏú=1.70,µ±Ç°Ö¡ÊýÎª1100, ÎóÖ¡ÂÊPER=0.00000e+00,ÎóÂëÂÊBER=0.00000e+00
LTÂë£¬µ±Ç°¿ªÏú=1.70,µ±Ç°Ö¡ÊýÎª1200, ÎóÖ¡ÂÊPER=4.50000e-02,ÎóÂëÂÊBER=1.03333e-05
RaptorÂë£¬µ±Ç°¿ªÏú=1.70,µ±Ç°Ö¡ÊýÎª1200, ÎóÖ¡ÂÊPER=0.00000e+00,ÎóÂëÂÊBER=0.00000e+00
LTÂë£¬µ±Ç°¿ªÏú=1.70,µ±Ç°Ö¡ÊýÎª1300, ÎóÖ¡ÂÊPER=4.46154e-02,ÎóÂëÂÊBER=1.01538e-05
RaptorÂë£¬µ±Ç°¿ªÏú=1.70,µ±Ç°Ö¡ÊýÎª1300, ÎóÖ¡ÂÊPER=0.00000e+00,ÎóÂëÂÊBER=0.00000e+00
LTÂë£¬µ±Ç°¿ªÏú=1.70,µ±Ç°Ö¡ÊýÎª1400, ÎóÖ¡ÂÊPER=4.57143e-02,ÎóÂëÂÊBER=1.02857e-05
RaptorÂë£¬µ±Ç°¿ªÏú=1.70,µ±Ç°Ö¡ÊýÎª1400, ÎóÖ¡ÂÊPER=0.00000e+00,ÎóÂëÂÊBER=0.00000e+00
LTÂë£¬µ±Ç°¿ªÏú=1.70,µ±Ç°Ö¡ÊýÎª1500, ÎóÖ¡ÂÊPER=4.40000e-02,ÎóÂëÂÊBER=1.00000e-05
RaptorÂë£¬µ±Ç°¿ªÏú=1.70,µ±Ç°Ö¡ÊýÎª1500, ÎóÖ¡ÂÊPER=0.00000e+00,ÎóÂëÂÊBER=0.00000e+00
LTÂë£¬µ±Ç°¿ªÏú=1.70,µ±Ç°Ö¡ÊýÎª1600, ÎóÖ¡ÂÊPER=4.56250e-02,ÎóÂëÂÊBER=1.02500e-05
RaptorÂë£¬µ±Ç°¿ªÏú=1.70,µ±Ç°Ö¡ÊýÎª1600, ÎóÖ¡ÂÊPER=0.00000e+00,ÎóÂëÂÊBER=0.00000e+00
LTÂë£¬µ±Ç°¿ªÏú=1.70,µ±Ç°Ö¡ÊýÎª1700, ÎóÖ¡ÂÊPER=4.58824e-02,ÎóÂëÂÊBER=1.02353e-05
RaptorÂë£¬µ±Ç°¿ªÏú=1.70,µ±Ç°Ö¡ÊýÎª1700, ÎóÖ¡ÂÊPER=0.00000e+00,ÎóÂëÂÊBER=0.00000e+00
LTÂë£¬µ±Ç°¿ªÏú=1.70,µ±Ç°Ö¡ÊýÎª1800, ÎóÖ¡ÂÊPER=4.66667e-02,ÎóÂëÂÊBER=1.03333e-05
RaptorÂë£¬µ±Ç°¿ªÏú=1.70,µ±Ç°Ö¡ÊýÎª1800, ÎóÖ¡ÂÊPER=0.00000e+00,ÎóÂëÂÊBER=0.00000e+00
LTÂë£¬µ±Ç°¿ªÏú=1.70,µ±Ç°Ö¡ÊýÎª1900, ÎóÖ¡ÂÊPER=4.63158e-02,ÎóÂëÂÊBER=1.02105e-05
RaptorÂë£¬µ±Ç°¿ªÏú=1.70,µ±Ç°Ö¡ÊýÎª1900, ÎóÖ¡ÂÊPER=0.00000e+00,ÎóÂëÂÊBER=0.00000e+00
´íÎó±ÈÌØÊýºÍÖ¡Êý¶¼´ïµ½Ò»¶¨Á¿£¬ÐèÒªÔö¼Ó¿ªÏú
µ±Ç°ÐÅµÀ±ê×¼²î=100.00,¿ªÏú=1.70,µ±Ç°Ö¡ÊýÎª1934, LTÂëÎóÂëÂÊBER_LT=1.03413e-05,RaptorÎóÂëÂÊBER=0.00000e+00
LTÂë£¬µ±Ç°¿ªÏú=1.80,µ±Ç°Ö¡ÊýÎª100, ÎóÖ¡ÂÊPER=2.00000e-02,ÎóÂëÂÊBER=4.00000e-06
RaptorÂë£¬µ±Ç°¿ªÏú=1.80,µ±Ç°Ö¡ÊýÎª100, ÎóÖ¡ÂÊPER=0.00000e+00,ÎóÂëÂÊBER=0.00000e+00
LTÂë£¬µ±Ç°¿ªÏú=1.80,µ±Ç°Ö¡ÊýÎª200, ÎóÖ¡ÂÊPER=4.00000e-02,ÎóÂëÂÊBER=1.00000e-05
RaptorÂë£¬µ±Ç°¿ªÏú=1.80,µ±Ç°Ö¡ÊýÎª200, ÎóÖ¡ÂÊPER=0.00000e+00,ÎóÂëÂÊBER=0.00000e+00
LTÂë£¬µ±Ç°¿ªÏú=1.80,µ±Ç°Ö¡ÊýÎª300, ÎóÖ¡ÂÊPER=4.33333e-02,ÎóÂëÂÊBER=1.00000e-05
RaptorÂë£¬µ±Ç°¿ªÏú=1.80,µ±Ç°Ö¡ÊýÎª300, ÎóÖ¡ÂÊPER=0.00000e+00,ÎóÂëÂÊBER=0.00000e+00
LTÂë£¬µ±Ç°¿ªÏú=1.80,µ±Ç°Ö¡ÊýÎª400, ÎóÖ¡ÂÊPER=3.75000e-02,ÎóÂëÂÊBER=9.00000e-06
RaptorÂë£¬µ±Ç°¿ªÏú=1.80,µ±Ç°Ö¡ÊýÎª400, ÎóÖ¡ÂÊPER=0.00000e+00,ÎóÂëÂÊBER=0.00000e+00
LTÂë£¬µ±Ç°¿ªÏú=1.80,µ±Ç°Ö¡ÊýÎª500, ÎóÖ¡ÂÊPER=4.20000e-02,ÎóÂëÂÊBER=1.00000e-05
RaptorÂë£¬µ±Ç°¿ªÏú=1.80,µ±Ç°Ö¡ÊýÎª500, ÎóÖ¡ÂÊPER=0.00000e+00,ÎóÂëÂÊBER=0.00000e+00
LTÂë£¬µ±Ç°¿ªÏú=1.80,µ±Ç°Ö¡ÊýÎª600, ÎóÖ¡ÂÊPER=4.00000e-02,ÎóÂëÂÊBER=9.33333e-06
RaptorÂë£¬µ±Ç°¿ªÏú=1.80,µ±Ç°Ö¡ÊýÎª600, ÎóÖ¡ÂÊPER=0.00000e+00,ÎóÂëÂÊBER=0.00000e+00
LTÂë£¬µ±Ç°¿ªÏú=1.80,µ±Ç°Ö¡ÊýÎª700, ÎóÖ¡ÂÊPER=3.57143e-02,ÎóÂëÂÊBER=8.28571e-06
RaptorÂë£¬µ±Ç°¿ªÏú=1.80,µ±Ç°Ö¡ÊýÎª700, ÎóÖ¡ÂÊPER=0.00000e+00,ÎóÂëÂÊBER=0.00000e+00
LTÂë£¬µ±Ç°¿ªÏú=1.80,µ±Ç°Ö¡ÊýÎª800, ÎóÖ¡ÂÊPER=3.87500e-02,ÎóÂëÂÊBER=8.75000e-06
RaptorÂë£¬µ±Ç°¿ªÏú=1.80,µ±Ç°Ö¡ÊýÎª800, ÎóÖ¡ÂÊPER=0.00000e+00,ÎóÂëÂÊBER=0.00000e+00
LTÂë£¬µ±Ç°¿ªÏú=1.80,µ±Ç°Ö¡ÊýÎª900, ÎóÖ¡ÂÊPER=4.00000e-02,ÎóÂëÂÊBER=8.88889e-06
RaptorÂë£¬µ±Ç°¿ªÏú=1.80,µ±Ç°Ö¡ÊýÎª900, ÎóÖ¡ÂÊPER=0.00000e+00,ÎóÂëÂÊBER=0.00000e+00
LTÂë£¬µ±Ç°¿ªÏú=1.80,µ±Ç°Ö¡ÊýÎª1000, ÎóÖ¡ÂÊPER=3.90000e-02,ÎóÂëÂÊBER=8.60000e-06
RaptorÂë£¬µ±Ç°¿ªÏú=1.80,µ±Ç°Ö¡ÊýÎª1000, ÎóÖ¡ÂÊPER=0.00000e+00,ÎóÂëÂÊBER=0.00000e+00
LTÂë£¬µ±Ç°¿ªÏú=1.80,µ±Ç°Ö¡ÊýÎª1100, ÎóÖ¡ÂÊPER=3.63636e-02,ÎóÂëÂÊBER=8.00000e-06
RaptorÂë£¬µ±Ç°¿ªÏú=1.80,µ±Ç°Ö¡ÊýÎª1100, ÎóÖ¡ÂÊPER=0.00000e+00,ÎóÂëÂÊBER=0.00000e+00
LTÂë£¬µ±Ç°¿ªÏú=1.80,µ±Ç°Ö¡ÊýÎª1200, ÎóÖ¡ÂÊPER=3.50000e-02,ÎóÂëÂÊBER=7.66667e-06
RaptorÂë£¬µ±Ç°¿ªÏú=1.80,µ±Ç°Ö¡ÊýÎª1200, ÎóÖ¡ÂÊPER=0.00000e+00,ÎóÂëÂÊBER=0.00000e+00
LTÂë£¬µ±Ç°¿ªÏú=1.80,µ±Ç°Ö¡ÊýÎª1300, ÎóÖ¡ÂÊPER=3.46154e-02,ÎóÂëÂÊBER=7.53846e-06
RaptorÂë£¬µ±Ç°¿ªÏú=1.80,µ±Ç°Ö¡ÊýÎª1300, ÎóÖ¡ÂÊPER=0.00000e+00,ÎóÂëÂÊBER=0.00000e+00
LTÂë£¬µ±Ç°¿ªÏú=1.80,µ±Ç°Ö¡ÊýÎª1400, ÎóÖ¡ÂÊPER=3.42857e-02,ÎóÂëÂÊBER=7.42857e-06
RaptorÂë£¬µ±Ç°¿ªÏú=1.80,µ±Ç°Ö¡ÊýÎª1400, ÎóÖ¡ÂÊPER=0.00000e+00,ÎóÂëÂÊBER=0.00000e+00
LTÂë£¬µ±Ç°¿ªÏú=1.80,µ±Ç°Ö¡ÊýÎª1500, ÎóÖ¡ÂÊPER=3.46667e-02,ÎóÂëÂÊBER=7.46667e-06
RaptorÂë£¬µ±Ç°¿ªÏú=1.80,µ±Ç°Ö¡ÊýÎª1500, ÎóÖ¡ÂÊPER=0.00000e+00,ÎóÂëÂÊBER=0.00000e+00
LTÂë£¬µ±Ç°¿ªÏú=1.80,µ±Ç°Ö¡ÊýÎª1600, ÎóÖ¡ÂÊPER=3.43750e-02,ÎóÂëÂÊBER=7.37500e-06
RaptorÂë£¬µ±Ç°¿ªÏú=1.80,µ±Ç°Ö¡ÊýÎª1600, ÎóÖ¡ÂÊPER=0.00000e+00,ÎóÂëÂÊBER=0.00000e+00
LTÂë£¬µ±Ç°¿ªÏú=1.80,µ±Ç°Ö¡ÊýÎª1700, ÎóÖ¡ÂÊPER=3.41176e-02,ÎóÂëÂÊBER=7.29412e-06
RaptorÂë£¬µ±Ç°¿ªÏú=1.80,µ±Ç°Ö¡ÊýÎª1700, ÎóÖ¡ÂÊPER=0.00000e+00,ÎóÂëÂÊBER=0.00000e+00
LTÂë£¬µ±Ç°¿ªÏú=1.80,µ±Ç°Ö¡ÊýÎª1800, ÎóÖ¡ÂÊPER=3.38889e-02,ÎóÂëÂÊBER=7.22222e-06
RaptorÂë£¬µ±Ç°¿ªÏú=1.80,µ±Ç°Ö¡ÊýÎª1800, ÎóÖ¡ÂÊPER=0.00000e+00,ÎóÂëÂÊBER=0.00000e+00
LTÂë£¬µ±Ç°¿ªÏú=1.80,µ±Ç°Ö¡ÊýÎª1900, ÎóÖ¡ÂÊPER=3.31579e-02,ÎóÂëÂÊBER=7.05263e-06
RaptorÂë£¬µ±Ç°¿ªÏú=1.80,µ±Ç°Ö¡ÊýÎª1900, ÎóÖ¡ÂÊPER=0.00000e+00,ÎóÂëÂÊBER=0.00000e+00
LTÂë£¬µ±Ç°¿ªÏú=1.80,µ±Ç°Ö¡ÊýÎª2000, ÎóÖ¡ÂÊPER=3.40000e-02,ÎóÂëÂÊBER=7.20000e-06
RaptorÂë£¬µ±Ç°¿ªÏú=1.80,µ±Ç°Ö¡ÊýÎª2000, ÎóÖ¡ÂÊPER=0.00000e+00,ÎóÂëÂÊBER=0.00000e+00
LTÂë£¬µ±Ç°¿ªÏú=1.80,µ±Ç°Ö¡ÊýÎª2100, ÎóÖ¡ÂÊPER=3.47619e-02,ÎóÂëÂÊBER=7.42857e-06
RaptorÂë£¬µ±Ç°¿ªÏú=1.80,µ±Ç°Ö¡ÊýÎª2100, ÎóÖ¡ÂÊPER=0.00000e+00,ÎóÂëÂÊBER=0.00000e+00
LTÂë£¬µ±Ç°¿ªÏú=1.80,µ±Ç°Ö¡ÊýÎª2200, ÎóÖ¡ÂÊPER=3.40909e-02,ÎóÂëÂÊBER=7.27273e-06
RaptorÂë£¬µ±Ç°¿ªÏú=1.80,µ±Ç°Ö¡ÊýÎª2200, ÎóÖ¡ÂÊPER=0.00000e+00,ÎóÂëÂÊBER=0.00000e+00
LTÂë£¬µ±Ç°¿ªÏú=1.80,µ±Ç°Ö¡ÊýÎª2300, ÎóÖ¡ÂÊPER=3.39130e-02,ÎóÂëÂÊBER=7.21739e-06
RaptorÂë£¬µ±Ç°¿ªÏú=1.80,µ±Ç°Ö¡ÊýÎª2300, ÎóÖ¡ÂÊPER=0.00000e+00,ÎóÂëÂÊBER=0.00000e+00
LTÂë£¬µ±Ç°¿ªÏú=1.80,µ±Ç°Ö¡ÊýÎª2400, ÎóÖ¡ÂÊPER=3.37500e-02,ÎóÂëÂÊBER=7.16667e-06
RaptorÂë£¬µ±Ç°¿ªÏú=1.80,µ±Ç°Ö¡ÊýÎª2400, ÎóÖ¡ÂÊPER=0.00000e+00,ÎóÂëÂÊBER=0.00000e+00
LTÂë£¬µ±Ç°¿ªÏú=1.80,µ±Ç°Ö¡ÊýÎª2500, ÎóÖ¡ÂÊPER=3.36000e-02,ÎóÂëÂÊBER=7.12000e-06
RaptorÂë£¬µ±Ç°¿ªÏú=1.80,µ±Ç°Ö¡ÊýÎª2500, ÎóÖ¡ÂÊPER=0.00000e+00,ÎóÂëÂÊBER=0.00000e+00
LTÂë£¬µ±Ç°¿ªÏú=1.80,µ±Ç°Ö¡ÊýÎª2600, ÎóÖ¡ÂÊPER=3.23077e-02,ÎóÂëÂÊBER=6.84615e-06
RaptorÂë£¬µ±Ç°¿ªÏú=1.80,µ±Ç°Ö¡ÊýÎª2600, ÎóÖ¡ÂÊPER=0.00000e+00,ÎóÂëÂÊBER=0.00000e+00
LTÂë£¬µ±Ç°¿ªÏú=1.80,µ±Ç°Ö¡ÊýÎª2700, ÎóÖ¡ÂÊPER=3.40741e-02,ÎóÂëÂÊBER=7.18519e-06
RaptorÂë£¬µ±Ç°¿ªÏú=1.80,µ±Ç°Ö¡ÊýÎª2700, ÎóÖ¡ÂÊPER=0.00000e+00,ÎóÂëÂÊBER=0.00000e+00
LTÂë£¬µ±Ç°¿ªÏú=1.80,µ±Ç°Ö¡ÊýÎª2800, ÎóÖ¡ÂÊPER=3.32143e-02,ÎóÂëÂÊBER=7.00000e-06
RaptorÂë£¬µ±Ç°¿ªÏú=1.80,µ±Ç°Ö¡ÊýÎª2800, ÎóÖ¡ÂÊPER=0.00000e+00,ÎóÂëÂÊBER=0.00000e+00
´íÎó±ÈÌØÊýºÍÖ¡Êý¶¼´ïµ½Ò»¶¨Á¿£¬ÐèÒªÔö¼Ó¿ªÏú
µ±Ç°ÐÅµÀ±ê×¼²î=100.00,¿ªÏú=1.80,µ±Ç°Ö¡ÊýÎª2859, LTÂëÎóÂëÂÊBER_LT=6.99545e-06,RaptorÎóÂëÂÊBER=0.00000e+00
LTÂë£¬µ±Ç°¿ªÏú=1.90,µ±Ç°Ö¡ÊýÎª100, ÎóÖ¡ÂÊPER=4.00000e-02,ÎóÂëÂÊBER=8.00000e-06
RaptorÂë£¬µ±Ç°¿ªÏú=1.90,µ±Ç°Ö¡ÊýÎª100, ÎóÖ¡ÂÊPER=0.00000e+00,ÎóÂëÂÊBER=0.00000e+00
LTÂë£¬µ±Ç°¿ªÏú=1.90,µ±Ç°Ö¡ÊýÎª200, ÎóÖ¡ÂÊPER=3.50000e-02,ÎóÂëÂÊBER=7.00000e-06
RaptorÂë£¬µ±Ç°¿ªÏú=1.90,µ±Ç°Ö¡ÊýÎª200, ÎóÖ¡ÂÊPER=0.00000e+00,ÎóÂëÂÊBER=0.00000e+00
LTÂë£¬µ±Ç°¿ªÏú=1.90,µ±Ç°Ö¡ÊýÎª300, ÎóÖ¡ÂÊPER=3.33333e-02,ÎóÂëÂÊBER=6.66667e-06
RaptorÂë£¬µ±Ç°¿ªÏú=1.90,µ±Ç°Ö¡ÊýÎª300, ÎóÖ¡ÂÊPER=0.00000e+00,ÎóÂëÂÊBER=0.00000e+00
LTÂë£¬µ±Ç°¿ªÏú=1.90,µ±Ç°Ö¡ÊýÎª400, ÎóÖ¡ÂÊPER=3.00000e-02,ÎóÂëÂÊBER=6.00000e-06
RaptorÂë£¬µ±Ç°¿ªÏú=1.90,µ±Ç°Ö¡ÊýÎª400, ÎóÖ¡ÂÊPER=0.00000e+00,ÎóÂëÂÊBER=0.00000e+00
LTÂë£¬µ±Ç°¿ªÏú=1.90,µ±Ç°Ö¡ÊýÎª500, ÎóÖ¡ÂÊPER=3.20000e-02,ÎóÂëÂÊBER=6.40000e-06
RaptorÂë£¬µ±Ç°¿ªÏú=1.90,µ±Ç°Ö¡ÊýÎª500, ÎóÖ¡ÂÊPER=0.00000e+00,ÎóÂëÂÊBER=0.00000e+00
LTÂë£¬µ±Ç°¿ªÏú=1.90,µ±Ç°Ö¡ÊýÎª600, ÎóÖ¡ÂÊPER=3.16667e-02,ÎóÂëÂÊBER=6.33333e-06
RaptorÂë£¬µ±Ç°¿ªÏú=1.90,µ±Ç°Ö¡ÊýÎª600, ÎóÖ¡ÂÊPER=0.00000e+00,ÎóÂëÂÊBER=0.00000e+00
LTÂë£¬µ±Ç°¿ªÏú=1.90,µ±Ç°Ö¡ÊýÎª700, ÎóÖ¡ÂÊPER=3.14286e-02,ÎóÂëÂÊBER=6.28571e-06
RaptorÂë£¬µ±Ç°¿ªÏú=1.90,µ±Ç°Ö¡ÊýÎª700, ÎóÖ¡ÂÊPER=0.00000e+00,ÎóÂëÂÊBER=0.00000e+00
LTÂë£¬µ±Ç°¿ªÏú=1.90,µ±Ç°Ö¡ÊýÎª800, ÎóÖ¡ÂÊPER=2.87500e-02,ÎóÂëÂÊBER=5.75000e-06
RaptorÂë£¬µ±Ç°¿ªÏú=1.90,µ±Ç°Ö¡ÊýÎª800, ÎóÖ¡ÂÊPER=0.00000e+00,ÎóÂëÂÊBER=0.00000e+00
LTÂë£¬µ±Ç°¿ªÏú=1.90,µ±Ç°Ö¡ÊýÎª900, ÎóÖ¡ÂÊPER=2.66667e-02,ÎóÂëÂÊBER=5.33333e-06
RaptorÂë£¬µ±Ç°¿ªÏú=1.90,µ±Ç°Ö¡ÊýÎª900, ÎóÖ¡ÂÊPER=0.00000e+00,ÎóÂëÂÊBER=0.00000e+00
LTÂë£¬µ±Ç°¿ªÏú=1.90,µ±Ç°Ö¡ÊýÎª1000, ÎóÖ¡ÂÊPER=2.40000e-02,ÎóÂëÂÊBER=4.80000e-06
RaptorÂë£¬µ±Ç°¿ªÏú=1.90,µ±Ç°Ö¡ÊýÎª1000, ÎóÖ¡ÂÊPER=0.00000e+00,ÎóÂëÂÊBER=0.00000e+00
LTÂë£¬µ±Ç°¿ªÏú=1.90,µ±Ç°Ö¡ÊýÎª1100, ÎóÖ¡ÂÊPER=2.36364e-02,ÎóÂëÂÊBER=4.72727e-06
RaptorÂë£¬µ±Ç°¿ªÏú=1.90,µ±Ç°Ö¡ÊýÎª1100, ÎóÖ¡ÂÊPER=0.00000e+00,ÎóÂëÂÊBER=0.00000e+00
LTÂë£¬µ±Ç°¿ªÏú=1.90,µ±Ç°Ö¡ÊýÎª1200, ÎóÖ¡ÂÊPER=2.41667e-02,ÎóÂëÂÊBER=4.83333e-06
RaptorÂë£¬µ±Ç°¿ªÏú=1.90,µ±Ç°Ö¡ÊýÎª1200, ÎóÖ¡ÂÊPER=0.00000e+00,ÎóÂëÂÊBER=0.00000e+00
LTÂë£¬µ±Ç°¿ªÏú=1.90,µ±Ç°Ö¡ÊýÎª1300, ÎóÖ¡ÂÊPER=2.30769e-02,ÎóÂëÂÊBER=4.61538e-06
RaptorÂë£¬µ±Ç°¿ªÏú=1.90,µ±Ç°Ö¡ÊýÎª1300, ÎóÖ¡ÂÊPER=0.00000e+00,ÎóÂëÂÊBER=0.00000e+00
LTÂë£¬µ±Ç°¿ªÏú=1.90,µ±Ç°Ö¡ÊýÎª1400, ÎóÖ¡ÂÊPER=2.28571e-02,ÎóÂëÂÊBER=4.57143e-06
RaptorÂë£¬µ±Ç°¿ªÏú=1.90,µ±Ç°Ö¡ÊýÎª1400, ÎóÖ¡ÂÊPER=0.00000e+00,ÎóÂëÂÊBER=0.00000e+00
LTÂë£¬µ±Ç°¿ªÏú=1.90,µ±Ç°Ö¡ÊýÎª1500, ÎóÖ¡ÂÊPER=2.26667e-02,ÎóÂëÂÊBER=4.53333e-06
RaptorÂë£¬µ±Ç°¿ªÏú=1.90,µ±Ç°Ö¡ÊýÎª1500, ÎóÖ¡ÂÊPER=0.00000e+00,ÎóÂëÂÊBER=0.00000e+00
LTÂë£¬µ±Ç°¿ªÏú=1.90,µ±Ç°Ö¡ÊýÎª1600, ÎóÖ¡ÂÊPER=2.12500e-02,ÎóÂëÂÊBER=4.25000e-06
RaptorÂë£¬µ±Ç°¿ªÏú=1.90,µ±Ç°Ö¡ÊýÎª1600, ÎóÖ¡ÂÊPER=0.00000e+00,ÎóÂëÂÊBER=0.00000e+00
LTÂë£¬µ±Ç°¿ªÏú=1.90,µ±Ç°Ö¡ÊýÎª1700, ÎóÖ¡ÂÊPER=2.11765e-02,ÎóÂëÂÊBER=4.23529e-06
RaptorÂë£¬µ±Ç°¿ªÏú=1.90,µ±Ç°Ö¡ÊýÎª1700, ÎóÖ¡ÂÊPER=0.00000e+00,ÎóÂëÂÊBER=0.00000e+00
LTÂë£¬µ±Ç°¿ªÏú=1.90,µ±Ç°Ö¡ÊýÎª1800, ÎóÖ¡ÂÊPER=2.16667e-02,ÎóÂëÂÊBER=4.33333e-06
RaptorÂë£¬µ±Ç°¿ªÏú=1.90,µ±Ç°Ö¡ÊýÎª1800, ÎóÖ¡ÂÊPER=0.00000e+00,ÎóÂëÂÊBER=0.00000e+00
LTÂë£¬µ±Ç°¿ªÏú=1.90,µ±Ç°Ö¡ÊýÎª1900, ÎóÖ¡ÂÊPER=2.10526e-02,ÎóÂëÂÊBER=4.21053e-06
RaptorÂë£¬µ±Ç°¿ªÏú=1.90,µ±Ç°Ö¡ÊýÎª1900, ÎóÖ¡ÂÊPER=0.00000e+00,ÎóÂëÂÊBER=0.00000e+00
LTÂë£¬µ±Ç°¿ªÏú=1.90,µ±Ç°Ö¡ÊýÎª2000, ÎóÖ¡ÂÊPER=2.00000e-02,ÎóÂëÂÊBER=4.00000e-06
RaptorÂë£¬µ±Ç°¿ªÏú=1.90,µ±Ç°Ö¡ÊýÎª2000, ÎóÖ¡ÂÊPER=0.00000e+00,ÎóÂëÂÊBER=0.00000e+00
LTÂë£¬µ±Ç°¿ªÏú=1.90,µ±Ç°Ö¡ÊýÎª2100, ÎóÖ¡ÂÊPER=2.00000e-02,ÎóÂëÂÊBER=4.00000e-06
RaptorÂë£¬µ±Ç°¿ªÏú=1.90,µ±Ç°Ö¡ÊýÎª2100, ÎóÖ¡ÂÊPER=0.00000e+00,ÎóÂëÂÊBER=0.00000e+00
LTÂë£¬µ±Ç°¿ªÏú=1.90,µ±Ç°Ö¡ÊýÎª2200, ÎóÖ¡ÂÊPER=2.00000e-02,ÎóÂëÂÊBER=4.00000e-06
RaptorÂë£¬µ±Ç°¿ªÏú=1.90,µ±Ç°Ö¡ÊýÎª2200, ÎóÖ¡ÂÊPER=0.00000e+00,ÎóÂëÂÊBER=0.00000e+00
LTÂë£¬µ±Ç°¿ªÏú=1.90,µ±Ç°Ö¡ÊýÎª2300, ÎóÖ¡ÂÊPER=1.95652e-02,ÎóÂëÂÊBER=3.91304e-06
RaptorÂë£¬µ±Ç°¿ªÏú=1.90,µ±Ç°Ö¡ÊýÎª2300, ÎóÖ¡ÂÊPER=0.00000e+00,ÎóÂëÂÊBER=0.00000e+00
LTÂë£¬µ±Ç°¿ªÏú=1.90,µ±Ç°Ö¡ÊýÎª2400, ÎóÖ¡ÂÊPER=1.91667e-02,ÎóÂëÂÊBER=3.83333e-06
RaptorÂë£¬µ±Ç°¿ªÏú=1.90,µ±Ç°Ö¡ÊýÎª2400, ÎóÖ¡ÂÊPER=0.00000e+00,ÎóÂëÂÊBER=0.00000e+00
LTÂë£¬µ±Ç°¿ªÏú=1.90,µ±Ç°Ö¡ÊýÎª2500, ÎóÖ¡ÂÊPER=1.88000e-02,ÎóÂëÂÊBER=3.76000e-06
RaptorÂë£¬µ±Ç°¿ªÏú=1.90,µ±Ç°Ö¡ÊýÎª2500, ÎóÖ¡ÂÊPER=0.00000e+00,ÎóÂëÂÊBER=0.00000e+00
LTÂë£¬µ±Ç°¿ªÏú=1.90,µ±Ç°Ö¡ÊýÎª2600, ÎóÖ¡ÂÊPER=1.84615e-02,ÎóÂëÂÊBER=3.69231e-06
RaptorÂë£¬µ±Ç°¿ªÏú=1.90,µ±Ç°Ö¡ÊýÎª2600, ÎóÖ¡ÂÊPER=0.00000e+00,ÎóÂëÂÊBER=0.00000e+00
LTÂë£¬µ±Ç°¿ªÏú=1.90,µ±Ç°Ö¡ÊýÎª2700, ÎóÖ¡ÂÊPER=1.81481e-02,ÎóÂëÂÊBER=3.62963e-06
RaptorÂë£¬µ±Ç°¿ªÏú=1.90,µ±Ç°Ö¡ÊýÎª2700, ÎóÖ¡ÂÊPER=0.00000e+00,ÎóÂëÂÊBER=0.00000e+00
LTÂë£¬µ±Ç°¿ªÏú=1.90,µ±Ç°Ö¡ÊýÎª2800, ÎóÖ¡ÂÊPER=1.82143e-02,ÎóÂëÂÊBER=3.64286e-06
RaptorÂë£¬µ±Ç°¿ªÏú=1.90,µ±Ç°Ö¡ÊýÎª2800, ÎóÖ¡ÂÊPER=0.00000e+00,ÎóÂëÂÊBER=0.00000e+00
LTÂë£¬µ±Ç°¿ªÏú=1.90,µ±Ç°Ö¡ÊýÎª2900, ÎóÖ¡ÂÊPER=1.82759e-02,ÎóÂëÂÊBER=3.72414e-06
RaptorÂë£¬µ±Ç°¿ªÏú=1.90,µ±Ç°Ö¡ÊýÎª2900, ÎóÖ¡ÂÊPER=0.00000e+00,ÎóÂëÂÊBER=0.00000e+00
LTÂë£¬µ±Ç°¿ªÏú=1.90,µ±Ç°Ö¡ÊýÎª3000, ÎóÖ¡ÂÊPER=1.80000e-02,ÎóÂëÂÊBER=3.66667e-06
RaptorÂë£¬µ±Ç°¿ªÏú=1.90,µ±Ç°Ö¡ÊýÎª3000, ÎóÖ¡ÂÊPER=0.00000e+00,ÎóÂëÂÊBER=0.00000e+00
LTÂë£¬µ±Ç°¿ªÏú=1.90,µ±Ç°Ö¡ÊýÎª3100, ÎóÖ¡ÂÊPER=1.87097e-02,ÎóÂëÂÊBER=3.80645e-06
RaptorÂë£¬µ±Ç°¿ªÏú=1.90,µ±Ç°Ö¡ÊýÎª3100, ÎóÖ¡ÂÊPER=0.00000e+00,ÎóÂëÂÊBER=0.00000e+00
LTÂë£¬µ±Ç°¿ªÏú=1.90,µ±Ç°Ö¡ÊýÎª3200, ÎóÖ¡ÂÊPER=1.81250e-02,ÎóÂëÂÊBER=3.68750e-06
RaptorÂë£¬µ±Ç°¿ªÏú=1.90,µ±Ç°Ö¡ÊýÎª3200, ÎóÖ¡ÂÊPER=0.00000e+00,ÎóÂëÂÊBER=0.00000e+00
LTÂë£¬µ±Ç°¿ªÏú=1.90,µ±Ç°Ö¡ÊýÎª3300, ÎóÖ¡ÂÊPER=1.78788e-02,ÎóÂëÂÊBER=3.63636e-06
RaptorÂë£¬µ±Ç°¿ªÏú=1.90,µ±Ç°Ö¡ÊýÎª3300, ÎóÖ¡ÂÊPER=0.00000e+00,ÎóÂëÂÊBER=0.00000e+00
LTÂë£¬µ±Ç°¿ªÏú=1.90,µ±Ç°Ö¡ÊýÎª3400, ÎóÖ¡ÂÊPER=1.85294e-02,ÎóÂëÂÊBER=3.76471e-06
RaptorÂë£¬µ±Ç°¿ªÏú=1.90,µ±Ç°Ö¡ÊýÎª3400, ÎóÖ¡ÂÊPER=0.00000e+00,ÎóÂëÂÊBER=0.00000e+00
LTÂë£¬µ±Ç°¿ªÏú=1.90,µ±Ç°Ö¡ÊýÎª3500, ÎóÖ¡ÂÊPER=1.88571e-02,ÎóÂëÂÊBER=3.82857e-06
RaptorÂë£¬µ±Ç°¿ªÏú=1.90,µ±Ç°Ö¡ÊýÎª3500, ÎóÖ¡ÂÊPER=0.00000e+00,ÎóÂëÂÊBER=0.00000e+00
LTÂë£¬µ±Ç°¿ªÏú=1.90,µ±Ç°Ö¡ÊýÎª3600, ÎóÖ¡ÂÊPER=1.86111e-02,ÎóÂëÂÊBER=3.77778e-06
RaptorÂë£¬µ±Ç°¿ªÏú=1.90,µ±Ç°Ö¡ÊýÎª3600, ÎóÖ¡ÂÊPER=0.00000e+00,ÎóÂëÂÊBER=0.00000e+00
LTÂë£¬µ±Ç°¿ªÏú=1.90,µ±Ç°Ö¡ÊýÎª3700, ÎóÖ¡ÂÊPER=1.86486e-02,ÎóÂëÂÊBER=3.78378e-06
RaptorÂë£¬µ±Ç°¿ªÏú=1.90,µ±Ç°Ö¡ÊýÎª3700, ÎóÖ¡ÂÊPER=0.00000e+00,ÎóÂëÂÊBER=0.00000e+00
LTÂë£¬µ±Ç°¿ªÏú=1.90,µ±Ç°Ö¡ÊýÎª3800, ÎóÖ¡ÂÊPER=1.86842e-02,ÎóÂëÂÊBER=3.84211e-06
RaptorÂë£¬µ±Ç°¿ªÏú=1.90,µ±Ç°Ö¡ÊýÎª3800, ÎóÖ¡ÂÊPER=0.00000e+00,ÎóÂëÂÊBER=0.00000e+00
LTÂë£¬µ±Ç°¿ªÏú=1.90,µ±Ç°Ö¡ÊýÎª3900, ÎóÖ¡ÂÊPER=1.84615e-02,ÎóÂëÂÊBER=3.79487e-06
RaptorÂë£¬µ±Ç°¿ªÏú=1.90,µ±Ç°Ö¡ÊýÎª3900, ÎóÖ¡ÂÊPER=0.00000e+00,ÎóÂëÂÊBER=0.00000e+00
LTÂë£¬µ±Ç°¿ªÏú=1.90,µ±Ç°Ö¡ÊýÎª4000, ÎóÖ¡ÂÊPER=1.80000e-02,ÎóÂëÂÊBER=3.70000e-06
RaptorÂë£¬µ±Ç°¿ªÏú=1.90,µ±Ç°Ö¡ÊýÎª4000, ÎóÖ¡ÂÊPER=0.00000e+00,ÎóÂëÂÊBER=0.00000e+00
LTÂë£¬µ±Ç°¿ªÏú=1.90,µ±Ç°Ö¡ÊýÎª4100, ÎóÖ¡ÂÊPER=1.90244e-02,ÎóÂëÂÊBER=3.90244e-06
RaptorÂë£¬µ±Ç°¿ªÏú=1.90,µ±Ç°Ö¡ÊýÎª4100, ÎóÖ¡ÂÊPER=0.00000e+00,ÎóÂëÂÊBER=0.00000e+00
LTÂë£¬µ±Ç°¿ªÏú=1.90,µ±Ç°Ö¡ÊýÎª4200, ÎóÖ¡ÂÊPER=1.95238e-02,ÎóÂëÂÊBER=4.00000e-06
RaptorÂë£¬µ±Ç°¿ªÏú=1.90,µ±Ç°Ö¡ÊýÎª4200, ÎóÖ¡ÂÊPER=0.00000e+00,ÎóÂëÂÊBER=0.00000e+00
LTÂë£¬µ±Ç°¿ªÏú=1.90,µ±Ç°Ö¡ÊýÎª4300, ÎóÖ¡ÂÊPER=1.93023e-02,ÎóÂëÂÊBER=3.95349e-06
RaptorÂë£¬µ±Ç°¿ªÏú=1.90,µ±Ç°Ö¡ÊýÎª4300, ÎóÖ¡ÂÊPER=0.00000e+00,ÎóÂëÂÊBER=0.00000e+00
LTÂë£¬µ±Ç°¿ªÏú=1.90,µ±Ç°Ö¡ÊýÎª4400, ÎóÖ¡ÂÊPER=1.93182e-02,ÎóÂëÂÊBER=3.95455e-06
RaptorÂë£¬µ±Ç°¿ªÏú=1.90,µ±Ç°Ö¡ÊýÎª4400, ÎóÖ¡ÂÊPER=0.00000e+00,ÎóÂëÂÊBER=0.00000e+00
LTÂë£¬µ±Ç°¿ªÏú=1.90,µ±Ç°Ö¡ÊýÎª4500, ÎóÖ¡ÂÊPER=1.95556e-02,ÎóÂëÂÊBER=4.00000e-06
RaptorÂë£¬µ±Ç°¿ªÏú=1.90,µ±Ç°Ö¡ÊýÎª4500, ÎóÖ¡ÂÊPER=0.00000e+00,ÎóÂëÂÊBER=0.00000e+00
LTÂë£¬µ±Ç°¿ªÏú=1.90,µ±Ç°Ö¡ÊýÎª4600, ÎóÖ¡ÂÊPER=1.93478e-02,ÎóÂëÂÊBER=3.95652e-06
RaptorÂë£¬µ±Ç°¿ªÏú=1.90,µ±Ç°Ö¡ÊýÎª4600, ÎóÖ¡ÂÊPER=0.00000e+00,ÎóÂëÂÊBER=0.00000e+00
LTÂë£¬µ±Ç°¿ªÏú=1.90,µ±Ç°Ö¡ÊýÎª4700, ÎóÖ¡ÂÊPER=1.93617e-02,ÎóÂëÂÊBER=3.95745e-06
RaptorÂë£¬µ±Ç°¿ªÏú=1.90,µ±Ç°Ö¡ÊýÎª4700, ÎóÖ¡ÂÊPER=0.00000e+00,ÎóÂëÂÊBER=0.00000e+00
LTÂë£¬µ±Ç°¿ªÏú=1.90,µ±Ç°Ö¡ÊýÎª4800, ÎóÖ¡ÂÊPER=1.93750e-02,ÎóÂëÂÊBER=3.95833e-06
RaptorÂë£¬µ±Ç°¿ªÏú=1.90,µ±Ç°Ö¡ÊýÎª4800, ÎóÖ¡ÂÊPER=0.00000e+00,ÎóÂëÂÊBER=0.00000e+00
LTÂë£¬µ±Ç°¿ªÏú=1.90,µ±Ç°Ö¡ÊýÎª4900, ÎóÖ¡ÂÊPER=1.93878e-02,ÎóÂëÂÊBER=3.95918e-06
RaptorÂë£¬µ±Ç°¿ªÏú=1.90,µ±Ç°Ö¡ÊýÎª4900, ÎóÖ¡ÂÊPER=0.00000e+00,ÎóÂëÂÊBER=0.00000e+00
´íÎó±ÈÌØÊýºÍÖ¡Êý¶¼´ïµ½Ò»¶¨Á¿£¬ÐèÒªÔö¼Ó¿ªÏú
µ±Ç°ÐÅµÀ±ê×¼²î=100.00,¿ªÏú=1.90,µ±Ç°Ö¡ÊýÎª4944, LTÂëÎóÂëÂÊBER_LT=4.04531e-06,RaptorÎóÂëÂÊBER=0.00000e+00
LTÂë£¬µ±Ç°¿ªÏú=2.00,µ±Ç°Ö¡ÊýÎª100, ÎóÖ¡ÂÊPER=3.00000e-02,ÎóÂëÂÊBER=6.00000e-06
RaptorÂë£¬µ±Ç°¿ªÏú=2.00,µ±Ç°Ö¡ÊýÎª100, ÎóÖ¡ÂÊPER=0.00000e+00,ÎóÂëÂÊBER=0.00000e+00
LTÂë£¬µ±Ç°¿ªÏú=2.00,µ±Ç°Ö¡ÊýÎª200, ÎóÖ¡ÂÊPER=2.00000e-02,ÎóÂëÂÊBER=4.00000e-06
RaptorÂë£¬µ±Ç°¿ªÏú=2.00,µ±Ç°Ö¡ÊýÎª200, ÎóÖ¡ÂÊPER=0.00000e+00,ÎóÂëÂÊBER=0.00000e+00
LTÂë£¬µ±Ç°¿ªÏú=2.00,µ±Ç°Ö¡ÊýÎª300, ÎóÖ¡ÂÊPER=1.66667e-02,ÎóÂëÂÊBER=3.33333e-06
RaptorÂë£¬µ±Ç°¿ªÏú=2.00,µ±Ç°Ö¡ÊýÎª300, ÎóÖ¡ÂÊPER=0.00000e+00,ÎóÂëÂÊBER=0.00000e+00
LTÂë£¬µ±Ç°¿ªÏú=2.00,µ±Ç°Ö¡ÊýÎª400, ÎóÖ¡ÂÊPER=1.25000e-02,ÎóÂëÂÊBER=2.50000e-06
RaptorÂë£¬µ±Ç°¿ªÏú=2.00,µ±Ç°Ö¡ÊýÎª400, ÎóÖ¡ÂÊPER=0.00000e+00,ÎóÂëÂÊBER=0.00000e+00
LTÂë£¬µ±Ç°¿ªÏú=2.00,µ±Ç°Ö¡ÊýÎª500, ÎóÖ¡ÂÊPER=1.40000e-02,ÎóÂëÂÊBER=2.80000e-06
RaptorÂë£¬µ±Ç°¿ªÏú=2.00,µ±Ç°Ö¡ÊýÎª500, ÎóÖ¡ÂÊPER=0.00000e+00,ÎóÂëÂÊBER=0.00000e+00
LTÂë£¬µ±Ç°¿ªÏú=2.00,µ±Ç°Ö¡ÊýÎª600, ÎóÖ¡ÂÊPER=1.33333e-02,ÎóÂëÂÊBER=2.66667e-06
RaptorÂë£¬µ±Ç°¿ªÏú=2.00,µ±Ç°Ö¡ÊýÎª600, ÎóÖ¡ÂÊPER=0.00000e+00,ÎóÂëÂÊBER=0.00000e+00
LTÂë£¬µ±Ç°¿ªÏú=2.00,µ±Ç°Ö¡ÊýÎª700, ÎóÖ¡ÂÊPER=1.14286e-02,ÎóÂëÂÊBER=2.28571e-06
RaptorÂë£¬µ±Ç°¿ªÏú=2.00,µ±Ç°Ö¡ÊýÎª700, ÎóÖ¡ÂÊPER=0.00000e+00,ÎóÂëÂÊBER=0.00000e+00
LTÂë£¬µ±Ç°¿ªÏú=2.00,µ±Ç°Ö¡ÊýÎª800, ÎóÖ¡ÂÊPER=1.12500e-02,ÎóÂëÂÊBER=2.25000e-06
RaptorÂë£¬µ±Ç°¿ªÏú=2.00,µ±Ç°Ö¡ÊýÎª800, ÎóÖ¡ÂÊPER=0.00000e+00,ÎóÂëÂÊBER=0.00000e+00
LTÂë£¬µ±Ç°¿ªÏú=2.00,µ±Ç°Ö¡ÊýÎª900, ÎóÖ¡ÂÊPER=1.22222e-02,ÎóÂëÂÊBER=2.44444e-06
RaptorÂë£¬µ±Ç°¿ªÏú=2.00,µ±Ç°Ö¡ÊýÎª900, ÎóÖ¡ÂÊPER=0.00000e+00,ÎóÂëÂÊBER=0.00000e+00
LTÂë£¬µ±Ç°¿ªÏú=2.00,µ±Ç°Ö¡ÊýÎª1000, ÎóÖ¡ÂÊPER=1.30000e-02,ÎóÂëÂÊBER=2.60000e-06
RaptorÂë£¬µ±Ç°¿ªÏú=2.00,µ±Ç°Ö¡ÊýÎª1000, ÎóÖ¡ÂÊPER=0.00000e+00,ÎóÂëÂÊBER=0.00000e+00
LTÂë£¬µ±Ç°¿ªÏú=2.00,µ±Ç°Ö¡ÊýÎª1100, ÎóÖ¡ÂÊPER=1.27273e-02,ÎóÂëÂÊBER=2.54545e-06
RaptorÂë£¬µ±Ç°¿ªÏú=2.00,µ±Ç°Ö¡ÊýÎª1100, ÎóÖ¡ÂÊPER=0.00000e+00,ÎóÂëÂÊBER=0.00000e+00
LTÂë£¬µ±Ç°¿ªÏú=2.00,µ±Ç°Ö¡ÊýÎª1200, ÎóÖ¡ÂÊPER=1.33333e-02,ÎóÂëÂÊBER=2.66667e-06
RaptorÂë£¬µ±Ç°¿ªÏú=2.00,µ±Ç°Ö¡ÊýÎª1200, ÎóÖ¡ÂÊPER=0.00000e+00,ÎóÂëÂÊBER=0.00000e+00
LTÂë£¬µ±Ç°¿ªÏú=2.00,µ±Ç°Ö¡ÊýÎª1300, ÎóÖ¡ÂÊPER=1.38462e-02,ÎóÂëÂÊBER=2.76923e-06
RaptorÂë£¬µ±Ç°¿ªÏú=2.00,µ±Ç°Ö¡ÊýÎª1300, ÎóÖ¡ÂÊPER=0.00000e+00,ÎóÂëÂÊBER=0.00000e+00
LTÂë£¬µ±Ç°¿ªÏú=2.00,µ±Ç°Ö¡ÊýÎª1400, ÎóÖ¡ÂÊPER=1.35714e-02,ÎóÂëÂÊBER=2.71429e-06
RaptorÂë£¬µ±Ç°¿ªÏú=2.00,µ±Ç°Ö¡ÊýÎª1400, ÎóÖ¡ÂÊPER=0.00000e+00,ÎóÂëÂÊBER=0.00000e+00
LTÂë£¬µ±Ç°¿ªÏú=2.00,µ±Ç°Ö¡ÊýÎª1500, ÎóÖ¡ÂÊPER=1.40000e-02,ÎóÂëÂÊBER=2.80000e-06
RaptorÂë£¬µ±Ç°¿ªÏú=2.00,µ±Ç°Ö¡ÊýÎª1500, ÎóÖ¡ÂÊPER=0.00000e+00,ÎóÂëÂÊBER=0.00000e+00
LTÂë£¬µ±Ç°¿ªÏú=2.00,µ±Ç°Ö¡ÊýÎª1600, ÎóÖ¡ÂÊPER=1.31250e-02,ÎóÂëÂÊBER=2.62500e-06
RaptorÂë£¬µ±Ç°¿ªÏú=2.00,µ±Ç°Ö¡ÊýÎª1600, ÎóÖ¡ÂÊPER=0.00000e+00,ÎóÂëÂÊBER=0.00000e+00
LTÂë£¬µ±Ç°¿ªÏú=2.00,µ±Ç°Ö¡ÊýÎª1700, ÎóÖ¡ÂÊPER=1.29412e-02,ÎóÂëÂÊBER=2.58824e-06
RaptorÂë£¬µ±Ç°¿ªÏú=2.00,µ±Ç°Ö¡ÊýÎª1700, ÎóÖ¡ÂÊPER=0.00000e+00,ÎóÂëÂÊBER=0.00000e+00
LTÂë£¬µ±Ç°¿ªÏú=2.00,µ±Ç°Ö¡ÊýÎª1800, ÎóÖ¡ÂÊPER=1.27778e-02,ÎóÂëÂÊBER=2.55556e-06
RaptorÂë£¬µ±Ç°¿ªÏú=2.00,µ±Ç°Ö¡ÊýÎª1800, ÎóÖ¡ÂÊPER=0.00000e+00,ÎóÂëÂÊBER=0.00000e+00
LTÂë£¬µ±Ç°¿ªÏú=2.00,µ±Ç°Ö¡ÊýÎª1900, ÎóÖ¡ÂÊPER=1.26316e-02,ÎóÂëÂÊBER=2.63158e-06
RaptorÂë£¬µ±Ç°¿ªÏú=2.00,µ±Ç°Ö¡ÊýÎª1900, ÎóÖ¡ÂÊPER=0.00000e+00,ÎóÂëÂÊBER=0.00000e+00
LTÂë£¬µ±Ç°¿ªÏú=2.00,µ±Ç°Ö¡ÊýÎª2000, ÎóÖ¡ÂÊPER=1.20000e-02,ÎóÂëÂÊBER=2.50000e-06
RaptorÂë£¬µ±Ç°¿ªÏú=2.00,µ±Ç°Ö¡ÊýÎª2000, ÎóÖ¡ÂÊPER=0.00000e+00,ÎóÂëÂÊBER=0.00000e+00
LTÂë£¬µ±Ç°¿ªÏú=2.00,µ±Ç°Ö¡ÊýÎª2100, ÎóÖ¡ÂÊPER=1.23810e-02,ÎóÂëÂÊBER=2.57143e-06
RaptorÂë£¬µ±Ç°¿ªÏú=2.00,µ±Ç°Ö¡ÊýÎª2100, ÎóÖ¡ÂÊPER=0.00000e+00,ÎóÂëÂÊBER=0.00000e+00
LTÂë£¬µ±Ç°¿ªÏú=2.00,µ±Ç°Ö¡ÊýÎª2200, ÎóÖ¡ÂÊPER=1.22727e-02,ÎóÂëÂÊBER=2.54545e-06
RaptorÂë£¬µ±Ç°¿ªÏú=2.00,µ±Ç°Ö¡ÊýÎª2200, ÎóÖ¡ÂÊPER=0.00000e+00,ÎóÂëÂÊBER=0.00000e+00
LTÂë£¬µ±Ç°¿ªÏú=2.00,µ±Ç°Ö¡ÊýÎª2300, ÎóÖ¡ÂÊPER=1.30435e-02,ÎóÂëÂÊBER=2.69565e-06
RaptorÂë£¬µ±Ç°¿ªÏú=2.00,µ±Ç°Ö¡ÊýÎª2300, ÎóÖ¡ÂÊPER=0.00000e+00,ÎóÂëÂÊBER=0.00000e+00
LTÂë£¬µ±Ç°¿ªÏú=2.00,µ±Ç°Ö¡ÊýÎª2400, ÎóÖ¡ÂÊPER=1.29167e-02,ÎóÂëÂÊBER=2.66667e-06
RaptorÂë£¬µ±Ç°¿ªÏú=2.00,µ±Ç°Ö¡ÊýÎª2400, ÎóÖ¡ÂÊPER=0.00000e+00,ÎóÂëÂÊBER=0.00000e+00
LTÂë£¬µ±Ç°¿ªÏú=2.00,µ±Ç°Ö¡ÊýÎª2500, ÎóÖ¡ÂÊPER=1.28000e-02,ÎóÂëÂÊBER=2.64000e-06
RaptorÂë£¬µ±Ç°¿ªÏú=2.00,µ±Ç°Ö¡ÊýÎª2500, ÎóÖ¡ÂÊPER=0.00000e+00,ÎóÂëÂÊBER=0.00000e+00
LTÂë£¬µ±Ç°¿ªÏú=2.00,µ±Ç°Ö¡ÊýÎª2600, ÎóÖ¡ÂÊPER=1.23077e-02,ÎóÂëÂÊBER=2.53846e-06
RaptorÂë£¬µ±Ç°¿ªÏú=2.00,µ±Ç°Ö¡ÊýÎª2600, ÎóÖ¡ÂÊPER=0.00000e+00,ÎóÂëÂÊBER=0.00000e+00
LTÂë£¬µ±Ç°¿ªÏú=2.00,µ±Ç°Ö¡ÊýÎª2700, ÎóÖ¡ÂÊPER=1.18519e-02,ÎóÂëÂÊBER=2.44444e-06
RaptorÂë£¬µ±Ç°¿ªÏú=2.00,µ±Ç°Ö¡ÊýÎª2700, ÎóÖ¡ÂÊPER=0.00000e+00,ÎóÂëÂÊBER=0.00000e+00
LTÂë£¬µ±Ç°¿ªÏú=2.00,µ±Ç°Ö¡ÊýÎª2800, ÎóÖ¡ÂÊPER=1.14286e-02,ÎóÂëÂÊBER=2.35714e-06
RaptorÂë£¬µ±Ç°¿ªÏú=2.00,µ±Ç°Ö¡ÊýÎª2800, ÎóÖ¡ÂÊPER=0.00000e+00,ÎóÂëÂÊBER=0.00000e+00
LTÂë£¬µ±Ç°¿ªÏú=2.00,µ±Ç°Ö¡ÊýÎª2900, ÎóÖ¡ÂÊPER=1.13793e-02,ÎóÂëÂÊBER=2.34483e-06
RaptorÂë£¬µ±Ç°¿ªÏú=2.00,µ±Ç°Ö¡ÊýÎª2900, ÎóÖ¡ÂÊPER=0.00000e+00,ÎóÂëÂÊBER=0.00000e+00
LTÂë£¬µ±Ç°¿ªÏú=2.00,µ±Ç°Ö¡ÊýÎª3000, ÎóÖ¡ÂÊPER=1.10000e-02,ÎóÂëÂÊBER=2.26667e-06
RaptorÂë£¬µ±Ç°¿ªÏú=2.00,µ±Ç°Ö¡ÊýÎª3000, ÎóÖ¡ÂÊPER=0.00000e+00,ÎóÂëÂÊBER=0.00000e+00
LTÂë£¬µ±Ç°¿ªÏú=2.00,µ±Ç°Ö¡ÊýÎª3100, ÎóÖ¡ÂÊPER=1.06452e-02,ÎóÂëÂÊBER=2.19355e-06
RaptorÂë£¬µ±Ç°¿ªÏú=2.00,µ±Ç°Ö¡ÊýÎª3100, ÎóÖ¡ÂÊPER=0.00000e+00,ÎóÂëÂÊBER=0.00000e+00
LTÂë£¬µ±Ç°¿ªÏú=2.00,µ±Ç°Ö¡ÊýÎª3200, ÎóÖ¡ÂÊPER=1.06250e-02,ÎóÂëÂÊBER=2.18750e-06
RaptorÂë£¬µ±Ç°¿ªÏú=2.00,µ±Ç°Ö¡ÊýÎª3200, ÎóÖ¡ÂÊPER=0.00000e+00,ÎóÂëÂÊBER=0.00000e+00
LTÂë£¬µ±Ç°¿ªÏú=2.00,µ±Ç°Ö¡ÊýÎª3300, ÎóÖ¡ÂÊPER=1.06061e-02,ÎóÂëÂÊBER=2.18182e-06
RaptorÂë£¬µ±Ç°¿ªÏú=2.00,µ±Ç°Ö¡ÊýÎª3300, ÎóÖ¡ÂÊPER=0.00000e+00,ÎóÂëÂÊBER=0.00000e+00
LTÂë£¬µ±Ç°¿ªÏú=2.00,µ±Ç°Ö¡ÊýÎª3400, ÎóÖ¡ÂÊPER=1.11765e-02,ÎóÂëÂÊBER=2.29412e-06
RaptorÂë£¬µ±Ç°¿ªÏú=2.00,µ±Ç°Ö¡ÊýÎª3400, ÎóÖ¡ÂÊPER=0.00000e+00,ÎóÂëÂÊBER=0.00000e+00
LTÂë£¬µ±Ç°¿ªÏú=2.00,µ±Ç°Ö¡ÊýÎª3500, ÎóÖ¡ÂÊPER=1.11429e-02,ÎóÂëÂÊBER=2.28571e-06
RaptorÂë£¬µ±Ç°¿ªÏú=2.00,µ±Ç°Ö¡ÊýÎª3500, ÎóÖ¡ÂÊPER=0.00000e+00,ÎóÂëÂÊBER=0.00000e+00
LTÂë£¬µ±Ç°¿ªÏú=2.00,µ±Ç°Ö¡ÊýÎª3600, ÎóÖ¡ÂÊPER=1.11111e-02,ÎóÂëÂÊBER=2.27778e-06
RaptorÂë£¬µ±Ç°¿ªÏú=2.00,µ±Ç°Ö¡ÊýÎª3600, ÎóÖ¡ÂÊPER=0.00000e+00,ÎóÂëÂÊBER=0.00000e+00
LTÂë£¬µ±Ç°¿ªÏú=2.00,µ±Ç°Ö¡ÊýÎª3700, ÎóÖ¡ÂÊPER=1.10811e-02,ÎóÂëÂÊBER=2.27027e-06
RaptorÂë£¬µ±Ç°¿ªÏú=2.00,µ±Ç°Ö¡ÊýÎª3700, ÎóÖ¡ÂÊPER=0.00000e+00,ÎóÂëÂÊBER=0.00000e+00
LTÂë£¬µ±Ç°¿ªÏú=2.00,µ±Ç°Ö¡ÊýÎª3800, ÎóÖ¡ÂÊPER=1.07895e-02,ÎóÂëÂÊBER=2.21053e-06
RaptorÂë£¬µ±Ç°¿ªÏú=2.00,µ±Ç°Ö¡ÊýÎª3800, ÎóÖ¡ÂÊPER=0.00000e+00,ÎóÂëÂÊBER=0.00000e+00
LTÂë£¬µ±Ç°¿ªÏú=2.00,µ±Ç°Ö¡ÊýÎª3900, ÎóÖ¡ÂÊPER=1.07692e-02,ÎóÂëÂÊBER=2.20513e-06
RaptorÂë£¬µ±Ç°¿ªÏú=2.00,µ±Ç°Ö¡ÊýÎª3900, ÎóÖ¡ÂÊPER=0.00000e+00,ÎóÂëÂÊBER=0.00000e+00
LTÂë£¬µ±Ç°¿ªÏú=2.00,µ±Ç°Ö¡ÊýÎª4000, ÎóÖ¡ÂÊPER=1.05000e-02,ÎóÂëÂÊBER=2.15000e-06
RaptorÂë£¬µ±Ç°¿ªÏú=2.00,µ±Ç°Ö¡ÊýÎª4000, ÎóÖ¡ÂÊPER=0.00000e+00,ÎóÂëÂÊBER=0.00000e+00
LTÂë£¬µ±Ç°¿ªÏú=2.00,µ±Ç°Ö¡ÊýÎª4100, ÎóÖ¡ÂÊPER=1.04878e-02,ÎóÂëÂÊBER=2.14634e-06
RaptorÂë£¬µ±Ç°¿ªÏú=2.00,µ±Ç°Ö¡ÊýÎª4100, ÎóÖ¡ÂÊPER=0.00000e+00,ÎóÂëÂÊBER=0.00000e+00
LTÂë£¬µ±Ç°¿ªÏú=2.00,µ±Ç°Ö¡ÊýÎª4200, ÎóÖ¡ÂÊPER=1.04762e-02,ÎóÂëÂÊBER=2.14286e-06
RaptorÂë£¬µ±Ç°¿ªÏú=2.00,µ±Ç°Ö¡ÊýÎª4200, ÎóÖ¡ÂÊPER=0.00000e+00,ÎóÂëÂÊBER=0.00000e+00
LTÂë£¬µ±Ç°¿ªÏú=2.00,µ±Ç°Ö¡ÊýÎª4300, ÎóÖ¡ÂÊPER=1.04651e-02,ÎóÂëÂÊBER=2.13953e-06
RaptorÂë£¬µ±Ç°¿ªÏú=2.00,µ±Ç°Ö¡ÊýÎª4300, ÎóÖ¡ÂÊPER=0.00000e+00,ÎóÂëÂÊBER=0.00000e+00
LTÂë£¬µ±Ç°¿ªÏú=2.00,µ±Ç°Ö¡ÊýÎª4400, ÎóÖ¡ÂÊPER=1.04545e-02,ÎóÂëÂÊBER=2.13636e-06
RaptorÂë£¬µ±Ç°¿ªÏú=2.00,µ±Ç°Ö¡ÊýÎª4400, ÎóÖ¡ÂÊPER=0.00000e+00,ÎóÂëÂÊBER=0.00000e+00
LTÂë£¬µ±Ç°¿ªÏú=2.00,µ±Ç°Ö¡ÊýÎª4500, ÎóÖ¡ÂÊPER=1.04444e-02,ÎóÂëÂÊBER=2.13333e-06
RaptorÂë£¬µ±Ç°¿ªÏú=2.00,µ±Ç°Ö¡ÊýÎª4500, ÎóÖ¡ÂÊPER=0.00000e+00,ÎóÂëÂÊBER=0.00000e+00
LTÂë£¬µ±Ç°¿ªÏú=2.00,µ±Ç°Ö¡ÊýÎª4600, ÎóÖ¡ÂÊPER=1.04348e-02,ÎóÂëÂÊBER=2.13043e-06
RaptorÂë£¬µ±Ç°¿ªÏú=2.00,µ±Ç°Ö¡ÊýÎª4600, ÎóÖ¡ÂÊPER=0.00000e+00,ÎóÂëÂÊBER=0.00000e+00
LTÂë£¬µ±Ç°¿ªÏú=2.00,µ±Ç°Ö¡ÊýÎª4700, ÎóÖ¡ÂÊPER=1.04255e-02,ÎóÂëÂÊBER=2.12766e-06
RaptorÂë£¬µ±Ç°¿ªÏú=2.00,µ±Ç°Ö¡ÊýÎª4700, ÎóÖ¡ÂÊPER=0.00000e+00,ÎóÂëÂÊBER=0.00000e+00
LTÂë£¬µ±Ç°¿ªÏú=2.00,µ±Ç°Ö¡ÊýÎª4800, ÎóÖ¡ÂÊPER=1.02083e-02,ÎóÂëÂÊBER=2.08333e-06
RaptorÂë£¬µ±Ç°¿ªÏú=2.00,µ±Ç°Ö¡ÊýÎª4800, ÎóÖ¡ÂÊPER=0.00000e+00,ÎóÂëÂÊBER=0.00000e+00
LTÂë£¬µ±Ç°¿ªÏú=2.00,µ±Ç°Ö¡ÊýÎª4900, ÎóÖ¡ÂÊPER=1.02041e-02,ÎóÂëÂÊBER=2.08163e-06
RaptorÂë£¬µ±Ç°¿ªÏú=2.00,µ±Ç°Ö¡ÊýÎª4900, ÎóÖ¡ÂÊPER=0.00000e+00,ÎóÂëÂÊBER=0.00000e+00
LTÂë£¬µ±Ç°¿ªÏú=2.00,µ±Ç°Ö¡ÊýÎª5000, ÎóÖ¡ÂÊPER=1.04000e-02,ÎóÂëÂÊBER=2.12000e-06
RaptorÂë£¬µ±Ç°¿ªÏú=2.00,µ±Ç°Ö¡ÊýÎª5000, ÎóÖ¡ÂÊPER=0.00000e+00,ÎóÂëÂÊBER=0.00000e+00
µ±Ç°ÐÅµÀ±ê×¼²î=100.00,¿ªÏú=2.00,µ±Ç°Ö¡ÊýÎª5000, LTÂëÎóÂëÂÊBER_LT=2.12000e-06,RaptorÎóÂëÂÊBER=0.00000e+00
ÐÅµÀ±ê×¼²î·¶Î§Îª£º
Inf  
¿ªÏú·¶Î§Îª£º
0.50  0.60  0.70  0.80  0.90  1.00  1.10  1.20  1.30  1.40  1.50  1.60  1.70  1.80  1.90  2.00  
LTÎóÂëÂÊBER_LTÎª£º
1.37190e-01  1.30940e-01  1.25350e-01  1.16920e-01  1.04200e-01  6.15300e-02  1.73200e-02  8.92000e-03  5.03636e-03  9.96970e-04  5.55556e-05  1.42045e-05  1.03413e-05  6.99545e-06  4.04531e-06  2.12000e-06  
RaptorÎóÂëÂÊBERÎª£º
1.37388e-01  1.30878e-01  1.25490e-01  1.16806e-01  1.04163e-01  6.16429e-02  1.72449e-02  8.65306e-03  4.31354e-03  7.66852e-04  1.70068e-05  0.00000e+00  0.00000e+00  0.00000e+00  0.00000e+00  0.00000e+00  
Ê±¼äÒÑ¹ý 96407.967648 Ãë¡£
