# Supplementary material for: An Efficient Design of Systematic Rateless Codes
Source: Hindawi journal article supplement (doi:10.1155/2020/8068414), 2020-05-19
Supplement: f1 [file 8068414.f1.zip › supplementary files/Matlab_code_for_Figure1/BER_by_Simulation/实际码字结果/AWGN_dist2016977_K9800_S.txt]

20190612²âÊÔËõÐ¡ÄÚÂëÊä³öLLRÐ§¹û£¬ÇÒËõ¼õÒò×ÓÎª

zoom_in =

     1


rho =

     0


sigma_n_2 =

   0.954529000000000


sigma_vec =

   Inf


dist_num =

     2.016977000000000e+03

µ±Ç°ÐÅµÀÎªPBIÐÅµÀ
K =

        9800


out_node_index =

  1 ÖÁ 18 ÁÐ

     1     2     3     4     5     6     7     8     9    10    11    12    13    14    15    16    17    18

  19 ÖÁ 21 ÁÐ

    19    20   200


out_node_degree =

  1 ÖÁ 5 ÁÐ

   0.004400000000000   0.004600000000000   0.005500000000000   0.004800000000000   0.332700000000000

  6 ÖÁ 10 ÁÐ

   0.414300000000000   0.087500000000000   0.075800000000000   0.005900000000000   0.005000000000000

  11 ÖÁ 15 ÁÐ

   0.005400000000000   0.005900000000000   0.004700000000000   0.003400000000000   0.002600000000000

  16 ÖÁ 20 ÁÐ

   0.001200000000000   0.001000000000000   0.000800000000000   0.000600000000000   0.000300000000000

  21 ÖÁ 25 ÁÐ

                   0                   0                   0                   0                   0

  26 ÖÁ 30 ÁÐ

                   0                   0                   0                   0                   0

  31 ÖÁ 35 ÁÐ

                   0                   0                   0                   0                   0

  36 ÖÁ 40 ÁÐ

                   0                   0                   0                   0                   0

  41 ÖÁ 45 ÁÐ

                   0                   0                   0                   0                   0

  46 ÖÁ 50 ÁÐ

                   0                   0                   0                   0                   0

  51 ÖÁ 55 ÁÐ

                   0                   0                   0                   0                   0

  56 ÖÁ 60 ÁÐ

                   0                   0                   0                   0                   0

  61 ÖÁ 65 ÁÐ

                   0                   0                   0                   0                   0

  66 ÖÁ 70 ÁÐ

                   0                   0                   0                   0                   0

  71 ÖÁ 75 ÁÐ

                   0                   0                   0                   0                   0

  76 ÖÁ 80 ÁÐ

                   0                   0                   0                   0                   0

  81 ÖÁ 85 ÁÐ

                   0                   0                   0                   0                   0

  86 ÖÁ 90 ÁÐ

                   0                   0                   0                   0                   0

  91 ÖÁ 95 ÁÐ

                   0                   0                   0                   0                   0

  96 ÖÁ 100 ÁÐ

                   0                   0                   0                   0                   0

  101 ÖÁ 105 ÁÐ

                   0                   0                   0                   0                   0

  106 ÖÁ 110 ÁÐ

                   0                   0                   0                   0                   0

  111 ÖÁ 115 ÁÐ

                   0                   0                   0                   0                   0

  116 ÖÁ 120 ÁÐ

                   0                   0                   0                   0                   0

  121 ÖÁ 125 ÁÐ

                   0                   0                   0                   0                   0

  126 ÖÁ 130 ÁÐ

                   0                   0                   0                   0                   0

  131 ÖÁ 135 ÁÐ

                   0                   0                   0                   0                   0

  136 ÖÁ 140 ÁÐ

                   0                   0                   0                   0                   0

  141 ÖÁ 145 ÁÐ

                   0                   0                   0                   0                   0

  146 ÖÁ 150 ÁÐ

                   0                   0                   0                   0                   0

  151 ÖÁ 155 ÁÐ

                   0                   0                   0                   0                   0

  156 ÖÁ 160 ÁÐ

                   0                   0                   0                   0                   0

  161 ÖÁ 165 ÁÐ

                   0                   0                   0                   0                   0

  166 ÖÁ 170 ÁÐ

                   0                   0                   0                   0                   0

  171 ÖÁ 175 ÁÐ

                   0                   0                   0                   0                   0

  176 ÖÁ 180 ÁÐ

                   0                   0                   0                   0                   0

  181 ÖÁ 185 ÁÐ

                   0                   0                   0                   0                   0

  186 ÖÁ 190 ÁÐ

                   0                   0                   0                   0                   0

  191 ÖÁ 195 ÁÐ

                   0                   0                   0                   0                   0

  196 ÖÁ 200 ÁÐ

                   0                   0                   0                   0   0.033200000000000

ÕýÔÚ¶ÔÍâÂë½øÐÐÏßÐÔPEG±àÂë£¬ÇëÉÔµÈ...
µ±Ç°Ñ¡ÔñµÄÊÇÏµÍ³Âë
LTÂë£¬µ±Ç°¿ªÏú=1.20,µ±Ç°Ö¡ÊýÎª50, ÎóÖ¡ÂÊPER=1.00000e+00,ÎóÂëÂÊBER=8.27600e-03
RaptorÂë£¬µ±Ç°¿ªÏú=1.20,µ±Ç°Ö¡ÊýÎª50, ÎóÖ¡ÂÊPER=1.00000e+00,ÎóÂëÂÊBER=8.15918e-03
´íÎó±ÈÌØÊýºÍÖ¡Êý¶¼´ïµ½Ò»¶¨Á¿£¬ÐèÒªÔö¼Ó¿ªÏú
µ±Ç°ÐÅµÀ±ê×¼²î=100.00,¿ªÏú=1.20,µ±Ç°Ö¡ÊýÎª50, LTÂëÎóÂëÂÊBER_LT=8.27600e-03,RaptorÎóÂëÂÊBER=8.15918e-03
LTÂë£¬µ±Ç°¿ªÏú=1.30,µ±Ç°Ö¡ÊýÎª50, ÎóÖ¡ÂÊPER=9.20000e-01,ÎóÂëÂÊBER=4.05600e-03
RaptorÂë£¬µ±Ç°¿ªÏú=1.30,µ±Ç°Ö¡ÊýÎª50, ÎóÖ¡ÂÊPER=6.00000e-01,ÎóÂëÂÊBER=3.51020e-03
´íÎó±ÈÌØÊýºÍÖ¡Êý¶¼´ïµ½Ò»¶¨Á¿£¬ÐèÒªÔö¼Ó¿ªÏú
µ±Ç°ÐÅµÀ±ê×¼²î=100.00,¿ªÏú=1.30,µ±Ç°Ö¡ÊýÎª82, LTÂëÎóÂëÂÊBER_LT=3.83902e-03,RaptorÎóÂëÂÊBER=3.20433e-03
LTÂë£¬µ±Ç°¿ªÏú=1.40,µ±Ç°Ö¡ÊýÎª50, ÎóÖ¡ÂÊPER=4.60000e-01,ÎóÂëÂÊBER=4.26000e-04
RaptorÂë£¬µ±Ç°¿ªÏú=1.40,µ±Ç°Ö¡ÊýÎª50, ÎóÖ¡ÂÊPER=6.00000e-02,ÎóÂëÂÊBER=3.06122e-04
LTÂë£¬µ±Ç°¿ªÏú=1.40,µ±Ç°Ö¡ÊýÎª100, ÎóÖ¡ÂÊPER=3.80000e-01,ÎóÂëÂÊBER=2.87000e-04
RaptorÂë£¬µ±Ç°¿ªÏú=1.40,µ±Ç°Ö¡ÊýÎª100, ÎóÖ¡ÂÊPER=4.00000e-02,ÎóÂëÂÊBER=2.02041e-04
LTÂë£¬µ±Ç°¿ªÏú=1.40,µ±Ç°Ö¡ÊýÎª150, ÎóÖ¡ÂÊPER=4.20000e-01,ÎóÂëÂÊBER=2.15333e-04
RaptorÂë£¬µ±Ç°¿ªÏú=1.40,µ±Ç°Ö¡ÊýÎª150, ÎóÖ¡ÂÊPER=2.66667e-02,ÎóÂëÂÊBER=1.34694e-04
LTÂë£¬µ±Ç°¿ªÏú=1.40,µ±Ç°Ö¡ÊýÎª200, ÎóÖ¡ÂÊPER=4.05000e-01,ÎóÂëÂÊBER=2.03000e-04
RaptorÂë£¬µ±Ç°¿ªÏú=1.40,µ±Ç°Ö¡ÊýÎª200, ÎóÖ¡ÂÊPER=2.50000e-02,ÎóÂëÂÊBER=1.26020e-04
LTÂë£¬µ±Ç°¿ªÏú=1.40,µ±Ç°Ö¡ÊýÎª250, ÎóÖ¡ÂÊPER=4.16000e-01,ÎóÂëÂÊBER=2.17200e-04
RaptorÂë£¬µ±Ç°¿ªÏú=1.40,µ±Ç°Ö¡ÊýÎª250, ÎóÖ¡ÂÊPER=2.80000e-02,ÎóÂëÂÊBER=1.24082e-04
LTÂë£¬µ±Ç°¿ªÏú=1.40,µ±Ç°Ö¡ÊýÎª300, ÎóÖ¡ÂÊPER=4.20000e-01,ÎóÂëÂÊBER=2.09333e-04
RaptorÂë£¬µ±Ç°¿ªÏú=1.40,µ±Ç°Ö¡ÊýÎª300, ÎóÖ¡ÂÊPER=2.66667e-02,ÎóÂëÂÊBER=1.17687e-04
LTÂë£¬µ±Ç°¿ªÏú=1.40,µ±Ç°Ö¡ÊýÎª350, ÎóÖ¡ÂÊPER=4.25714e-01,ÎóÂëÂÊBER=2.27429e-04
RaptorÂë£¬µ±Ç°¿ªÏú=1.40,µ±Ç°Ö¡ÊýÎª350, ÎóÖ¡ÂÊPER=2.85714e-02,ÎóÂëÂÊBER=1.25656e-04
LTÂë£¬µ±Ç°¿ªÏú=1.40,µ±Ç°Ö¡ÊýÎª400, ÎóÖ¡ÂÊPER=4.25000e-01,ÎóÂëÂÊBER=2.21500e-04
RaptorÂë£¬µ±Ç°¿ªÏú=1.40,µ±Ç°Ö¡ÊýÎª400, ÎóÖ¡ÂÊPER=2.75000e-02,ÎóÂëÂÊBER=1.26531e-04
LTÂë£¬µ±Ç°¿ªÏú=1.40,µ±Ç°Ö¡ÊýÎª450, ÎóÖ¡ÂÊPER=4.31111e-01,ÎóÂëÂÊBER=2.22222e-04
RaptorÂë£¬µ±Ç°¿ªÏú=1.40,µ±Ç°Ö¡ÊýÎª450, ÎóÖ¡ÂÊPER=2.66667e-02,ÎóÂëÂÊBER=1.20635e-04
LTÂë£¬µ±Ç°¿ªÏú=1.40,µ±Ç°Ö¡ÊýÎª500, ÎóÖ¡ÂÊPER=4.32000e-01,ÎóÂëÂÊBER=2.08200e-04
RaptorÂë£¬µ±Ç°¿ªÏú=1.40,µ±Ç°Ö¡ÊýÎª500, ÎóÖ¡ÂÊPER=2.40000e-02,ÎóÂëÂÊBER=1.08571e-04
LTÂë£¬µ±Ç°¿ªÏú=1.40,µ±Ç°Ö¡ÊýÎª550, ÎóÖ¡ÂÊPER=4.43636e-01,ÎóÂëÂÊBER=2.06364e-04
RaptorÂë£¬µ±Ç°¿ªÏú=1.40,µ±Ç°Ö¡ÊýÎª550, ÎóÖ¡ÂÊPER=2.36364e-02,ÎóÂëÂÊBER=1.03525e-04
LTÂë£¬µ±Ç°¿ªÏú=1.40,µ±Ç°Ö¡ÊýÎª600, ÎóÖ¡ÂÊPER=4.45000e-01,ÎóÂëÂÊBER=2.03667e-04
RaptorÂë£¬µ±Ç°¿ªÏú=1.40,µ±Ç°Ö¡ÊýÎª600, ÎóÖ¡ÂÊPER=2.33333e-02,ÎóÂëÂÊBER=1.06463e-04
LTÂë£¬µ±Ç°¿ªÏú=1.40,µ±Ç°Ö¡ÊýÎª650, ÎóÖ¡ÂÊPER=4.47692e-01,ÎóÂëÂÊBER=2.03538e-04
RaptorÂë£¬µ±Ç°¿ªÏú=1.40,µ±Ç°Ö¡ÊýÎª650, ÎóÖ¡ÂÊPER=2.30769e-02,ÎóÂëÂÊBER=1.03297e-04
LTÂë£¬µ±Ç°¿ªÏú=1.40,µ±Ç°Ö¡ÊýÎª700, ÎóÖ¡ÂÊPER=4.45714e-01,ÎóÂëÂÊBER=1.93286e-04
RaptorÂë£¬µ±Ç°¿ªÏú=1.40,µ±Ç°Ö¡ÊýÎª700, ÎóÖ¡ÂÊPER=2.14286e-02,ÎóÂëÂÊBER=9.59184e-05
LTÂë£¬µ±Ç°¿ªÏú=1.40,µ±Ç°Ö¡ÊýÎª750, ÎóÖ¡ÂÊPER=4.56000e-01,ÎóÂëÂÊBER=1.91867e-04
RaptorÂë£¬µ±Ç°¿ªÏú=1.40,µ±Ç°Ö¡ÊýÎª750, ÎóÖ¡ÂÊPER=2.13333e-02,ÎóÂëÂÊBER=9.61905e-05
LTÂë£¬µ±Ç°¿ªÏú=1.40,µ±Ç°Ö¡ÊýÎª800, ÎóÖ¡ÂÊPER=4.48750e-01,ÎóÂëÂÊBER=1.83125e-04
RaptorÂë£¬µ±Ç°¿ªÏú=1.40,µ±Ç°Ö¡ÊýÎª800, ÎóÖ¡ÂÊPER=2.00000e-02,ÎóÂëÂÊBER=9.01786e-05
LTÂë£¬µ±Ç°¿ªÏú=1.40,µ±Ç°Ö¡ÊýÎª850, ÎóÖ¡ÂÊPER=4.45882e-01,ÎóÂëÂÊBER=1.98353e-04
RaptorÂë£¬µ±Ç°¿ªÏú=1.40,µ±Ç°Ö¡ÊýÎª850, ÎóÖ¡ÂÊPER=2.23529e-02,ÎóÂëÂÊBER=1.01441e-04
LTÂë£¬µ±Ç°¿ªÏú=1.40,µ±Ç°Ö¡ÊýÎª900, ÎóÖ¡ÂÊPER=4.48889e-01,ÎóÂëÂÊBER=1.97000e-04
RaptorÂë£¬µ±Ç°¿ªÏú=1.40,µ±Ç°Ö¡ÊýÎª900, ÎóÖ¡ÂÊPER=2.22222e-02,ÎóÂëÂÊBER=9.89796e-05
LTÂë£¬µ±Ç°¿ªÏú=1.40,µ±Ç°Ö¡ÊýÎª950, ÎóÖ¡ÂÊPER=4.46316e-01,ÎóÂëÂÊBER=1.95579e-04
RaptorÂë£¬µ±Ç°¿ªÏú=1.40,µ±Ç°Ö¡ÊýÎª950, ÎóÖ¡ÂÊPER=2.21053e-02,ÎóÂëÂÊBER=9.76369e-05
LTÂë£¬µ±Ç°¿ªÏú=1.40,µ±Ç°Ö¡ÊýÎª1000, ÎóÖ¡ÂÊPER=4.44000e-01,ÎóÂëÂÊBER=1.98100e-04
RaptorÂë£¬µ±Ç°¿ªÏú=1.40,µ±Ç°Ö¡ÊýÎª1000, ÎóÖ¡ÂÊPER=2.30000e-02,ÎóÂëÂÊBER=9.93878e-05
LTÂë£¬µ±Ç°¿ªÏú=1.40,µ±Ç°Ö¡ÊýÎª1050, ÎóÖ¡ÂÊPER=4.40000e-01,ÎóÂëÂÊBER=1.97619e-04
RaptorÂë£¬µ±Ç°¿ªÏú=1.40,µ±Ç°Ö¡ÊýÎª1050, ÎóÖ¡ÂÊPER=2.19048e-02,ÎóÂëÂÊBER=9.46550e-05
LTÂë£¬µ±Ç°¿ªÏú=1.40,µ±Ç°Ö¡ÊýÎª1100, ÎóÖ¡ÂÊPER=4.40909e-01,ÎóÂëÂÊBER=2.00818e-04
RaptorÂë£¬µ±Ç°¿ªÏú=1.40,µ±Ç°Ö¡ÊýÎª1100, ÎóÖ¡ÂÊPER=2.27273e-02,ÎóÂëÂÊBER=9.78664e-05
LTÂë£¬µ±Ç°¿ªÏú=1.40,µ±Ç°Ö¡ÊýÎª1150, ÎóÖ¡ÂÊPER=4.35652e-01,ÎóÂëÂÊBER=2.03304e-04
RaptorÂë£¬µ±Ç°¿ªÏú=1.40,µ±Ç°Ö¡ÊýÎª1150, ÎóÖ¡ÂÊPER=2.34783e-02,ÎóÂëÂÊBER=1.01597e-04
LTÂë£¬µ±Ç°¿ªÏú=1.40,µ±Ç°Ö¡ÊýÎª1200, ÎóÖ¡ÂÊPER=4.35833e-01,ÎóÂëÂÊBER=1.97417e-04
RaptorÂë£¬µ±Ç°¿ªÏú=1.40,µ±Ç°Ö¡ÊýÎª1200, ÎóÖ¡ÂÊPER=2.25000e-02,ÎóÂëÂÊBER=9.73639e-05
LTÂë£¬µ±Ç°¿ªÏú=1.40,µ±Ç°Ö¡ÊýÎª1250, ÎóÖ¡ÂÊPER=4.32000e-01,ÎóÂëÂÊBER=1.94880e-04
RaptorÂë£¬µ±Ç°¿ªÏú=1.40,µ±Ç°Ö¡ÊýÎª1250, ÎóÖ¡ÂÊPER=2.24000e-02,ÎóÂëÂÊBER=9.62449e-05
LTÂë£¬µ±Ç°¿ªÏú=1.40,µ±Ç°Ö¡ÊýÎª1300, ÎóÖ¡ÂÊPER=4.29231e-01,ÎóÂëÂÊBER=1.94923e-04
RaptorÂë£¬µ±Ç°¿ªÏú=1.40,µ±Ç°Ö¡ÊýÎª1300, ÎóÖ¡ÂÊPER=2.23077e-02,ÎóÂëÂÊBER=9.51334e-05
LTÂë£¬µ±Ç°¿ªÏú=1.40,µ±Ç°Ö¡ÊýÎª1350, ÎóÖ¡ÂÊPER=4.31852e-01,ÎóÂëÂÊBER=1.98444e-04
RaptorÂë£¬µ±Ç°¿ªÏú=1.40,µ±Ç°Ö¡ÊýÎª1350, ÎóÖ¡ÂÊPER=2.29630e-02,ÎóÂëÂÊBER=9.88662e-05
LTÂë£¬µ±Ç°¿ªÏú=1.40,µ±Ç°Ö¡ÊýÎª1400, ÎóÖ¡ÂÊPER=4.32857e-01,ÎóÂëÂÊBER=1.96714e-04
RaptorÂë£¬µ±Ç°¿ªÏú=1.40,µ±Ç°Ö¡ÊýÎª1400, ÎóÖ¡ÂÊPER=2.28571e-02,ÎóÂëÂÊBER=9.69388e-05
LTÂë£¬µ±Ç°¿ªÏú=1.40,µ±Ç°Ö¡ÊýÎª1450, ÎóÖ¡ÂÊPER=4.35172e-01,ÎóÂëÂÊBER=2.00138e-04
RaptorÂë£¬µ±Ç°¿ªÏú=1.40,µ±Ç°Ö¡ÊýÎª1450, ÎóÖ¡ÂÊPER=2.34483e-02,ÎóÂëÂÊBER=9.66925e-05
LTÂë£¬µ±Ç°¿ªÏú=1.40,µ±Ç°Ö¡ÊýÎª1500, ÎóÖ¡ÂÊPER=4.33333e-01,ÎóÂëÂÊBER=1.98400e-04
RaptorÂë£¬µ±Ç°¿ªÏú=1.40,µ±Ç°Ö¡ÊýÎª1500, ÎóÖ¡ÂÊPER=2.33333e-02,ÎóÂëÂÊBER=9.63265e-05
LTÂë£¬µ±Ç°¿ªÏú=1.40,µ±Ç°Ö¡ÊýÎª1550, ÎóÖ¡ÂÊPER=4.33548e-01,ÎóÂëÂÊBER=1.98516e-04
RaptorÂë£¬µ±Ç°¿ªÏú=1.40,µ±Ç°Ö¡ÊýÎª1550, ÎóÖ¡ÂÊPER=2.32258e-02,ÎóÂëÂÊBER=9.74984e-05
LTÂë£¬µ±Ç°¿ªÏú=1.40,µ±Ç°Ö¡ÊýÎª1600, ÎóÖ¡ÂÊPER=4.35000e-01,ÎóÂëÂÊBER=1.99688e-04
RaptorÂë£¬µ±Ç°¿ªÏú=1.40,µ±Ç°Ö¡ÊýÎª1600, ÎóÖ¡ÂÊPER=2.31250e-02,ÎóÂëÂÊBER=9.78316e-05
LTÂë£¬µ±Ç°¿ªÏú=1.40,µ±Ç°Ö¡ÊýÎª1650, ÎóÖ¡ÂÊPER=4.32121e-01,ÎóÂëÂÊBER=2.02788e-04
RaptorÂë£¬µ±Ç°¿ªÏú=1.40,µ±Ç°Ö¡ÊýÎª1650, ÎóÖ¡ÂÊPER=2.36364e-02,ÎóÂëÂÊBER=9.96908e-05
LTÂë£¬µ±Ç°¿ªÏú=1.40,µ±Ç°Ö¡ÊýÎª1700, ÎóÖ¡ÂÊPER=4.32353e-01,ÎóÂëÂÊBER=1.98882e-04
RaptorÂë£¬µ±Ç°¿ªÏú=1.40,µ±Ç°Ö¡ÊýÎª1700, ÎóÖ¡ÂÊPER=2.29412e-02,ÎóÂëÂÊBER=9.67587e-05
LTÂë£¬µ±Ç°¿ªÏú=1.40,µ±Ç°Ö¡ÊýÎª1750, ÎóÖ¡ÂÊPER=4.33143e-01,ÎóÂëÂÊBER=2.00629e-04
RaptorÂë£¬µ±Ç°¿ªÏú=1.40,µ±Ç°Ö¡ÊýÎª1750, ÎóÖ¡ÂÊPER=2.28571e-02,ÎóÂëÂÊBER=9.66181e-05
LTÂë£¬µ±Ç°¿ªÏú=1.40,µ±Ç°Ö¡ÊýÎª1800, ÎóÖ¡ÂÊPER=4.32222e-01,ÎóÂëÂÊBER=1.98944e-04
RaptorÂë£¬µ±Ç°¿ªÏú=1.40,µ±Ç°Ö¡ÊýÎª1800, ÎóÖ¡ÂÊPER=2.27778e-02,ÎóÂëÂÊBER=9.58617e-05
LTÂë£¬µ±Ç°¿ªÏú=1.40,µ±Ç°Ö¡ÊýÎª1850, ÎóÖ¡ÂÊPER=4.32432e-01,ÎóÂëÂÊBER=1.98324e-04
RaptorÂë£¬µ±Ç°¿ªÏú=1.40,µ±Ç°Ö¡ÊýÎª1850, ÎóÖ¡ÂÊPER=2.27027e-02,ÎóÂëÂÊBER=9.60838e-05
LTÂë£¬µ±Ç°¿ªÏú=1.40,µ±Ç°Ö¡ÊýÎª1900, ÎóÖ¡ÂÊPER=4.33158e-01,ÎóÂëÂÊBER=1.94895e-04
RaptorÂë£¬µ±Ç°¿ªÏú=1.40,µ±Ç°Ö¡ÊýÎª1900, ÎóÖ¡ÂÊPER=2.21053e-02,ÎóÂëÂÊBER=9.35553e-05
LTÂë£¬µ±Ç°¿ªÏú=1.40,µ±Ç°Ö¡ÊýÎª1950, ÎóÖ¡ÂÊPER=4.34359e-01,ÎóÂëÂÊBER=1.93795e-04
RaptorÂë£¬µ±Ç°¿ªÏú=1.40,µ±Ç°Ö¡ÊýÎª1950, ÎóÖ¡ÂÊPER=2.15385e-02,ÎóÂëÂÊBER=9.11565e-05
LTÂë£¬µ±Ç°¿ªÏú=1.40,µ±Ç°Ö¡ÊýÎª2000, ÎóÖ¡ÂÊPER=4.38500e-01,ÎóÂëÂÊBER=1.97550e-04
RaptorÂë£¬µ±Ç°¿ªÏú=1.40,µ±Ç°Ö¡ÊýÎª2000, ÎóÖ¡ÂÊPER=2.20000e-02,ÎóÂëÂÊBER=9.28571e-05
µ±Ç°ÐÅµÀ±ê×¼²î=100.00,¿ªÏú=1.40,µ±Ç°Ö¡ÊýÎª2000, LTÂëÎóÂëÂÊBER_LT=1.97550e-04,RaptorÎóÂëÂÊBER=9.28571e-05
LTÂë£¬µ±Ç°¿ªÏú=1.50,µ±Ç°Ö¡ÊýÎª50, ÎóÖ¡ÂÊPER=3.00000e-01,ÎóÂëÂÊBER=3.80000e-05
RaptorÂë£¬µ±Ç°¿ªÏú=1.50,µ±Ç°Ö¡ÊýÎª50, ÎóÖ¡ÂÊPER=0.00000e+00,ÎóÂëÂÊBER=0.00000e+00
LTÂë£¬µ±Ç°¿ªÏú=1.50,µ±Ç°Ö¡ÊýÎª100, ÎóÖ¡ÂÊPER=3.20000e-01,ÎóÂëÂÊBER=4.20000e-05
RaptorÂë£¬µ±Ç°¿ªÏú=1.50,µ±Ç°Ö¡ÊýÎª100, ÎóÖ¡ÂÊPER=0.00000e+00,ÎóÂëÂÊBER=0.00000e+00
LTÂë£¬µ±Ç°¿ªÏú=1.50,µ±Ç°Ö¡ÊýÎª150, ÎóÖ¡ÂÊPER=3.00000e-01,ÎóÂëÂÊBER=3.73333e-05
RaptorÂë£¬µ±Ç°¿ªÏú=1.50,µ±Ç°Ö¡ÊýÎª150, ÎóÖ¡ÂÊPER=0.00000e+00,ÎóÂëÂÊBER=0.00000e+00
LTÂë£¬µ±Ç°¿ªÏú=1.50,µ±Ç°Ö¡ÊýÎª200, ÎóÖ¡ÂÊPER=2.75000e-01,ÎóÂëÂÊBER=3.40000e-05
RaptorÂë£¬µ±Ç°¿ªÏú=1.50,µ±Ç°Ö¡ÊýÎª200, ÎóÖ¡ÂÊPER=0.00000e+00,ÎóÂëÂÊBER=0.00000e+00
LTÂë£¬µ±Ç°¿ªÏú=1.50,µ±Ç°Ö¡ÊýÎª250, ÎóÖ¡ÂÊPER=2.72000e-01,ÎóÂëÂÊBER=3.32000e-05
RaptorÂë£¬µ±Ç°¿ªÏú=1.50,µ±Ç°Ö¡ÊýÎª250, ÎóÖ¡ÂÊPER=0.00000e+00,ÎóÂëÂÊBER=0.00000e+00
LTÂë£¬µ±Ç°¿ªÏú=1.50,µ±Ç°Ö¡ÊýÎª300, ÎóÖ¡ÂÊPER=2.66667e-01,ÎóÂëÂÊBER=3.26667e-05
RaptorÂë£¬µ±Ç°¿ªÏú=1.50,µ±Ç°Ö¡ÊýÎª300, ÎóÖ¡ÂÊPER=0.00000e+00,ÎóÂëÂÊBER=0.00000e+00
LTÂë£¬µ±Ç°¿ªÏú=1.50,µ±Ç°Ö¡ÊýÎª350, ÎóÖ¡ÂÊPER=2.74286e-01,ÎóÂëÂÊBER=3.34286e-05
RaptorÂë£¬µ±Ç°¿ªÏú=1.50,µ±Ç°Ö¡ÊýÎª350, ÎóÖ¡ÂÊPER=0.00000e+00,ÎóÂëÂÊBER=0.00000e+00
LTÂë£¬µ±Ç°¿ªÏú=1.50,µ±Ç°Ö¡ÊýÎª400, ÎóÖ¡ÂÊPER=2.60000e-01,ÎóÂëÂÊBER=3.15000e-05
RaptorÂë£¬µ±Ç°¿ªÏú=1.50,µ±Ç°Ö¡ÊýÎª400, ÎóÖ¡ÂÊPER=0.00000e+00,ÎóÂëÂÊBER=0.00000e+00
LTÂë£¬µ±Ç°¿ªÏú=1.50,µ±Ç°Ö¡ÊýÎª450, ÎóÖ¡ÂÊPER=2.73333e-01,ÎóÂëÂÊBER=3.33333e-05
RaptorÂë£¬µ±Ç°¿ªÏú=1.50,µ±Ç°Ö¡ÊýÎª450, ÎóÖ¡ÂÊPER=0.00000e+00,ÎóÂëÂÊBER=0.00000e+00
LTÂë£¬µ±Ç°¿ªÏú=1.50,µ±Ç°Ö¡ÊýÎª500, ÎóÖ¡ÂÊPER=2.78000e-01,ÎóÂëÂÊBER=3.40000e-05
RaptorÂë£¬µ±Ç°¿ªÏú=1.50,µ±Ç°Ö¡ÊýÎª500, ÎóÖ¡ÂÊPER=0.00000e+00,ÎóÂëÂÊBER=0.00000e+00
LTÂë£¬µ±Ç°¿ªÏú=1.50,µ±Ç°Ö¡ÊýÎª550, ÎóÖ¡ÂÊPER=2.80000e-01,ÎóÂëÂÊBER=3.43636e-05
RaptorÂë£¬µ±Ç°¿ªÏú=1.50,µ±Ç°Ö¡ÊýÎª550, ÎóÖ¡ÂÊPER=0.00000e+00,ÎóÂëÂÊBER=0.00000e+00
LTÂë£¬µ±Ç°¿ªÏú=1.50,µ±Ç°Ö¡ÊýÎª600, ÎóÖ¡ÂÊPER=2.81667e-01,ÎóÂëÂÊBER=3.46667e-05
RaptorÂë£¬µ±Ç°¿ªÏú=1.50,µ±Ç°Ö¡ÊýÎª600, ÎóÖ¡ÂÊPER=0.00000e+00,ÎóÂëÂÊBER=0.00000e+00
LTÂë£¬µ±Ç°¿ªÏú=1.50,µ±Ç°Ö¡ÊýÎª650, ÎóÖ¡ÂÊPER=2.76923e-01,ÎóÂëÂÊBER=3.36923e-05
RaptorÂë£¬µ±Ç°¿ªÏú=1.50,µ±Ç°Ö¡ÊýÎª650, ÎóÖ¡ÂÊPER=0.00000e+00,ÎóÂëÂÊBER=0.00000e+00
LTÂë£¬µ±Ç°¿ªÏú=1.50,µ±Ç°Ö¡ÊýÎª700, ÎóÖ¡ÂÊPER=2.75714e-01,ÎóÂëÂÊBER=3.32857e-05
RaptorÂë£¬µ±Ç°¿ªÏú=1.50,µ±Ç°Ö¡ÊýÎª700, ÎóÖ¡ÂÊPER=0.00000e+00,ÎóÂëÂÊBER=0.00000e+00
LTÂë£¬µ±Ç°¿ªÏú=1.50,µ±Ç°Ö¡ÊýÎª750, ÎóÖ¡ÂÊPER=2.80000e-01,ÎóÂëÂÊBER=3.40000e-05
RaptorÂë£¬µ±Ç°¿ªÏú=1.50,µ±Ç°Ö¡ÊýÎª750, ÎóÖ¡ÂÊPER=0.00000e+00,ÎóÂëÂÊBER=0.00000e+00
LTÂë£¬µ±Ç°¿ªÏú=1.50,µ±Ç°Ö¡ÊýÎª800, ÎóÖ¡ÂÊPER=2.82500e-01,ÎóÂëÂÊBER=3.42500e-05
RaptorÂë£¬µ±Ç°¿ªÏú=1.50,µ±Ç°Ö¡ÊýÎª800, ÎóÖ¡ÂÊPER=0.00000e+00,ÎóÂëÂÊBER=0.00000e+00
LTÂë£¬µ±Ç°¿ªÏú=1.50,µ±Ç°Ö¡ÊýÎª850, ÎóÖ¡ÂÊPER=2.82353e-01,ÎóÂëÂÊBER=3.41176e-05
RaptorÂë£¬µ±Ç°¿ªÏú=1.50,µ±Ç°Ö¡ÊýÎª850, ÎóÖ¡ÂÊPER=0.00000e+00,ÎóÂëÂÊBER=0.00000e+00
LTÂë£¬µ±Ç°¿ªÏú=1.50,µ±Ç°Ö¡ÊýÎª900, ÎóÖ¡ÂÊPER=2.87778e-01,ÎóÂëÂÊBER=3.46667e-05
RaptorÂë£¬µ±Ç°¿ªÏú=1.50,µ±Ç°Ö¡ÊýÎª900, ÎóÖ¡ÂÊPER=0.00000e+00,ÎóÂëÂÊBER=0.00000e+00
LTÂë£¬µ±Ç°¿ªÏú=1.50,µ±Ç°Ö¡ÊýÎª950, ÎóÖ¡ÂÊPER=2.84211e-01,ÎóÂëÂÊBER=3.42105e-05
RaptorÂë£¬µ±Ç°¿ªÏú=1.50,µ±Ç°Ö¡ÊýÎª950, ÎóÖ¡ÂÊPER=0.00000e+00,ÎóÂëÂÊBER=0.00000e+00
LTÂë£¬µ±Ç°¿ªÏú=1.50,µ±Ç°Ö¡ÊýÎª1000, ÎóÖ¡ÂÊPER=2.84000e-01,ÎóÂëÂÊBER=3.42000e-05
RaptorÂë£¬µ±Ç°¿ªÏú=1.50,µ±Ç°Ö¡ÊýÎª1000, ÎóÖ¡ÂÊPER=0.00000e+00,ÎóÂëÂÊBER=0.00000e+00
LTÂë£¬µ±Ç°¿ªÏú=1.50,µ±Ç°Ö¡ÊýÎª1050, ÎóÖ¡ÂÊPER=2.81905e-01,ÎóÂëÂÊBER=3.37143e-05
RaptorÂë£¬µ±Ç°¿ªÏú=1.50,µ±Ç°Ö¡ÊýÎª1050, ÎóÖ¡ÂÊPER=0.00000e+00,ÎóÂëÂÊBER=0.00000e+00
LTÂë£¬µ±Ç°¿ªÏú=1.50,µ±Ç°Ö¡ÊýÎª1100, ÎóÖ¡ÂÊPER=2.80000e-01,ÎóÂëÂÊBER=3.34545e-05
RaptorÂë£¬µ±Ç°¿ªÏú=1.50,µ±Ç°Ö¡ÊýÎª1100, ÎóÖ¡ÂÊPER=0.00000e+00,ÎóÂëÂÊBER=0.00000e+00
LTÂë£¬µ±Ç°¿ªÏú=1.50,µ±Ç°Ö¡ÊýÎª1150, ÎóÖ¡ÂÊPER=2.73913e-01,ÎóÂëÂÊBER=3.26087e-05
RaptorÂë£¬µ±Ç°¿ªÏú=1.50,µ±Ç°Ö¡ÊýÎª1150, ÎóÖ¡ÂÊPER=0.00000e+00,ÎóÂëÂÊBER=0.00000e+00
LTÂë£¬µ±Ç°¿ªÏú=1.50,µ±Ç°Ö¡ÊýÎª1200, ÎóÖ¡ÂÊPER=2.74167e-01,ÎóÂëÂÊBER=3.26667e-05
RaptorÂë£¬µ±Ç°¿ªÏú=1.50,µ±Ç°Ö¡ÊýÎª1200, ÎóÖ¡ÂÊPER=0.00000e+00,ÎóÂëÂÊBER=0.00000e+00
LTÂë£¬µ±Ç°¿ªÏú=1.50,µ±Ç°Ö¡ÊýÎª1250, ÎóÖ¡ÂÊPER=2.74400e-01,ÎóÂëÂÊBER=3.25600e-05
RaptorÂë£¬µ±Ç°¿ªÏú=1.50,µ±Ç°Ö¡ÊýÎª1250, ÎóÖ¡ÂÊPER=0.00000e+00,ÎóÂëÂÊBER=0.00000e+00
LTÂë£¬µ±Ç°¿ªÏú=1.50,µ±Ç°Ö¡ÊýÎª1300, ÎóÖ¡ÂÊPER=2.70000e-01,ÎóÂëÂÊBER=3.21538e-05
RaptorÂë£¬µ±Ç°¿ªÏú=1.50,µ±Ç°Ö¡ÊýÎª1300, ÎóÖ¡ÂÊPER=0.00000e+00,ÎóÂëÂÊBER=0.00000e+00
LTÂë£¬µ±Ç°¿ªÏú=1.50,µ±Ç°Ö¡ÊýÎª1350, ÎóÖ¡ÂÊPER=2.69630e-01,ÎóÂëÂÊBER=3.20000e-05
RaptorÂë£¬µ±Ç°¿ªÏú=1.50,µ±Ç°Ö¡ÊýÎª1350, ÎóÖ¡ÂÊPER=0.00000e+00,ÎóÂëÂÊBER=0.00000e+00
LTÂë£¬µ±Ç°¿ªÏú=1.50,µ±Ç°Ö¡ÊýÎª1400, ÎóÖ¡ÂÊPER=2.72143e-01,ÎóÂëÂÊBER=3.22143e-05
RaptorÂë£¬µ±Ç°¿ªÏú=1.50,µ±Ç°Ö¡ÊýÎª1400, ÎóÖ¡ÂÊPER=0.00000e+00,ÎóÂëÂÊBER=0.00000e+00
LTÂë£¬µ±Ç°¿ªÏú=1.50,µ±Ç°Ö¡ÊýÎª1450, ÎóÖ¡ÂÊPER=2.71724e-01,ÎóÂëÂÊBER=3.22069e-05
RaptorÂë£¬µ±Ç°¿ªÏú=1.50,µ±Ç°Ö¡ÊýÎª1450, ÎóÖ¡ÂÊPER=0.00000e+00,ÎóÂëÂÊBER=0.00000e+00
LTÂë£¬µ±Ç°¿ªÏú=1.50,µ±Ç°Ö¡ÊýÎª1500, ÎóÖ¡ÂÊPER=2.71333e-01,ÎóÂëÂÊBER=3.24000e-05
RaptorÂë£¬µ±Ç°¿ªÏú=1.50,µ±Ç°Ö¡ÊýÎª1500, ÎóÖ¡ÂÊPER=0.00000e+00,ÎóÂëÂÊBER=0.00000e+00
LTÂë£¬µ±Ç°¿ªÏú=1.50,µ±Ç°Ö¡ÊýÎª1550, ÎóÖ¡ÂÊPER=2.70323e-01,ÎóÂëÂÊBER=3.24516e-05
RaptorÂë£¬µ±Ç°¿ªÏú=1.50,µ±Ç°Ö¡ÊýÎª1550, ÎóÖ¡ÂÊPER=0.00000e+00,ÎóÂëÂÊBER=0.00000e+00
LTÂë£¬µ±Ç°¿ªÏú=1.50,µ±Ç°Ö¡ÊýÎª1600, ÎóÖ¡ÂÊPER=2.71250e-01,ÎóÂëÂÊBER=3.25000e-05
RaptorÂë£¬µ±Ç°¿ªÏú=1.50,µ±Ç°Ö¡ÊýÎª1600, ÎóÖ¡ÂÊPER=0.00000e+00,ÎóÂëÂÊBER=0.00000e+00
LTÂë£¬µ±Ç°¿ªÏú=1.50,µ±Ç°Ö¡ÊýÎª1650, ÎóÖ¡ÂÊPER=2.69091e-01,ÎóÂëÂÊBER=3.23030e-05
RaptorÂë£¬µ±Ç°¿ªÏú=1.50,µ±Ç°Ö¡ÊýÎª1650, ÎóÖ¡ÂÊPER=0.00000e+00,ÎóÂëÂÊBER=0.00000e+00
LTÂë£¬µ±Ç°¿ªÏú=1.50,µ±Ç°Ö¡ÊýÎª1700, ÎóÖ¡ÂÊPER=2.66471e-01,ÎóÂëÂÊBER=3.20000e-05
RaptorÂë£¬µ±Ç°¿ªÏú=1.50,µ±Ç°Ö¡ÊýÎª1700, ÎóÖ¡ÂÊPER=0.00000e+00,ÎóÂëÂÊBER=0.00000e+00
LTÂë£¬µ±Ç°¿ªÏú=1.50,µ±Ç°Ö¡ÊýÎª1750, ÎóÖ¡ÂÊPER=2.65143e-01,ÎóÂëÂÊBER=3.19429e-05
RaptorÂë£¬µ±Ç°¿ªÏú=1.50,µ±Ç°Ö¡ÊýÎª1750, ÎóÖ¡ÂÊPER=0.00000e+00,ÎóÂëÂÊBER=0.00000e+00
LTÂë£¬µ±Ç°¿ªÏú=1.50,µ±Ç°Ö¡ÊýÎª1800, ÎóÖ¡ÂÊPER=2.67778e-01,ÎóÂëÂÊBER=3.22778e-05
RaptorÂë£¬µ±Ç°¿ªÏú=1.50,µ±Ç°Ö¡ÊýÎª1800, ÎóÖ¡ÂÊPER=0.00000e+00,ÎóÂëÂÊBER=0.00000e+00
LTÂë£¬µ±Ç°¿ªÏú=1.50,µ±Ç°Ö¡ÊýÎª1850, ÎóÖ¡ÂÊPER=2.68108e-01,ÎóÂëÂÊBER=3.25946e-05
RaptorÂë£¬µ±Ç°¿ªÏú=1.50,µ±Ç°Ö¡ÊýÎª1850, ÎóÖ¡ÂÊPER=0.00000e+00,ÎóÂëÂÊBER=0.00000e+00
LTÂë£¬µ±Ç°¿ªÏú=1.50,µ±Ç°Ö¡ÊýÎª1900, ÎóÖ¡ÂÊPER=2.69474e-01,ÎóÂëÂÊBER=3.26842e-05
RaptorÂë£¬µ±Ç°¿ªÏú=1.50,µ±Ç°Ö¡ÊýÎª1900, ÎóÖ¡ÂÊPER=0.00000e+00,ÎóÂëÂÊBER=0.00000e+00
LTÂë£¬µ±Ç°¿ªÏú=1.50,µ±Ç°Ö¡ÊýÎª1950, ÎóÖ¡ÂÊPER=2.68205e-01,ÎóÂëÂÊBER=3.26667e-05
RaptorÂë£¬µ±Ç°¿ªÏú=1.50,µ±Ç°Ö¡ÊýÎª1950, ÎóÖ¡ÂÊPER=0.00000e+00,ÎóÂëÂÊBER=0.00000e+00
LTÂë£¬µ±Ç°¿ªÏú=1.50,µ±Ç°Ö¡ÊýÎª2000, ÎóÖ¡ÂÊPER=2.70500e-01,ÎóÂëÂÊBER=3.29000e-05
RaptorÂë£¬µ±Ç°¿ªÏú=1.50,µ±Ç°Ö¡ÊýÎª2000, ÎóÖ¡ÂÊPER=0.00000e+00,ÎóÂëÂÊBER=0.00000e+00
µ±Ç°ÐÅµÀ±ê×¼²î=100.00,¿ªÏú=1.50,µ±Ç°Ö¡ÊýÎª2000, LTÂëÎóÂëÂÊBER_LT=3.29000e-05,RaptorÎóÂëÂÊBER=0.00000e+00
LTÂë£¬µ±Ç°¿ªÏú=1.60,µ±Ç°Ö¡ÊýÎª50, ÎóÖ¡ÂÊPER=1.40000e-01,ÎóÂëÂÊBER=1.60000e-05
RaptorÂë£¬µ±Ç°¿ªÏú=1.60,µ±Ç°Ö¡ÊýÎª50, ÎóÖ¡ÂÊPER=0.00000e+00,ÎóÂëÂÊBER=0.00000e+00
LTÂë£¬µ±Ç°¿ªÏú=1.60,µ±Ç°Ö¡ÊýÎª100, ÎóÖ¡ÂÊPER=1.30000e-01,ÎóÂëÂÊBER=1.50000e-05
RaptorÂë£¬µ±Ç°¿ªÏú=1.60,µ±Ç°Ö¡ÊýÎª100, ÎóÖ¡ÂÊPER=0.00000e+00,ÎóÂëÂÊBER=0.00000e+00
LTÂë£¬µ±Ç°¿ªÏú=1.60,µ±Ç°Ö¡ÊýÎª150, ÎóÖ¡ÂÊPER=1.20000e-01,ÎóÂëÂÊBER=1.40000e-05
RaptorÂë£¬µ±Ç°¿ªÏú=1.60,µ±Ç°Ö¡ÊýÎª150, ÎóÖ¡ÂÊPER=0.00000e+00,ÎóÂëÂÊBER=0.00000e+00
LTÂë£¬µ±Ç°¿ªÏú=1.60,µ±Ç°Ö¡ÊýÎª200, ÎóÖ¡ÂÊPER=1.30000e-01,ÎóÂëÂÊBER=1.50000e-05
RaptorÂë£¬µ±Ç°¿ªÏú=1.60,µ±Ç°Ö¡ÊýÎª200, ÎóÖ¡ÂÊPER=0.00000e+00,ÎóÂëÂÊBER=0.00000e+00
LTÂë£¬µ±Ç°¿ªÏú=1.60,µ±Ç°Ö¡ÊýÎª250, ÎóÖ¡ÂÊPER=1.56000e-01,ÎóÂëÂÊBER=1.80000e-05
RaptorÂë£¬µ±Ç°¿ªÏú=1.60,µ±Ç°Ö¡ÊýÎª250, ÎóÖ¡ÂÊPER=0.00000e+00,ÎóÂëÂÊBER=0.00000e+00
LTÂë£¬µ±Ç°¿ªÏú=1.60,µ±Ç°Ö¡ÊýÎª300, ÎóÖ¡ÂÊPER=1.53333e-01,ÎóÂëÂÊBER=1.73333e-05
RaptorÂë£¬µ±Ç°¿ªÏú=1.60,µ±Ç°Ö¡ÊýÎª300, ÎóÖ¡ÂÊPER=0.00000e+00,ÎóÂëÂÊBER=0.00000e+00
LTÂë£¬µ±Ç°¿ªÏú=1.60,µ±Ç°Ö¡ÊýÎª350, ÎóÖ¡ÂÊPER=1.51429e-01,ÎóÂëÂÊBER=1.68571e-05
RaptorÂë£¬µ±Ç°¿ªÏú=1.60,µ±Ç°Ö¡ÊýÎª350, ÎóÖ¡ÂÊPER=0.00000e+00,ÎóÂëÂÊBER=0.00000e+00
LTÂë£¬µ±Ç°¿ªÏú=1.60,µ±Ç°Ö¡ÊýÎª400, ÎóÖ¡ÂÊPER=1.47500e-01,ÎóÂëÂÊBER=1.62500e-05
RaptorÂë£¬µ±Ç°¿ªÏú=1.60,µ±Ç°Ö¡ÊýÎª400, ÎóÖ¡ÂÊPER=0.00000e+00,ÎóÂëÂÊBER=0.00000e+00
LTÂë£¬µ±Ç°¿ªÏú=1.60,µ±Ç°Ö¡ÊýÎª450, ÎóÖ¡ÂÊPER=1.55556e-01,ÎóÂëÂÊBER=1.68889e-05
RaptorÂë£¬µ±Ç°¿ªÏú=1.60,µ±Ç°Ö¡ÊýÎª450, ÎóÖ¡ÂÊPER=0.00000e+00,ÎóÂëÂÊBER=0.00000e+00
LTÂë£¬µ±Ç°¿ªÏú=1.60,µ±Ç°Ö¡ÊýÎª500, ÎóÖ¡ÂÊPER=1.56000e-01,ÎóÂëÂÊBER=1.72000e-05
RaptorÂë£¬µ±Ç°¿ªÏú=1.60,µ±Ç°Ö¡ÊýÎª500, ÎóÖ¡ÂÊPER=0.00000e+00,ÎóÂëÂÊBER=0.00000e+00
LTÂë£¬µ±Ç°¿ªÏú=1.60,µ±Ç°Ö¡ÊýÎª550, ÎóÖ¡ÂÊPER=1.65455e-01,ÎóÂëÂÊBER=1.81818e-05
RaptorÂë£¬µ±Ç°¿ªÏú=1.60,µ±Ç°Ö¡ÊýÎª550, ÎóÖ¡ÂÊPER=0.00000e+00,ÎóÂëÂÊBER=0.00000e+00
LTÂë£¬µ±Ç°¿ªÏú=1.60,µ±Ç°Ö¡ÊýÎª600, ÎóÖ¡ÂÊPER=1.65000e-01,ÎóÂëÂÊBER=1.80000e-05
RaptorÂë£¬µ±Ç°¿ªÏú=1.60,µ±Ç°Ö¡ÊýÎª600, ÎóÖ¡ÂÊPER=0.00000e+00,ÎóÂëÂÊBER=0.00000e+00
LTÂë£¬µ±Ç°¿ªÏú=1.60,µ±Ç°Ö¡ÊýÎª650, ÎóÖ¡ÂÊPER=1.64615e-01,ÎóÂëÂÊBER=1.80000e-05
RaptorÂë£¬µ±Ç°¿ªÏú=1.60,µ±Ç°Ö¡ÊýÎª650, ÎóÖ¡ÂÊPER=0.00000e+00,ÎóÂëÂÊBER=0.00000e+00
LTÂë£¬µ±Ç°¿ªÏú=1.60,µ±Ç°Ö¡ÊýÎª700, ÎóÖ¡ÂÊPER=1.58571e-01,ÎóÂëÂÊBER=1.72857e-05
RaptorÂë£¬µ±Ç°¿ªÏú=1.60,µ±Ç°Ö¡ÊýÎª700, ÎóÖ¡ÂÊPER=0.00000e+00,ÎóÂëÂÊBER=0.00000e+00
LTÂë£¬µ±Ç°¿ªÏú=1.60,µ±Ç°Ö¡ÊýÎª750, ÎóÖ¡ÂÊPER=1.53333e-01,ÎóÂëÂÊBER=1.66667e-05
RaptorÂë£¬µ±Ç°¿ªÏú=1.60,µ±Ç°Ö¡ÊýÎª750, ÎóÖ¡ÂÊPER=0.00000e+00,ÎóÂëÂÊBER=0.00000e+00
LTÂë£¬µ±Ç°¿ªÏú=1.60,µ±Ç°Ö¡ÊýÎª800, ÎóÖ¡ÂÊPER=1.53750e-01,ÎóÂëÂÊBER=1.66250e-05
RaptorÂë£¬µ±Ç°¿ªÏú=1.60,µ±Ç°Ö¡ÊýÎª800, ÎóÖ¡ÂÊPER=0.00000e+00,ÎóÂëÂÊBER=0.00000e+00
LTÂë£¬µ±Ç°¿ªÏú=1.60,µ±Ç°Ö¡ÊýÎª850, ÎóÖ¡ÂÊPER=1.51765e-01,ÎóÂëÂÊBER=1.64706e-05
RaptorÂë£¬µ±Ç°¿ªÏú=1.60,µ±Ç°Ö¡ÊýÎª850, ÎóÖ¡ÂÊPER=0.00000e+00,ÎóÂëÂÊBER=0.00000e+00
LTÂë£¬µ±Ç°¿ªÏú=1.60,µ±Ç°Ö¡ÊýÎª900, ÎóÖ¡ÂÊPER=1.46667e-01,ÎóÂëÂÊBER=1.58889e-05
RaptorÂë£¬µ±Ç°¿ªÏú=1.60,µ±Ç°Ö¡ÊýÎª900, ÎóÖ¡ÂÊPER=0.00000e+00,ÎóÂëÂÊBER=0.00000e+00
LTÂë£¬µ±Ç°¿ªÏú=1.60,µ±Ç°Ö¡ÊýÎª950, ÎóÖ¡ÂÊPER=1.50526e-01,ÎóÂëÂÊBER=1.62105e-05
RaptorÂë£¬µ±Ç°¿ªÏú=1.60,µ±Ç°Ö¡ÊýÎª950, ÎóÖ¡ÂÊPER=0.00000e+00,ÎóÂëÂÊBER=0.00000e+00
LTÂë£¬µ±Ç°¿ªÏú=1.60,µ±Ç°Ö¡ÊýÎª1000, ÎóÖ¡ÂÊPER=1.49000e-01,ÎóÂëÂÊBER=1.61000e-05
RaptorÂë£¬µ±Ç°¿ªÏú=1.60,µ±Ç°Ö¡ÊýÎª1000, ÎóÖ¡ÂÊPER=0.00000e+00,ÎóÂëÂÊBER=0.00000e+00
LTÂë£¬µ±Ç°¿ªÏú=1.60,µ±Ç°Ö¡ÊýÎª1050, ÎóÖ¡ÂÊPER=1.49524e-01,ÎóÂëÂÊBER=1.60952e-05
RaptorÂë£¬µ±Ç°¿ªÏú=1.60,µ±Ç°Ö¡ÊýÎª1050, ÎóÖ¡ÂÊPER=0.00000e+00,ÎóÂëÂÊBER=0.00000e+00
LTÂë£¬µ±Ç°¿ªÏú=1.60,µ±Ç°Ö¡ÊýÎª1100, ÎóÖ¡ÂÊPER=1.50909e-01,ÎóÂëÂÊBER=1.62727e-05
RaptorÂë£¬µ±Ç°¿ªÏú=1.60,µ±Ç°Ö¡ÊýÎª1100, ÎóÖ¡ÂÊPER=0.00000e+00,ÎóÂëÂÊBER=0.00000e+00
LTÂë£¬µ±Ç°¿ªÏú=1.60,µ±Ç°Ö¡ÊýÎª1150, ÎóÖ¡ÂÊPER=1.50435e-01,ÎóÂëÂÊBER=1.61739e-05
RaptorÂë£¬µ±Ç°¿ªÏú=1.60,µ±Ç°Ö¡ÊýÎª1150, ÎóÖ¡ÂÊPER=0.00000e+00,ÎóÂëÂÊBER=0.00000e+00
LTÂë£¬µ±Ç°¿ªÏú=1.60,µ±Ç°Ö¡ÊýÎª1200, ÎóÖ¡ÂÊPER=1.48333e-01,ÎóÂëÂÊBER=1.60000e-05
RaptorÂë£¬µ±Ç°¿ªÏú=1.60,µ±Ç°Ö¡ÊýÎª1200, ÎóÖ¡ÂÊPER=0.00000e+00,ÎóÂëÂÊBER=0.00000e+00
LTÂë£¬µ±Ç°¿ªÏú=1.60,µ±Ç°Ö¡ÊýÎª1250, ÎóÖ¡ÂÊPER=1.49600e-01,ÎóÂëÂÊBER=1.60800e-05
RaptorÂë£¬µ±Ç°¿ªÏú=1.60,µ±Ç°Ö¡ÊýÎª1250, ÎóÖ¡ÂÊPER=0.00000e+00,ÎóÂëÂÊBER=0.00000e+00
LTÂë£¬µ±Ç°¿ªÏú=1.60,µ±Ç°Ö¡ÊýÎª1300, ÎóÖ¡ÂÊPER=1.51538e-01,ÎóÂëÂÊBER=1.64615e-05
RaptorÂë£¬µ±Ç°¿ªÏú=1.60,µ±Ç°Ö¡ÊýÎª1300, ÎóÖ¡ÂÊPER=0.00000e+00,ÎóÂëÂÊBER=0.00000e+00
LTÂë£¬µ±Ç°¿ªÏú=1.60,µ±Ç°Ö¡ÊýÎª1350, ÎóÖ¡ÂÊPER=1.49630e-01,ÎóÂëÂÊBER=1.62963e-05
RaptorÂë£¬µ±Ç°¿ªÏú=1.60,µ±Ç°Ö¡ÊýÎª1350, ÎóÖ¡ÂÊPER=0.00000e+00,ÎóÂëÂÊBER=0.00000e+00
LTÂë£¬µ±Ç°¿ªÏú=1.60,µ±Ç°Ö¡ÊýÎª1400, ÎóÖ¡ÂÊPER=1.52143e-01,ÎóÂëÂÊBER=1.69286e-05
RaptorÂë£¬µ±Ç°¿ªÏú=1.60,µ±Ç°Ö¡ÊýÎª1400, ÎóÖ¡ÂÊPER=0.00000e+00,ÎóÂëÂÊBER=0.00000e+00
LTÂë£¬µ±Ç°¿ªÏú=1.60,µ±Ç°Ö¡ÊýÎª1450, ÎóÖ¡ÂÊPER=1.48966e-01,ÎóÂëÂÊBER=1.65517e-05
RaptorÂë£¬µ±Ç°¿ªÏú=1.60,µ±Ç°Ö¡ÊýÎª1450, ÎóÖ¡ÂÊPER=0.00000e+00,ÎóÂëÂÊBER=0.00000e+00
LTÂë£¬µ±Ç°¿ªÏú=1.60,µ±Ç°Ö¡ÊýÎª1500, ÎóÖ¡ÂÊPER=1.51333e-01,ÎóÂëÂÊBER=1.68667e-05
RaptorÂë£¬µ±Ç°¿ªÏú=1.60,µ±Ç°Ö¡ÊýÎª1500, ÎóÖ¡ÂÊPER=0.00000e+00,ÎóÂëÂÊBER=0.00000e+00
LTÂë£¬µ±Ç°¿ªÏú=1.60,µ±Ç°Ö¡ÊýÎª1550, ÎóÖ¡ÂÊPER=1.49677e-01,ÎóÂëÂÊBER=1.66452e-05
RaptorÂë£¬µ±Ç°¿ªÏú=1.60,µ±Ç°Ö¡ÊýÎª1550, ÎóÖ¡ÂÊPER=0.00000e+00,ÎóÂëÂÊBER=0.00000e+00
LTÂë£¬µ±Ç°¿ªÏú=1.60,µ±Ç°Ö¡ÊýÎª1600, ÎóÖ¡ÂÊPER=1.49375e-01,ÎóÂëÂÊBER=1.66875e-05
RaptorÂë£¬µ±Ç°¿ªÏú=1.60,µ±Ç°Ö¡ÊýÎª1600, ÎóÖ¡ÂÊPER=0.00000e+00,ÎóÂëÂÊBER=0.00000e+00
{²Ù×÷ÔÚÒÔÏÂ¹ý³ÌÖÐ±»ÓÃ»§ÖÕÖ¹ <a href="matlab:matlab.internal.language.introspective.errorDocCallback('sys_LT_Log_SP_decode', 'E:\Ñ§Êõ\ÂÛÎÄ\20190731ÏµÍ³ÂëÏà¸É·ÇÏà¸ÉGA»¥ÐÅÏ¢·½·¨\³ÌÐò\Copy_of_Êµ¼ÊÂë×ÖÐÔÄÜ·ÂÕæ\sys_LT_Log_SP_decode.m', 37)" style="font-weight:bold">sys_LT_Log_SP_decode</a> (<a href="matlab: opentoline('E:\Ñ§Êõ\ÂÛÎÄ\20190731ÏµÍ³ÂëÏà¸É·ÇÏà¸ÉGA»¥ÐÅÏ¢·½·¨\³ÌÐò\Copy_of_Êµ¼ÊÂë×ÖÐÔÄÜ·ÂÕæ\sys_LT_Log_SP_decode.m',37,0)">line 37</a>)


Î»ÖÃ <a href="matlab:matlab.internal.language.introspective.errorDocCallback('Main_Raptor_enc_dec', 'E:\Ñ§Êõ\ÂÛÎÄ\20190731ÏµÍ³ÂëÏà¸É·ÇÏà¸ÉGA»¥ÐÅÏ¢·½·¨\³ÌÐò\Copy_of_Êµ¼ÊÂë×ÖÐÔÄÜ·ÂÕæ\Main_Raptor_enc_dec.m', 214)" style="font-weight:bold">Main_Raptor_enc_dec</a> (<a href="matlab: opentoline('E:\Ñ§Êõ\ÂÛÎÄ\20190731ÏµÍ³ÂëÏà¸É·ÇÏà¸ÉGA»¥ÐÅÏ¢·½·¨\³ÌÐò\Copy_of_Êµ¼ÊÂë×ÖÐÔÄÜ·ÂÕæ\Main_Raptor_enc_dec.m',214,0)">line 214</a>)
            [d_code,success_LT,soft_LT_msg,k] = sys_LT_Log_SP_decode(L_rate,H,iter_num_LT);
} 
toc
Ê±¼äÒÑ¹ý 254756.786625 Ãë¡£
diary off
