# Supplementary material for: An Efficient Design of Systematic Rateless Codes
Source: Hindawi journal article supplement (doi:10.1155/2020/8068414), 2020-05-19
Supplement: f1 [file 8068414.f1.zip › supplementary files/Matlab_code_for_Figure1/BER_by_Simulation/实际码字结果/AWGN_dist2016977_K9800_S_part2.txt]

20190612²âÊÔËõÐ¡ÄÚÂëÊä³öLLRÐ§¹û£¬ÇÒËõ¼õÒò×ÓÎª

zoom_in =

     1


rho =

     0


sigma_n_2 =

   0.954529000000000


sigma_vec =

   Inf


dist_num =

     2.016977000000000e+03

µ±Ç°ÐÅµÀÎªPBIÐÅµÀ
K =

        9800


out_node_index =

  1 ÖÁ 18 ÁÐ

     1     2     3     4     5     6     7     8     9    10    11    12    13    14    15    16    17    18

  19 ÖÁ 21 ÁÐ

    19    20   200


out_node_degree =

  1 ÖÁ 5 ÁÐ

   0.004400000000000   0.004600000000000   0.005500000000000   0.004800000000000   0.332700000000000

  6 ÖÁ 10 ÁÐ

   0.414300000000000   0.087500000000000   0.075800000000000   0.005900000000000   0.005000000000000

  11 ÖÁ 15 ÁÐ

   0.005400000000000   0.005900000000000   0.004700000000000   0.003400000000000   0.002600000000000

  16 ÖÁ 20 ÁÐ

   0.001200000000000   0.001000000000000   0.000800000000000   0.000600000000000   0.000300000000000

  21 ÖÁ 25 ÁÐ

                   0                   0                   0                   0                   0

  26 ÖÁ 30 ÁÐ

                   0                   0                   0                   0                   0

  31 ÖÁ 35 ÁÐ

                   0                   0                   0                   0                   0

  36 ÖÁ 40 ÁÐ

                   0                   0                   0                   0                   0

  41 ÖÁ 45 ÁÐ

                   0                   0                   0                   0                   0

  46 ÖÁ 50 ÁÐ

                   0                   0                   0                   0                   0

  51 ÖÁ 55 ÁÐ

                   0                   0                   0                   0                   0

  56 ÖÁ 60 ÁÐ

                   0                   0                   0                   0                   0

  61 ÖÁ 65 ÁÐ

                   0                   0                   0                   0                   0

  66 ÖÁ 70 ÁÐ

                   0                   0                   0                   0                   0

  71 ÖÁ 75 ÁÐ

                   0                   0                   0                   0                   0

  76 ÖÁ 80 ÁÐ

                   0                   0                   0                   0                   0

  81 ÖÁ 85 ÁÐ

                   0                   0                   0                   0                   0

  86 ÖÁ 90 ÁÐ

                   0                   0                   0                   0                   0

  91 ÖÁ 95 ÁÐ

                   0                   0                   0                   0                   0

  96 ÖÁ 100 ÁÐ

                   0                   0                   0                   0                   0

  101 ÖÁ 105 ÁÐ

                   0                   0                   0                   0                   0

  106 ÖÁ 110 ÁÐ

                   0                   0                   0                   0                   0

  111 ÖÁ 115 ÁÐ

                   0                   0                   0                   0                   0

  116 ÖÁ 120 ÁÐ

                   0                   0                   0                   0                   0

  121 ÖÁ 125 ÁÐ

                   0                   0                   0                   0                   0

  126 ÖÁ 130 ÁÐ

                   0                   0                   0                   0                   0

  131 ÖÁ 135 ÁÐ

                   0                   0                   0                   0                   0

  136 ÖÁ 140 ÁÐ

                   0                   0                   0                   0                   0

  141 ÖÁ 145 ÁÐ

                   0                   0                   0                   0                   0

  146 ÖÁ 150 ÁÐ

                   0                   0                   0                   0                   0

  151 ÖÁ 155 ÁÐ

                   0                   0                   0                   0                   0

  156 ÖÁ 160 ÁÐ

                   0                   0                   0                   0                   0

  161 ÖÁ 165 ÁÐ

                   0                   0                   0                   0                   0

  166 ÖÁ 170 ÁÐ

                   0                   0                   0                   0                   0

  171 ÖÁ 175 ÁÐ

                   0                   0                   0                   0                   0

  176 ÖÁ 180 ÁÐ

                   0                   0                   0                   0                   0

  181 ÖÁ 185 ÁÐ

                   0                   0                   0                   0                   0

  186 ÖÁ 190 ÁÐ

                   0                   0                   0                   0                   0

  191 ÖÁ 195 ÁÐ

                   0                   0                   0                   0                   0

  196 ÖÁ 200 ÁÐ

                   0                   0                   0                   0   0.033200000000000

ÕýÔÚ¶ÔÍâÂë½øÐÐÏßÐÔPEG±àÂë£¬ÇëÉÔµÈ...
µ±Ç°Ñ¡ÔñµÄÊÇÏµÍ³Âë
´íÎó±ÈÌØÊýºÍÖ¡Êý¶¼´ïµ½Ò»¶¨Á¿£¬ÐèÒªÔö¼Ó¿ªÏú
µ±Ç°ÐÅµÀ±ê×¼²î=100.00,¿ªÏú=0.50,µ±Ç°Ö¡ÊýÎª20, LTÂëÎóÂëÂÊBER_LT=1.35735e-01,RaptorÎóÂëÂÊBER=1.35679e-01
´íÎó±ÈÌØÊýºÍÖ¡Êý¶¼´ïµ½Ò»¶¨Á¿£¬ÐèÒªÔö¼Ó¿ªÏú
µ±Ç°ÐÅµÀ±ê×¼²î=100.00,¿ªÏú=0.60,µ±Ç°Ö¡ÊýÎª20, LTÂëÎóÂëÂÊBER_LT=1.33040e-01,RaptorÎóÂëÂÊBER=1.33224e-01
´íÎó±ÈÌØÊýºÍÖ¡Êý¶¼´ïµ½Ò»¶¨Á¿£¬ÐèÒªÔö¼Ó¿ªÏú
µ±Ç°ÐÅµÀ±ê×¼²î=100.00,¿ªÏú=0.70,µ±Ç°Ö¡ÊýÎª20, LTÂëÎóÂëÂÊBER_LT=1.26365e-01,RaptorÎóÂëÂÊBER=1.26316e-01
´íÎó±ÈÌØÊýºÍÖ¡Êý¶¼´ïµ½Ò»¶¨Á¿£¬ÐèÒªÔö¼Ó¿ªÏú
µ±Ç°ÐÅµÀ±ê×¼²î=100.00,¿ªÏú=0.80,µ±Ç°Ö¡ÊýÎª20, LTÂëÎóÂëÂÊBER_LT=1.15315e-01,RaptorÎóÂëÂÊBER=1.15219e-01
´íÎó±ÈÌØÊýºÍÖ¡Êý¶¼´ïµ½Ò»¶¨Á¿£¬ÐèÒªÔö¼Ó¿ªÏú
µ±Ç°ÐÅµÀ±ê×¼²î=100.00,¿ªÏú=0.90,µ±Ç°Ö¡ÊýÎª20, LTÂëÎóÂëÂÊBER_LT=1.02045e-01,RaptorÎóÂëÂÊBER=1.01888e-01
´íÎó±ÈÌØÊýºÍÖ¡Êý¶¼´ïµ½Ò»¶¨Á¿£¬ÐèÒªÔö¼Ó¿ªÏú
µ±Ç°ÐÅµÀ±ê×¼²î=100.00,¿ªÏú=1.00,µ±Ç°Ö¡ÊýÎª20, LTÂëÎóÂëÂÊBER_LT=5.15250e-02,RaptorÎóÂëÂÊBER=5.15510e-02
´íÎó±ÈÌØÊýºÍÖ¡Êý¶¼´ïµ½Ò»¶¨Á¿£¬ÐèÒªÔö¼Ó¿ªÏú
µ±Ç°ÐÅµÀ±ê×¼²î=100.00,¿ªÏú=1.10,µ±Ç°Ö¡ÊýÎª20, LTÂëÎóÂëÂÊBER_LT=1.46100e-02,RaptorÎóÂëÂÊBER=1.45816e-02
LTÂë£¬µ±Ç°¿ªÏú=1.70,µ±Ç°Ö¡ÊýÎª50, ÎóÖ¡ÂÊPER=8.00000e-02,ÎóÂëÂÊBER=1.00000e-05
RaptorÂë£¬µ±Ç°¿ªÏú=1.70,µ±Ç°Ö¡ÊýÎª50, ÎóÖ¡ÂÊPER=0.00000e+00,ÎóÂëÂÊBER=0.00000e+00
LTÂë£¬µ±Ç°¿ªÏú=1.70,µ±Ç°Ö¡ÊýÎª100, ÎóÖ¡ÂÊPER=8.00000e-02,ÎóÂëÂÊBER=9.00000e-06
RaptorÂë£¬µ±Ç°¿ªÏú=1.70,µ±Ç°Ö¡ÊýÎª100, ÎóÖ¡ÂÊPER=0.00000e+00,ÎóÂëÂÊBER=0.00000e+00
LTÂë£¬µ±Ç°¿ªÏú=1.70,µ±Ç°Ö¡ÊýÎª150, ÎóÖ¡ÂÊPER=7.33333e-02,ÎóÂëÂÊBER=8.00000e-06
RaptorÂë£¬µ±Ç°¿ªÏú=1.70,µ±Ç°Ö¡ÊýÎª150, ÎóÖ¡ÂÊPER=0.00000e+00,ÎóÂëÂÊBER=0.00000e+00
LTÂë£¬µ±Ç°¿ªÏú=1.70,µ±Ç°Ö¡ÊýÎª200, ÎóÖ¡ÂÊPER=7.00000e-02,ÎóÂëÂÊBER=7.50000e-06
RaptorÂë£¬µ±Ç°¿ªÏú=1.70,µ±Ç°Ö¡ÊýÎª200, ÎóÖ¡ÂÊPER=0.00000e+00,ÎóÂëÂÊBER=0.00000e+00
LTÂë£¬µ±Ç°¿ªÏú=1.70,µ±Ç°Ö¡ÊýÎª250, ÎóÖ¡ÂÊPER=6.40000e-02,ÎóÂëÂÊBER=7.20000e-06
RaptorÂë£¬µ±Ç°¿ªÏú=1.70,µ±Ç°Ö¡ÊýÎª250, ÎóÖ¡ÂÊPER=0.00000e+00,ÎóÂëÂÊBER=0.00000e+00
LTÂë£¬µ±Ç°¿ªÏú=1.70,µ±Ç°Ö¡ÊýÎª300, ÎóÖ¡ÂÊPER=7.00000e-02,ÎóÂëÂÊBER=7.66667e-06
RaptorÂë£¬µ±Ç°¿ªÏú=1.70,µ±Ç°Ö¡ÊýÎª300, ÎóÖ¡ÂÊPER=0.00000e+00,ÎóÂëÂÊBER=0.00000e+00
LTÂë£¬µ±Ç°¿ªÏú=1.70,µ±Ç°Ö¡ÊýÎª350, ÎóÖ¡ÂÊPER=7.71429e-02,ÎóÂëÂÊBER=8.28571e-06
RaptorÂë£¬µ±Ç°¿ªÏú=1.70,µ±Ç°Ö¡ÊýÎª350, ÎóÖ¡ÂÊPER=0.00000e+00,ÎóÂëÂÊBER=0.00000e+00
LTÂë£¬µ±Ç°¿ªÏú=1.70,µ±Ç°Ö¡ÊýÎª400, ÎóÖ¡ÂÊPER=8.25000e-02,ÎóÂëÂÊBER=8.75000e-06
RaptorÂë£¬µ±Ç°¿ªÏú=1.70,µ±Ç°Ö¡ÊýÎª400, ÎóÖ¡ÂÊPER=0.00000e+00,ÎóÂëÂÊBER=0.00000e+00
LTÂë£¬µ±Ç°¿ªÏú=1.70,µ±Ç°Ö¡ÊýÎª450, ÎóÖ¡ÂÊPER=8.22222e-02,ÎóÂëÂÊBER=8.66667e-06
RaptorÂë£¬µ±Ç°¿ªÏú=1.70,µ±Ç°Ö¡ÊýÎª450, ÎóÖ¡ÂÊPER=0.00000e+00,ÎóÂëÂÊBER=0.00000e+00
LTÂë£¬µ±Ç°¿ªÏú=1.70,µ±Ç°Ö¡ÊýÎª500, ÎóÖ¡ÂÊPER=8.00000e-02,ÎóÂëÂÊBER=8.40000e-06
RaptorÂë£¬µ±Ç°¿ªÏú=1.70,µ±Ç°Ö¡ÊýÎª500, ÎóÖ¡ÂÊPER=0.00000e+00,ÎóÂëÂÊBER=0.00000e+00
LTÂë£¬µ±Ç°¿ªÏú=1.70,µ±Ç°Ö¡ÊýÎª550, ÎóÖ¡ÂÊPER=8.90909e-02,ÎóÂëÂÊBER=9.27273e-06
RaptorÂë£¬µ±Ç°¿ªÏú=1.70,µ±Ç°Ö¡ÊýÎª550, ÎóÖ¡ÂÊPER=0.00000e+00,ÎóÂëÂÊBER=0.00000e+00
LTÂë£¬µ±Ç°¿ªÏú=1.70,µ±Ç°Ö¡ÊýÎª600, ÎóÖ¡ÂÊPER=8.83333e-02,ÎóÂëÂÊBER=9.16667e-06
RaptorÂë£¬µ±Ç°¿ªÏú=1.70,µ±Ç°Ö¡ÊýÎª600, ÎóÖ¡ÂÊPER=0.00000e+00,ÎóÂëÂÊBER=0.00000e+00
LTÂë£¬µ±Ç°¿ªÏú=1.70,µ±Ç°Ö¡ÊýÎª650, ÎóÖ¡ÂÊPER=9.07692e-02,ÎóÂëÂÊBER=9.38462e-06
RaptorÂë£¬µ±Ç°¿ªÏú=1.70,µ±Ç°Ö¡ÊýÎª650, ÎóÖ¡ÂÊPER=0.00000e+00,ÎóÂëÂÊBER=0.00000e+00
LTÂë£¬µ±Ç°¿ªÏú=1.70,µ±Ç°Ö¡ÊýÎª700, ÎóÖ¡ÂÊPER=8.57143e-02,ÎóÂëÂÊBER=8.85714e-06
RaptorÂë£¬µ±Ç°¿ªÏú=1.70,µ±Ç°Ö¡ÊýÎª700, ÎóÖ¡ÂÊPER=0.00000e+00,ÎóÂëÂÊBER=0.00000e+00
LTÂë£¬µ±Ç°¿ªÏú=1.70,µ±Ç°Ö¡ÊýÎª750, ÎóÖ¡ÂÊPER=8.13333e-02,ÎóÂëÂÊBER=8.40000e-06
RaptorÂë£¬µ±Ç°¿ªÏú=1.70,µ±Ç°Ö¡ÊýÎª750, ÎóÖ¡ÂÊPER=0.00000e+00,ÎóÂëÂÊBER=0.00000e+00
LTÂë£¬µ±Ç°¿ªÏú=1.70,µ±Ç°Ö¡ÊýÎª800, ÎóÖ¡ÂÊPER=7.87500e-02,ÎóÂëÂÊBER=8.12500e-06
RaptorÂë£¬µ±Ç°¿ªÏú=1.70,µ±Ç°Ö¡ÊýÎª800, ÎóÖ¡ÂÊPER=0.00000e+00,ÎóÂëÂÊBER=0.00000e+00
LTÂë£¬µ±Ç°¿ªÏú=1.70,µ±Ç°Ö¡ÊýÎª850, ÎóÖ¡ÂÊPER=8.00000e-02,ÎóÂëÂÊBER=8.47059e-06
RaptorÂë£¬µ±Ç°¿ªÏú=1.70,µ±Ç°Ö¡ÊýÎª850, ÎóÖ¡ÂÊPER=0.00000e+00,ÎóÂëÂÊBER=0.00000e+00
LTÂë£¬µ±Ç°¿ªÏú=1.70,µ±Ç°Ö¡ÊýÎª900, ÎóÖ¡ÂÊPER=7.88889e-02,ÎóÂëÂÊBER=8.44444e-06
RaptorÂë£¬µ±Ç°¿ªÏú=1.70,µ±Ç°Ö¡ÊýÎª900, ÎóÖ¡ÂÊPER=0.00000e+00,ÎóÂëÂÊBER=0.00000e+00
LTÂë£¬µ±Ç°¿ªÏú=1.70,µ±Ç°Ö¡ÊýÎª950, ÎóÖ¡ÂÊPER=8.10526e-02,ÎóÂëÂÊBER=8.63158e-06
RaptorÂë£¬µ±Ç°¿ªÏú=1.70,µ±Ç°Ö¡ÊýÎª950, ÎóÖ¡ÂÊPER=0.00000e+00,ÎóÂëÂÊBER=0.00000e+00
LTÂë£¬µ±Ç°¿ªÏú=1.70,µ±Ç°Ö¡ÊýÎª1000, ÎóÖ¡ÂÊPER=8.60000e-02,ÎóÂëÂÊBER=9.10000e-06
RaptorÂë£¬µ±Ç°¿ªÏú=1.70,µ±Ç°Ö¡ÊýÎª1000, ÎóÖ¡ÂÊPER=0.00000e+00,ÎóÂëÂÊBER=0.00000e+00
LTÂë£¬µ±Ç°¿ªÏú=1.70,µ±Ç°Ö¡ÊýÎª1050, ÎóÖ¡ÂÊPER=8.57143e-02,ÎóÂëÂÊBER=9.04762e-06
RaptorÂë£¬µ±Ç°¿ªÏú=1.70,µ±Ç°Ö¡ÊýÎª1050, ÎóÖ¡ÂÊPER=0.00000e+00,ÎóÂëÂÊBER=0.00000e+00
LTÂë£¬µ±Ç°¿ªÏú=1.70,µ±Ç°Ö¡ÊýÎª1100, ÎóÖ¡ÂÊPER=8.45455e-02,ÎóÂëÂÊBER=8.90909e-06
RaptorÂë£¬µ±Ç°¿ªÏú=1.70,µ±Ç°Ö¡ÊýÎª1100, ÎóÖ¡ÂÊPER=0.00000e+00,ÎóÂëÂÊBER=0.00000e+00
LTÂë£¬µ±Ç°¿ªÏú=1.70,µ±Ç°Ö¡ÊýÎª1150, ÎóÖ¡ÂÊPER=8.34783e-02,ÎóÂëÂÊBER=8.78261e-06
RaptorÂë£¬µ±Ç°¿ªÏú=1.70,µ±Ç°Ö¡ÊýÎª1150, ÎóÖ¡ÂÊPER=0.00000e+00,ÎóÂëÂÊBER=0.00000e+00
LTÂë£¬µ±Ç°¿ªÏú=1.70,µ±Ç°Ö¡ÊýÎª1200, ÎóÖ¡ÂÊPER=8.41667e-02,ÎóÂëÂÊBER=8.83333e-06
RaptorÂë£¬µ±Ç°¿ªÏú=1.70,µ±Ç°Ö¡ÊýÎª1200, ÎóÖ¡ÂÊPER=0.00000e+00,ÎóÂëÂÊBER=0.00000e+00
LTÂë£¬µ±Ç°¿ªÏú=1.70,µ±Ç°Ö¡ÊýÎª1250, ÎóÖ¡ÂÊPER=8.48000e-02,ÎóÂëÂÊBER=9.12000e-06
RaptorÂë£¬µ±Ç°¿ªÏú=1.70,µ±Ç°Ö¡ÊýÎª1250, ÎóÖ¡ÂÊPER=0.00000e+00,ÎóÂëÂÊBER=0.00000e+00
LTÂë£¬µ±Ç°¿ªÏú=1.70,µ±Ç°Ö¡ÊýÎª1300, ÎóÖ¡ÂÊPER=8.38462e-02,ÎóÂëÂÊBER=9.07692e-06
RaptorÂë£¬µ±Ç°¿ªÏú=1.70,µ±Ç°Ö¡ÊýÎª1300, ÎóÖ¡ÂÊPER=0.00000e+00,ÎóÂëÂÊBER=0.00000e+00
LTÂë£¬µ±Ç°¿ªÏú=1.70,µ±Ç°Ö¡ÊýÎª1350, ÎóÖ¡ÂÊPER=8.14815e-02,ÎóÂëÂÊBER=8.81481e-06
RaptorÂë£¬µ±Ç°¿ªÏú=1.70,µ±Ç°Ö¡ÊýÎª1350, ÎóÖ¡ÂÊPER=0.00000e+00,ÎóÂëÂÊBER=0.00000e+00
LTÂë£¬µ±Ç°¿ªÏú=1.70,µ±Ç°Ö¡ÊýÎª1400, ÎóÖ¡ÂÊPER=8.50000e-02,ÎóÂëÂÊBER=9.28571e-06
RaptorÂë£¬µ±Ç°¿ªÏú=1.70,µ±Ç°Ö¡ÊýÎª1400, ÎóÖ¡ÂÊPER=0.00000e+00,ÎóÂëÂÊBER=0.00000e+00
LTÂë£¬µ±Ç°¿ªÏú=1.70,µ±Ç°Ö¡ÊýÎª1450, ÎóÖ¡ÂÊPER=8.48276e-02,ÎóÂëÂÊBER=9.24138e-06
RaptorÂë£¬µ±Ç°¿ªÏú=1.70,µ±Ç°Ö¡ÊýÎª1450, ÎóÖ¡ÂÊPER=0.00000e+00,ÎóÂëÂÊBER=0.00000e+00
LTÂë£¬µ±Ç°¿ªÏú=1.70,µ±Ç°Ö¡ÊýÎª1500, ÎóÖ¡ÂÊPER=8.40000e-02,ÎóÂëÂÊBER=9.13333e-06
RaptorÂë£¬µ±Ç°¿ªÏú=1.70,µ±Ç°Ö¡ÊýÎª1500, ÎóÖ¡ÂÊPER=0.00000e+00,ÎóÂëÂÊBER=0.00000e+00
LTÂë£¬µ±Ç°¿ªÏú=1.70,µ±Ç°Ö¡ÊýÎª1550, ÎóÖ¡ÂÊPER=8.12903e-02,ÎóÂëÂÊBER=8.83871e-06
RaptorÂë£¬µ±Ç°¿ªÏú=1.70,µ±Ç°Ö¡ÊýÎª1550, ÎóÖ¡ÂÊPER=0.00000e+00,ÎóÂëÂÊBER=0.00000e+00
LTÂë£¬µ±Ç°¿ªÏú=1.70,µ±Ç°Ö¡ÊýÎª1600, ÎóÖ¡ÂÊPER=8.18750e-02,ÎóÂëÂÊBER=8.93750e-06
RaptorÂë£¬µ±Ç°¿ªÏú=1.70,µ±Ç°Ö¡ÊýÎª1600, ÎóÖ¡ÂÊPER=0.00000e+00,ÎóÂëÂÊBER=0.00000e+00
LTÂë£¬µ±Ç°¿ªÏú=1.70,µ±Ç°Ö¡ÊýÎª1650, ÎóÖ¡ÂÊPER=8.30303e-02,ÎóÂëÂÊBER=9.03030e-06
RaptorÂë£¬µ±Ç°¿ªÏú=1.70,µ±Ç°Ö¡ÊýÎª1650, ÎóÖ¡ÂÊPER=0.00000e+00,ÎóÂëÂÊBER=0.00000e+00
LTÂë£¬µ±Ç°¿ªÏú=1.70,µ±Ç°Ö¡ÊýÎª1700, ÎóÖ¡ÂÊPER=8.52941e-02,ÎóÂëÂÊBER=9.35294e-06
RaptorÂë£¬µ±Ç°¿ªÏú=1.70,µ±Ç°Ö¡ÊýÎª1700, ÎóÖ¡ÂÊPER=0.00000e+00,ÎóÂëÂÊBER=0.00000e+00
LTÂë£¬µ±Ç°¿ªÏú=1.70,µ±Ç°Ö¡ÊýÎª1750, ÎóÖ¡ÂÊPER=8.51429e-02,ÎóÂëÂÊBER=9.31429e-06
RaptorÂë£¬µ±Ç°¿ªÏú=1.70,µ±Ç°Ö¡ÊýÎª1750, ÎóÖ¡ÂÊPER=0.00000e+00,ÎóÂëÂÊBER=0.00000e+00
LTÂë£¬µ±Ç°¿ªÏú=1.70,µ±Ç°Ö¡ÊýÎª1800, ÎóÖ¡ÂÊPER=8.50000e-02,ÎóÂëÂÊBER=9.33333e-06
RaptorÂë£¬µ±Ç°¿ªÏú=1.70,µ±Ç°Ö¡ÊýÎª1800, ÎóÖ¡ÂÊPER=0.00000e+00,ÎóÂëÂÊBER=0.00000e+00
LTÂë£¬µ±Ç°¿ªÏú=1.70,µ±Ç°Ö¡ÊýÎª1850, ÎóÖ¡ÂÊPER=8.59459e-02,ÎóÂëÂÊBER=9.40541e-06
RaptorÂë£¬µ±Ç°¿ªÏú=1.70,µ±Ç°Ö¡ÊýÎª1850, ÎóÖ¡ÂÊPER=0.00000e+00,ÎóÂëÂÊBER=0.00000e+00
LTÂë£¬µ±Ç°¿ªÏú=1.70,µ±Ç°Ö¡ÊýÎª1900, ÎóÖ¡ÂÊPER=8.52632e-02,ÎóÂëÂÊBER=9.31579e-06
RaptorÂë£¬µ±Ç°¿ªÏú=1.70,µ±Ç°Ö¡ÊýÎª1900, ÎóÖ¡ÂÊPER=0.00000e+00,ÎóÂëÂÊBER=0.00000e+00
LTÂë£¬µ±Ç°¿ªÏú=1.70,µ±Ç°Ö¡ÊýÎª1950, ÎóÖ¡ÂÊPER=8.66667e-02,ÎóÂëÂÊBER=9.48718e-06
RaptorÂë£¬µ±Ç°¿ªÏú=1.70,µ±Ç°Ö¡ÊýÎª1950, ÎóÖ¡ÂÊPER=0.00000e+00,ÎóÂëÂÊBER=0.00000e+00
LTÂë£¬µ±Ç°¿ªÏú=1.70,µ±Ç°Ö¡ÊýÎª2000, ÎóÖ¡ÂÊPER=8.55000e-02,ÎóÂëÂÊBER=9.40000e-06
RaptorÂë£¬µ±Ç°¿ªÏú=1.70,µ±Ç°Ö¡ÊýÎª2000, ÎóÖ¡ÂÊPER=0.00000e+00,ÎóÂëÂÊBER=0.00000e+00
µ±Ç°ÐÅµÀ±ê×¼²î=100.00,¿ªÏú=1.70,µ±Ç°Ö¡ÊýÎª2000, LTÂëÎóÂëÂÊBER_LT=9.40000e-06,RaptorÎóÂëÂÊBER=0.00000e+00
LTÂë£¬µ±Ç°¿ªÏú=1.80,µ±Ç°Ö¡ÊýÎª50, ÎóÖ¡ÂÊPER=4.00000e-02,ÎóÂëÂÊBER=4.00000e-06
RaptorÂë£¬µ±Ç°¿ªÏú=1.80,µ±Ç°Ö¡ÊýÎª50, ÎóÖ¡ÂÊPER=0.00000e+00,ÎóÂëÂÊBER=0.00000e+00
LTÂë£¬µ±Ç°¿ªÏú=1.80,µ±Ç°Ö¡ÊýÎª100, ÎóÖ¡ÂÊPER=8.00000e-02,ÎóÂëÂÊBER=8.00000e-06
RaptorÂë£¬µ±Ç°¿ªÏú=1.80,µ±Ç°Ö¡ÊýÎª100, ÎóÖ¡ÂÊPER=0.00000e+00,ÎóÂëÂÊBER=0.00000e+00
LTÂë£¬µ±Ç°¿ªÏú=1.80,µ±Ç°Ö¡ÊýÎª150, ÎóÖ¡ÂÊPER=5.33333e-02,ÎóÂëÂÊBER=5.33333e-06
RaptorÂë£¬µ±Ç°¿ªÏú=1.80,µ±Ç°Ö¡ÊýÎª150, ÎóÖ¡ÂÊPER=0.00000e+00,ÎóÂëÂÊBER=0.00000e+00
LTÂë£¬µ±Ç°¿ªÏú=1.80,µ±Ç°Ö¡ÊýÎª200, ÎóÖ¡ÂÊPER=5.00000e-02,ÎóÂëÂÊBER=5.00000e-06
RaptorÂë£¬µ±Ç°¿ªÏú=1.80,µ±Ç°Ö¡ÊýÎª200, ÎóÖ¡ÂÊPER=0.00000e+00,ÎóÂëÂÊBER=0.00000e+00
LTÂë£¬µ±Ç°¿ªÏú=1.80,µ±Ç°Ö¡ÊýÎª250, ÎóÖ¡ÂÊPER=4.40000e-02,ÎóÂëÂÊBER=4.40000e-06
RaptorÂë£¬µ±Ç°¿ªÏú=1.80,µ±Ç°Ö¡ÊýÎª250, ÎóÖ¡ÂÊPER=0.00000e+00,ÎóÂëÂÊBER=0.00000e+00
LTÂë£¬µ±Ç°¿ªÏú=1.80,µ±Ç°Ö¡ÊýÎª300, ÎóÖ¡ÂÊPER=4.33333e-02,ÎóÂëÂÊBER=4.33333e-06
RaptorÂë£¬µ±Ç°¿ªÏú=1.80,µ±Ç°Ö¡ÊýÎª300, ÎóÖ¡ÂÊPER=0.00000e+00,ÎóÂëÂÊBER=0.00000e+00
LTÂë£¬µ±Ç°¿ªÏú=1.80,µ±Ç°Ö¡ÊýÎª350, ÎóÖ¡ÂÊPER=4.28571e-02,ÎóÂëÂÊBER=4.28571e-06
RaptorÂë£¬µ±Ç°¿ªÏú=1.80,µ±Ç°Ö¡ÊýÎª350, ÎóÖ¡ÂÊPER=0.00000e+00,ÎóÂëÂÊBER=0.00000e+00
LTÂë£¬µ±Ç°¿ªÏú=1.80,µ±Ç°Ö¡ÊýÎª400, ÎóÖ¡ÂÊPER=4.00000e-02,ÎóÂëÂÊBER=4.00000e-06
RaptorÂë£¬µ±Ç°¿ªÏú=1.80,µ±Ç°Ö¡ÊýÎª400, ÎóÖ¡ÂÊPER=0.00000e+00,ÎóÂëÂÊBER=0.00000e+00
LTÂë£¬µ±Ç°¿ªÏú=1.80,µ±Ç°Ö¡ÊýÎª450, ÎóÖ¡ÂÊPER=4.22222e-02,ÎóÂëÂÊBER=4.22222e-06
RaptorÂë£¬µ±Ç°¿ªÏú=1.80,µ±Ç°Ö¡ÊýÎª450, ÎóÖ¡ÂÊPER=0.00000e+00,ÎóÂëÂÊBER=0.00000e+00
LTÂë£¬µ±Ç°¿ªÏú=1.80,µ±Ç°Ö¡ÊýÎª500, ÎóÖ¡ÂÊPER=4.20000e-02,ÎóÂëÂÊBER=4.20000e-06
RaptorÂë£¬µ±Ç°¿ªÏú=1.80,µ±Ç°Ö¡ÊýÎª500, ÎóÖ¡ÂÊPER=0.00000e+00,ÎóÂëÂÊBER=0.00000e+00
LTÂë£¬µ±Ç°¿ªÏú=1.80,µ±Ç°Ö¡ÊýÎª550, ÎóÖ¡ÂÊPER=4.72727e-02,ÎóÂëÂÊBER=4.72727e-06
RaptorÂë£¬µ±Ç°¿ªÏú=1.80,µ±Ç°Ö¡ÊýÎª550, ÎóÖ¡ÂÊPER=0.00000e+00,ÎóÂëÂÊBER=0.00000e+00
LTÂë£¬µ±Ç°¿ªÏú=1.80,µ±Ç°Ö¡ÊýÎª600, ÎóÖ¡ÂÊPER=4.50000e-02,ÎóÂëÂÊBER=4.50000e-06
RaptorÂë£¬µ±Ç°¿ªÏú=1.80,µ±Ç°Ö¡ÊýÎª600, ÎóÖ¡ÂÊPER=0.00000e+00,ÎóÂëÂÊBER=0.00000e+00
LTÂë£¬µ±Ç°¿ªÏú=1.80,µ±Ç°Ö¡ÊýÎª650, ÎóÖ¡ÂÊPER=4.76923e-02,ÎóÂëÂÊBER=4.76923e-06
RaptorÂë£¬µ±Ç°¿ªÏú=1.80,µ±Ç°Ö¡ÊýÎª650, ÎóÖ¡ÂÊPER=0.00000e+00,ÎóÂëÂÊBER=0.00000e+00
LTÂë£¬µ±Ç°¿ªÏú=1.80,µ±Ç°Ö¡ÊýÎª700, ÎóÖ¡ÂÊPER=4.57143e-02,ÎóÂëÂÊBER=4.57143e-06
RaptorÂë£¬µ±Ç°¿ªÏú=1.80,µ±Ç°Ö¡ÊýÎª700, ÎóÖ¡ÂÊPER=0.00000e+00,ÎóÂëÂÊBER=0.00000e+00
LTÂë£¬µ±Ç°¿ªÏú=1.80,µ±Ç°Ö¡ÊýÎª750, ÎóÖ¡ÂÊPER=4.66667e-02,ÎóÂëÂÊBER=4.80000e-06
RaptorÂë£¬µ±Ç°¿ªÏú=1.80,µ±Ç°Ö¡ÊýÎª750, ÎóÖ¡ÂÊPER=0.00000e+00,ÎóÂëÂÊBER=0.00000e+00
LTÂë£¬µ±Ç°¿ªÏú=1.80,µ±Ç°Ö¡ÊýÎª800, ÎóÖ¡ÂÊPER=4.75000e-02,ÎóÂëÂÊBER=4.87500e-06
RaptorÂë£¬µ±Ç°¿ªÏú=1.80,µ±Ç°Ö¡ÊýÎª800, ÎóÖ¡ÂÊPER=0.00000e+00,ÎóÂëÂÊBER=0.00000e+00
LTÂë£¬µ±Ç°¿ªÏú=1.80,µ±Ç°Ö¡ÊýÎª850, ÎóÖ¡ÂÊPER=4.58824e-02,ÎóÂëÂÊBER=4.70588e-06
RaptorÂë£¬µ±Ç°¿ªÏú=1.80,µ±Ç°Ö¡ÊýÎª850, ÎóÖ¡ÂÊPER=0.00000e+00,ÎóÂëÂÊBER=0.00000e+00
LTÂë£¬µ±Ç°¿ªÏú=1.80,µ±Ç°Ö¡ÊýÎª900, ÎóÖ¡ÂÊPER=4.66667e-02,ÎóÂëÂÊBER=4.77778e-06
RaptorÂë£¬µ±Ç°¿ªÏú=1.80,µ±Ç°Ö¡ÊýÎª900, ÎóÖ¡ÂÊPER=0.00000e+00,ÎóÂëÂÊBER=0.00000e+00
LTÂë£¬µ±Ç°¿ªÏú=1.80,µ±Ç°Ö¡ÊýÎª950, ÎóÖ¡ÂÊPER=4.63158e-02,ÎóÂëÂÊBER=4.73684e-06
RaptorÂë£¬µ±Ç°¿ªÏú=1.80,µ±Ç°Ö¡ÊýÎª950, ÎóÖ¡ÂÊPER=0.00000e+00,ÎóÂëÂÊBER=0.00000e+00
LTÂë£¬µ±Ç°¿ªÏú=1.80,µ±Ç°Ö¡ÊýÎª1000, ÎóÖ¡ÂÊPER=4.50000e-02,ÎóÂëÂÊBER=4.60000e-06
RaptorÂë£¬µ±Ç°¿ªÏú=1.80,µ±Ç°Ö¡ÊýÎª1000, ÎóÖ¡ÂÊPER=0.00000e+00,ÎóÂëÂÊBER=0.00000e+00
LTÂë£¬µ±Ç°¿ªÏú=1.80,µ±Ç°Ö¡ÊýÎª1050, ÎóÖ¡ÂÊPER=4.38095e-02,ÎóÂëÂÊBER=4.47619e-06
RaptorÂë£¬µ±Ç°¿ªÏú=1.80,µ±Ç°Ö¡ÊýÎª1050, ÎóÖ¡ÂÊPER=0.00000e+00,ÎóÂëÂÊBER=0.00000e+00
LTÂë£¬µ±Ç°¿ªÏú=1.80,µ±Ç°Ö¡ÊýÎª1100, ÎóÖ¡ÂÊPER=4.27273e-02,ÎóÂëÂÊBER=4.36364e-06
RaptorÂë£¬µ±Ç°¿ªÏú=1.80,µ±Ç°Ö¡ÊýÎª1100, ÎóÖ¡ÂÊPER=0.00000e+00,ÎóÂëÂÊBER=0.00000e+00
LTÂë£¬µ±Ç°¿ªÏú=1.80,µ±Ç°Ö¡ÊýÎª1150, ÎóÖ¡ÂÊPER=4.60870e-02,ÎóÂëÂÊBER=4.69565e-06
RaptorÂë£¬µ±Ç°¿ªÏú=1.80,µ±Ç°Ö¡ÊýÎª1150, ÎóÖ¡ÂÊPER=0.00000e+00,ÎóÂëÂÊBER=0.00000e+00
LTÂë£¬µ±Ç°¿ªÏú=1.80,µ±Ç°Ö¡ÊýÎª1200, ÎóÖ¡ÂÊPER=4.50000e-02,ÎóÂëÂÊBER=4.58333e-06
RaptorÂë£¬µ±Ç°¿ªÏú=1.80,µ±Ç°Ö¡ÊýÎª1200, ÎóÖ¡ÂÊPER=0.00000e+00,ÎóÂëÂÊBER=0.00000e+00
LTÂë£¬µ±Ç°¿ªÏú=1.80,µ±Ç°Ö¡ÊýÎª1250, ÎóÖ¡ÂÊPER=4.40000e-02,ÎóÂëÂÊBER=4.48000e-06
RaptorÂë£¬µ±Ç°¿ªÏú=1.80,µ±Ç°Ö¡ÊýÎª1250, ÎóÖ¡ÂÊPER=0.00000e+00,ÎóÂëÂÊBER=0.00000e+00
LTÂë£¬µ±Ç°¿ªÏú=1.80,µ±Ç°Ö¡ÊýÎª1300, ÎóÖ¡ÂÊPER=4.38462e-02,ÎóÂëÂÊBER=4.46154e-06
RaptorÂë£¬µ±Ç°¿ªÏú=1.80,µ±Ç°Ö¡ÊýÎª1300, ÎóÖ¡ÂÊPER=0.00000e+00,ÎóÂëÂÊBER=0.00000e+00
LTÂë£¬µ±Ç°¿ªÏú=1.80,µ±Ç°Ö¡ÊýÎª1350, ÎóÖ¡ÂÊPER=4.37037e-02,ÎóÂëÂÊBER=4.44444e-06
RaptorÂë£¬µ±Ç°¿ªÏú=1.80,µ±Ç°Ö¡ÊýÎª1350, ÎóÖ¡ÂÊPER=0.00000e+00,ÎóÂëÂÊBER=0.00000e+00
LTÂë£¬µ±Ç°¿ªÏú=1.80,µ±Ç°Ö¡ÊýÎª1400, ÎóÖ¡ÂÊPER=4.35714e-02,ÎóÂëÂÊBER=4.42857e-06
RaptorÂë£¬µ±Ç°¿ªÏú=1.80,µ±Ç°Ö¡ÊýÎª1400, ÎóÖ¡ÂÊPER=0.00000e+00,ÎóÂëÂÊBER=0.00000e+00
LTÂë£¬µ±Ç°¿ªÏú=1.80,µ±Ç°Ö¡ÊýÎª1450, ÎóÖ¡ÂÊPER=4.27586e-02,ÎóÂëÂÊBER=4.34483e-06
RaptorÂë£¬µ±Ç°¿ªÏú=1.80,µ±Ç°Ö¡ÊýÎª1450, ÎóÖ¡ÂÊPER=0.00000e+00,ÎóÂëÂÊBER=0.00000e+00
LTÂë£¬µ±Ç°¿ªÏú=1.80,µ±Ç°Ö¡ÊýÎª1500, ÎóÖ¡ÂÊPER=4.40000e-02,ÎóÂëÂÊBER=4.53333e-06
RaptorÂë£¬µ±Ç°¿ªÏú=1.80,µ±Ç°Ö¡ÊýÎª1500, ÎóÖ¡ÂÊPER=0.00000e+00,ÎóÂëÂÊBER=0.00000e+00
LTÂë£¬µ±Ç°¿ªÏú=1.80,µ±Ç°Ö¡ÊýÎª1550, ÎóÖ¡ÂÊPER=4.58065e-02,ÎóÂëÂÊBER=4.70968e-06
RaptorÂë£¬µ±Ç°¿ªÏú=1.80,µ±Ç°Ö¡ÊýÎª1550, ÎóÖ¡ÂÊPER=0.00000e+00,ÎóÂëÂÊBER=0.00000e+00
LTÂë£¬µ±Ç°¿ªÏú=1.80,µ±Ç°Ö¡ÊýÎª1600, ÎóÖ¡ÂÊPER=4.56250e-02,ÎóÂëÂÊBER=4.68750e-06
RaptorÂë£¬µ±Ç°¿ªÏú=1.80,µ±Ç°Ö¡ÊýÎª1600, ÎóÖ¡ÂÊPER=0.00000e+00,ÎóÂëÂÊBER=0.00000e+00
LTÂë£¬µ±Ç°¿ªÏú=1.80,µ±Ç°Ö¡ÊýÎª1650, ÎóÖ¡ÂÊPER=4.48485e-02,ÎóÂëÂÊBER=4.60606e-06
RaptorÂë£¬µ±Ç°¿ªÏú=1.80,µ±Ç°Ö¡ÊýÎª1650, ÎóÖ¡ÂÊPER=0.00000e+00,ÎóÂëÂÊBER=0.00000e+00
LTÂë£¬µ±Ç°¿ªÏú=1.80,µ±Ç°Ö¡ÊýÎª1700, ÎóÖ¡ÂÊPER=4.58824e-02,ÎóÂëÂÊBER=4.70588e-06
RaptorÂë£¬µ±Ç°¿ªÏú=1.80,µ±Ç°Ö¡ÊýÎª1700, ÎóÖ¡ÂÊPER=0.00000e+00,ÎóÂëÂÊBER=0.00000e+00
LTÂë£¬µ±Ç°¿ªÏú=1.80,µ±Ç°Ö¡ÊýÎª1750, ÎóÖ¡ÂÊPER=4.51429e-02,ÎóÂëÂÊBER=4.62857e-06
RaptorÂë£¬µ±Ç°¿ªÏú=1.80,µ±Ç°Ö¡ÊýÎª1750, ÎóÖ¡ÂÊPER=0.00000e+00,ÎóÂëÂÊBER=0.00000e+00
LTÂë£¬µ±Ç°¿ªÏú=1.80,µ±Ç°Ö¡ÊýÎª1800, ÎóÖ¡ÂÊPER=4.50000e-02,ÎóÂëÂÊBER=4.61111e-06
RaptorÂë£¬µ±Ç°¿ªÏú=1.80,µ±Ç°Ö¡ÊýÎª1800, ÎóÖ¡ÂÊPER=0.00000e+00,ÎóÂëÂÊBER=0.00000e+00
LTÂë£¬µ±Ç°¿ªÏú=1.80,µ±Ç°Ö¡ÊýÎª1850, ÎóÖ¡ÂÊPER=4.54054e-02,ÎóÂëÂÊBER=4.64865e-06
RaptorÂë£¬µ±Ç°¿ªÏú=1.80,µ±Ç°Ö¡ÊýÎª1850, ÎóÖ¡ÂÊPER=0.00000e+00,ÎóÂëÂÊBER=0.00000e+00
LTÂë£¬µ±Ç°¿ªÏú=1.80,µ±Ç°Ö¡ÊýÎª1900, ÎóÖ¡ÂÊPER=4.63158e-02,ÎóÂëÂÊBER=4.78947e-06
RaptorÂë£¬µ±Ç°¿ªÏú=1.80,µ±Ç°Ö¡ÊýÎª1900, ÎóÖ¡ÂÊPER=0.00000e+00,ÎóÂëÂÊBER=0.00000e+00
LTÂë£¬µ±Ç°¿ªÏú=1.80,µ±Ç°Ö¡ÊýÎª1950, ÎóÖ¡ÂÊPER=4.71795e-02,ÎóÂëÂÊBER=4.97436e-06
RaptorÂë£¬µ±Ç°¿ªÏú=1.80,µ±Ç°Ö¡ÊýÎª1950, ÎóÖ¡ÂÊPER=0.00000e+00,ÎóÂëÂÊBER=0.00000e+00
LTÂë£¬µ±Ç°¿ªÏú=1.80,µ±Ç°Ö¡ÊýÎª2000, ÎóÖ¡ÂÊPER=4.90000e-02,ÎóÂëÂÊBER=5.15000e-06
RaptorÂë£¬µ±Ç°¿ªÏú=1.80,µ±Ç°Ö¡ÊýÎª2000, ÎóÖ¡ÂÊPER=0.00000e+00,ÎóÂëÂÊBER=0.00000e+00
µ±Ç°ÐÅµÀ±ê×¼²î=100.00,¿ªÏú=1.80,µ±Ç°Ö¡ÊýÎª2000, LTÂëÎóÂëÂÊBER_LT=5.15000e-06,RaptorÎóÂëÂÊBER=0.00000e+00
LTÂë£¬µ±Ç°¿ªÏú=1.90,µ±Ç°Ö¡ÊýÎª50, ÎóÖ¡ÂÊPER=2.00000e-02,ÎóÂëÂÊBER=2.00000e-06
RaptorÂë£¬µ±Ç°¿ªÏú=1.90,µ±Ç°Ö¡ÊýÎª50, ÎóÖ¡ÂÊPER=0.00000e+00,ÎóÂëÂÊBER=0.00000e+00
LTÂë£¬µ±Ç°¿ªÏú=1.90,µ±Ç°Ö¡ÊýÎª100, ÎóÖ¡ÂÊPER=3.00000e-02,ÎóÂëÂÊBER=3.00000e-06
RaptorÂë£¬µ±Ç°¿ªÏú=1.90,µ±Ç°Ö¡ÊýÎª100, ÎóÖ¡ÂÊPER=0.00000e+00,ÎóÂëÂÊBER=0.00000e+00
LTÂë£¬µ±Ç°¿ªÏú=1.90,µ±Ç°Ö¡ÊýÎª150, ÎóÖ¡ÂÊPER=5.33333e-02,ÎóÂëÂÊBER=5.33333e-06
RaptorÂë£¬µ±Ç°¿ªÏú=1.90,µ±Ç°Ö¡ÊýÎª150, ÎóÖ¡ÂÊPER=0.00000e+00,ÎóÂëÂÊBER=0.00000e+00
LTÂë£¬µ±Ç°¿ªÏú=1.90,µ±Ç°Ö¡ÊýÎª200, ÎóÖ¡ÂÊPER=5.00000e-02,ÎóÂëÂÊBER=5.00000e-06
RaptorÂë£¬µ±Ç°¿ªÏú=1.90,µ±Ç°Ö¡ÊýÎª200, ÎóÖ¡ÂÊPER=0.00000e+00,ÎóÂëÂÊBER=0.00000e+00
LTÂë£¬µ±Ç°¿ªÏú=1.90,µ±Ç°Ö¡ÊýÎª250, ÎóÖ¡ÂÊPER=4.00000e-02,ÎóÂëÂÊBER=4.00000e-06
RaptorÂë£¬µ±Ç°¿ªÏú=1.90,µ±Ç°Ö¡ÊýÎª250, ÎóÖ¡ÂÊPER=0.00000e+00,ÎóÂëÂÊBER=0.00000e+00
LTÂë£¬µ±Ç°¿ªÏú=1.90,µ±Ç°Ö¡ÊýÎª300, ÎóÖ¡ÂÊPER=4.33333e-02,ÎóÂëÂÊBER=4.33333e-06
RaptorÂë£¬µ±Ç°¿ªÏú=1.90,µ±Ç°Ö¡ÊýÎª300, ÎóÖ¡ÂÊPER=0.00000e+00,ÎóÂëÂÊBER=0.00000e+00
LTÂë£¬µ±Ç°¿ªÏú=1.90,µ±Ç°Ö¡ÊýÎª350, ÎóÖ¡ÂÊPER=3.71429e-02,ÎóÂëÂÊBER=3.71429e-06
RaptorÂë£¬µ±Ç°¿ªÏú=1.90,µ±Ç°Ö¡ÊýÎª350, ÎóÖ¡ÂÊPER=0.00000e+00,ÎóÂëÂÊBER=0.00000e+00
LTÂë£¬µ±Ç°¿ªÏú=1.90,µ±Ç°Ö¡ÊýÎª400, ÎóÖ¡ÂÊPER=3.25000e-02,ÎóÂëÂÊBER=3.25000e-06
RaptorÂë£¬µ±Ç°¿ªÏú=1.90,µ±Ç°Ö¡ÊýÎª400, ÎóÖ¡ÂÊPER=0.00000e+00,ÎóÂëÂÊBER=0.00000e+00
LTÂë£¬µ±Ç°¿ªÏú=1.90,µ±Ç°Ö¡ÊýÎª450, ÎóÖ¡ÂÊPER=4.00000e-02,ÎóÂëÂÊBER=4.00000e-06
RaptorÂë£¬µ±Ç°¿ªÏú=1.90,µ±Ç°Ö¡ÊýÎª450, ÎóÖ¡ÂÊPER=0.00000e+00,ÎóÂëÂÊBER=0.00000e+00
LTÂë£¬µ±Ç°¿ªÏú=1.90,µ±Ç°Ö¡ÊýÎª500, ÎóÖ¡ÂÊPER=3.60000e-02,ÎóÂëÂÊBER=3.60000e-06
RaptorÂë£¬µ±Ç°¿ªÏú=1.90,µ±Ç°Ö¡ÊýÎª500, ÎóÖ¡ÂÊPER=0.00000e+00,ÎóÂëÂÊBER=0.00000e+00
LTÂë£¬µ±Ç°¿ªÏú=1.90,µ±Ç°Ö¡ÊýÎª550, ÎóÖ¡ÂÊPER=3.45455e-02,ÎóÂëÂÊBER=3.45455e-06
RaptorÂë£¬µ±Ç°¿ªÏú=1.90,µ±Ç°Ö¡ÊýÎª550, ÎóÖ¡ÂÊPER=0.00000e+00,ÎóÂëÂÊBER=0.00000e+00
LTÂë£¬µ±Ç°¿ªÏú=1.90,µ±Ç°Ö¡ÊýÎª600, ÎóÖ¡ÂÊPER=3.66667e-02,ÎóÂëÂÊBER=3.66667e-06
RaptorÂë£¬µ±Ç°¿ªÏú=1.90,µ±Ç°Ö¡ÊýÎª600, ÎóÖ¡ÂÊPER=0.00000e+00,ÎóÂëÂÊBER=0.00000e+00
LTÂë£¬µ±Ç°¿ªÏú=1.90,µ±Ç°Ö¡ÊýÎª650, ÎóÖ¡ÂÊPER=3.38462e-02,ÎóÂëÂÊBER=3.38462e-06
RaptorÂë£¬µ±Ç°¿ªÏú=1.90,µ±Ç°Ö¡ÊýÎª650, ÎóÖ¡ÂÊPER=0.00000e+00,ÎóÂëÂÊBER=0.00000e+00
LTÂë£¬µ±Ç°¿ªÏú=1.90,µ±Ç°Ö¡ÊýÎª700, ÎóÖ¡ÂÊPER=3.14286e-02,ÎóÂëÂÊBER=3.14286e-06
RaptorÂë£¬µ±Ç°¿ªÏú=1.90,µ±Ç°Ö¡ÊýÎª700, ÎóÖ¡ÂÊPER=0.00000e+00,ÎóÂëÂÊBER=0.00000e+00
LTÂë£¬µ±Ç°¿ªÏú=1.90,µ±Ç°Ö¡ÊýÎª750, ÎóÖ¡ÂÊPER=2.93333e-02,ÎóÂëÂÊBER=2.93333e-06
RaptorÂë£¬µ±Ç°¿ªÏú=1.90,µ±Ç°Ö¡ÊýÎª750, ÎóÖ¡ÂÊPER=0.00000e+00,ÎóÂëÂÊBER=0.00000e+00
LTÂë£¬µ±Ç°¿ªÏú=1.90,µ±Ç°Ö¡ÊýÎª800, ÎóÖ¡ÂÊPER=3.00000e-02,ÎóÂëÂÊBER=3.00000e-06
RaptorÂë£¬µ±Ç°¿ªÏú=1.90,µ±Ç°Ö¡ÊýÎª800, ÎóÖ¡ÂÊPER=0.00000e+00,ÎóÂëÂÊBER=0.00000e+00
LTÂë£¬µ±Ç°¿ªÏú=1.90,µ±Ç°Ö¡ÊýÎª850, ÎóÖ¡ÂÊPER=3.05882e-02,ÎóÂëÂÊBER=3.05882e-06
RaptorÂë£¬µ±Ç°¿ªÏú=1.90,µ±Ç°Ö¡ÊýÎª850, ÎóÖ¡ÂÊPER=0.00000e+00,ÎóÂëÂÊBER=0.00000e+00
LTÂë£¬µ±Ç°¿ªÏú=1.90,µ±Ç°Ö¡ÊýÎª900, ÎóÖ¡ÂÊPER=3.11111e-02,ÎóÂëÂÊBER=3.11111e-06
RaptorÂë£¬µ±Ç°¿ªÏú=1.90,µ±Ç°Ö¡ÊýÎª900, ÎóÖ¡ÂÊPER=0.00000e+00,ÎóÂëÂÊBER=0.00000e+00
LTÂë£¬µ±Ç°¿ªÏú=1.90,µ±Ç°Ö¡ÊýÎª950, ÎóÖ¡ÂÊPER=3.26316e-02,ÎóÂëÂÊBER=3.26316e-06
RaptorÂë£¬µ±Ç°¿ªÏú=1.90,µ±Ç°Ö¡ÊýÎª950, ÎóÖ¡ÂÊPER=0.00000e+00,ÎóÂëÂÊBER=0.00000e+00
LTÂë£¬µ±Ç°¿ªÏú=1.90,µ±Ç°Ö¡ÊýÎª1000, ÎóÖ¡ÂÊPER=3.40000e-02,ÎóÂëÂÊBER=3.40000e-06
RaptorÂë£¬µ±Ç°¿ªÏú=1.90,µ±Ç°Ö¡ÊýÎª1000, ÎóÖ¡ÂÊPER=0.00000e+00,ÎóÂëÂÊBER=0.00000e+00
LTÂë£¬µ±Ç°¿ªÏú=1.90,µ±Ç°Ö¡ÊýÎª1050, ÎóÖ¡ÂÊPER=3.42857e-02,ÎóÂëÂÊBER=3.42857e-06
RaptorÂë£¬µ±Ç°¿ªÏú=1.90,µ±Ç°Ö¡ÊýÎª1050, ÎóÖ¡ÂÊPER=0.00000e+00,ÎóÂëÂÊBER=0.00000e+00
LTÂë£¬µ±Ç°¿ªÏú=1.90,µ±Ç°Ö¡ÊýÎª1100, ÎóÖ¡ÂÊPER=3.27273e-02,ÎóÂëÂÊBER=3.27273e-06
RaptorÂë£¬µ±Ç°¿ªÏú=1.90,µ±Ç°Ö¡ÊýÎª1100, ÎóÖ¡ÂÊPER=0.00000e+00,ÎóÂëÂÊBER=0.00000e+00
LTÂë£¬µ±Ç°¿ªÏú=1.90,µ±Ç°Ö¡ÊýÎª1150, ÎóÖ¡ÂÊPER=3.30435e-02,ÎóÂëÂÊBER=3.30435e-06
RaptorÂë£¬µ±Ç°¿ªÏú=1.90,µ±Ç°Ö¡ÊýÎª1150, ÎóÖ¡ÂÊPER=0.00000e+00,ÎóÂëÂÊBER=0.00000e+00
LTÂë£¬µ±Ç°¿ªÏú=1.90,µ±Ç°Ö¡ÊýÎª1200, ÎóÖ¡ÂÊPER=3.33333e-02,ÎóÂëÂÊBER=3.33333e-06
RaptorÂë£¬µ±Ç°¿ªÏú=1.90,µ±Ç°Ö¡ÊýÎª1200, ÎóÖ¡ÂÊPER=0.00000e+00,ÎóÂëÂÊBER=0.00000e+00
LTÂë£¬µ±Ç°¿ªÏú=1.90,µ±Ç°Ö¡ÊýÎª1250, ÎóÖ¡ÂÊPER=3.28000e-02,ÎóÂëÂÊBER=3.28000e-06
RaptorÂë£¬µ±Ç°¿ªÏú=1.90,µ±Ç°Ö¡ÊýÎª1250, ÎóÖ¡ÂÊPER=0.00000e+00,ÎóÂëÂÊBER=0.00000e+00
LTÂë£¬µ±Ç°¿ªÏú=1.90,µ±Ç°Ö¡ÊýÎª1300, ÎóÖ¡ÂÊPER=3.30769e-02,ÎóÂëÂÊBER=3.30769e-06
RaptorÂë£¬µ±Ç°¿ªÏú=1.90,µ±Ç°Ö¡ÊýÎª1300, ÎóÖ¡ÂÊPER=0.00000e+00,ÎóÂëÂÊBER=0.00000e+00
LTÂë£¬µ±Ç°¿ªÏú=1.90,µ±Ç°Ö¡ÊýÎª1350, ÎóÖ¡ÂÊPER=3.25926e-02,ÎóÂëÂÊBER=3.25926e-06
RaptorÂë£¬µ±Ç°¿ªÏú=1.90,µ±Ç°Ö¡ÊýÎª1350, ÎóÖ¡ÂÊPER=0.00000e+00,ÎóÂëÂÊBER=0.00000e+00
LTÂë£¬µ±Ç°¿ªÏú=1.90,µ±Ç°Ö¡ÊýÎª1400, ÎóÖ¡ÂÊPER=3.21429e-02,ÎóÂëÂÊBER=3.21429e-06
RaptorÂë£¬µ±Ç°¿ªÏú=1.90,µ±Ç°Ö¡ÊýÎª1400, ÎóÖ¡ÂÊPER=0.00000e+00,ÎóÂëÂÊBER=0.00000e+00
LTÂë£¬µ±Ç°¿ªÏú=1.90,µ±Ç°Ö¡ÊýÎª1450, ÎóÖ¡ÂÊPER=3.10345e-02,ÎóÂëÂÊBER=3.10345e-06
RaptorÂë£¬µ±Ç°¿ªÏú=1.90,µ±Ç°Ö¡ÊýÎª1450, ÎóÖ¡ÂÊPER=0.00000e+00,ÎóÂëÂÊBER=0.00000e+00
LTÂë£¬µ±Ç°¿ªÏú=1.90,µ±Ç°Ö¡ÊýÎª1500, ÎóÖ¡ÂÊPER=3.06667e-02,ÎóÂëÂÊBER=3.06667e-06
RaptorÂë£¬µ±Ç°¿ªÏú=1.90,µ±Ç°Ö¡ÊýÎª1500, ÎóÖ¡ÂÊPER=0.00000e+00,ÎóÂëÂÊBER=0.00000e+00
LTÂë£¬µ±Ç°¿ªÏú=1.90,µ±Ç°Ö¡ÊýÎª1550, ÎóÖ¡ÂÊPER=3.16129e-02,ÎóÂëÂÊBER=3.16129e-06
RaptorÂë£¬µ±Ç°¿ªÏú=1.90,µ±Ç°Ö¡ÊýÎª1550, ÎóÖ¡ÂÊPER=0.00000e+00,ÎóÂëÂÊBER=0.00000e+00
LTÂë£¬µ±Ç°¿ªÏú=1.90,µ±Ç°Ö¡ÊýÎª1600, ÎóÖ¡ÂÊPER=3.06250e-02,ÎóÂëÂÊBER=3.06250e-06
RaptorÂë£¬µ±Ç°¿ªÏú=1.90,µ±Ç°Ö¡ÊýÎª1600, ÎóÖ¡ÂÊPER=0.00000e+00,ÎóÂëÂÊBER=0.00000e+00
LTÂë£¬µ±Ç°¿ªÏú=1.90,µ±Ç°Ö¡ÊýÎª1650, ÎóÖ¡ÂÊPER=3.15152e-02,ÎóÂëÂÊBER=3.15152e-06
RaptorÂë£¬µ±Ç°¿ªÏú=1.90,µ±Ç°Ö¡ÊýÎª1650, ÎóÖ¡ÂÊPER=0.00000e+00,ÎóÂëÂÊBER=0.00000e+00
LTÂë£¬µ±Ç°¿ªÏú=1.90,µ±Ç°Ö¡ÊýÎª1700, ÎóÖ¡ÂÊPER=3.23529e-02,ÎóÂëÂÊBER=3.23529e-06
RaptorÂë£¬µ±Ç°¿ªÏú=1.90,µ±Ç°Ö¡ÊýÎª1700, ÎóÖ¡ÂÊPER=0.00000e+00,ÎóÂëÂÊBER=0.00000e+00
LTÂë£¬µ±Ç°¿ªÏú=1.90,µ±Ç°Ö¡ÊýÎª1750, ÎóÖ¡ÂÊPER=3.14286e-02,ÎóÂëÂÊBER=3.14286e-06
RaptorÂë£¬µ±Ç°¿ªÏú=1.90,µ±Ç°Ö¡ÊýÎª1750, ÎóÖ¡ÂÊPER=0.00000e+00,ÎóÂëÂÊBER=0.00000e+00
LTÂë£¬µ±Ç°¿ªÏú=1.90,µ±Ç°Ö¡ÊýÎª1800, ÎóÖ¡ÂÊPER=3.16667e-02,ÎóÂëÂÊBER=3.16667e-06
RaptorÂë£¬µ±Ç°¿ªÏú=1.90,µ±Ç°Ö¡ÊýÎª1800, ÎóÖ¡ÂÊPER=0.00000e+00,ÎóÂëÂÊBER=0.00000e+00
LTÂë£¬µ±Ç°¿ªÏú=1.90,µ±Ç°Ö¡ÊýÎª1850, ÎóÖ¡ÂÊPER=3.13514e-02,ÎóÂëÂÊBER=3.13514e-06
RaptorÂë£¬µ±Ç°¿ªÏú=1.90,µ±Ç°Ö¡ÊýÎª1850, ÎóÖ¡ÂÊPER=0.00000e+00,ÎóÂëÂÊBER=0.00000e+00
LTÂë£¬µ±Ç°¿ªÏú=1.90,µ±Ç°Ö¡ÊýÎª1900, ÎóÖ¡ÂÊPER=3.15789e-02,ÎóÂëÂÊBER=3.21053e-06
RaptorÂë£¬µ±Ç°¿ªÏú=1.90,µ±Ç°Ö¡ÊýÎª1900, ÎóÖ¡ÂÊPER=0.00000e+00,ÎóÂëÂÊBER=0.00000e+00
LTÂë£¬µ±Ç°¿ªÏú=1.90,µ±Ç°Ö¡ÊýÎª1950, ÎóÖ¡ÂÊPER=3.23077e-02,ÎóÂëÂÊBER=3.28205e-06
RaptorÂë£¬µ±Ç°¿ªÏú=1.90,µ±Ç°Ö¡ÊýÎª1950, ÎóÖ¡ÂÊPER=0.00000e+00,ÎóÂëÂÊBER=0.00000e+00
LTÂë£¬µ±Ç°¿ªÏú=1.90,µ±Ç°Ö¡ÊýÎª2000, ÎóÖ¡ÂÊPER=3.15000e-02,ÎóÂëÂÊBER=3.20000e-06
RaptorÂë£¬µ±Ç°¿ªÏú=1.90,µ±Ç°Ö¡ÊýÎª2000, ÎóÖ¡ÂÊPER=0.00000e+00,ÎóÂëÂÊBER=0.00000e+00
µ±Ç°ÐÅµÀ±ê×¼²î=100.00,¿ªÏú=1.90,µ±Ç°Ö¡ÊýÎª2000, LTÂëÎóÂëÂÊBER_LT=3.20000e-06,RaptorÎóÂëÂÊBER=0.00000e+00
LTÂë£¬µ±Ç°¿ªÏú=2.00,µ±Ç°Ö¡ÊýÎª50, ÎóÖ¡ÂÊPER=2.00000e-02,ÎóÂëÂÊBER=2.00000e-06
RaptorÂë£¬µ±Ç°¿ªÏú=2.00,µ±Ç°Ö¡ÊýÎª50, ÎóÖ¡ÂÊPER=0.00000e+00,ÎóÂëÂÊBER=0.00000e+00
LTÂë£¬µ±Ç°¿ªÏú=2.00,µ±Ç°Ö¡ÊýÎª100, ÎóÖ¡ÂÊPER=2.00000e-02,ÎóÂëÂÊBER=2.00000e-06
RaptorÂë£¬µ±Ç°¿ªÏú=2.00,µ±Ç°Ö¡ÊýÎª100, ÎóÖ¡ÂÊPER=0.00000e+00,ÎóÂëÂÊBER=0.00000e+00
LTÂë£¬µ±Ç°¿ªÏú=2.00,µ±Ç°Ö¡ÊýÎª150, ÎóÖ¡ÂÊPER=2.00000e-02,ÎóÂëÂÊBER=2.00000e-06
RaptorÂë£¬µ±Ç°¿ªÏú=2.00,µ±Ç°Ö¡ÊýÎª150, ÎóÖ¡ÂÊPER=0.00000e+00,ÎóÂëÂÊBER=0.00000e+00
LTÂë£¬µ±Ç°¿ªÏú=2.00,µ±Ç°Ö¡ÊýÎª200, ÎóÖ¡ÂÊPER=3.00000e-02,ÎóÂëÂÊBER=3.00000e-06
RaptorÂë£¬µ±Ç°¿ªÏú=2.00,µ±Ç°Ö¡ÊýÎª200, ÎóÖ¡ÂÊPER=0.00000e+00,ÎóÂëÂÊBER=0.00000e+00
LTÂë£¬µ±Ç°¿ªÏú=2.00,µ±Ç°Ö¡ÊýÎª250, ÎóÖ¡ÂÊPER=2.40000e-02,ÎóÂëÂÊBER=2.40000e-06
RaptorÂë£¬µ±Ç°¿ªÏú=2.00,µ±Ç°Ö¡ÊýÎª250, ÎóÖ¡ÂÊPER=0.00000e+00,ÎóÂëÂÊBER=0.00000e+00
LTÂë£¬µ±Ç°¿ªÏú=2.00,µ±Ç°Ö¡ÊýÎª300, ÎóÖ¡ÂÊPER=2.00000e-02,ÎóÂëÂÊBER=2.00000e-06
RaptorÂë£¬µ±Ç°¿ªÏú=2.00,µ±Ç°Ö¡ÊýÎª300, ÎóÖ¡ÂÊPER=0.00000e+00,ÎóÂëÂÊBER=0.00000e+00
LTÂë£¬µ±Ç°¿ªÏú=2.00,µ±Ç°Ö¡ÊýÎª350, ÎóÖ¡ÂÊPER=2.28571e-02,ÎóÂëÂÊBER=2.28571e-06
RaptorÂë£¬µ±Ç°¿ªÏú=2.00,µ±Ç°Ö¡ÊýÎª350, ÎóÖ¡ÂÊPER=0.00000e+00,ÎóÂëÂÊBER=0.00000e+00
LTÂë£¬µ±Ç°¿ªÏú=2.00,µ±Ç°Ö¡ÊýÎª400, ÎóÖ¡ÂÊPER=2.25000e-02,ÎóÂëÂÊBER=2.25000e-06
RaptorÂë£¬µ±Ç°¿ªÏú=2.00,µ±Ç°Ö¡ÊýÎª400, ÎóÖ¡ÂÊPER=0.00000e+00,ÎóÂëÂÊBER=0.00000e+00
LTÂë£¬µ±Ç°¿ªÏú=2.00,µ±Ç°Ö¡ÊýÎª450, ÎóÖ¡ÂÊPER=2.00000e-02,ÎóÂëÂÊBER=2.00000e-06
RaptorÂë£¬µ±Ç°¿ªÏú=2.00,µ±Ç°Ö¡ÊýÎª450, ÎóÖ¡ÂÊPER=0.00000e+00,ÎóÂëÂÊBER=0.00000e+00
LTÂë£¬µ±Ç°¿ªÏú=2.00,µ±Ç°Ö¡ÊýÎª500, ÎóÖ¡ÂÊPER=2.20000e-02,ÎóÂëÂÊBER=2.20000e-06
RaptorÂë£¬µ±Ç°¿ªÏú=2.00,µ±Ç°Ö¡ÊýÎª500, ÎóÖ¡ÂÊPER=0.00000e+00,ÎóÂëÂÊBER=0.00000e+00
LTÂë£¬µ±Ç°¿ªÏú=2.00,µ±Ç°Ö¡ÊýÎª550, ÎóÖ¡ÂÊPER=2.18182e-02,ÎóÂëÂÊBER=2.18182e-06
RaptorÂë£¬µ±Ç°¿ªÏú=2.00,µ±Ç°Ö¡ÊýÎª550, ÎóÖ¡ÂÊPER=0.00000e+00,ÎóÂëÂÊBER=0.00000e+00
LTÂë£¬µ±Ç°¿ªÏú=2.00,µ±Ç°Ö¡ÊýÎª600, ÎóÖ¡ÂÊPER=2.00000e-02,ÎóÂëÂÊBER=2.00000e-06
RaptorÂë£¬µ±Ç°¿ªÏú=2.00,µ±Ç°Ö¡ÊýÎª600, ÎóÖ¡ÂÊPER=0.00000e+00,ÎóÂëÂÊBER=0.00000e+00
LTÂë£¬µ±Ç°¿ªÏú=2.00,µ±Ç°Ö¡ÊýÎª650, ÎóÖ¡ÂÊPER=1.84615e-02,ÎóÂëÂÊBER=1.84615e-06
RaptorÂë£¬µ±Ç°¿ªÏú=2.00,µ±Ç°Ö¡ÊýÎª650, ÎóÖ¡ÂÊPER=0.00000e+00,ÎóÂëÂÊBER=0.00000e+00
LTÂë£¬µ±Ç°¿ªÏú=2.00,µ±Ç°Ö¡ÊýÎª700, ÎóÖ¡ÂÊPER=1.71429e-02,ÎóÂëÂÊBER=1.71429e-06
RaptorÂë£¬µ±Ç°¿ªÏú=2.00,µ±Ç°Ö¡ÊýÎª700, ÎóÖ¡ÂÊPER=0.00000e+00,ÎóÂëÂÊBER=0.00000e+00
LTÂë£¬µ±Ç°¿ªÏú=2.00,µ±Ç°Ö¡ÊýÎª750, ÎóÖ¡ÂÊPER=1.60000e-02,ÎóÂëÂÊBER=1.60000e-06
RaptorÂë£¬µ±Ç°¿ªÏú=2.00,µ±Ç°Ö¡ÊýÎª750, ÎóÖ¡ÂÊPER=0.00000e+00,ÎóÂëÂÊBER=0.00000e+00
LTÂë£¬µ±Ç°¿ªÏú=2.00,µ±Ç°Ö¡ÊýÎª800, ÎóÖ¡ÂÊPER=1.75000e-02,ÎóÂëÂÊBER=1.75000e-06
RaptorÂë£¬µ±Ç°¿ªÏú=2.00,µ±Ç°Ö¡ÊýÎª800, ÎóÖ¡ÂÊPER=0.00000e+00,ÎóÂëÂÊBER=0.00000e+00
LTÂë£¬µ±Ç°¿ªÏú=2.00,µ±Ç°Ö¡ÊýÎª850, ÎóÖ¡ÂÊPER=1.76471e-02,ÎóÂëÂÊBER=1.76471e-06
RaptorÂë£¬µ±Ç°¿ªÏú=2.00,µ±Ç°Ö¡ÊýÎª850, ÎóÖ¡ÂÊPER=0.00000e+00,ÎóÂëÂÊBER=0.00000e+00
LTÂë£¬µ±Ç°¿ªÏú=2.00,µ±Ç°Ö¡ÊýÎª900, ÎóÖ¡ÂÊPER=1.88889e-02,ÎóÂëÂÊBER=1.88889e-06
RaptorÂë£¬µ±Ç°¿ªÏú=2.00,µ±Ç°Ö¡ÊýÎª900, ÎóÖ¡ÂÊPER=0.00000e+00,ÎóÂëÂÊBER=0.00000e+00
LTÂë£¬µ±Ç°¿ªÏú=2.00,µ±Ç°Ö¡ÊýÎª950, ÎóÖ¡ÂÊPER=1.89474e-02,ÎóÂëÂÊBER=1.89474e-06
RaptorÂë£¬µ±Ç°¿ªÏú=2.00,µ±Ç°Ö¡ÊýÎª950, ÎóÖ¡ÂÊPER=0.00000e+00,ÎóÂëÂÊBER=0.00000e+00
LTÂë£¬µ±Ç°¿ªÏú=2.00,µ±Ç°Ö¡ÊýÎª1000, ÎóÖ¡ÂÊPER=1.80000e-02,ÎóÂëÂÊBER=1.80000e-06
RaptorÂë£¬µ±Ç°¿ªÏú=2.00,µ±Ç°Ö¡ÊýÎª1000, ÎóÖ¡ÂÊPER=0.00000e+00,ÎóÂëÂÊBER=0.00000e+00
LTÂë£¬µ±Ç°¿ªÏú=2.00,µ±Ç°Ö¡ÊýÎª1050, ÎóÖ¡ÂÊPER=1.90476e-02,ÎóÂëÂÊBER=1.90476e-06
RaptorÂë£¬µ±Ç°¿ªÏú=2.00,µ±Ç°Ö¡ÊýÎª1050, ÎóÖ¡ÂÊPER=0.00000e+00,ÎóÂëÂÊBER=0.00000e+00
LTÂë£¬µ±Ç°¿ªÏú=2.00,µ±Ç°Ö¡ÊýÎª1100, ÎóÖ¡ÂÊPER=2.00000e-02,ÎóÂëÂÊBER=2.00000e-06
RaptorÂë£¬µ±Ç°¿ªÏú=2.00,µ±Ç°Ö¡ÊýÎª1100, ÎóÖ¡ÂÊPER=0.00000e+00,ÎóÂëÂÊBER=0.00000e+00
LTÂë£¬µ±Ç°¿ªÏú=2.00,µ±Ç°Ö¡ÊýÎª1150, ÎóÖ¡ÂÊPER=1.91304e-02,ÎóÂëÂÊBER=1.91304e-06
RaptorÂë£¬µ±Ç°¿ªÏú=2.00,µ±Ç°Ö¡ÊýÎª1150, ÎóÖ¡ÂÊPER=0.00000e+00,ÎóÂëÂÊBER=0.00000e+00
LTÂë£¬µ±Ç°¿ªÏú=2.00,µ±Ç°Ö¡ÊýÎª1200, ÎóÖ¡ÂÊPER=1.91667e-02,ÎóÂëÂÊBER=1.91667e-06
RaptorÂë£¬µ±Ç°¿ªÏú=2.00,µ±Ç°Ö¡ÊýÎª1200, ÎóÖ¡ÂÊPER=0.00000e+00,ÎóÂëÂÊBER=0.00000e+00
LTÂë£¬µ±Ç°¿ªÏú=2.00,µ±Ç°Ö¡ÊýÎª1250, ÎóÖ¡ÂÊPER=2.00000e-02,ÎóÂëÂÊBER=2.00000e-06
RaptorÂë£¬µ±Ç°¿ªÏú=2.00,µ±Ç°Ö¡ÊýÎª1250, ÎóÖ¡ÂÊPER=0.00000e+00,ÎóÂëÂÊBER=0.00000e+00
LTÂë£¬µ±Ç°¿ªÏú=2.00,µ±Ç°Ö¡ÊýÎª1300, ÎóÖ¡ÂÊPER=2.15385e-02,ÎóÂëÂÊBER=2.30769e-06
RaptorÂë£¬µ±Ç°¿ªÏú=2.00,µ±Ç°Ö¡ÊýÎª1300, ÎóÖ¡ÂÊPER=0.00000e+00,ÎóÂëÂÊBER=0.00000e+00
LTÂë£¬µ±Ç°¿ªÏú=2.00,µ±Ç°Ö¡ÊýÎª1350, ÎóÖ¡ÂÊPER=2.07407e-02,ÎóÂëÂÊBER=2.22222e-06
RaptorÂë£¬µ±Ç°¿ªÏú=2.00,µ±Ç°Ö¡ÊýÎª1350, ÎóÖ¡ÂÊPER=0.00000e+00,ÎóÂëÂÊBER=0.00000e+00
LTÂë£¬µ±Ç°¿ªÏú=2.00,µ±Ç°Ö¡ÊýÎª1400, ÎóÖ¡ÂÊPER=2.07143e-02,ÎóÂëÂÊBER=2.28571e-06
RaptorÂë£¬µ±Ç°¿ªÏú=2.00,µ±Ç°Ö¡ÊýÎª1400, ÎóÖ¡ÂÊPER=0.00000e+00,ÎóÂëÂÊBER=0.00000e+00
LTÂë£¬µ±Ç°¿ªÏú=2.00,µ±Ç°Ö¡ÊýÎª1450, ÎóÖ¡ÂÊPER=2.13793e-02,ÎóÂëÂÊBER=2.34483e-06
RaptorÂë£¬µ±Ç°¿ªÏú=2.00,µ±Ç°Ö¡ÊýÎª1450, ÎóÖ¡ÂÊPER=0.00000e+00,ÎóÂëÂÊBER=0.00000e+00
LTÂë£¬µ±Ç°¿ªÏú=2.00,µ±Ç°Ö¡ÊýÎª1500, ÎóÖ¡ÂÊPER=2.13333e-02,ÎóÂëÂÊBER=2.33333e-06
RaptorÂë£¬µ±Ç°¿ªÏú=2.00,µ±Ç°Ö¡ÊýÎª1500, ÎóÖ¡ÂÊPER=0.00000e+00,ÎóÂëÂÊBER=0.00000e+00
LTÂë£¬µ±Ç°¿ªÏú=2.00,µ±Ç°Ö¡ÊýÎª1550, ÎóÖ¡ÂÊPER=2.19355e-02,ÎóÂëÂÊBER=2.38710e-06
RaptorÂë£¬µ±Ç°¿ªÏú=2.00,µ±Ç°Ö¡ÊýÎª1550, ÎóÖ¡ÂÊPER=0.00000e+00,ÎóÂëÂÊBER=0.00000e+00
LTÂë£¬µ±Ç°¿ªÏú=2.00,µ±Ç°Ö¡ÊýÎª1600, ÎóÖ¡ÂÊPER=2.12500e-02,ÎóÂëÂÊBER=2.31250e-06
RaptorÂë£¬µ±Ç°¿ªÏú=2.00,µ±Ç°Ö¡ÊýÎª1600, ÎóÖ¡ÂÊPER=0.00000e+00,ÎóÂëÂÊBER=0.00000e+00
LTÂë£¬µ±Ç°¿ªÏú=2.00,µ±Ç°Ö¡ÊýÎª1650, ÎóÖ¡ÂÊPER=2.06061e-02,ÎóÂëÂÊBER=2.24242e-06
RaptorÂë£¬µ±Ç°¿ªÏú=2.00,µ±Ç°Ö¡ÊýÎª1650, ÎóÖ¡ÂÊPER=0.00000e+00,ÎóÂëÂÊBER=0.00000e+00
LTÂë£¬µ±Ç°¿ªÏú=2.00,µ±Ç°Ö¡ÊýÎª1700, ÎóÖ¡ÂÊPER=2.00000e-02,ÎóÂëÂÊBER=2.17647e-06
RaptorÂë£¬µ±Ç°¿ªÏú=2.00,µ±Ç°Ö¡ÊýÎª1700, ÎóÖ¡ÂÊPER=0.00000e+00,ÎóÂëÂÊBER=0.00000e+00
LTÂë£¬µ±Ç°¿ªÏú=2.00,µ±Ç°Ö¡ÊýÎª1750, ÎóÖ¡ÂÊPER=2.00000e-02,ÎóÂëÂÊBER=2.17143e-06
RaptorÂë£¬µ±Ç°¿ªÏú=2.00,µ±Ç°Ö¡ÊýÎª1750, ÎóÖ¡ÂÊPER=0.00000e+00,ÎóÂëÂÊBER=0.00000e+00
LTÂë£¬µ±Ç°¿ªÏú=2.00,µ±Ç°Ö¡ÊýÎª1800, ÎóÖ¡ÂÊPER=1.94444e-02,ÎóÂëÂÊBER=2.11111e-06
RaptorÂë£¬µ±Ç°¿ªÏú=2.00,µ±Ç°Ö¡ÊýÎª1800, ÎóÖ¡ÂÊPER=0.00000e+00,ÎóÂëÂÊBER=0.00000e+00
LTÂë£¬µ±Ç°¿ªÏú=2.00,µ±Ç°Ö¡ÊýÎª1850, ÎóÖ¡ÂÊPER=1.94595e-02,ÎóÂëÂÊBER=2.10811e-06
RaptorÂë£¬µ±Ç°¿ªÏú=2.00,µ±Ç°Ö¡ÊýÎª1850, ÎóÖ¡ÂÊPER=0.00000e+00,ÎóÂëÂÊBER=0.00000e+00
LTÂë£¬µ±Ç°¿ªÏú=2.00,µ±Ç°Ö¡ÊýÎª1900, ÎóÖ¡ÂÊPER=1.89474e-02,ÎóÂëÂÊBER=2.05263e-06
RaptorÂë£¬µ±Ç°¿ªÏú=2.00,µ±Ç°Ö¡ÊýÎª1900, ÎóÖ¡ÂÊPER=0.00000e+00,ÎóÂëÂÊBER=0.00000e+00
LTÂë£¬µ±Ç°¿ªÏú=2.00,µ±Ç°Ö¡ÊýÎª1950, ÎóÖ¡ÂÊPER=1.89744e-02,ÎóÂëÂÊBER=2.05128e-06
RaptorÂë£¬µ±Ç°¿ªÏú=2.00,µ±Ç°Ö¡ÊýÎª1950, ÎóÖ¡ÂÊPER=0.00000e+00,ÎóÂëÂÊBER=0.00000e+00
LTÂë£¬µ±Ç°¿ªÏú=2.00,µ±Ç°Ö¡ÊýÎª2000, ÎóÖ¡ÂÊPER=1.95000e-02,ÎóÂëÂÊBER=2.10000e-06
RaptorÂë£¬µ±Ç°¿ªÏú=2.00,µ±Ç°Ö¡ÊýÎª2000, ÎóÖ¡ÂÊPER=0.00000e+00,ÎóÂëÂÊBER=0.00000e+00
µ±Ç°ÐÅµÀ±ê×¼²î=100.00,¿ªÏú=2.00,µ±Ç°Ö¡ÊýÎª2000, LTÂëÎóÂëÂÊBER_LT=2.10000e-06,RaptorÎóÂëÂÊBER=0.00000e+00
ÐÅµÀ±ê×¼²î·¶Î§Îª£º
Inf  
¿ªÏú·¶Î§Îª£º
0.50  0.60  0.70  0.80  0.90  1.00  1.10  1.70  1.80  1.90  2.00  
LTÎóÂëÂÊBER_LTÎª£º
1.35735e-01  1.33040e-01  1.26365e-01  1.15315e-01  1.02045e-01  5.15250e-02  1.46100e-02  9.40000e-06  5.15000e-06  3.20000e-06  2.10000e-06  
RaptorÎóÂëÂÊBERÎª£º
1.35679e-01  1.33224e-01  1.26316e-01  1.15219e-01  1.01888e-01  5.15510e-02  1.45816e-02  0.00000e+00  0.00000e+00  0.00000e+00  0.00000e+00  
Ê±¼äÒÑ¹ý 213537.476799 Ãë¡£
