# Supplementary material for: An Efficient Design of Systematic Rateless Codes
Source: Hindawi journal article supplement (doi:10.1155/2020/8068414), 2020-05-19
Supplement: f1 [file 8068414.f1.zip › supplementary files/Matlab_code_for_Figure1/BER_by_Simulation/实际码字结果/AWGN_dist2016977_K10000_S.txt]

20190612²âÊÔËõÐ¡ÄÚÂëÊä³öLLRÐ§¹û£¬ÇÒËõ¼õÒò×ÓÎª

zoom_in =

     1


rho =

     0


sigma_n_2 =

   0.954529000000000


sigma_vec =

   Inf


dist_num =

     2.016977000000000e+03

µ±Ç°ÐÅµÀÎªPBIÐÅµÀ
K =

       10000

ÕýÔÚ¶ÔÍâÂë½øÐÐÏßÐÔPEG±àÂë£¬ÇëÉÔµÈ...
µ±Ç°Ñ¡ÔñµÄÊÇÏµÍ³Âë
´íÎó±ÈÌØÊýºÍÖ¡Êý¶¼´ïµ½Ò»¶¨Á¿£¬ÐèÒªÔö¼Ó¿ªÏú
µ±Ç°ÐÅµÀ±ê×¼²î=100.00,¿ªÏú=0.50,µ±Ç°Ö¡ÊýÎª20, LTÂëÎóÂëÂÊBER_LT=1.35976e-01,RaptorÎóÂëÂÊBER=1.36050e-01
´íÎó±ÈÌØÊýºÍÖ¡Êý¶¼´ïµ½Ò»¶¨Á¿£¬ÐèÒªÔö¼Ó¿ªÏú
µ±Ç°ÐÅµÀ±ê×¼²î=100.00,¿ªÏú=0.60,µ±Ç°Ö¡ÊýÎª20, LTÂëÎóÂëÂÊBER_LT=1.32237e-01,RaptorÎóÂëÂÊBER=1.32180e-01
´íÎó±ÈÌØÊýºÍÖ¡Êý¶¼´ïµ½Ò»¶¨Á¿£¬ÐèÒªÔö¼Ó¿ªÏú
µ±Ç°ÐÅµÀ±ê×¼²î=100.00,¿ªÏú=0.70,µ±Ç°Ö¡ÊýÎª20, LTÂëÎóÂëÂÊBER_LT=1.26205e-01,RaptorÎóÂëÂÊBER=1.26170e-01
´íÎó±ÈÌØÊýºÍÖ¡Êý¶¼´ïµ½Ò»¶¨Á¿£¬ÐèÒªÔö¼Ó¿ªÏú
µ±Ç°ÐÅµÀ±ê×¼²î=100.00,¿ªÏú=0.80,µ±Ç°Ö¡ÊýÎª20, LTÂëÎóÂëÂÊBER_LT=1.15719e-01,RaptorÎóÂëÂÊBER=1.15555e-01
´íÎó±ÈÌØÊýºÍÖ¡Êý¶¼´ïµ½Ò»¶¨Á¿£¬ÐèÒªÔö¼Ó¿ªÏú
µ±Ç°ÐÅµÀ±ê×¼²î=100.00,¿ªÏú=0.90,µ±Ç°Ö¡ÊýÎª20, LTÂëÎóÂëÂÊBER_LT=9.71580e-02,RaptorÎóÂëÂÊBER=9.71600e-02
´íÎó±ÈÌØÊýºÍÖ¡Êý¶¼´ïµ½Ò»¶¨Á¿£¬ÐèÒªÔö¼Ó¿ªÏú
µ±Ç°ÐÅµÀ±ê×¼²î=100.00,¿ªÏú=1.00,µ±Ç°Ö¡ÊýÎª20, LTÂëÎóÂëÂÊBER_LT=5.28665e-02,RaptorÎóÂëÂÊBER=5.28800e-02
´íÎó±ÈÌØÊýºÍÖ¡Êý¶¼´ïµ½Ò»¶¨Á¿£¬ÐèÒªÔö¼Ó¿ªÏú
µ±Ç°ÐÅµÀ±ê×¼²î=100.00,¿ªÏú=1.10,µ±Ç°Ö¡ÊýÎª20, LTÂëÎóÂëÂÊBER_LT=1.41856e-02,RaptorÎóÂëÂÊBER=1.41850e-02
´íÎó±ÈÌØÊýºÍÖ¡Êý¶¼´ïµ½Ò»¶¨Á¿£¬ÐèÒªÔö¼Ó¿ªÏú
µ±Ç°ÐÅµÀ±ê×¼²î=100.00,¿ªÏú=1.20,µ±Ç°Ö¡ÊýÎª20, LTÂëÎóÂëÂÊBER_LT=8.35947e-03,RaptorÎóÂëÂÊBER=8.16000e-03
´íÎó±ÈÌØÊýºÍÖ¡Êý¶¼´ïµ½Ò»¶¨Á¿£¬ÐèÒªÔö¼Ó¿ªÏú
µ±Ç°ÐÅµÀ±ê×¼²î=100.00,¿ªÏú=1.30,µ±Ç°Ö¡ÊýÎª40, LTÂëÎóÂëÂÊBER_LT=2.86652e-03,RaptorÎóÂëÂÊBER=2.26750e-03
LTÂë£¬µ±Ç°¿ªÏú=1.40,µ±Ç°Ö¡ÊýÎª50, ÎóÖ¡ÂÊPER=6.20000e-01,ÎóÂëÂÊBER=3.62603e-04
RaptorÂë£¬µ±Ç°¿ªÏú=1.40,µ±Ç°Ö¡ÊýÎª50, ÎóÖ¡ÂÊPER=6.00000e-02,ÎóÂëÂÊBER=2.20000e-04
LTÂë£¬µ±Ç°¿ªÏú=1.40,µ±Ç°Ö¡ÊýÎª100, ÎóÖ¡ÂÊPER=6.00000e-01,ÎóÂëÂÊBER=3.20463e-04
RaptorÂë£¬µ±Ç°¿ªÏú=1.40,µ±Ç°Ö¡ÊýÎª100, ÎóÖ¡ÂÊPER=4.00000e-02,ÎóÂëÂÊBER=1.60000e-04
LTÂë£¬µ±Ç°¿ªÏú=1.40,µ±Ç°Ö¡ÊýÎª150, ÎóÖ¡ÂÊPER=5.73333e-01,ÎóÂëÂÊBER=4.11603e-04
RaptorÂë£¬µ±Ç°¿ªÏú=1.40,µ±Ç°Ö¡ÊýÎª150, ÎóÖ¡ÂÊPER=5.33333e-02,ÎóÂëÂÊBER=2.24667e-04
LTÂë£¬µ±Ç°¿ªÏú=1.40,µ±Ç°Ö¡ÊýÎª200, ÎóÖ¡ÂÊPER=5.30000e-01,ÎóÂëÂÊBER=4.21893e-04
RaptorÂë£¬µ±Ç°¿ªÏú=1.40,µ±Ç°Ö¡ÊýÎª200, ÎóÖ¡ÂÊPER=5.00000e-02,ÎóÂëÂÊBER=2.07000e-04
LTÂë£¬µ±Ç°¿ªÏú=1.40,µ±Ç°Ö¡ÊýÎª250, ÎóÖ¡ÂÊPER=5.12000e-01,ÎóÂëÂÊBER=3.67699e-04
RaptorÂë£¬µ±Ç°¿ªÏú=1.40,µ±Ç°Ö¡ÊýÎª250, ÎóÖ¡ÂÊPER=4.40000e-02,ÎóÂëÂÊBER=1.80000e-04
LTÂë£¬µ±Ç°¿ªÏú=1.40,µ±Ç°Ö¡ÊýÎª300, ÎóÖ¡ÂÊPER=4.86667e-01,ÎóÂëÂÊBER=3.15563e-04
RaptorÂë£¬µ±Ç°¿ªÏú=1.40,µ±Ç°Ö¡ÊýÎª300, ÎóÖ¡ÂÊPER=3.66667e-02,ÎóÂëÂÊBER=1.50000e-04
LTÂë£¬µ±Ç°¿ªÏú=1.40,µ±Ç°Ö¡ÊýÎª350, ÎóÖ¡ÂÊPER=4.71429e-01,ÎóÂëÂÊBER=3.01282e-04
RaptorÂë£¬µ±Ç°¿ªÏú=1.40,µ±Ç°Ö¡ÊýÎª350, ÎóÖ¡ÂÊPER=3.42857e-02,ÎóÂëÂÊBER=1.41714e-04
LTÂë£¬µ±Ç°¿ªÏú=1.40,µ±Ç°Ö¡ÊýÎª400, ÎóÖ¡ÂÊPER=4.72500e-01,ÎóÂëÂÊBER=2.96697e-04
RaptorÂë£¬µ±Ç°¿ªÏú=1.40,µ±Ç°Ö¡ÊýÎª400, ÎóÖ¡ÂÊPER=3.25000e-02,ÎóÂëÂÊBER=1.39750e-04
LTÂë£¬µ±Ç°¿ªÏú=1.40,µ±Ç°Ö¡ÊýÎª450, ÎóÖ¡ÂÊPER=4.64444e-01,ÎóÂëÂÊBER=2.81371e-04
RaptorÂë£¬µ±Ç°¿ªÏú=1.40,µ±Ç°Ö¡ÊýÎª450, ÎóÖ¡ÂÊPER=2.88889e-02,ÎóÂëÂÊBER=1.24222e-04
LTÂë£¬µ±Ç°¿ªÏú=1.40,µ±Ç°Ö¡ÊýÎª500, ÎóÖ¡ÂÊPER=4.50000e-01,ÎóÂëÂÊBER=2.78126e-04
RaptorÂë£¬µ±Ç°¿ªÏú=1.40,µ±Ç°Ö¡ÊýÎª500, ÎóÖ¡ÂÊPER=3.00000e-02,ÎóÂëÂÊBER=1.24600e-04
µ±Ç°ÐÅµÀ±ê×¼²î=100.00,¿ªÏú=1.40,µ±Ç°Ö¡ÊýÎª500, LTÂëÎóÂëÂÊBER_LT=2.78126e-04,RaptorÎóÂëÂÊBER=1.24600e-04
LTÂë£¬µ±Ç°¿ªÏú=1.50,µ±Ç°Ö¡ÊýÎª50, ÎóÖ¡ÂÊPER=3.00000e-01,ÎóÂëÂÊBER=3.52803e-05
RaptorÂë£¬µ±Ç°¿ªÏú=1.50,µ±Ç°Ö¡ÊýÎª50, ÎóÖ¡ÂÊPER=0.00000e+00,ÎóÂëÂÊBER=0.00000e+00
LTÂë£¬µ±Ç°¿ªÏú=1.50,µ±Ç°Ö¡ÊýÎª100, ÎóÖ¡ÂÊPER=3.10000e-01,ÎóÂëÂÊBER=3.72403e-05
RaptorÂë£¬µ±Ç°¿ªÏú=1.50,µ±Ç°Ö¡ÊýÎª100, ÎóÖ¡ÂÊPER=0.00000e+00,ÎóÂëÂÊBER=0.00000e+00
LTÂë£¬µ±Ç°¿ªÏú=1.50,µ±Ç°Ö¡ÊýÎª150, ÎóÖ¡ÂÊPER=2.73333e-01,ÎóÂëÂÊBER=3.20136e-05
RaptorÂë£¬µ±Ç°¿ªÏú=1.50,µ±Ç°Ö¡ÊýÎª150, ÎóÖ¡ÂÊPER=0.00000e+00,ÎóÂëÂÊBER=0.00000e+00
LTÂë£¬µ±Ç°¿ªÏú=1.50,µ±Ç°Ö¡ÊýÎª200, ÎóÖ¡ÂÊPER=2.55000e-01,ÎóÂëÂÊBER=2.98902e-05
RaptorÂë£¬µ±Ç°¿ªÏú=1.50,µ±Ç°Ö¡ÊýÎª200, ÎóÖ¡ÂÊPER=0.00000e+00,ÎóÂëÂÊBER=0.00000e+00
LTÂë£¬µ±Ç°¿ªÏú=1.50,µ±Ç°Ö¡ÊýÎª250, ÎóÖ¡ÂÊPER=2.68000e-01,ÎóÂëÂÊBER=3.17523e-05
RaptorÂë£¬µ±Ç°¿ªÏú=1.50,µ±Ç°Ö¡ÊýÎª250, ÎóÖ¡ÂÊPER=0.00000e+00,ÎóÂëÂÊBER=0.00000e+00
LTÂë£¬µ±Ç°¿ªÏú=1.50,µ±Ç°Ö¡ÊýÎª300, ÎóÖ¡ÂÊPER=2.56667e-01,ÎóÂëÂÊBER=3.03802e-05
RaptorÂë£¬µ±Ç°¿ªÏú=1.50,µ±Ç°Ö¡ÊýÎª300, ÎóÖ¡ÂÊPER=0.00000e+00,ÎóÂëÂÊBER=0.00000e+00
LTÂë£¬µ±Ç°¿ªÏú=1.50,µ±Ç°Ö¡ÊýÎª350, ÎóÖ¡ÂÊPER=2.42857e-01,ÎóÂëÂÊBER=2.91202e-05
RaptorÂë£¬µ±Ç°¿ªÏú=1.50,µ±Ç°Ö¡ÊýÎª350, ÎóÖ¡ÂÊPER=0.00000e+00,ÎóÂëÂÊBER=0.00000e+00
LTÂë£¬µ±Ç°¿ªÏú=1.50,µ±Ç°Ö¡ÊýÎª400, ÎóÖ¡ÂÊPER=2.47500e-01,ÎóÂëÂÊBER=2.98902e-05
RaptorÂë£¬µ±Ç°¿ªÏú=1.50,µ±Ç°Ö¡ÊýÎª400, ÎóÖ¡ÂÊPER=0.00000e+00,ÎóÂëÂÊBER=0.00000e+00
LTÂë£¬µ±Ç°¿ªÏú=1.50,µ±Ç°Ö¡ÊýÎª450, ÎóÖ¡ÂÊPER=2.53333e-01,ÎóÂëÂÊBER=3.11425e-05
RaptorÂë£¬µ±Ç°¿ªÏú=1.50,µ±Ç°Ö¡ÊýÎª450, ÎóÖ¡ÂÊPER=0.00000e+00,ÎóÂëÂÊBER=0.00000e+00
LTÂë£¬µ±Ç°¿ªÏú=1.50,µ±Ç°Ö¡ÊýÎª500, ÎóÖ¡ÂÊPER=2.48000e-01,ÎóÂëÂÊBER=3.05762e-05
RaptorÂë£¬µ±Ç°¿ªÏú=1.50,µ±Ç°Ö¡ÊýÎª500, ÎóÖ¡ÂÊPER=0.00000e+00,ÎóÂëÂÊBER=0.00000e+00
µ±Ç°ÐÅµÀ±ê×¼²î=100.00,¿ªÏú=1.50,µ±Ç°Ö¡ÊýÎª500, LTÂëÎóÂëÂÊBER_LT=3.05762e-05,RaptorÎóÂëÂÊBER=0.00000e+00
LTÂë£¬µ±Ç°¿ªÏú=1.60,µ±Ç°Ö¡ÊýÎª50, ÎóÖ¡ÂÊPER=1.40000e-01,ÎóÂëÂÊBER=1.76401e-05
RaptorÂë£¬µ±Ç°¿ªÏú=1.60,µ±Ç°Ö¡ÊýÎª50, ÎóÖ¡ÂÊPER=0.00000e+00,ÎóÂëÂÊBER=0.00000e+00
LTÂë£¬µ±Ç°¿ªÏú=1.60,µ±Ç°Ö¡ÊýÎª100, ÎóÖ¡ÂÊPER=1.80000e-01,ÎóÂëÂÊBER=1.96002e-05
RaptorÂë£¬µ±Ç°¿ªÏú=1.60,µ±Ç°Ö¡ÊýÎª100, ÎóÖ¡ÂÊPER=0.00000e+00,ÎóÂëÂÊBER=0.00000e+00
LTÂë£¬µ±Ç°¿ªÏú=1.60,µ±Ç°Ö¡ÊýÎª150, ÎóÖ¡ÂÊPER=1.73333e-01,ÎóÂëÂÊBER=2.02535e-05
RaptorÂë£¬µ±Ç°¿ªÏú=1.60,µ±Ç°Ö¡ÊýÎª150, ÎóÖ¡ÂÊPER=0.00000e+00,ÎóÂëÂÊBER=0.00000e+00
LTÂë£¬µ±Ç°¿ªÏú=1.60,µ±Ç°Ö¡ÊýÎª200, ÎóÖ¡ÂÊPER=1.80000e-01,ÎóÂëÂÊBER=2.05802e-05
RaptorÂë£¬µ±Ç°¿ªÏú=1.60,µ±Ç°Ö¡ÊýÎª200, ÎóÖ¡ÂÊPER=0.00000e+00,ÎóÂëÂÊBER=0.00000e+00
LTÂë£¬µ±Ç°¿ªÏú=1.60,µ±Ç°Ö¡ÊýÎª250, ÎóÖ¡ÂÊPER=1.60000e-01,ÎóÂëÂÊBER=1.80321e-05
RaptorÂë£¬µ±Ç°¿ªÏú=1.60,µ±Ç°Ö¡ÊýÎª250, ÎóÖ¡ÂÊPER=0.00000e+00,ÎóÂëÂÊBER=0.00000e+00
LTÂë£¬µ±Ç°¿ªÏú=1.60,µ±Ç°Ö¡ÊýÎª300, ÎóÖ¡ÂÊPER=1.50000e-01,ÎóÂëÂÊBER=1.66601e-05
RaptorÂë£¬µ±Ç°¿ªÏú=1.60,µ±Ç°Ö¡ÊýÎª300, ÎóÖ¡ÂÊPER=0.00000e+00,ÎóÂëÂÊBER=0.00000e+00
LTÂë£¬µ±Ç°¿ªÏú=1.60,µ±Ç°Ö¡ÊýÎª350, ÎóÖ¡ÂÊPER=1.54286e-01,ÎóÂëÂÊBER=1.68001e-05
RaptorÂë£¬µ±Ç°¿ªÏú=1.60,µ±Ç°Ö¡ÊýÎª350, ÎóÖ¡ÂÊPER=0.00000e+00,ÎóÂëÂÊBER=0.00000e+00
LTÂë£¬µ±Ç°¿ªÏú=1.60,µ±Ç°Ö¡ÊýÎª400, ÎóÖ¡ÂÊPER=1.50000e-01,ÎóÂëÂÊBER=1.61701e-05
RaptorÂë£¬µ±Ç°¿ªÏú=1.60,µ±Ç°Ö¡ÊýÎª400, ÎóÖ¡ÂÊPER=0.00000e+00,ÎóÂëÂÊBER=0.00000e+00
LTÂë£¬µ±Ç°¿ªÏú=1.60,µ±Ç°Ö¡ÊýÎª450, ÎóÖ¡ÂÊPER=1.48889e-01,ÎóÂëÂÊBER=1.61157e-05
RaptorÂë£¬µ±Ç°¿ªÏú=1.60,µ±Ç°Ö¡ÊýÎª450, ÎóÖ¡ÂÊPER=0.00000e+00,ÎóÂëÂÊBER=0.00000e+00
LTÂë£¬µ±Ç°¿ªÏú=1.60,µ±Ç°Ö¡ÊýÎª500, ÎóÖ¡ÂÊPER=1.50000e-01,ÎóÂëÂÊBER=1.60721e-05
RaptorÂë£¬µ±Ç°¿ªÏú=1.60,µ±Ç°Ö¡ÊýÎª500, ÎóÖ¡ÂÊPER=0.00000e+00,ÎóÂëÂÊBER=0.00000e+00
µ±Ç°ÐÅµÀ±ê×¼²î=100.00,¿ªÏú=1.60,µ±Ç°Ö¡ÊýÎª500, LTÂëÎóÂëÂÊBER_LT=1.60721e-05,RaptorÎóÂëÂÊBER=0.00000e+00
LTÂë£¬µ±Ç°¿ªÏú=1.70,µ±Ç°Ö¡ÊýÎª50, ÎóÖ¡ÂÊPER=8.00000e-02,ÎóÂëÂÊBER=7.84006e-06
RaptorÂë£¬µ±Ç°¿ªÏú=1.70,µ±Ç°Ö¡ÊýÎª50, ÎóÖ¡ÂÊPER=0.00000e+00,ÎóÂëÂÊBER=0.00000e+00
LTÂë£¬µ±Ç°¿ªÏú=1.70,µ±Ç°Ö¡ÊýÎª100, ÎóÖ¡ÂÊPER=8.00000e-02,ÎóÂëÂÊBER=7.84006e-06
RaptorÂë£¬µ±Ç°¿ªÏú=1.70,µ±Ç°Ö¡ÊýÎª100, ÎóÖ¡ÂÊPER=0.00000e+00,ÎóÂëÂÊBER=0.00000e+00
LTÂë£¬µ±Ç°¿ªÏú=1.70,µ±Ç°Ö¡ÊýÎª150, ÎóÖ¡ÂÊPER=1.06667e-01,ÎóÂëÂÊBER=1.17601e-05
RaptorÂë£¬µ±Ç°¿ªÏú=1.70,µ±Ç°Ö¡ÊýÎª150, ÎóÖ¡ÂÊPER=0.00000e+00,ÎóÂëÂÊBER=0.00000e+00
LTÂë£¬µ±Ç°¿ªÏú=1.70,µ±Ç°Ö¡ÊýÎª200, ÎóÖ¡ÂÊPER=9.00000e-02,ÎóÂëÂÊBER=9.80008e-06
RaptorÂë£¬µ±Ç°¿ªÏú=1.70,µ±Ç°Ö¡ÊýÎª200, ÎóÖ¡ÂÊPER=0.00000e+00,ÎóÂëÂÊBER=0.00000e+00
LTÂë£¬µ±Ç°¿ªÏú=1.70,µ±Ç°Ö¡ÊýÎª250, ÎóÖ¡ÂÊPER=8.40000e-02,ÎóÂëÂÊBER=9.01607e-06
RaptorÂë£¬µ±Ç°¿ªÏú=1.70,µ±Ç°Ö¡ÊýÎª250, ÎóÖ¡ÂÊPER=0.00000e+00,ÎóÂëÂÊBER=0.00000e+00
LTÂë£¬µ±Ç°¿ªÏú=1.70,µ±Ç°Ö¡ÊýÎª300, ÎóÖ¡ÂÊPER=8.66667e-02,ÎóÂëÂÊBER=9.14674e-06
RaptorÂë£¬µ±Ç°¿ªÏú=1.70,µ±Ç°Ö¡ÊýÎª300, ÎóÖ¡ÂÊPER=0.00000e+00,ÎóÂëÂÊBER=0.00000e+00
LTÂë£¬µ±Ç°¿ªÏú=1.70,µ±Ç°Ö¡ÊýÎª350, ÎóÖ¡ÂÊPER=8.28571e-02,ÎóÂëÂÊBER=8.68007e-06
RaptorÂë£¬µ±Ç°¿ªÏú=1.70,µ±Ç°Ö¡ÊýÎª350, ÎóÖ¡ÂÊPER=0.00000e+00,ÎóÂëÂÊBER=0.00000e+00
LTÂë£¬µ±Ç°¿ªÏú=1.70,µ±Ç°Ö¡ÊýÎª400, ÎóÖ¡ÂÊPER=7.75000e-02,ÎóÂëÂÊBER=8.08506e-06
RaptorÂë£¬µ±Ç°¿ªÏú=1.70,µ±Ç°Ö¡ÊýÎª400, ÎóÖ¡ÂÊPER=0.00000e+00,ÎóÂëÂÊBER=0.00000e+00
LTÂë£¬µ±Ç°¿ªÏú=1.70,µ±Ç°Ö¡ÊýÎª450, ÎóÖ¡ÂÊPER=7.55556e-02,ÎóÂëÂÊBER=7.84006e-06
RaptorÂë£¬µ±Ç°¿ªÏú=1.70,µ±Ç°Ö¡ÊýÎª450, ÎóÖ¡ÂÊPER=0.00000e+00,ÎóÂëÂÊBER=0.00000e+00
LTÂë£¬µ±Ç°¿ªÏú=1.70,µ±Ç°Ö¡ÊýÎª500, ÎóÖ¡ÂÊPER=8.40000e-02,ÎóÂëÂÊBER=8.62407e-06
RaptorÂë£¬µ±Ç°¿ªÏú=1.70,µ±Ç°Ö¡ÊýÎª500, ÎóÖ¡ÂÊPER=0.00000e+00,ÎóÂëÂÊBER=0.00000e+00
µ±Ç°ÐÅµÀ±ê×¼²î=100.00,¿ªÏú=1.70,µ±Ç°Ö¡ÊýÎª500, LTÂëÎóÂëÂÊBER_LT=8.62407e-06,RaptorÎóÂëÂÊBER=0.00000e+00
LTÂë£¬µ±Ç°¿ªÏú=1.80,µ±Ç°Ö¡ÊýÎª50, ÎóÖ¡ÂÊPER=1.20000e-01,ÎóÂëÂÊBER=1.56801e-05
RaptorÂë£¬µ±Ç°¿ªÏú=1.80,µ±Ç°Ö¡ÊýÎª50, ÎóÖ¡ÂÊPER=0.00000e+00,ÎóÂëÂÊBER=0.00000e+00
LTÂë£¬µ±Ç°¿ªÏú=1.80,µ±Ç°Ö¡ÊýÎª100, ÎóÖ¡ÂÊPER=6.00000e-02,ÎóÂëÂÊBER=7.84006e-06
RaptorÂë£¬µ±Ç°¿ªÏú=1.80,µ±Ç°Ö¡ÊýÎª100, ÎóÖ¡ÂÊPER=0.00000e+00,ÎóÂëÂÊBER=0.00000e+00
LTÂë£¬µ±Ç°¿ªÏú=1.80,µ±Ç°Ö¡ÊýÎª150, ÎóÖ¡ÂÊPER=8.00000e-02,ÎóÂëÂÊBER=9.80008e-06
RaptorÂë£¬µ±Ç°¿ªÏú=1.80,µ±Ç°Ö¡ÊýÎª150, ÎóÖ¡ÂÊPER=0.00000e+00,ÎóÂëÂÊBER=0.00000e+00
LTÂë£¬µ±Ç°¿ªÏú=1.80,µ±Ç°Ö¡ÊýÎª200, ÎóÖ¡ÂÊPER=6.00000e-02,ÎóÂëÂÊBER=7.35006e-06
RaptorÂë£¬µ±Ç°¿ªÏú=1.80,µ±Ç°Ö¡ÊýÎª200, ÎóÖ¡ÂÊPER=0.00000e+00,ÎóÂëÂÊBER=0.00000e+00
LTÂë£¬µ±Ç°¿ªÏú=1.80,µ±Ç°Ö¡ÊýÎª250, ÎóÖ¡ÂÊPER=5.20000e-02,ÎóÂëÂÊBER=6.27205e-06
RaptorÂë£¬µ±Ç°¿ªÏú=1.80,µ±Ç°Ö¡ÊýÎª250, ÎóÖ¡ÂÊPER=0.00000e+00,ÎóÂëÂÊBER=0.00000e+00
LTÂë£¬µ±Ç°¿ªÏú=1.80,µ±Ç°Ö¡ÊýÎª300, ÎóÖ¡ÂÊPER=5.33333e-02,ÎóÂëÂÊBER=6.20672e-06
RaptorÂë£¬µ±Ç°¿ªÏú=1.80,µ±Ç°Ö¡ÊýÎª300, ÎóÖ¡ÂÊPER=0.00000e+00,ÎóÂëÂÊBER=0.00000e+00
LTÂë£¬µ±Ç°¿ªÏú=1.80,µ±Ç°Ö¡ÊýÎª350, ÎóÖ¡ÂÊPER=5.71429e-02,ÎóÂëÂÊBER=6.44005e-06
RaptorÂë£¬µ±Ç°¿ªÏú=1.80,µ±Ç°Ö¡ÊýÎª350, ÎóÖ¡ÂÊPER=0.00000e+00,ÎóÂëÂÊBER=0.00000e+00
LTÂë£¬µ±Ç°¿ªÏú=1.80,µ±Ç°Ö¡ÊýÎª400, ÎóÖ¡ÂÊPER=5.75000e-02,ÎóÂëÂÊBER=6.37005e-06
RaptorÂë£¬µ±Ç°¿ªÏú=1.80,µ±Ç°Ö¡ÊýÎª400, ÎóÖ¡ÂÊPER=0.00000e+00,ÎóÂëÂÊBER=0.00000e+00
LTÂë£¬µ±Ç°¿ªÏú=1.80,µ±Ç°Ö¡ÊýÎª450, ÎóÖ¡ÂÊPER=6.00000e-02,ÎóÂëÂÊBER=6.75117e-06
RaptorÂë£¬µ±Ç°¿ªÏú=1.80,µ±Ç°Ö¡ÊýÎª450, ÎóÖ¡ÂÊPER=0.00000e+00,ÎóÂëÂÊBER=0.00000e+00
LTÂë£¬µ±Ç°¿ªÏú=1.80,µ±Ç°Ö¡ÊýÎª500, ÎóÖ¡ÂÊPER=6.60000e-02,ÎóÂëÂÊBER=7.25206e-06
RaptorÂë£¬µ±Ç°¿ªÏú=1.80,µ±Ç°Ö¡ÊýÎª500, ÎóÖ¡ÂÊPER=0.00000e+00,ÎóÂëÂÊBER=0.00000e+00
µ±Ç°ÐÅµÀ±ê×¼²î=100.00,¿ªÏú=1.80,µ±Ç°Ö¡ÊýÎª500, LTÂëÎóÂëÂÊBER_LT=7.25206e-06,RaptorÎóÂëÂÊBER=0.00000e+00
LTÂë£¬µ±Ç°¿ªÏú=1.90,µ±Ç°Ö¡ÊýÎª50, ÎóÖ¡ÂÊPER=0.00000e+00,ÎóÂëÂÊBER=0.00000e+00
RaptorÂë£¬µ±Ç°¿ªÏú=1.90,µ±Ç°Ö¡ÊýÎª50, ÎóÖ¡ÂÊPER=0.00000e+00,ÎóÂëÂÊBER=0.00000e+00
LTÂë£¬µ±Ç°¿ªÏú=1.90,µ±Ç°Ö¡ÊýÎª100, ÎóÖ¡ÂÊPER=1.00000e-02,ÎóÂëÂÊBER=9.80008e-07
RaptorÂë£¬µ±Ç°¿ªÏú=1.90,µ±Ç°Ö¡ÊýÎª100, ÎóÖ¡ÂÊPER=0.00000e+00,ÎóÂëÂÊBER=0.00000e+00
LTÂë£¬µ±Ç°¿ªÏú=1.90,µ±Ç°Ö¡ÊýÎª150, ÎóÖ¡ÂÊPER=2.00000e-02,ÎóÂëÂÊBER=1.96002e-06
RaptorÂë£¬µ±Ç°¿ªÏú=1.90,µ±Ç°Ö¡ÊýÎª150, ÎóÖ¡ÂÊPER=0.00000e+00,ÎóÂëÂÊBER=0.00000e+00
LTÂë£¬µ±Ç°¿ªÏú=1.90,µ±Ç°Ö¡ÊýÎª200, ÎóÖ¡ÂÊPER=1.50000e-02,ÎóÂëÂÊBER=1.47001e-06
RaptorÂë£¬µ±Ç°¿ªÏú=1.90,µ±Ç°Ö¡ÊýÎª200, ÎóÖ¡ÂÊPER=0.00000e+00,ÎóÂëÂÊBER=0.00000e+00
LTÂë£¬µ±Ç°¿ªÏú=1.90,µ±Ç°Ö¡ÊýÎª250, ÎóÖ¡ÂÊPER=2.40000e-02,ÎóÂëÂÊBER=2.35202e-06
RaptorÂë£¬µ±Ç°¿ªÏú=1.90,µ±Ç°Ö¡ÊýÎª250, ÎóÖ¡ÂÊPER=0.00000e+00,ÎóÂëÂÊBER=0.00000e+00
LTÂë£¬µ±Ç°¿ªÏú=1.90,µ±Ç°Ö¡ÊýÎª300, ÎóÖ¡ÂÊPER=2.33333e-02,ÎóÂëÂÊBER=2.28668e-06
RaptorÂë£¬µ±Ç°¿ªÏú=1.90,µ±Ç°Ö¡ÊýÎª300, ÎóÖ¡ÂÊPER=0.00000e+00,ÎóÂëÂÊBER=0.00000e+00
LTÂë£¬µ±Ç°¿ªÏú=1.90,µ±Ç°Ö¡ÊýÎª350, ÎóÖ¡ÂÊPER=2.85714e-02,ÎóÂëÂÊBER=2.80002e-06
RaptorÂë£¬µ±Ç°¿ªÏú=1.90,µ±Ç°Ö¡ÊýÎª350, ÎóÖ¡ÂÊPER=0.00000e+00,ÎóÂëÂÊBER=0.00000e+00
LTÂë£¬µ±Ç°¿ªÏú=1.90,µ±Ç°Ö¡ÊýÎª400, ÎóÖ¡ÂÊPER=3.00000e-02,ÎóÂëÂÊBER=3.18503e-06
RaptorÂë£¬µ±Ç°¿ªÏú=1.90,µ±Ç°Ö¡ÊýÎª400, ÎóÖ¡ÂÊPER=0.00000e+00,ÎóÂëÂÊBER=0.00000e+00
LTÂë£¬µ±Ç°¿ªÏú=1.90,µ±Ç°Ö¡ÊýÎª450, ÎóÖ¡ÂÊPER=2.88889e-02,ÎóÂëÂÊBER=3.04891e-06
RaptorÂë£¬µ±Ç°¿ªÏú=1.90,µ±Ç°Ö¡ÊýÎª450, ÎóÖ¡ÂÊPER=0.00000e+00,ÎóÂëÂÊBER=0.00000e+00
LTÂë£¬µ±Ç°¿ªÏú=1.90,µ±Ç°Ö¡ÊýÎª500, ÎóÖ¡ÂÊPER=2.80000e-02,ÎóÂëÂÊBER=3.13603e-06
RaptorÂë£¬µ±Ç°¿ªÏú=1.90,µ±Ç°Ö¡ÊýÎª500, ÎóÖ¡ÂÊPER=0.00000e+00,ÎóÂëÂÊBER=0.00000e+00
µ±Ç°ÐÅµÀ±ê×¼²î=100.00,¿ªÏú=1.90,µ±Ç°Ö¡ÊýÎª500, LTÂëÎóÂëÂÊBER_LT=3.13603e-06,RaptorÎóÂëÂÊBER=0.00000e+00
LTÂë£¬µ±Ç°¿ªÏú=2.00,µ±Ç°Ö¡ÊýÎª50, ÎóÖ¡ÂÊPER=4.00000e-02,ÎóÂëÂÊBER=5.88005e-06
RaptorÂë£¬µ±Ç°¿ªÏú=2.00,µ±Ç°Ö¡ÊýÎª50, ÎóÖ¡ÂÊPER=0.00000e+00,ÎóÂëÂÊBER=0.00000e+00
LTÂë£¬µ±Ç°¿ªÏú=2.00,µ±Ç°Ö¡ÊýÎª100, ÎóÖ¡ÂÊPER=2.00000e-02,ÎóÂëÂÊBER=2.94002e-06
RaptorÂë£¬µ±Ç°¿ªÏú=2.00,µ±Ç°Ö¡ÊýÎª100, ÎóÖ¡ÂÊPER=0.00000e+00,ÎóÂëÂÊBER=0.00000e+00
LTÂë£¬µ±Ç°¿ªÏú=2.00,µ±Ç°Ö¡ÊýÎª150, ÎóÖ¡ÂÊPER=1.33333e-02,ÎóÂëÂÊBER=1.96002e-06
RaptorÂë£¬µ±Ç°¿ªÏú=2.00,µ±Ç°Ö¡ÊýÎª150, ÎóÖ¡ÂÊPER=0.00000e+00,ÎóÂëÂÊBER=0.00000e+00
LTÂë£¬µ±Ç°¿ªÏú=2.00,µ±Ç°Ö¡ÊýÎª200, ÎóÖ¡ÂÊPER=2.00000e-02,ÎóÂëÂÊBER=2.45002e-06
RaptorÂë£¬µ±Ç°¿ªÏú=2.00,µ±Ç°Ö¡ÊýÎª200, ÎóÖ¡ÂÊPER=0.00000e+00,ÎóÂëÂÊBER=0.00000e+00
LTÂë£¬µ±Ç°¿ªÏú=2.00,µ±Ç°Ö¡ÊýÎª250, ÎóÖ¡ÂÊPER=1.60000e-02,ÎóÂëÂÊBER=1.96002e-06
RaptorÂë£¬µ±Ç°¿ªÏú=2.00,µ±Ç°Ö¡ÊýÎª250, ÎóÖ¡ÂÊPER=0.00000e+00,ÎóÂëÂÊBER=0.00000e+00
LTÂë£¬µ±Ç°¿ªÏú=2.00,µ±Ç°Ö¡ÊýÎª300, ÎóÖ¡ÂÊPER=1.33333e-02,ÎóÂëÂÊBER=1.63335e-06
RaptorÂë£¬µ±Ç°¿ªÏú=2.00,µ±Ç°Ö¡ÊýÎª300, ÎóÖ¡ÂÊPER=0.00000e+00,ÎóÂëÂÊBER=0.00000e+00
LTÂë£¬µ±Ç°¿ªÏú=2.00,µ±Ç°Ö¡ÊýÎª350, ÎóÖ¡ÂÊPER=1.14286e-02,ÎóÂëÂÊBER=1.40001e-06
RaptorÂë£¬µ±Ç°¿ªÏú=2.00,µ±Ç°Ö¡ÊýÎª350, ÎóÖ¡ÂÊPER=0.00000e+00,ÎóÂëÂÊBER=0.00000e+00
LTÂë£¬µ±Ç°¿ªÏú=2.00,µ±Ç°Ö¡ÊýÎª400, ÎóÖ¡ÂÊPER=1.50000e-02,ÎóÂëÂÊBER=1.71501e-06
RaptorÂë£¬µ±Ç°¿ªÏú=2.00,µ±Ç°Ö¡ÊýÎª400, ÎóÖ¡ÂÊPER=0.00000e+00,ÎóÂëÂÊBER=0.00000e+00
LTÂë£¬µ±Ç°¿ªÏú=2.00,µ±Ç°Ö¡ÊýÎª450, ÎóÖ¡ÂÊPER=1.33333e-02,ÎóÂëÂÊBER=1.52446e-06
RaptorÂë£¬µ±Ç°¿ªÏú=2.00,µ±Ç°Ö¡ÊýÎª450, ÎóÖ¡ÂÊPER=0.00000e+00,ÎóÂëÂÊBER=0.00000e+00
LTÂë£¬µ±Ç°¿ªÏú=2.00,µ±Ç°Ö¡ÊýÎª500, ÎóÖ¡ÂÊPER=1.20000e-02,ÎóÂëÂÊBER=1.37201e-06
RaptorÂë£¬µ±Ç°¿ªÏú=2.00,µ±Ç°Ö¡ÊýÎª500, ÎóÖ¡ÂÊPER=0.00000e+00,ÎóÂëÂÊBER=0.00000e+00
µ±Ç°ÐÅµÀ±ê×¼²î=100.00,¿ªÏú=2.00,µ±Ç°Ö¡ÊýÎª500, LTÂëÎóÂëÂÊBER_LT=1.37201e-06,RaptorÎóÂëÂÊBER=0.00000e+00
ÐÅµÀ±ê×¼²î·¶Î§Îª£º
Inf  
¿ªÏú·¶Î§Îª£º
0.50  0.60  0.70  0.80  0.90  1.00  1.10  1.20  1.30  1.40  1.50  1.60  1.70  1.80  1.90  2.00  
LTÎóÂëÂÊBER_LTÎª£º
1.35976e-01  1.32237e-01  1.26205e-01  1.15719e-01  9.71580e-02  5.28665e-02  1.41856e-02  8.35947e-03  2.86652e-03  2.78126e-04  3.05762e-05  1.60721e-05  8.62407e-06  7.25206e-06  3.13603e-06  1.37201e-06  
RaptorÎóÂëÂÊBERÎª£º
1.36050e-01  1.32180e-01  1.26170e-01  1.15555e-01  9.71600e-02  5.28800e-02  1.41850e-02  8.16000e-03  2.26750e-03  1.24600e-04  0.00000e+00  0.00000e+00  0.00000e+00  0.00000e+00  0.00000e+00  0.00000e+00  
Ê±¼äÒÑ¹ý 137740.082576 Ãë¡£
