# Supplementary material for: An Efficient Design of Systematic Rateless Codes
Source: Hindawi journal article supplement (doi:10.1155/2020/8068414), 2020-05-19
Supplement: f1 [file 8068414.f1.zip › supplementary files/Matlab_code_for_Figure1/BER_by_Simulation/实际码字结果/AWGN_dist2016977_K10000_S_detail.txt]

20190612²âÊÔËõÐ¡ÄÚÂëÊä³öLLRÐ§¹û£¬ÇÒËõ¼õÒò×ÓÎª

zoom_in =

     1


rho =

     0


sigma_n_2 =

   0.954529000000000


sigma_vec =

   Inf


dist_num =

     2.016977000000000e+03

µ±Ç°ÐÅµÀÎªPBIÐÅµÀ
K =

       10000

ÕýÔÚ¶ÔÍâÂë½øÐÐÏßÐÔPEG±àÂë£¬ÇëÉÔµÈ...
µ±Ç°Ñ¡ÔñµÄÊÇÏµÍ³Âë
LTÂë£¬µ±Ç°¿ªÏú=1.40,µ±Ç°Ö¡ÊýÎª100, ÎóÖ¡ÂÊPER=4.70000e-01,ÎóÂëÂÊBER=3.10662e-04
RaptorÂë£¬µ±Ç°¿ªÏú=1.40,µ±Ç°Ö¡ÊýÎª100, ÎóÖ¡ÂÊPER=5.00000e-02,ÎóÂëÂÊBER=2.24000e-04
LTÂë£¬µ±Ç°¿ªÏú=1.40,µ±Ç°Ö¡ÊýÎª200, ÎóÖ¡ÂÊPER=4.80000e-01,ÎóÂëÂÊBER=4.09153e-04
RaptorÂë£¬µ±Ç°¿ªÏú=1.40,µ±Ç°Ö¡ÊýÎª200, ÎóÖ¡ÂÊPER=6.00000e-02,ÎóÂëÂÊBER=2.69000e-04
LTÂë£¬µ±Ç°¿ªÏú=1.40,µ±Ç°Ö¡ÊýÎª300, ÎóÖ¡ÂÊPER=4.76667e-01,ÎóÂëÂÊBER=3.50516e-04
RaptorÂë£¬µ±Ç°¿ªÏú=1.40,µ±Ç°Ö¡ÊýÎª300, ÎóÖ¡ÂÊPER=5.00000e-02,ÎóÂëÂÊBER=2.24333e-04
´íÎó±ÈÌØÊýºÍÖ¡Êý¶¼´ïµ½Ò»¶¨Á¿£¬ÐèÒªÔö¼Ó¿ªÏú
µ±Ç°ÐÅµÀ±ê×¼²î=100.00,¿ªÏú=1.40,µ±Ç°Ö¡ÊýÎª396, LTÂëÎóÂëÂÊBER_LT=3.46220e-04,RaptorÎóÂëÂÊBER=2.15909e-04
LTÂë£¬µ±Ç°¿ªÏú=1.45,µ±Ç°Ö¡ÊýÎª100, ÎóÖ¡ÂÊPER=3.10000e-01,ÎóÂëÂÊBER=3.92003e-05
RaptorÂë£¬µ±Ç°¿ªÏú=1.45,µ±Ç°Ö¡ÊýÎª100, ÎóÖ¡ÂÊPER=0.00000e+00,ÎóÂëÂÊBER=0.00000e+00
LTÂë£¬µ±Ç°¿ªÏú=1.45,µ±Ç°Ö¡ÊýÎª200, ÎóÖ¡ÂÊPER=3.10000e-01,ÎóÂëÂÊBER=5.24304e-05
RaptorÂë£¬µ±Ç°¿ªÏú=1.45,µ±Ç°Ö¡ÊýÎª200, ÎóÖ¡ÂÊPER=5.00000e-03,ÎóÂëÂÊBER=1.65000e-05
LTÂë£¬µ±Ç°¿ªÏú=1.45,µ±Ç°Ö¡ÊýÎª300, ÎóÖ¡ÂÊPER=3.20000e-01,ÎóÂëÂÊBER=6.30472e-05
RaptorÂë£¬µ±Ç°¿ªÏú=1.45,µ±Ç°Ö¡ÊýÎª300, ÎóÖ¡ÂÊPER=3.33333e-03,ÎóÂëÂÊBER=1.10000e-05
LTÂë£¬µ±Ç°¿ªÏú=1.45,µ±Ç°Ö¡ÊýÎª400, ÎóÖ¡ÂÊPER=3.22500e-01,ÎóÂëÂÊBER=6.22305e-05
RaptorÂë£¬µ±Ç°¿ªÏú=1.45,µ±Ç°Ö¡ÊýÎª400, ÎóÖ¡ÂÊPER=2.50000e-03,ÎóÂëÂÊBER=8.25000e-06
LTÂë£¬µ±Ç°¿ªÏú=1.45,µ±Ç°Ö¡ÊýÎª500, ÎóÖ¡ÂÊPER=3.22000e-01,ÎóÂëÂÊBER=5.84085e-05
RaptorÂë£¬µ±Ç°¿ªÏú=1.45,µ±Ç°Ö¡ÊýÎª500, ÎóÖ¡ÂÊPER=2.00000e-03,ÎóÂëÂÊBER=6.60000e-06
LTÂë£¬µ±Ç°¿ªÏú=1.45,µ±Ç°Ö¡ÊýÎª600, ÎóÖ¡ÂÊPER=3.28333e-01,ÎóÂëÂÊBER=5.74938e-05
RaptorÂë£¬µ±Ç°¿ªÏú=1.45,µ±Ç°Ö¡ÊýÎª600, ÎóÖ¡ÂÊPER=1.66667e-03,ÎóÂëÂÊBER=5.50000e-06
LTÂë£¬µ±Ç°¿ªÏú=1.45,µ±Ç°Ö¡ÊýÎª700, ÎóÖ¡ÂÊPER=3.32857e-01,ÎóÂëÂÊBER=5.58604e-05
RaptorÂë£¬µ±Ç°¿ªÏú=1.45,µ±Ç°Ö¡ÊýÎª700, ÎóÖ¡ÂÊPER=1.42857e-03,ÎóÂëÂÊBER=4.71429e-06
LTÂë£¬µ±Ç°¿ªÏú=1.45,µ±Ç°Ö¡ÊýÎª800, ÎóÖ¡ÂÊPER=3.31250e-01,ÎóÂëÂÊBER=5.37779e-05
RaptorÂë£¬µ±Ç°¿ªÏú=1.45,µ±Ç°Ö¡ÊýÎª800, ÎóÖ¡ÂÊPER=1.25000e-03,ÎóÂëÂÊBER=4.12500e-06
LTÂë£¬µ±Ç°¿ªÏú=1.45,µ±Ç°Ö¡ÊýÎª900, ÎóÖ¡ÂÊPER=3.28889e-01,ÎóÂëÂÊBER=5.48804e-05
RaptorÂë£¬µ±Ç°¿ªÏú=1.45,µ±Ç°Ö¡ÊýÎª900, ÎóÖ¡ÂÊPER=1.11111e-03,ÎóÂëÂÊBER=3.66667e-06
LTÂë£¬µ±Ç°¿ªÏú=1.45,µ±Ç°Ö¡ÊýÎª1000, ÎóÖ¡ÂÊPER=3.31000e-01,ÎóÂëÂÊBER=5.41944e-05
RaptorÂë£¬µ±Ç°¿ªÏú=1.45,µ±Ç°Ö¡ÊýÎª1000, ÎóÖ¡ÂÊPER=1.00000e-03,ÎóÂëÂÊBER=3.30000e-06
µ±Ç°ÐÅµÀ±ê×¼²î=100.00,¿ªÏú=1.45,µ±Ç°Ö¡ÊýÎª1000, LTÂëÎóÂëÂÊBER_LT=5.41944e-05,RaptorÎóÂëÂÊBER=3.30000e-06
RaptorÎóÂëÂÊ´ïµ½ÒªÇó£¬²»ÔÙÔö¼ÓÐÅÔë±È
ÐÅµÀ±ê×¼²î·¶Î§Îª£º
Inf  
¿ªÏú·¶Î§Îª£º
1.40  1.45  1.50  1.55  1.60  1.65  1.70  1.75  1.80  
LTÎóÂëÂÊBER_LTÎª£º
3.46220e-04  5.41944e-05  0.00000e+00  0.00000e+00  0.00000e+00  0.00000e+00  0.00000e+00  0.00000e+00  0.00000e+00  
RaptorÎóÂëÂÊBERÎª£º
2.15909e-04  3.30000e-06  0.00000e+00  0.00000e+00  0.00000e+00  0.00000e+00  0.00000e+00  0.00000e+00  0.00000e+00  
Ê±¼äÒÑ¹ý 64711.275324 Ãë¡£
