# Supplementary material for: An Efficient Design of Systematic Rateless Codes
Source: Hindawi journal article supplement (doi:10.1155/2020/8068414), 2020-05-19
Supplement: f1 [file 8068414.f1.zip › supplementary files/Matlab_code_for_Figure1/BER_by_Simulation/实际码字结果/AWGN_dist2016977_K10000_S_detail2.txt]

20190612²âÊÔËõÐ¡ÄÚÂëÊä³öLLRÐ§¹û£¬ÇÒËõ¼õÒò×ÓÎª

zoom_in =

     1


rho =

     0


sigma_n_2 =

   0.954529000000000


sigma_vec =

   Inf


dist_num =

     2.016977000000000e+03

µ±Ç°ÐÅµÀÎªPBIÐÅµÀ
K =

       10000

ÕýÔÚ¶ÔÍâÂë½øÐÐÏßÐÔPEG±àÂë£¬ÇëÉÔµÈ...
µ±Ç°Ñ¡ÔñµÄÊÇÏµÍ³Âë
LTÂë£¬µ±Ç°¿ªÏú=1.45,µ±Ç°Ö¡ÊýÎª100, ÎóÖ¡ÂÊPER=2.80000e-01,ÎóÂëÂÊBER=3.92003e-05
RaptorÂë£¬µ±Ç°¿ªÏú=1.45,µ±Ç°Ö¡ÊýÎª100, ÎóÖ¡ÂÊPER=0.00000e+00,ÎóÂëÂÊBER=0.00000e+00
LTÂë£¬µ±Ç°¿ªÏú=1.45,µ±Ç°Ö¡ÊýÎª200, ÎóÖ¡ÂÊPER=2.60000e-01,ÎóÂëÂÊBER=3.23403e-05
RaptorÂë£¬µ±Ç°¿ªÏú=1.45,µ±Ç°Ö¡ÊýÎª200, ÎóÖ¡ÂÊPER=0.00000e+00,ÎóÂëÂÊBER=0.00000e+00
LTÂë£¬µ±Ç°¿ªÏú=1.45,µ±Ç°Ö¡ÊýÎª300, ÎóÖ¡ÂÊPER=2.53333e-01,ÎóÂëÂÊBER=4.57337e-05
RaptorÂë£¬µ±Ç°¿ªÏú=1.45,µ±Ç°Ö¡ÊýÎª300, ÎóÖ¡ÂÊPER=3.33333e-03,ÎóÂëÂÊBER=1.30000e-05
LTÂë£¬µ±Ç°¿ªÏú=1.45,µ±Ç°Ö¡ÊýÎª400, ÎóÖ¡ÂÊPER=3.10000e-01,ÎóÂëÂÊBER=5.97805e-05
RaptorÂë£¬µ±Ç°¿ªÏú=1.45,µ±Ç°Ö¡ÊýÎª400, ÎóÖ¡ÂÊPER=2.50000e-03,ÎóÂëÂÊBER=9.75000e-06
LTÂë£¬µ±Ç°¿ªÏú=1.45,µ±Ç°Ö¡ÊýÎª500, ÎóÖ¡ÂÊPER=3.22000e-01,ÎóÂëÂÊBER=5.91925e-05
RaptorÂë£¬µ±Ç°¿ªÏú=1.45,µ±Ç°Ö¡ÊýÎª500, ÎóÖ¡ÂÊPER=2.00000e-03,ÎóÂëÂÊBER=7.80000e-06
LTÂë£¬µ±Ç°¿ªÏú=1.45,µ±Ç°Ö¡ÊýÎª600, ÎóÖ¡ÂÊPER=3.05000e-01,ÎóÂëÂÊBER=5.39004e-05
RaptorÂë£¬µ±Ç°¿ªÏú=1.45,µ±Ç°Ö¡ÊýÎª600, ÎóÖ¡ÂÊPER=1.66667e-03,ÎóÂëÂÊBER=6.50000e-06
LTÂë£¬µ±Ç°¿ªÏú=1.45,µ±Ç°Ö¡ÊýÎª700, ÎóÖ¡ÂÊPER=3.00000e-01,ÎóÂëÂÊBER=5.15204e-05
RaptorÂë£¬µ±Ç°¿ªÏú=1.45,µ±Ç°Ö¡ÊýÎª700, ÎóÖ¡ÂÊPER=1.42857e-03,ÎóÂëÂÊBER=5.57143e-06
LTÂë£¬µ±Ç°¿ªÏú=1.45,µ±Ç°Ö¡ÊýÎª800, ÎóÖ¡ÂÊPER=3.06250e-01,ÎóÂëÂÊBER=5.09604e-05
RaptorÂë£¬µ±Ç°¿ªÏú=1.45,µ±Ç°Ö¡ÊýÎª800, ÎóÖ¡ÂÊPER=1.25000e-03,ÎóÂëÂÊBER=4.87500e-06
LTÂë£¬µ±Ç°¿ªÏú=1.45,µ±Ç°Ö¡ÊýÎª900, ÎóÖ¡ÂÊPER=3.06667e-01,ÎóÂëÂÊBER=5.50982e-05
RaptorÂë£¬µ±Ç°¿ªÏú=1.45,µ±Ç°Ö¡ÊýÎª900, ÎóÖ¡ÂÊPER=2.22222e-03,ÎóÂëÂÊBER=7.77778e-06
LTÂë£¬µ±Ç°¿ªÏú=1.45,µ±Ç°Ö¡ÊýÎª1000, ÎóÖ¡ÂÊPER=3.09000e-01,ÎóÂëÂÊBER=5.39004e-05
RaptorÂë£¬µ±Ç°¿ªÏú=1.45,µ±Ç°Ö¡ÊýÎª1000, ÎóÖ¡ÂÊPER=2.00000e-03,ÎóÂëÂÊBER=7.00000e-06
LTÂë£¬µ±Ç°¿ªÏú=1.45,µ±Ç°Ö¡ÊýÎª1100, ÎóÖ¡ÂÊPER=3.11818e-01,ÎóÂëÂÊBER=5.32768e-05
RaptorÂë£¬µ±Ç°¿ªÏú=1.45,µ±Ç°Ö¡ÊýÎª1100, ÎóÖ¡ÂÊPER=1.81818e-03,ÎóÂëÂÊBER=6.36364e-06
LTÂë£¬µ±Ç°¿ªÏú=1.45,µ±Ç°Ö¡ÊýÎª1200, ÎóÖ¡ÂÊPER=3.15833e-01,ÎóÂëÂÊBER=5.25938e-05
RaptorÂë£¬µ±Ç°¿ªÏú=1.45,µ±Ç°Ö¡ÊýÎª1200, ÎóÖ¡ÂÊPER=1.66667e-03,ÎóÂëÂÊBER=5.83333e-06
LTÂë£¬µ±Ç°¿ªÏú=1.45,µ±Ç°Ö¡ÊýÎª1300, ÎóÖ¡ÂÊPER=3.15385e-01,ÎóÂëÂÊBER=5.17896e-05
RaptorÂë£¬µ±Ç°¿ªÏú=1.45,µ±Ç°Ö¡ÊýÎª1300, ÎóÖ¡ÂÊPER=1.53846e-03,ÎóÂëÂÊBER=5.38462e-06
LTÂë£¬µ±Ç°¿ªÏú=1.45,µ±Ç°Ö¡ÊýÎª1400, ÎóÖ¡ÂÊPER=3.09286e-01,ÎóÂëÂÊBER=5.06804e-05
RaptorÂë£¬µ±Ç°¿ªÏú=1.45,µ±Ç°Ö¡ÊýÎª1400, ÎóÖ¡ÂÊPER=1.42857e-03,ÎóÂëÂÊBER=5.00000e-06
LTÂë£¬µ±Ç°¿ªÏú=1.45,µ±Ç°Ö¡ÊýÎª1500, ÎóÖ¡ÂÊPER=3.13333e-01,ÎóÂëÂÊBER=5.42924e-05
RaptorÂë£¬µ±Ç°¿ªÏú=1.45,µ±Ç°Ö¡ÊýÎª1500, ÎóÖ¡ÂÊPER=2.00000e-03,ÎóÂëÂÊBER=7.80000e-06
LTÂë£¬µ±Ç°¿ªÏú=1.45,µ±Ç°Ö¡ÊýÎª1600, ÎóÖ¡ÂÊPER=3.15000e-01,ÎóÂëÂÊBER=5.38392e-05
RaptorÂë£¬µ±Ç°¿ªÏú=1.45,µ±Ç°Ö¡ÊýÎª1600, ÎóÖ¡ÂÊPER=1.87500e-03,ÎóÂëÂÊBER=7.31250e-06
LTÂë£¬µ±Ç°¿ªÏú=1.45,µ±Ç°Ö¡ÊýÎª1700, ÎóÖ¡ÂÊPER=3.12353e-01,ÎóÂëÂÊBER=5.28628e-05
RaptorÂë£¬µ±Ç°¿ªÏú=1.45,µ±Ç°Ö¡ÊýÎª1700, ÎóÖ¡ÂÊPER=1.76471e-03,ÎóÂëÂÊBER=6.88235e-06
LTÂë£¬µ±Ç°¿ªÏú=1.45,µ±Ç°Ö¡ÊýÎª1800, ÎóÖ¡ÂÊPER=3.13889e-01,ÎóÂëÂÊBER=5.23215e-05
RaptorÂë£¬µ±Ç°¿ªÏú=1.45,µ±Ç°Ö¡ÊýÎª1800, ÎóÖ¡ÂÊPER=1.66667e-03,ÎóÂëÂÊBER=6.50000e-06
LTÂë£¬µ±Ç°¿ªÏú=1.45,µ±Ç°Ö¡ÊýÎª1900, ÎóÖ¡ÂÊPER=3.11053e-01,ÎóÂëÂÊBER=5.14246e-05
RaptorÂë£¬µ±Ç°¿ªÏú=1.45,µ±Ç°Ö¡ÊýÎª1900, ÎóÖ¡ÂÊPER=1.57895e-03,ÎóÂëÂÊBER=6.15789e-06
LTÂë£¬µ±Ç°¿ªÏú=1.45,µ±Ç°Ö¡ÊýÎª2000, ÎóÖ¡ÂÊPER=3.11500e-01,ÎóÂëÂÊBER=5.34594e-05
RaptorÂë£¬µ±Ç°¿ªÏú=1.45,µ±Ç°Ö¡ÊýÎª2000, ÎóÖ¡ÂÊPER=2.00000e-03,ÎóÂëÂÊBER=8.40000e-06
LTÂë£¬µ±Ç°¿ªÏú=1.45,µ±Ç°Ö¡ÊýÎª2100, ÎóÖ¡ÂÊPER=3.11429e-01,ÎóÂëÂÊBER=5.28738e-05
RaptorÂë£¬µ±Ç°¿ªÏú=1.45,µ±Ç°Ö¡ÊýÎª2100, ÎóÖ¡ÂÊPER=1.90476e-03,ÎóÂëÂÊBER=8.00000e-06
LTÂë£¬µ±Ç°¿ªÏú=1.45,µ±Ç°Ö¡ÊýÎª2200, ÎóÖ¡ÂÊPER=3.13182e-01,ÎóÂëÂÊBER=5.28313e-05
RaptorÂë£¬µ±Ç°¿ªÏú=1.45,µ±Ç°Ö¡ÊýÎª2200, ÎóÖ¡ÂÊPER=1.81818e-03,ÎóÂëÂÊBER=7.63636e-06
LTÂë£¬µ±Ç°¿ªÏú=1.45,µ±Ç°Ö¡ÊýÎª2300, ÎóÖ¡ÂÊPER=3.14348e-01,ÎóÂëÂÊBER=5.43265e-05
RaptorÂë£¬µ±Ç°¿ªÏú=1.45,µ±Ç°Ö¡ÊýÎª2300, ÎóÖ¡ÂÊPER=2.17391e-03,ÎóÂëÂÊBER=9.08696e-06
LTÂë£¬µ±Ç°¿ªÏú=1.45,µ±Ç°Ö¡ÊýÎª2400, ÎóÖ¡ÂÊPER=3.13750e-01,ÎóÂëÂÊBER=5.38188e-05
RaptorÂë£¬µ±Ç°¿ªÏú=1.45,µ±Ç°Ö¡ÊýÎª2400, ÎóÖ¡ÂÊPER=2.08333e-03,ÎóÂëÂÊBER=8.70833e-06
LTÂë£¬µ±Ç°¿ªÏú=1.45,µ±Ç°Ö¡ÊýÎª2500, ÎóÖ¡ÂÊPER=3.14000e-01,ÎóÂëÂÊBER=5.31556e-05
RaptorÂë£¬µ±Ç°¿ªÏú=1.45,µ±Ç°Ö¡ÊýÎª2500, ÎóÖ¡ÂÊPER=2.00000e-03,ÎóÂëÂÊBER=8.36000e-06
LTÂë£¬µ±Ç°¿ªÏú=1.45,µ±Ç°Ö¡ÊýÎª2600, ÎóÖ¡ÂÊPER=3.12692e-01,ÎóÂëÂÊBER=5.24304e-05
RaptorÂë£¬µ±Ç°¿ªÏú=1.45,µ±Ç°Ö¡ÊýÎª2600, ÎóÖ¡ÂÊPER=1.92308e-03,ÎóÂëÂÊBER=8.03846e-06
LTÂë£¬µ±Ç°¿ªÏú=1.45,µ±Ç°Ö¡ÊýÎª2700, ÎóÖ¡ÂÊPER=3.13704e-01,ÎóÂëÂÊBER=5.21219e-05
RaptorÂë£¬µ±Ç°¿ªÏú=1.45,µ±Ç°Ö¡ÊýÎª2700, ÎóÖ¡ÂÊPER=1.85185e-03,ÎóÂëÂÊBER=7.74074e-06
LTÂë£¬µ±Ç°¿ªÏú=1.45,µ±Ç°Ö¡ÊýÎª2800, ÎóÖ¡ÂÊPER=3.11071e-01,ÎóÂëÂÊBER=5.15204e-05
RaptorÂë£¬µ±Ç°¿ªÏú=1.45,µ±Ç°Ö¡ÊýÎª2800, ÎóÖ¡ÂÊPER=1.78571e-03,ÎóÂëÂÊBER=7.46429e-06
LTÂë£¬µ±Ç°¿ªÏú=1.45,µ±Ç°Ö¡ÊýÎª2900, ÎóÖ¡ÂÊPER=3.10690e-01,ÎóÂëÂÊBER=5.26839e-05
RaptorÂë£¬µ±Ç°¿ªÏú=1.45,µ±Ç°Ö¡ÊýÎª2900, ÎóÖ¡ÂÊPER=2.06897e-03,ÎóÂëÂÊBER=8.62069e-06
LTÂë£¬µ±Ç°¿ªÏú=1.45,µ±Ç°Ö¡ÊýÎª3000, ÎóÖ¡ÂÊPER=3.09667e-01,ÎóÂëÂÊBER=5.22018e-05
RaptorÂë£¬µ±Ç°¿ªÏú=1.45,µ±Ç°Ö¡ÊýÎª3000, ÎóÖ¡ÂÊPER=2.00000e-03,ÎóÂëÂÊBER=8.33333e-06
LTÂë£¬µ±Ç°¿ªÏú=1.45,µ±Ç°Ö¡ÊýÎª3100, ÎóÖ¡ÂÊPER=3.10645e-01,ÎóÂëÂÊBER=5.20669e-05
RaptorÂë£¬µ±Ç°¿ªÏú=1.45,µ±Ç°Ö¡ÊýÎª3100, ÎóÖ¡ÂÊPER=1.93548e-03,ÎóÂëÂÊBER=8.06452e-06
LTÂë£¬µ±Ç°¿ªÏú=1.45,µ±Ç°Ö¡ÊýÎª3200, ÎóÖ¡ÂÊPER=3.11563e-01,ÎóÂëÂÊBER=5.20629e-05
RaptorÂë£¬µ±Ç°¿ªÏú=1.45,µ±Ç°Ö¡ÊýÎª3200, ÎóÖ¡ÂÊPER=1.87500e-03,ÎóÂëÂÊBER=7.81250e-06
LTÂë£¬µ±Ç°¿ªÏú=1.45,µ±Ç°Ö¡ÊýÎª3300, ÎóÖ¡ÂÊPER=3.12121e-01,ÎóÂëÂÊBER=5.17622e-05
RaptorÂë£¬µ±Ç°¿ªÏú=1.45,µ±Ç°Ö¡ÊýÎª3300, ÎóÖ¡ÂÊPER=1.81818e-03,ÎóÂëÂÊBER=7.57576e-06
LTÂë£¬µ±Ç°¿ªÏú=1.45,µ±Ç°Ö¡ÊýÎª3400, ÎóÖ¡ÂÊPER=3.12059e-01,ÎóÂëÂÊBER=5.15081e-05
RaptorÂë£¬µ±Ç°¿ªÏú=1.45,µ±Ç°Ö¡ÊýÎª3400, ÎóÖ¡ÂÊPER=1.76471e-03,ÎóÂëÂÊBER=7.35294e-06
LTÂë£¬µ±Ç°¿ªÏú=1.45,µ±Ç°Ö¡ÊýÎª3500, ÎóÖ¡ÂÊPER=3.11429e-01,ÎóÂëÂÊBER=5.12404e-05
RaptorÂë£¬µ±Ç°¿ªÏú=1.45,µ±Ç°Ö¡ÊýÎª3500, ÎóÖ¡ÂÊPER=1.71429e-03,ÎóÂëÂÊBER=7.14286e-06
LTÂë£¬µ±Ç°¿ªÏú=1.45,µ±Ç°Ö¡ÊýÎª3600, ÎóÖ¡ÂÊPER=3.11111e-01,ÎóÂëÂÊBER=5.07971e-05
RaptorÂë£¬µ±Ç°¿ªÏú=1.45,µ±Ç°Ö¡ÊýÎª3600, ÎóÖ¡ÂÊPER=1.66667e-03,ÎóÂëÂÊBER=6.94444e-06
LTÂë£¬µ±Ç°¿ªÏú=1.45,µ±Ç°Ö¡ÊýÎª3700, ÎóÖ¡ÂÊPER=3.10541e-01,ÎóÂëÂÊBER=5.05366e-05
RaptorÂë£¬µ±Ç°¿ªÏú=1.45,µ±Ç°Ö¡ÊýÎª3700, ÎóÖ¡ÂÊPER=1.62162e-03,ÎóÂëÂÊBER=6.75676e-06
LTÂë£¬µ±Ç°¿ªÏú=1.45,µ±Ç°Ö¡ÊýÎª3800, ÎóÖ¡ÂÊPER=3.08947e-01,ÎóÂëÂÊBER=5.01609e-05
RaptorÂë£¬µ±Ç°¿ªÏú=1.45,µ±Ç°Ö¡ÊýÎª3800, ÎóÖ¡ÂÊPER=1.57895e-03,ÎóÂëÂÊBER=6.57895e-06
LTÂë£¬µ±Ç°¿ªÏú=1.45,µ±Ç°Ö¡ÊýÎª3900, ÎóÖ¡ÂÊPER=3.10513e-01,ÎóÂëÂÊBER=5.01814e-05
RaptorÂë£¬µ±Ç°¿ªÏú=1.45,µ±Ç°Ö¡ÊýÎª3900, ÎóÖ¡ÂÊPER=1.53846e-03,ÎóÂëÂÊBER=6.41026e-06
LTÂë£¬µ±Ç°¿ªÏú=1.45,µ±Ç°Ö¡ÊýÎª4000, ÎóÖ¡ÂÊPER=3.10000e-01,ÎóÂëÂÊBER=5.09359e-05
RaptorÂë£¬µ±Ç°¿ªÏú=1.45,µ±Ç°Ö¡ÊýÎª4000, ÎóÖ¡ÂÊPER=1.75000e-03,ÎóÂëÂÊBER=7.02500e-06
LTÂë£¬µ±Ç°¿ªÏú=1.45,µ±Ç°Ö¡ÊýÎª4100, ÎóÖ¡ÂÊPER=3.11463e-01,ÎóÂëÂÊBER=5.08887e-05
RaptorÂë£¬µ±Ç°¿ªÏú=1.45,µ±Ç°Ö¡ÊýÎª4100, ÎóÖ¡ÂÊPER=1.70732e-03,ÎóÂëÂÊBER=6.85366e-06
LTÂë£¬µ±Ç°¿ªÏú=1.45,µ±Ç°Ö¡ÊýÎª4200, ÎóÖ¡ÂÊPER=3.12381e-01,ÎóÂëÂÊBER=5.09137e-05
RaptorÂë£¬µ±Ç°¿ªÏú=1.45,µ±Ç°Ö¡ÊýÎª4200, ÎóÖ¡ÂÊPER=1.66667e-03,ÎóÂëÂÊBER=6.69048e-06
LTÂë£¬µ±Ç°¿ªÏú=1.45,µ±Ç°Ö¡ÊýÎª4300, ÎóÖ¡ÂÊPER=3.11163e-01,ÎóÂëÂÊBER=5.04134e-05
RaptorÂë£¬µ±Ç°¿ªÏú=1.45,µ±Ç°Ö¡ÊýÎª4300, ÎóÖ¡ÂÊPER=1.62791e-03,ÎóÂëÂÊBER=6.53488e-06
LTÂë£¬µ±Ç°¿ªÏú=1.45,µ±Ç°Ö¡ÊýÎª4400, ÎóÖ¡ÂÊPER=3.11364e-01,ÎóÂëÂÊBER=5.02477e-05
RaptorÂë£¬µ±Ç°¿ªÏú=1.45,µ±Ç°Ö¡ÊýÎª4400, ÎóÖ¡ÂÊPER=1.59091e-03,ÎóÂëÂÊBER=6.38636e-06
LTÂë£¬µ±Ç°¿ªÏú=1.45,µ±Ç°Ö¡ÊýÎª4500, ÎóÖ¡ÂÊPER=3.12222e-01,ÎóÂëÂÊBER=5.02853e-05
RaptorÂë£¬µ±Ç°¿ªÏú=1.45,µ±Ç°Ö¡ÊýÎª4500, ÎóÖ¡ÂÊPER=1.55556e-03,ÎóÂëÂÊBER=6.24444e-06
LTÂë£¬µ±Ç°¿ªÏú=1.45,µ±Ç°Ö¡ÊýÎª4600, ÎóÖ¡ÂÊPER=3.11957e-01,ÎóÂëÂÊBER=5.01721e-05
RaptorÂë£¬µ±Ç°¿ªÏú=1.45,µ±Ç°Ö¡ÊýÎª4600, ÎóÖ¡ÂÊPER=1.52174e-03,ÎóÂëÂÊBER=6.10870e-06
LTÂë£¬µ±Ç°¿ªÏú=1.45,µ±Ç°Ö¡ÊýÎª4700, ÎóÖ¡ÂÊPER=3.12340e-01,ÎóÂëÂÊBER=5.00013e-05
RaptorÂë£¬µ±Ç°¿ªÏú=1.45,µ±Ç°Ö¡ÊýÎª4700, ÎóÖ¡ÂÊPER=1.48936e-03,ÎóÂëÂÊBER=5.97872e-06
LTÂë£¬µ±Ç°¿ªÏú=1.45,µ±Ç°Ö¡ÊýÎª4800, ÎóÖ¡ÂÊPER=3.12708e-01,ÎóÂëÂÊBER=4.98171e-05
RaptorÂë£¬µ±Ç°¿ªÏú=1.45,µ±Ç°Ö¡ÊýÎª4800, ÎóÖ¡ÂÊPER=1.45833e-03,ÎóÂëÂÊBER=5.85417e-06
LTÂë£¬µ±Ç°¿ªÏú=1.45,µ±Ç°Ö¡ÊýÎª4900, ÎóÖ¡ÂÊPER=3.12653e-01,ÎóÂëÂÊBER=4.95404e-05
RaptorÂë£¬µ±Ç°¿ªÏú=1.45,µ±Ç°Ö¡ÊýÎª4900, ÎóÖ¡ÂÊPER=1.42857e-03,ÎóÂëÂÊBER=5.73469e-06
LTÂë£¬µ±Ç°¿ªÏú=1.45,µ±Ç°Ö¡ÊýÎª5000, ÎóÖ¡ÂÊPER=3.11200e-01,ÎóÂëÂÊBER=4.90788e-05
RaptorÂë£¬µ±Ç°¿ªÏú=1.45,µ±Ç°Ö¡ÊýÎª5000, ÎóÖ¡ÂÊPER=1.40000e-03,ÎóÂëÂÊBER=5.62000e-06
µ±Ç°ÐÅµÀ±ê×¼²î=100.00,¿ªÏú=1.45,µ±Ç°Ö¡ÊýÎª5000, LTÂëÎóÂëÂÊBER_LT=4.90788e-05,RaptorÎóÂëÂÊBER=5.62000e-06
RaptorÎóÂëÂÊ´ïµ½ÒªÇó£¬²»ÔÙÔö¼ÓÐÅÔë±È
ÐÅµÀ±ê×¼²î·¶Î§Îª£º
Inf  
¿ªÏú·¶Î§Îª£º
1.45  1.50  1.55  1.60  1.65  1.70  1.75  1.80  
LTÎóÂëÂÊBER_LTÎª£º
4.90788e-05  0.00000e+00  0.00000e+00  0.00000e+00  0.00000e+00  0.00000e+00  0.00000e+00  0.00000e+00  
RaptorÎóÂëÂÊBERÎª£º
5.62000e-06  0.00000e+00  0.00000e+00  0.00000e+00  0.00000e+00  0.00000e+00  0.00000e+00  0.00000e+00  
Ê±¼äÒÑ¹ý 185509.739440 Ãë¡£
