# Supplementary material for: An Efficient Design of Systematic Rateless Codes
Source: Hindawi journal article supplement (doi:10.1155/2020/8068414), 2020-05-19
Supplement: f1 [file 8068414.f1.zip › supplementary files/Matlab_code_for_Figure1/BER_by_Simulation/实际码字结果/AWGN_dist2018033_K10000_S.txt]

20190612²âÊÔËõÐ¡ÄÚÂëÊä³öLLRÐ§¹û£¬ÇÒËõ¼õÒò×ÓÎª

zoom_in =

     1


rho =

     0


sigma_n_2 =

   1.682987290000000


sigma_vec =

   Inf


dist_num =

     2.018033000000000e+03

µ±Ç°ÐÅµÀÎªPBIÐÅµÀ
K =

       10000


out_node_index =

     1     2     5     6    30    50


out_node_degree =

  Columns 1 through 9

   0.015270000000000   0.144920000000000                   0                   0   0.594060000000000   0.140580000000000                   0                   0                   0

  Columns 10 through 18

                   0                   0                   0                   0                   0                   0                   0                   0                   0

  Columns 19 through 27

                   0                   0                   0                   0                   0                   0                   0                   0                   0

  Columns 28 through 36

                   0                   0   0.077430000000000                   0                   0                   0                   0                   0                   0

  Columns 37 through 45

                   0                   0                   0                   0                   0                   0                   0                   0                   0

  Columns 46 through 50

                   0                   0                   0                   0   0.027750000000000

ÕýÔÚ¶ÔÍâÂë½øÐÐÏßÐÔPEG±àÂë£¬ÇëÉÔµÈ...
µ±Ç°Ñ¡ÔñµÄÊÇÏµÍ³Âë
´íÎó±ÈÌØÊýºÍÖ¡Êý¶¼´ïµ½Ò»¶¨Á¿£¬ÐèÒªÔö¼Ó¿ªÏú
µ±Ç°ÐÅµÀ±ê×¼²î=100.00,¿ªÏú=2.00,µ±Ç°Ö¡ÊýÎª20, LTÂëÎóÂëÂÊBER_LT=1.52470e-01,RaptorÎóÂëÂÊBER=1.52490e-01
´íÎó±ÈÌØÊýºÍÖ¡Êý¶¼´ïµ½Ò»¶¨Á¿£¬ÐèÒªÔö¼Ó¿ªÏú
µ±Ç°ÐÅµÀ±ê×¼²î=100.00,¿ªÏú=2.10,µ±Ç°Ö¡ÊýÎª20, LTÂëÎóÂëÂÊBER_LT=1.26367e-01,RaptorÎóÂëÂÊBER=1.26290e-01
´íÎó±ÈÌØÊýºÍÖ¡Êý¶¼´ïµ½Ò»¶¨Á¿£¬ÐèÒªÔö¼Ó¿ªÏú
µ±Ç°ÐÅµÀ±ê×¼²î=100.00,¿ªÏú=2.20,µ±Ç°Ö¡ÊýÎª26, LTÂëÎóÂëÂÊBER_LT=7.29540e-02,RaptorÎóÂëÂÊBER=7.23500e-02
LTÂë£¬µ±Ç°¿ªÏú=2.30,µ±Ç°Ö¡ÊýÎª50, ÎóÖ¡ÂÊPER=1.00000e+00,ÎóÂëÂÊBER=9.17091e-03
RaptorÂë£¬µ±Ç°¿ªÏú=2.30,µ±Ç°Ö¡ÊýÎª50, ÎóÖ¡ÂÊPER=1.00000e-01,ÎóÂëÂÊBER=7.72600e-03
LTÂë£¬µ±Ç°¿ªÏú=2.30,µ±Ç°Ö¡ÊýÎª100, ÎóÖ¡ÂÊPER=1.00000e+00,ÎóÂëÂÊBER=9.63936e-03
RaptorÂë£¬µ±Ç°¿ªÏú=2.30,µ±Ç°Ö¡ÊýÎª100, ÎóÖ¡ÂÊPER=1.20000e-01,ÎóÂëÂÊBER=8.23500e-03
LTÂë£¬µ±Ç°¿ªÏú=2.30,µ±Ç°Ö¡ÊýÎª150, ÎóÖ¡ÂÊPER=1.00000e+00,ÎóÂëÂÊBER=8.77499e-03
RaptorÂë£¬µ±Ç°¿ªÏú=2.30,µ±Ç°Ö¡ÊýÎª150, ÎóÖ¡ÂÊPER=1.06667e-01,ÎóÂëÂÊBER=7.36333e-03
LTÂë£¬µ±Ç°¿ªÏú=2.30,µ±Ç°Ö¡ÊýÎª200, ÎóÖ¡ÂÊPER=1.00000e+00,ÎóÂëÂÊBER=7.39906e-03
RaptorÂë£¬µ±Ç°¿ªÏú=2.30,µ±Ç°Ö¡ÊýÎª200, ÎóÖ¡ÂÊPER=9.50000e-02,ÎóÂëÂÊBER=5.98100e-03
´íÎó±ÈÌØÊýºÍÖ¡Êý¶¼´ïµ½Ò»¶¨Á¿£¬ÐèÒªÔö¼Ó¿ªÏú
µ±Ç°ÐÅµÀ±ê×¼²î=100.00,¿ªÏú=2.30,µ±Ç°Ö¡ÊýÎª230, LTÂëÎóÂëÂÊBER_LT=7.25035e-03,RaptorÎóÂëÂÊBER=5.81565e-03
LTÂë£¬µ±Ç°¿ªÏú=2.40,µ±Ç°Ö¡ÊýÎª50, ÎóÖ¡ÂÊPER=1.00000e+00,ÎóÂëÂÊBER=1.00549e-03
RaptorÂë£¬µ±Ç°¿ªÏú=2.40,µ±Ç°Ö¡ÊýÎª50, ÎóÖ¡ÂÊPER=0.00000e+00,ÎóÂëÂÊBER=0.00000e+00
LTÂë£¬µ±Ç°¿ªÏú=2.40,µ±Ç°Ö¡ÊýÎª100, ÎóÖ¡ÂÊPER=1.00000e+00,ÎóÂëÂÊBER=1.03195e-03
RaptorÂë£¬µ±Ç°¿ªÏú=2.40,µ±Ç°Ö¡ÊýÎª100, ÎóÖ¡ÂÊPER=0.00000e+00,ÎóÂëÂÊBER=0.00000e+00
LTÂë£¬µ±Ç°¿ªÏú=2.40,µ±Ç°Ö¡ÊýÎª150, ÎóÖ¡ÂÊPER=1.00000e+00,ÎóÂëÂÊBER=1.03097e-03
RaptorÂë£¬µ±Ç°¿ªÏú=2.40,µ±Ç°Ö¡ÊýÎª150, ÎóÖ¡ÂÊPER=0.00000e+00,ÎóÂëÂÊBER=0.00000e+00
LTÂë£¬µ±Ç°¿ªÏú=2.40,µ±Ç°Ö¡ÊýÎª200, ÎóÖ¡ÂÊPER=1.00000e+00,ÎóÂëÂÊBER=1.07654e-03
RaptorÂë£¬µ±Ç°¿ªÏú=2.40,µ±Ç°Ö¡ÊýÎª200, ÎóÖ¡ÂÊPER=0.00000e+00,ÎóÂëÂÊBER=0.00000e+00
LTÂë£¬µ±Ç°¿ªÏú=2.40,µ±Ç°Ö¡ÊýÎª250, ÎóÖ¡ÂÊPER=1.00000e+00,ÎóÂëÂÊBER=1.68483e-03
RaptorÂë£¬µ±Ç°¿ªÏú=2.40,µ±Ç°Ö¡ÊýÎª250, ÎóÖ¡ÂÊPER=4.00000e-03,ÎóÂëÂÊBER=6.12000e-04
LTÂë£¬µ±Ç°¿ªÏú=2.40,µ±Ç°Ö¡ÊýÎª300, ÎóÖ¡ÂÊPER=1.00000e+00,ÎóÂëÂÊBER=1.57651e-03
RaptorÂë£¬µ±Ç°¿ªÏú=2.40,µ±Ç°Ö¡ÊýÎª300, ÎóÖ¡ÂÊPER=3.33333e-03,ÎóÂëÂÊBER=5.10000e-04
LTÂë£¬µ±Ç°¿ªÏú=2.40,µ±Ç°Ö¡ÊýÎª350, ÎóÖ¡ÂÊPER=1.00000e+00,ÎóÂëÂÊBER=1.51145e-03
RaptorÂë£¬µ±Ç°¿ªÏú=2.40,µ±Ç°Ö¡ÊýÎª350, ÎóÖ¡ÂÊPER=2.85714e-03,ÎóÂëÂÊBER=4.37143e-04
LTÂë£¬µ±Ç°¿ªÏú=2.40,µ±Ç°Ö¡ÊýÎª400, ÎóÖ¡ÂÊPER=1.00000e+00,ÎóÂëÂÊBER=1.47859e-03
RaptorÂë£¬µ±Ç°¿ªÏú=2.40,µ±Ç°Ö¡ÊýÎª400, ÎóÖ¡ÂÊPER=2.50000e-03,ÎóÂëÂÊBER=3.82500e-04
LTÂë£¬µ±Ç°¿ªÏú=2.40,µ±Ç°Ö¡ÊýÎª450, ÎóÖ¡ÂÊPER=1.00000e+00,ÎóÂëÂÊBER=1.42602e-03
RaptorÂë£¬µ±Ç°¿ªÏú=2.40,µ±Ç°Ö¡ÊýÎª450, ÎóÖ¡ÂÊPER=2.22222e-03,ÎóÂëÂÊBER=3.40000e-04
LTÂë£¬µ±Ç°¿ªÏú=2.40,µ±Ç°Ö¡ÊýÎª500, ÎóÖ¡ÂÊPER=1.00000e+00,ÎóÂëÂÊBER=1.42199e-03
RaptorÂë£¬µ±Ç°¿ªÏú=2.40,µ±Ç°Ö¡ÊýÎª500, ÎóÖ¡ÂÊPER=4.00000e-03,ÎóÂëÂÊBER=3.41400e-04
µ±Ç°ÐÅµÀ±ê×¼²î=100.00,¿ªÏú=2.40,µ±Ç°Ö¡ÊýÎª500, LTÂëÎóÂëÂÊBER_LT=1.42199e-03,RaptorÎóÂëÂÊBER=3.41400e-04
LTÂë£¬µ±Ç°¿ªÏú=2.50,µ±Ç°Ö¡ÊýÎª50, ÎóÖ¡ÂÊPER=1.00000e+00,ÎóÂëÂÊBER=6.68365e-04
RaptorÂë£¬µ±Ç°¿ªÏú=2.50,µ±Ç°Ö¡ÊýÎª50, ÎóÖ¡ÂÊPER=0.00000e+00,ÎóÂëÂÊBER=0.00000e+00
{²Ù×÷ÔÚÒÔÏÂ¹ý³ÌÖÐ±»ÓÃ»§ÖÕÖ¹ <a href="matlab:helpUtils.errorDocCallback('sys_LT_Log_SP_decode', 'D:\ËÑ¹·¸ßËÙÏÂÔØ\³ÌÐò0805\Copy_of_Êµ¼ÊÂë×ÖÐÔÄÜ·ÂÕæ\sys_LT_Log_SP_decode.m', 50)" style="font-weight:bold">sys_LT_Log_SP_decode</a> (<a href="matlab: opentoline('D:\ËÑ¹·¸ßËÙÏÂÔØ\³ÌÐò0805\Copy_of_Êµ¼ÊÂë×ÖÐÔÄÜ·ÂÕæ\sys_LT_Log_SP_decode.m',50,0)">line 50</a>)


Î»ÖÃ <a href="matlab:helpUtils.errorDocCallback('Main_Raptor_enc_dec', 'D:\ËÑ¹·¸ßËÙÏÂÔØ\³ÌÐò0805\Copy_of_Êµ¼ÊÂë×ÖÐÔÄÜ·ÂÕæ\Main_Raptor_enc_dec.m', 220)" style="font-weight:bold">Main_Raptor_enc_dec</a> (<a href="matlab: opentoline('D:\ËÑ¹·¸ßËÙÏÂÔØ\³ÌÐò0805\Copy_of_Êµ¼ÊÂë×ÖÐÔÄÜ·ÂÕæ\Main_Raptor_enc_dec.m',220,0)">line 220</a>)
            [d_code,success_LT,soft_LT_msg,k] = sys_LT_Log_SP_decode(L_rate,H,iter_num_LT);
} 
diary off
