# Supplementary material for: An Efficient Design of Systematic Rateless Codes
Source: Hindawi journal article supplement (doi:10.1155/2020/8068414), 2020-05-19
Supplement: f1 [file 8068414.f1.zip › supplementary files/Matlab_code_for_Figure1/BER_by_Simulation/实际码字结果/AWGN_dist2018033_K10000_S_part2.txt]

20190612²âÊÔËõÐ¡ÄÚÂëÊä³öLLRÐ§¹û£¬ÇÒËõ¼õÒò×ÓÎª

zoom_in =

     1


rho =

     0


sigma_n_2 =

   1.682987290000000


sigma_vec =

   Inf


dist_num =

     2.018033000000000e+03

µ±Ç°ÐÅµÀÎªPBIÐÅµÀ
K =

       10000


out_node_index =

     1     2     5     6    30    50


out_node_degree =

  Columns 1 through 9

   0.015270000000000   0.144920000000000                   0                   0   0.594060000000000   0.140580000000000                   0                   0                   0

  Columns 10 through 18

                   0                   0                   0                   0                   0                   0                   0                   0                   0

  Columns 19 through 27

                   0                   0                   0                   0                   0                   0                   0                   0                   0

  Columns 28 through 36

                   0                   0   0.077430000000000                   0                   0                   0                   0                   0                   0

  Columns 37 through 45

                   0                   0                   0                   0                   0                   0                   0                   0                   0

  Columns 46 through 50

                   0                   0                   0                   0   0.027750000000000

ÕýÔÚ¶ÔÍâÂë½øÐÐÏßÐÔPEG±àÂë£¬ÇëÉÔµÈ...
µ±Ç°Ñ¡ÔñµÄÊÇÏµÍ³Âë
LTÂë£¬µ±Ç°¿ªÏú=2.50,µ±Ç°Ö¡ÊýÎª200, ÎóÖ¡ÂÊPER=1.00000e+00,ÎóÂëÂÊBER=8.53587e-04
RaptorÂë£¬µ±Ç°¿ªÏú=2.50,µ±Ç°Ö¡ÊýÎª200, ÎóÖ¡ÂÊPER=0.00000e+00,ÎóÂëÂÊBER=0.00000e+00
LTÂë£¬µ±Ç°¿ªÏú=2.50,µ±Ç°Ö¡ÊýÎª400, ÎóÖ¡ÂÊPER=1.00000e+00,ÎóÂëÂÊBER=8.35457e-04
RaptorÂë£¬µ±Ç°¿ªÏú=2.50,µ±Ç°Ö¡ÊýÎª400, ÎóÖ¡ÂÊPER=0.00000e+00,ÎóÂëÂÊBER=0.00000e+00
LTÂë£¬µ±Ç°¿ªÏú=2.50,µ±Ç°Ö¡ÊýÎª600, ÎóÖ¡ÂÊPER=9.96667e-01,ÎóÂëÂÊBER=8.28270e-04
RaptorÂë£¬µ±Ç°¿ªÏú=2.50,µ±Ç°Ö¡ÊýÎª600, ÎóÖ¡ÂÊPER=0.00000e+00,ÎóÂëÂÊBER=0.00000e+00
LTÂë£¬µ±Ç°¿ªÏú=2.50,µ±Ç°Ö¡ÊýÎª800, ÎóÖ¡ÂÊPER=9.97500e-01,ÎóÂëÂÊBER=8.19042e-04
RaptorÂë£¬µ±Ç°¿ªÏú=2.50,µ±Ç°Ö¡ÊýÎª800, ÎóÖ¡ÂÊPER=0.00000e+00,ÎóÂëÂÊBER=0.00000e+00
LTÂë£¬µ±Ç°¿ªÏú=2.50,µ±Ç°Ö¡ÊýÎª1000, ÎóÖ¡ÂÊPER=9.97000e-01,ÎóÂëÂÊBER=8.22717e-04
RaptorÂë£¬µ±Ç°¿ªÏú=2.50,µ±Ç°Ö¡ÊýÎª1000, ÎóÖ¡ÂÊPER=0.00000e+00,ÎóÂëÂÊBER=0.00000e+00
LTÂë£¬µ±Ç°¿ªÏú=2.50,µ±Ç°Ö¡ÊýÎª1200, ÎóÖ¡ÂÊPER=9.96667e-01,ÎóÂëÂÊBER=8.22635e-04
RaptorÂë£¬µ±Ç°¿ªÏú=2.50,µ±Ç°Ö¡ÊýÎª1200, ÎóÖ¡ÂÊPER=0.00000e+00,ÎóÂëÂÊBER=0.00000e+00
LTÂë£¬µ±Ç°¿ªÏú=2.50,µ±Ç°Ö¡ÊýÎª1400, ÎóÖ¡ÂÊPER=9.97143e-01,ÎóÂëÂÊBER=8.21527e-04
RaptorÂë£¬µ±Ç°¿ªÏú=2.50,µ±Ç°Ö¡ÊýÎª1400, ÎóÖ¡ÂÊPER=0.00000e+00,ÎóÂëÂÊBER=0.00000e+00
LTÂë£¬µ±Ç°¿ªÏú=2.50,µ±Ç°Ö¡ÊýÎª1600, ÎóÖ¡ÂÊPER=9.97500e-01,ÎóÂëÂÊBER=8.18735e-04
RaptorÂë£¬µ±Ç°¿ªÏú=2.50,µ±Ç°Ö¡ÊýÎª1600, ÎóÖ¡ÂÊPER=0.00000e+00,ÎóÂëÂÊBER=0.00000e+00
LTÂë£¬µ±Ç°¿ªÏú=2.50,µ±Ç°Ö¡ÊýÎª1800, ÎóÖ¡ÂÊPER=9.97222e-01,ÎóÂëÂÊBER=8.14550e-04
RaptorÂë£¬µ±Ç°¿ªÏú=2.50,µ±Ç°Ö¡ÊýÎª1800, ÎóÖ¡ÂÊPER=0.00000e+00,ÎóÂëÂÊBER=0.00000e+00
LTÂë£¬µ±Ç°¿ªÏú=2.50,µ±Ç°Ö¡ÊýÎª2000, ÎóÖ¡ÂÊPER=9.97500e-01,ÎóÂëÂÊBER=8.14681e-04
RaptorÂë£¬µ±Ç°¿ªÏú=2.50,µ±Ç°Ö¡ÊýÎª2000, ÎóÖ¡ÂÊPER=0.00000e+00,ÎóÂëÂÊBER=0.00000e+00
µ±Ç°ÐÅµÀ±ê×¼²î=100.00,¿ªÏú=2.50,µ±Ç°Ö¡ÊýÎª2000, LTÂëÎóÂëÂÊBER_LT=8.14681e-04,RaptorÎóÂëÂÊBER=0.00000e+00
LTÂë£¬µ±Ç°¿ªÏú=2.60,µ±Ç°Ö¡ÊýÎª200, ÎóÖ¡ÂÊPER=9.95000e-01,ÎóÂëÂÊBER=5.49294e-04
RaptorÂë£¬µ±Ç°¿ªÏú=2.60,µ±Ç°Ö¡ÊýÎª200, ÎóÖ¡ÂÊPER=0.00000e+00,ÎóÂëÂÊBER=0.00000e+00
{²Ù×÷ÔÚÒÔÏÂ¹ý³ÌÖÐ±»ÓÃ»§ÖÕÖ¹ <a href="matlab:helpUtils.errorDocCallback('sys_LT_Log_SP_decode', 'D:\ËÑ¹·¸ßËÙÏÂÔØ\³ÌÐò0805\Copy_of_Êµ¼ÊÂë×ÖÐÔÄÜ·ÂÕæ\sys_LT_Log_SP_decode.m', 50)" style="font-weight:bold">sys_LT_Log_SP_decode</a> (<a href="matlab: opentoline('D:\ËÑ¹·¸ßËÙÏÂÔØ\³ÌÐò0805\Copy_of_Êµ¼ÊÂë×ÖÐÔÄÜ·ÂÕæ\sys_LT_Log_SP_decode.m',50,0)">line 50</a>)


Î»ÖÃ <a href="matlab:helpUtils.errorDocCallback('Main_Raptor_enc_dec', 'D:\ËÑ¹·¸ßËÙÏÂÔØ\³ÌÐò0805\Copy_of_Êµ¼ÊÂë×ÖÐÔÄÜ·ÂÕæ\Main_Raptor_enc_dec.m', 220)" style="font-weight:bold">Main_Raptor_enc_dec</a> (<a href="matlab: opentoline('D:\ËÑ¹·¸ßËÙÏÂÔØ\³ÌÐò0805\Copy_of_Êµ¼ÊÂë×ÖÐÔÄÜ·ÂÕæ\Main_Raptor_enc_dec.m',220,0)">line 220</a>)
            [d_code,success_LT,soft_LT_msg,k] = sys_LT_Log_SP_decode(L_rate,H,iter_num_LT);
} 
toc;diary off
Ê±¼äÒÑ¹ý 254057.693627 Ãë¡£
