# Supplementary material for: An Efficient Design of Systematic Rateless Codes
Source: Hindawi journal article supplement (doi:10.1155/2020/8068414), 2020-05-19
Supplement: f1 [file 8068414.f1.zip › supplementary files/Matlab_code_for_Figure1/BER_by_Simulation/实际码字结果/AWGN_dist2018033_K10000_S_part3.txt]

20190612²âÊÔËõÐ¡ÄÚÂëÊä³öLLRÐ§¹û£¬ÇÒËõ¼õÒò×ÓÎª

zoom_in =

     1


rho =

     0


sigma_n_2 =

   1.682987290000000


sigma_vec =

   Inf


dist_num =

     2.018033000000000e+03

µ±Ç°ÐÅµÀÎªPBIÐÅµÀ
K =

       10000


out_node_degree =

  1 ÖÁ 5 ÁÐ

   0.015270000000000   0.144920000000000                   0                   0   0.594060000000000

  6 ÖÁ 10 ÁÐ

   0.140580000000000                   0                   0                   0                   0

  11 ÖÁ 15 ÁÐ

                   0                   0                   0                   0                   0

  16 ÖÁ 20 ÁÐ

                   0                   0                   0                   0                   0

  21 ÖÁ 25 ÁÐ

                   0                   0                   0                   0                   0

  26 ÖÁ 30 ÁÐ

                   0                   0                   0                   0   0.077430000000000

  31 ÖÁ 35 ÁÐ

                   0                   0                   0                   0                   0

  36 ÖÁ 40 ÁÐ

                   0                   0                   0                   0                   0

  41 ÖÁ 45 ÁÐ

                   0                   0                   0                   0                   0

  46 ÖÁ 50 ÁÐ

                   0                   0                   0                   0   0.027750000000000

ÕýÔÚ¶ÔÍâÂë½øÐÐÏßÐÔPEG±àÂë£¬ÇëÉÔµÈ...
µ±Ç°Ñ¡ÔñµÄÊÇÏµÍ³Âë
LTÂë£¬µ±Ç°¿ªÏú=2.45,µ±Ç°Ö¡ÊýÎª50, ÎóÖ¡ÂÊPER=1.00000e+00,ÎóÂëÂÊBER=8.62407e-04
RaptorÂë£¬µ±Ç°¿ªÏú=2.45,µ±Ç°Ö¡ÊýÎª50, ÎóÖ¡ÂÊPER=0.00000e+00,ÎóÂëÂÊBER=0.00000e+00
LTÂë£¬µ±Ç°¿ªÏú=2.45,µ±Ç°Ö¡ÊýÎª100, ÎóÖ¡ÂÊPER=1.00000e+00,ÎóÂëÂÊBER=8.80047e-04
RaptorÂë£¬µ±Ç°¿ªÏú=2.45,µ±Ç°Ö¡ÊýÎª100, ÎóÖ¡ÂÊPER=0.00000e+00,ÎóÂëÂÊBER=0.00000e+00
LTÂë£¬µ±Ç°¿ªÏú=2.45,µ±Ç°Ö¡ÊýÎª150, ÎóÖ¡ÂÊPER=1.00000e+00,ÎóÂëÂÊBER=8.83967e-04
RaptorÂë£¬µ±Ç°¿ªÏú=2.45,µ±Ç°Ö¡ÊýÎª150, ÎóÖ¡ÂÊPER=0.00000e+00,ÎóÂëÂÊBER=0.00000e+00
LTÂë£¬µ±Ç°¿ªÏú=2.45,µ±Ç°Ö¡ÊýÎª200, ÎóÖ¡ÂÊPER=1.00000e+00,ÎóÂëÂÊBER=1.22844e-03
RaptorÂë£¬µ±Ç°¿ªÏú=2.45,µ±Ç°Ö¡ÊýÎª200, ÎóÖ¡ÂÊPER=5.00000e-03,ÎóÂëÂÊBER=3.41500e-04
LTÂë£¬µ±Ç°¿ªÏú=2.45,µ±Ç°Ö¡ÊýÎª250, ÎóÖ¡ÂÊPER=1.00000e+00,ÎóÂëÂÊBER=1.14230e-03
RaptorÂë£¬µ±Ç°¿ªÏú=2.45,µ±Ç°Ö¡ÊýÎª250, ÎóÖ¡ÂÊPER=4.00000e-03,ÎóÂëÂÊBER=2.73200e-04
LTÂë£¬µ±Ç°¿ªÏú=2.45,µ±Ç°Ö¡ÊýÎª300, ÎóÖ¡ÂÊPER=1.00000e+00,ÎóÂëÂÊBER=1.11558e-03
RaptorÂë£¬µ±Ç°¿ªÏú=2.45,µ±Ç°Ö¡ÊýÎª300, ÎóÖ¡ÂÊPER=3.33333e-03,ÎóÂëÂÊBER=2.27667e-04
LTÂë£¬µ±Ç°¿ªÏú=2.45,µ±Ç°Ö¡ÊýÎª350, ÎóÖ¡ÂÊPER=1.00000e+00,ÎóÂëÂÊBER=1.09509e-03
RaptorÂë£¬µ±Ç°¿ªÏú=2.45,µ±Ç°Ö¡ÊýÎª350, ÎóÖ¡ÂÊPER=2.85714e-03,ÎóÂëÂÊBER=1.95143e-04
LTÂë£¬µ±Ç°¿ªÏú=2.45,µ±Ç°Ö¡ÊýÎª400, ÎóÖ¡ÂÊPER=1.00000e+00,ÎóÂëÂÊBER=1.06551e-03
RaptorÂë£¬µ±Ç°¿ªÏú=2.45,µ±Ç°Ö¡ÊýÎª400, ÎóÖ¡ÂÊPER=2.50000e-03,ÎóÂëÂÊBER=1.70750e-04
LTÂë£¬µ±Ç°¿ªÏú=2.45,µ±Ç°Ö¡ÊýÎª450, ÎóÖ¡ÂÊPER=1.00000e+00,ÎóÂëÂÊBER=1.05732e-03
RaptorÂë£¬µ±Ç°¿ªÏú=2.45,µ±Ç°Ö¡ÊýÎª450, ÎóÖ¡ÂÊPER=2.22222e-03,ÎóÂëÂÊBER=1.51778e-04
LTÂë£¬µ±Ç°¿ªÏú=2.45,µ±Ç°Ö¡ÊýÎª500, ÎóÖ¡ÂÊPER=1.00000e+00,ÎóÂëÂÊBER=1.04194e-03
RaptorÂë£¬µ±Ç°¿ªÏú=2.45,µ±Ç°Ö¡ÊýÎª500, ÎóÖ¡ÂÊPER=2.00000e-03,ÎóÂëÂÊBER=1.36600e-04
LTÂë£¬µ±Ç°¿ªÏú=2.45,µ±Ç°Ö¡ÊýÎª550, ÎóÖ¡ÂÊPER=1.00000e+00,ÎóÂëÂÊBER=1.03026e-03
RaptorÂë£¬µ±Ç°¿ªÏú=2.45,µ±Ç°Ö¡ÊýÎª550, ÎóÖ¡ÂÊPER=1.81818e-03,ÎóÂëÂÊBER=1.24182e-04
LTÂë£¬µ±Ç°¿ªÏú=2.45,µ±Ç°Ö¡ÊýÎª600, ÎóÖ¡ÂÊPER=1.00000e+00,ÎóÂëÂÊBER=1.01496e-03
RaptorÂë£¬µ±Ç°¿ªÏú=2.45,µ±Ç°Ö¡ÊýÎª600, ÎóÖ¡ÂÊPER=1.66667e-03,ÎóÂëÂÊBER=1.13833e-04
LTÂë£¬µ±Ç°¿ªÏú=2.45,µ±Ç°Ö¡ÊýÎª650, ÎóÖ¡ÂÊPER=1.00000e+00,ÎóÂëÂÊBER=1.01077e-03
RaptorÂë£¬µ±Ç°¿ªÏú=2.45,µ±Ç°Ö¡ÊýÎª650, ÎóÖ¡ÂÊPER=1.53846e-03,ÎóÂëÂÊBER=1.05077e-04
LTÂë£¬µ±Ç°¿ªÏú=2.45,µ±Ç°Ö¡ÊýÎª700, ÎóÖ¡ÂÊPER=1.00000e+00,ÎóÂëÂÊBER=9.96388e-04
RaptorÂë£¬µ±Ç°¿ªÏú=2.45,µ±Ç°Ö¡ÊýÎª700, ÎóÖ¡ÂÊPER=1.42857e-03,ÎóÂëÂÊBER=9.75714e-05
LTÂë£¬µ±Ç°¿ªÏú=2.45,µ±Ç°Ö¡ÊýÎª750, ÎóÖ¡ÂÊPER=1.00000e+00,ÎóÂëÂÊBER=9.94251e-04
RaptorÂë£¬µ±Ç°¿ªÏú=2.45,µ±Ç°Ö¡ÊýÎª750, ÎóÖ¡ÂÊPER=1.33333e-03,ÎóÂëÂÊBER=9.10667e-05
LTÂë£¬µ±Ç°¿ªÏú=2.45,µ±Ç°Ö¡ÊýÎª800, ÎóÖ¡ÂÊPER=1.00000e+00,ÎóÂëÂÊBER=9.83315e-04
RaptorÂë£¬µ±Ç°¿ªÏú=2.45,µ±Ç°Ö¡ÊýÎª800, ÎóÖ¡ÂÊPER=1.25000e-03,ÎóÂëÂÊBER=8.53750e-05
LTÂë£¬µ±Ç°¿ªÏú=2.45,µ±Ç°Ö¡ÊýÎª850, ÎóÖ¡ÂÊPER=1.00000e+00,ÎóÂëÂÊBER=9.81737e-04
RaptorÂë£¬µ±Ç°¿ªÏú=2.45,µ±Ç°Ö¡ÊýÎª850, ÎóÖ¡ÂÊPER=1.17647e-03,ÎóÂëÂÊBER=8.03529e-05
LTÂë£¬µ±Ç°¿ªÏú=2.45,µ±Ç°Ö¡ÊýÎª900, ÎóÖ¡ÂÊPER=1.00000e+00,ÎóÂëÂÊBER=9.80117e-04
RaptorÂë£¬µ±Ç°¿ªÏú=2.45,µ±Ç°Ö¡ÊýÎª900, ÎóÖ¡ÂÊPER=1.11111e-03,ÎóÂëÂÊBER=7.58889e-05
LTÂë£¬µ±Ç°¿ªÏú=2.45,µ±Ç°Ö¡ÊýÎª950, ÎóÖ¡ÂÊPER=1.00000e+00,ÎóÂëÂÊBER=9.76397e-04
RaptorÂë£¬µ±Ç°¿ªÏú=2.45,µ±Ç°Ö¡ÊýÎª950, ÎóÖ¡ÂÊPER=1.05263e-03,ÎóÂëÂÊBER=7.18947e-05
LTÂë£¬µ±Ç°¿ªÏú=2.45,µ±Ç°Ö¡ÊýÎª1000, ÎóÖ¡ÂÊPER=1.00000e+00,ÎóÂëÂÊBER=9.72560e-04
RaptorÂë£¬µ±Ç°¿ªÏú=2.45,µ±Ç°Ö¡ÊýÎª1000, ÎóÖ¡ÂÊPER=1.00000e-03,ÎóÂëÂÊBER=6.83000e-05
µ±Ç°ÐÅµÀ±ê×¼²î=100.00,¿ªÏú=2.45,µ±Ç°Ö¡ÊýÎª1000, LTÂëÎóÂëÂÊBER_LT=9.72560e-04,RaptorÎóÂëÂÊBER=6.83000e-05
LTÂë£¬µ±Ç°¿ªÏú=2.50,µ±Ç°Ö¡ÊýÎª50, ÎóÖ¡ÂÊPER=9.80000e-01,ÎóÂëÂÊBER=7.46766e-04
RaptorÂë£¬µ±Ç°¿ªÏú=2.50,µ±Ç°Ö¡ÊýÎª50, ÎóÖ¡ÂÊPER=0.00000e+00,ÎóÂëÂÊBER=0.00000e+00
LTÂë£¬µ±Ç°¿ªÏú=2.50,µ±Ç°Ö¡ÊýÎª100, ÎóÖ¡ÂÊPER=9.70000e-01,ÎóÂëÂÊBER=7.84006e-04
RaptorÂë£¬µ±Ç°¿ªÏú=2.50,µ±Ç°Ö¡ÊýÎª100, ÎóÖ¡ÂÊPER=0.00000e+00,ÎóÂëÂÊBER=0.00000e+00
LTÂë£¬µ±Ç°¿ªÏú=2.50,µ±Ç°Ö¡ÊýÎª150, ÎóÖ¡ÂÊPER=9.80000e-01,ÎóÂëÂÊBER=7.97073e-04
RaptorÂë£¬µ±Ç°¿ªÏú=2.50,µ±Ç°Ö¡ÊýÎª150, ÎóÖ¡ÂÊPER=0.00000e+00,ÎóÂëÂÊBER=0.00000e+00
LTÂë£¬µ±Ç°¿ªÏú=2.50,µ±Ç°Ö¡ÊýÎª200, ÎóÖ¡ÂÊPER=9.85000e-01,ÎóÂëÂÊBER=8.05076e-04
RaptorÂë£¬µ±Ç°¿ªÏú=2.50,µ±Ç°Ö¡ÊýÎª200, ÎóÖ¡ÂÊPER=0.00000e+00,ÎóÂëÂÊBER=0.00000e+00
LTÂë£¬µ±Ç°¿ªÏú=2.50,µ±Ç°Ö¡ÊýÎª250, ÎóÖ¡ÂÊPER=9.88000e-01,ÎóÂëÂÊBER=7.98510e-04
RaptorÂë£¬µ±Ç°¿ªÏú=2.50,µ±Ç°Ö¡ÊýÎª250, ÎóÖ¡ÂÊPER=0.00000e+00,ÎóÂëÂÊBER=0.00000e+00
LTÂë£¬µ±Ç°¿ªÏú=2.50,µ±Ç°Ö¡ÊýÎª300, ÎóÖ¡ÂÊPER=9.90000e-01,ÎóÂëÂÊBER=8.01320e-04
RaptorÂë£¬µ±Ç°¿ªÏú=2.50,µ±Ç°Ö¡ÊýÎª300, ÎóÖ¡ÂÊPER=0.00000e+00,ÎóÂëÂÊBER=0.00000e+00
LTÂë£¬µ±Ç°¿ªÏú=2.50,µ±Ç°Ö¡ÊýÎª350, ÎóÖ¡ÂÊPER=9.91429e-01,ÎóÂëÂÊBER=7.95206e-04
RaptorÂë£¬µ±Ç°¿ªÏú=2.50,µ±Ç°Ö¡ÊýÎª350, ÎóÖ¡ÂÊPER=0.00000e+00,ÎóÂëÂÊBER=0.00000e+00
LTÂë£¬µ±Ç°¿ªÏú=2.50,µ±Ç°Ö¡ÊýÎª400, ÎóÖ¡ÂÊPER=9.92500e-01,ÎóÂëÂÊBER=7.89641e-04
RaptorÂë£¬µ±Ç°¿ªÏú=2.50,µ±Ç°Ö¡ÊýÎª400, ÎóÖ¡ÂÊPER=0.00000e+00,ÎóÂëÂÊBER=0.00000e+00
LTÂë£¬µ±Ç°¿ªÏú=2.50,µ±Ç°Ö¡ÊýÎª450, ÎóÖ¡ÂÊPER=9.93333e-01,ÎóÂëÂÊBER=7.87709e-04
RaptorÂë£¬µ±Ç°¿ªÏú=2.50,µ±Ç°Ö¡ÊýÎª450, ÎóÖ¡ÂÊPER=0.00000e+00,ÎóÂëÂÊBER=0.00000e+00
LTÂë£¬µ±Ç°¿ªÏú=2.50,µ±Ç°Ö¡ÊýÎª500, ÎóÖ¡ÂÊPER=9.94000e-01,ÎóÂëÂÊBER=7.85182e-04
RaptorÂë£¬µ±Ç°¿ªÏú=2.50,µ±Ç°Ö¡ÊýÎª500, ÎóÖ¡ÂÊPER=0.00000e+00,ÎóÂëÂÊBER=0.00000e+00
LTÂë£¬µ±Ç°¿ªÏú=2.50,µ±Ç°Ö¡ÊýÎª550, ÎóÖ¡ÂÊPER=9.94545e-01,ÎóÂëÂÊBER=7.85610e-04
RaptorÂë£¬µ±Ç°¿ªÏú=2.50,µ±Ç°Ö¡ÊýÎª550, ÎóÖ¡ÂÊPER=0.00000e+00,ÎóÂëÂÊBER=0.00000e+00
LTÂë£¬µ±Ç°¿ªÏú=2.50,µ±Ç°Ö¡ÊýÎª600, ÎóÖ¡ÂÊPER=9.95000e-01,ÎóÂëÂÊBER=7.94296e-04
RaptorÂë£¬µ±Ç°¿ªÏú=2.50,µ±Ç°Ö¡ÊýÎª600, ÎóÖ¡ÂÊPER=0.00000e+00,ÎóÂëÂÊBER=0.00000e+00
LTÂë£¬µ±Ç°¿ªÏú=2.50,µ±Ç°Ö¡ÊýÎª650, ÎóÖ¡ÂÊPER=9.95385e-01,ÎóÂëÂÊBER=7.88982e-04
RaptorÂë£¬µ±Ç°¿ªÏú=2.50,µ±Ç°Ö¡ÊýÎª650, ÎóÖ¡ÂÊPER=0.00000e+00,ÎóÂëÂÊBER=0.00000e+00
LTÂë£¬µ±Ç°¿ªÏú=2.50,µ±Ç°Ö¡ÊýÎª700, ÎóÖ¡ÂÊPER=9.95714e-01,ÎóÂëÂÊBER=7.97306e-04
RaptorÂë£¬µ±Ç°¿ªÏú=2.50,µ±Ç°Ö¡ÊýÎª700, ÎóÖ¡ÂÊPER=0.00000e+00,ÎóÂëÂÊBER=0.00000e+00
LTÂë£¬µ±Ç°¿ªÏú=2.50,µ±Ç°Ö¡ÊýÎª750, ÎóÖ¡ÂÊPER=9.96000e-01,ÎóÂëÂÊBER=7.95636e-04
RaptorÂë£¬µ±Ç°¿ªÏú=2.50,µ±Ç°Ö¡ÊýÎª750, ÎóÖ¡ÂÊPER=0.00000e+00,ÎóÂëÂÊBER=0.00000e+00
LTÂë£¬µ±Ç°¿ªÏú=2.50,µ±Ç°Ö¡ÊýÎª800, ÎóÖ¡ÂÊPER=9.96250e-01,ÎóÂëÂÊBER=7.93194e-04
RaptorÂë£¬µ±Ç°¿ªÏú=2.50,µ±Ç°Ö¡ÊýÎª800, ÎóÖ¡ÂÊPER=0.00000e+00,ÎóÂëÂÊBER=0.00000e+00
LTÂë£¬µ±Ç°¿ªÏú=2.50,µ±Ç°Ö¡ÊýÎª850, ÎóÖ¡ÂÊPER=9.96471e-01,ÎóÂëÂÊBER=7.91616e-04
RaptorÂë£¬µ±Ç°¿ªÏú=2.50,µ±Ç°Ö¡ÊýÎª850, ÎóÖ¡ÂÊPER=0.00000e+00,ÎóÂëÂÊBER=0.00000e+00
LTÂë£¬µ±Ç°¿ªÏú=2.50,µ±Ç°Ö¡ÊýÎª900, ÎóÖ¡ÂÊPER=9.96667e-01,ÎóÂëÂÊBER=7.93044e-04
RaptorÂë£¬µ±Ç°¿ªÏú=2.50,µ±Ç°Ö¡ÊýÎª900, ÎóÖ¡ÂÊPER=0.00000e+00,ÎóÂëÂÊBER=0.00000e+00
LTÂë£¬µ±Ç°¿ªÏú=2.50,µ±Ç°Ö¡ÊýÎª950, ÎóÖ¡ÂÊPER=9.96842e-01,ÎóÂëÂÊBER=7.91021e-04
RaptorÂë£¬µ±Ç°¿ªÏú=2.50,µ±Ç°Ö¡ÊýÎª950, ÎóÖ¡ÂÊPER=0.00000e+00,ÎóÂëÂÊBER=0.00000e+00
LTÂë£¬µ±Ç°¿ªÏú=2.50,µ±Ç°Ö¡ÊýÎª1000, ÎóÖ¡ÂÊPER=9.97000e-01,ÎóÂëÂÊBER=7.95570e-04
RaptorÂë£¬µ±Ç°¿ªÏú=2.50,µ±Ç°Ö¡ÊýÎª1000, ÎóÖ¡ÂÊPER=0.00000e+00,ÎóÂëÂÊBER=0.00000e+00
µ±Ç°ÐÅµÀ±ê×¼²î=100.00,¿ªÏú=2.50,µ±Ç°Ö¡ÊýÎª1000, LTÂëÎóÂëÂÊBER_LT=7.95570e-04,RaptorÎóÂëÂÊBER=0.00000e+00
RaptorÎóÂëÂÊ´ïµ½ÒªÇó£¬²»ÔÙÔö¼ÓÐÅÔë±È
ÐÅµÀ±ê×¼²î·¶Î§Îª£º
Inf  
¿ªÏú·¶Î§Îª£º
2.45  2.50  2.55  2.60  
LTÎóÂëÂÊBER_LTÎª£º
9.72560e-04  7.95570e-04  0.00000e+00  0.00000e+00  
RaptorÎóÂëÂÊBERÎª£º
6.83000e-05  0.00000e+00  0.00000e+00  0.00000e+00  
Ê±¼äÒÑ¹ý 380211.227629 Ãë¡£
