# Supplementary material for: An Efficient Design of Systematic Rateless Codes
Source: Hindawi journal article supplement (doi:10.1155/2020/8068414), 2020-05-19
Supplement: f1 [file 8068414.f1.zip › supplementary files/Matlab_code_for_Figure1/BER_by_Simulation/实际码字结果/AWGN_dist2019298_K10000_S.txt]

20190612²âÊÔËõÐ¡ÄÚÂëÊä³öLLRÐ§¹û£¬ÇÒËõ¼õÒò×ÓÎª

zoom_in =

     1


rho =

     0


sigma_n_2 =

   0.954529000000000


sigma_vec =

   Inf


dist_num =

     2.019298000000000e+03

µ±Ç°ÐÅµÀÎªPBIÐÅµÀ
K =

       10000


out_node_degree =

  1 ÖÁ 5 ÁÐ

                   0                   0                   0                   0                   0

  6 ÖÁ 10 ÁÐ

   0.846815465372582   0.045038486769935                   0                   0                   0

  11 ÖÁ 15 ÁÐ

                   0                   0                   0                   0                   0

  16 ÖÁ 20 ÁÐ

                   0                   0                   0                   0                   0

  21 ÖÁ 25 ÁÐ

                   0                   0                   0                   0                   0

  26 ÖÁ 30 ÁÐ

                   0                   0                   0                   0                   0

  31 ÖÁ 35 ÁÐ

                   0                   0                   0                   0                   0

  36 ÖÁ 39 ÁÐ

                   0                   0   0.000613563333579   0.107532484523904

ÕýÔÚ¶ÔÍâÂë½øÐÐÏßÐÔPEG±àÂë£¬ÇëÉÔµÈ...
µ±Ç°Ñ¡ÔñµÄÊÇÏµÍ³Âë
´íÎó±ÈÌØÊýºÍÖ¡Êý¶¼´ïµ½Ò»¶¨Á¿£¬ÐèÒªÔö¼Ó¿ªÏú
µ±Ç°ÐÅµÀ±ê×¼²î=100.00,¿ªÏú=0.50,µ±Ç°Ö¡ÊýÎª20, LTÂëÎóÂëÂÊBER_LT=1.38970e-01,RaptorÎóÂëÂÊBER=1.38925e-01
´íÎó±ÈÌØÊýºÍÖ¡Êý¶¼´ïµ½Ò»¶¨Á¿£¬ÐèÒªÔö¼Ó¿ªÏú
µ±Ç°ÐÅµÀ±ê×¼²î=100.00,¿ªÏú=0.60,µ±Ç°Ö¡ÊýÎª20, LTÂëÎóÂëÂÊBER_LT=1.35775e-01,RaptorÎóÂëÂÊBER=1.35810e-01
´íÎó±ÈÌØÊýºÍÖ¡Êý¶¼´ïµ½Ò»¶¨Á¿£¬ÐèÒªÔö¼Ó¿ªÏú
µ±Ç°ÐÅµÀ±ê×¼²î=100.00,¿ªÏú=0.70,µ±Ç°Ö¡ÊýÎª20, LTÂëÎóÂëÂÊBER_LT=1.29949e-01,RaptorÎóÂëÂÊBER=1.30025e-01
´íÎó±ÈÌØÊýºÍÖ¡Êý¶¼´ïµ½Ò»¶¨Á¿£¬ÐèÒªÔö¼Ó¿ªÏú
µ±Ç°ÐÅµÀ±ê×¼²î=100.00,¿ªÏú=0.80,µ±Ç°Ö¡ÊýÎª20, LTÂëÎóÂëÂÊBER_LT=1.27769e-01,RaptorÎóÂëÂÊBER=1.27990e-01
´íÎó±ÈÌØÊýºÍÖ¡Êý¶¼´ïµ½Ò»¶¨Á¿£¬ÐèÒªÔö¼Ó¿ªÏú
µ±Ç°ÐÅµÀ±ê×¼²î=100.00,¿ªÏú=0.90,µ±Ç°Ö¡ÊýÎª20, LTÂëÎóÂëÂÊBER_LT=1.15430e-01,RaptorÎóÂëÂÊBER=1.15380e-01
´íÎó±ÈÌØÊýºÍÖ¡Êý¶¼´ïµ½Ò»¶¨Á¿£¬ÐèÒªÔö¼Ó¿ªÏú
µ±Ç°ÐÅµÀ±ê×¼²î=100.00,¿ªÏú=1.00,µ±Ç°Ö¡ÊýÎª20, LTÂëÎóÂëÂÊBER_LT=9.69277e-02,RaptorÎóÂëÂÊBER=9.69750e-02
´íÎó±ÈÌØÊýºÍÖ¡Êý¶¼´ïµ½Ò»¶¨Á¿£¬ÐèÒªÔö¼Ó¿ªÏú
µ±Ç°ÐÅµÀ±ê×¼²î=100.00,¿ªÏú=1.10,µ±Ç°Ö¡ÊýÎª48, LTÂëÎóÂëÂÊBER_LT=3.17604e-02,RaptorÎóÂëÂÊBER=3.06583e-02
LTÂë£¬µ±Ç°¿ªÏú=1.20,µ±Ç°Ö¡ÊýÎª50, ÎóÖ¡ÂÊPER=1.00000e+00,ÎóÂëÂÊBER=9.99608e-04
RaptorÂë£¬µ±Ç°¿ªÏú=1.20,µ±Ç°Ö¡ÊýÎª50, ÎóÖ¡ÂÊPER=0.00000e+00,ÎóÂëÂÊBER=0.00000e+00
LTÂë£¬µ±Ç°¿ªÏú=1.20,µ±Ç°Ö¡ÊýÎª100, ÎóÖ¡ÂÊPER=1.00000e+00,ÎóÂëÂÊBER=9.99608e-04
RaptorÂë£¬µ±Ç°¿ªÏú=1.20,µ±Ç°Ö¡ÊýÎª100, ÎóÖ¡ÂÊPER=0.00000e+00,ÎóÂëÂÊBER=0.00000e+00
LTÂë£¬µ±Ç°¿ªÏú=1.20,µ±Ç°Ö¡ÊýÎª150, ÎóÖ¡ÂÊPER=1.00000e+00,ÎóÂëÂÊBER=1.02443e-03
RaptorÂë£¬µ±Ç°¿ªÏú=1.20,µ±Ç°Ö¡ÊýÎª150, ÎóÖ¡ÂÊPER=0.00000e+00,ÎóÂëÂÊBER=0.00000e+00
LTÂë£¬µ±Ç°¿ªÏú=1.20,µ±Ç°Ö¡ÊýÎª200, ÎóÖ¡ÂÊPER=1.00000e+00,ÎóÂëÂÊBER=1.00794e-03
RaptorÂë£¬µ±Ç°¿ªÏú=1.20,µ±Ç°Ö¡ÊýÎª200, ÎóÖ¡ÂÊPER=0.00000e+00,ÎóÂëÂÊBER=0.00000e+00
LTÂë£¬µ±Ç°¿ªÏú=1.20,µ±Ç°Ö¡ÊýÎª250, ÎóÖ¡ÂÊPER=1.00000e+00,ÎóÂëÂÊBER=1.01411e-03
RaptorÂë£¬µ±Ç°¿ªÏú=1.20,µ±Ç°Ö¡ÊýÎª250, ÎóÖ¡ÂÊPER=0.00000e+00,ÎóÂëÂÊBER=0.00000e+00
LTÂë£¬µ±Ç°¿ªÏú=1.20,µ±Ç°Ö¡ÊýÎª300, ÎóÖ¡ÂÊPER=1.00000e+00,ÎóÂëÂÊBER=1.04763e-03
RaptorÂë£¬µ±Ç°¿ªÏú=1.20,µ±Ç°Ö¡ÊýÎª300, ÎóÖ¡ÂÊPER=3.33333e-03,ÎóÂëÂÊBER=4.46667e-05
LTÂë£¬µ±Ç°¿ªÏú=1.20,µ±Ç°Ö¡ÊýÎª350, ÎóÖ¡ÂÊPER=1.00000e+00,ÎóÂëÂÊBER=1.04133e-03
RaptorÂë£¬µ±Ç°¿ªÏú=1.20,µ±Ç°Ö¡ÊýÎª350, ÎóÖ¡ÂÊPER=2.85714e-03,ÎóÂëÂÊBER=3.82857e-05
LTÂë£¬µ±Ç°¿ªÏú=1.20,µ±Ç°Ö¡ÊýÎª400, ÎóÖ¡ÂÊPER=1.00000e+00,ÎóÂëÂÊBER=1.02484e-03
RaptorÂë£¬µ±Ç°¿ªÏú=1.20,µ±Ç°Ö¡ÊýÎª400, ÎóÖ¡ÂÊPER=2.50000e-03,ÎóÂëÂÊBER=3.35000e-05
LTÂë£¬µ±Ç°¿ªÏú=1.20,µ±Ç°Ö¡ÊýÎª450, ÎóÖ¡ÂÊPER=1.00000e+00,ÎóÂëÂÊBER=1.02139e-03
RaptorÂë£¬µ±Ç°¿ªÏú=1.20,µ±Ç°Ö¡ÊýÎª450, ÎóÖ¡ÂÊPER=2.22222e-03,ÎóÂëÂÊBER=2.97778e-05
LTÂë£¬µ±Ç°¿ªÏú=1.20,µ±Ç°Ö¡ÊýÎª500, ÎóÖ¡ÂÊPER=1.00000e+00,ÎóÂëÂÊBER=1.01235e-03
RaptorÂë£¬µ±Ç°¿ªÏú=1.20,µ±Ç°Ö¡ÊýÎª500, ÎóÖ¡ÂÊPER=2.00000e-03,ÎóÂëÂÊBER=2.68000e-05
µ±Ç°ÐÅµÀ±ê×¼²î=100.00,¿ªÏú=1.20,µ±Ç°Ö¡ÊýÎª500, LTÂëÎóÂëÂÊBER_LT=1.01235e-03,RaptorÎóÂëÂÊBER=2.68000e-05
LTÂë£¬µ±Ç°¿ªÏú=1.30,µ±Ç°Ö¡ÊýÎª50, ÎóÖ¡ÂÊPER=1.00000e+00,ÎóÂëÂÊBER=5.60564e-04
RaptorÂë£¬µ±Ç°¿ªÏú=1.30,µ±Ç°Ö¡ÊýÎª50, ÎóÖ¡ÂÊPER=0.00000e+00,ÎóÂëÂÊBER=0.00000e+00
LTÂë£¬µ±Ç°¿ªÏú=1.30,µ±Ç°Ö¡ÊýÎª100, ÎóÖ¡ÂÊPER=9.90000e-01,ÎóÂëÂÊBER=5.79185e-04
RaptorÂë£¬µ±Ç°¿ªÏú=1.30,µ±Ç°Ö¡ÊýÎª100, ÎóÖ¡ÂÊPER=0.00000e+00,ÎóÂëÂÊBER=0.00000e+00
LTÂë£¬µ±Ç°¿ªÏú=1.30,µ±Ç°Ö¡ÊýÎª150, ÎóÖ¡ÂÊPER=9.93333e-01,ÎóÂëÂÊBER=5.80165e-04
RaptorÂë£¬µ±Ç°¿ªÏú=1.30,µ±Ç°Ö¡ÊýÎª150, ÎóÖ¡ÂÊPER=0.00000e+00,ÎóÂëÂÊBER=0.00000e+00
LTÂë£¬µ±Ç°¿ªÏú=1.30,µ±Ç°Ö¡ÊýÎª200, ÎóÖ¡ÂÊPER=9.90000e-01,ÎóÂëÂÊBER=5.98295e-04
RaptorÂë£¬µ±Ç°¿ªÏú=1.30,µ±Ç°Ö¡ÊýÎª200, ÎóÖ¡ÂÊPER=0.00000e+00,ÎóÂëÂÊBER=0.00000e+00
LTÂë£¬µ±Ç°¿ªÏú=1.30,µ±Ç°Ö¡ÊýÎª250, ÎóÖ¡ÂÊPER=9.92000e-01,ÎóÂëÂÊBER=5.96237e-04
RaptorÂë£¬µ±Ç°¿ªÏú=1.30,µ±Ç°Ö¡ÊýÎª250, ÎóÖ¡ÂÊPER=0.00000e+00,ÎóÂëÂÊBER=0.00000e+00
LTÂë£¬µ±Ç°¿ªÏú=1.30,µ±Ç°Ö¡ÊýÎª300, ÎóÖ¡ÂÊPER=9.93333e-01,ÎóÂëÂÊBER=6.16098e-04
RaptorÂë£¬µ±Ç°¿ªÏú=1.30,µ±Ç°Ö¡ÊýÎª300, ÎóÖ¡ÂÊPER=0.00000e+00,ÎóÂëÂÊBER=0.00000e+00
LTÂë£¬µ±Ç°¿ªÏú=1.30,µ±Ç°Ö¡ÊýÎª350, ÎóÖ¡ÂÊPER=9.91429e-01,ÎóÂëÂÊBER=6.06765e-04
RaptorÂë£¬µ±Ç°¿ªÏú=1.30,µ±Ç°Ö¡ÊýÎª350, ÎóÖ¡ÂÊPER=0.00000e+00,ÎóÂëÂÊBER=0.00000e+00
LTÂë£¬µ±Ç°¿ªÏú=1.30,µ±Ç°Ö¡ÊýÎª400, ÎóÖ¡ÂÊPER=9.87500e-01,ÎóÂëÂÊBER=6.03440e-04
RaptorÂë£¬µ±Ç°¿ªÏú=1.30,µ±Ç°Ö¡ÊýÎª400, ÎóÖ¡ÂÊPER=0.00000e+00,ÎóÂëÂÊBER=0.00000e+00
LTÂë£¬µ±Ç°¿ªÏú=1.30,µ±Ç°Ö¡ÊýÎª450, ÎóÖ¡ÂÊPER=9.88889e-01,ÎóÂëÂÊBER=6.08258e-04
RaptorÂë£¬µ±Ç°¿ªÏú=1.30,µ±Ç°Ö¡ÊýÎª450, ÎóÖ¡ÂÊPER=0.00000e+00,ÎóÂëÂÊBER=0.00000e+00
LTÂë£¬µ±Ç°¿ªÏú=1.30,µ±Ç°Ö¡ÊýÎª500, ÎóÖ¡ÂÊPER=9.90000e-01,ÎóÂëÂÊBER=6.05057e-04
RaptorÂë£¬µ±Ç°¿ªÏú=1.30,µ±Ç°Ö¡ÊýÎª500, ÎóÖ¡ÂÊPER=0.00000e+00,ÎóÂëÂÊBER=0.00000e+00
µ±Ç°ÐÅµÀ±ê×¼²î=100.00,¿ªÏú=1.30,µ±Ç°Ö¡ÊýÎª500, LTÂëÎóÂëÂÊBER_LT=6.05057e-04,RaptorÎóÂëÂÊBER=0.00000e+00
LTÂë£¬µ±Ç°¿ªÏú=1.40,µ±Ç°Ö¡ÊýÎª50, ÎóÖ¡ÂÊPER=9.80000e-01,ÎóÂëÂÊBER=3.13603e-04
RaptorÂë£¬µ±Ç°¿ªÏú=1.40,µ±Ç°Ö¡ÊýÎª50, ÎóÖ¡ÂÊPER=0.00000e+00,ÎóÂëÂÊBER=0.00000e+00
LTÂë£¬µ±Ç°¿ªÏú=1.40,µ±Ç°Ö¡ÊýÎª100, ÎóÖ¡ÂÊPER=9.60000e-01,ÎóÂëÂÊBER=3.31243e-04
RaptorÂë£¬µ±Ç°¿ªÏú=1.40,µ±Ç°Ö¡ÊýÎª100, ÎóÖ¡ÂÊPER=0.00000e+00,ÎóÂëÂÊBER=0.00000e+00
LTÂë£¬µ±Ç°¿ªÏú=1.40,µ±Ç°Ö¡ÊýÎª150, ÎóÖ¡ÂÊPER=9.46667e-01,ÎóÂëÂÊBER=3.39736e-04
RaptorÂë£¬µ±Ç°¿ªÏú=1.40,µ±Ç°Ö¡ÊýÎª150, ÎóÖ¡ÂÊPER=0.00000e+00,ÎóÂëÂÊBER=0.00000e+00
LTÂë£¬µ±Ç°¿ªÏú=1.40,µ±Ç°Ö¡ÊýÎª200, ÎóÖ¡ÂÊPER=9.55000e-01,ÎóÂëÂÊBER=3.44473e-04
RaptorÂë£¬µ±Ç°¿ªÏú=1.40,µ±Ç°Ö¡ÊýÎª200, ÎóÖ¡ÂÊPER=0.00000e+00,ÎóÂëÂÊBER=0.00000e+00
LTÂë£¬µ±Ç°¿ªÏú=1.40,µ±Ç°Ö¡ÊýÎª250, ÎóÖ¡ÂÊPER=9.52000e-01,ÎóÂëÂÊBER=3.42219e-04
RaptorÂë£¬µ±Ç°¿ªÏú=1.40,µ±Ç°Ö¡ÊýÎª250, ÎóÖ¡ÂÊPER=0.00000e+00,ÎóÂëÂÊBER=0.00000e+00
LTÂë£¬µ±Ç°¿ªÏú=1.40,µ±Ç°Ö¡ÊýÎª300, ÎóÖ¡ÂÊPER=9.50000e-01,ÎóÂëÂÊBER=3.40063e-04
RaptorÂë£¬µ±Ç°¿ªÏú=1.40,µ±Ç°Ö¡ÊýÎª300, ÎóÖ¡ÂÊPER=0.00000e+00,ÎóÂëÂÊBER=0.00000e+00
LTÂë£¬µ±Ç°¿ªÏú=1.40,µ±Ç°Ö¡ÊýÎª350, ÎóÖ¡ÂÊPER=9.48571e-01,ÎóÂëÂÊBER=3.48603e-04
RaptorÂë£¬µ±Ç°¿ªÏú=1.40,µ±Ç°Ö¡ÊýÎª350, ÎóÖ¡ÂÊPER=0.00000e+00,ÎóÂëÂÊBER=0.00000e+00
LTÂë£¬µ±Ç°¿ªÏú=1.40,µ±Ç°Ö¡ÊýÎª400, ÎóÖ¡ÂÊPER=9.50000e-01,ÎóÂëÂÊBER=3.47658e-04
RaptorÂë£¬µ±Ç°¿ªÏú=1.40,µ±Ç°Ö¡ÊýÎª400, ÎóÖ¡ÂÊPER=0.00000e+00,ÎóÂëÂÊBER=0.00000e+00
LTÂë£¬µ±Ç°¿ªÏú=1.40,µ±Ç°Ö¡ÊýÎª450, ÎóÖ¡ÂÊPER=9.53333e-01,ÎóÂëÂÊBER=3.43874e-04
RaptorÂë£¬µ±Ç°¿ªÏú=1.40,µ±Ç°Ö¡ÊýÎª450, ÎóÖ¡ÂÊPER=0.00000e+00,ÎóÂëÂÊBER=0.00000e+00
LTÂë£¬µ±Ç°¿ªÏú=1.40,µ±Ç°Ö¡ÊýÎª500, ÎóÖ¡ÂÊPER=9.48000e-01,ÎóÂëÂÊBER=3.40847e-04
RaptorÂë£¬µ±Ç°¿ªÏú=1.40,µ±Ç°Ö¡ÊýÎª500, ÎóÖ¡ÂÊPER=0.00000e+00,ÎóÂëÂÊBER=0.00000e+00
µ±Ç°ÐÅµÀ±ê×¼²î=100.00,¿ªÏú=1.40,µ±Ç°Ö¡ÊýÎª500, LTÂëÎóÂëÂÊBER_LT=3.40847e-04,RaptorÎóÂëÂÊBER=0.00000e+00
LTÂë£¬µ±Ç°¿ªÏú=1.50,µ±Ç°Ö¡ÊýÎª50, ÎóÖ¡ÂÊPER=8.20000e-01,ÎóÂëÂÊBER=2.05802e-04
RaptorÂë£¬µ±Ç°¿ªÏú=1.50,µ±Ç°Ö¡ÊýÎª50, ÎóÖ¡ÂÊPER=0.00000e+00,ÎóÂëÂÊBER=0.00000e+00
LTÂë£¬µ±Ç°¿ªÏú=1.50,µ±Ç°Ö¡ÊýÎª100, ÎóÖ¡ÂÊPER=8.30000e-01,ÎóÂëÂÊBER=2.12662e-04
RaptorÂë£¬µ±Ç°¿ªÏú=1.50,µ±Ç°Ö¡ÊýÎª100, ÎóÖ¡ÂÊPER=0.00000e+00,ÎóÂëÂÊBER=0.00000e+00
LTÂë£¬µ±Ç°¿ªÏú=1.50,µ±Ç°Ö¡ÊýÎª150, ÎóÖ¡ÂÊPER=8.53333e-01,ÎóÂëÂÊBER=2.24748e-04
RaptorÂë£¬µ±Ç°¿ªÏú=1.50,µ±Ç°Ö¡ÊýÎª150, ÎóÖ¡ÂÊPER=0.00000e+00,ÎóÂëÂÊBER=0.00000e+00
LTÂë£¬µ±Ç°¿ªÏú=1.50,µ±Ç°Ö¡ÊýÎª200, ÎóÖ¡ÂÊPER=8.75000e-01,ÎóÂëÂÊBER=2.27852e-04
RaptorÂë£¬µ±Ç°¿ªÏú=1.50,µ±Ç°Ö¡ÊýÎª200, ÎóÖ¡ÂÊPER=0.00000e+00,ÎóÂëÂÊBER=0.00000e+00
LTÂë£¬µ±Ç°¿ªÏú=1.50,µ±Ç°Ö¡ÊýÎª250, ÎóÖ¡ÂÊPER=8.72000e-01,ÎóÂëÂÊBER=2.25010e-04
RaptorÂë£¬µ±Ç°¿ªÏú=1.50,µ±Ç°Ö¡ÊýÎª250, ÎóÖ¡ÂÊPER=0.00000e+00,ÎóÂëÂÊBER=0.00000e+00
LTÂë£¬µ±Ç°¿ªÏú=1.50,µ±Ç°Ö¡ÊýÎª300, ÎóÖ¡ÂÊPER=8.70000e-01,ÎóÂëÂÊBER=2.18215e-04
RaptorÂë£¬µ±Ç°¿ªÏú=1.50,µ±Ç°Ö¡ÊýÎª300, ÎóÖ¡ÂÊPER=0.00000e+00,ÎóÂëÂÊBER=0.00000e+00
LTÂë£¬µ±Ç°¿ªÏú=1.50,µ±Ç°Ö¡ÊýÎª350, ÎóÖ¡ÂÊPER=8.71429e-01,ÎóÂëÂÊBER=2.22602e-04
RaptorÂë£¬µ±Ç°¿ªÏú=1.50,µ±Ç°Ö¡ÊýÎª350, ÎóÖ¡ÂÊPER=0.00000e+00,ÎóÂëÂÊBER=0.00000e+00
LTÂë£¬µ±Ç°¿ªÏú=1.50,µ±Ç°Ö¡ÊýÎª400, ÎóÖ¡ÂÊPER=8.82500e-01,ÎóÂëÂÊBER=2.24667e-04
RaptorÂë£¬µ±Ç°¿ªÏú=1.50,µ±Ç°Ö¡ÊýÎª400, ÎóÖ¡ÂÊPER=0.00000e+00,ÎóÂëÂÊBER=0.00000e+00
LTÂë£¬µ±Ç°¿ªÏú=1.50,µ±Ç°Ö¡ÊýÎª450, ÎóÖ¡ÂÊPER=8.84444e-01,ÎóÂëÂÊBER=2.25402e-04
RaptorÂë£¬µ±Ç°¿ªÏú=1.50,µ±Ç°Ö¡ÊýÎª450, ÎóÖ¡ÂÊPER=0.00000e+00,ÎóÂëÂÊBER=0.00000e+00
LTÂë£¬µ±Ç°¿ªÏú=1.50,µ±Ç°Ö¡ÊýÎª500, ÎóÖ¡ÂÊPER=8.82000e-01,ÎóÂëÂÊBER=2.28146e-04
RaptorÂë£¬µ±Ç°¿ªÏú=1.50,µ±Ç°Ö¡ÊýÎª500, ÎóÖ¡ÂÊPER=0.00000e+00,ÎóÂëÂÊBER=0.00000e+00
µ±Ç°ÐÅµÀ±ê×¼²î=100.00,¿ªÏú=1.50,µ±Ç°Ö¡ÊýÎª500, LTÂëÎóÂëÂÊBER_LT=2.28146e-04,RaptorÎóÂëÂÊBER=0.00000e+00
LTÂë£¬µ±Ç°¿ªÏú=1.60,µ±Ç°Ö¡ÊýÎª50, ÎóÖ¡ÂÊPER=8.20000e-01,ÎóÂëÂÊBER=1.58761e-04
RaptorÂë£¬µ±Ç°¿ªÏú=1.60,µ±Ç°Ö¡ÊýÎª50, ÎóÖ¡ÂÊPER=0.00000e+00,ÎóÂëÂÊBER=0.00000e+00
LTÂë£¬µ±Ç°¿ªÏú=1.60,µ±Ç°Ö¡ÊýÎª100, ÎóÖ¡ÂÊPER=7.40000e-01,ÎóÂëÂÊBER=1.45041e-04
RaptorÂë£¬µ±Ç°¿ªÏú=1.60,µ±Ç°Ö¡ÊýÎª100, ÎóÖ¡ÂÊPER=0.00000e+00,ÎóÂëÂÊBER=0.00000e+00
LTÂë£¬µ±Ç°¿ªÏú=1.60,µ±Ç°Ö¡ÊýÎª150, ÎóÖ¡ÂÊPER=7.73333e-01,ÎóÂëÂÊBER=1.58108e-04
RaptorÂë£¬µ±Ç°¿ªÏú=1.60,µ±Ç°Ö¡ÊýÎª150, ÎóÖ¡ÂÊPER=0.00000e+00,ÎóÂëÂÊBER=0.00000e+00
LTÂë£¬µ±Ç°¿ªÏú=1.60,µ±Ç°Ö¡ÊýÎª200, ÎóÖ¡ÂÊPER=7.90000e-01,ÎóÂëÂÊBER=1.60231e-04
RaptorÂë£¬µ±Ç°¿ªÏú=1.60,µ±Ç°Ö¡ÊýÎª200, ÎóÖ¡ÂÊPER=0.00000e+00,ÎóÂëÂÊBER=0.00000e+00
LTÂë£¬µ±Ç°¿ªÏú=1.60,µ±Ç°Ö¡ÊýÎª250, ÎóÖ¡ÂÊPER=7.84000e-01,ÎóÂëÂÊBER=1.58761e-04
RaptorÂë£¬µ±Ç°¿ªÏú=1.60,µ±Ç°Ö¡ÊýÎª250, ÎóÖ¡ÂÊPER=0.00000e+00,ÎóÂëÂÊBER=0.00000e+00
LTÂë£¬µ±Ç°¿ªÏú=1.60,µ±Ç°Ö¡ÊýÎª300, ÎóÖ¡ÂÊPER=7.83333e-01,ÎóÂëÂÊBER=1.57455e-04
RaptorÂë£¬µ±Ç°¿ªÏú=1.60,µ±Ç°Ö¡ÊýÎª300, ÎóÖ¡ÂÊPER=0.00000e+00,ÎóÂëÂÊBER=0.00000e+00
LTÂë£¬µ±Ç°¿ªÏú=1.60,µ±Ç°Ö¡ÊýÎª350, ÎóÖ¡ÂÊPER=7.91429e-01,ÎóÂëÂÊBER=1.57641e-04
RaptorÂë£¬µ±Ç°¿ªÏú=1.60,µ±Ç°Ö¡ÊýÎª350, ÎóÖ¡ÂÊPER=0.00000e+00,ÎóÂëÂÊBER=0.00000e+00
LTÂë£¬µ±Ç°¿ªÏú=1.60,µ±Ç°Ö¡ÊýÎª400, ÎóÖ¡ÂÊPER=7.90000e-01,ÎóÂëÂÊBER=1.55821e-04
RaptorÂë£¬µ±Ç°¿ªÏú=1.60,µ±Ç°Ö¡ÊýÎª400, ÎóÖ¡ÂÊPER=0.00000e+00,ÎóÂëÂÊBER=0.00000e+00
LTÂë£¬µ±Ç°¿ªÏú=1.60,µ±Ç°Ö¡ÊýÎª450, ÎóÖ¡ÂÊPER=7.77778e-01,ÎóÂëÂÊBER=1.53317e-04
RaptorÂë£¬µ±Ç°¿ªÏú=1.60,µ±Ç°Ö¡ÊýÎª450, ÎóÖ¡ÂÊPER=0.00000e+00,ÎóÂëÂÊBER=0.00000e+00
LTÂë£¬µ±Ç°¿ªÏú=1.60,µ±Ç°Ö¡ÊýÎª500, ÎóÖ¡ÂÊPER=7.88000e-01,ÎóÂëÂÊBER=1.55233e-04
RaptorÂë£¬µ±Ç°¿ªÏú=1.60,µ±Ç°Ö¡ÊýÎª500, ÎóÖ¡ÂÊPER=0.00000e+00,ÎóÂëÂÊBER=0.00000e+00
µ±Ç°ÐÅµÀ±ê×¼²î=100.00,¿ªÏú=1.60,µ±Ç°Ö¡ÊýÎª500, LTÂëÎóÂëÂÊBER_LT=1.55233e-04,RaptorÎóÂëÂÊBER=0.00000e+00
LTÂë£¬µ±Ç°¿ªÏú=1.70,µ±Ç°Ö¡ÊýÎª50, ÎóÖ¡ÂÊPER=6.00000e-01,ÎóÂëÂÊBER=8.82007e-05
RaptorÂë£¬µ±Ç°¿ªÏú=1.70,µ±Ç°Ö¡ÊýÎª50, ÎóÖ¡ÂÊPER=0.00000e+00,ÎóÂëÂÊBER=0.00000e+00
LTÂë£¬µ±Ç°¿ªÏú=1.70,µ±Ç°Ö¡ÊýÎª100, ÎóÖ¡ÂÊPER=5.80000e-01,ÎóÂëÂÊBER=8.72207e-05
RaptorÂë£¬µ±Ç°¿ªÏú=1.70,µ±Ç°Ö¡ÊýÎª100, ÎóÖ¡ÂÊPER=0.00000e+00,ÎóÂëÂÊBER=0.00000e+00
LTÂë£¬µ±Ç°¿ªÏú=1.70,µ±Ç°Ö¡ÊýÎª150, ÎóÖ¡ÂÊPER=6.00000e-01,ÎóÂëÂÊBER=9.14674e-05
RaptorÂë£¬µ±Ç°¿ªÏú=1.70,µ±Ç°Ö¡ÊýÎª150, ÎóÖ¡ÂÊPER=0.00000e+00,ÎóÂëÂÊBER=0.00000e+00
LTÂë£¬µ±Ç°¿ªÏú=1.70,µ±Ç°Ö¡ÊýÎª200, ÎóÖ¡ÂÊPER=5.60000e-01,ÎóÂëÂÊBER=8.47707e-05
RaptorÂë£¬µ±Ç°¿ªÏú=1.70,µ±Ç°Ö¡ÊýÎª200, ÎóÖ¡ÂÊPER=0.00000e+00,ÎóÂëÂÊBER=0.00000e+00
LTÂë£¬µ±Ç°¿ªÏú=1.70,µ±Ç°Ö¡ÊýÎª250, ÎóÖ¡ÂÊPER=5.72000e-01,ÎóÂëÂÊBER=8.50647e-05
RaptorÂë£¬µ±Ç°¿ªÏú=1.70,µ±Ç°Ö¡ÊýÎª250, ÎóÖ¡ÂÊPER=0.00000e+00,ÎóÂëÂÊBER=0.00000e+00
LTÂë£¬µ±Ç°¿ªÏú=1.70,µ±Ç°Ö¡ÊýÎª300, ÎóÖ¡ÂÊPER=5.76667e-01,ÎóÂëÂÊBER=8.65674e-05
RaptorÂë£¬µ±Ç°¿ªÏú=1.70,µ±Ç°Ö¡ÊýÎª300, ÎóÖ¡ÂÊPER=0.00000e+00,ÎóÂëÂÊBER=0.00000e+00
LTÂë£¬µ±Ç°¿ªÏú=1.70,µ±Ç°Ö¡ÊýÎª350, ÎóÖ¡ÂÊPER=5.88571e-01,ÎóÂëÂÊBER=8.90407e-05
RaptorÂë£¬µ±Ç°¿ªÏú=1.70,µ±Ç°Ö¡ÊýÎª350, ÎóÖ¡ÂÊPER=0.00000e+00,ÎóÂëÂÊBER=0.00000e+00
LTÂë£¬µ±Ç°¿ªÏú=1.70,µ±Ç°Ö¡ÊýÎª400, ÎóÖ¡ÂÊPER=5.87500e-01,ÎóÂëÂÊBER=8.86907e-05
RaptorÂë£¬µ±Ç°¿ªÏú=1.70,µ±Ç°Ö¡ÊýÎª400, ÎóÖ¡ÂÊPER=0.00000e+00,ÎóÂëÂÊBER=0.00000e+00
LTÂë£¬µ±Ç°¿ªÏú=1.70,µ±Ç°Ö¡ÊýÎª450, ÎóÖ¡ÂÊPER=5.91111e-01,ÎóÂëÂÊBER=8.88540e-05
RaptorÂë£¬µ±Ç°¿ªÏú=1.70,µ±Ç°Ö¡ÊýÎª450, ÎóÖ¡ÂÊPER=0.00000e+00,ÎóÂëÂÊBER=0.00000e+00
LTÂë£¬µ±Ç°¿ªÏú=1.70,µ±Ç°Ö¡ÊýÎª500, ÎóÖ¡ÂÊPER=5.84000e-01,ÎóÂëÂÊBER=8.82007e-05
RaptorÂë£¬µ±Ç°¿ªÏú=1.70,µ±Ç°Ö¡ÊýÎª500, ÎóÖ¡ÂÊPER=0.00000e+00,ÎóÂëÂÊBER=0.00000e+00
µ±Ç°ÐÅµÀ±ê×¼²î=100.00,¿ªÏú=1.70,µ±Ç°Ö¡ÊýÎª500, LTÂëÎóÂëÂÊBER_LT=8.82007e-05,RaptorÎóÂëÂÊBER=0.00000e+00
LTÂë£¬µ±Ç°¿ªÏú=1.80,µ±Ç°Ö¡ÊýÎª50, ÎóÖ¡ÂÊPER=3.40000e-01,ÎóÂëÂÊBER=4.31203e-05
RaptorÂë£¬µ±Ç°¿ªÏú=1.80,µ±Ç°Ö¡ÊýÎª50, ÎóÖ¡ÂÊPER=0.00000e+00,ÎóÂëÂÊBER=0.00000e+00
LTÂë£¬µ±Ç°¿ªÏú=1.80,µ±Ç°Ö¡ÊýÎª100, ÎóÖ¡ÂÊPER=4.10000e-01,ÎóÂëÂÊBER=5.09604e-05
RaptorÂë£¬µ±Ç°¿ªÏú=1.80,µ±Ç°Ö¡ÊýÎª100, ÎóÖ¡ÂÊPER=0.00000e+00,ÎóÂëÂÊBER=0.00000e+00
LTÂë£¬µ±Ç°¿ªÏú=1.80,µ±Ç°Ö¡ÊýÎª150, ÎóÖ¡ÂÊPER=4.33333e-01,ÎóÂëÂÊBER=5.55338e-05
RaptorÂë£¬µ±Ç°¿ªÏú=1.80,µ±Ç°Ö¡ÊýÎª150, ÎóÖ¡ÂÊPER=0.00000e+00,ÎóÂëÂÊBER=0.00000e+00
LTÂë£¬µ±Ç°¿ªÏú=1.80,µ±Ç°Ö¡ÊýÎª200, ÎóÖ¡ÂÊPER=4.40000e-01,ÎóÂëÂÊBER=5.48804e-05
RaptorÂë£¬µ±Ç°¿ªÏú=1.80,µ±Ç°Ö¡ÊýÎª200, ÎóÖ¡ÂÊPER=0.00000e+00,ÎóÂëÂÊBER=0.00000e+00
LTÂë£¬µ±Ç°¿ªÏú=1.80,µ±Ç°Ö¡ÊýÎª250, ÎóÖ¡ÂÊPER=4.28000e-01,ÎóÂëÂÊBER=5.44884e-05
RaptorÂë£¬µ±Ç°¿ªÏú=1.80,µ±Ç°Ö¡ÊýÎª250, ÎóÖ¡ÂÊPER=0.00000e+00,ÎóÂëÂÊBER=0.00000e+00
LTÂë£¬µ±Ç°¿ªÏú=1.80,µ±Ç°Ö¡ÊýÎª300, ÎóÖ¡ÂÊPER=4.36667e-01,ÎóÂëÂÊBER=5.61871e-05
RaptorÂë£¬µ±Ç°¿ªÏú=1.80,µ±Ç°Ö¡ÊýÎª300, ÎóÖ¡ÂÊPER=0.00000e+00,ÎóÂëÂÊBER=0.00000e+00
LTÂë£¬µ±Ç°¿ªÏú=1.80,µ±Ç°Ö¡ÊýÎª350, ÎóÖ¡ÂÊPER=4.22857e-01,ÎóÂëÂÊBER=5.54404e-05
RaptorÂë£¬µ±Ç°¿ªÏú=1.80,µ±Ç°Ö¡ÊýÎª350, ÎóÖ¡ÂÊPER=0.00000e+00,ÎóÂëÂÊBER=0.00000e+00
LTÂë£¬µ±Ç°¿ªÏú=1.80,µ±Ç°Ö¡ÊýÎª400, ÎóÖ¡ÂÊPER=4.25000e-01,ÎóÂëÂÊBER=5.58604e-05
RaptorÂë£¬µ±Ç°¿ªÏú=1.80,µ±Ç°Ö¡ÊýÎª400, ÎóÖ¡ÂÊPER=0.00000e+00,ÎóÂëÂÊBER=0.00000e+00
LTÂë£¬µ±Ç°¿ªÏú=1.80,µ±Ç°Ö¡ÊýÎª450, ÎóÖ¡ÂÊPER=4.31111e-01,ÎóÂëÂÊBER=5.79294e-05
RaptorÂë£¬µ±Ç°¿ªÏú=1.80,µ±Ç°Ö¡ÊýÎª450, ÎóÖ¡ÂÊPER=0.00000e+00,ÎóÂëÂÊBER=0.00000e+00
LTÂë£¬µ±Ç°¿ªÏú=1.80,µ±Ç°Ö¡ÊýÎª500, ÎóÖ¡ÂÊPER=4.34000e-01,ÎóÂëÂÊBER=5.93885e-05
RaptorÂë£¬µ±Ç°¿ªÏú=1.80,µ±Ç°Ö¡ÊýÎª500, ÎóÖ¡ÂÊPER=0.00000e+00,ÎóÂëÂÊBER=0.00000e+00
µ±Ç°ÐÅµÀ±ê×¼²î=100.00,¿ªÏú=1.80,µ±Ç°Ö¡ÊýÎª500, LTÂëÎóÂëÂÊBER_LT=5.93885e-05,RaptorÎóÂëÂÊBER=0.00000e+00
LTÂë£¬µ±Ç°¿ªÏú=1.90,µ±Ç°Ö¡ÊýÎª50, ÎóÖ¡ÂÊPER=2.20000e-01,ÎóÂëÂÊBER=2.74402e-05
RaptorÂë£¬µ±Ç°¿ªÏú=1.90,µ±Ç°Ö¡ÊýÎª50, ÎóÖ¡ÂÊPER=0.00000e+00,ÎóÂëÂÊBER=0.00000e+00
LTÂë£¬µ±Ç°¿ªÏú=1.90,µ±Ç°Ö¡ÊýÎª100, ÎóÖ¡ÂÊPER=3.00000e-01,ÎóÂëÂÊBER=4.01803e-05
RaptorÂë£¬µ±Ç°¿ªÏú=1.90,µ±Ç°Ö¡ÊýÎª100, ÎóÖ¡ÂÊPER=0.00000e+00,ÎóÂëÂÊBER=0.00000e+00
LTÂë£¬µ±Ç°¿ªÏú=1.90,µ±Ç°Ö¡ÊýÎª150, ÎóÖ¡ÂÊPER=3.06667e-01,ÎóÂëÂÊBER=4.05070e-05
RaptorÂë£¬µ±Ç°¿ªÏú=1.90,µ±Ç°Ö¡ÊýÎª150, ÎóÖ¡ÂÊPER=0.00000e+00,ÎóÂëÂÊBER=0.00000e+00
LTÂë£¬µ±Ç°¿ªÏú=1.90,µ±Ç°Ö¡ÊýÎª200, ÎóÖ¡ÂÊPER=3.05000e-01,ÎóÂëÂÊBER=3.96903e-05
RaptorÂë£¬µ±Ç°¿ªÏú=1.90,µ±Ç°Ö¡ÊýÎª200, ÎóÖ¡ÂÊPER=0.00000e+00,ÎóÂëÂÊBER=0.00000e+00
LTÂë£¬µ±Ç°¿ªÏú=1.90,µ±Ç°Ö¡ÊýÎª250, ÎóÖ¡ÂÊPER=3.48000e-01,ÎóÂëÂÊBER=4.46884e-05
RaptorÂë£¬µ±Ç°¿ªÏú=1.90,µ±Ç°Ö¡ÊýÎª250, ÎóÖ¡ÂÊPER=0.00000e+00,ÎóÂëÂÊBER=0.00000e+00
LTÂë£¬µ±Ç°¿ªÏú=1.90,µ±Ç°Ö¡ÊýÎª300, ÎóÖ¡ÂÊPER=3.60000e-01,ÎóÂëÂÊBER=4.57337e-05
RaptorÂë£¬µ±Ç°¿ªÏú=1.90,µ±Ç°Ö¡ÊýÎª300, ÎóÖ¡ÂÊPER=0.00000e+00,ÎóÂëÂÊBER=0.00000e+00
LTÂë£¬µ±Ç°¿ªÏú=1.90,µ±Ç°Ö¡ÊýÎª350, ÎóÖ¡ÂÊPER=3.54286e-01,ÎóÂëÂÊBER=4.42404e-05
RaptorÂë£¬µ±Ç°¿ªÏú=1.90,µ±Ç°Ö¡ÊýÎª350, ÎóÖ¡ÂÊPER=0.00000e+00,ÎóÂëÂÊBER=0.00000e+00
LTÂë£¬µ±Ç°¿ªÏú=1.90,µ±Ç°Ö¡ÊýÎª400, ÎóÖ¡ÂÊPER=3.55000e-01,ÎóÂëÂÊBER=4.45904e-05
RaptorÂë£¬µ±Ç°¿ªÏú=1.90,µ±Ç°Ö¡ÊýÎª400, ÎóÖ¡ÂÊPER=0.00000e+00,ÎóÂëÂÊBER=0.00000e+00
LTÂë£¬µ±Ç°¿ªÏú=1.90,µ±Ç°Ö¡ÊýÎª450, ÎóÖ¡ÂÊPER=3.51111e-01,ÎóÂëÂÊBER=4.37737e-05
RaptorÂë£¬µ±Ç°¿ªÏú=1.90,µ±Ç°Ö¡ÊýÎª450, ÎóÖ¡ÂÊPER=0.00000e+00,ÎóÂëÂÊBER=0.00000e+00
LTÂë£¬µ±Ç°¿ªÏú=1.90,µ±Ç°Ö¡ÊýÎª500, ÎóÖ¡ÂÊPER=3.46000e-01,ÎóÂëÂÊBER=4.39044e-05
RaptorÂë£¬µ±Ç°¿ªÏú=1.90,µ±Ç°Ö¡ÊýÎª500, ÎóÖ¡ÂÊPER=0.00000e+00,ÎóÂëÂÊBER=0.00000e+00
µ±Ç°ÐÅµÀ±ê×¼²î=100.00,¿ªÏú=1.90,µ±Ç°Ö¡ÊýÎª500, LTÂëÎóÂëÂÊBER_LT=4.39044e-05,RaptorÎóÂëÂÊBER=0.00000e+00
LTÂë£¬µ±Ç°¿ªÏú=2.00,µ±Ç°Ö¡ÊýÎª50, ÎóÖ¡ÂÊPER=3.00000e-01,ÎóÂëÂÊBER=3.33203e-05
RaptorÂë£¬µ±Ç°¿ªÏú=2.00,µ±Ç°Ö¡ÊýÎª50, ÎóÖ¡ÂÊPER=0.00000e+00,ÎóÂëÂÊBER=0.00000e+00
LTÂë£¬µ±Ç°¿ªÏú=2.00,µ±Ç°Ö¡ÊýÎª100, ÎóÖ¡ÂÊPER=3.20000e-01,ÎóÂëÂÊBER=3.72403e-05
RaptorÂë£¬µ±Ç°¿ªÏú=2.00,µ±Ç°Ö¡ÊýÎª100, ÎóÖ¡ÂÊPER=0.00000e+00,ÎóÂëÂÊBER=0.00000e+00
LTÂë£¬µ±Ç°¿ªÏú=2.00,µ±Ç°Ö¡ÊýÎª150, ÎóÖ¡ÂÊPER=2.86667e-01,ÎóÂëÂÊBER=3.26669e-05
RaptorÂë£¬µ±Ç°¿ªÏú=2.00,µ±Ç°Ö¡ÊýÎª150, ÎóÖ¡ÂÊPER=0.00000e+00,ÎóÂëÂÊBER=0.00000e+00
LTÂë£¬µ±Ç°¿ªÏú=2.00,µ±Ç°Ö¡ÊýÎª200, ÎóÖ¡ÂÊPER=2.65000e-01,ÎóÂëÂÊBER=2.94002e-05
RaptorÂë£¬µ±Ç°¿ªÏú=2.00,µ±Ç°Ö¡ÊýÎª200, ÎóÖ¡ÂÊPER=0.00000e+00,ÎóÂëÂÊBER=0.00000e+00
LTÂë£¬µ±Ç°¿ªÏú=2.00,µ±Ç°Ö¡ÊýÎª250, ÎóÖ¡ÂÊPER=2.48000e-01,ÎóÂëÂÊBER=2.78322e-05
RaptorÂë£¬µ±Ç°¿ªÏú=2.00,µ±Ç°Ö¡ÊýÎª250, ÎóÖ¡ÂÊPER=0.00000e+00,ÎóÂëÂÊBER=0.00000e+00
LTÂë£¬µ±Ç°¿ªÏú=2.00,µ±Ç°Ö¡ÊýÎª300, ÎóÖ¡ÂÊPER=2.40000e-01,ÎóÂëÂÊBER=2.77669e-05
RaptorÂë£¬µ±Ç°¿ªÏú=2.00,µ±Ç°Ö¡ÊýÎª300, ÎóÖ¡ÂÊPER=0.00000e+00,ÎóÂëÂÊBER=0.00000e+00
LTÂë£¬µ±Ç°¿ªÏú=2.00,µ±Ç°Ö¡ÊýÎª350, ÎóÖ¡ÂÊPER=2.34286e-01,ÎóÂëÂÊBER=2.71602e-05
RaptorÂë£¬µ±Ç°¿ªÏú=2.00,µ±Ç°Ö¡ÊýÎª350, ÎóÖ¡ÂÊPER=0.00000e+00,ÎóÂëÂÊBER=0.00000e+00
LTÂë£¬µ±Ç°¿ªÏú=2.00,µ±Ç°Ö¡ÊýÎª400, ÎóÖ¡ÂÊPER=2.27500e-01,ÎóÂëÂÊBER=2.59702e-05
RaptorÂë£¬µ±Ç°¿ªÏú=2.00,µ±Ç°Ö¡ÊýÎª400, ÎóÖ¡ÂÊPER=0.00000e+00,ÎóÂëÂÊBER=0.00000e+00
LTÂë£¬µ±Ç°¿ªÏú=2.00,µ±Ç°Ö¡ÊýÎª450, ÎóÖ¡ÂÊPER=2.35556e-01,ÎóÂëÂÊBER=2.70047e-05
RaptorÂë£¬µ±Ç°¿ªÏú=2.00,µ±Ç°Ö¡ÊýÎª450, ÎóÖ¡ÂÊPER=0.00000e+00,ÎóÂëÂÊBER=0.00000e+00
LTÂë£¬µ±Ç°¿ªÏú=2.00,µ±Ç°Ö¡ÊýÎª500, ÎóÖ¡ÂÊPER=2.32000e-01,ÎóÂëÂÊBER=2.64602e-05
RaptorÂë£¬µ±Ç°¿ªÏú=2.00,µ±Ç°Ö¡ÊýÎª500, ÎóÖ¡ÂÊPER=0.00000e+00,ÎóÂëÂÊBER=0.00000e+00
µ±Ç°ÐÅµÀ±ê×¼²î=100.00,¿ªÏú=2.00,µ±Ç°Ö¡ÊýÎª500, LTÂëÎóÂëÂÊBER_LT=2.64602e-05,RaptorÎóÂëÂÊBER=0.00000e+00
ÐÅµÀ±ê×¼²î·¶Î§Îª£º
Inf  
¿ªÏú·¶Î§Îª£º
0.50  0.60  0.70  0.80  0.90  1.00  1.10  1.20  1.30  1.40  1.50  1.60  1.70  1.80  1.90  2.00  
LTÎóÂëÂÊBER_LTÎª£º
1.38970e-01  1.35775e-01  1.29949e-01  1.27769e-01  1.15430e-01  9.69277e-02  3.17604e-02  1.01235e-03  6.05057e-04  3.40847e-04  2.28146e-04  1.55233e-04  8.82007e-05  5.93885e-05  4.39044e-05  2.64602e-05  
RaptorÎóÂëÂÊBERÎª£º
1.38925e-01  1.35810e-01  1.30025e-01  1.27990e-01  1.15380e-01  9.69750e-02  3.06583e-02  2.68000e-05  0.00000e+00  0.00000e+00  0.00000e+00  0.00000e+00  0.00000e+00  0.00000e+00  0.00000e+00  0.00000e+00  
Ê±¼äÒÑ¹ý 326287.133396 Ãë¡£
