# Supplementary material for: An Efficient Design of Systematic Rateless Codes
Source: Hindawi journal article supplement (doi:10.1155/2020/8068414), 2020-05-19
Supplement: f1 [file 8068414.f1.zip › supplementary files/Matlab_code_for_Figure1/BER_by_Simulation/实际码字结果/AWGN_dist2019298_K10000_S_part2.txt]

20190612²âÊÔËõÐ¡ÄÚÂëÊä³öLLRÐ§¹û£¬ÇÒËõ¼õÒò×ÓÎª

zoom_in =

     1


rho =

     0


sigma_n_2 =

   0.954529000000000


sigma_vec =

   Inf


overhead_vec =

  1 ÖÁ 5 ÁÐ

   1.200000000000000   1.250000000000000   1.300000000000000   1.350000000000000   1.400000000000000

  6 ÖÁ 10 ÁÐ

   1.450000000000000   1.500000000000000   1.550000000000000   1.600000000000000   1.650000000000000

  11 ÖÁ 15 ÁÐ

   1.700000000000000   1.750000000000000   1.800000000000000   1.850000000000000   1.900000000000000

  16 ÖÁ 17 ÁÐ

   1.950000000000000   2.000000000000000


dist_num =

     2.019298000000000e+03

µ±Ç°ÐÅµÀÎªPBIÐÅµÀ
K =

       10000


out_node_degree =

  1 ÖÁ 5 ÁÐ

                   0                   0                   0                   0                   0

  6 ÖÁ 10 ÁÐ

   0.846815465372582   0.045038486769935                   0                   0                   0

  11 ÖÁ 15 ÁÐ

                   0                   0                   0                   0                   0

  16 ÖÁ 20 ÁÐ

                   0                   0                   0                   0                   0

  21 ÖÁ 25 ÁÐ

                   0                   0                   0                   0                   0

  26 ÖÁ 30 ÁÐ

                   0                   0                   0                   0                   0

  31 ÖÁ 35 ÁÐ

                   0                   0                   0                   0                   0

  36 ÖÁ 39 ÁÐ

                   0                   0   0.000613563333579   0.107532484523904

ÕýÔÚ¶ÔÍâÂë½øÐÐÏßÐÔPEG±àÂë£¬ÇëÉÔµÈ...
µ±Ç°Ñ¡ÔñµÄÊÇÏµÍ³Âë
LTÂë£¬µ±Ç°¿ªÏú=1.20,µ±Ç°Ö¡ÊýÎª50, ÎóÖ¡ÂÊPER=1.00000e+00,ÎóÂëÂÊBER=1.08781e-03
RaptorÂë£¬µ±Ç°¿ªÏú=1.20,µ±Ç°Ö¡ÊýÎª50, ÎóÖ¡ÂÊPER=0.00000e+00,ÎóÂëÂÊBER=0.00000e+00
LTÂë£¬µ±Ç°¿ªÏú=1.20,µ±Ç°Ö¡ÊýÎª100, ÎóÖ¡ÂÊPER=1.00000e+00,ÎóÂëÂÊBER=1.04175e-03
RaptorÂë£¬µ±Ç°¿ªÏú=1.20,µ±Ç°Ö¡ÊýÎª100, ÎóÖ¡ÂÊPER=0.00000e+00,ÎóÂëÂÊBER=0.00000e+00
LTÂë£¬µ±Ç°¿ªÏú=1.20,µ±Ç°Ö¡ÊýÎª150, ÎóÖ¡ÂÊPER=1.00000e+00,ÎóÂëÂÊBER=1.03750e-03
RaptorÂë£¬µ±Ç°¿ªÏú=1.20,µ±Ç°Ö¡ÊýÎª150, ÎóÖ¡ÂÊPER=0.00000e+00,ÎóÂëÂÊBER=0.00000e+00
LTÂë£¬µ±Ç°¿ªÏú=1.20,µ±Ç°Ö¡ÊýÎª200, ÎóÖ¡ÂÊPER=1.00000e+00,ÎóÂëÂÊBER=1.04812e-03
RaptorÂë£¬µ±Ç°¿ªÏú=1.20,µ±Ç°Ö¡ÊýÎª200, ÎóÖ¡ÂÊPER=0.00000e+00,ÎóÂëÂÊBER=0.00000e+00
LTÂë£¬µ±Ç°¿ªÏú=1.20,µ±Ç°Ö¡ÊýÎª250, ÎóÖ¡ÂÊPER=1.00000e+00,ÎóÂëÂÊBER=1.03685e-03
RaptorÂë£¬µ±Ç°¿ªÏú=1.20,µ±Ç°Ö¡ÊýÎª250, ÎóÖ¡ÂÊPER=0.00000e+00,ÎóÂëÂÊBER=0.00000e+00
LTÂë£¬µ±Ç°¿ªÏú=1.20,µ±Ç°Ö¡ÊýÎª300, ÎóÖ¡ÂÊPER=1.00000e+00,ÎóÂëÂÊBER=1.02999e-03
RaptorÂë£¬µ±Ç°¿ªÏú=1.20,µ±Ç°Ö¡ÊýÎª300, ÎóÖ¡ÂÊPER=0.00000e+00,ÎóÂëÂÊBER=0.00000e+00
LTÂë£¬µ±Ç°¿ªÏú=1.20,µ±Ç°Ö¡ÊýÎª350, ÎóÖ¡ÂÊPER=1.00000e+00,ÎóÂëÂÊBER=1.02901e-03
RaptorÂë£¬µ±Ç°¿ªÏú=1.20,µ±Ç°Ö¡ÊýÎª350, ÎóÖ¡ÂÊPER=0.00000e+00,ÎóÂëÂÊBER=0.00000e+00
LTÂë£¬µ±Ç°¿ªÏú=1.20,µ±Ç°Ö¡ÊýÎª400, ÎóÖ¡ÂÊPER=1.00000e+00,ÎóÂëÂÊBER=1.02141e-03
RaptorÂë£¬µ±Ç°¿ªÏú=1.20,µ±Ç°Ö¡ÊýÎª400, ÎóÖ¡ÂÊPER=0.00000e+00,ÎóÂëÂÊBER=0.00000e+00
LTÂë£¬µ±Ç°¿ªÏú=1.20,µ±Ç°Ö¡ÊýÎª450, ÎóÖ¡ÂÊPER=1.00000e+00,ÎóÂëÂÊBER=1.01943e-03
RaptorÂë£¬µ±Ç°¿ªÏú=1.20,µ±Ç°Ö¡ÊýÎª450, ÎóÖ¡ÂÊPER=0.00000e+00,ÎóÂëÂÊBER=0.00000e+00
LTÂë£¬µ±Ç°¿ªÏú=1.20,µ±Ç°Ö¡ÊýÎª500, ÎóÖ¡ÂÊPER=1.00000e+00,ÎóÂëÂÊBER=1.01372e-03
RaptorÂë£¬µ±Ç°¿ªÏú=1.20,µ±Ç°Ö¡ÊýÎª500, ÎóÖ¡ÂÊPER=0.00000e+00,ÎóÂëÂÊBER=0.00000e+00
LTÂë£¬µ±Ç°¿ªÏú=1.20,µ±Ç°Ö¡ÊýÎª550, ÎóÖ¡ÂÊPER=1.00000e+00,ÎóÂëÂÊBER=1.01226e-03
RaptorÂë£¬µ±Ç°¿ªÏú=1.20,µ±Ç°Ö¡ÊýÎª550, ÎóÖ¡ÂÊPER=0.00000e+00,ÎóÂëÂÊBER=0.00000e+00
LTÂë£¬µ±Ç°¿ªÏú=1.20,µ±Ç°Ö¡ÊýÎª600, ÎóÖ¡ÂÊPER=1.00000e+00,ÎóÂëÂÊBER=1.01365e-03
RaptorÂë£¬µ±Ç°¿ªÏú=1.20,µ±Ç°Ö¡ÊýÎª600, ÎóÖ¡ÂÊPER=0.00000e+00,ÎóÂëÂÊBER=0.00000e+00
LTÂë£¬µ±Ç°¿ªÏú=1.20,µ±Ç°Ö¡ÊýÎª650, ÎóÖ¡ÂÊPER=1.00000e+00,ÎóÂëÂÊBER=1.01348e-03
RaptorÂë£¬µ±Ç°¿ªÏú=1.20,µ±Ç°Ö¡ÊýÎª650, ÎóÖ¡ÂÊPER=0.00000e+00,ÎóÂëÂÊBER=0.00000e+00
LTÂë£¬µ±Ç°¿ªÏú=1.20,µ±Ç°Ö¡ÊýÎª700, ÎóÖ¡ÂÊPER=1.00000e+00,ÎóÂëÂÊBER=1.01977e-03
RaptorÂë£¬µ±Ç°¿ªÏú=1.20,µ±Ç°Ö¡ÊýÎª700, ÎóÖ¡ÂÊPER=0.00000e+00,ÎóÂëÂÊBER=0.00000e+00
LTÂë£¬µ±Ç°¿ªÏú=1.20,µ±Ç°Ö¡ÊýÎª750, ÎóÖ¡ÂÊPER=1.00000e+00,ÎóÂëÂÊBER=1.01803e-03
RaptorÂë£¬µ±Ç°¿ªÏú=1.20,µ±Ç°Ö¡ÊýÎª750, ÎóÖ¡ÂÊPER=0.00000e+00,ÎóÂëÂÊBER=0.00000e+00
LTÂë£¬µ±Ç°¿ªÏú=1.20,µ±Ç°Ö¡ÊýÎª800, ÎóÖ¡ÂÊPER=1.00000e+00,ÎóÂëÂÊBER=1.00953e-03
RaptorÂë£¬µ±Ç°¿ªÏú=1.20,µ±Ç°Ö¡ÊýÎª800, ÎóÖ¡ÂÊPER=0.00000e+00,ÎóÂëÂÊBER=0.00000e+00
LTÂë£¬µ±Ç°¿ªÏú=1.20,µ±Ç°Ö¡ÊýÎª850, ÎóÖ¡ÂÊPER=1.00000e+00,ÎóÂëÂÊBER=1.01218e-03
RaptorÂë£¬µ±Ç°¿ªÏú=1.20,µ±Ç°Ö¡ÊýÎª850, ÎóÖ¡ÂÊPER=0.00000e+00,ÎóÂëÂÊBER=0.00000e+00
LTÂë£¬µ±Ç°¿ªÏú=1.20,µ±Ç°Ö¡ÊýÎª900, ÎóÖ¡ÂÊPER=1.00000e+00,ÎóÂëÂÊBER=1.01877e-03
RaptorÂë£¬µ±Ç°¿ªÏú=1.20,µ±Ç°Ö¡ÊýÎª900, ÎóÖ¡ÂÊPER=0.00000e+00,ÎóÂëÂÊBER=0.00000e+00
LTÂë£¬µ±Ç°¿ªÏú=1.20,µ±Ç°Ö¡ÊýÎª950, ÎóÖ¡ÂÊPER=1.00000e+00,ÎóÂëÂÊBER=1.01838e-03
RaptorÂë£¬µ±Ç°¿ªÏú=1.20,µ±Ç°Ö¡ÊýÎª950, ÎóÖ¡ÂÊPER=0.00000e+00,ÎóÂëÂÊBER=0.00000e+00
LTÂë£¬µ±Ç°¿ªÏú=1.20,µ±Ç°Ö¡ÊýÎª1000, ÎóÖ¡ÂÊPER=1.00000e+00,ÎóÂëÂÊBER=1.01891e-03
RaptorÂë£¬µ±Ç°¿ªÏú=1.20,µ±Ç°Ö¡ÊýÎª1000, ÎóÖ¡ÂÊPER=0.00000e+00,ÎóÂëÂÊBER=0.00000e+00
LTÂë£¬µ±Ç°¿ªÏú=1.20,µ±Ç°Ö¡ÊýÎª1050, ÎóÖ¡ÂÊPER=1.00000e+00,ÎóÂëÂÊBER=1.13942e-03
RaptorÂë£¬µ±Ç°¿ªÏú=1.20,µ±Ç°Ö¡ÊýÎª1050, ÎóÖ¡ÂÊPER=9.52381e-04,ÎóÂëÂÊBER=1.25238e-04
LTÂë£¬µ±Ç°¿ªÏú=1.20,µ±Ç°Ö¡ÊýÎª1100, ÎóÖ¡ÂÊPER=1.00000e+00,ÎóÂëÂÊBER=1.14091e-03
RaptorÂë£¬µ±Ç°¿ªÏú=1.20,µ±Ç°Ö¡ÊýÎª1100, ÎóÖ¡ÂÊPER=9.09091e-04,ÎóÂëÂÊBER=1.19545e-04
LTÂë£¬µ±Ç°¿ªÏú=1.20,µ±Ç°Ö¡ÊýÎª1150, ÎóÖ¡ÂÊPER=1.00000e+00,ÎóÂëÂÊBER=1.13698e-03
RaptorÂë£¬µ±Ç°¿ªÏú=1.20,µ±Ç°Ö¡ÊýÎª1150, ÎóÖ¡ÂÊPER=8.69565e-04,ÎóÂëÂÊBER=1.14348e-04
LTÂë£¬µ±Ç°¿ªÏú=1.20,µ±Ç°Ö¡ÊýÎª1200, ÎóÖ¡ÂÊPER=9.99167e-01,ÎóÂëÂÊBER=1.13852e-03
RaptorÂë£¬µ±Ç°¿ªÏú=1.20,µ±Ç°Ö¡ÊýÎª1200, ÎóÖ¡ÂÊPER=8.33333e-04,ÎóÂëÂÊBER=1.09583e-04
LTÂë£¬µ±Ç°¿ªÏú=1.20,µ±Ç°Ö¡ÊýÎª1250, ÎóÖ¡ÂÊPER=9.99200e-01,ÎóÂëÂÊBER=1.13720e-03
RaptorÂë£¬µ±Ç°¿ªÏú=1.20,µ±Ç°Ö¡ÊýÎª1250, ÎóÖ¡ÂÊPER=8.00000e-04,ÎóÂëÂÊBER=1.05200e-04
LTÂë£¬µ±Ç°¿ªÏú=1.20,µ±Ç°Ö¡ÊýÎª1300, ÎóÖ¡ÂÊPER=9.99231e-01,ÎóÂëÂÊBER=1.13206e-03
RaptorÂë£¬µ±Ç°¿ªÏú=1.20,µ±Ç°Ö¡ÊýÎª1300, ÎóÖ¡ÂÊPER=7.69231e-04,ÎóÂëÂÊBER=1.01154e-04
LTÂë£¬µ±Ç°¿ªÏú=1.20,µ±Ç°Ö¡ÊýÎª1350, ÎóÖ¡ÂÊPER=9.99259e-01,ÎóÂëÂÊBER=1.12570e-03
RaptorÂë£¬µ±Ç°¿ªÏú=1.20,µ±Ç°Ö¡ÊýÎª1350, ÎóÖ¡ÂÊPER=7.40741e-04,ÎóÂëÂÊBER=9.74074e-05
LTÂë£¬µ±Ç°¿ªÏú=1.20,µ±Ç°Ö¡ÊýÎª1400, ÎóÖ¡ÂÊPER=9.99286e-01,ÎóÂëÂÊBER=1.12638e-03
RaptorÂë£¬µ±Ç°¿ªÏú=1.20,µ±Ç°Ö¡ÊýÎª1400, ÎóÖ¡ÂÊPER=7.14286e-04,ÎóÂëÂÊBER=9.39286e-05
LTÂë£¬µ±Ç°¿ªÏú=1.20,µ±Ç°Ö¡ÊýÎª1450, ÎóÖ¡ÂÊPER=9.99310e-01,ÎóÂëÂÊBER=1.12120e-03
RaptorÂë£¬µ±Ç°¿ªÏú=1.20,µ±Ç°Ö¡ÊýÎª1450, ÎóÖ¡ÂÊPER=6.89655e-04,ÎóÂëÂÊBER=9.06897e-05
LTÂë£¬µ±Ç°¿ªÏú=1.20,µ±Ç°Ö¡ÊýÎª1500, ÎóÖ¡ÂÊPER=9.99333e-01,ÎóÂëÂÊBER=1.12048e-03
RaptorÂë£¬µ±Ç°¿ªÏú=1.20,µ±Ç°Ö¡ÊýÎª1500, ÎóÖ¡ÂÊPER=6.66667e-04,ÎóÂëÂÊBER=8.76667e-05
LTÂë£¬µ±Ç°¿ªÏú=1.20,µ±Ç°Ö¡ÊýÎª1550, ÎóÖ¡ÂÊPER=9.99355e-01,ÎóÂëÂÊBER=1.11563e-03
RaptorÂë£¬µ±Ç°¿ªÏú=1.20,µ±Ç°Ö¡ÊýÎª1550, ÎóÖ¡ÂÊPER=6.45161e-04,ÎóÂëÂÊBER=8.48387e-05
LTÂë£¬µ±Ç°¿ªÏú=1.20,µ±Ç°Ö¡ÊýÎª1600, ÎóÖ¡ÂÊPER=9.99375e-01,ÎóÂëÂÊBER=1.11268e-03
RaptorÂë£¬µ±Ç°¿ªÏú=1.20,µ±Ç°Ö¡ÊýÎª1600, ÎóÖ¡ÂÊPER=6.25000e-04,ÎóÂëÂÊBER=8.21875e-05
LTÂë£¬µ±Ç°¿ªÏú=1.20,µ±Ç°Ö¡ÊýÎª1650, ÎóÖ¡ÂÊPER=9.99394e-01,ÎóÂëÂÊBER=1.11020e-03
RaptorÂë£¬µ±Ç°¿ªÏú=1.20,µ±Ç°Ö¡ÊýÎª1650, ÎóÖ¡ÂÊPER=6.06061e-04,ÎóÂëÂÊBER=7.96970e-05
LTÂë£¬µ±Ç°¿ªÏú=1.20,µ±Ç°Ö¡ÊýÎª1700, ÎóÖ¡ÂÊPER=9.99412e-01,ÎóÂëÂÊBER=1.17382e-03
RaptorÂë£¬µ±Ç°¿ªÏú=1.20,µ±Ç°Ö¡ÊýÎª1700, ÎóÖ¡ÂÊPER=1.17647e-03,ÎóÂëÂÊBER=1.42353e-04
LTÂë£¬µ±Ç°¿ªÏú=1.20,µ±Ç°Ö¡ÊýÎª1750, ÎóÖ¡ÂÊPER=9.99429e-01,ÎóÂëÂÊBER=1.17108e-03
RaptorÂë£¬µ±Ç°¿ªÏú=1.20,µ±Ç°Ö¡ÊýÎª1750, ÎóÖ¡ÂÊPER=1.14286e-03,ÎóÂëÂÊBER=1.38286e-04
LTÂë£¬µ±Ç°¿ªÏú=1.20,µ±Ç°Ö¡ÊýÎª1800, ÎóÖ¡ÂÊPER=9.99444e-01,ÎóÂëÂÊBER=1.16583e-03
RaptorÂë£¬µ±Ç°¿ªÏú=1.20,µ±Ç°Ö¡ÊýÎª1800, ÎóÖ¡ÂÊPER=1.11111e-03,ÎóÂëÂÊBER=1.34444e-04
LTÂë£¬µ±Ç°¿ªÏú=1.20,µ±Ç°Ö¡ÊýÎª1850, ÎóÖ¡ÂÊPER=9.99459e-01,ÎóÂëÂÊBER=1.16134e-03
RaptorÂë£¬µ±Ç°¿ªÏú=1.20,µ±Ç°Ö¡ÊýÎª1850, ÎóÖ¡ÂÊPER=1.08108e-03,ÎóÂëÂÊBER=1.30811e-04
LTÂë£¬µ±Ç°¿ªÏú=1.20,µ±Ç°Ö¡ÊýÎª1900, ÎóÖ¡ÂÊPER=9.99474e-01,ÎóÂëÂÊBER=1.16311e-03
RaptorÂë£¬µ±Ç°¿ªÏú=1.20,µ±Ç°Ö¡ÊýÎª1900, ÎóÖ¡ÂÊPER=1.57895e-03,ÎóÂëÂÊBER=1.33947e-04
LTÂë£¬µ±Ç°¿ªÏú=1.20,µ±Ç°Ö¡ÊýÎª1950, ÎóÖ¡ÂÊPER=9.99487e-01,ÎóÂëÂÊBER=1.16013e-03
RaptorÂë£¬µ±Ç°¿ªÏú=1.20,µ±Ç°Ö¡ÊýÎª1950, ÎóÖ¡ÂÊPER=1.53846e-03,ÎóÂëÂÊBER=1.30513e-04
LTÂë£¬µ±Ç°¿ªÏú=1.20,µ±Ç°Ö¡ÊýÎª2000, ÎóÖ¡ÂÊPER=9.99500e-01,ÎóÂëÂÊBER=1.15509e-03
RaptorÂë£¬µ±Ç°¿ªÏú=1.20,µ±Ç°Ö¡ÊýÎª2000, ÎóÖ¡ÂÊPER=1.50000e-03,ÎóÂëÂÊBER=1.27250e-04
µ±Ç°ÐÅµÀ±ê×¼²î=100.00,¿ªÏú=1.20,µ±Ç°Ö¡ÊýÎª2000, LTÂëÎóÂëÂÊBER_LT=1.15509e-03,RaptorÎóÂëÂÊBER=1.27250e-04
LTÂë£¬µ±Ç°¿ªÏú=1.25,µ±Ç°Ö¡ÊýÎª50, ÎóÖ¡ÂÊPER=9.80000e-01,ÎóÂëÂÊBER=7.76166e-04
RaptorÂë£¬µ±Ç°¿ªÏú=1.25,µ±Ç°Ö¡ÊýÎª50, ÎóÖ¡ÂÊPER=0.00000e+00,ÎóÂëÂÊBER=0.00000e+00
LTÂë£¬µ±Ç°¿ªÏú=1.25,µ±Ç°Ö¡ÊýÎª100, ÎóÖ¡ÂÊPER=9.90000e-01,ÎóÂëÂÊBER=7.52646e-04
RaptorÂë£¬µ±Ç°¿ªÏú=1.25,µ±Ç°Ö¡ÊýÎª100, ÎóÖ¡ÂÊPER=0.00000e+00,ÎóÂëÂÊBER=0.00000e+00
LTÂë£¬µ±Ç°¿ªÏú=1.25,µ±Ç°Ö¡ÊýÎª150, ÎóÖ¡ÂÊPER=9.93333e-01,ÎóÂëÂÊBER=7.52646e-04
RaptorÂë£¬µ±Ç°¿ªÏú=1.25,µ±Ç°Ö¡ÊýÎª150, ÎóÖ¡ÂÊPER=0.00000e+00,ÎóÂëÂÊBER=0.00000e+00
LTÂë£¬µ±Ç°¿ªÏú=1.25,µ±Ç°Ö¡ÊýÎª200, ÎóÖ¡ÂÊPER=9.95000e-01,ÎóÂëÂÊBER=7.58036e-04
RaptorÂë£¬µ±Ç°¿ªÏú=1.25,µ±Ç°Ö¡ÊýÎª200, ÎóÖ¡ÂÊPER=0.00000e+00,ÎóÂëÂÊBER=0.00000e+00
LTÂë£¬µ±Ç°¿ªÏú=1.25,µ±Ç°Ö¡ÊýÎª250, ÎóÖ¡ÂÊPER=9.96000e-01,ÎóÂëÂÊBER=7.38534e-04
RaptorÂë£¬µ±Ç°¿ªÏú=1.25,µ±Ç°Ö¡ÊýÎª250, ÎóÖ¡ÂÊPER=0.00000e+00,ÎóÂëÂÊBER=0.00000e+00
LTÂë£¬µ±Ç°¿ªÏú=1.25,µ±Ç°Ö¡ÊýÎª300, ÎóÖ¡ÂÊPER=9.96667e-01,ÎóÂëÂÊBER=7.46439e-04
RaptorÂë£¬µ±Ç°¿ªÏú=1.25,µ±Ç°Ö¡ÊýÎª300, ÎóÖ¡ÂÊPER=0.00000e+00,ÎóÂëÂÊBER=0.00000e+00
LTÂë£¬µ±Ç°¿ªÏú=1.25,µ±Ç°Ö¡ÊýÎª350, ÎóÖ¡ÂÊPER=9.97143e-01,ÎóÂëÂÊBER=7.43126e-04
RaptorÂë£¬µ±Ç°¿ªÏú=1.25,µ±Ç°Ö¡ÊýÎª350, ÎóÖ¡ÂÊPER=0.00000e+00,ÎóÂëÂÊBER=0.00000e+00
LTÂë£¬µ±Ç°¿ªÏú=1.25,µ±Ç°Ö¡ÊýÎª400, ÎóÖ¡ÂÊPER=9.97500e-01,ÎóÂëÂÊBER=7.51911e-04
RaptorÂë£¬µ±Ç°¿ªÏú=1.25,µ±Ç°Ö¡ÊýÎª400, ÎóÖ¡ÂÊPER=0.00000e+00,ÎóÂëÂÊBER=0.00000e+00
LTÂë£¬µ±Ç°¿ªÏú=1.25,µ±Ç°Ö¡ÊýÎª450, ÎóÖ¡ÂÊPER=9.97778e-01,ÎóÂëÂÊBER=7.51775e-04
RaptorÂë£¬µ±Ç°¿ªÏú=1.25,µ±Ç°Ö¡ÊýÎª450, ÎóÖ¡ÂÊPER=0.00000e+00,ÎóÂëÂÊBER=0.00000e+00
LTÂë£¬µ±Ç°¿ªÏú=1.25,µ±Ç°Ö¡ÊýÎª500, ÎóÖ¡ÂÊPER=9.98000e-01,ÎóÂëÂÊBER=7.58918e-04
RaptorÂë£¬µ±Ç°¿ªÏú=1.25,µ±Ç°Ö¡ÊýÎª500, ÎóÖ¡ÂÊPER=0.00000e+00,ÎóÂëÂÊBER=0.00000e+00
LTÂë£¬µ±Ç°¿ªÏú=1.25,µ±Ç°Ö¡ÊýÎª550, ÎóÖ¡ÂÊPER=9.98182e-01,ÎóÂëÂÊBER=7.59595e-04
RaptorÂë£¬µ±Ç°¿ªÏú=1.25,µ±Ç°Ö¡ÊýÎª550, ÎóÖ¡ÂÊPER=0.00000e+00,ÎóÂëÂÊBER=0.00000e+00
LTÂë£¬µ±Ç°¿ªÏú=1.25,µ±Ç°Ö¡ÊýÎª600, ÎóÖ¡ÂÊPER=9.98333e-01,ÎóÂëÂÊBER=7.56893e-04
RaptorÂë£¬µ±Ç°¿ªÏú=1.25,µ±Ç°Ö¡ÊýÎª600, ÎóÖ¡ÂÊPER=0.00000e+00,ÎóÂëÂÊBER=0.00000e+00
LTÂë£¬µ±Ç°¿ªÏú=1.25,µ±Ç°Ö¡ÊýÎª650, ÎóÖ¡ÂÊPER=9.98462e-01,ÎóÂëÂÊBER=7.59732e-04
RaptorÂë£¬µ±Ç°¿ªÏú=1.25,µ±Ç°Ö¡ÊýÎª650, ÎóÖ¡ÂÊPER=0.00000e+00,ÎóÂëÂÊBER=0.00000e+00
LTÂë£¬µ±Ç°¿ªÏú=1.25,µ±Ç°Ö¡ÊýÎª700, ÎóÖ¡ÂÊPER=9.98571e-01,ÎóÂëÂÊBER=7.52926e-04
RaptorÂë£¬µ±Ç°¿ªÏú=1.25,µ±Ç°Ö¡ÊýÎª700, ÎóÖ¡ÂÊPER=0.00000e+00,ÎóÂëÂÊBER=0.00000e+00
LTÂë£¬µ±Ç°¿ªÏú=1.25,µ±Ç°Ö¡ÊýÎª750, ÎóÖ¡ÂÊPER=9.98667e-01,ÎóÂëÂÊBER=7.51339e-04
RaptorÂë£¬µ±Ç°¿ªÏú=1.25,µ±Ç°Ö¡ÊýÎª750, ÎóÖ¡ÂÊPER=0.00000e+00,ÎóÂëÂÊBER=0.00000e+00
LTÂë£¬µ±Ç°¿ªÏú=1.25,µ±Ç°Ö¡ÊýÎª800, ÎóÖ¡ÂÊPER=9.97500e-01,ÎóÂëÂÊBER=7.45051e-04
RaptorÂë£¬µ±Ç°¿ªÏú=1.25,µ±Ç°Ö¡ÊýÎª800, ÎóÖ¡ÂÊPER=0.00000e+00,ÎóÂëÂÊBER=0.00000e+00
LTÂë£¬µ±Ç°¿ªÏú=1.25,µ±Ç°Ö¡ÊýÎª850, ÎóÖ¡ÂÊPER=9.97647e-01,ÎóÂëÂÊBER=7.49648e-04
RaptorÂë£¬µ±Ç°¿ªÏú=1.25,µ±Ç°Ö¡ÊýÎª850, ÎóÖ¡ÂÊPER=0.00000e+00,ÎóÂëÂÊBER=0.00000e+00
LTÂë£¬µ±Ç°¿ªÏú=1.25,µ±Ç°Ö¡ÊýÎª900, ÎóÖ¡ÂÊPER=9.97778e-01,ÎóÂëÂÊBER=7.47746e-04
RaptorÂë£¬µ±Ç°¿ªÏú=1.25,µ±Ç°Ö¡ÊýÎª900, ÎóÖ¡ÂÊPER=0.00000e+00,ÎóÂëÂÊBER=0.00000e+00
LTÂë£¬µ±Ç°¿ªÏú=1.25,µ±Ç°Ö¡ÊýÎª950, ÎóÖ¡ÂÊPER=9.97895e-01,ÎóÂëÂÊBER=7.49035e-04
RaptorÂë£¬µ±Ç°¿ªÏú=1.25,µ±Ç°Ö¡ÊýÎª950, ÎóÖ¡ÂÊPER=0.00000e+00,ÎóÂëÂÊBER=0.00000e+00
LTÂë£¬µ±Ç°¿ªÏú=1.25,µ±Ç°Ö¡ÊýÎª1000, ÎóÖ¡ÂÊPER=9.98000e-01,ÎóÂëÂÊBER=7.46570e-04
RaptorÂë£¬µ±Ç°¿ªÏú=1.25,µ±Ç°Ö¡ÊýÎª1000, ÎóÖ¡ÂÊPER=0.00000e+00,ÎóÂëÂÊBER=0.00000e+00
LTÂë£¬µ±Ç°¿ªÏú=1.25,µ±Ç°Ö¡ÊýÎª1050, ÎóÖ¡ÂÊPER=9.98095e-01,ÎóÂëÂÊBER=7.44899e-04
RaptorÂë£¬µ±Ç°¿ªÏú=1.25,µ±Ç°Ö¡ÊýÎª1050, ÎóÖ¡ÂÊPER=0.00000e+00,ÎóÂëÂÊBER=0.00000e+00
LTÂë£¬µ±Ç°¿ªÏú=1.25,µ±Ç°Ö¡ÊýÎª1100, ÎóÖ¡ÂÊPER=9.98182e-01,ÎóÂëÂÊBER=7.43826e-04
RaptorÂë£¬µ±Ç°¿ªÏú=1.25,µ±Ç°Ö¡ÊýÎª1100, ÎóÖ¡ÂÊPER=0.00000e+00,ÎóÂëÂÊBER=0.00000e+00
LTÂë£¬µ±Ç°¿ªÏú=1.25,µ±Ç°Ö¡ÊýÎª1150, ÎóÖ¡ÂÊPER=9.98261e-01,ÎóÂëÂÊBER=7.41823e-04
RaptorÂë£¬µ±Ç°¿ªÏú=1.25,µ±Ç°Ö¡ÊýÎª1150, ÎóÖ¡ÂÊPER=0.00000e+00,ÎóÂëÂÊBER=0.00000e+00
LTÂë£¬µ±Ç°¿ªÏú=1.25,µ±Ç°Ö¡ÊýÎª1200, ÎóÖ¡ÂÊPER=9.98333e-01,ÎóÂëÂÊBER=7.41703e-04
RaptorÂë£¬µ±Ç°¿ªÏú=1.25,µ±Ç°Ö¡ÊýÎª1200, ÎóÖ¡ÂÊPER=0.00000e+00,ÎóÂëÂÊBER=0.00000e+00
LTÂë£¬µ±Ç°¿ªÏú=1.25,µ±Ç°Ö¡ÊýÎª1250, ÎóÖ¡ÂÊPER=9.98400e-01,ÎóÂëÂÊBER=7.40572e-04
RaptorÂë£¬µ±Ç°¿ªÏú=1.25,µ±Ç°Ö¡ÊýÎª1250, ÎóÖ¡ÂÊPER=0.00000e+00,ÎóÂëÂÊBER=0.00000e+00
LTÂë£¬µ±Ç°¿ªÏú=1.25,µ±Ç°Ö¡ÊýÎª1300, ÎóÖ¡ÂÊPER=9.98462e-01,ÎóÂëÂÊBER=7.43374e-04
RaptorÂë£¬µ±Ç°¿ªÏú=1.25,µ±Ç°Ö¡ÊýÎª1300, ÎóÖ¡ÂÊPER=0.00000e+00,ÎóÂëÂÊBER=0.00000e+00
LTÂë£¬µ±Ç°¿ªÏú=1.25,µ±Ç°Ö¡ÊýÎª1350, ÎóÖ¡ÂÊPER=9.98519e-01,ÎóÂëÂÊBER=7.43499e-04
RaptorÂë£¬µ±Ç°¿ªÏú=1.25,µ±Ç°Ö¡ÊýÎª1350, ÎóÖ¡ÂÊPER=0.00000e+00,ÎóÂëÂÊBER=0.00000e+00
LTÂë£¬µ±Ç°¿ªÏú=1.25,µ±Ç°Ö¡ÊýÎª1400, ÎóÖ¡ÂÊPER=9.98571e-01,ÎóÂëÂÊBER=7.44946e-04
RaptorÂë£¬µ±Ç°¿ªÏú=1.25,µ±Ç°Ö¡ÊýÎª1400, ÎóÖ¡ÂÊPER=0.00000e+00,ÎóÂëÂÊBER=0.00000e+00
LTÂë£¬µ±Ç°¿ªÏú=1.25,µ±Ç°Ö¡ÊýÎª1450, ÎóÖ¡ÂÊPER=9.98621e-01,ÎóÂëÂÊBER=7.41629e-04
RaptorÂë£¬µ±Ç°¿ªÏú=1.25,µ±Ç°Ö¡ÊýÎª1450, ÎóÖ¡ÂÊPER=0.00000e+00,ÎóÂëÂÊBER=0.00000e+00
LTÂë£¬µ±Ç°¿ªÏú=1.25,µ±Ç°Ö¡ÊýÎª1500, ÎóÖ¡ÂÊPER=9.98667e-01,ÎóÂëÂÊBER=7.43891e-04
RaptorÂë£¬µ±Ç°¿ªÏú=1.25,µ±Ç°Ö¡ÊýÎª1500, ÎóÖ¡ÂÊPER=0.00000e+00,ÎóÂëÂÊBER=0.00000e+00
LTÂë£¬µ±Ç°¿ªÏú=1.25,µ±Ç°Ö¡ÊýÎª1550, ÎóÖ¡ÂÊPER=9.98710e-01,ÎóÂëÂÊBER=7.43099e-04
RaptorÂë£¬µ±Ç°¿ªÏú=1.25,µ±Ç°Ö¡ÊýÎª1550, ÎóÖ¡ÂÊPER=0.00000e+00,ÎóÂëÂÊBER=0.00000e+00
LTÂë£¬µ±Ç°¿ªÏú=1.25,µ±Ç°Ö¡ÊýÎª1600, ÎóÖ¡ÂÊPER=9.98750e-01,ÎóÂëÂÊBER=7.45418e-04
RaptorÂë£¬µ±Ç°¿ªÏú=1.25,µ±Ç°Ö¡ÊýÎª1600, ÎóÖ¡ÂÊPER=0.00000e+00,ÎóÂëÂÊBER=0.00000e+00
LTÂë£¬µ±Ç°¿ªÏú=1.25,µ±Ç°Ö¡ÊýÎª1650, ÎóÖ¡ÂÊPER=9.98788e-01,ÎóÂëÂÊBER=7.47538e-04
RaptorÂë£¬µ±Ç°¿ªÏú=1.25,µ±Ç°Ö¡ÊýÎª1650, ÎóÖ¡ÂÊPER=0.00000e+00,ÎóÂëÂÊBER=0.00000e+00
LTÂë£¬µ±Ç°¿ªÏú=1.25,µ±Ç°Ö¡ÊýÎª1700, ÎóÖ¡ÂÊPER=9.98824e-01,ÎóÂëÂÊBER=7.48553e-04
RaptorÂë£¬µ±Ç°¿ªÏú=1.25,µ±Ç°Ö¡ÊýÎª1700, ÎóÖ¡ÂÊPER=0.00000e+00,ÎóÂëÂÊBER=0.00000e+00
LTÂë£¬µ±Ç°¿ªÏú=1.25,µ±Ç°Ö¡ÊýÎª1750, ÎóÖ¡ÂÊPER=9.98857e-01,ÎóÂëÂÊBER=7.47942e-04
RaptorÂë£¬µ±Ç°¿ªÏú=1.25,µ±Ç°Ö¡ÊýÎª1750, ÎóÖ¡ÂÊPER=0.00000e+00,ÎóÂëÂÊBER=0.00000e+00
LTÂë£¬µ±Ç°¿ªÏú=1.25,µ±Ç°Ö¡ÊýÎª1800, ÎóÖ¡ÂÊPER=9.98889e-01,ÎóÂëÂÊBER=7.48454e-04
RaptorÂë£¬µ±Ç°¿ªÏú=1.25,µ±Ç°Ö¡ÊýÎª1800, ÎóÖ¡ÂÊPER=0.00000e+00,ÎóÂëÂÊBER=0.00000e+00
LTÂë£¬µ±Ç°¿ªÏú=1.25,µ±Ç°Ö¡ÊýÎª1850, ÎóÖ¡ÂÊPER=9.98919e-01,ÎóÂëÂÊBER=7.47561e-04
RaptorÂë£¬µ±Ç°¿ªÏú=1.25,µ±Ç°Ö¡ÊýÎª1850, ÎóÖ¡ÂÊPER=0.00000e+00,ÎóÂëÂÊBER=0.00000e+00
LTÂë£¬µ±Ç°¿ªÏú=1.25,µ±Ç°Ö¡ÊýÎª1900, ÎóÖ¡ÂÊPER=9.98947e-01,ÎóÂëÂÊBER=7.47230e-04
RaptorÂë£¬µ±Ç°¿ªÏú=1.25,µ±Ç°Ö¡ÊýÎª1900, ÎóÖ¡ÂÊPER=0.00000e+00,ÎóÂëÂÊBER=0.00000e+00
LTÂë£¬µ±Ç°¿ªÏú=1.25,µ±Ç°Ö¡ÊýÎª1950, ÎóÖ¡ÂÊPER=9.98974e-01,ÎóÂëÂÊBER=7.47419e-04
RaptorÂë£¬µ±Ç°¿ªÏú=1.25,µ±Ç°Ö¡ÊýÎª1950, ÎóÖ¡ÂÊPER=0.00000e+00,ÎóÂëÂÊBER=0.00000e+00
LTÂë£¬µ±Ç°¿ªÏú=1.25,µ±Ç°Ö¡ÊýÎª2000, ÎóÖ¡ÂÊPER=9.99000e-01,ÎóÂëÂÊBER=7.47550e-04
RaptorÂë£¬µ±Ç°¿ªÏú=1.25,µ±Ç°Ö¡ÊýÎª2000, ÎóÖ¡ÂÊPER=0.00000e+00,ÎóÂëÂÊBER=0.00000e+00
µ±Ç°ÐÅµÀ±ê×¼²î=100.00,¿ªÏú=1.25,µ±Ç°Ö¡ÊýÎª2000, LTÂëÎóÂëÂÊBER_LT=7.47550e-04,RaptorÎóÂëÂÊBER=0.00000e+00
RaptorÎóÂëÂÊ´ïµ½ÒªÇó£¬²»ÔÙÔö¼ÓÐÅÔë±È
ÐÅµÀ±ê×¼²î·¶Î§Îª£º
Inf  
¿ªÏú·¶Î§Îª£º
1.20  1.25  1.30  1.35  1.40  1.45  1.50  1.55  1.60  1.65  1.70  1.75  1.80  1.85  1.90  1.95  2.00  
LTÎóÂëÂÊBER_LTÎª£º
1.15509e-03  7.47550e-04  0.00000e+00  0.00000e+00  0.00000e+00  0.00000e+00  0.00000e+00  0.00000e+00  0.00000e+00  0.00000e+00  0.00000e+00  0.00000e+00  0.00000e+00  0.00000e+00  0.00000e+00  0.00000e+00  0.00000e+00  
RaptorÎóÂëÂÊBERÎª£º
1.27250e-04  0.00000e+00  0.00000e+00  0.00000e+00  0.00000e+00  0.00000e+00  0.00000e+00  0.00000e+00  0.00000e+00  0.00000e+00  0.00000e+00  0.00000e+00  0.00000e+00  0.00000e+00  0.00000e+00  0.00000e+00  0.00000e+00  
Ê±¼äÒÑ¹ý 215427.409310 Ãë¡£
