# Supplementary material for: An Efficient Design of Systematic Rateless Codes
Source: Hindawi journal article supplement (doi:10.1155/2020/8068414), 2020-05-19
Supplement: f1 [file 8068414.f1.zip › supplementary files/Matlab_code_for_Figure1/BER_by_Simulation/实际码字结果/AWGN_dist2019298_K10000_S_part3.txt]

20190612²âÊÔËõÐ¡ÄÚÂëÊä³öLLRÐ§¹û£¬ÇÒËõ¼õÒò×ÓÎª

zoom_in =

     1


rho =

     0


sigma_n_2 =

   0.954529000000000


sigma_vec =

   Inf


overhead_vec =

   1.150000000000000


dist_num =

     2.019298000000000e+03

µ±Ç°ÐÅµÀÎªPBIÐÅµÀ
K =

       10000


out_node_degree =

  1 ÖÁ 5 ÁÐ

                   0                   0                   0                   0                   0

  6 ÖÁ 10 ÁÐ

   0.846815465372582   0.045038486769935                   0                   0                   0

  11 ÖÁ 15 ÁÐ

                   0                   0                   0                   0                   0

  16 ÖÁ 20 ÁÐ

                   0                   0                   0                   0                   0

  21 ÖÁ 25 ÁÐ

                   0                   0                   0                   0                   0

  26 ÖÁ 30 ÁÐ

                   0                   0                   0                   0                   0

  31 ÖÁ 35 ÁÐ

                   0                   0                   0                   0                   0

  36 ÖÁ 39 ÁÐ

                   0                   0   0.000613563333579   0.107532484523904

ÕýÔÚ¶ÔÍâÂë½øÐÐÏßÐÔPEG±àÂë£¬ÇëÉÔµÈ...
µ±Ç°Ñ¡ÔñµÄÊÇÏµÍ³Âë
LTÂë£¬µ±Ç°¿ªÏú=1.15,µ±Ç°Ö¡ÊýÎª50, ÎóÖ¡ÂÊPER=1.00000e+00,ÎóÂëÂÊBER=2.54018e-03
RaptorÂë£¬µ±Ç°¿ªÏú=1.15,µ±Ç°Ö¡ÊýÎª50, ÎóÖ¡ÂÊPER=2.00000e-02,ÎóÂëÂÊBER=1.07600e-03
LTÂë£¬µ±Ç°¿ªÏú=1.15,µ±Ç°Ö¡ÊýÎª100, ÎóÖ¡ÂÊPER=1.00000e+00,ÎóÂëÂÊBER=3.42807e-03
RaptorÂë£¬µ±Ç°¿ªÏú=1.15,µ±Ç°Ö¡ÊýÎª100, ÎóÖ¡ÂÊPER=4.00000e-02,ÎóÂëÂÊBER=2.01600e-03
LTÂë£¬µ±Ç°¿ªÏú=1.15,µ±Ç°Ö¡ÊýÎª150, ÎóÖ¡ÂÊPER=1.00000e+00,ÎóÂëÂÊBER=4.16699e-03
RaptorÂë£¬µ±Ç°¿ªÏú=1.15,µ±Ç°Ö¡ÊýÎª150, ÎóÖ¡ÂÊPER=5.33333e-02,ÎóÂëÂÊBER=2.82600e-03
LTÂë£¬µ±Ç°¿ªÏú=1.15,µ±Ç°Ö¡ÊýÎª200, ÎóÖ¡ÂÊPER=1.00000e+00,ÎóÂëÂÊBER=4.73589e-03
RaptorÂë£¬µ±Ç°¿ªÏú=1.15,µ±Ç°Ö¡ÊýÎª200, ÎóÖ¡ÂÊPER=6.00000e-02,ÎóÂëÂÊBER=3.37250e-03
LTÂë£¬µ±Ç°¿ªÏú=1.15,µ±Ç°Ö¡ÊýÎª250, ÎóÖ¡ÂÊPER=1.00000e+00,ÎóÂëÂÊBER=5.00431e-03
RaptorÂë£¬µ±Ç°¿ªÏú=1.15,µ±Ç°Ö¡ÊýÎª250, ÎóÖ¡ÂÊPER=6.80000e-02,ÎóÂëÂÊBER=3.65960e-03
LTÂë£¬µ±Ç°¿ªÏú=1.15,µ±Ç°Ö¡ÊýÎª300, ÎóÖ¡ÂÊPER=1.00000e+00,ÎóÂëÂÊBER=4.52045e-03
RaptorÂë£¬µ±Ç°¿ªÏú=1.15,µ±Ç°Ö¡ÊýÎª300, ÎóÖ¡ÂÊPER=6.00000e-02,ÎóÂëÂÊBER=3.16000e-03
LTÂë£¬µ±Ç°¿ªÏú=1.15,µ±Ç°Ö¡ÊýÎª350, ÎóÖ¡ÂÊPER=1.00000e+00,ÎóÂëÂÊBER=4.08327e-03
RaptorÂë£¬µ±Ç°¿ªÏú=1.15,µ±Ç°Ö¡ÊýÎª350, ÎóÖ¡ÂÊPER=5.42857e-02,ÎóÂëÂÊBER=2.71429e-03
LTÂë£¬µ±Ç°¿ªÏú=1.15,µ±Ç°Ö¡ÊýÎª400, ÎóÖ¡ÂÊPER=1.00000e+00,ÎóÂëÂÊBER=3.90803e-03
RaptorÂë£¬µ±Ç°¿ªÏú=1.15,µ±Ç°Ö¡ÊýÎª400, ÎóÖ¡ÂÊPER=5.00000e-02,ÎóÂëÂÊBER=2.54175e-03
LTÂë£¬µ±Ç°¿ªÏú=1.15,µ±Ç°Ö¡ÊýÎª450, ÎóÖ¡ÂÊPER=1.00000e+00,ÎóÂëÂÊBER=3.91568e-03
RaptorÂë£¬µ±Ç°¿ªÏú=1.15,µ±Ç°Ö¡ÊýÎª450, ÎóÖ¡ÂÊPER=4.88889e-02,ÎóÂëÂÊBER=2.55778e-03
LTÂë£¬µ±Ç°¿ªÏú=1.15,µ±Ç°Ö¡ÊýÎª500, ÎóÖ¡ÂÊPER=1.00000e+00,ÎóÂëÂÊBER=3.83810e-03
RaptorÂë£¬µ±Ç°¿ªÏú=1.15,µ±Ç°Ö¡ÊýÎª500, ÎóÖ¡ÂÊPER=4.60000e-02,ÎóÂëÂÊBER=2.47120e-03
LTÂë£¬µ±Ç°¿ªÏú=1.15,µ±Ç°Ö¡ÊýÎª550, ÎóÖ¡ÂÊPER=1.00000e+00,ÎóÂëÂÊBER=3.90257e-03
RaptorÂë£¬µ±Ç°¿ªÏú=1.15,µ±Ç°Ö¡ÊýÎª550, ÎóÖ¡ÂÊPER=4.72727e-02,ÎóÂëÂÊBER=2.54800e-03
LTÂë£¬µ±Ç°¿ªÏú=1.15,µ±Ç°Ö¡ÊýÎª600, ÎóÖ¡ÂÊPER=1.00000e+00,ÎóÂëÂÊBER=3.96234e-03
RaptorÂë£¬µ±Ç°¿ªÏú=1.15,µ±Ç°Ö¡ÊýÎª600, ÎóÖ¡ÂÊPER=4.66667e-02,ÎóÂëÂÊBER=2.61117e-03
LTÂë£¬µ±Ç°¿ªÏú=1.15,µ±Ç°Ö¡ÊýÎª650, ÎóÖ¡ÂÊPER=1.00000e+00,ÎóÂëÂÊBER=3.89787e-03
RaptorÂë£¬µ±Ç°¿ªÏú=1.15,µ±Ç°Ö¡ÊýÎª650, ÎóÖ¡ÂÊPER=4.46154e-02,ÎóÂëÂÊBER=2.55400e-03
LTÂë£¬µ±Ç°¿ªÏú=1.15,µ±Ç°Ö¡ÊýÎª700, ÎóÖ¡ÂÊPER=1.00000e+00,ÎóÂëÂÊBER=3.88755e-03
RaptorÂë£¬µ±Ç°¿ªÏú=1.15,µ±Ç°Ö¡ÊýÎª700, ÎóÖ¡ÂÊPER=4.28571e-02,ÎóÂëÂÊBER=2.53800e-03
LTÂë£¬µ±Ç°¿ªÏú=1.15,µ±Ç°Ö¡ÊýÎª750, ÎóÖ¡ÂÊPER=1.00000e+00,ÎóÂëÂÊBER=3.85117e-03
RaptorÂë£¬µ±Ç°¿ªÏú=1.15,µ±Ç°Ö¡ÊýÎª750, ÎóÖ¡ÂÊPER=4.13333e-02,ÎóÂëÂÊBER=2.49613e-03
LTÂë£¬µ±Ç°¿ªÏú=1.15,µ±Ç°Ö¡ÊýÎª800, ÎóÖ¡ÂÊPER=1.00000e+00,ÎóÂëÂÊBER=3.79912e-03
RaptorÂë£¬µ±Ç°¿ªÏú=1.15,µ±Ç°Ö¡ÊýÎª800, ÎóÖ¡ÂÊPER=4.00000e-02,ÎóÂëÂÊBER=2.44638e-03
LTÂë£¬µ±Ç°¿ªÏú=1.15,µ±Ç°Ö¡ÊýÎª850, ÎóÖ¡ÂÊPER=1.00000e+00,ÎóÂëÂÊBER=3.78168e-03
RaptorÂë£¬µ±Ç°¿ªÏú=1.15,µ±Ç°Ö¡ÊýÎª850, ÎóÖ¡ÂÊPER=3.88235e-02,ÎóÂëÂÊBER=2.43294e-03
LTÂë£¬µ±Ç°¿ªÏú=1.15,µ±Ç°Ö¡ÊýÎª900, ÎóÖ¡ÂÊPER=1.00000e+00,ÎóÂëÂÊBER=4.01302e-03
RaptorÂë£¬µ±Ç°¿ªÏú=1.15,µ±Ç°Ö¡ÊýÎª900, ÎóÖ¡ÂÊPER=4.11111e-02,ÎóÂëÂÊBER=2.66122e-03
LTÂë£¬µ±Ç°¿ªÏú=1.15,µ±Ç°Ö¡ÊýÎª950, ÎóÖ¡ÂÊPER=1.00000e+00,ÎóÂëÂÊBER=4.03041e-03
RaptorÂë£¬µ±Ç°¿ªÏú=1.15,µ±Ç°Ö¡ÊýÎª950, ÎóÖ¡ÂÊPER=4.10526e-02,ÎóÂëÂÊBER=2.67168e-03
LTÂë£¬µ±Ç°¿ªÏú=1.15,µ±Ç°Ö¡ÊýÎª1000, ÎóÖ¡ÂÊPER=1.00000e+00,ÎóÂëÂÊBER=4.01068e-03
RaptorÂë£¬µ±Ç°¿ªÏú=1.15,µ±Ç°Ö¡ÊýÎª1000, ÎóÖ¡ÂÊPER=4.00000e-02,ÎóÂëÂÊBER=2.65390e-03
LTÂë£¬µ±Ç°¿ªÏú=1.15,µ±Ç°Ö¡ÊýÎª1050, ÎóÖ¡ÂÊPER=1.00000e+00,ÎóÂëÂÊBER=3.97230e-03
RaptorÂë£¬µ±Ç°¿ªÏú=1.15,µ±Ç°Ö¡ÊýÎª1050, ÎóÖ¡ÂÊPER=4.00000e-02,ÎóÂëÂÊBER=2.61438e-03
LTÂë£¬µ±Ç°¿ªÏú=1.15,µ±Ç°Ö¡ÊýÎª1100, ÎóÖ¡ÂÊPER=1.00000e+00,ÎóÂëÂÊBER=3.94827e-03
RaptorÂë£¬µ±Ç°¿ªÏú=1.15,µ±Ç°Ö¡ÊýÎª1100, ÎóÖ¡ÂÊPER=4.00000e-02,ÎóÂëÂÊBER=2.58800e-03
LTÂë£¬µ±Ç°¿ªÏú=1.15,µ±Ç°Ö¡ÊýÎª1150, ÎóÖ¡ÂÊPER=1.00000e+00,ÎóÂëÂÊBER=4.06013e-03
RaptorÂë£¬µ±Ç°¿ªÏú=1.15,µ±Ç°Ö¡ÊýÎª1150, ÎóÖ¡ÂÊPER=4.17391e-02,ÎóÂëÂÊBER=2.69878e-03
LTÂë£¬µ±Ç°¿ªÏú=1.15,µ±Ç°Ö¡ÊýÎª1200, ÎóÖ¡ÂÊPER=1.00000e+00,ÎóÂëÂÊBER=3.94657e-03
RaptorÂë£¬µ±Ç°¿ªÏú=1.15,µ±Ç°Ö¡ÊýÎª1200, ÎóÖ¡ÂÊPER=4.08333e-02,ÎóÂëÂÊBER=2.58717e-03
´íÎó±ÈÌØÊýºÍÖ¡Êý¶¼´ïµ½Ò»¶¨Á¿£¬ÐèÒªÔö¼Ó¿ªÏú
µ±Ç°ÐÅµÀ±ê×¼²î=100.00,¿ªÏú=1.15,µ±Ç°Ö¡ÊýÎª1233, LTÂëÎóÂëÂÊBER_LT=3.96057e-03,RaptorÎóÂëÂÊBER=2.59408e-03
ÐÅµÀ±ê×¼²î·¶Î§Îª£º
Inf  
¿ªÏú·¶Î§Îª£º
1.15  
LTÎóÂëÂÊBER_LTÎª£º
3.96057e-03  
RaptorÎóÂëÂÊBERÎª£º
2.59408e-03  
Ê±¼äÒÑ¹ý 56574.012993 Ãë¡£
