# Supplementary material for: An Efficient Design of Systematic Rateless Codes
Source: Hindawi journal article supplement (doi:10.1155/2020/8068414), 2020-05-19
Supplement: f1 [file 8068414.f1.zip › supplementary files/Matlab_code_for_Figure1/BER_by_Simulation/实际码字结果/AWGN_dist201912973_K10000_S.txt]

20190612²âÊÔËõÐ¡ÄÚÂëÊä³öLLRÐ§¹û£¬ÇÒËõ¼õÒò×ÓÎª

zoom_in =

     1


rho =

     0


sigma_n_2 =

   1.682987290000000


sigma_vec =

   Inf


dist_num =

     2.019129730000000e+03

µ±Ç°ÐÅµÀÎªPBIÐÅµÀ
K =

       10000


out_node_index =

     4     5    29    30    53


out_node_degree =

  Columns 1 through 9

                   0                   0                   0   0.355538974043615   0.527142836695387                   0                   0                   0                   0

  Columns 10 through 18

                   0                   0                   0                   0                   0                   0                   0                   0                   0

  Columns 19 through 27

                   0                   0                   0                   0                   0                   0                   0                   0                   0

  Columns 28 through 36

                   0   0.052969107381124   0.045664199135624                   0                   0                   0                   0                   0                   0

  Columns 37 through 45

                   0                   0                   0                   0                   0                   0                   0                   0                   0

  Columns 46 through 53

                   0                   0                   0                   0                   0                   0                   0   0.018684882744250

ÕýÔÚ¶ÔÍâÂë½øÐÐÏßÐÔPEG±àÂë£¬ÇëÉÔµÈ...
µ±Ç°Ñ¡ÔñµÄÊÇÏµÍ³Âë
´íÎó±ÈÌØÊýºÍÖ¡Êý¶¼´ïµ½Ò»¶¨Á¿£¬ÐèÒªÔö¼Ó¿ªÏú
µ±Ç°ÐÅµÀ±ê×¼²î=100.00,¿ªÏú=2.00,µ±Ç°Ö¡ÊýÎª20, LTÂëÎóÂëÂÊBER_LT=1.69688e-01,RaptorÎóÂëÂÊBER=1.69845e-01
´íÎó±ÈÌØÊýºÍÖ¡Êý¶¼´ïµ½Ò»¶¨Á¿£¬ÐèÒªÔö¼Ó¿ªÏú
µ±Ç°ÐÅµÀ±ê×¼²î=100.00,¿ªÏú=2.10,µ±Ç°Ö¡ÊýÎª20, LTÂëÎóÂëÂÊBER_LT=1.26627e-01,RaptorÎóÂëÂÊBER=1.26405e-01
LTÂë£¬µ±Ç°¿ªÏú=2.20,µ±Ç°Ö¡ÊýÎª50, ÎóÖ¡ÂÊPER=1.00000e+00,ÎóÂëÂÊBER=4.19737e-02
RaptorÂë£¬µ±Ç°¿ªÏú=2.20,µ±Ç°Ö¡ÊýÎª50, ÎóÖ¡ÂÊPER=3.00000e-01,ÎóÂëÂÊBER=4.07320e-02
´íÎó±ÈÌØÊýºÍÖ¡Êý¶¼´ïµ½Ò»¶¨Á¿£¬ÐèÒªÔö¼Ó¿ªÏú
µ±Ç°ÐÅµÀ±ê×¼²î=100.00,¿ªÏú=2.20,µ±Ç°Ö¡ÊýÎª64, LTÂëÎóÂëÂÊBER_LT=3.86904e-02,RaptorÎóÂëÂÊBER=3.73703e-02
LTÂë£¬µ±Ç°¿ªÏú=2.30,µ±Ç°Ö¡ÊýÎª50, ÎóÖ¡ÂÊPER=1.00000e+00,ÎóÂëÂÊBER=7.28538e-03
RaptorÂë£¬µ±Ç°¿ªÏú=2.30,µ±Ç°Ö¡ÊýÎª50, ÎóÖ¡ÂÊPER=6.00000e-02,ÎóÂëÂÊBER=6.17200e-03
LTÂë£¬µ±Ç°¿ªÏú=2.30,µ±Ç°Ö¡ÊýÎª100, ÎóÖ¡ÂÊPER=1.00000e+00,ÎóÂëÂÊBER=9.98824e-03
RaptorÂë£¬µ±Ç°¿ªÏú=2.30,µ±Ç°Ö¡ÊýÎª100, ÎóÖ¡ÂÊPER=8.00000e-02,ÎóÂëÂÊBER=8.87100e-03
LTÂë£¬µ±Ç°¿ªÏú=2.30,µ±Ç°Ö¡ÊýÎª150, ÎóÖ¡ÂÊPER=1.00000e+00,ÎóÂëÂÊBER=1.03456e-02
RaptorÂë£¬µ±Ç°¿ªÏú=2.30,µ±Ç°Ö¡ÊýÎª150, ÎóÖ¡ÂÊPER=8.00000e-02,ÎóÂëÂÊBER=9.19267e-03
LTÂë£¬µ±Ç°¿ªÏú=2.30,µ±Ç°Ö¡ÊýÎª200, ÎóÖ¡ÂÊPER=1.00000e+00,ÎóÂëÂÊBER=9.73687e-03
RaptorÂë£¬µ±Ç°¿ªÏú=2.30,µ±Ç°Ö¡ÊýÎª200, ÎóÖ¡ÂÊPER=7.50000e-02,ÎóÂëÂÊBER=8.53200e-03
´íÎó±ÈÌØÊýºÍÖ¡Êý¶¼´ïµ½Ò»¶¨Á¿£¬ÐèÒªÔö¼Ó¿ªÏú
µ±Ç°ÐÅµÀ±ê×¼²î=100.00,¿ªÏú=2.30,µ±Ç°Ö¡ÊýÎª249, LTÂëÎóÂëÂÊBER_LT=1.02924e-02,RaptorÎóÂëÂÊBER=9.09639e-03
{²Ù×÷ÔÚÒÔÏÂ¹ý³ÌÖÐ±»ÓÃ»§ÖÕÖ¹ <a href="matlab:helpUtils.errorDocCallback('sys_LT_Log_SP_decode', 'D:\ËÑ¹·¸ßËÙÏÂÔØ\³ÌÐò0805\Êµ¼ÊÂë×ÖÐÔÄÜ·ÂÕæ\sys_LT_Log_SP_decode.m', 50)" style="font-weight:bold">sys_LT_Log_SP_decode</a> (<a href="matlab: opentoline('D:\ËÑ¹·¸ßËÙÏÂÔØ\³ÌÐò0805\Êµ¼ÊÂë×ÖÐÔÄÜ·ÂÕæ\sys_LT_Log_SP_decode.m',50,0)">line 50</a>)


Î»ÖÃ <a href="matlab:helpUtils.errorDocCallback('Main_Raptor_enc_dec', 'D:\ËÑ¹·¸ßËÙÏÂÔØ\³ÌÐò0805\Êµ¼ÊÂë×ÖÐÔÄÜ·ÂÕæ\Main_Raptor_enc_dec.m', 220)" style="font-weight:bold">Main_Raptor_enc_dec</a> (<a href="matlab: opentoline('D:\ËÑ¹·¸ßËÙÏÂÔØ\³ÌÐò0805\Êµ¼ÊÂë×ÖÐÔÄÜ·ÂÕæ\Main_Raptor_enc_dec.m',220,0)">line 220</a>)
            [d_code,success_LT,soft_LT_msg,k] = sys_LT_Log_SP_decode(L_rate,H,iter_num_LT);
} 
toc;diary off;
Ê±¼äÒÑ¹ý 33779.159631 Ãë¡£
