# Supplementary material for: An Efficient Design of Systematic Rateless Codes
Source: Hindawi journal article supplement (doi:10.1155/2020/8068414), 2020-05-19
Supplement: f1 [file 8068414.f1.zip › supplementary files/Matlab_code_for_Figure1/BER_by_Simulation/实际码字结果/AWGN_dist201912973_K10000_S_iter100.txt]

20190612²âÊÔËõÐ¡ÄÚÂëÊä³öLLRÐ§¹û£¬ÇÒËõ¼õÒò×ÓÎª

zoom_in =

     1


rho =

     0


sigma_n_2 =

   1.682987290000000


sigma_vec =

   Inf


dist_num =

     2.019129730000000e+03

µ±Ç°ÐÅµÀÎªPBIÐÅµÀ
K =

       10000


out_node_index =

     4     5    29    30    53


out_node_degree =

  Columns 1 through 9

                   0                   0                   0   0.355538974043615   0.527142836695387                   0                   0                   0                   0

  Columns 10 through 18

                   0                   0                   0                   0                   0                   0                   0                   0                   0

  Columns 19 through 27

                   0                   0                   0                   0                   0                   0                   0                   0                   0

  Columns 28 through 36

                   0   0.052969107381124   0.045664199135624                   0                   0                   0                   0                   0                   0

  Columns 37 through 45

                   0                   0                   0                   0                   0                   0                   0                   0                   0

  Columns 46 through 53

                   0                   0                   0                   0                   0                   0                   0   0.018684882744250

ÕýÔÚ¶ÔÍâÂë½øÐÐÏßÐÔPEG±àÂë£¬ÇëÉÔµÈ...
µ±Ç°Ñ¡ÔñµÄÊÇÏµÍ³Âë
LTÂë£¬µ±Ç°¿ªÏú=2.30,µ±Ç°Ö¡ÊýÎª50, ÎóÖ¡ÂÊPER=1.00000e+00,ÎóÂëÂÊBER=4.65896e-03
RaptorÂë£¬µ±Ç°¿ªÏú=2.30,µ±Ç°Ö¡ÊýÎª50, ÎóÖ¡ÂÊPER=2.00000e-02,ÎóÂëÂÊBER=3.47400e-03
LTÂë£¬µ±Ç°¿ªÏú=2.30,µ±Ç°Ö¡ÊýÎª100, ÎóÖ¡ÂÊPER=1.00000e+00,ÎóÂëÂÊBER=2.99490e-03
RaptorÂë£¬µ±Ç°¿ªÏú=2.30,µ±Ç°Ö¡ÊýÎª100, ÎóÖ¡ÂÊPER=1.00000e-02,ÎóÂëÂÊBER=1.73700e-03
LTÂë£¬µ±Ç°¿ªÏú=2.30,µ±Ç°Ö¡ÊýÎª150, ÎóÖ¡ÂÊPER=1.00000e+00,ÎóÂëÂÊBER=3.53260e-03
RaptorÂë£¬µ±Ç°¿ªÏú=2.30,µ±Ç°Ö¡ÊýÎª150, ÎóÖ¡ÂÊPER=1.33333e-02,ÎóÂëÂÊBER=2.27733e-03
LTÂë£¬µ±Ç°¿ªÏú=2.30,µ±Ç°Ö¡ÊýÎª200, ÎóÖ¡ÂÊPER=1.00000e+00,ÎóÂëÂÊBER=4.54920e-03
RaptorÂë£¬µ±Ç°¿ªÏú=2.30,µ±Ç°Ö¡ÊýÎª200, ÎóÖ¡ÂÊPER=2.00000e-02,ÎóÂëÂÊBER=3.30750e-03
LTÂë£¬µ±Ç°¿ªÏú=2.30,µ±Ç°Ö¡ÊýÎª250, ÎóÖ¡ÂÊPER=1.00000e+00,ÎóÂëÂÊBER=4.41709e-03
RaptorÂë£¬µ±Ç°¿ªÏú=2.30,µ±Ç°Ö¡ÊýÎª250, ÎóÖ¡ÂÊPER=2.00000e-02,ÎóÂëÂÊBER=3.17800e-03
LTÂë£¬µ±Ç°¿ªÏú=2.30,µ±Ç°Ö¡ÊýÎª300, ÎóÖ¡ÂÊPER=1.00000e+00,ÎóÂëÂÊBER=4.33882e-03
RaptorÂë£¬µ±Ç°¿ªÏú=2.30,µ±Ç°Ö¡ÊýÎª300, ÎóÖ¡ÂÊPER=2.00000e-02,ÎóÂëÂÊBER=3.08867e-03
LTÂë£¬µ±Ç°¿ªÏú=2.30,µ±Ç°Ö¡ÊýÎª350, ÎóÖ¡ÂÊPER=1.00000e+00,ÎóÂëÂÊBER=3.90715e-03
RaptorÂë£¬µ±Ç°¿ªÏú=2.30,µ±Ç°Ö¡ÊýÎª350, ÎóÖ¡ÂÊPER=1.71429e-02,ÎóÂëÂÊBER=2.64743e-03
LTÂë£¬µ±Ç°¿ªÏú=2.30,µ±Ç°Ö¡ÊýÎª400, ÎóÖ¡ÂÊPER=1.00000e+00,ÎóÂëÂÊBER=3.89970e-03
RaptorÂë£¬µ±Ç°¿ªÏú=2.30,µ±Ç°Ö¡ÊýÎª400, ÎóÖ¡ÂÊPER=1.75000e-02,ÎóÂëÂÊBER=2.62850e-03
LTÂë£¬µ±Ç°¿ªÏú=2.30,µ±Ç°Ö¡ÊýÎª450, ÎóÖ¡ÂÊPER=1.00000e+00,ÎóÂëÂÊBER=4.36038e-03
RaptorÂë£¬µ±Ç°¿ªÏú=2.30,µ±Ç°Ö¡ÊýÎª450, ÎóÖ¡ÂÊPER=2.00000e-02,ÎóÂëÂÊBER=3.09956e-03
LTÂë£¬µ±Ç°¿ªÏú=2.30,µ±Ç°Ö¡ÊýÎª500, ÎóÖ¡ÂÊPER=1.00000e+00,ÎóÂëÂÊBER=5.05253e-03
RaptorÂë£¬µ±Ç°¿ªÏú=2.30,µ±Ç°Ö¡ÊýÎª500, ÎóÖ¡ÂÊPER=2.40000e-02,ÎóÂëÂÊBER=3.80340e-03
µ±Ç°ÐÅµÀ±ê×¼²î=100.00,¿ªÏú=2.30,µ±Ç°Ö¡ÊýÎª500, LTÂëÎóÂëÂÊBER_LT=5.05253e-03,RaptorÎóÂëÂÊBER=3.80340e-03
LTÂë£¬µ±Ç°¿ªÏú=2.40,µ±Ç°Ö¡ÊýÎª50, ÎóÖ¡ÂÊPER=1.00000e+00,ÎóÂëÂÊBER=9.05527e-04
RaptorÂë£¬µ±Ç°¿ªÏú=2.40,µ±Ç°Ö¡ÊýÎª50, ÎóÖ¡ÂÊPER=0.00000e+00,ÎóÂëÂÊBER=0.00000e+00
LTÂë£¬µ±Ç°¿ªÏú=2.40,µ±Ç°Ö¡ÊýÎª100, ÎóÖ¡ÂÊPER=1.00000e+00,ÎóÂëÂÊBER=9.52568e-04
RaptorÂë£¬µ±Ç°¿ªÏú=2.40,µ±Ç°Ö¡ÊýÎª100, ÎóÖ¡ÂÊPER=0.00000e+00,ÎóÂëÂÊBER=0.00000e+00
LTÂë£¬µ±Ç°¿ªÏú=2.40,µ±Ç°Ö¡ÊýÎª150, ÎóÖ¡ÂÊPER=1.00000e+00,ÎóÂëÂÊBER=9.27741e-04
RaptorÂë£¬µ±Ç°¿ªÏú=2.40,µ±Ç°Ö¡ÊýÎª150, ÎóÖ¡ÂÊPER=0.00000e+00,ÎóÂëÂÊBER=0.00000e+00
LTÂë£¬µ±Ç°¿ªÏú=2.40,µ±Ç°Ö¡ÊýÎª200, ÎóÖ¡ÂÊPER=1.00000e+00,ÎóÂëÂÊBER=1.76695e-03
RaptorÂë£¬µ±Ç°¿ªÏú=2.40,µ±Ç°Ö¡ÊýÎª200, ÎóÖ¡ÂÊPER=5.00000e-03,ÎóÂëÂÊBER=8.67000e-04
LTÂë£¬µ±Ç°¿ªÏú=2.40,µ±Ç°Ö¡ÊýÎª250, ÎóÖ¡ÂÊPER=1.00000e+00,ÎóÂëÂÊBER=1.60133e-03
RaptorÂë£¬µ±Ç°¿ªÏú=2.40,µ±Ç°Ö¡ÊýÎª250, ÎóÖ¡ÂÊPER=4.00000e-03,ÎóÂëÂÊBER=6.93600e-04
LTÂë£¬µ±Ç°¿ªÏú=2.40,µ±Ç°Ö¡ÊýÎª300, ÎóÖ¡ÂÊPER=1.00000e+00,ÎóÂëÂÊBER=1.48929e-03
RaptorÂë£¬µ±Ç°¿ªÏú=2.40,µ±Ç°Ö¡ÊýÎª300, ÎóÖ¡ÂÊPER=3.33333e-03,ÎóÂëÂÊBER=5.78000e-04
LTÂë£¬µ±Ç°¿ªÏú=2.40,µ±Ç°Ö¡ÊýÎª350, ÎóÖ¡ÂÊPER=1.00000e+00,ÎóÂëÂÊBER=1.61589e-03
RaptorÂë£¬µ±Ç°¿ªÏú=2.40,µ±Ç°Ö¡ÊýÎª350, ÎóÖ¡ÂÊPER=5.71429e-03,ÎóÂëÂÊBER=7.04571e-04
LTÂë£¬µ±Ç°¿ªÏú=2.40,µ±Ç°Ö¡ÊýÎª400, ÎóÖ¡ÂÊPER=1.00000e+00,ÎóÂëÂÊBER=1.52734e-03
RaptorÂë£¬µ±Ç°¿ªÏú=2.40,µ±Ç°Ö¡ÊýÎª400, ÎóÖ¡ÂÊPER=5.00000e-03,ÎóÂëÂÊBER=6.16500e-04
LTÂë£¬µ±Ç°¿ªÏú=2.40,µ±Ç°Ö¡ÊýÎª450, ÎóÖ¡ÂÊPER=1.00000e+00,ÎóÂëÂÊBER=1.45825e-03
RaptorÂë£¬µ±Ç°¿ªÏú=2.40,µ±Ç°Ö¡ÊýÎª450, ÎóÖ¡ÂÊPER=4.44444e-03,ÎóÂëÂÊBER=5.48000e-04
LTÂë£¬µ±Ç°¿ªÏú=2.40,µ±Ç°Ö¡ÊýÎª500, ÎóÖ¡ÂÊPER=1.00000e+00,ÎóÂëÂÊBER=1.39886e-03
RaptorÂë£¬µ±Ç°¿ªÏú=2.40,µ±Ç°Ö¡ÊýÎª500, ÎóÖ¡ÂÊPER=4.00000e-03,ÎóÂëÂÊBER=4.93200e-04
µ±Ç°ÐÅµÀ±ê×¼²î=100.00,¿ªÏú=2.40,µ±Ç°Ö¡ÊýÎª500, LTÂëÎóÂëÂÊBER_LT=1.39886e-03,RaptorÎóÂëÂÊBER=4.93200e-04
LTÂë£¬µ±Ç°¿ªÏú=2.50,µ±Ç°Ö¡ÊýÎª50, ÎóÖ¡ÂÊPER=1.00000e+00,ÎóÂëÂÊBER=7.01686e-04
RaptorÂë£¬µ±Ç°¿ªÏú=2.50,µ±Ç°Ö¡ÊýÎª50, ÎóÖ¡ÂÊPER=0.00000e+00,ÎóÂëÂÊBER=0.00000e+00
LTÂë£¬µ±Ç°¿ªÏú=2.50,µ±Ç°Ö¡ÊýÎª100, ÎóÖ¡ÂÊPER=1.00000e+00,ÎóÂëÂÊBER=6.52685e-04
RaptorÂë£¬µ±Ç°¿ªÏú=2.50,µ±Ç°Ö¡ÊýÎª100, ÎóÖ¡ÂÊPER=0.00000e+00,ÎóÂëÂÊBER=0.00000e+00
LTÂë£¬µ±Ç°¿ªÏú=2.50,µ±Ç°Ö¡ÊýÎª150, ÎóÖ¡ÂÊPER=9.93333e-01,ÎóÂëÂÊBER=6.59219e-04
RaptorÂë£¬µ±Ç°¿ªÏú=2.50,µ±Ç°Ö¡ÊýÎª150, ÎóÖ¡ÂÊPER=0.00000e+00,ÎóÂëÂÊBER=0.00000e+00
LTÂë£¬µ±Ç°¿ªÏú=2.50,µ±Ç°Ö¡ÊýÎª200, ÎóÖ¡ÂÊPER=9.90000e-01,ÎóÂëÂÊBER=6.66405e-04
RaptorÂë£¬µ±Ç°¿ªÏú=2.50,µ±Ç°Ö¡ÊýÎª200, ÎóÖ¡ÂÊPER=0.00000e+00,ÎóÂëÂÊBER=0.00000e+00
LTÂë£¬µ±Ç°¿ªÏú=2.50,µ±Ç°Ö¡ÊýÎª250, ÎóÖ¡ÂÊPER=9.92000e-01,ÎóÂëÂÊBER=6.60133e-04
RaptorÂë£¬µ±Ç°¿ªÏú=2.50,µ±Ç°Ö¡ÊýÎª250, ÎóÖ¡ÂÊPER=0.00000e+00,ÎóÂëÂÊBER=0.00000e+00
LTÂë£¬µ±Ç°¿ªÏú=2.50,µ±Ç°Ö¡ÊýÎª300, ÎóÖ¡ÂÊPER=9.93333e-01,ÎóÂëÂÊBER=6.73919e-04
RaptorÂë£¬µ±Ç°¿ªÏú=2.50,µ±Ç°Ö¡ÊýÎª300, ÎóÖ¡ÂÊPER=0.00000e+00,ÎóÂëÂÊBER=0.00000e+00
LTÂë£¬µ±Ç°¿ªÏú=2.50,µ±Ç°Ö¡ÊýÎª350, ÎóÖ¡ÂÊPER=9.94286e-01,ÎóÂëÂÊBER=6.74525e-04
RaptorÂë£¬µ±Ç°¿ªÏú=2.50,µ±Ç°Ö¡ÊýÎª350, ÎóÖ¡ÂÊPER=0.00000e+00,ÎóÂëÂÊBER=0.00000e+00
LTÂë£¬µ±Ç°¿ªÏú=2.50,µ±Ç°Ö¡ÊýÎª400, ÎóÖ¡ÂÊPER=9.95000e-01,ÎóÂëÂÊBER=6.79880e-04
RaptorÂë£¬µ±Ç°¿ªÏú=2.50,µ±Ç°Ö¡ÊýÎª400, ÎóÖ¡ÂÊPER=0.00000e+00,ÎóÂëÂÊBER=0.00000e+00
LTÂë£¬µ±Ç°¿ªÏú=2.50,µ±Ç°Ö¡ÊýÎª450, ÎóÖ¡ÂÊPER=9.95556e-01,ÎóÂëÂÊBER=6.84045e-04
RaptorÂë£¬µ±Ç°¿ªÏú=2.50,µ±Ç°Ö¡ÊýÎª450, ÎóÖ¡ÂÊPER=0.00000e+00,ÎóÂëÂÊBER=0.00000e+00
LTÂë£¬µ±Ç°¿ªÏú=2.50,µ±Ç°Ö¡ÊýÎª500, ÎóÖ¡ÂÊPER=9.96000e-01,ÎóÂëÂÊBER=6.90318e-04
RaptorÂë£¬µ±Ç°¿ªÏú=2.50,µ±Ç°Ö¡ÊýÎª500, ÎóÖ¡ÂÊPER=0.00000e+00,ÎóÂëÂÊBER=0.00000e+00
µ±Ç°ÐÅµÀ±ê×¼²î=100.00,¿ªÏú=2.50,µ±Ç°Ö¡ÊýÎª500, LTÂëÎóÂëÂÊBER_LT=6.90318e-04,RaptorÎóÂëÂÊBER=0.00000e+00
RaptorÎóÂëÂÊ´ïµ½ÒªÇó£¬²»ÔÙÔö¼ÓÐÅÔë±È
ÐÅµÀ±ê×¼²î·¶Î§Îª£º
Inf  
¿ªÏú·¶Î§Îª£º
2.30  2.40  2.50  2.60  2.70  2.80  
LTÎóÂëÂÊBER_LTÎª£º
5.05253e-03  1.39886e-03  6.90318e-04  0.00000e+00  0.00000e+00  0.00000e+00  
RaptorÎóÂëÂÊBERÎª£º
3.80340e-03  4.93200e-04  0.00000e+00  0.00000e+00  0.00000e+00  0.00000e+00  
Ê±¼äÒÑ¹ý 310318.181119 Ãë¡£
