# Supplementary material for: An Efficient Design of Systematic Rateless Codes
Source: Hindawi journal article supplement (doi:10.1155/2020/8068414), 2020-05-19
Supplement: f1 [file 8068414.f1.zip › supplementary files/Matlab_code_for_Figure1/BER_by_Simulation/实际码字结果/AWGN_dist201912973_K10000_S_iter100_part2.txt]

20190612²âÊÔËõÐ¡ÄÚÂëÊä³öLLRÐ§¹û£¬ÇÒËõ¼õÒò×ÓÎª

zoom_in =

     1


rho =

     0


sigma_n_2 =

   1.682987290000000


sigma_vec =

   Inf


dist_num =

     2.019129730000000e+03

µ±Ç°ÐÅµÀÎªPBIÐÅµÀ
K =

       10000


out_node_index =

     4     5    29    30    53


out_node_degree =

  Columns 1 through 9

                   0                   0                   0   0.355538974043615   0.527142836695387                   0                   0                   0                   0

  Columns 10 through 18

                   0                   0                   0                   0                   0                   0                   0                   0                   0

  Columns 19 through 27

                   0                   0                   0                   0                   0                   0                   0                   0                   0

  Columns 28 through 36

                   0   0.052969107381124   0.045664199135624                   0                   0                   0                   0                   0                   0

  Columns 37 through 45

                   0                   0                   0                   0                   0                   0                   0                   0                   0

  Columns 46 through 53

                   0                   0                   0                   0                   0                   0                   0   0.018684882744250

ÕýÔÚ¶ÔÍâÂë½øÐÐÏßÐÔPEG±àÂë£¬ÇëÉÔµÈ...
µ±Ç°Ñ¡ÔñµÄÊÇÏµÍ³Âë
LTÂë£¬µ±Ç°¿ªÏú=2.45,µ±Ç°Ö¡ÊýÎª50, ÎóÖ¡ÂÊPER=1.00000e+00,ÎóÂëÂÊBER=7.97726e-04
RaptorÂë£¬µ±Ç°¿ªÏú=2.45,µ±Ç°Ö¡ÊýÎª50, ÎóÖ¡ÂÊPER=0.00000e+00,ÎóÂëÂÊBER=0.00000e+00
LTÂë£¬µ±Ç°¿ªÏú=2.45,µ±Ç°Ö¡ÊýÎª100, ÎóÖ¡ÂÊPER=1.00000e+00,ÎóÂëÂÊBER=7.82046e-04
RaptorÂë£¬µ±Ç°¿ªÏú=2.45,µ±Ç°Ö¡ÊýÎª100, ÎóÖ¡ÂÊPER=0.00000e+00,ÎóÂëÂÊBER=0.00000e+00
LTÂë£¬µ±Ç°¿ªÏú=2.45,µ±Ç°Ö¡ÊýÎª150, ÎóÖ¡ÂÊPER=1.00000e+00,ÎóÂëÂÊBER=7.93153e-04
RaptorÂë£¬µ±Ç°¿ªÏú=2.45,µ±Ç°Ö¡ÊýÎª150, ÎóÖ¡ÂÊPER=0.00000e+00,ÎóÂëÂÊBER=0.00000e+00
LTÂë£¬µ±Ç°¿ªÏú=2.45,µ±Ç°Ö¡ÊýÎª200, ÎóÖ¡ÂÊPER=1.00000e+00,ÎóÂëÂÊBER=7.84006e-04
RaptorÂë£¬µ±Ç°¿ªÏú=2.45,µ±Ç°Ö¡ÊýÎª200, ÎóÖ¡ÂÊPER=0.00000e+00,ÎóÂëÂÊBER=0.00000e+00
LTÂë£¬µ±Ç°¿ªÏú=2.45,µ±Ç°Ö¡ÊýÎª250, ÎóÖ¡ÂÊPER=1.00000e+00,ÎóÂëÂÊBER=7.70286e-04
RaptorÂë£¬µ±Ç°¿ªÏú=2.45,µ±Ç°Ö¡ÊýÎª250, ÎóÖ¡ÂÊPER=0.00000e+00,ÎóÂëÂÊBER=0.00000e+00
LTÂë£¬µ±Ç°¿ªÏú=2.45,µ±Ç°Ö¡ÊýÎª300, ÎóÖ¡ÂÊPER=1.00000e+00,ÎóÂëÂÊBER=7.70613e-04
RaptorÂë£¬µ±Ç°¿ªÏú=2.45,µ±Ç°Ö¡ÊýÎª300, ÎóÖ¡ÂÊPER=0.00000e+00,ÎóÂëÂÊBER=0.00000e+00
LTÂë£¬µ±Ç°¿ªÏú=2.45,µ±Ç°Ö¡ÊýÎª350, ÎóÖ¡ÂÊPER=1.00000e+00,ÎóÂëÂÊBER=7.61046e-04
RaptorÂë£¬µ±Ç°¿ªÏú=2.45,µ±Ç°Ö¡ÊýÎª350, ÎóÖ¡ÂÊPER=0.00000e+00,ÎóÂëÂÊBER=0.00000e+00
LTÂë£¬µ±Ç°¿ªÏú=2.45,µ±Ç°Ö¡ÊýÎª400, ÎóÖ¡ÂÊPER=1.00000e+00,ÎóÂëÂÊBER=7.67101e-04
RaptorÂë£¬µ±Ç°¿ªÏú=2.45,µ±Ç°Ö¡ÊýÎª400, ÎóÖ¡ÂÊPER=0.00000e+00,ÎóÂëÂÊBER=0.00000e+00
LTÂë£¬µ±Ç°¿ªÏú=2.45,µ±Ç°Ö¡ÊýÎª450, ÎóÖ¡ÂÊPER=1.00000e+00,ÎóÂëÂÊBER=7.67891e-04
RaptorÂë£¬µ±Ç°¿ªÏú=2.45,µ±Ç°Ö¡ÊýÎª450, ÎóÖ¡ÂÊPER=0.00000e+00,ÎóÂëÂÊBER=0.00000e+00
LTÂë£¬µ±Ç°¿ªÏú=2.45,µ±Ç°Ö¡ÊýÎª500, ÎóÖ¡ÂÊPER=1.00000e+00,ÎóÂëÂÊBER=7.69306e-04
RaptorÂë£¬µ±Ç°¿ªÏú=2.45,µ±Ç°Ö¡ÊýÎª500, ÎóÖ¡ÂÊPER=0.00000e+00,ÎóÂëÂÊBER=0.00000e+00
µ±Ç°ÐÅµÀ±ê×¼²î=100.00,¿ªÏú=2.45,µ±Ç°Ö¡ÊýÎª500, LTÂëÎóÂëÂÊBER_LT=7.69306e-04,RaptorÎóÂëÂÊBER=0.00000e+00
RaptorÎóÂëÂÊ´ïµ½ÒªÇó£¬²»ÔÙÔö¼ÓÐÅÔë±È
ÐÅµÀ±ê×¼²î·¶Î§Îª£º
Inf  
¿ªÏú·¶Î§Îª£º
2.45  2.35  
LTÎóÂëÂÊBER_LTÎª£º
7.69306e-04  0.00000e+00  
RaptorÎóÂëÂÊBERÎª£º
0.00000e+00  0.00000e+00  
Ê±¼äÒÑ¹ý 108312.743471 Ãë¡£
