# Supplementary material for: An Efficient Design of Systematic Rateless Codes
Source: Hindawi journal article supplement (doi:10.1155/2020/8068414), 2020-05-19
Supplement: f1 [file 8068414.f1.zip › supplementary files/Matlab_code_for_Figure1/BER_by_Simulation/实际码字结果/AWGN_dist201912973_K10000_S_iter100_part3.txt]

20190612²âÊÔËõÐ¡ÄÚÂëÊä³öLLRÐ§¹û£¬ÇÒËõ¼õÒò×ÓÎª

zoom_in =

     1


rho =

     0


sigma_n_2 =

   1.682987290000000


sigma_vec =

   Inf


dist_num =

     2.019129730000000e+03

µ±Ç°ÐÅµÀÎªPBIÐÅµÀ
K =

       10000


out_node_index =

     4     5    29    30    53


out_node_degree =

  Columns 1 through 9

                   0                   0                   0   0.355538974043615   0.527142836695387                   0                   0                   0                   0

  Columns 10 through 18

                   0                   0                   0                   0                   0                   0                   0                   0                   0

  Columns 19 through 27

                   0                   0                   0                   0                   0                   0                   0                   0                   0

  Columns 28 through 36

                   0   0.052969107381124   0.045664199135624                   0                   0                   0                   0                   0                   0

  Columns 37 through 45

                   0                   0                   0                   0                   0                   0                   0                   0                   0

  Columns 46 through 53

                   0                   0                   0                   0                   0                   0                   0   0.018684882744250

ÕýÔÚ¶ÔÍâÂë½øÐÐÏßÐÔPEG±àÂë£¬ÇëÉÔµÈ...
µ±Ç°Ñ¡ÔñµÄÊÇÏµÍ³Âë
LTÂë£¬µ±Ç°¿ªÏú=2.35,µ±Ç°Ö¡ÊýÎª50, ÎóÖ¡ÂÊPER=1.00000e+00,ÎóÂëÂÊBER=4.25715e-03
RaptorÂë£¬µ±Ç°¿ªÏú=2.35,µ±Ç°Ö¡ÊýÎª50, ÎóÖ¡ÂÊPER=2.00000e-02,ÎóÂëÂÊBER=3.20200e-03
LTÂë£¬µ±Ç°¿ªÏú=2.35,µ±Ç°Ö¡ÊýÎª100, ÎóÖ¡ÂÊPER=1.00000e+00,ÎóÂëÂÊBER=2.69698e-03
RaptorÂë£¬µ±Ç°¿ªÏú=2.35,µ±Ç°Ö¡ÊýÎª100, ÎóÖ¡ÂÊPER=1.00000e-02,ÎóÂëÂÊBER=1.60100e-03
LTÂë£¬µ±Ç°¿ªÏú=2.35,µ±Ç°Ö¡ÊýÎª150, ÎóÖ¡ÂÊPER=1.00000e+00,ÎóÂëÂÊBER=2.15667e-03
RaptorÂë£¬µ±Ç°¿ªÏú=2.35,µ±Ç°Ö¡ÊýÎª150, ÎóÖ¡ÂÊPER=6.66667e-03,ÎóÂëÂÊBER=1.06733e-03
LTÂë£¬µ±Ç°¿ªÏú=2.35,µ±Ç°Ö¡ÊýÎª200, ÎóÖ¡ÂÊPER=1.00000e+00,ÎóÂëÂÊBER=1.89926e-03
RaptorÂë£¬µ±Ç°¿ªÏú=2.35,µ±Ç°Ö¡ÊýÎª200, ÎóÖ¡ÂÊPER=5.00000e-03,ÎóÂëÂÊBER=8.00500e-04
LTÂë£¬µ±Ç°¿ªÏú=2.35,µ±Ç°Ö¡ÊýÎª250, ÎóÖ¡ÂÊPER=1.00000e+00,ÎóÂëÂÊBER=1.74285e-03
RaptorÂë£¬µ±Ç°¿ªÏú=2.35,µ±Ç°Ö¡ÊýÎª250, ÎóÖ¡ÂÊPER=4.00000e-03,ÎóÂëÂÊBER=6.40400e-04
LTÂë£¬µ±Ç°¿ªÏú=2.35,µ±Ç°Ö¡ÊýÎª300, ÎóÖ¡ÂÊPER=1.00000e+00,ÎóÂëÂÊBER=1.64903e-03
RaptorÂë£¬µ±Ç°¿ªÏú=2.35,µ±Ç°Ö¡ÊýÎª300, ÎóÖ¡ÂÊPER=3.33333e-03,ÎóÂëÂÊBER=5.33667e-04
LTÂë£¬µ±Ç°¿ªÏú=2.35,µ±Ç°Ö¡ÊýÎª350, ÎóÖ¡ÂÊPER=1.00000e+00,ÎóÂëÂÊBER=1.99866e-03
RaptorÂë£¬µ±Ç°¿ªÏú=2.35,µ±Ç°Ö¡ÊýÎª350, ÎóÖ¡ÂÊPER=5.71429e-03,ÎóÂëÂÊBER=9.00286e-04
LTÂë£¬µ±Ç°¿ªÏú=2.35,µ±Ç°Ö¡ÊýÎª400, ÎóÖ¡ÂÊPER=1.00000e+00,ÎóÂëÂÊBER=2.28072e-03
RaptorÂë£¬µ±Ç°¿ªÏú=2.35,µ±Ç°Ö¡ÊýÎª400, ÎóÖ¡ÂÊPER=7.50000e-03,ÎóÂëÂÊBER=1.18850e-03
LTÂë£¬µ±Ç°¿ªÏú=2.35,µ±Ç°Ö¡ÊýÎª450, ÎóÖ¡ÂÊPER=1.00000e+00,ÎóÂëÂÊBER=2.14992e-03
RaptorÂë£¬µ±Ç°¿ªÏú=2.35,µ±Ç°Ö¡ÊýÎª450, ÎóÖ¡ÂÊPER=6.66667e-03,ÎóÂëÂÊBER=1.05644e-03
LTÂë£¬µ±Ç°¿ªÏú=2.35,µ±Ç°Ö¡ÊýÎª500, ÎóÖ¡ÂÊPER=1.00000e+00,ÎóÂëÂÊBER=2.37593e-03
RaptorÂë£¬µ±Ç°¿ªÏú=2.35,µ±Ç°Ö¡ÊýÎª500, ÎóÖ¡ÂÊPER=8.00000e-03,ÎóÂëÂÊBER=1.28380e-03
µ±Ç°ÐÅµÀ±ê×¼²î=100.00,¿ªÏú=2.35,µ±Ç°Ö¡ÊýÎª500, LTÂëÎóÂëÂÊBER_LT=2.37593e-03,RaptorÎóÂëÂÊBER=1.28380e-03
ÐÅµÀ±ê×¼²î·¶Î§Îª£º
Inf  
¿ªÏú·¶Î§Îª£º
2.35  
LTÎóÂëÂÊBER_LTÎª£º
2.37593e-03  
RaptorÎóÂëÂÊBERÎª£º
1.28380e-03  
Ê±¼äÒÑ¹ý 102858.795253 Ãë¡£
