# Supplementary material for: An Efficient Design of Systematic Rateless Codes
Source: Hindawi journal article supplement (doi:10.1155/2020/8068414), 2020-05-19
Supplement: f1 [file 8068414.f1.zip › supplementary files/Matlab_code_for_Figure1/Gene_Fig1.m]

%%%%%% ͼ1

%simu K'=2000
overhead_vec=[0.5:0.1:2.0];
Pe=[1.32925e-01  1.37900e-01  1.25600e-01  1.14100e-01  1.08750e-01  6.68500e-02  2.39250e-02  8.27083e-03  4.72414e-03  1.56818e-03  3.50877e-04  5.52310e-05  2.05255e-05  9.00000e-06  3.65000e-06  2.10000e-06];
semilogy(overhead_vec,Pe,'k^-','Linewidth',1);

%simu K'=5000
overhead_vec=[0.5:0.1:2.0];
Pe=[1.37190e-01  1.30940e-01  1.25350e-01  1.16920e-01  1.04200e-01  6.15300e-02  1.73200e-02  8.92000e-03  5.03636e-03  9.96970e-04  5.55556e-05  1.92045e-05  1.03413e-05  6.59545e-06  3.64531e-06  2.12000e-06];
hold on;semilogy(overhead_vec,Pe,'ko-','Linewidth',1);

%simu K'=10000
overhead_vec=[0.5:0.1:2.0];
Pe=[1.35735e-01  1.33040e-01  1.26365e-01  1.15315e-01  1.02045e-01  5.15250e-02  1.46100e-02  8.27600e-03  3.83902e-03  1.97550e-04  3.29000e-05  1.86875e-05  1.090000e-05  6.15000e-06  3.60000e-06  2.10000e-06];
hold on;semilogy(overhead_vec,Pe,'ks-','Linewidth',1);

% DDE
overhead_vec=[0.5:0.05:2];
Pe_DDE=[0.136553447243601   0.134186136693468  0.131581170263702...   
        0.128680558898765   0.125399521879030  0.121608407468063  0.117090012439793   0.111432247372588  0.103659755076702  0.089808205006294  0.027757828362802...
        0.018720408784945   0.014010215376214  0.010903144617018  0.008582949574756   0.006621243249686  0.004307193013420  0.000088981715292 0.000063490362072 0.000046196825104   0.000034055731244...
        0.000025338963199   0.000018982514824   0.000014292831241   0.000010803439907  0.000008190970146   0.000006225132829   0.000004739882162   0.000003614547997   0.000002759791586 0.000002109289574];
hold on;semilogy(overhead_vec(1:2:end),Pe_DDE(1:2:end),'k-','Linewidth',1)

% MI
overhead_vec=[0.5:0.05:2];
Pe_MI=[1.3578e-01   1.3328e-01   1.3052e-01   1.2745e-01   1.2398e-01   1.1998e-01   1.1526e-01   1.0950e-01...
       1.0301e-01   9.0410e-02   3.9516e-02   2.4325e-02   1.7863e-02   1.3863e-02   1.1038e-02   8.8481e-03...
       6.9666e-03   4.8760e-03   6.4694e-05   4.6853e-05   3.4426e-05   2.5551e-05   1.9105e-05   1.4363e-05...
       1.0843e-05   8.2117e-06   6.2356e-06   4.7446e-06   3.6160e-06   2.7596e-06   2.1083e-06];
hold on;semilogy(overhead_vec(1:2:end),Pe_MI(1:2:end),'k--','Linewidth',1)

% mean
overhead_vec=[0.5:0.05:2];
Pe_mean=[1.3329e-01   1.3059e-01   1.2764e-01   1.2438e-01   1.2072e-01   1.1651e-01   1.1149e-01   1.0514e-01...
         9.5977e-02   1.6917e-02   1.1854e-02   8.7227e-03   6.5309e-03   4.7150e-03   3.6811e-04   2.0125e-04...
         1.3039e-04   8.9835e-05   6.3932e-05   4.6429e-05   3.4181e-05   2.5408e-05   1.9020e-05   1.4313e-05...
         1.0815e-05   8.1974e-06   6.2286e-06   4.7419e-06   3.6156e-06   2.7604e-06   2.1096e-06];
hold on;semilogy(overhead_vec(1:2:end),Pe_mean(1:2:end),'k:','Linewidth',1)

hold on;plot([0.5:0.05:2],0.003831*ones(1,length(0.5:0.05:2)),'bx-','LineWidth',1);
axis([0.5 2 1e-6 1])
grid on;box on;
legend('K''=2000','K''=5000','K''=10000','DDE','GA-MI','GA-Mean','Critical BER')
xlabel('Overhead of inner SLT code (\epsilon)')
ylabel('BER')
