# Supplementary material for: An Efficient Design of Systematic Rateless Codes
Source: Hindawi journal article supplement (doi:10.1155/2020/8068414), 2020-05-19
Supplement: f1 [file 8068414.f1.zip › supplementary files/Matlab_code_for_Figure1/Readme.txt]

Run file "Gene_Fig1.m" to get Figure1
The data of finite length code simulation in above file is obained by running file "BER_by_Simulaiton/Main_Raptor_enc_dec.m" with different parameters
The data of GA-MI in above file is obained by running "BER_By_GA_mean/main_GA_exit.m"
The data of GA-mean in above file is obained by running "BER_By_GA_mean/main_GA.m"
The data of DDE in above file is obained by running "BER_By_DDE/DDE_algo_main_fixed_EsN0.m.m"
