# Supplementary material for: An Efficient Design of Systematic Rateless Codes
Source: Hindawi journal article supplement (doi:10.1155/2020/8068414), 2020-05-19
Supplement: f1 [file 8068414.f1.zip › supplementary files/Matlab_code_for_Figure2/Get_Pe_from_alpha_Iec.m]

function Pe_alpha_Iec=Get_Pe_from_alpha_Iec(alpha_vec,Iec_vec,sigma_ch_2_1)
Pe_alpha_Iec=zeros(length(alpha_vec),length(Iec_vec));
for ii=1:length(alpha_vec)
    alpha=alpha_vec(ii);
    [in_node_index,in_node_degree]=aita_from_alpha(alpha);
    for  jj=1:length(Iec_vec)
         Iec=Iec_vec(jj);
         Pe_alpha_Iec(ii,jj)=in_node_degree(in_node_index)*qfunc(sqrt((sigma_ch_2_1+in_node_index*(Jinv(Iec))^2)/4))';
    end
end
