# Supplementary material for: An Efficient Design of Systematic Rateless Codes
Source: Hindawi journal article supplement (doi:10.1155/2020/8068414), 2020-05-19
Supplement: f1 [file 8068414.f1.zip › supplementary files/Matlab_code_for_Figure2/global_opt.m]

%%% 20190802 ÍâÂë¡¢¹Ø¼üÎóÂëÂÊµÃµ½µÄ×îÓÅ½á¹ûµÄOH,betaºÍ×ÜÂëÂÊ
clear;clc;
% outer_code_rate=[0.90:0.01:0.99];
% Pe_target_vec=[0.0205	0.0185	0.0162	0.0142	0.0120	0.0100	0.0079	0.0059	0.0039	0.0019];  % ÍâÂëµÄ¹Ø¼üÎóÂëÂÊ
% outer_code_rate=50/51
% Pe_target_vec=0.00384
% Pe_target_vec=[0.0202	0.0182	0.0159	0.0138	0.0116	0.0097	0.0077	0.0057	0.0038	0.0020];  % ÍâÂëµÄ¹Ø¼üÎóÂëÂÊ
% outer_code_rate=[0.98];
% Pe_target_vec=[0.0039];  % ÍâÂëµÄ¹Ø¼üÎóÂëÂÊ
outer_code_rate=[0.98];
Pe_target_vec=[0.0039];
if length(outer_code_rate)~=length(Pe_target_vec)
    error('²»Æ¥Åä');
end
% Pe_target_vec=[0.0205	0.0185	0.0162	0.0142	0.0120];
sigma_n_2=0.977^2;
sigma_n=sqrt(sigma_n_2);
sigma_ch_2_1 = 4/sigma_n^2;

% Iec_max_mat=zeros(length(outer_code_rate),length(alpha_star_vec));
% OH_mat=Iec_max_mat;
% beta_mat=Iec_max_mat;
for ii=1:length(Pe_target_vec)
    Pe_target=Pe_target_vec(ii);
    
    Iec_ub=Jfunc(sqrt(4/sigma_n_2));
    alpha_vec=[3:0.1:20];
    Iec_vec=[0:0.01:Iec_ub];
    Pe_alpha_Iec=Get_Pe_from_alpha_Iec(alpha_vec,Iec_ub,sigma_ch_2_1);  
    alpha_star_lb=alpha_vec(find(Pe_alpha_Iec<Pe_target,1)) %alphaÏÂ½ç
    alpha_star_vec=[ceil(alpha_star_lb):0.5:ceil(alpha_star_lb)+12];
    alpha_star_mat(ii,:)=alpha_star_vec;
    
    [Iec_max_vec,OH_vec,beta_vec]=results_para_from_linear_prog_LT(alpha_star_vec,sigma_n_2,Pe_target);
    Iec_max_mat(ii,:)=Iec_max_vec;
    OH_mat(ii,:)=OH_vec;
    beta_mat(ii,:)=beta_vec;
    [min_OH(ii),location_min]=min(OH_vec)
    beta_min_OH(ii)=beta_vec(location_min)
end

alpha_star_max=ceil(alpha_star_lb)+12;
plot([0 alpha_star_max],[Iec_ub Iec_ub],'b--');
hold on;plot([alpha_star_lb alpha_star_lb],[0 3],'r-');

ii=1;
hold on;plot(alpha_star_mat(ii,:),Iec_max_mat(ii,:),'bs--');
hold on;plot(alpha_star_mat(ii,:),OH_mat(ii,:),'ro-');
min_Rate=outer_code_rate.*(1./(min_OH+1))


% hold on;plot(alpha_star_vec,Iec_max_vec,'ko-');
% hold on;plot(alpha_star_vec,OH_vec,'ks-');
axis([7 20 0 3]);
xlabel('\alpha*');
ylabel('Values of I_{E,C}^{max} and Resulting Overheads');
legend('I_{E,C}^{ub}=0.5013','\alpha^{lb}=7.7','I_{E,C}^{max}','\epsilon');
grid on;box on;
