# Supplementary material for: An Efficient Design of Systematic Rateless Codes
Source: Hindawi journal article supplement (doi:10.1155/2020/8068414), 2020-05-19
Supplement: f1 [file 8068414.f1.zip › supplementary files/Matlab_code_for_Figure2/linear_prog_LT.m]

%%%%%%%% 20190801 ÏßÐÔ¹æ»®½âÓÅ»¯ÎÊÌâÆÕÍ¨ÐÅµÀÏµÍ³Âë  %%%%%%
%%%Í¨¹ýÏßÐÔ¹æ»®ËÑË÷¶ÈÓÅ»¯ %%%%
% Ö»ÊÊÓÃÓÚSLTÂë£¨×÷ÎªSRÂëµÄ·ÖÁ¿Âë£©
clc;
clear;
format long
%%%%%%%%%%%%%%%%%%%%%%%%%%%%%%%%%%%%%%%%%%%%%%%%%%%
% rho=0         %¸ÉÈÅÒò×Ó
% sigma_2=0.9786^2/rho;  % ¸ÉÈÅµÄ·½²î
% if rho==0      % ±ÜÃâ³öÏÖInfÖµ
%     sigma_2=10;  % Öµ¿ÉÒÔËæÒâÉèÖÃ
% end
% sigma=sqrt(sigma_2);

sigma_n_2=0.977^2  % EsN0=1/(2*sigma_n_2)£¬ÊÇÒ»¸ö¹Ì¶¨Öµ   ÐÅÔë±È£¬¹Ì¶¨Öµ
sigma_n=sqrt(sigma_n_2);
sigma_ch_2_1 = 4/sigma_n^2;
sigma_ch_2_2 = Jinv( 1-Jfunc(sqrt(4/sigma_n^2)) )^2;      
% Iec_ub=rho*Jfunc(sqrt(4/(sigma_2+sigma_n_2)))+(1-rho)*(Jfunc(sqrt(4/sigma_n_2))) % IecµÄÉÏ½ç
Iec_ub=Jfunc(sqrt(4/sigma_n_2));


D=100;
d_vec=[1:D];
% d_vec=[1 2 3 4 5 8 9 19 65 66];
% channel_mode=1;%  1: PBI
% code_mode=1; % 1:NLT

% if channel_mode==1 
%       Pe0=qfunc(1/sigma)
% % Pe0=1/2*(1-1/sqrt(1+2*sigma^2))
% elseif channel_mode==2
%       Pe0=1/2*(1-1/sqrt(1+2*sigma^2))
% elseif channel_mode==3
%       syms b;
%       f1=sigma/(sqrt(2*b)*(1+sigma*sqrt(2*b)));
%       df1=diff(f1,m-1);
%       b_value=1/2/sigma^2+m;
%       diff_item=double(subs(df1,b,b_value));
%       Pe0=m^m*(-1)^(m-1)/prod(1:m-1)*diff_item   
% end
Pe_target=3.9e-3    %Ä¿±êÎóÂëÂÊ
L=400;   % ½«ÐÅÔë±ÈÇø¼äÊýÁ¿

%%%%%%%%%%% Ñ¡Ôñalpha ºÍ »¥ÐÅÏ¢µÄ×î´óÖµ  %%%%%%%%%%%%
alpha_vec=[3:0.1:20];
Iec_vec=[0:0.01:Iec_ub];
Pe_alpha_Iec=Get_Pe_from_alpha_Iec(alpha_vec,Iec_ub,sigma_ch_2_1);  
alpha_star_lb=alpha_vec(find(Pe_alpha_Iec<Pe_target,1)) % È·¶¨Ñ¡ÓÃµÄalphaÊÇÎªÁË±£Ö¤alphaÄÜ¹»µ½´ïÄ¿±êÎóÂëÂÊ
alpha_star=10
Pe_alpha_Iec=Get_Pe_from_alpha_Iec(alpha_star,Iec_vec,sigma_ch_2_1);
Iec_max=Iec_vec(find(Pe_alpha_Iec<=Pe_target,1))   % È·¶¨ÐèÒªÂú×ãÏßÐÔÔ¼ÊøµÄ»¥ÐÅÏ¢·¶Î§£¨×î´óÖµ£©
% Iec_max=0.2
% Iec_max=Iec_ub

Iec_k_vec=[Iec_max/L:Iec_max/L:Iec_max];  % ·¶Î§(0,Iec_max]
[in_node_index,in_node_degree]=aita_from_alpha(alpha_star);
var_degree=degree_node_to_edge(in_node_degree);
var_index=in_node_index;
%%%%%%%%%%%%%%%%%%%%%%%%%%%%%%%%%%%%%%%%%%%%%%%%%%%%%
c=1./d_vec;     % ÓÅ»¯Ä¿±êÏµÊý  

A=zeros(length(Iec_k_vec),length(d_vec));
Ac=A;
b=zeros(length(Iec_k_vec),1);
for kk=1:length(Iec_k_vec)
    Iec_k=Iec_k_vec(kk);
%         if code_mode==0
%            b(kk)=-2*qfuncinv(Pe_k)^2+2/sigma^2-0.0001;
%         elseif code_mode==1
%            b(kk)=-2*qfuncinv(Pe_k)^2-0.0001; 
%         end
        b(kk)=-(Iec_k);
        A_part1=(d_vec-1)*(Jinv(1-var_degree(var_index)*Jfunc(sqrt(sigma_ch_2_1 + (var_index-1)*Jinv(Iec_k)^2   ))'))^2;
%         A_part2=(Jinv(1-Jfunc(sqrt(4/(sigma_2+sigma_n_2)))))^2;
%         A_part3=(Jinv(1-Jfunc(sqrt(4/sigma_n_2))))^2; 
%         if kk==1
%             A(kk,1)=-  (rho*(1-Jfunc(sqrt(4/(sigma_2+sigma_n_2))))+(1-rho)*Jfunc(sqrt(4/sigma_n_2)) );
%             A(kk,2:end)=0;
%         else
            A(kk,:)=-(1-Jfunc(sqrt(A_part1+sigma_ch_2_2))) ;
%         end
%         if method==0
%             A(kk,:)=            -alpha*2*qfuncinv(1/2*(  1-(1-2*Pe_k).^(d_vec-1) + 2*(1-2*Pe_k).^(d_vec-1)*Pe0 )).^2;
%         else
%             A(kk,:)=-epsilon_0*d_vec.*2.*qfuncinv(1/2*(  1-(1-2*Pe_k).^(d_vec-1) + 2*(1-2*Pe_k).^(d_vec-1)*Pe0 )).^2;
%         end
end
Aeq=ones(1,length(d_vec));
beq=1;
% vlb=[0.0001*ones(18,1); zeros(length(d_vec)-18,1)];
vlb=zeros(length(d_vec),1);
vub=[];
% options=optimoptions('linprog','Algorithm','interior-point-legacy ','Display','iter');
% [omiga,fval]=linprog(c,A,b,Aeq,beq,vlb,vub,options )
% if method==0
    [omiga,fval]=linprog(c,A,b,Aeq,beq,vlb,vub);
    omiga_full(d_vec)=omiga;
    OMIGA=degree_edge_to_node(omiga_full)
    ch_index=find(OMIGA>0)
    OMIGA(OMIGA>0)
    beta=ch_index*OMIGA(OMIGA>0)'
%     epsilon_0=alpha_star/beta
    design_overhead=alpha_star/beta     %ÔÚÕâ¸öÂëÂÊÏÂÓ¦¸ÃÊÇ·ûºÏÎóÂëÂÊÒªÇóµÄ¿ªÏú
    if isempty(omiga)==1
        fprintf('Î´ÕÒµ½ÓÅ»¯½á¹û£¬ÇëÐÞ¸Ä²ÎÊý\n')
    else 
        plot(Iec_k_vec,[A*omiga b])
        find((A*omiga-b)>=0)
    end
    
% else
%     [OMIGA,fval]=linprog(c,A,b,Aeq,beq,vlb,vub)
%     find(OMIGA>0)'
%     OMIGA(OMIGA>0)'
%      if isempty(omiga)==1
%         fprintf('Î´ÕÒµ½ÓÅ»¯½á¹û£¬ÇëÐÞ¸Ä²ÎÊý\n')
%     else 
%     semilogx(Pe_k_vec,[A*OMIGA b])
%     find((A*OMIGA-(b+0.0001))>0)
%      end
% end
% OMIGA=degree_edge_to_node(omiga)
% % code_rate=1/(alpha*sum(omiga'./d_vec))
% % capacity=C2_BPSK(1/sigma^2)
% beta=d_vec(OMIGA>0)*OMIGA(OMIGA>0)'
