# Supplementary material for: An Efficient Design of Systematic Rateless Codes
Source: Hindawi journal article supplement (doi:10.1155/2020/8068414), 2020-05-19
Supplement: f1 [file 8068414.f1.zip › supplementary files/Matlab_code_for_Figure2/PE.m]

clear;clc;
sigma=sqrt(0.5);
epsilon_0=0.9;
Pe0=1/2*(1-1/sqrt(1+2*sigma^2))
Pe_k(1)=Pe0;
out_node_index=[  5    73   118];
out_node_degree(out_node_index)=[0.712331432582659   0.274732975094386   0.012935592322955];

for ii=1:1000
t=(1-2*Pe_k(ii)).^(out_node_index-1);
t1=1-t+2*t*Pe0;
Pe(ii)=qfunc(      sqrt(   1/sigma^2+(epsilon_0*sum(out_node_index.*out_node_degree(out_node_index)*2.*qfuncinv(1/2*t1).^2))/2  )    ) ;
Pe_k(ii+1)=Pe(ii);
end
semilogy(Pe_k)
