# Supplementary material for: An Efficient Design of Systematic Rateless Codes
Source: Hindawi journal article supplement (doi:10.1155/2020/8068414), 2020-05-19
Supplement: f1 [file 8068414.f1.zip › supplementary files/Matlab_code_for_Figure2/PE_ray.m]

clear;clc;
sigma=sqrt(1);
% epsilon_0=0.9;
alpha=40;
Pe0=1/2*(1-1/sqrt(1+2*sigma^2))
Pe_k(1)=Pe0;
% Pe_k_appr(1)=Pe0;
% out_node_index=[  5    73   118];
% out_node_degree(out_node_index)=[0.712331432582659   0.274732975094386   0.012935592322955];
% out_node_index=[ 4     7    33   200]; %ÔÚsigma=sqrt(1)£¬Pe_target=1e-4£¬alpha=30;D=200;Ê±ÓÅ»¯µÃµ½µÄÐ§¹û
% out_node_degree(out_node_index)=[  0.5842    0.2786    0.0824    0.0548];
% out_node_index=[15    19   200]; %ÔÚsigma=sqrt(1)£¬Pe_target=1e-4£¬alpha=30;D=200;Ê±ÓÅ»¯µÃµ½µÄÐ§¹û
% out_node_degree(out_node_index)=[   0.063945622446017   0.757960353007836   0.178094024546147];
out_node_index=[1:18 200];
out_node_degree(out_node_index)=[0.0036 0.0061 0.0106 0.0226 0.1337 0.6927 0.0024 0.0607 0.0097 0.0128 0.0049 0.0028 0.0013 0.0011 0.0009 0.0007 0.0005 0.0003 0.0326];

Pe=zeros(1,1000);
Pe_appr=Pe;
for ii=1:length(Pe)
t=(1-2*Pe_k(ii)).^(out_node_index-1);
p_uj_vec=1/2*(1-t+2*t*Pe0);
m_uj=2*qfuncinv(p_uj_vec).^2;
mu=out_node_degree(out_node_index)*m_uj';
Pe(ii)=qfunc(sqrt(alpha*mu/2))-1/sqrt(1+2*sigma^2)*qfunc(sqrt((1+2*sigma^2)*alpha*mu/2))*exp(sigma^2*alpha*mu/2);
% Pe(ii)=qfunc(      sqrt(   1/sigma^2+(epsilon_0*sum(out_node_index.*out_node_degree(out_node_index)*2.*qfuncinv(1/2*p_uj_vec).^2))/2  )    ) ;
Pe_k(ii+1)=Pe(ii);

% t_appr=(1-2*Pe_k_appr(ii)).^(out_node_index-1);
% p_uj_vec_appr=1/2*(1-t_appr+2*t_appr*Pe0);
% m_uj_appr=2*qfuncinv(p_uj_vec_appr).^2;
% mu_appr=out_node_degree(out_node_index)*m_uj_appr';
% Pe_appr(ii)=1/12*(1-1/sqrt(1+2*sigma^2))*exp(-alpha*mu_appr/4);
% % Pe_appr(ii)=(1/12-1/(12*sqrt(1+2*sigma^2)))*exp(-alpha*mu/4);
% Pe_k_appr(ii+1)=Pe_appr(ii);


end
semilogy(Pe_k);
% hold on;
% semilogy(Pe_k_appr);
