# Supplementary material for: An Efficient Design of Systematic Rateless Codes
Source: Hindawi journal article supplement (doi:10.1155/2020/8068414), 2020-05-19
Supplement: f1 [file 8068414.f1.zip › supplementary files/Matlab_code_for_Figure2/Q_naka.m]

function y=Q_naka(x,alpha,sigma,m)
% nakagami-mË¥ÂäÐÅµÀÖÐÎóÂëÂÊº¯Êý
syms b;
% b_value=1/2/sigma^2+m;
sigma2=sigma^2;
f2=sigma/(sqrt(2*b)-2*sqrt(2)*b^(3/2)*sigma2)*exp((2*b*sigma2-1)*alpha*x/4).*erfc(sqrt(b*alpha*x/2)*sigma)-sigma2/(1-2*b*sigma2)*erfc(sqrt(alpha*x)/2);
df2=diff(f2,m-1);
diff_item=double(subs(df2,b,1/2/sigma2+m));
y=m^m*(-1)^(m-1)/prod(1:m-1)*diff_item;
