# Supplementary material for: An Efficient Design of Systematic Rateless Codes
Source: Hindawi journal article supplement (doi:10.1155/2020/8068414), 2020-05-19
Supplement: f1 [file 8068414.f1.zip › supplementary files/Matlab_code_for_Figure2/Q_naka_inv.m]

function x=Q_naka_inv(y,alpha,sigma,m)
% nakagamiÐÅµÀÏÂQ_nakaÖÐ°üº¬¶àÖØÎ¢·Ö£¬¼ÆËãËÙ¶ÈºÜÂý£¬ËùÒÔÓ¦¸Ã½¨Á¢²éÑ¯±í£¬¼Ó¿ìËÙ¶È
% ±¾³ÌÐò¿ÉÒÔ½¨±í
% alpha=7.5;sigma2=0.5;m=2;sigma=sqrt(sigma2);
sigma2=sigma^2;
cc=1:1:9;
xx=[];
for ii=-8:1:-4
    xx=[xx cc*10^(ii)];
end
xx=[xx 0.001:0.001:10];

% yy=Q_naka(xx,alpha,sigma,m);
% save yy_a7_5_s2_05_m2 yy;

if alpha==10 && abs(sigma2-1)<10^(-6) && m==4
   load yy_a10_s2_1_m4
elseif alpha==15 && abs(sigma2-1)<10^(-6) && m==4
   load yy_a15_s2_1_m4
elseif alpha==16 && abs(sigma2-1)<10^(-6) && m==4
   load yy_a16_s2_1_m4
elseif alpha==17 && abs(sigma2-1)<10^(-6) && m==4
   load yy_a17_s2_1_m4
elseif alpha==18 && abs(sigma2-1)<10^(-6) && m==4
   load yy_a18_s2_1_m4
elseif alpha==19 && abs(sigma2-1)<10^(-6) && m==4
   load yy_a19_s2_1_m4
elseif alpha==20 && abs(sigma2-1)<10^(-6) && m==4
   load yy_a20_s2_1_m4
elseif alpha==25 && abs(sigma2-1)<10^(-6) && m==4
   load yy_a25_s2_1_m4
elseif alpha==30 && abs(sigma2-1)<10^(-6) && m==4
   load yy_a30_s2_1_m4
elseif alpha==5 && abs(sigma2-1)<10^(-6) && m==4
    load yy_a5_s2_05_m4
%%%%%%%%%%%%%%%%%%%%%%%%%%%%%%%%%%%%%%%%%%%%%%%
elseif alpha==10 && abs(sigma2-1)<10^(-6) && m==2
   load yy_a10_s2_1_m2
elseif alpha==15 && abs(sigma2-1)<10^(-6) && m==2
   load yy_a15_s2_1_m2
elseif alpha==16 && abs(sigma2-1)<10^(-6) && m==2
   load yy_a16_s2_1_m2
elseif alpha==17 && abs(sigma2-1)<10^(-6) && m==2
   load yy_a17_s2_1_m2
elseif alpha==18 && abs(sigma2-1)<10^(-6) && m==2
   load yy_a18_s2_1_m2
elseif alpha==19 && abs(sigma2-1)<10^(-6) && m==2
   load yy_a19_s2_1_m2
elseif alpha==20 && abs(sigma2-1)<10^(-6) && m==2
   load yy_a20_s2_1_m2
elseif alpha==25 && abs(sigma2-1)<10^(-6) && m==2
   load yy_a25_s2_1_m2
elseif alpha==30 && abs(sigma2-1)<10^(-6) && m==2
   load yy_a30_s2_1_m2
    %%%%%%%%%%%%%%%%%%%%%%%%%%%%%%%%%%%%%%%%%%%%%
elseif alpha==5 && abs(sigma2-0.5)<10^(-6) && m==2
    load yy_a5_s2_05_m2
elseif alpha==6 && abs(sigma2-0.5)<10^(-6) && m==2
    load yy_a6_s2_05_m2
elseif alpha==7 && abs(sigma2-0.5)<10^(-6) && m==2
    load yy_a7_s2_05_m2
elseif alpha==7.5 && abs(sigma2-0.5)<10^(-6) && m==2
    load yy_a7_5_s2_05_m2
elseif alpha==8 && abs(sigma2-0.5)<10^(-6) && m==2
    load yy_a8_s2_05_m2
elseif alpha==9 && abs(sigma2-0.5)<10^(-6) && m==2
    load yy_a9_s2_05_m2
elseif alpha==10 && abs(sigma2-0.5)<10^(-6) && m==2
    load yy_a10_s2_05_m2
    
    %%%%%%%%%%%%%%%%%%%%%%%%%%%%%%%%%%%%%%%%%%%%%
elseif alpha==3 && abs(sigma2-0.5)<10^(-6) && m==4
    load yy_a3_s2_05_m4
elseif alpha==4 && abs(sigma2-0.5)<10^(-6) && m==4
    load yy_a4_s2_05_m4
elseif alpha==4.5 && abs(sigma2-0.5)<10^(-6) && m==4
    load yy_a4_5_s2_05_m4
elseif alpha==4.6 && abs(sigma2-0.5)<10^(-6) && m==4
    load yy_a4_6_s2_05_m4
elseif alpha==4.7 && abs(sigma2-0.5)<10^(-6) && m==4
    load yy_a4_7_s2_05_m4
elseif alpha==4.8 && abs(sigma2-0.5)<10^(-6) && m==4
    load yy_a4_8_s2_05_m4
elseif alpha==4.9 && abs(sigma2-0.5)<10^(-6) && m==4
    load yy_a4_9_s2_05_m4
elseif alpha==4.95 && abs(sigma2-0.5)<10^(-6) && m==4
    load yy_a4_95_s2_05_m4
elseif alpha==4.99 && abs(sigma2-0.5)<10^(-6) && m==4
    load yy_a4_99_s2_05_m4
elseif alpha==5 && abs(sigma2-0.5)<10^(-6) && m==4
    load yy_a5_s2_05_m4
elseif alpha==6 && abs(sigma2-0.5)<10^(-6) && m==4
    load yy_a6_s2_05_m4
elseif alpha==7 && abs(sigma2-0.5)<10^(-6) && m==4
    load yy_a7_s2_05_m4
elseif alpha==8 && abs(sigma2-0.5)<10^(-6) && m==4
    load yy_a8_s2_05_m4
elseif alpha==5 && abs(sigma2-0.5)<10^(-6) && m==4
    load yy_a9_s2_05_m4
elseif alpha==5 && abs(sigma2-0.5)<10^(-6) && m==4
    load yy_a9_s2_05_m4
elseif alpha==10 && abs(sigma2-0.5)<10^(-6) && m==4
    load yy_a10_s2_05_m4
elseif alpha==15 && abs(sigma2-0.5)<10^(-6) && m==4
    load yy_a15_s2_05_m4
elseif alpha==20 && abs(sigma2-0.5)<10^(-6) && m==4
    load yy_a20_s2_05_m4
elseif alpha==25 && abs(sigma2-0.5)<10^(-6) && m==4
    load yy_a25_s2_05_m4
elseif alpha==30 && abs(sigma2-0.5)<10^(-6) && m==4
    load yy_a30_s2_05_m4
else
    error('Î´½¨Á¢²éÕÒ±í\n');
end
for ii=1:length(y)
    [vv,loc]=min(abs(y(ii)-yy));
    x(ii)=xx(loc);
end
