# Supplementary material for: An Efficient Design of Systematic Rateless Codes
Source: Hindawi journal article supplement (doi:10.1155/2020/8068414), 2020-05-19
Supplement: f1 [file 8068414.f1.zip › supplementary files/Matlab_code_for_Figure2/Q_ray.m]

function y=Q_ray(x,alpha,sigma)
% ÈðÀûË¥ÂäÐÅµÀÖÐÎóÂëÂÊº¯Êý
y=qfunc(sqrt(alpha*x/2))-1/sqrt(1+2*sigma^2)*qfunc(sqrt((1+2*sigma^2)*alpha/2*x)).*exp(sigma^2*alpha/2*x);
